# Supplementary material for: FoxP2 isoforms delineate spatiotemporal transcriptional networks for vocal learning in the zebra finch
Source: eLife. 2018 Jan 23;7:e30649. doi: 10.7554/eLife.30649 (PMC5826274; doi:10.7554/eLife.30649)
Supplement: Figure 1—source data 1. [file elife-30649-fig1-data1.xlsx]

## Sheet: Figure1C_source
animal	virus	foxp2	truncated
White381X	GFP	0.00539785	1.70174e-05
White360X	GFP	0.00576645	7.64689e-05
Red172X	GFP	0.00664254	8.59615e-05
DarkBlue688X	GFP	0.00698609	6.25947e-05
DarkBlue687X	GFP	0.00834715	NA
LightBlue556X	GFP	0.00475689	2.22074e-05
LightBlue559X	GFP	0.005318	4.0973e-05
White384X	FOXP2.FL	0.0110797	6.87411e-05
Red173X	FOXP2.FL	0.00881311	3.06603e-05
White385X	FOXP2.FL	0.00587729	5.77535e-05
White359X	FOXP2.FL	0.00574591	0.000118624
White383X	FOXP2.FL	0.00690345	6.82979e-05
Red152X	FOXP2.FL	0.00846915	4.10109e-05
LightBlue558X	FOXP2.10+	0.00784035	0.000119153
White389X	FOXP2.10+	0.0164614	0.000147415
White330X	FOXP2.10+	0.011514	8.56196e-05
LightBlue555X	FOXP2.10+	0.00762401	0.000115267
White388X	FOXP2.10+	0.0116955	0.000114423
LightBlue554X	FOXP2.10+	0.00502881	0.000269866
Values are averaged Ct for triplicate qPCR reactions
