# Supplementary material for: FoxP2 isoforms delineate spatiotemporal transcriptional networks for vocal learning in the zebra finch
Source: eLife. 2018 Jan 23;7:e30649. doi: 10.7554/eLife.30649 (PMC5826274; doi:10.7554/eLife.30649)
Supplement: Figure 2—source data 1. [file elife-30649-fig2-data1.xlsx]

## Sheet: effectSizeAcoustics
animal	construct	syllable	duration	amplitude	pitch	fm	am2	entropy	pitch.goodness	mean.freq	var.fm	var.entropy	var.pitch.goodness	var.mean.freq	var.am	similiarity	accuracy	identity
red152	fl	1	-0.108413	0.0349328	-0.394466	0.140741	0.0271248	0.305807	-0.0013694	-0.0352172	0.121309	0.126481	0.0272026	0.114855	0.0391928	0.0019129	0.00203371	0.00280682
red152	fl	2	-0.0861741	-0.175608	0.112562	-0.0735713	0.130372	-0.198289	-0.126512	-0.0825849	0.0236143	0.0888449	0.0295083	0.328289	0.1232	0.00483711	0.00493022	0.00890101
red152	fl	3	-0.161943	0.165387	-0.0663441	0.0525622	0.180992	0.151617	0.0882893	-0.0633	-0.0303665	-0.156934	-0.0560439	0.209821	0.162783	-0.00420534	-0.00452257	-0.00843327
white384	fl	1	-0.181281	0.0391028	-0.130494	-0.00309353	0.0349745	-0.0561205	0.0596107	0.0562582	-0.0699826	0.176546	0.193648	0.0504053	0.0425412	-0.00852405	-0.00114812	-0.0119831
white384	fl	2	-0.00513378	-0.180374	0.065845	-0.153527	-0.122159	-0.218006	0.128658	-0.342752	-0.172875	0.0203702	0.0684798	0.161941	-0.114125	-0.00864834	0.00388783	-0.0054872
white384	fl	3	-0.0839365	0.00591804	-0.291802	-0.0238304	0.0156168	0.0136394	0.0420398	-0.198304	-0.100141	0.0486179	-0.00533656	-0.136109	0.0263257	0.00339374	0.00388406	0.00428805
white385	fl	1	0.00284163	-0.219046	0.0327482	-0.018296	-0.184151	0.0364725	0.0164819	0.0280224	-0.138847	0.0988581	0.0119932	-0.0235124	-0.185019	-0.14297	-0.0637021	-0.200196
white385	fl	2	-0.245575	-0.106387	-0.173274	0.111368	-0.104696	-0.176153	-0.0695943	-0.0523375	0.0358622	0.0663392	-0.00595231	0.0450813	-0.115288	0.0172248	0.0086352	0.0240861
red172	gfp	1	4.68e-05	-0.205367	0.232346	0.025884	-0.0548604	-0.0271569	0.176406	-0.245046	-0.202941	0.0666941	0.17346	-0.181315	-0.0639036	-0.0109297	-0.00493409	-0.0156486
red172	gfp	2	-0.0767179	0.160666	0.0348271	-0.150685	-0.0832447	0.0501395	-0.12383	0.016771	-0.037557	0.0199665	-0.0369701	-0.0412964	-0.0900786	0.0061379	0.00205512	0.00693256
red172	gfp	3	-0.105831	0.0111466	0.0461664	-0.0266298	-0.063726	-0.198323	-0.475	0.134538	0.0861716	-0.0770511	-0.44682	0.223432	-0.0700283	0.0666864	0.0393275	0.0953782
red173	fl	1	0.0425297	0.312729	-0.440699	-0.172364	-0.140583	0.251556	0.220374	-0.00844777	-0.168054	-0.0640872	0.0574402	0.0613483	-0.146093	-0.00661961	-0.00831022	-0.0148145
red173	fl	2	-0.282267	-0.201333	0.123566	-0.496694	-0.0786766	-0.274925	-0.148211	-0.143409	-0.258666	-0.153468	0.0342953	-0.34894	-0.0709329	-0.00663907	-0.00543291	-0.0120083
red173	fl	3	0.0740649	0.107742	0.178514	0.137705	-0.0607558	0.0332664	0.206371	0.351664	0.0940453	0.0283836	0.233791	0.0628884	-0.0599833	0.0190893	0.0102576	0.0273494
red173	fl	4	0.0574026	-0.101259	-0.299615	0.163448	0.0906087	-0.265344	-0.11424	-0.0317782	-0.0186059	-0.0618028	-0.121894	0.0417137	0.107545	0.00511938	0.00505122	0.00804813
white389	10	1	0.106243	-0.168375	-0.358342	-0.072019	-0.209044	-0.00900163	0.0592192	-0.191291	0.193179	-0.0113686	0.0130646	-0.0429884	-0.212542	0.00153517	-0.00709801	-0.005637
white389	10	2	-0.175676	-0.207157	-0.0300829	-0.325309	-0.184307	-0.0671101	-0.156415	-0.31004	-0.219819	-0.0589271	-0.271719	0.0364014	-0.191431	0.0208795	0.0117504	0.0314636
lightblue558	10	1	0.194167	-0.151161	-0.134091	0.101845	0.0369864	0.133236	0.193327	0.135927	0.139675	0.123068	0.195503	-0.172887	0.0955154	-0.0256823	-0.0216197	-0.0451915
lightblue558	10	2	0.253236	0.119922	-0.380253	-0.0372421	0.0235595	0.0215091	-0.116273	-0.00327362	0.105691	-0.0307988	-0.107314	-0.124611	0.0268775	0.00098626	-0.00429376	-0.00435022
lightblue558	10	3	0.213185	0.0407358	-0.144797	0.0950301	0.112558	0.0292041	-0.03976	-0.00542231	-0.101891	-0.0809514	-0.0810563	-0.11611	0.10787	-0.00485891	-0.00504558	-0.00969869
lightblue555	10	1	-0.122125	0.228904	0.333246	-0.153598	0.0507038	0.0926374	0.00998129	-0.0783864	0.148408	-0.245626	0.0100553	-0.0480829	0.0458795	0.00134778	0.00236523	0.00229503
lightblue555	10	2	0.0262771	0.107182	0.0308813	0.090175	0.332923	0.0153116	0.0869479	0.0657842	0.103782	-0.0164435	0.169798	-0.129811	0.331467	-0.0100419	-0.00661302	-0.0163567
lightblue555	10	3	-0.0593161	0.172612	0.0278629	-0.0783202	-0.0141568	0.00832991	-0.0867687	0.137852	-0.108823	-0.163639	-0.162036	-0.0808434	-0.0140014	-0.00105639	-0.00102149	-0.00362002
lightblue555	10	4	-0.14597	0.0735581	0.00849893	0.0319297	0.0692033	0.119542	-0.174759	-0.0122026	0.16539	-0.13196	-0.0868747	-0.139501	0.0709942	0.0166548	0.0108997	0.0240066
lightblue555	10	5	0.00428127	0.316624	0.299217	0.123275	0.254624	0.178266	-0.0290564	0.151182	0.10165	0.0756744	-0.0377322	-0.179116	0.24572	-0.0101857	-0.00631398	-0.0154495
red171	fl	1	-0.0692645	0.16661	-0.0226976	-0.139283	-0.126415	0.0514385	0.162122	-0.148752	-0.196405	-0.179431	0.101759	-0.0624035	-0.130409	0.0186772	0.0146555	0.0323536
red171	fl	2	-0.0154252	0.0256506	-0.106137	-0.311333	0.00173087	-0.0737838	-0.112266	-0.29184	-0.0684365	-0.0468469	-0.0197885	-0.178583	0.00599057	0.0147461	0.00708807	0.0194354
red171	fl	3	0.147248	0.0908212	0.1645	0.111316	0.0342005	0.074193	0.0445212	0.0728742	0.0774206	0.0127828	0.0373752	-0.0273067	0.0356328	-0.0133338	-0.00915236	-0.0207114
red171	fl	4	-0.0363459	-0.0689004	0.131913	-0.0395473	0.132672	-0.264641	-0.0589774	-0.109967	-0.127611	-0.108492	-0.0659998	-0.0141281	0.138112	0.00459158	0.00640388	0.00996268
lightblue554	10	1	0.425162	-0.170273	-0.183729	0.0992788	0.220416	0.0919329	0.0893935	0.174146	-0.136844	-0.00407885	-0.0275681	0.0941828	0.219008	-0.0388176	-0.0187804	-0.0560059
lightblue554	10	2	-0.111725	-0.0947452	0.213742	0.117793	0.14524	0.0296705	-0.013564	0.0696677	-0.0660816	-0.12464	0.114466	-0.284738	0.143021	0.00211552	0.00493594	0.0055376
lightblue554	10	3	0.294072	0.171792	0.80382	0.286864	0.305741	0.159766	0.0258047	0.353221	0.0891268	0.164525	0.00567469	0.0842165	0.305251	-0.0264003	-0.0181878	-0.0433394
lightblue556	gfp	1	-0.383392	-0.473834	-0.421133	-0.23103	-0.260355	-0.270753	-0.214749	-0.42907	0.0470931	0.103354	-0.11988	-0.00499225	-0.286255	0.0408548	0.0359433	0.071884
lightblue556	gfp	2	-0.415757	-0.153645	-0.449679	0.0706991	-0.121916	-0.175156	-0.153711	0.00923511	-0.0950157	-0.131404	-0.164301	-0.155131	-0.128913	0.0022102	0.00693393	0.00910438
lightblue559	gfp	1	-0.00828002	0.0290198	0.212668	0.12622	0.138476	-0.0365868	-0.0354042	0.0938063	-0.104071	0.070445	0.0160152	-0.120612	0.156377	-0.0210494	-0.0371183	-0.0603872
lightblue559	gfp	2	0.0642085	-0.0317044	-0.0488597	-0.101652	-0.0283987	-0.0104363	0.24218	-0.0301599	-0.0987656	0.0594808	0.131785	0.182573	-0.0278656	-0.013386	-0.0610951	-0.0759665
lightblue559	gfp	3	-0.381242	-0.0341624	0.678204	-0.218436	-0.032836	-0.0536559	0.0568605	0.0729958	-0.0474345	0.118282	0.0751825	0.101664	-0.0292926	0.0093153	-0.024647	-0.0158394
lightblue559	gfp	4	0.152441	0.0501535	-0.238421	-0.0966808	-0.081429	-0.0943046	0.155251	0.00551803	0.0997627	-0.135372	-0.0810431	-0.0163048	-0.0887677	-0.0325986	-0.0132811	-0.0463492
Data represent raw acoustic features transformed using NS-UD/NS+UD.
