# Supplementary material for: FoxP2 isoforms delineate spatiotemporal transcriptional networks for vocal learning in the zebra finch
Source: eLife. 2018 Jan 23;7:e30649. doi: 10.7554/eLife.30649 (PMC5826274; doi:10.7554/eLife.30649)
Supplement: Figure 2—source data 2. [file elife-30649-fig2-data2.xlsx]

## Sheet: learningCurve
animal	virus	bin1	bin2	bin3	bin4	bin5
darkblue687	gfp	50.8	53.9	68.95	68.25	74.6
darkblue688	gfp	NaN	51.95	40.25	62.1	53.5
lightblue556	gfp	NaN	NaN	NaN	64.35	90.9
lightblue559	gfp	39.35	66.5	53.55	73.3	65.45
red172	gfp	28.9	28	36	39.45	39.35
white360	gfp	35.35	50.4	51.9	60.4	63.4
white381	gfp	39.25	61.8	73.7	75.1	83.2
lightblue554	10+	57.35	48.05	64.45	75.35	76.65
lightblue555	10+	40.275	NaN	62.25	72.55	80.425
lightblue558	10+	59	61.85	57.55	63.35	69.375
white330	10+	43.2	54.5	63.45	74.1	79.225
white388	10+	NaN	45.1	72.9	74.5	73.65
red171	fl	28.5	35.4	36.15	30.1	22.175
red173	fl	27.95	33.85	43.75	49.8	66.425
white359	fl	42	46.5	55.5	61	65.025
white384	fl	32.55	NaN	32.05	39.65	48.3
white385	fl	19.85	18.5	22.45	23.4	19.55
Data represent averaged acoustic similarity scores between 20 pupil motifs and a canonical tutor motif at each time bin.
