# Supplementary material for: FoxP2 isoforms delineate spatiotemporal transcriptional networks for vocal learning in the zebra finch
Source: eLife. 2018 Jan 23;7:e30649. doi: 10.7554/eLife.30649 (PMC5826274; doi:10.7554/eLife.30649)
Supplement: Figure 3—source data 1. [file elife-30649-fig3-data1.xlsx]

## Sheet: traitData
animal	Motifs	Tutor Similarity	Variability Induction	Motif Identity
DarkBlue687X	552	74.6	NA	59.2024
DarkBlue688X	820	55.2	NA	57.8404
LightBlue554X	1895	76.65	0.0475525	52.9033
LightBlue555X	792	84.2	0.103025	71.4918
LightBlue556X	474	95.05	-0.230488	55.3705
LightBlue558X	973	68.55	0.0664124	54.5749
LightBlue559X	545	76.25	-0.0517056	58.028
Red152X	1129	68.65	0.105387	69.3914
Red172X	0	36.5	-0.0531135	NA
Red173X	635	64.75	-0.0533145	62.5019
White330X	347	80.05	NA	56.2452
White359X	262	66.3	NA	60.8265
White360X	1438	66.05	NA	56.315
White381X	1539	82.3	NA	71.6238
White383X	NA	NA	NA	NA
White384X	828	45.32	-0.076251	55.1103
White385X	1210	18.45	-0.0779358	44.0535
White388X	NA	73.65	NA	NA
White389X	971	18.95	-0.0403336	46.0553
Scores for each behavioral metric correlated to gene networks.
