# Supplementary material for: FoxP2 isoforms delineate spatiotemporal transcriptional networks for vocal learning in the zebra finch
Source: eLife. 2018 Jan 23;7:e30649. doi: 10.7554/eLife.30649 (PMC5826274; doi:10.7554/eLife.30649)
Supplement: Figure 3—source data 4. — These data are the basis for panel 3B. [file elife-30649-fig3-data4.xlsx]

## Sheet: moduleTraitCor
module	motifs	tutor similarity	variability induction	motif identity
MEblack	-0.66277	0.2512	-0.681959	0.188934
MEgreenyellow	-0.258606	0.539365	-0.225992	0.169425
MElightgreen	-0.414779	0.334843	-0.28438	-0.0435558
MEpink	-0.372246	0.363832	-0.515094	0.426084
MEpurple	-0.32548	0.347305	-0.718225	0.257234
MEorange	-0.665341	-0.00372527	-0.609525	-0.154392
MEdarkred	-0.0204027	0.569824	-0.263904	0.294032
MEgreen	0.0507736	0.455304	-0.430297	0.392871
MEred	0.0660203	0.309303	-0.0834842	-0.15428
MEdarkgrey	-0.0349602	0.123162	0.507853	0.563625
MEdarkturquoise	0.00325044	0.15759	0.417158	0.0823639
MEwhite	-0.0996663	-0.018164	-0.388998	-0.381108
MEcyan	-0.446638	-0.3704	0.0849052	0.125134
MEgrey	-0.257545	-0.218219	-0.404427	-0.118276
MEturquoise	-0.155328	-0.143889	-0.707208	-0.115929
MEgrey60	-0.0404463	-0.281929	0.27319	0.218224
MEmagenta	0.240998	-0.0148064	0.73119	0.0326048
MEbrown	0.0737173	-0.350698	0.72658	-0.221623
MEmidnightblue	0.223354	-0.355634	-0.0685744	-0.198547
MEdarkgreen	0.473801	-0.168227	0.727516	-0.192473
MEroyalblue	0.614387	-0.0366893	-0.165945	-0.116143
MEblue	0.780158	-0.237699	0.3117	-0.428713
