# Supplementary material for: FoxP2 isoforms delineate spatiotemporal transcriptional networks for vocal learning in the zebra finch
Source: eLife. 2018 Jan 23;7:e30649. doi: 10.7554/eLife.30649 (PMC5826274; doi:10.7554/eLife.30649)
Supplement: Figure 6—source data 1. — Columns are ordered from left to right by increasing tutor percentage similarity attained by that bird. Rows are sorted by the gene’s significance to learning. [file elife-30649-fig6-data1.xlsx]

## Sheet: learningExpr
	White385X	White389X	Red172X	White384X	DarkBlue688X	Red173X	White360X	White359X	LightBlue558X	Red152X	White388X	DarkBlue687X	LightBlue559X	LightBlue554X	White330X	White381X	LightBlue555X	LightBlue556X
MAPK11	3.452	3.6007	3.87162	3.67778	3.72989	3.98017	3.9314	3.94019	3.80892	3.77433	4.13252	4.16764	4.01191	3.79112	3.86552	4.19228	4.06153	4.26946
UBE2N	7.87883	7.96736	7.81838	8.0527	8.05459	8.09365	8.01604	8.19994	8.0907	8.23539	8.24087	8.34712	8.2071	8.18141	8.01389	8.35451	8.19059	8.43523
LINS	2.81234	2.82038	3.28125	3.24645	3.34435	3.68431	3.67191	3.96809	3.4661	3.15406	2.99745	3.70955	3.84216	4.28298	3.73173	4.018	3.80226	4.08302
TMEM163	4.72896	4.67453	4.99998	4.5076	4.67919	5.0024	4.86931	5.09884	5.15505	5.21905	5.29701	4.99833	5.08456	5.11132	5.1239	5.08301	5.34673	5.42042
TUSC3	6.56701	6.40589	6.90757	6.64891	6.86536	7.03563	6.9261	7.02988	7.01799	7.1418	6.81292	6.76314	7.06314	7.15006	6.93216	6.86768	6.87913	7.31589
FBXO8	4.57525	4.5308	4.84271	4.57081	4.9196	4.8321	4.77677	4.90421	4.90932	4.7621	5.19671	5.08578	4.7535	4.91998	4.94422	5.39798	4.91677	5.27728
CSGALNACT1	3.67016	3.42426	3.85624	3.50193	3.77732	4.21029	3.982	4.14709	4.18459	3.90326	4.00701	3.76369	3.9701	4.30792	3.78149	4.48041	4.15168	4.45279
DPH6	2.51066	2.39908	2.72142	2.42181	3.01442	3.14862	2.78373	3.39116	3.30434	2.84822	2.9744	2.69109	3.28584	3.0284	3.16879	2.84093	3.22888	3.86393
C8H1orf27	5.95103	5.69239	6.01164	6.01491	5.85071	6.31413	6.27739	6.42432	6.19661	6.12163	6.3477	6.3836	6.11768	6.12855	6.08668	6.29591	6.18136	6.42455
PACRGL	4.68685	4.71435	4.51905	4.70859	4.95555	5.03595	4.86967	5.12909	4.83751	5.21093	4.95313	5.09726	5.09384	4.9477	4.81117	5.11225	4.96748	5.19912
PLEKHA5	4.55583	4.15169	4.3486	4.52694	4.56206	5.06239	4.82929	5.12083	5.07216	4.83627	5.00694	5.23701	4.93778	4.43042	4.94795	5.41547	4.76196	5.24106
IL10RB	2.84069	2.6847	4.84861	3.22771	4.12247	4.9743	4.94229	5.30294	4.94122	4.74454	3.91856	4.61662	4.79424	4.51663	5.23547	4.95657	3.93612	5.70013
CCNC	4.23609	4.71983	4.37472	4.75865	4.40926	4.89672	4.77605	4.76987	4.75189	4.93143	5.07466	4.59282	4.85749	4.87124	4.82913	4.82117	4.91714	5.31216
HINT3	5.53674	5.28118	5.98399	5.47093	5.62326	5.93092	5.77337	6.06985	5.91201	5.83526	5.91353	6.06459	5.78215	5.75649	6.03747	5.76585	5.90844	6.3007
GALT	3.68964	3.76319	3.88505	3.8144	4.07641	3.92335	3.93346	4.0376	4.00921	4.13666	3.85918	NA	4.08913	4.25201	4.06173	3.84506	4.19439	4.06464
MLH3	1.74222	1.53837	2.36496	1.66783	2.51841	2.51003	2.40358	2.86957	2.15045	2.14463	2.20643	2.12914	2.41442	2.19618	2.21925	2.60985	2.55891	3.26187
MRPL45	5.78478	5.69856	5.9802	5.73087	6.33145	6.33637	5.95749	6.05763	6.4148	5.97127	5.93515	6.2844	6.3322	6.5065	6.23187	6.27235	6.21237	6.23712
LOC100224867	4.64793	4.63138	5.24548	4.85355	4.95472	5.18961	4.91533	5.201	5.05843	4.97531	5.15231	5.10177	4.86477	5.30884	5.3036	5.13434	5.17757	5.19352
EEF1E1	6.70117	6.6102	6.64924	6.7034	6.69034	6.74784	6.7998	6.67053	6.67562	6.75875	6.82447	6.91321	6.86346	6.80937	6.67768	7.00657	6.78362	7.03491
STXBP6	3.15015	3.4189	3.58141	3.55755	3.25636	3.5937	3.71158	3.49106	3.6537	3.68839	3.87509	3.50297	3.88266	3.51969	3.4443	3.91531	NA	4.17033
UBE2D1	4.08262	4.92849	4.54698	4.86009	4.51471	4.83014	5.19392	5.46794	4.98068	5.0911	5.24698	5.45138	5.39767	5.00434	4.69183	5.18045	4.99057	5.67645
DNM1L	6.73742	6.7987	6.76869	6.97852	6.88645	7.11394	7.04995	6.94466	6.78889	7.08442	6.94519	7.09005	7.12684	6.94137	6.83746	6.9499	7.12349	7.33499
RPA3	4.60207	4.83695	4.97398	4.00162	5.01158	5.33356	5.69806	5.29761	5.5465	6.04673	6.10345	5.59047	5.226	5.88675	4.96886	5.31861	5.46769	6.38179
PIKFYVE	4.56249	4.57829	4.66558	4.6554	4.58906	4.8467	4.7128	4.87393	4.58824	4.75379	4.92241	4.83868	4.67344	4.63127	4.6904	4.90577	4.98256	5.0204
TMEM18	5.89799	6.30689	6.21382	6.6831	6.1309	6.54798	6.39751	6.95857	6.8164	7.08058	6.70151	6.88049	6.85926	6.78721	6.32828	6.72717	6.59255	6.9563
SF3B5	5.40047	5.69458	5.77234	5.64383	6.1857	5.64196	5.78113	5.60901	6.06449	6.08647	5.81613	5.93694	6.01856	6.03263	5.95563	5.98331	5.92805	6.25272
SLC25A3	8.59579	8.62466	8.52667	8.72632	8.51041	8.8637	8.86008	8.93862	8.67001	8.74849	8.82648	8.95572	8.87884	8.72343	8.65032	8.90974	8.8125	9.03157
MLC1	5.93359	6.16594	6.29593	6.24927	5.76659	6.53368	6.48752	6.77388	6.35326	6.4073	6.61519	6.7501	6.58558	6.66744	6.08363	6.77953	6.50656	7.00067
RAN	8.28303	8.245	8.19696	8.30667	NA	8.455	8.41251	8.53697	8.29871	8.29459	8.48145	8.4787	8.4319	8.4171	8.36023	8.40514	8.41118	NA
LACTB2	4.56996	4.89433	5.58144	5.36026	5.12773	5.72731	5.65818	6.00862	5.23598	5.29512	5.65824	5.32326	5.7658	5.25992	5.19522	5.74321	5.79008	5.97052
LOC100225043	5.82442	5.98453	5.95671	6.10114	5.84111	6.19517	6.14581	6.28729	6.00899	6.05027	6.18515	6.2059	6.18275	6.06786	5.96481	6.20635	6.1542	6.46346
UBXN2B	3.90787	3.92282	4.38621	4.30102	4.23604	4.58643	4.29391	4.42323	4.08195	4.42405	4.52922	4.37146	4.28713	4.28945	4.20007	4.32866	4.41758	4.79021
PSMD14	7.35987	7.23818	7.19626	7.29805	7.17081	7.45981	7.43842	7.45597	7.43652	7.47349	7.49229	7.5569	7.45099	7.34168	7.38839	7.42892	7.37838	7.66864
MEOX2	0.926456	0.725991	1.20596	1.08981	1.12174	1.58474	1.94265	1.37317	1.46792	1.34846	1.68047	1.4994	1.05971	1.67836	1.27844	1.12629	1.49827	1.81882
SMIM14	4.90427	4.8657	5.02339	5.04493	4.83115	5.06085	5.18333	4.86234	5.07706	5.13104	5.34938	5.03614	5.17642	5.01626	5.05287	5.45138	5.2021	5.44185
JADE3	4.94805	4.65317	4.65958	4.64295	4.70575	4.96456	4.98466	4.85642	5.01121	4.8766	4.95246	5.02558	5.06938	5.03053	4.79402	5.0817	4.91507	5.19661
MRPL51	6.79004	7.03698	7.19384	6.86758	7.52721	7.31105	7.23225	7.19033	7.42118	7.14267	7.00455	7.34996	7.29186	7.64708	7.29264	7.42222	7.27752	7.57588
ORC3	4.01372	4.04404	4.39071	4.12105	4.41675	4.41391	4.3566	4.31518	4.35793	4.42845	4.37671	4.44454	4.24964	4.2716	4.20816	4.26913	4.38272	4.71468
AP4S1	5.69946	5.83206	5.62021	5.98805	5.77012	6.10528	5.99524	6.45573	5.88679	6.2792	6.29694	6.26328	6.06442	5.91285	6.09063	6.19438	5.92218	6.50078
C15H22orf39	3.54158	3.64366	4.4732	4.59814	5.83142	5.06746	5.26449	6.25506	5.74564	5.52096	4.81075	5.41795	5.29354	5.94241	4.75758	4.47943	5.4392	5.4525
C8H1orf123	6.37869	6.33411	6.53556	6.1681	6.62097	6.72119	6.48145	6.97585	6.68205	6.58892	6.42244	6.65149	6.61772	6.7124	6.83959	6.59205	6.70611	6.93384
STK17A	4.79559	4.50267	5.16684	4.43066	4.72275	5.24066	5.83337	5.35814	5.11271	5.13542	5.61865	5.31287	4.95969	5.93925	4.98343	5.47121	5.22449	6.03231
RNF13	7.54391	7.41031	7.60718	7.52392	7.31687	7.72312	7.6264	7.89003	7.56281	7.81791	7.7602	7.85126	7.69387	7.57049	7.629	7.92008	7.73564	8.10209
TM9SF2	6.82557	6.80795	6.83094	6.99751	6.70562	7.07308	7.09863	6.99748	6.84285	7.2148	7.20416	7.3116	7.04412	7.02252	6.83377	7.41209	7.15549	7.35346
PPP1R3C	4.71983	4.46263	5.16494	4.08834	4.57596	4.868	5.21992	5.141	5.20389	4.87521	4.82286	5.1567	5.39029	5.40109	4.95824	5.2121	5.1255	5.61813
TECPR2	4.90298	4.8424	5.0348	5.02043	4.94638	4.96424	5.17558	5.09397	5.08329	4.90564	5.14018	5.06629	5.19364	4.97656	4.99845	5.01391	5.27241	5.41351
COMMD6	5.387	5.13667	5.43609	5.22638	5.44428	5.36747	5.38932	5.58439	5.27953	5.60659	5.47842	5.88923	5.55475	5.48096	5.38171	5.69874	5.66508	5.75402
LOC101234137	1.2674	0.693891	0.662933	0.863102	1.65228	1.67174	1.72165	2.33257	1.60131	2.09778	1.26178	2.27398	2.31385	1.4621	1.46021	1.63199	1.26068	2.84952
GPAM	5.32227	5.23193	5.32806	5.19637	5.01132	5.42963	5.48086	5.51333	5.4977	5.52655	5.40495	5.46915	5.39579	5.25283	5.55221	5.73365	5.56068	5.82928
LOC105759264	1.75461	1.35795	2.64924	1.66553	2.16781	2.86311	2.85586	2.0984	2.60622	1.97229	3.06836	1.58253	2.9155	2.38617	2.47327	2.70625	2.83352	3.45959
LOC105758977	1.1516	1.69407	1.52639	1.29391	1.61698	2.05536	1.89883	1.72666	2.04213	1.95715	1.48496	1.83705	2.02216	1.5325	2.05554	1.64553	1.86166	2.41035
RBM45	5.21168	5.05094	5.13356	5.05366	5.03826	5.41388	5.51479	5.54848	5.41717	5.32238	5.28272	5.37602	5.27947	5.63354	5.28374	5.41309	5.23613	5.68654
MRE11A	3.00994	3.43284	3.44464	3.49803	3.7051	3.6361	3.81218	3.76533	3.46825	3.62266	3.82416	3.61578	3.73045	3.28755	3.45583	3.79113	3.79236	3.81873
ZFYVE21	4.29169	4.39853	4.92768	4.73343	4.55447	4.74199	4.53209	5.01646	4.69657	4.83374	4.58264	5.01385	4.75868	4.78844	4.78927	5.14895	4.69114	5.46174
LOC100225655	6.53582	6.58129	7.09742	7.09137	6.84766	7.40067	7.13285	7.39359	6.87123	7.35498	7.41981	7.32614	7.07591	6.71621	6.85748	7.48468	7.25159	7.58998
PDK1	4.10144	4.50898	4.73607	4.56453	4.66078	4.77134	4.94271	4.819	4.69336	4.57063	5.1777	4.52168	5.07889	4.50313	4.65288	4.8103	4.86151	5.20355
PARK2	2.53366	2.30161	2.49047	2.41163	2.68017	2.78385	2.88779	2.69686	2.85035	3.03547	2.40997	2.66014	2.75991	2.76256	2.7242	2.64831	2.7095	3.45281
CGRRF1	6.25858	6.52889	6.86539	6.60103	6.27181	6.81951	6.73646	6.73359	6.85862	6.92168	6.9766	6.6691	6.96483	7.05304	6.65058	6.8573	6.62694	7.32664
RNASEH1	6.57375	6.48155	6.75663	6.65929	6.75439	6.77472	7.05267	7.10891	6.63934	6.75058	7.15956	7.23507	6.80402	7.04899	6.75702	7.09231	6.78299	7.00299
SDCBP	7.94569	8.01624	7.99943	8.19443	7.9734	8.19703	8.09153	8.33735	7.95429	8.2851	8.20301	8.2977	8.26592	8.05265	8.15683	8.44874	8.13761	8.46526
LOC105760292	1.95432	2.17636	2.80731	2.77001	3.03372	3.1267	3.3501	3.30146	2.86275	2.88783	3.15309	1.73849	3.64001	3.10235	2.96139	3.21431	3.29714	3.73823
RHOA	8.78103	8.98272	8.70226	8.9815	8.97363	9.05247	8.97813	9.0349	8.94191	9.07862	9.10181	9.05283	8.92038	9.02571	8.99073	9.21167	8.92998	9.18001
TMEM50B	7.06415	7.30076	7.36053	7.23664	7.3433	7.26356	7.28257	7.29469	7.56537	7.51411	7.23916	7.54219	7.5861	7.50767	7.32649	7.38665	7.40116	7.80987
LOC100218870	5.84002	5.95173	6.15603	6.20778	6.21709	6.35082	6.22922	6.62535	6.10317	6.40952	6.35434	6.42036	6.21409	6.10246	6.06459	6.31702	6.25092	6.72567
PDK3	5.54777	5.24329	5.53581	5.25617	5.25301	5.66104	5.60181	5.66757	5.49674	5.3833	5.60518	5.69242	5.53494	5.50599	5.72772	5.66981	5.6423	5.9461
CSE1L	5.5853	5.66805	5.58626	5.70473	5.69917	5.80475	5.68461	5.79601	5.69432	5.81094	5.74451	5.83737	5.69591	5.71234	5.65016	5.76637	5.83112	NA
LOC105759344	2.49002	2.72127	3.76293	3.2199	4.1049	4.30471	4.11662	4.38979	3.82209	4.02685	4.35442	3.10038	3.36455	4.16469	3.29218	4.2678	3.63245	4.62083
LOC101233513	5.90419	5.75891	6.01248	5.88535	5.87783	6.41904	6.30328	6.58431	5.89684	6.15138	6.64393	6.17373	6.24987	5.90185	6.40749	6.1829	6.15249	6.90775
LTBP2	4.13574	4.38317	6.00308	3.98374	5.29645	5.79771	5.65689	5.74117	5.87334	5.53164	5.47298	5.19627	5.98452	5.79337	4.76304	5.24042	5.8902	6.29411
SRSF7	6.82056	6.8619	6.98177	6.93914	6.85459	7.14554	7.00739	NA	6.9009	7.28268	7.02757	7.31588	7.02754	7.08265	7.01211	7.13269	7.08464	NA
CHIC1	4.10492	4.30724	4.43562	4.48134	4.46917	4.43214	4.46397	4.59429	4.38892	4.44369	4.55887	4.35573	4.55135	4.35896	4.29921	4.63459	4.49871	4.90024
RBX1	7.04091	7.66729	7.20313	7.51749	7.41891	7.62803	7.61107	7.77546	7.58943	8.04624	7.60939	7.88663	7.69594	7.94572	7.46458	7.92464	7.4974	7.96602
LOC105760399	2.37113	1.9828	2.77839	2.39943	2.69904	3.64543	3.68599	4.19005	2.63124	3.51845	3.66452	3.91441	2.99231	4.20346	2.8025	2.92869	3.23416	3.54955
NELL1	6.3547	6.275	6.43127	6.44374	6.42588	6.74365	6.75847	6.6451	6.51543	6.60233	7.0134	6.68451	6.41012	6.26884	6.4951	6.96665	6.91616	6.90907
NDUFAF4	6.13232	5.88609	6.07426	6.02989	6.16681	6.36884	6.34698	6.401	6.17165	6.49679	6.44527	6.58014	6.30436	6.2279	6.38271	6.52531	5.8883	6.69643
ELP4	3.81695	4.36244	4.36631	4.38761	4.48479	4.37364	4.19051	4.53205	4.27853	4.77597	4.44852	4.69421	4.60664	4.33536	4.19802	4.64135	4.60901	5.03185
LOC100230565	4.52239	4.7302	5.26537	4.60027	5.13898	5.36373	5.33144	5.37183	5.02424	4.85304	5.31787	4.97606	5.17272	5.35148	4.9948	5.02889	5.24356	5.43516
MTX2	7.32497	7.60186	7.18043	7.50245	7.5303	7.67635	7.39814	7.56346	7.68087	7.84521	7.68932	7.71997	7.62512	7.85307	7.46068	7.64394	7.66283	7.86676
MPLKIP	3.28984	3.46293	3.82409	3.70364	3.58851	3.58071	3.74912	3.84819	3.73043	3.56136	3.75985	3.80854	3.69661	3.82034	3.74358	4.02311	3.50816	3.95298
MRPL39	4.63706	4.44763	4.21286	4.17903	4.44625	5.03831	4.77756	4.84389	5.08047	4.41866	4.80811	4.73338	4.85483	4.6921	4.51533	4.82618	4.98022	5.32045
TOLLIP	7.87584	8.1228	7.96784	8.24178	7.95741	8.26014	8.30183	8.25463	8.14601	8.33939	8.44439	8.22687	8.35367	8.15144	7.86192	8.49227	8.42156	8.58282
VMA21	6.17078	6.49577	6.44442	6.53877	6.27931	6.55211	6.47054	6.69246	6.36251	6.43975	6.60644	6.64432	6.65824	6.67874	6.3453	6.77371	6.56541	6.99335
WDR75	4.40145	4.56044	4.05045	4.47137	4.38996	4.54512	4.63098	4.59499	4.59232	4.65431	4.64135	4.68677	4.53786	4.48223	4.76552	4.81726	4.43056	5.00988
UFM1	5.80629	6.28142	5.6605	6.46212	6.13742	6.55685	6.5237	6.59156	6.34946	6.73474	6.39805	6.51031	6.56867	6.70064	5.95692	6.6144	6.34441	6.80962
PDXP	5.88056	6.22252	6.33333	6.02645	6.39618	6.52631	6.24168	6.46777	6.26437	6.65262	6.18215	6.59509	6.18733	6.41554	6.53195	6.21627	6.46129	6.8243
SMIM18	4.68852	4.60599	4.92637	5.04375	5.09099	5.40743	5.29153	4.77292	5.04663	5.42017	5.0557	4.87891	5.01867	5.02676	5.20858	5.05945	4.96981	5.54288
TMEM41B	5.76691	5.73065	5.61707	5.86617	5.643	5.93188	5.89559	5.86451	5.74032	5.9291	5.86632	6.04382	5.82039	5.98754	5.8946	5.89779	5.76972	6.28286
LOC100226910	3.51138	3.30921	4.49984	3.90638	3.81595	4.43667	4.38657	4.56492	3.93173	4.00518	4.45029	4.13062	3.6108	4.23335	NA	NA	4.28693	4.75685
TAF1A	4.37666	4.46067	4.19459	4.74369	4.16864	4.68255	4.69066	4.80183	4.45144	4.43233	4.72806	4.85859	4.50794	4.70776	4.78734	4.67125	4.7208	4.88598
BRF1	4.93205	4.79578	4.95695	4.81979	4.76717	4.99278	5.2909	4.96978	4.92341	4.99534	5.14501	5.28325	5.08014	5.06243	4.82126	5.14833	5.14341	5.35359
FAM188A	6.38082	6.60813	6.56977	6.6164	6.40014	6.79443	7.00664	6.73487	6.38499	6.73041	6.98526	6.80643	6.76079	6.79831	6.55093	6.72372	6.89099	7.17834
ST13	6.98474	6.84642	7.21665	7.01099	7.09387	7.15109	7.20465	7.55411	7.08907	7.19215	7.33774	7.25933	7.13395	7.06351	7.0711	7.19541	7.28344	7.51291
DPH5	5.35881	5.579	5.76976	5.56516	5.79856	5.86472	5.77404	5.79146	6.02134	5.84508	5.551	6.0737	5.59386	5.95674	6.02033	5.8105	5.59627	6.15984
LOC105760846	7.00035	6.9844	7.25089	7.15049	7.21104	7.2665	7.1661	7.44029	7.24998	7.22321	7.24663	7.06363	7.43268	7.27166	7.22563	7.19287	7.30043	NA
PRDX3	8.8425	8.68427	8.68037	8.55686	8.55792	9.01514	8.96749	9.10341	8.75432	8.82991	8.79114	9.12258	8.98785	8.93437	9.058	8.85195	8.94276	9.14365
RNF4	5.83261	5.74812	5.59736	5.93672	5.60456	5.90405	5.85641	5.96106	5.84896	6.05118	5.86079	6.06276	5.9651	5.80918	5.81894	6.12159	5.94186	6.30239
TSSC4	4.65492	4.78413	5.23724	4.92371	5.33571	5.31486	5.01494	5.45062	5.13161	5.0362	5.27685	5.11512	5.26059	4.97689	5.07314	5.21777	5.0336	5.59245
TMEM144	3.89741	3.50006	3.65716	4.18767	3.81772	4.02787	3.56553	3.74938	3.65866	3.87936	4.10651	3.99767	4.14131	3.94996	4.27823	4.47515	4.03383	4.58814
FBXO9	6.84063	6.58185	6.88359	6.80944	6.70264	6.90962	6.86773	7.01684	6.75401	6.86658	7.00079	7.08563	6.87638	6.79665	6.78391	7.01445	6.9348	7.2039
SMCO4	2.63923	3.49189	2.92608	3.24345	3.12304	3.22893	3.39799	3.69971	3.34845	4.23444	3.41808	4.31155	3.64407	4.02365	3.32364	3.28708	3.81616	3.98858
ACP1	6.64653	6.93992	6.89086	6.85404	6.77457	6.90354	7.00263	6.98001	6.78778	6.86336	6.89824	7.04445	6.91519	7.00788	6.83071	7.11679	6.96674	7.20642
LRP12	6.76189	6.7354	6.3844	6.96974	6.63069	6.76386	7.03449	6.79213	6.90018	6.91555	7.0106	6.90387	6.98683	6.97158	6.79939	7.19359	6.80402	7.1658
TMEM9B	6.59558	7.02789	6.87422	6.94324	6.78471	7.13408	7.056	7.28998	6.69809	7.26829	7.18739	7.22765	7.36549	7.02508	6.87366	7.06974	7.16127	7.58062
DNTTIP1	5.08963	5.16758	4.85947	5.48532	5.34939	5.51121	5.65522	5.49488	5.71015	5.21753	5.3878	5.68004	5.64351	5.75993	5.37723	5.53823	5.39477	5.37444
GNPDA2	6.06148	5.97147	6.08382	6.00886	6.00283	6.28265	6.05816	6.37482	6.05816	6.08586	6.35164	6.34703	6.10439	6.003	6.15047	6.56269	6.26112	6.49709
HACE1	4.89512	4.84975	4.88658	5.00099	4.71708	5.00709	4.95551	5.09081	4.99559	4.90372	4.98028	5.03125	5.03341	4.87434	5.01358	4.98277	5.07609	5.25586
LOC101234107	5.80756	6.03225	6.2548	6.08606	6.05261	6.42224	6.3944	6.49281	6.3812	5.87482	6.53908	5.94596	6.42284	6.59859	6.11459	6.22837	6.47702	6.78605
TSPAN13	7.65281	8.11691	7.69614	8.13959	7.94911	8.06118	8.21274	8.12581	7.97166	8.11704	8.31939	8.35645	8.34312	8.26413	7.77431	8.29823	8.1294	8.37995
TMC6	2.91869	3.08344	3.40719	3.19924	3.47993	3.28933	3.15164	3.48108	3.54356	3.53667	3.28834	3.38494	3.53345	3.73039	3.20559	3.30747	3.39207	3.52087
ZNF706	7.0801	7.11797	7.43579	7.35381	7.36714	7.50652	7.33879	7.605	7.20353	7.32523	7.54255	7.38996	7.47801	7.18885	7.2832	7.42785	7.49025	7.70997
GLRX5	6.30492	7.00325	6.93818	7.39961	6.89005	7.44393	7.59304	7.92467	7.13785	7.676	7.94917	7.45723	7.56405	7.12181	6.52066	7.59319	7.56108	8.07222
CCDC12	4.03543	4.01263	4.08477	4.09337	4.13849	NA	4.55897	4.51079	4.58198	4.28789	4.23387	4.24403	4.36016	NA	4.44779	4.21532	3.99979	4.69789
FAR1	5.53745	5.59218	5.72923	5.73534	5.62892	5.82278	5.75464	5.69856	5.61149	5.92045	6.01391	5.94511	5.74644	5.55295	5.74594	5.90532	5.75284	6.07015
C2H8orf22	3.8539	3.87319	4.73877	3.58731	3.83127	4.3756	4.11763	4.70008	4.36259	3.93639	4.4614	4.46571	4.72675	4.46736	4.52903	4.85277	4.42843	4.59597
COMMD4	6.04618	6.00575	6.49496	6.16199	6.67972	6.81761	6.80276	6.97012	6.60614	7.01947	6.29029	6.20449	7.00701	6.80273	6.34947	6.426	6.58032	7.22314
EXOC6	4.95466	5.17977	5.15901	5.50407	5.22161	5.47025	5.50311	5.37288	5.32245	5.30367	5.54794	5.39153	5.32136	5.16045	5.19696	5.58109	5.33022	5.58066
RNF215	4.63806	4.88975	5.11673	4.74075	5.45755	5.53351	5.02081	5.41092	5.74937	5.15533	4.84252	5.28253	5.8633	5.5091	5.16617	4.93836	5.38602	5.97578
TMEM206	7.58622	7.41184	7.47801	7.48197	7.51363	7.73967	7.44753	7.63489	7.82798	7.63131	7.73983	7.80885	7.55028	7.4895	7.64669	7.83862	7.58111	7.94568
EMC7	7.09791	7.25493	6.97627	7.18757	7.04576	7.16469	6.97704	7.24787	7.21228	7.53807	7.26538	7.41907	7.42108	7.33652	7.28771	7.34096	7.30301	7.65306
SPTSSA	5.08937	5.23122	4.89322	5.37816	5.26229	5.33599	5.23118	5.5088	5.3384	5.3545	5.38691	5.53848	5.24306	5.49967	5.21178	5.34119	5.21454	5.84944
MRPL33	6.64311	6.68119	6.53338	6.53633	6.27085	6.87877	6.88726	6.95058	7.008	6.86776	7.03789	7.07397	6.99007	6.9334	6.48014	7.02724	6.84671	7.21845
CEBPG	5.71492	5.98232	5.77768	6.00188	5.71452	5.96212	6.15851	6.22044	6.05894	5.98872	6.12803	5.9435	6.04599	6.05993	5.94565	6.0925	5.94661	6.23146
PIGP	4.03287	4.38461	3.69176	4.8015	4.14761	4.40995	4.49331	4.41689	4.06173	4.48343	4.71661	4.8818	4.28285	4.6647	4.57011	5.22615	4.71232	4.82438
SLC25A32	3.8923	4.33106	4.23332	4.2751	3.961	4.39048	4.44414	4.58398	4.24016	4.0517	4.35793	4.40839	4.34862	4.27753	4.42135	4.65039	4.29227	4.87591
SPOCK2	9.89134	10.1419	10.0538	9.96339	10.1734	10.0541	10.1065	10.0859	10.3406	10.2362	10.1027	10.0595	10.029	10.1838	10.1744	NA	10.2035	10.5023
ATG4B	6.16361	6.19168	6.28524	6.30309	6.55365	6.26043	6.28971	6.51259	6.51083	6.54181	6.30096	6.32322	6.3837	6.45931	6.32526	6.29109	6.4243	6.71647
SKA3	2.0248	1.41026	1.49396	1.28087	2.10575	2.18184	2.23342	2.52247	1.75486	1.99066	1.90929	2.07597	2.12877	1.37113	2.19358	2.25544	2.43799	2.96298
ARF4	7.67162	8.17302	7.91951	8.17129	7.89654	8.15217	8.17548	8.17795	8.00637	8.38717	8.30019	8.17491	8.29783	8.15745	7.82705	8.21125	8.31018	8.63858
LOC101233878	6.3924	6.48023	NA	6.58899	NA	6.89135	6.79518	6.82202	6.85422	6.90197	6.61762	7.11857	6.98357	6.748	6.38181	6.84947	6.69618	7.00386
ZFAND4	4.58025	4.51047	5.02503	4.8888	4.73672	4.935	4.78055	5.14225	4.70596	4.88696	4.9548	5.07897	4.64309	4.78987	4.81811	5.16935	4.99098	5.26931
DZANK1	2.41895	2.4291	3.18865	2.69774	2.89484	2.84688	3.07233	2.98903	3.3412	2.69648	3.07564	2.80069	3.34458	2.51998	3.31325	3.04963	2.92649	3.32321
LOC100220447	2.59967	2.27834	2.62402	3.47652	2.74178	3.78392	3.37347	2.92848	3.23397	3.4366	3.2643	3.37224	3.38804	2.72866	2.81388	3.54116	3.09615	3.33918
ABLIM2	5.51567	5.29646	5.80977	5.53684	5.43347	5.8069	5.82575	5.74027	5.62924	5.62305	5.99397	5.93655	5.67715	5.47542	5.49777	5.96732	5.77673	6.1072
ARMC10	2.69413	3.61619	2.89047	3.54118	3.10525	3.93155	3.48743	3.76702	3.43298	3.55147	3.79399	4.23984	3.67029	3.35461	3.4407	3.81985	3.31405	4.15976
LOC100229922	2.78548	2.93044	2.81831	3.0665	3.1911	3.22376	3.21112	3.1826	3.09256	3.47098	3.91402	3.73429	3.13375	2.93425	3.01557	3.34322	3.34481	3.41745
YWHAZ	10.5343	10.5751	10.5691	10.676	10.3631	10.8034	10.8305	10.8153	10.5051	10.9116	10.9539	10.7423	10.8562	10.7204	10.517	10.8536	10.8018	11.038
RAB21	6.28992	6.44557	6.3839	6.52163	6.1694	6.48066	6.73294	6.43601	6.28044	6.5367	6.75797	6.67446	6.59454	6.45338	6.45599	6.61312	6.67004	6.8643
LOC101234180	3.74768	4.23032	3.98137	4.19526	4.35067	4.55176	4.29733	4.89345	4.34651	4.35162	4.14733	4.8963	4.48024	4.71354	4.02411	4.30046	4.49407	4.70103
RNF24	4.58748	4.76491	4.52098	4.55721	4.83363	4.52196	4.73423	4.72831	4.69612	4.87138	4.87539	4.91851	4.84541	4.86177	4.71942	4.62067	4.96841	5.12902
LOC105758628	6.43291	6.64386	6.854	6.82372	6.84932	7.05426	7.00935	7.00425	7.05361	7.03469	6.7571	6.96394	7.09641	7.20922	6.41467	6.70648	7.26909	7.4731
NAE1	6.35363	6.646	6.80182	6.52843	6.84268	6.88573	6.69121	7.15497	6.81695	6.7945	6.84775	6.87634	6.76722	6.89932	6.68025	6.658	6.74895	7.1626
TGDS	4.52956	4.37943	4.37292	4.45947	4.5494	4.8178	4.69237	5.02921	4.52167	4.97922	4.70547	4.9567	4.65554	4.5444	4.60054	4.96798	4.51459	4.96055
LOC105758496	5.50738	5.73467	5.82372	5.88281	6.0592	5.8923	6.16333	6.32238	6.28849	5.59037	5.9898	6.03562	6.12801	6.25705	6.20861	5.93724	6.14891	5.90636
CNIH4	4.72596	5.18088	5.02024	4.96631	5.07381	5.15205	4.99578	5.20566	5.11637	5.15882	5.40234	5.14254	5.11355	5.1232	5.0259	5.41834	5.00259	5.54963
D2HGDH	5.14526	5.40835	5.97285	5.30557	6.27048	6.22039	5.7721	6.35956	5.87241	6.17126	6.09212	5.7331	6.11556	5.89551	6.15962	5.58077	5.59697	6.63185
LOC100228291	4.81984	4.87225	5.22271	5.05907	4.91119	5.08832	5.04647	5.30931	4.96318	5.23929	5.30953	5.15054	5.2718	4.92604	4.96636	5.46609	5.06898	5.56391
ARL8B	6.50813	6.65921	6.7869	6.63268	6.72676	6.86548	6.77421	6.86789	6.76182	7.05477	6.77799	6.67628	6.92686	6.93504	6.7364	6.69093	6.69529	7.19915
GNB5	6.61193	6.40769	6.63635	6.79156	6.24935	6.84375	6.80473	7.02552	6.7711	6.58785	6.70781	6.83992	6.75771	6.59514	6.64573	6.85304	6.9755	7.17425
LOC100231559	1.57485	1.86662	3.02444	2.08807	2.58938	2.46843	3.50718	3.13804	2.65789	3.07383	2.0011	3.60494	3.85481	2.27398	2.74816	2.20476	2.96867	3.98307
SNX5	4.0947	3.93785	3.88985	3.91356	3.87379	4.18893	4.2543	4.16734	4.11266	4.2106	4.20117	NA	4.00755	3.97558	4.1447	4.29878	4.04993	4.37492
ZFAND2B	5.74622	6.18801	5.7714	5.99172	6.13972	6.0683	5.9442	6.32489	6.14318	6.14333	5.90525	6.30204	6.25972	6.44833	6.15931	6.13145	6.14708	6.32298
C1H11orf73	6.17461	6.14317	6.33786	6.2106	6.26746	6.38657	6.21583	6.81028	6.29949	6.43319	6.2952	6.64968	6.39558	6.33755	6.43328	6.41234	6.32159	6.68375
GRB10	4.13089	3.79256	3.80698	3.9984	NA	3.96652	4.09007	4.06753	4.08244	4.12879	3.95121	4.3018	4.11759	4.05072	NA	4.22845	3.97979	4.27563
ALG5	4.93267	4.84826	4.80659	5.12622	4.79109	5.09185	4.94466	4.9634	4.88903	5.17245	5.03555	5.45864	5.15686	5.07057	5.10742	5.31151	4.871	5.46451
ALS2	4.73504	4.624	4.96226	4.94743	4.97927	5.06321	4.96848	5.08848	4.87654	4.93048	5.04465	4.61557	5.19078	4.9454	5.12355	4.83904	5.03098	5.24572
HIGD1A	6.75719	6.67555	6.97693	6.57938	7.00566	7.0687	6.95466	7.10452	7.07385	6.94296	6.59828	7.22335	7.21913	7.14348	7.15412	6.97686	6.76382	7.41878
LOC100226837	0.885598	0.592545	3.13418	1.30478	1.99276	2.54503	2.68653	3.12951	2.43736	1.8829	2.46266	1.50635	2.68338	2.53962	1.71305	2.47261	2.10973	2.96572
MFSD9	5.26732	5.13415	5.30153	5.43092	5.24503	5.4985	5.42982	5.21293	5.24207	5.13443	5.58079	5.47362	5.52004	5.27193	5.25232	5.54341	5.54984	5.85556
RNF166	5.87362	5.85219	5.87482	5.89507	5.89459	5.89385	5.98942	6.0201	5.97622	6.07496	NA	5.80472	6.07005	6.16768	6.00272	5.94415	5.87825	6.30511
DPYD	NA	2.15826	2.19919	2.07812	2.33489	2.3792	2.62215	2.3846	2.53021	2.50736	2.65129	2.50762	2.36491	2.4556	2.4612	1.96612	2.56319	2.80495
LAMTOR3	7.2683	7.46585	7.60509	7.40679	7.46229	7.46553	7.44257	7.8689	7.50472	7.65951	7.45608	7.79558	7.4843	7.66532	7.52957	7.68098	7.5251	8.04196
PRKCI	5.98358	6.22041	6.22649	6.39741	6.2111	6.4982	6.46737	6.34701	6.16541	6.27961	6.48435	6.38463	6.44869	6.13266	6.21375	6.49439	6.35774	6.52726
QDPR	5.71817	5.74501	5.69362	5.73452	5.5457	5.7444	5.80244	6.07152	5.98471	6.31423	6.15502	6.21084	5.89402	6.32827	5.83571	5.72718	5.90115	6.50806
ARMC1	6.38557	6.67496	6.56272	6.76311	6.46831	6.82992	6.79671	7.09489	6.67992	6.74935	6.84546	6.88435	6.72607	6.73837	6.4705	6.90032	6.84298	7.04038
GCLM	3.9748	4.26165	4.39153	4.73078	4.08333	4.5834	4.64916	4.44185	4.13771	4.68778	5.12197	4.75904	4.70471	4.29069	4.47769	4.96413	4.28606	5.33585
LOC100228970	4.70675	NA	4.81454	4.84181	5.13154	5.15019	5.15929	5.11122	5.55144	5.50872	5.54542	5.43253	5.63399	5.85368	4.88611	4.88221	5.82949	5.19262
LOC105759372	3.7698	3.33162	4.67707	3.80987	4.45026	4.45857	4.19966	4.80363	4.52065	4.45054	3.96918	4.5695	4.27365	4.75239	4.00736	4.51258	4.02886	4.93006
RPS16	7.74458	8.00547	7.6811	7.71527	7.83608	8.03016	7.94983	8.09029	8.18528	7.87241	7.85001	8.18134	8.25129	8.28735	7.82547	7.92861	7.98976	8.45261
SRP9	6.24187	6.5184	6.08955	6.67028	6.21895	6.69169	6.80762	6.71241	6.50924	6.54519	6.74856	6.69115	6.67242	6.64936	6.23729	6.73588	6.67723	6.88175
SSR1	6.68259	6.40168	6.49445	6.7501	6.44612	6.70777	6.84961	6.79271	6.66109	6.62246	7.04567	6.6062	6.72238	6.8565	6.54901	6.71928	6.78672	7.15873
LOC100221786	3.61285	3.73121	3.71402	4.04854	4.28552	4.72377	4.57182	4.95003	4.38421	4.4476	4.17778	3.99293	4.52232	3.76567	3.96752	4.25327	4.21291	4.87218
RINT1	5.26614	4.99434	5.36708	4.97262	5.45715	5.4473	5.16663	5.08532	5.20265	5.19035	5.45844	5.59534	5.22692	5.24881	5.81267	5.31325	5.65365	5.87648
AVL9	4.06437	4.15511	4.53553	4.29143	4.25439	4.315	4.37105	4.59934	4.44135	4.32893	4.48	4.2582	4.6176	4.04467	4.49581	4.33282	4.75777	4.90057
SLC16A14	5.67563	5.8871	6.32712	6.24801	6.11879	6.32325	6.47008	6.31491	5.89637	5.7184	6.67022	6.17557	6.14835	6.28562	5.93871	6.80363	6.70544	6.7713
TRAPPC11	4.58341	4.68941	4.92841	4.80883	4.66725	4.96124	4.91134	4.76705	4.80037	4.82301	4.85546	4.85617	4.80019	4.68521	4.75489	4.97549	4.88403	5.23305
CAV2	3.20282	3.27304	3.42815	3.25662	3.43597	4.1809	3.45991	3.85958	3.87142	4.0856	4.26792	2.98198	3.85422	3.86673	3.28159	3.74114	3.74009	4.81154
LOC100218769	3.66627	3.40804	3.70574	3.5032	3.77143	4.25494	3.8871	4.30249	3.98593	4.40542	4.00649	3.87867	4.02147	3.98952	4.00176	4.02666	3.7746	3.82505
U2AF1	6.43832	6.64767	6.32373	6.69561	6.41339	6.88914	6.80336	6.93703	6.60784	6.82225	6.9471	6.80778	6.82093	6.67949	6.43237	6.83133	6.70755	7.04572
PDCD10	5.86329	6.02479	5.86941	6.25535	5.86578	6.13693	6.12267	6.28091	5.97796	5.9826	6.20049	6.28278	6.10484	6.14553	6.03917	6.40862	5.99689	6.48141
2017-09-15	6.2581	6.77503	6.30541	6.89832	6.22163	6.88157	6.79627	7.0626	6.74298	6.92786	7.01831	6.95871	7.13089	7.10141	6.20783	7.0166	7.04735	7.25025
ATP1B1	11.1705	10.9843	11.0469	11.0979	10.8515	11.2288	11.2875	11.0423	11.0227	11.3607	11.4362	11.3629	11.1025	11.1364	11.2811	11.3666	11.2266	11.4373
C6H10orf32	5.57452	5.57557	6.03643	5.78268	5.99892	5.65558	5.67824	6.34934	5.79298	5.9696	5.90838	6.01361	5.97114	6.12308	5.91655	5.8826	5.84044	6.52319
RAD51AP1	4.07291	4.11923	5.15216	4.64607	5.00488	5.20094	4.87005	5.81281	4.21651	4.44476	4.9657	4.89293	4.67618	4.70813	5.03546	5.28951	5.15423	5.49231
CRY2	7.97355	7.55255	7.87892	7.66412	7.81008	8.0271	7.931	8.46592	7.90236	8.16547	7.95572	8.23686	8.01428	8.09585	7.75249	8.08095	7.98236	8.4404
IPP	4.7693	4.3435	4.35507	4.46222	4.54291	4.81813	4.84578	4.88755	4.47127	4.83334	5.1126	4.55027	4.63347	4.77043	4.69073	4.67779	4.80919	5.12318
THG1L	3.80382	3.74138	4.12795	4.08489	3.92654	4.63848	4.69697	4.92886	4.48606	4.06298	3.54034	4.16917	4.33747	4.61773	4.47376	4.63244	4.12254	4.92404
TMEM158	7.79035	8.03235	7.87598	7.92339	8.10283	7.94427	8.23537	8.01158	8.17167	8.16382	8.17995	8.22844	8.20904	8.10771	7.7658	8.04269	8.18034	8.29523
LOC100219250	5.23524	5.25379	5.15832	5.4659	5.14536	5.45658	5.29581	5.58728	5.07394	5.44251	5.65786	5.51386	5.41862	5.27966	5.4205	5.59159	5.39587	5.74842
MTMR9	5.16419	5.1441	5.64021	5.39612	5.79056	5.76427	5.6714	5.53002	5.36857	5.26923	5.73921	5.419	5.71722	5.54781	5.49046	5.36691	5.76699	5.89618
RAB9A	4.80734	5.06704	4.94099	4.99228	4.55981	5.13193	5.32349	5.2762	5.23968	5.11764	5.28576	5.39421	5.3449	5.05136	4.78653	5.40801	5.15279	5.61287
DCUN1D2	5.48449	5.11835	5.29086	5.3822	5.4006	5.69864	5.72124	5.85598	5.43421	5.65008	5.45808	5.71701	5.58163	5.37243	5.21679	5.67575	5.59135	6.01304
SRI	7.68069	8.16118	8.03163	8.10426	7.99117	8.12641	8.0479	8.1926	7.91612	8.13261	8.14091	8.30957	8.48083	8.28973	7.90078	8.06104	8.29662	8.5173
ATP5J	7.52874	7.59468	8.13659	7.41781	7.96234	8.82072	8.36729	8.80176	8.7236	8.3457	8.01567	8.33206	8.67817	8.26237	7.7421	7.69592	8.19243	9.16029
LOC100224495	7.31408	7.35303	7.21125	7.33745	7.42523	7.52717	7.51682	7.55516	7.7964	7.40527	7.41613	7.45239	7.44147	7.42335	7.32086	7.49846	7.53701	7.65192
MMGT1	3.82142	3.94697	3.75244	3.59956	4.08667	4.3519	4.53247	4.56594	4.2978	3.88542	4.02289	4.24728	4.80313	4.00733	4.18106	3.99974	4.0535	4.80751
MTG1	4.6224	5.04434	4.28831	4.81138	5.13187	5.0662	5.20808	5.11528	5.42869	5.11083	5.06516	5.25251	5.21879	5.55986	4.5116	5.06084	5.03826	5.8019
SCOC	7.59063	7.56928	7.98322	7.91613	7.63433	7.88504	8.00368	8.29241	7.59653	7.99118	8.20116	8.32995	7.79407	7.65335	7.94374	8.27891	8.04456	8.21005
KRTCAP3	2.36629	3.03267	2.88927	3.17794	3.75974	3.36489	3.11547	4.21779	4.06216	4.1149	3.7493	3.20828	3.65082	3.30421	2.78892	3.20623	3.67671	4.15864
ATOX1	5.94461	6.02398	6.18718	5.80543	6.17488	6.45117	6.15531	6.07515	6.43815	6.16254	6.32257	5.93858	6.34372	6.52619	6.23061	6.1212	6.14045	6.60993
CRACR2A	2.68127	2.54287	2.93958	2.90158	3.31293	3.49869	3.29343	3.85696	3.2766	3.17145	3.86689	3.92592	3.23072	3.43771	2.88435	3.06104	3.44118	3.09008
CHCHD4	5.05265	5.66157	5.11156	5.66208	5.27974	5.88196	5.70931	5.56199	5.65041	5.75462	5.48071	5.69597	5.92209	6.00053	5.15046	5.75734	5.65259	6.15243
TMEM123	6.16859	6.42727	6.63845	6.67859	6.14473	6.54273	6.45476	6.87381	6.26779	6.35532	6.59387	6.53309	6.62303	6.51537	6.95517	7.04538	6.71492	6.99844
VAMP1	5.37169	5.59069	5.62054	5.46428	5.75803	6.00081	5.97836	5.75053	6.25819	5.84167	5.4318	5.71053	5.97041	5.67985	5.77596	5.63492	5.82913	6.24175
WDR61	6.06912	6.35097	6.18998	6.18194	6.3115	6.2794	6.2442	6.59574	6.3225	6.54636	6.27538	6.60409	6.28299	6.41645	6.12614	6.37844	6.50248	6.91635
RNF138	3.7158	4.34705	4.2278	4.47778	3.66613	4.40841	4.50651	4.57965	4.37813	4.54376	4.53938	4.2161	4.47797	4.43437	4.00855	4.67413	4.49023	4.99235
UBE2G2	5.11837	5.11979	5.51491	4.95143	5.42063	5.35772	5.11593	5.345	5.39223	5.52547	5.39396	5.23129	5.42163	5.5184	5.41331	5.2017	5.43687	5.7839
LOC100229493	4.53903	4.49933	4.83323	4.78623	4.55303	4.74467	4.77992	5.01817	4.80293	4.61992	4.96755	4.55306	4.86358	4.59633	4.77706	4.84947	4.8528	5.10054
TOMM22	7.22955	7.44426	7.41834	7.39516	7.66356	7.35678	7.40585	7.41919	7.67712	7.57559	7.35678	7.50086	7.57272	7.684	7.47773	7.4408	7.52596	7.82383
AKTIP	5.66961	5.78546	5.85456	5.78155	5.80122	5.92409	5.80792	6.31411	5.70752	5.88545	5.88653	5.97656	5.93552	5.71471	6.02391	5.91362	6.02249	6.28648
ETNPPL	5.54706	5.43952	5.59266	5.34279	5.24005	5.57435	5.72885	5.82979	5.7694	5.82387	5.35831	5.90617	5.82238	5.82013	5.49253	6.14402	5.52285	6.3321
GCAT	4.6954	4.48022	5.08559	4.2333	5.11212	5.49556	4.93391	5.14362	5.50138	5.8655	5.23861	4.62149	5.44865	5.21713	4.81427	4.78851	5.3314	6.01059
RGCC	7.21752	7.61805	7.36385	7.60427	7.25356	7.59868	7.56971	7.58141	7.69472	7.59487	7.61285	7.86513	7.77153	7.96461	7.25516	7.90443	7.64258	7.83427
TNFAIP8L3	4.08906	3.98559	4.56526	4.18247	4.69732	4.62847	4.70666	4.49309	4.92401	4.47201	4.69634	4.38871	4.48776	4.289	4.29647	4.18882	5.30016	5.01238
NDUFAF5	3.7234	3.7705	4.01717	3.73908	3.88998	4.49226	4.06619	3.93016	4.22023	4.17406	4.13793	4.15752	3.93102	4.66825	3.52836	3.98265	4.39237	4.97365
FBXL2	4.87507	5.18776	4.81952	5.01352	5.28843	4.83817	5.11323	5.56995	5.11867	5.26419	5.17915	5.21133	5.16943	5.08277	5.14378	5.18901	5.42872	5.63676
RAMP3	1.7669	2.06589	2.17136	2.37627	2.04103	2.34586	1.97593	1.81907	1.87034	2.29421	2.67333	2.18641	2.8222	2.27534	2.30755	2.76753	2.11518	2.92487
TSPAN6	4.66444	4.14042	4.65665	NA	4.5613	4.65689	4.3344	4.93332	4.98038	4.98513	4.95279	4.78448	4.45933	5.02397	4.89387	4.61693	4.75955	5.02727
CZH9orf85	4.94545	4.99697	5.13431	5.47447	5.12032	5.45814	5.56792	5.7638	5.32206	5.30578	5.55894	5.61518	5.53615	5.42307	5.35538	5.44597	5.46419	5.08693
PRDX1	9.0943	9.23771	9.07171	9.0742	9.19061	9.32436	9.10108	9.23785	9.38031	9.64858	9.34548	9.26725	9.28441	9.40353	9.19548	9.27243	9.27056	9.51679
AASDHPPT	5.30487	4.82859	5.02192	5.19342	5.32826	5.40667	5.44779	5.31207	5.29729	5.95525	5.08961	5.67199	5.44315	5.05796	5.17097	5.39832	5.57015	5.8477
DNER	7.36173	7.36048	7.51563	7.33272	7.30669	7.51581	7.54522	7.5601	7.48988	7.54047	7.50035	7.54335	7.48671	7.3294	7.32474	7.559	7.61828	7.74617
NDST3	4.69845	4.79319	4.86452	4.94646	4.9486	4.81233	5.06568	5.25997	4.86555	4.76849	5.10828	4.91958	5.02296	5.09365	4.79472	4.88745	5.23503	5.14511
NSUN4	2.86016	3.46131	3.91359	3.38979	3.64257	3.84211	3.717	4.0682	3.9511	3.82022	4.11424	3.20687	3.7991	4.03824	3.45888	3.49037	3.70532	4.74068
ST7	4.73968	4.56125	5.09166	4.86164	4.99838	5.31169	5.20218	5.66725	4.91465	4.70668	5.04237	5.31455	5.00484	4.97979	5.23407	4.93709	5.04326	5.51999
THAP9	3.92387	3.97614	4.04577	4.0599	4.06601	4.08307	4.06421	4.26929	4.03921	4.30144	4.09677	3.92234	4.12838	4.11854	4.10411	4.13866	4.0231	4.44571
BCAP29	4.82336	5.31329	5.09873	5.50126	5.05771	5.05763	5.19351	5.13736	5.36202	5.20175	5.4424	5.60811	5.65447	5.3594	5.13276	5.37122	5.36607	5.68563
LOC100219393	5.13512	5.14238	5.62867	5.19773	5.16383	5.64247	5.32173	5.99265	5.33321	5.87005	5.70844	5.81022	5.16231	5.66413	5.49891	5.59409	5.38632	6.06654
LOC100221168	3.08382	3.26531	4.27416	3.80536	4.26513	4.26923	4.46443	4.59659	4.3262	3.62575	4.01719	3.99478	4.60258	4.02013	3.83399	3.90339	4.50091	3.98653
TCTN3	5.24874	4.97025	5.84997	5.108	5.62791	5.55582	5.42314	5.9676	5.76292	5.03804	5.41269	5.621	5.6609	5.46119	5.40192	5.86037	5.69442	6.22216
YWHAQ	10.0457	10.0758	9.99093	10.2387	9.83714	10.2194	10.2554	10.2639	10.03	10.224	10.3121	10.3087	10.2424	10.1367	10.0993	10.324	10.1658	10.3544
ARG2	6.89689	6.25393	6.67575	6.15132	6.96525	6.85659	6.54957	7.68809	7.32666	6.83238	6.34213	7.09175	7.42417	6.71926	7.17762	7.17488	6.96603	7.71616
LOC100225934	2.43312	2.56646	2.06457	2.41308	2.90656	2.82349	2.75396	2.78315	3.03471	3.41408	2.33794	2.54345	2.90413	3.53719	2.52468	2.8582	2.86011	3.3764
LOC105759448	6.57888	6.94546	6.51947	7.26477	6.88221	7.15798	7.1935	7.20401	6.97172	7.12424	7.24582	7.04797	7.13184	7.00317	6.65493	7.32181	7.05279	7.29546
PEX7	4.87023	4.99501	5.06455	5.20464	4.94356	5.2508	5.23072	5.18482	4.9385	4.8711	5.14984	5.39207	4.91972	5.21849	5.13176	5.27612	5.18467	5.52868
SLC25A13	6.31914	6.50699	6.52837	6.66736	6.42377	6.78101	6.70788	7.02297	6.41941	6.79781	6.78857	6.92296	6.69957	6.53306	6.50651	6.68594	6.58896	7.11398
PRMT9	4.8969	4.89748	4.74859	4.83779	4.74059	4.98316	4.85501	4.97017	5.00095	4.93466	4.98607	4.8547	5.1565	5.23415	4.84147	5.00721	4.93786	5.30749
RASA3	4.07447	4.30611	4.16192	4.31822	4.32978	4.14584	4.37716	4.31672	4.31452	4.46721	4.52699	4.42272	4.3357	4.46539	4.07865	4.45944	4.35129	4.52876
UCHL1	7.46703	7.61189	7.70797	NA	7.76568	7.81828	7.5066	7.57095	8.01541	7.71347	7.66169	7.88308	7.58358	7.89148	7.6869	7.73624	7.93592	7.99038
BTF3L4	5.32006	5.36591	5.14474	5.52272	5.57503	5.76945	5.54641	5.37522	5.67114	5.66353	5.52075	5.43914	5.77513	5.87273	5.24963	5.55886	5.57841	5.75153
CENPU	3.67347	3.67228	4.4225	4.37427	3.86902	3.61878	4.01416	4.15315	3.84529	3.94785	4.58374	4.4528	3.92546	4.09056	4.34734	4.824	4.32592	4.73298
NDFIP2	5.81429	6.42905	6.2462	6.85215	6.23597	6.74602	6.98503	7.08728	6.59464	6.6036	6.90906	6.36048	6.92902	6.73135	5.94672	6.87056	6.69789	7.23988
TMEM170B	5.76398	5.18637	5.72682	5.6343	5.75502	6.0092	6.27105	6.57221	6.2329	5.4938	6.42694	5.98756	5.82917	6.15128	5.3644	5.88121	6.47842	6.42305
WASL	6.35322	6.33369	6.47494	6.42551	6.34968	6.42065	6.71738	6.43702	6.55669	6.55336	6.8065	6.45804	6.61213	6.30436	6.31783	6.67726	6.68031	6.77305
LOC105759029	1.52557	1.6474	2.63621	1.05241	3.08146	3.22175	2.73039	3.69	2.3717	2.27118	3.36814	2.68571	2.48395	1.70685	NA	2.27881	2.8281	3.55229
MMADHC	6.28033	6.54264	6.55646	6.41267	6.41054	6.6232	6.49261	6.71172	6.60272	6.54919	6.3668	6.74643	6.82037	6.73033	6.47586	6.52923	6.56124	6.84891
PRIM2	1.95817	1.91944	2.95447	2.52418	1.85271	2.32315	2.61478	2.52839	2.4037	2.53377	2.50938	2.30893	3.0629	2.72557	2.51281	2.27222	2.65307	3.1676
LOC105758667	5.38102	5.77129	5.64085	5.77978	5.79144	6.17375	6.08569	6.78894	5.95123	6.49463	6.10194	6.1541	6.00338	5.82682	5.61239	6.04475	6.09003	6.31954
SUCLG1	7.07021	7.15566	7.18366	7.19677	7.18731	7.38714	7.29788	7.16554	7.31434	7.32786	7.26799	7.20689	7.33603	7.35769	7.19207	7.155	7.12661	7.53698
CNEP1R1	4.3661	4.8677	4.70583	4.87909	4.52423	4.98044	4.91608	5.04886	4.74453	5.26007	4.93686	5.0676	4.94049	4.92638	4.50996	4.99608	4.93001	5.27081
DCUN1D5	6.4265	6.45955	NA	6.52843	6.39724	6.71026	6.64579	6.71792	6.69164	6.64616	6.6911	6.82793	6.77117	6.77635	6.25052	6.78415	6.52067	6.97539
LOC100225641	5.36424	5.23325	5.33664	5.30741	5.23277	5.45398	5.47703	5.35895	5.25739	5.12165	5.39567	5.48771	5.39916	5.26474	5.57617	5.41082	5.68565	5.9387
UXS1	5.44232	5.00161	4.98089	5.1691	4.93205	5.62856	5.83434	5.76046	5.60871	5.51744	5.48313	5.40418	5.55826	5.50501	5.1857	5.64546	5.21216	5.97212
C1AH22orf23	3.50202	2.75457	2.9525	2.87656	3.35775	3.77817	3.28797	4.0178	3.28439	3.4352	3.2785	3.41362	3.28985	3.31574	3.92536	3.37926	3.27193	4.05421
DCUN1D4	5.68192	6.02178	5.8763	6.17491	5.71675	6.26682	6.33122	6.63642	6.02756	6.25	6.24636	6.14615	6.05755	5.97825	5.8138	6.39193	6.27249	6.62111
LOC100224161	2.46538	2.59873	2.57075	2.93705	2.49291	3.12321	3.35108	3.22536	3.14993	3.39249	3.3454	3.03913	3.16005	3.0718	2.42214	3.44308	3.16953	2.81715
LOC100225866	2.09729	2.08771	2.50352	1.91629	2.4782	2.36824	2.54991	2.64293	2.76708	2.25243	2.7767	2.17446	2.94211	2.91376	2.35538	2.18413	2.30621	3.1335
LOC100228221	5.29941	5.22452	5.17272	5.93751	4.95945	5.39281	5.62572	5.98438	5.63754	5.70082	5.74748	5.31908	5.6706	5.47198	5.51633	5.61474	5.64854	6.31282
LOC101234257	1.25701	1.55602	2.13545	1.1281	2.09051	2.64272	2.21877	3.19827	2.76264	1.92802	2.58353	1.27959	2.77564	2.82756	1.85919	2.61495	1.83575	2.78826
RTTN	1.98203	2.02461	2.2151	1.92801	2.14064	2.38505	2.30967	2.76127	2.06483	2.00121	2.14386	2.32023	2.30535	1.94282	2.43458	2.39714	2.29818	2.72275
BNIP3	8.77535	8.77049	8.95159	8.82688	9.1472	8.92696	8.98077	9.33828	9.12147	8.77778	8.96465	9.14008	9.07043	9.05887	8.62951	9.15715	9.17782	9.42947
HIAT1	5.98273	6.3934	6.07602	6.56537	6.19491	6.46568	6.50949	6.57966	6.39217	6.56385	6.53436	6.74218	6.48667	6.5148	6.12567	6.36166	6.3155	6.92138
BRE	6.52479	6.39723	6.40371	6.62193	6.23406	6.55989	6.53968	6.4937	6.36747	6.42338	6.98469	6.70068	6.57914	6.40771	6.65848	6.91255	6.7253	6.96514
LOC100221697	6.40161	6.38895	6.28912	6.59923	6.33585	6.50272	6.54018	NA	6.41538	6.63217	6.68391	6.56253	6.47237	6.51949	6.46946	6.60524	6.49025	NA
TGFB2	3.63757	3.91094	4.129	4.13346	4.1536	4.52948	4.10176	4.65198	4.16976	3.86799	4.53041	4.26883	3.87649	3.96552	4.57386	4.1819	4.04439	4.8409
CNIH1	7.62746	7.88599	7.67976	7.80669	8.10427	7.82547	7.7265	7.85166	7.94912	7.93876	7.88793	7.83454	7.91946	7.84677	7.87844	7.86839	7.87908	8.26323
LOC100222081	3.31149	3.28065	3.6267	3.1976	2.98528	3.66931	3.52472	3.828	3.75349	3.37015	3.46952	3.64327	3.89113	3.50036	3.5041	3.62519	3.44265	3.96542
LOC101233748	6.21586	6.6451	6.17948	6.8663	6.31349	6.8852	7.03695	6.91466	6.26654	6.73603	7.21716	6.66841	6.81168	6.81402	6.6065	7.55429	7.03517	6.76536
PEX2	3.12002	3.99119	3.74826	4.1001	3.77921	3.56566	3.76112	4.09615	3.67355	3.94315	4.27637	3.95293	4.0053	3.75362	4.07174	4.47982	3.76472	4.37939
TBK1	4.44182	3.94005	4.36485	4.18506	4.41636	4.5485	4.5757	4.41228	4.39435	4.24395	4.56199	4.49334	4.63825	4.12567	4.32305	4.76079	4.49743	4.59356
PPAPDC2	5.71182	6.02555	5.51321	5.75337	5.94874	5.85484	5.87342	5.65756	6.03855	6.43111	5.95002	6.20055	6.49214	6.32103	5.77694	5.85245	6.21543	6.50917
RPL30	7.42124	7.80968	7.38662	7.45415	7.82698	7.65181	7.73973	7.57929	8.05728	7.82423	7.69749	7.80207	7.90505	8.04966	7.50014	7.94037	7.6552	8.09775
DUSP16	3.09483	3.07186	3.19816	2.91578	3.41908	3.13323	3.29455	3.23409	3.49072	3.66394	3.27375	3.3004	3.5096	3.59392	2.98171	3.07278	3.46678	3.94035
SLC18B1	3.82947	3.17753	3.80404	3.44629	4.14342	4.22435	3.60645	4.27256	4.29151	4.36116	4.22387	3.56314	4.08804	4.20943	3.83441	3.71105	3.93397	4.45016
NSL1	5.12398	5.60874	5.40518	5.73167	5.32901	5.62728	5.44533	5.62531	5.45598	5.63604	5.61328	5.84648	5.79186	5.83992	5.22919	5.64754	5.639	6.13068
FSBP	2.99502	3.16652	3.4368	3.45756	3.23018	3.49185	3.67333	3.44669	3.14379	3.57407	3.81215	3.42012	3.4738	3.33376	3.14217	3.46242	3.34702	3.96198
SYNPR	8.32005	8.46715	8.57947	8.62586	8.37273	8.76029	8.88669	9.22116	8.56757	8.47211	8.93681	8.76733	8.85213	8.91961	8.09551	8.81877	9.04688	9.23706
ALG8	3.90698	4.22596	4.76704	4.12774	4.75064	4.52759	4.24223	4.3953	4.50232	4.77266	4.23673	4.53855	4.20818	4.64879	4.81736	4.50784	4.65675	4.82978
FAM3C	6.03408	5.87653	5.96056	6.10723	5.86166	6.37702	6.0863	6.64076	5.93726	6.42641	6.32801	6.42248	6.0862	5.76644	6.07731	6.39317	6.42823	6.70878
FAN1	3.44656	3.27637	3.71895	3.50952	3.91879	3.55957	3.58959	3.67548	3.43739	3.52658	3.73316	4.02998	3.63232	3.27285	3.6159	3.80319	3.84692	4.37789
TMEM30A	7.95872	8.04647	8.36718	8.26696	8.02522	8.12892	8.19912	8.07974	8.0246	8.14944	8.46544	8.46878	8.14504	8.18345	8.19264	8.40717	8.23937	8.67827
AGTPBP1	5.99509	5.93932	5.8639	6.10481	5.93075	6.13298	6.02402	6.19968	6.03359	6.20195	6.36616	6.11992	6.01441	6.0639	5.89502	6.47148	6.30716	NA
LOC100230048	7.61211	8.0499	8.29042	7.87578	7.9702	8.40764	8.11231	8.26405	8.35041	8.17174	8.02987	8.34318	8.60376	8.35694	8.21818	8.32677	7.89088	8.27311
MSMO1	7.28632	6.58591	6.95254	7.08124	6.81782	7.14293	7.29549	7.17019	7.0505	7.19907	7.25237	7.34577	7.09992	7.03012	6.934	7.3127	7.36191	7.34327
ZMYM2	4.83912	4.88822	4.96977	5.06083	5.0463	5.36312	5.18154	5.17838	5.04458	5.13306	5.08425	5.20389	4.99562	4.94913	4.87595	5.07825	5.04584	5.51955
EIF2B3	6.27652	6.20113	6.19145	6.14953	6.12432	6.41442	6.26469	6.31878	6.65931	6.57653	6.4176	6.41809	6.19802	6.52409	6.59541	6.19868	6.34856	6.59713
FAM110B	6.05286	6.36538	NA	6.49894	6.29321	6.6793	6.50223	6.34311	6.55028	6.34168	6.49107	6.52349	6.31023	6.65832	6.15835	6.47721	6.55528	6.76436
CRIPT	6.14058	6.31776	6.22134	6.30261	6.45785	6.07384	6.29934	6.25829	6.21462	6.5149	6.84104	6.54624	6.58489	6.22558	6.37375	6.5565	6.38132	6.74458
LOC105758806	0.137304	2.70848	0.0157876	2.68252	3.95965	2.79297	2.66623	3.42353	3.44208	2.59493	2.90936	3.57725	3.37127	3.73586	3.18574	1.26266	2.89883	3.03275
MBIP	6.60863	6.48266	6.62479	6.5498	6.46388	6.67637	6.61564	6.98477	6.5844	6.58724	6.82846	6.8262	6.65104	6.49719	6.71012	6.84632	6.6111	7.05798
AAMP	6.74238	6.83954	6.99989	6.92744	7.0221	7.18008	6.99441	7.08995	7.00423	6.97206	7.01761	6.994	7.05647	6.93598	6.9458	6.80176	6.95001	7.40392
COPS8	7.52776	7.69333	7.76252	7.65105	7.51576	7.79691	7.77479	7.515	7.72925	7.90714	7.80554	7.75791	7.74129	7.82823	7.71011	7.63816	7.7921	8.11878
PRDX4	7.69003	7.4531	8.0077	7.33366	7.68947	7.76369	7.61824	7.83882	7.80461	7.80853	7.6778	7.66735	7.90661	7.93396	7.98937	7.58914	7.96716	8.24369
GEMIN5	NA	5.37618	5.13782	5.21757	5.56389	5.37265	5.42012	5.31438	5.47357	5.41069	5.53105	5.459	5.37059	5.42114	5.58049	5.29037	5.3717	5.69057
LOC101233955	5.61744	5.99385	6.10024	6.40857	5.96536	6.10879	6.00792	6.29551	6.20648	6.29448	5.90341	6.42397	6.20959	6.24476	5.92388	6.2741	6.04078	6.65805
CFL2	6.19578	6.15863	6.3786	6.1616	6.14515	6.32223	6.33373	6.35817	6.27449	6.4616	6.46548	6.40796	6.18957	6.06468	6.27293	6.45884	6.42232	6.66656
LOC100225556	4.57094	4.46005	3.30437	4.38982	4.03328	4.17123	4.95398	4.82535	5.49801	4.89506	4.01513	4.95508	4.99117	5.71196	4.46727	5.15743	5.14625	5.12551
RAB23	3.14639	3.49255	3.40371	3.131	3.20046	3.59234	3.58668	3.67915	3.45665	3.54141	3.79751	3.73828	3.64456	3.62162	2.94999	3.75543	3.66995	3.85331
VSNL1	8.16827	8.35074	8.41585	8.69741	8.19305	8.48747	8.59329	8.73698	8.53102	8.92791	9.04991	8.66808	8.57158	8.36151	8.11252	8.73661	9.00892	8.93392
C1AH7orf55	5.19506	5.14792	4.97603	5.34315	4.77057	5.43435	5.13518	5.5454	5.59491	4.95297	5.36876	5.74787	5.72934	5.72771	5.12763	5.10635	5.74626	5.92222
LOC100231693	4.99365	5.32768	6.11329	5.87229	5.28262	5.83201	5.86802	6.13984	5.47886	5.55768	6.01719	5.60281	5.88118	5.54245	6.08183	6.26871	5.51993	6.14009
SELT	8.7419	8.63789	8.59019	8.63881	8.57313	8.64455	8.66425	8.95221	8.69113	8.80243	8.66655	8.97006	8.66545	8.7913	8.73819	8.90436	8.73562	9.01806
EXOC2	4.90543	5.24665	5.35574	5.30132	5.16276	5.49453	5.43067	5.37854	5.16501	5.34069	5.46896	5.58849	5.60859	5.21235	4.95683	5.58266	5.4088	5.62384
PHF6	4.84107	4.93749	4.96588	5.1427	4.87612	5.09062	5.07233	5.28088	4.90363	5.03903	5.17733	5.24736	4.99041	4.90664	4.95727	5.235	5.02855	5.38773
RTN4	9.37738	9.41244	9.72818	9.63003	9.60945	9.67837	9.67843	9.68347	9.51691	9.65401	9.8424	9.7252	9.62739	9.42731	9.49668	9.57973	9.71266	9.94432
TMEM55A	6.08682	6.05779	6.15643	6.49057	5.91702	6.81327	6.52526	6.32017	6.09834	6.37902	6.46205	6.20795	6.6209	6.27103	6.26652	6.51755	6.25947	6.79672
WDR37	4.77243	4.9632	4.76136	4.91133	4.77707	4.97492	5.0061	5.02059	5.01343	4.99438	5.06294	5.08353	5.15039	5.111	4.62211	4.92893	5.06202	5.31526
BIRC2	6.23063	6.23234	6.17698	6.31612	6.32495	6.43341	6.38572	6.60872	6.38745	6.16421	6.38373	6.3303	6.39434	6.28712	6.38055	6.48593	6.33761	NA
LOC100232370	0.477413	0.60571	1.34648	0.422413	1.53225	1.47913	1.82326	1.67795	1.81104	0.75711	1.17635	0.965927	1.49068	1.05935	1.03381	1.31307	1.01381	1.84098
LOC100232387	0.137304	0.0196497	3.06549	0.0222987	2.45846	3.47851	3.02593	2.71302	2.30647	0.137343	2.28436	0.614293	1.98042	3.00615	3.09799	3.0092	2.14075	2.46942
SRD5A3	3.35969	3.80762	3.70106	4.05513	3.93691	4.50421	4.03965	4.40554	3.95468	3.57234	4.23547	4.15656	3.87415	3.67066	3.87126	3.93732	4.05512	4.61953
USP3	4.83381	5.10244	5.09198	5.15241	4.87893	5.04995	5.19986	5.14844	4.98527	5.10344	5.18482	5.03157	5.13177	4.94362	5.10173	5.25405	5.1466	5.51772
ADAT1	4.16998	3.9542	4.08113	4.13516	4.11244	4.24096	4.16639	4.34128	4.1284	4.02269	4.50726	4.20344	4.16844	4.2399	4.28304	4.12144	4.10393	4.47363
CCDC177	4.99543	4.07023	4.64469	4.37692	4.85041	4.94604	4.75057	5.12795	4.87833	4.76691	5.10346	4.6434	4.80425	4.30832	4.92302	4.90908	5.17429	5.30096
GPR27	6.47753	6.82184	6.68574	6.88414	6.46775	6.87809	6.88283	6.79791	6.76126	6.72495	6.83353	6.79728	7.11081	7.0482	6.7756	6.76993	6.69939	7.20082
LOC105759527	3.77557	4.47672	4.35735	4.98267	4.6472	4.68862	4.55972	5.08732	4.45883	4.98435	4.98364	5.01607	4.50306	4.15445	4.61731	4.81577	4.86263	4.86373
MPC1	8.49858	8.55913	8.51019	8.58902	8.26201	8.71476	8.69479	9.03864	8.55448	8.6725	8.74202	8.88886	8.60969	8.46661	8.71384	8.87293	8.6638	8.94962
YME1L1	6.55562	6.30393	6.39675	6.4354	6.18384	6.54216	6.50156	6.67781	6.49286	6.50488	6.65417	6.61164	6.51829	6.43265	6.49269	6.58389	6.50701	6.73814
CCDC6	4.75987	4.82688	5.33001	5.10732	5.07561	5.13739	5.05035	5.36903	5.19255	5.17361	5.1902	5.11245	5.33728	4.74816	4.85725	5.29353	5.38496	5.60342
LOC100190438	NA	8.11867	7.64074	8.36053	7.5475	8.29587	8.45222	8.7708	7.78401	8.50283	8.6731	8.52919	8.25309	8.17911	NA	8.28128	8.48418	8.76763
LOC105758585	3.19985	2.84459	3.3127	3.03047	3.10629	3.26151	3.46789	3.93924	3.38034	2.64676	3.82626	3.85705	3.35413	3.18015	3.08169	3.57097	3.57032	4.0588
LOC105759419	3.09721	4.00515	3.26986	4.09255	3.70472	3.9601	4.25598	4.10173	3.33417	3.94694	4.06527	3.87775	3.82773	4.00513	3.47679	4.0819	4.37376	4.37891
HACD3	6.44408	6.42528	6.57436	6.64323	6.84312	6.8542	6.85531	6.82822	6.47257	6.83352	6.87806	6.78789	6.75026	6.76216	6.43553	6.81927	6.48315	6.98781
NIPA2	6.29095	6.5959	6.06327	6.61754	6.56999	6.72489	6.6527	6.44595	6.56162	7.20931	6.81998	6.62438	6.77352	6.77257	6.42705	6.60951	6.58179	6.95434
TALDO1	6.41754	6.55262	6.60933	6.21537	6.75202	6.53111	6.46176	6.44026	6.88417	6.79325	6.59442	6.69598	6.65927	6.85572	6.42986	6.91363	6.64193	6.95943
LOC100220645	0.720363	0.977321	1.59392	1.33697	1.71754	1.95324	1.37268	1.81499	0.672558	1.81049	1.50374	2.44593	1.4981	1.49534	0.928582	1.59716	1.52393	2.91638
MRPS18C	5.07023	5.48992	5.168	5.00562	5.51543	5.50709	5.28852	5.90274	5.55449	5.564	5.31029	5.81157	5.38022	5.49785	5.56395	5.48492	5.44977	5.60425
HMGN3	6.8211	7.30161	6.89659	7.52792	7.16011	7.21309	7.60102	7.87026	7.14887	7.43029	7.71797	7.55012	7.29712	7.3768	7.03501	7.80407	7.4107	7.56274
KATNBL1	3.88863	4.11776	3.8262	4.15993	3.92162	4.27246	4.38698	4.38888	4.0415	4.44946	4.16873	4.28646	4.18043	3.95927	3.91021	4.37503	4.29399	4.44974
LOC100227536	7.10119	7.48188	7.23952	7.69586	7.24327	7.5328	7.48856	7.47071	7.22962	7.48152	7.64966	7.24694	7.7105	7.38146	7.31397	7.63028	7.69229	8.02852
LOC105758967	7.27927	7.23342	6.97333	7.49118	6.98111	7.77187	7.59597	7.45921	7.43004	7.44097	7.62439	7.61066	7.41385	7.44841	7.17653	7.51463	7.42233	7.6812
MCOLN3	5.14493	5.0539	5.37615	5.11896	5.18314	5.44624	5.35707	5.74535	4.95932	5.40122	5.51692	5.27056	5.40947	5.21509	5.17397	5.60357	5.30829	5.83965
WDR78	0.887584	1.13908	1.33091	1.04694	1.16343	1.13382	1.53531	1.66646	1.86432	1.26417	1.33187	1.6142	1.30125	1.70017	1.29367	0.972957	1.16741	2.15436
HS6ST2	7.5518	7.49226	7.61499	7.5949	NA	7.74381	7.80791	7.67782	7.57407	7.2417	7.71953	7.92168	7.78424	7.61942	7.65656	7.77025	7.71586	7.9824
MPPE1	5.60726	5.92461	6.13056	6.24214	6.04943	5.68565	6.01458	6.08574	6.0434	6.03193	6.28285	6.25264	5.95271	5.82376	6.17452	6.30117	6.06709	6.48261
TEN1	3.35464	3.05935	3.77415	3.20095	3.16275	4.07312	3.60331	4.237	3.6553	3.83652	3.51343	3.49387	3.63396	3.50546	3.81455	3.631	3.75436	3.80425
TMEM65	6.11782	6.40324	6.30718	6.48944	6.07395	6.54008	6.53122	6.61076	6.33388	6.50033	6.61028	6.50368	6.52325	6.38025	6.04154	6.7892	6.6331	6.79303
BRCC3	4.79924	5.12418	5.10915	5.01517	5.11439	5.08365	4.81611	5.51031	5.13093	5.16655	5.1289	5.47161	5.16604	5.29498	5.08314	5.11492	5.16285	5.50658
CUTA	1.39703	2.34107	1.80311	2.75489	3.3819	3.03227	2.00388	2.84455	2.89208	3.80681	3.23475	4.18758	2.91199	3.56771	2.02294	2.25952	2.76151	3.34562
FITM2	3.99446	4.37353	4.22856	4.17727	4.35707	4.5341	4.30796	4.13297	4.55922	4.49581	4.24371	4.41261	4.27945	4.39271	4.27789	4.44357	4.52642	NA
HVCN1	5.53835	5.69678	6.9045	6.04865	6.24333	6.62929	6.60099	7.47949	6.224	5.66427	6.50671	6.69643	6.53871	6.52836	6.94432	6.79174	6.36873	6.50322
LZTFL1	4.39072	4.82075	4.78027	4.88424	4.89885	4.92276	4.92531	5.30898	4.75979	4.74231	5.13946	4.63175	4.97174	4.69673	4.70392	4.85872	5.17651	5.469
YEATS2	5.25144	5.17872	5.23909	5.276	5.08076	5.46665	5.32662	5.43648	5.26215	5.38458	5.30571	5.36043	5.3702	5.19191	5.30071	5.29107	5.2877	5.78076
MED28	NA	5.91943	NA	6.03812	6.24896	6.38095	6.26267	6.49327	6.17724	6.22306	6.38017	6.57476	6.29311	6.19373	5.94039	6.65689	6.14792	6.4334
FLVCR2	0.816748	0.531522	1.24055	0.839216	1.50324	1.08756	1.48644	1.28939	1.09023	1.26417	1.08052	1.24662	1.15246	1.18646	1.05581	0.91837	0.903339	1.62679
LOC100221041	1.75947	1.52805	2.06391	1.87184	2.07232	2.23723	2.12269	2.21177	1.80974	2.4075	2.06917	1.53885	2.0432	NA	1.9682	1.84871	2.22164	2.50386
LOC100223410	4.53353	4.28527	4.66241	4.56651	4.89106	4.51446	4.68712	4.63811	4.69989	4.54661	4.89832	5.04499	4.48685	4.61282	4.39739	4.95533	4.80516	4.94406
CUL2	5.55947	5.4036	5.44128	5.62942	5.46338	5.66716	5.71509	5.82549	5.61071	5.56781	5.63486	5.74641	5.43721	5.44026	5.61212	5.68153	5.64059	5.82789
NEIL1	2.60403	3.13064	3.3428	2.97422	4.01025	3.19999	3.18897	3.43435	3.18176	3.59478	2.96931	3.24414	3.74371	3.47952	3.59143	2.90364	3.74601	3.93487
RPE	5.94632	6.22685	6.3652	5.94819	6.29361	6.39353	6.16172	6.63475	6.51724	6.39582	6.28983	6.49578	6.14281	6.44662	6.17964	6.25214	6.2795	6.71003
MOSPD1	6.01278	6.15383	6.25373	6.24888	6.0783	6.31457	6.23942	6.60639	6.12657	6.17641	6.26772	6.43431	6.39153	6.06559	6.2157	6.32291	6.28927	6.55974
WNK2	5.53166	5.44081	5.54266	5.63255	5.5766	5.6342	5.64423	5.73354	5.53943	5.57086	5.56496	5.53434	5.56518	NA	5.50002	5.57651	5.64465	5.82422
ANKRD46	6.17983	6.61951	6.23753	6.76865	6.23781	6.80327	6.89219	6.95627	6.48687	6.78162	6.95598	6.6233	6.92136	6.62558	6.13416	6.89568	6.69458	7.13403
CETN2	6.50863	6.29962	6.4198	6.20916	6.57892	6.53166	6.47588	6.62682	6.76637	6.71569	6.85905	6.74035	6.64218	6.55556	6.85874	6.20199	6.46019	6.90318
LOC100224152	6.09725	6.27713	6.2726	6.32328	6.16806	6.44498	6.34983	6.75782	6.27291	6.29255	6.41461	6.55104	6.29578	6.29087	6.24373	6.35954	6.33199	6.82987
RAP1B	5.85435	6.32274	5.90704	6.30738	5.87429	6.27097	6.23414	6.17276	6.18678	6.41448	6.31359	6.1986	6.2546	6.35195	6.03704	6.38224	6.20868	6.47155
SDR39U1	4.45033	4.8294	5.25918	4.84923	5.35753	5.3818	5.40391	5.64375	5.66816	5.98587	5.78998	5.21058	6.03443	5.74221	4.97935	4.61664	5.39774	5.44733
MCTS1	7.1618	7.27851	6.98031	7.39082	7.1115	7.32724	7.23943	7.37055	7.33158	7.59092	7.39977	7.64897	7.32478	7.48398	7.00521	7.55085	7.29104	7.69821
OGFRL1	4.45475	4.57268	4.92951	4.83554	4.92327	4.90268	5.02761	4.92463	4.69694	4.69088	5.32601	4.64444	4.62402	4.77689	4.75526	5.02831	5.20064	5.0578
POLR1C	5.17038	5.50982	4.96148	4.93099	5.42702	5.40296	5.24042	5.23201	5.49992	5.668	5.49151	5.50648	5.38562	5.92765	5.32225	5.42654	5.3962	5.71137
SLC39A6	5.63949	5.77412	5.73363	5.98515	5.7897	6.45506	6.25196	5.8816	5.90632	5.93616	6.36359	6.03702	5.96461	5.89811	5.70618	6.07809	5.85075	6.40824
AASDH	3.47144	2.96428	3.72676	3.4586	4.20978	4.02823	3.90073	4.61864	3.98859	3.39919	3.97637	3.82605	3.8969	3.17683	4.24633	4.07692	3.71117	4.10918
BCKDHB	5.93074	5.68255	5.81357	5.80972	5.61394	6.21718	6.26638	6.46386	6.0125	5.94408	6.22507	6.18077	5.84395	6.09607	5.64153	6.40657	6.01949	6.36716
MRPS22	6.31774	6.4601	6.48892	6.40449	6.53993	6.50783	6.41453	6.64551	6.64276	6.55721	6.51302	6.67241	6.69292	6.57787	6.48907	6.32786	6.42745	6.91319
ADGRD1	0.882004	0.848596	1.62754	0.660866	0.603845	1.57575	1.18749	1.88742	1.74799	0.948522	1.7819	1.91441	1.73489	1.84418	1.39471	1.41243	1.14834	1.44752
COG6	7.17228	7.3203	7.33463	7.48292	7.21884	7.47762	7.54737	7.72607	7.35618	7.27273	7.42096	7.3395	7.44064	7.2496	NA	7.53119	7.58895	7.56401
DFFA	3.35187	3.26285	3.48705	3.47735	3.84959	3.39112	3.13096	3.99072	3.88163	3.48621	3.60882	4.0952	3.70723	4.1385	3.6725	3.56148	3.91694	3.63588
DISP2	2.98829	2.7712	2.81888	2.72301	2.83587	2.91462	2.9289	3.30778	2.97116	2.88601	3.06321	3.10166	2.83108	2.68057	3.03641	3.01792	3.18287	3.40671
RRM2B	4.00907	4.24253	5.01367	4.80076	4.45622	4.9217	4.4701	5.00712	4.43032	4.42172	4.70809	4.45938	4.86632	4.5354	4.62745	4.54146	4.85959	5.30588
DUSP7	NA	6.11764	5.97656	6.22989	5.88573	6.35383	6.35746	6.04586	6.25503	6.31142	6.19167	6.36499	6.6285	6.17716	6.33342	6.27135	6.17005	6.36378
LOC105759361	4.815	5.22075	4.98264	5.43348	5.05026	5.51863	5.42841	5.42242	5.30806	5.44597	5.38215	5.38468	5.52507	5.04084	5.01569	5.22807	5.27547	5.61164
LOC100231733	2.3603	2.88588	2.82008	3.11324	2.71995	3.50901	3.11136	3.69273	3.07325	3.63111	3.29054	3.08336	3.21609	2.86778	3.08025	2.54915	3.07777	3.80869
LOC105759377	2.42151	1.20431	2.53906	0.857496	2.44037	2.89039	2.67588	3.27435	2.32066	2.07167	2.25564	2.90451	2.43109	1.66661	1.9647	2.97134	2.63774	3.89282
TOPBP1	2.97133	2.91538	3.39032	3.3498	2.77488	3.60611	3.54397	3.52393	3.03628	3.22233	3.54645	3.00384	3.38749	3.45613	3.16103	3.27817	3.29316	3.90296
C1AH12orf66	4.45891	3.99408	4.08608	4.201	4.0547	4.49932	4.25331	4.29917	4.32353	4.14118	4.38261	4.19135	4.57746	4.32018	4.22683	4.26555	4.42749	4.86083
LOC100220037	0.68654	1.83717	1.37314	1.12158	0.590952	1.62712	1.62773	1.55866	1.1377	2.35201	1.76516	1.47433	1.91728	2.09513	0.881482	2.2779	2.29067	2.14985
LOC100228351	NA	5.93856	5.64143	6.0815	5.72531	5.97242	6.3061	5.98384	5.94789	5.8408	6.24744	6.17292	5.92391	6.09	6.05723	6.31201	6.10075	6.07287
PKIB	5.05788	4.90755	4.89249	5.12117	4.78351	4.9448	5.19455	5.49299	5.1426	NA	5.33994	5.39486	5.04717	5.12146	4.97268	5.70288	5.00684	5.45473
USP15	5.57164	5.73508	5.65945	5.76236	5.52501	5.9441	5.94345	5.91319	5.70266	5.79307	5.77409	5.88598	5.77061	5.70874	5.54758	6.05406	5.75599	6.16421
ZBTB18	4.53993	4.6069	4.6426	4.69431	4.34272	4.53303	4.80034	4.71795	4.85593	4.50659	4.72352	4.86022	4.65673	4.9142	4.61926	4.9655	NA	4.83072
ARGLU1	7.49867	7.6334	7.63955	7.92177	7.50639	7.90517	7.86482	NA	7.67306	7.71644	7.92479	8.04979	7.7284	7.44966	7.54459	8.07421	7.93076	8.13539
KCNS2	5.70281	6.01025	6.55174	6.03839	6.44365	6.76026	6.67207	6.32397	6.2607	6.12868	6.45536	5.86515	6.67021	6.55949	6.04658	6.23574	6.64068	6.75312
TMEM192	3.75022	4.20241	4.58226	4.31652	4.02339	4.19859	4.21646	4.41396	4.08742	4.15127	4.39868	4.36346	4.14217	4.42765	4.21864	4.39532	4.31954	5.0587
WHAMM	4.3858	3.95977	4.05093	4.48626	3.92579	4.4594	4.51666	4.35767	4.07699	4.31199	4.48067	4.47313	4.18805	4.28342	4.40671	4.5657	4.25052	4.7764
BMPR1A	3.99749	3.83188	4.23874	4.03189	3.81542	4.02673	4.21975	4.17832	4.08044	4.02396	4.43304	4.18279	3.94044	4.33919	3.78882	4.37533	4.19406	4.66329
GALNT1	6.92653	6.82984	6.93352	7.01451	6.71937	6.89696	7.32898	7.28156	7.13689	6.91473	7.37933	7.00005	7.09183	6.90513	6.73899	7.18987	7.17837	7.65534
LOC100219663	1.45576	1.31011	2.25021	1.54116	2.33277	2.41753	2.36496	2.10129	2.07143	2.17688	1.89746	1.88063	2.44249	2.8988	2.00385	2.17456	1.1929	2.85649
LOC105758604	5.21224	5.35807	5.65832	5.51442	5.99638	5.50012	5.71172	6.36007	5.72595	5.31537	5.92142	5.90037	5.85888	5.36741	5.55005	5.56772	5.86164	6.22974
CCRN4L	2.01085	2.17691	3.11071	2.06498	2.50571	2.20144	3.23964	2.282	2.49551	2.81631	2.28234	2.9603	2.92942	3.73186	2.63035	2.78813	2.30286	3.59264
DESI2	5.29798	5.64124	5.62224	5.58334	5.30993	5.78175	5.58249	5.85675	5.72633	5.68519	5.63227	5.6477	5.6982	5.48679	5.5933	5.53405	5.68027	6.19104
TBC1D2B	4.43561	4.20767	5.09837	4.5566	4.16176	4.74129	4.64245	5.21851	4.36135	4.5573	4.65225	5.01216	4.61787	4.51391	4.6012	5.01964	5.19445	5.29972
LAPTM4A	8.97127	9.05608	8.99561	9.38066	9.04961	9.17669	9.26917	9.27036	9.05208	9.22119	9.30774	9.27791	9.10869	9.2377	8.97101	9.30631	9.39447	NA
PBLD	2.96655	2.48386	2.86284	2.39606	2.43437	3.14585	3.294	3.11968	3.63688	2.83467	2.80625	2.86198	3.5784	2.81966	2.92992	2.91932	2.83571	4.04218
PSMD10	5.63539	6.08223	5.71045	6.07843	6.23939	6.22957	6.08302	6.17192	6.08253	6.23206	6.43227	6.09918	6.03251	6.54173	5.46763	6.16147	6.25005	6.69596
SLC38A4	0.494293	0.344699	2.02366	0.317575	1.65896	1.73889	1.29296	1.27504	1.00149	1.51274	1.19961	1.24979	1.14754	1.77283	1.05934	1.14696	1.20324	1.93979
TUBGCP4	7.48834	7.50698	7.90259	7.65551	7.63064	7.79133	7.65644	8.28294	7.64937	7.81114	7.78468	7.83619	7.86	7.61408	7.70364	7.71747	7.84777	8.10701
UBE2QL1	7.23456	7.25303	7.00285	7.54706	7.01828	7.60528	7.65388	7.56615	7.28941	7.34344	7.54678	7.63332	7.38732	7.50105	7.04434	7.62936	7.72689	7.57187
IL6R	3.13132	3.34996	3.25806	3.43892	3.40816	4.0334	3.35511	3.75342	4.22129	4.02685	3.63088	3.96738	3.56762	3.75238	3.2277	3.50517	3.66011	3.73099
KIAA1456	7.05014	7.07207	7.44391	7.11604	7.23754	7.14951	7.43173	7.46004	7.25299	7.44722	7.33056	7.10201	7.48544	7.43678	7.14938	7.21706	7.22505	7.72426
LOC100219374	4.09433	3.85983	3.78811	4.0453	4.03527	4.07871	4.26603	4.11154	4.07083	4.08426	NA	4.12383	4.17863	3.9678	3.79475	4.10221	4.16453	4.4305
LOC105759477	1.41529	2.10723	2.91696	2.32259	2.43253	2.59456	2.30869	3.32234	2.599	2.80014	2.70863	2.96783	2.27418	2.50221	2.11182	1.99875	2.66266	3.61349
SIRT1	5.17969	5.13016	5.50464	5.44499	5.19339	5.59122	5.69077	5.49654	5.22537	5.29113	5.64265	5.38342	5.43559	5.07557	5.30955	5.54255	5.53243	6.05777
TOMM5	5.81903	6.6256	6.24195	5.87281	6.44057	6.34306	6.8625	6.82715	7.318	6.84418	6.47809	7.06615	7.39655	7.08889	6.02122	6.29322	6.83627	6.89534
ATP13A3	4.40983	4.65804	4.37538	4.81098	4.58082	4.91306	4.80402	4.92156	4.64908	4.84564	4.81739	4.96915	4.7394	4.50678	4.36238	5.11364	4.79524	4.97286
C5H11orf58	7.29598	7.63205	7.68897	7.77728	7.62967	7.86475	7.78225	8.24202	7.5456	7.87529	8.06275	8.05478	7.67592	7.6152	7.42728	7.90729	7.89235	8.06154
GTF3A	4.84065	5.0034	5.30038	5.242	5.36801	5.61585	5.42465	6.08388	5.24741	4.79215	5.34727	5.27968	5.53128	5.00083	5.22995	5.55	5.43381	5.90196
PCCB	5.39189	5.56115	5.84556	5.52527	5.74235	5.60722	5.5027	5.97636	5.9385	5.89997	5.36274	5.8834	5.83492	5.84034	5.73581	5.82349	5.62354	6.0805
RAB2A	8.06494	8.0343	7.9907	8.23325	7.88651	8.18192	8.24058	8.34818	7.97468	8.2286	8.40456	8.25844	8.12921	7.97657	8.10546	8.34378	8.21129	8.41822
LOC105759370	0.840348	1.05083	2.27523	1.65847	0.00956503	2.45335	2.13396	2.39388	1.48528	1.83445	1.95116	1.1823	2.69907	1.87983	1.23759	2.31776	2.26545	2.60752
NEK3	NA	5.44217	6.08795	5.63592	6.18859	6.23225	6.35538	6.93307	6.06019	6.28457	5.98831	6.2317	6.24657	5.53923	6.67216	6.69674	5.72679	6.61245
ANKIB1	5.44647	5.31127	5.54733	5.40804	5.32414	5.68338	5.82096	5.65967	5.68836	5.40787	5.87342	5.54113	5.36008	5.61653	5.25754	5.67914	5.69369	5.98125
C13H5orf24	6.95804	7.20901	6.95422	7.53349	6.96222	7.44744	7.54875	7.61924	7.17581	7.19548	7.51632	7.47855	7.38483	7.14591	6.95467	7.55528	7.47191	7.62855
METTL15	3.12393	2.70366	3.33607	2.74438	3.72745	3.82078	3.6545	3.45698	3.46558	2.76107	3.03277	3.25423	3.23472	3.55838	3.46751	3.26576	3.69639	3.69324
SLC7A6OS	5.63038	5.75279	5.81577	5.70726	5.93302	5.53125	5.81288	5.78125	6.17971	5.73132	6.09022	5.7336	5.8427	5.98046	5.94816	5.80758	5.92333	6.06415
TATDN3	5.50071	5.70574	5.70696	5.90721	5.72726	5.79225	5.60975	6.21066	5.79807	5.83375	5.84158	6.06543	5.94358	5.81489	5.551	5.72132	5.89525	6.27767
TMPO	5.37605	5.6366	5.31491	5.81351	5.33603	5.78969	5.71703	6.19439	5.37856	5.64399	5.92177	6.11344	5.68057	5.44106	5.37204	6.28773	6.0071	6.13764
EFNB2	2.83662	3.06501	3.0999	3.25009	3.22747	3.39217	3.49948	3.28529	3.14785	2.92218	3.37414	2.97984	3.05679	NA	3.17408	3.07142	3.5242	3.55444
BAG2	4.61048	4.58338	4.49008	4.03577	4.70104	4.53265	4.46128	4.78234	5.15088	5.05895	4.74513	4.96126	5.05292	4.81222	4.77056	4.62855	4.69944	4.92556
LOC101233477	3.17892	3.62403	3.58253	3.13593	3.78364	4.4456	3.88058	4.31706	4.52909	2.75861	4.91472	3.47874	4.21144	4.05674	3.89465	3.36351	4.0138	5.11947
N6AMT1	4.37777	4.87534	4.69457	4.45991	4.94241	5.02139	4.81546	NA	4.79617	5.11663	4.62089	4.79476	4.99508	4.83473	4.79325	4.86151	4.61262	5.26636
ATIC	5.66526	5.58733	5.60572	5.48347	5.98522	5.57783	5.41486	5.97307	6.09879	5.99275	6.14794	5.60324	5.91443	5.94795	5.76386	5.71514	5.96252	6.02725
ENTPD7	4.64009	4.86184	4.6749	4.80231	4.71791	4.79454	4.80108	4.97478	5.32468	5.06671	4.94976	4.67795	4.9882	5.14327	4.7572	4.74153	4.89474	5.41634
GTF2A1	5.23931	5.93731	5.65723	6.00946	5.58897	5.96478	6.04425	5.9921	5.75612	5.97871	6.08001	5.93539	6.0522	5.72513	5.39558	6.1168	6.02412	6.20752
LOC100230859	2.70467	2.31167	2.20884	2.07583	2.28305	2.92567	2.86616	2.92072	2.9373	2.10618	2.58891	2.69191	2.94769	1.98517	2.92229	2.67249	2.9363	3.49045
TMEM181	5.52979	5.89125	5.94281	5.80379	5.57221	5.91569	5.94544	6.21427	5.77288	5.76696	5.96525	6.22009	5.78924	5.91122	5.8256	6.14676	5.87346	6.17077
TMEM70	3.20404	3.60926	3.75372	3.66139	3.32036	3.91312	4.17466	4.03017	3.81742	3.86437	4.02872	3.35687	3.84496	3.94903	3.43604	3.43541	4.24552	4.3096
CHPT1	4.03018	NA	4.32257	4.02116	4.04616	4.32555	4.33034	4.13206	4.5596	4.28482	4.01234	4.29091	4.30011	4.40765	4.3325	4.23763	4.09206	4.70489
CUL4A	1.69083	2.09224	2.17426	2.02736	1.87583	2.18613	2.33778	2.36166	2.10401	2.43503	2.40334	2.05777	1.99612	1.87621	1.89311	2.10188	2.40435	2.89199
LOC100227829	3.81378	3.87404	4.29261	4.14249	4.43942	4.556	4.17717	4.81935	4.48032	3.7727	4.71972	4.90135	3.77741	3.66163	4.48835	4.36528	5.19297	4.89303
SLITRK4	4.85341	4.98202	4.42517	5.0329	4.60676	5.19803	5.38191	5.34766	5.17034	5.36917	5.13398	4.98812	5.05119	4.96251	4.75268	5.48888	5.30491	5.2135
SUMF2	4.74814	4.9049	4.5099	4.96878	4.75645	5.04384	5.16703	4.92851	5.37337	4.79524	4.97089	5.04992	5.20227	5.27634	5.11616	4.96291	4.89827	4.93905
HECTD2	7.12275	6.98488	6.26303	7.16887	6.30905	7.71223	7.68555	7.63378	7.22444	7.393	7.23968	7.69228	7.60266	7.11782	7.12357	7.51666	7.17724	7.50032
HIGD2A	NA	6.6724	6.47557	6.69502	6.71681	6.63508	6.8316	6.97779	7.20409	7.11836	6.71735	6.66965	7.19875	6.93215	6.67658	6.70905	6.66404	7.51868
LOC105758984	1.43856	2.72746	1.62614	2.23712	2.4303	1.98798	3.03644	3.22299	2.3717	3.24634	3.01472	3.42805	2.68956	2.37179	2.21865	1.97656	3.29204	2.90935
LOC100220195	3.02195	3.081	4.09281	3.43845	4.21106	4.12395	4.28204	3.57779	4.2727	3.90233	3.46952	3.76892	4.41792	3.98771	4.13916	3.39843	4.1436	3.6774
CXXC5	2.16991	1.89605	2.46564	2.45358	2.39809	2.45575	2.28325	2.64589	2.42183	2.52963	2.61916	2.7345	2.6195	2.22338	2.46065	2.80209	3.09235	2.04848
WEE1	4.95978	4.66513	4.52353	NA	4.76277	4.76961	4.78738	4.84306	5.03943	4.72605	4.69432	4.87363	4.99079	5.20753	4.86616	4.92384	4.91144	5.07416
GTF2H5	7.20509	7.34062	6.9945	7.31928	7.2665	7.47343	7.31021	7.91102	7.26282	7.7937	7.35222	7.37006	7.67732	7.4814	7.17246	7.48308	7.39842	7.8085
LHX8	5.37135	5.3906	5.68339	5.83115	5.91956	5.65462	5.78774	6.15681	5.80775	5.5971	5.88165	5.95101	5.80783	5.61616	5.32298	5.93686	5.68745	6.06893
LOC105760113	3.68474	3.72104	3.66622	3.90431	3.92503	4.6922	4.27234	4.21306	3.43687	3.8041	4.30594	4.76363	3.82881	4.21296	4.14653	4.50509	3.75117	4.3301
PLEKHA3	4.98333	4.87434	5.0239	5.08666	4.89567	5.25325	5.12546	5.47611	4.98444	5.00314	5.26469	5.24852	5.00748	4.85856	5.02109	5.21048	5.11213	5.54771
RBMS1	4.56167	4.56687	4.44178	4.81192	4.61451	4.91477	4.86036	4.73699	4.69849	4.86505	4.77497	5.14561	4.67655	4.5401	4.35644	4.95994	4.8445	5.10288
GNAI1	8.61437	8.31389	8.46176	8.75163	8.02321	8.74604	9.08254	8.89082	8.52068	9.03289	8.79459	8.94195	9.044	8.62912	8.23978	8.99217	8.80617	9.09578
ITGA6	4.19745	4.39515	4.69138	4.68969	4.25294	5.01597	4.90894	4.5739	4.82031	4.81708	4.78246	4.68271	4.54189	4.45772	4.31587	4.81681	4.55168	5.18301
LOC105758566	4.18121	5.00057	4.58108	5.66864	5.19253	5.35371	5.25711	5.22782	4.98135	4.82065	5.32855	5.42092	4.57887	5.18676	4.43611	5.66692	5.84165	5.67965
CECR1	3.43468	3.49963	4.71271	3.40826	3.89809	4.60242	5.01196	4.72118	4.71277	3.52435	3.69799	3.05631	4.58867	5.23441	4.45101	4.52581	4.57833	4.98829
FUK	3.5864	4.15027	3.4988	3.98513	4.09852	4.44064	3.90747	4.13068	4.36293	4.29964	3.99284	4.22487	4.128	4.49152	3.80342	3.72703	4.11909	4.65235
LOC105759421	1.04914	2.0239	1.50471	2.04148	1.00048	1.851	2.08823	2.84369	1.86014	1.4832	1.60738	1.74764	1.54504	2.10748	2.40108	2.43531	2.09673	2.52292
GORAB	3.88243	4.03392	4.27044	4.15815	3.97273	4.45351	4.38828	4.2293	4.36972	4.45808	4.17033	4.04448	4.49348	4.41344	4.18227	4.23203	3.84439	4.82708
GTF3C2	4.46521	4.80942	4.57148	4.74804	4.89184	4.81464	4.72825	5.23669	5.06318	5.1967	4.98678	4.89258	5.11034	4.9913	4.63108	4.39225	5.01334	5.3758
LOC100232535	7.60083	7.85707	7.65429	8.05466	7.41792	7.95165	8.07928	8.12343	7.63823	8.07813	8.19731	8.08681	7.84801	7.72646	7.72576	8.30074	8.01424	8.2121
MSH4	4.34948	4.79806	5.1884	5.03384	4.72573	5.00169	5.05303	5.45937	4.88097	4.82501	5.07584	5.26034	4.76881	4.64099	4.97095	5.21448	5.18176	5.26533
SFT2D1	5.11771	5.30214	5.02428	5.24003	4.97536	5.2367	5.47881	5.64618	4.88984	5.56715	5.5999	5.52227	5.50191	5.62939	5.03329	5.54049	5.23189	5.81043
ATP6V1C1	7.28565	7.33563	7.37498	7.65814	7.1862	7.65634	7.64557	7.79395	7.33725	7.6122	7.85156	7.82187	7.55707	7.23977	7.20569	7.63609	7.73802	7.93629
ATRAID	6.18257	6.75047	6.40133	6.34793	6.57318	6.79566	6.46629	7.08835	6.73391	6.56268	6.46827	6.77938	6.92628	6.76355	6.45252	6.66248	6.69088	6.83804
NDUFS6	7.08093	7.77796	7.16407	7.34974	7.61162	7.69515	7.57469	7.54703	7.60778	7.50844	7.39449	7.68045	7.52655	7.63382	7.48406	7.87271	7.37232	7.86891
PRPF39	7.03886	7.03379	6.98785	6.99538	7.11371	7.22278	7.12622	NA	7.11946	7.15934	7.05787	7.19476	7.08871	7.12265	7.0535	7.0159	7.16191	NA
SPOPL	4.66056	4.6594	4.25669	4.71095	4.46462	4.65378	4.59713	4.89422	4.42996	4.60048	4.76063	4.90007	4.89355	4.90466	4.70031	4.9924	4.76672	4.7634
ARL1	7.43304	7.76182	7.53025	7.56956	7.71486	7.78742	7.51379	7.7415	7.685	8.01756	7.52873	7.59157	7.75391	7.72201	7.85407	7.69149	7.6531	8.09625
GRIA3	6.16814	6.05149	6.18945	6.37407	6.41646	6.40406	6.44509	6.58882	6.29822	6.40848	6.78389	6.45599	6.24009	6.09937	6.06984	6.43483	6.41448	6.65201
LOC100226209	1.41679	1.42719	1.32038	1.41477	1.9097	1.7158	1.5798	1.7276	1.57867	1.85506	1.38779	1.74678	1.75559	1.70298	1.15258	1.90776	1.66559	1.94065
PTP4A1	8.48256	8.60019	8.20874	8.86425	8.34699	8.74263	8.77218	8.6986	8.67654	8.76857	8.98609	8.70467	8.71292	8.74842	8.22224	9.04867	8.82377	8.96388
NXT2	5.03416	5.36541	5.47388	5.40067	5.30326	5.57472	5.3547	5.55465	5.24894	5.27902	5.42403	5.62239	5.2904	5.43393	5.20373	5.43122	5.47118	5.91276
RNH1	4.95296	4.75722	4.91963	4.47213	5.01388	4.76716	4.76942	5.03321	5.29148	5.16094	4.61028	5.07724	5.02344	5.21682	4.86042	5.26085	5.02417	5.38473
EIF1B	6.73114	6.98705	7.01205	7.02433	6.88348	7.03441	7.10678	7.13908	6.84184	6.83947	7.11771	6.99871	6.83685	6.94434	7.02222	7.16402	7.35713	7.15388
ELP2	4.78684	4.7576	4.64698	4.79105	4.68917	4.92207	4.75593	5.03733	4.83061	4.96656	4.87233	4.97771	4.95543	4.7288	4.6711	5.02195	4.72044	5.22833
FBXL14	5.43002	5.58998	5.57326	5.67218	5.66892	5.50742	5.82008	5.97174	5.81193	5.7301	5.6562	5.68872	5.61178	5.61109	5.56259	5.78009	5.65454	5.83011
ING3	4.46333	4.54493	5.12846	4.98128	4.64837	4.94215	4.87894	5.14328	4.88746	4.69848	5.14292	4.9988	4.73356	4.37056	5.0067	5.05984	5.04093	5.28488
NAPG	6.94983	7.05369	7.0414	7.32133	7.00284	7.21979	7.34436	7.53548	6.97566	7.2067	7.4835	7.50295	7.05833	6.97837	6.95082	7.52113	7.37314	7.53249
NR0B1	2.86267	3.77697	3.13799	3.36359	2.89239	3.94488	3.55713	3.88317	3.99972	3.85885	3.85102	4.00124	4.07094	4.28747	2.97098	3.84251	3.3162	4.04813
NUDT8	4.82529	5.2987	5.18994	4.92732	5.54368	5.47604	5.49309	5.8811	5.61573	5.31345	4.94175	5.5082	5.44547	5.52937	5.10459	5.13951	5.54385	5.79278
OLAH	1.03755	0.382353	0.218225	1.08612	0.397683	0.552481	1.32077	1.22976	0.692145	1.59602	1.23341	0.899016	0.955153	1.57495	0.422565	1.06975	1.12082	1.62866
LDHD	2.55436	2.34	3.23994	2.03108	2.69343	2.73208	3.08927	3.89978	3.95872	3.46556	3.59688	3.08873	3.1174	3.53487	2.20753	3.07597	2.84102	3.81941
LOC100221599	1.63219	1.15407	1.85068	1.7425	1.93629	1.16187	1.67756	1.94803	1.83334	1.10001	2.44788	NA	1.47379	2.5151	2.47981	1.12754	2.96589	2.83565
LOC105759137	1.20464	2.41342	1.83699	2.27648	2.12427	2.13254	2.43536	2.57183	2.42243	2.28516	3.19589	2.9644	2.02391	2.01573	1.6856	2.38022	2.64601	2.65135
RMDN2	3.12054	2.8954	2.93712	2.93601	2.62258	3.44621	3.13652	3.70375	2.8894	3.10987	3.24266	3.17189	3.15622	3.06987	2.94881	3.40439	3.31813	3.59853
SCG5	7.57717	8.11125	8.27895	8.47303	8.12274	8.29392	8.42	8.71239	8.05047	8.31955	8.61949	8.1637	8.23565	7.94025	7.86625	8.63729	8.57273	8.66474
CEP19	3.96439	4.18705	4.58645	4.13432	4.91387	3.96745	4.17345	4.57013	4.67759	4.5316	4.62673	4.56133	4.51168	4.40802	4.98134	4.14439	4.30724	5.15722
ERCC5	5.32951	5.12299	5.21282	5.32552	5.22487	5.46113	5.45592	5.59104	5.25883	5.3465	5.30292	5.63408	5.22134	NA	5.24079	5.41378	5.25821	5.71664
HNRNPD	7.07496	7.1198	7.22947	7.38969	7.07937	7.32813	7.24097	NA	7.01868	7.22186	7.30999	7.3663	7.27905	7.14757	7.06431	7.49393	7.35616	7.51516
MTERF3	5.59274	5.72152	4.98299	5.53183	5.64158	5.36163	5.62491	5.79352	5.72532	5.98142	6.07968	6.24133	5.51039	5.66941	5.70497	5.91635	5.69215	6.00658
TRMT44	3.27777	3.16478	3.54582	3.1303	3.57093	3.9247	3.89264	3.89249	3.54412	3.5988	3.32977	3.20016	3.5902	3.61256	3.73574	3.6651	3.20624	4.03743
CIDEC	2.00999	0.505757	3.88985	0.0222987	3.89565	3.76014	3.40764	3.85421	3.61423	0.796385	2.37673	2.66244	3.64751	4.20698	2.6388	2.30777	3.40835	4.37015
LIN9	2.56592	2.94202	2.98098	2.76193	2.52842	3.32126	3.11643	3.05862	2.72329	2.61425	3.01917	3.13071	2.82082	2.81343	3.01393	2.89773	3.11612	3.66963
BTBD1	5.69712	6.09428	5.97119	6.29247	5.9312	6.01447	6.02524	6.12464	5.70697	6.30445	6.41805	6.2218	5.74964	6.18462	6.03785	6.22051	6.27432	6.68056
ENKUR	1.93748	2.61713	2.90435	3.07076	3.09889	3.46374	3.51864	3.29576	2.45013	3.93051	4.05174	4.04915	2.78626	3.6249	2.85302	2.47801	2.63955	3.88731
KIAA1644	4.43832	4.46834	4.45025	4.74489	4.65365	4.59113	4.70334	4.25947	4.46966	4.60328	4.54259	4.74767	4.49971	NA	4.53027	4.99674	4.69562	4.85967
GTPBP10	4.67492	4.53851	5.03607	5.14232	4.81233	5.02392	5.03882	5.16985	4.93067	5.07766	5.1439	5.0346	4.89518	4.82813	5.16288	4.68727	4.82775	5.25137
BMP4	2.6048	2.81763	2.78506	2.99242	2.8033	3.02452	2.64949	2.43093	2.88822	3.07494	2.928	2.91169	2.9575	3.4242	2.7318	NA	3.03896	3.29275
IFNGR1	3.95295	3.96317	3.62363	3.90554	3.94049	4.08423	4.12383	4.19812	3.94464	4.0681	4.30794	4.26932	3.82197	4.11239	3.89749	4.29192	3.91827	4.20338
NUDT14	5.15396	5.46847	6.25582	5.37188	5.7185	5.75372	5.84668	5.86737	5.91152	5.7927	5.90609	5.34556	5.96603	5.82586	5.5917	5.5594	5.93307	6.33322
C3H17orf59	4.97555	4.66932	5.70257	5.13008	4.81894	5.2403	5.14002	5.28832	5.21159	4.85614	5.70651	4.98647	5.5116	5.20724	5.00392	5.25719	5.37927	6.1382
LOC105759887	3.57166	NA	4.63428	2.63651	3.91531	3.97555	4.21131	4.03468	4.78858	4.01555	4.57109	4.58671	4.57028	3.72057	3.6343	4.64337	4.38308	4.78778
TBL2	5.41638	5.6154	5.58184	5.64792	5.70938	5.69688	5.47041	5.93298	5.74483	5.74762	5.54728	5.9095	5.65291	5.64712	5.61106	5.75368	5.74735	NA
LOC100218166	2.37895	3.02803	2.87187	2.99367	2.99526	3.31342	3.35567	3.50272	3.16656	3.54577	2.5243	3.20879	3.36589	3.03672	2.68465	3.05926	3.16291	3.59706
RAB1A	8.69963	8.76494	8.61777	8.92244	8.70714	8.88968	8.77805	9.04698	8.75975	8.82091	8.99367	8.89585	8.83124	8.70002	8.77158	8.95477	8.9273	NA
EXT2	5.08507	5.0321	5.24143	4.96817	5.25398	4.80126	4.97772	5.00092	5.14503	5.23169	5.15539	5.23451	5.23667	NA	5.20162	5.19139	5.40329	5.49273
GMPPB	5.39782	5.69055	5.34	5.46369	5.63585	5.46933	5.67679	5.65421	5.95372	5.60233	5.50504	5.77074	5.83116	5.96234	5.37138	5.4412	5.82359	6.04534
LGMN	6.2036	6.1603	6.77178	6.25095	6.27885	6.6022	6.50515	6.57396	6.55304	6.23476	6.3549	6.3969	6.62798	6.53904	6.59995	6.46833	6.5289	NA
LRRCC1	2.70419	2.21516	2.75504	2.49598	2.50616	3.02006	2.86782	2.80627	2.61776	2.72684	2.60646	2.70321	2.85255	2.35826	2.86625	3.08631	2.56544	2.96948
PKIA	7.49409	7.7301	8.06309	7.97687	7.87094	7.8574	7.87951	8.04946	7.62673	7.77242	8.11222	7.81692	8.01088	7.44596	8.23627	7.99753	8.07629	8.32862
ZNF385B	3.94136	3.67917	3.86971	3.90975	3.77252	3.96072	4.06844	4.3685	4.21474	3.82669	3.93937	4.15058	4.00902	3.80147	3.51692	4.27656	4.38005	4.45716
ADPRM	4.16113	4.49106	4.9872	4.05831	4.83796	5.19118	4.75454	4.68225	5.38746	4.91185	4.59739	4.45102	5.31664	5.3684	4.973	4.52299	5.36563	4.68874
ARPC5	9.11505	9.31955	9.48439	9.24344	9.27773	9.55551	9.35738	9.45911	9.6348	9.5889	9.46666	9.25058	9.6974	9.69117	9.39222	9.14949	9.43866	9.6454
ELOVL5	6.07102	5.98036	5.97719	6.12085	5.78922	5.95456	6.20459	5.73937	6.11642	6.11496	6.36722	6.37408	6.17505	6.12554	5.85002	6.31094	6.25677	6.56692
PROS1	6.13148	6.52122	6.47198	6.18269	6.30147	6.48892	6.48901	6.74416	6.27544	6.42237	6.6673	6.56059	6.39194	6.03223	6.59229	6.58108	6.57306	7.05133
TATDN1	3.55411	3.29776	4.15417	3.74752	4.08627	4.30318	4.07995	4.25167	3.17383	3.63862	3.9967	4.16832	3.87568	3.99173	3.83739	3.62677	4.15928	4.70146
ERMARD	3.23258	3.12538	3.52362	3.69715	3.65918	3.57418	3.40399	4.07736	4.09175	4.46754	3.65781	3.29653	4.04184	3.67159	3.14933	3.72968	3.76297	4.06376
LOC105760237	0.137304	0.0196497	1.377	1.07097	1.41581	1.70031	0.347743	1.90984	1.13946	2.28773	1.19396	0.575943	2.1527	1.65149	0.368544	1.82601	1.3523	1.19697
LRRC49	4.89919	5.45368	5.30824	5.31087	5.31296	5.51404	5.46678	5.32681	5.08286	5.58383	5.51798	5.69505	5.25913	5.32082	5.17003	5.32809	5.47429	5.85118
ANXA7	3.65721	3.5148	3.65368	3.48541	4.12518	4.00952	3.80159	3.98906	3.84769	3.84207	3.82256	3.57824	4.33315	3.78122	3.53901	3.58135	3.99595	4.32921
APOO	6.35048	6.30786	6.51425	6.30136	6.45226	6.47222	6.31342	6.57326	6.60518	6.65048	6.69815	6.23078	6.58101	6.53049	6.34713	6.42931	6.45278	6.86697
SGCB	4.70258	5.34079	5.53241	5.32317	5.42785	5.84386	5.73953	6.13045	5.53376	5.60157	5.87493	5.25539	5.67389	5.37439	4.96852	5.1827	5.83238	6.12125
SLC17A6	5.61345	5.36466	5.53094	5.29131	4.99271	5.5788	5.66612	5.94832	5.57906	5.96282	5.93124	5.88464	5.62099	5.49744	5.27103	6.00155	NA	6.03102
LOC100222735	5.03672	4.48229	5.50361	4.59814	5.4217	5.5054	5.58799	5.77659	5.62469	5.1697	5.5144	4.62276	5.47019	5.41197	5.53704	5.80368	5.50875	5.06805
LOC100226714	5.95601	5.62793	6.3015	5.76722	5.95659	6.10973	6.13402	6.5009	6.024	5.82351	6.08186	6.37013	5.9568	5.85493	6.3338	6.15726	5.97587	6.46086
SERF2	8.40847	8.93217	8.63475	8.85395	8.58743	9.01184	9.03422	9.26642	8.98892	8.75142	9.29313	9.6096	9.022	9.457	8.13388	8.99914	9.1814	9.36078
SLC25A12	5.93464	6.3187	6.16835	6.49195	6.2237	6.25896	6.2703	6.85528	6.0486	6.63546	6.47715	6.66371	6.38913	6.17071	6.31962	6.44578	6.30619	6.74969
TMX3	6.13752	6.42459	6.34356	6.6809	6.46034	6.53721	6.73466	7.00674	6.64521	6.79985	7.06662	6.59791	6.58655	6.48657	6.14724	6.62384	6.76074	6.72448
ZDHHC16	5.02914	4.92582	5.40672	4.7869	5.32051	5.27282	5.18891	5.45099	5.34528	5.46187	5.18105	5.42543	4.96647	5.60534	5.17731	5.10551	5.08694	5.78192
ATL2	6.1095	6.06275	6.53786	6.40679	6.1993	6.39684	6.31144	6.60437	6.22349	6.25635	6.23985	6.41462	6.28765	6.08199	6.41363	6.48058	6.39741	6.70726
CPSF3	6.12361	6.02521	5.89068	6.07321	5.98269	6.14174	6.03148	6.19519	6.14433	6.11735	6.17137	6.20319	6.08506	NA	6.13322	6.12749	6.06655	NA
NPHP1	4.48927	4.83094	4.27498	4.9079	4.69524	4.71895	4.60961	5.47102	4.94895	5.06854	5.05052	5.10527	5.13671	4.84579	4.23439	4.9311	4.88825	5.54017
SNX24	5.55175	5.75592	5.88156	5.96253	5.78647	5.8724	5.86841	6.23513	5.78918	5.98178	6.11238	6.20159	5.98737	5.89861	5.94643	6.28822	5.96913	5.67592
USB1	3.46646	3.65388	3.97843	3.5838	4.23083	4.31824	4.01737	4.67789	4.22177	3.91205	4.12105	4.17597	4.33146	4.1179	3.44872	3.57969	4.14087	4.50053
C3H1orf198	4.99855	5.0155	4.80219	4.7786	4.81121	5.16649	5.08988	5.09588	4.97855	5.13972	5.32443	5.07975	5.0817	5.23322	4.81036	5.11003	4.88623	5.49857
CCDC90B	5.6939	5.80001	5.57817	5.91545	5.92324	5.97125	6.10272	6.31234	5.9183	5.74609	5.85562	6.03916	6.11022	5.59168	5.75445	6.35606	5.74824	6.37578
DEK	4.04088	4.24665	4.5242	4.48013	4.11068	4.07275	4.49286	4.66188	4.0597	4.65141	4.59324	4.51081	4.60057	4.02049	4.47551	4.33935	4.8287	4.86481
JAZF1	4.60177	4.99915	5.03147	5.23984	4.9441	5.10601	5.32995	5.19844	4.69062	5.10412	5.59292	5.07411	5.11103	5.04828	4.84183	5.15342	5.19663	5.41918
LOC100224918	0.137304	0.550326	0.0157876	1.11309	0.733545	2.30753	0.719546	1.95935	0.243128	1.28055	1.43534	0.610413	1.83197	1.6986	0.401209	1.71342	0.227679	1.84366
LOC101233769	5.13132	5.29098	4.82205	5.92244	NA	5.46869	5.40681	5.79989	5.23269	5.75969	5.68522	5.6902	5.78324	5.53152	5.30849	5.46642	5.57792	5.55647
TDP2	4.58618	4.72448	5.05046	4.81653	4.4513	5.19375	4.9212	5.31169	4.83197	4.95666	4.98262	5.06661	4.81961	4.92535	4.57189	4.92414	4.93248	5.71804
VRK1	5.45901	5.82469	7.03564	6.33291	6.69679	6.73586	6.41795	7.3561	6.45342	6.76848	6.66538	6.12574	7.00573	6.24579	5.62972	6.81204	6.57254	7.38159
NDUFS5	6.22277	6.84051	6.79116	7.14716	6.8289	7.08966	7.00856	7.00955	6.92793	7.48636	6.8557	7.30782	7.45783	7.50572	6.21947	7.28152	7.01445	7.13682
SNX3	6.89543	6.98311	6.75887	7.21177	6.55681	7.08685	7.15037	7.2686	6.90905	7.18772	7.04418	7.4222	7.07807	7.07294	6.90198	7.13662	7.08223	7.38689
ZNF770	3.37112	4.05201	4.11901	4.34383	3.96676	4.313	4.28078	4.59537	3.92876	4.07396	4.33292	4.1063	3.97211	3.80753	3.95271	4.2224	4.27725	4.57013
ANAPC16	6.41342	6.79183	6.72727	6.40787	7.02757	6.69965	6.66932	7.09985	7.06772	7.19452	6.56001	6.94429	6.66477	7.0959	6.73457	6.84887	6.69276	7.26431
ELMOD1	8.34638	8.71043	8.47342	8.70328	8.33606	9.10575	9.129	9.44162	8.80176	8.40517	8.98338	8.58478	9.1374	8.59109	8.54916	8.70162	8.83604	9.54071
FAM98B	4.41504	4.83665	4.75158	5.0322	4.94562	5.12047	5.08959	5.14512	4.8533	4.90485	4.92923	4.75343	5.0842	4.90267	4.3955	5.08565	5.01304	5.33872
KIAA1143	4.96928	5.40396	5.32068	5.41696	5.00169	5.54594	5.52367	5.29028	5.4594	5.38023	5.51602	5.05141	5.51374	5.40984	5.21771	5.42914	5.47578	5.70215
LOC105759405	3.52313	3.69208	3.90761	3.83701	3.80681	3.77906	3.73455	3.9424	3.79653	3.60367	3.94811	3.9135	3.84736	3.4684	3.85857	3.94308	3.77964	4.26371
RASGEF1A	8.09009	8.2635	8.75941	8.5285	8.19142	8.52462	8.70659	8.83854	8.33299	8.56894	8.83574	8.25463	8.61593	8.38458	8.29878	8.64011	8.55439	8.99145
TAB1	5.56096	5.50247	6.12611	5.36463	5.83365	5.65714	5.76797	5.91083	5.82431	5.90033	5.62614	5.95352	5.67156	5.92291	5.84506	5.74224	5.72612	6.20198
WRNIP1	3.75236	3.91041	4.15331	3.73658	4.13769	4.09454	3.99646	4.32512	3.99741	4.03388	4.10868	4.37372	4.13363	3.88416	3.90411	3.80937	4.1671	4.46745
ATP8A1	4.8695	5.02547	5.40412	5.31016	5.53571	5.51499	5.53704	5.66833	5.16229	4.99882	5.77531	5.16895	5.39183	5.04574	5.03464	5.4636	5.77954	5.66315
FAM96B	6.67674	7.32696	6.52181	7.11447	6.92142	7.08195	6.92386	7.22101	7.10931	7.13379	7.17793	7.24781	7.40603	7.2582	6.64285	7.4719	7.17539	7.37939
GSTK1	5.89219	5.76888	6.00018	5.5117	5.95369	6.08889	5.84808	5.83611	6.46493	5.88154	6.48176	5.78538	6.3426	6.10363	6.12378	5.69574	6.04794	6.48581
LOC105758624	2.42506	2.08686	2.453	2.92334	3.35086	2.3814	2.5703	2.17738	3.06614	2.63276	2.67621	2.48784	2.92443	3.19713	2.2782	2.90073	2.8595	3.33986
MED23	5.87132	6.00428	5.89658	6.13937	6.22772	6.13181	5.89989	6.11615	5.93193	5.95726	6.00293	6.15487	6.19714	5.98941	6.00467	5.97674	6.20706	6.35584
PLRG1	5.6766	5.4766	5.51394	5.61756	5.51709	5.68234	5.70401	5.83694	5.7119	5.65226	5.79876	5.5932	5.63144	5.69935	5.36045	5.67224	5.82396	5.9953
ZBTB25	3.95934	4.37043	4.58182	4.20175	4.48394	4.11363	4.63055	4.9715	4.68878	4.43827	4.16985	4.45389	4.3735	4.42095	4.44649	4.38702	4.63178	4.96022
PHLPP1	5.81186	5.73231	5.61073	5.90971	5.69219	5.98015	6.03106	5.73442	6.01629	5.78648	6.06183	5.93358	5.80436	5.83909	5.74068	5.91721	5.8456	6.02484
RSL24D1	6.04975	6.11971	6.39302	6.36862	6.1014	6.65371	6.70039	6.94994	6.43651	6.30318	6.42601	6.54511	6.39356	6.31693	6.36165	6.16084	6.29991	6.81329
ATP1B3	9.17837	9.18447	9.11883	9.48431	8.96376	9.34839	9.4909	9.53088	9.06313	9.41368	9.49895	9.55007	9.32844	8.97967	9.17217	9.60433	9.58157	9.65736
DALRD3	4.21982	4.45449	3.93731	3.96464	5.01671	4.34586	4.286	4.35652	4.85065	4.6802	4.35748	4.38919	4.50894	4.62144	4.37215	4.55995	4.52722	4.81951
GPS1	6.7734	6.8275	6.79934	6.71356	6.90373	6.80756	6.78245	6.8195	6.91342	6.83436	6.78324	6.82974	6.95043	7.0507	7.0362	6.83054	6.8439	NA
MAEA	6.04747	6.13354	6.1223	6.04015	5.94712	6.2773	6.17964	6.54644	6.21314	6.13802	6.25643	6.25174	6.26318	6.11145	5.94957	6.24771	6.19426	6.62513
PRKACB	6.61068	6.96973	6.68058	7.12939	6.65903	7.10311	7.10028	7.21946	6.87697	7.00598	7.22891	7.02929	7.07291	6.79712	6.52614	7.19608	7.20787	7.29719
SLC17A5	3.56749	3.75268	3.39092	3.79701	3.18333	3.50844	3.53917	3.6528	3.78089	3.69266	3.6593	3.87393	3.97127	3.66503	3.59875	3.80478	3.76214	4.24664
UBA3	6.32577	6.19907	6.50907	6.45493	6.13444	6.50002	6.41971	6.6912	6.24126	6.47002	6.76507	6.58382	6.45399	6.35613	6.58864	6.51054	6.25233	6.75975
DBNDD1	4.32403	4.58227	4.32396	4.5716	4.66518	4.41769	4.21348	5.15004	4.56424	4.3624	4.97643	5.16513	4.78788	5.19822	4.12081	4.72209	4.72906	5.32345
LOC100231406	5.79735	6.00647	5.94188	6.27541	6.23187	6.19349	6.12197	6.19609	6.08721	6.00528	6.39995	6.10798	5.91124	5.88807	5.81656	6.4298	6.74594	6.43528
NBAS	5.1707	4.9274	5.14571	5.16717	5.22264	5.38475	5.22813	5.32175	5.33728	5.25547	5.18754	5.36641	5.15506	4.94128	5.09478	5.08806	5.31765	5.67459
COMMD3	6.83252	6.65589	6.77351	6.63326	6.52665	6.80266	6.79327	7.31046	6.72605	6.96957	6.82172	7.01567	6.92473	6.85296	6.97655	6.99832	6.67774	7.09286
CSTF2	6.4493	6.74007	6.54402	6.65103	6.78885	6.67149	6.64953	6.86583	6.76469	6.73297	6.54074	6.76072	6.51067	6.75997	6.778	6.54875	6.79152	7.09482
LOC100225533	1.71826	0.333058	0.952066	0.954222	0.991413	0.695007	2.22721	2.33525	1.44615	1.39056	1.48068	2.18568	0.720317	0.130767	2.38081	2.51649	1.87926	2.46062
MIS18A	4.37427	4.8622	4.31512	4.67113	4.78599	4.71263	4.63872	5.32896	5.00023	4.05365	4.87069	4.59518	4.93354	4.72586	5.0007	5.02483	4.87129	5.1931
MRPS15	6.90792	7.04301	7.05621	7.03527	7.43502	7.37787	7.15806	6.85971	7.50347	7.16143	7.21538	7.2719	7.53645	7.44482	7.09388	7.33315	7.30217	7.07202
CC2D2A	2.72702	2.91584	3.11638	3.30704	3.01613	3.30067	3.06186	3.28791	3.21419	3.01229	3.17425	3.22568	2.89368	2.81693	3.00418	3.15371	3.19057	3.47737
KCNC1	6.53827	6.60237	7.01557	6.79391	6.65736	6.86642	6.82815	7.06567	6.68733	6.96483	6.99198	6.89022	6.69413	6.45375	6.74372	6.89767	7.00795	7.22767
TRIM14	2.07863	1.11739	2.68995	1.35067	2.20128	2.809	2.67861	2.49309	2.68935	1.50853	2.07868	1.92051	2.14523	2.42784	2.17603	2.2756	2.59677	2.67691
VBP1	6.41259	6.40061	6.14491	6.4634	6.03196	6.50939	6.50732	6.80171	6.40823	6.70014	6.5428	6.69494	6.51369	6.35011	6.30109	6.64064	6.47243	6.8073
LIN7C	5.91941	6.01501	5.87366	6.11739	5.79347	6.03943	6.19486	6.16633	5.93532	6.22348	6.07077	6.18473	6.09613	5.9261	5.77249	6.22563	6.14673	6.45283
LOC100227877	NA	1.81713	1.91327	1.40281	2.05893	2.16452	2.3035	2.64293	2.07006	1.60833	1.61364	1.46231	2.60266	2.73745	1.79419	2.40442	2.83196	2.53336
SEC61G	7.49035	7.66269	7.40735	7.41876	7.57	7.84382	7.58692	7.74249	7.74805	7.77097	7.45417	7.69894	7.75169	7.8963	7.513	7.65437	7.62559	7.76971
SEC62	6.48995	6.25726	6.40545	6.42642	6.39217	6.56598	6.65897	6.44441	6.31675	6.26266	6.68448	6.67188	6.4259	6.23243	6.48514	6.757	6.53889	6.76037
TXNDC15	6.60677	6.52403	6.38029	6.49257	6.25224	6.60023	6.63173	6.75981	6.44144	6.76365	6.92057	6.79461	6.5838	6.36465	6.71983	6.62688	6.5665	7.04653
ALCAM	7.52063	7.20046	7.56386	7.35956	6.82956	7.82001	7.65999	7.5738	7.72263	7.50016	7.53544	7.65186	8.02131	7.12562	7.63677	7.78218	7.50631	7.99967
DPYSL4	1.28212	1.75492	1.84188	1.22271	2.03818	2.2332	2.09776	1.7745	2.16181	0.859439	2.50165	1.7657	2.18509	2.81908	1.83747	2.34994	2.37431	1.80218
FES	2.65943	2.24661	1.94786	2.53398	2.26844	2.69041	2.38429	2.45356	2.67885	2.72543	2.2931	3.06298	2.62965	2.57734	2.29	2.57365	2.57637	2.99368
GTF3C5	4.40828	4.37522	4.40692	4.23055	4.68793	4.40395	4.3362	4.70129	4.55084	4.35124	4.47579	4.50066	4.69277	4.72646	4.61994	4.32167	4.77041	NA
LOC105760994	3.97896	3.76598	3.06422	4.32395	3.60414	4.54811	4.11385	4.13868	4.57028	4.96154	4.60832	4.0007	4.97461	4.79428	3.76085	4.50751	4.28183	3.96837
LRRC75B	5.06594	5.35331	NA	4.93537	4.96359	5.65191	5.01642	6.11469	5.63308	5.23865	5.24556	4.87124	6.00237	5.34793	6.18238	NA	5.56722	5.87897
RPS8	9.23257	9.47075	9.25057	9.57192	9.34659	9.41681	9.55556	9.44815	9.44116	9.44512	9.41986	9.51679	9.51088	9.49439	9.18258	9.45997	9.50959	9.77092
LOC101233157	0.137304	0.979574	1.23688	0.0222987	0.870402	1.19346	0.579838	1.86983	1.6533	0.73859	1.41239	1.5423	1.49959	0.55772	0.636914	2.17026	1.42789	1.09309
LRRC16A	5.41385	5.49505	5.46845	5.61117	5.38139	5.61804	5.70437	5.85635	5.76576	5.56262	5.9276	5.58783	5.58767	5.23353	5.58118	5.74359	5.70359	5.7831
MRPS30	6.63574	6.77203	6.63471	6.89975	6.73779	6.88378	6.7518	6.71674	6.73081	6.83591	6.86815	6.80353	6.88941	6.78468	6.81505	6.78854	6.74957	NA
SMIM20	6.00715	6.19078	6.54867	6.56036	6.61215	6.53555	6.36692	6.80848	6.72304	6.81481	6.7225	6.54174	6.38618	6.60024	6.32285	6.13666	6.4822	6.81794
TAPT1	4.94097	4.9803	5.04578	5.16412	4.92362	5.24235	5.24288	5.3932	5.13435	5.21426	5.16097	5.17078	5.34673	4.93213	4.92811	5.0094	5.15044	5.49144
THOC7	6.27092	6.40993	6.79287	6.36748	6.47567	6.74904	6.78429	6.71068	6.52891	6.45939	6.57612	6.51433	6.91667	6.69576	6.56092	6.43057	6.43732	6.95348
ACTC1	0.86563	0.574809	1.0227	0.779777	1.15748	1.49722	0.68658	0.940086	1.53829	1.33971	0.715317	1.00362	1.64096	1.44119	0.942731	1.13841	0.690364	1.61422
KLHL28	7.60979	7.74442	7.78174	7.43969	7.84703	7.64455	7.64977	7.74386	7.90615	7.52771	NA	7.78622	7.76587	7.98786	7.91421	NA	7.69345	8.00508
ZUFSP	4.89876	4.89215	4.73446	4.99187	4.70676	5.00595	4.91455	NA	4.73299	5.0024	5.01081	5.03823	4.99955	4.72988	4.98445	4.99011	4.94865	5.34322
CENPW	0.723213	1.3622	0.998933	2.04746	1.51159	2.0742	1.5948	1.98444	1.10126	1.69195	1.50534	2.218	1.69671	1.76319	0.806019	1.42017	1.90122	2.0501
LOC100223864	6.33547	6.55034	6.65818	6.27037	6.55532	6.62745	6.3848	6.44964	6.67631	6.57734	6.47079	6.64375	6.44357	6.98212	6.94503	6.4593	6.53768	6.9147
POMP	7.76468	7.62985	7.55206	7.78645	7.65625	7.80785	7.82453	8.07156	7.69577	7.86717	7.90109	8.00686	7.84897	7.79902	7.59277	7.89944	7.61109	8.09027
SCFD1	5.05058	4.97804	5.06951	4.99919	4.94735	5.28194	5.1568	5.43468	5.01591	5.02938	5.20039	5.14465	5.105	4.94186	5.03771	5.17411	5.2014	5.38134
WNT1	1.74514	1.43186	2.45842	1.49115	2.4839	2.16191	2.19141	2.34118	2.3055	2.12171	2.11172	1.42801	2.2837	2.18723	2.07457	1.91106	2.37576	2.49075
ARL5B	5.00779	5.1723	4.97187	5.02517	5.11594	5.12593	5.37164	5.57336	5.38016	5.78283	5.58702	5.59457	5.33199	5.15646	4.92501	5.51158	4.98462	5.59215
CDK8	4.427	4.4453	3.83542	4.49145	4.48877	4.82811	4.81716	4.91603	4.52662	4.84404	4.76981	4.85194	4.56748	4.62624	4.07071	4.55571	4.58072	4.95141
LIN52	5.43046	5.6552	5.83009	5.68337	5.63284	5.80874	5.8768	6.02585	5.58346	5.57624	5.86954	5.61131	5.84859	5.63885	5.51335	5.67453	6.01078	6.22134
LOC100226935	3.41381	3.05086	3.97906	4.23639	3.86772	4.48646	4.14539	4.31979	4.21098	4.09135	3.58187	3.75453	4.02925	3.71158	3.75012	3.54643	3.86899	4.55985
LOC100227748	1.13191	0.631296	1.48545	2.00088	0.925923	2.43234	2.2136	2.08792	1.45542	1.72421	1.85665	2.05194	1.57112	2.09571	0.852591	1.23618	1.53974	2.33823
SLMO2	6.24533	6.20627	6.37715	6.23057	6.2282	6.62563	6.51921	6.72993	6.43496	6.37629	6.54014	6.58268	6.49077	6.5451	6.31744	6.50057	6.61059	6.18582
GABPB1	3.49287	3.80913	4.0215	4.11316	3.80993	4.01392	4.25564	4.25642	3.64962	3.68188	4.16386	4.27001	4.0248	3.91726	3.5098	3.99773	4.15256	4.60778
LOC101233484	4.64357	4.78882	4.54043	5.02131	4.57964	4.85268	4.94399	4.87792	4.61725	4.88918	4.92585	4.94501	4.85838	4.72249	4.56121	5.00991	4.88507	5.18713
MED17	4.20492	4.36155	4.1452	4.52025	4.18794	4.55268	4.38543	4.32748	4.23458	4.65624	4.43048	4.35034	4.66843	4.41679	4.17886	4.37396	4.34362	4.96512
OAT	7.06814	6.63265	6.97485	6.58124	7.05502	6.98712	6.8756	7.02212	6.97253	7.00932	6.77064	6.95466	7.12132	7.07468	6.80909	7.08855	6.96909	7.28174
TBCC	5.55054	5.46992	5.40934	5.64583	5.71065	5.41199	5.50652	5.24576	5.61744	5.70589	5.53586	5.75138	5.75	5.68862	5.64876	5.57947	5.55666	5.98166
YIPF4	5.42192	5.65019	5.67966	6.00469	5.39217	5.90268	6.00498	6.23014	5.54943	5.75589	6.15613	6.03307	5.87161	5.76182	5.35032	6.03224	5.78912	6.27889
ITM2B	9.45786	9.43289	9.6043	9.65595	9.24208	9.53957	9.5708	9.71437	9.27485	9.61564	9.55836	9.69945	9.5003	9.60022	9.61083	9.71081	9.56798	9.88194
SAAL1	5.2703	5.3685	5.7958	5.30015	5.67761	5.62558	5.48987	5.83199	5.42277	5.50471	5.5077	5.53034	5.55333	5.4813	5.68943	5.42167	5.54953	6.02009
LOC100219010	2.45242	1.69093	0.495556	1.2129	1.61176	4.85861	1.11714	5.18864	0.759849	1.89312	5.42635	5.1966	1.66757	1.77407	4.96471	2.15668	4.04708	4.34467
LOC105759332	4.50667	4.13075	4.54744	4.40908	4.15604	5.07219	4.90317	4.6671	4.40671	3.73791	5.0577	4.65524	4.72069	4.97208	4.29758	4.87261	4.59974	5.20666
NIP7	6.08002	6.43034	NA	6.15267	6.23062	6.23448	6.21775	6.27873	6.74361	6.52631	6.39501	6.38707	6.45207	6.73908	6.33792	6.27561	6.34057	6.59884
PANK1	4.87185	4.96039	4.68124	5.43305	4.77827	5.41961	5.22928	5.45541	4.84037	5.04035	5.29151	5.41073	5.03012	5.04618	4.77439	5.42101	5.32463	5.41571
TLCD1	3.23477	3.54849	4.01901	3.11881	4.22848	3.93358	4.09288	3.64468	4.47976	4.35493	3.38654	3.75709	4.33065	4.40595	3.74609	3.92216	3.95638	3.90151
ARFIP1	4.3823	4.34495	4.38697	4.40143	4.29903	4.57084	4.54653	4.53473	4.29634	4.4299	4.68562	4.39963	4.49894	4.24242	4.3083	4.7082	4.40551	4.95104
2017-03-05	5.56926	6.1133	5.93168	6.35406	5.91435	6.20321	6.32188	6.53106	5.8763	6.00375	6.25591	6.2715	6.14789	6.05368	5.70109	6.25973	6.23678	6.54259
POLH	4.66605	4.5217	4.85772	4.64264	4.94323	5.22056	4.66969	5.83489	5.50797	5.17405	4.44272	4.6652	5.01948	4.74069	5.02852	4.76611	5.21748	5.7575
UBP1	7.58858	7.63085	7.43436	7.61616	7.36135	7.57195	7.78344	7.74061	7.48434	7.63815	7.57537	7.59262	7.66539	7.62925	7.64163	7.75535	7.59486	7.95611
CEP126	1.84746	1.76292	2.68788	2.2986	2.34405	2.59686	2.3967	2.76231	1.63295	1.88677	2.65252	2.15195	2.39551	2.8164	2.29911	2.32736	2.31782	2.86636
CEP85L	4.83775	4.51239	4.66283	4.31409	4.22963	4.86543	4.81132	4.89238	5.07815	4.60176	5.01372	4.91813	4.57842	4.66628	4.55239	4.79172	4.91057	5.2857
DNAJC3	NA	5.75312	5.85779	5.99225	5.8667	5.94148	6.13661	5.91675	5.91272	5.75704	5.89437	5.73586	5.95949	6.01405	5.83649	6.04617	5.96147	6.1239
KIAA1407	3.60989	3.94137	3.05469	4.05685	3.25688	4.14283	4.00567	4.13023	3.81817	3.89277	3.70759	4.07483	3.93448	NA	3.94038	4.0794	3.6747	4.26562
LOC100221111	2.90594	2.76501	3.38546	2.33957	3.15159	3.23265	3.20279	3.7088	3.10462	3.38887	3.4889	2.77386	3.20623	3.63485	3.08358	2.79752	3.62281	3.45847
LOC100232731	4.75591	4.75347	4.81134	4.57272	5.16383	5.2151	4.73926	5.19328	4.8439	5.29047	5.19784	4.72975	4.95131	4.85495	4.906	4.62781	5.08093	5.56023
RPF1	5.05032	5.13061	5.27341	4.74431	5.15745	5.2565	5.24959	5.40362	5.55036	5.20135	5.30505	5.45589	5.21922	5.45533	5.02279	4.96727	5.26818	5.65952
SNRPD1	7.00497	7.41517	7.1701	6.93988	7.15577	7.26244	7.25642	7.40599	7.22724	7.26655	7.37589	7.14109	7.30297	7.58398	7.24038	7.09496	7.34007	7.60527
STAM	5.10503	5.54332	5.28881	5.70671	5.14055	5.52206	5.66726	5.48807	5.33199	5.654	5.78668	5.69827	5.58381	5.46169	5.09211	5.78223	5.57273	5.8333
XPOT	6.46159	6.19642	6.35479	6.42597	6.35299	6.66433	6.54132	6.92235	6.43702	6.46671	6.52632	6.67498	6.61968	6.21672	6.20575	6.57423	6.52948	6.92661
CDS1	3.30229	2.59756	3.66952	3.10493	3.20686	3.74225	3.7706	3.78547	3.21795	3.005	3.47219	3.25564	3.32689	3.29375	3.27999	3.16645	3.62075	4.0043
IFT80	6.11957	5.37883	5.98801	5.4214	5.61184	6.20754	6.04739	6.66945	6.10542	5.98437	5.83233	6.13949	6.37227	6.2453	5.95452	5.90117	5.78831	6.38228
LOC100228427	4.49444	3.94788	4.75861	4.00063	4.39029	4.57589	4.4243	4.91561	4.44363	4.42293	4.55249	4.40931	4.43618	4.24738	4.59358	4.56718	4.56094	4.85349
LOC101233376	2.62375	4.12453	3.62174	4.10903	3.30407	4.33546	4.41211	4.73339	3.65585	3.81789	4.71019	3.90511	3.92899	4.27236	3.15591	4.568	4.39315	4.10197
NUP133	4.1443	4.15804	4.15911	4.02893	4.19396	4.50794	4.12306	4.56312	4.27168	4.1874	4.54164	4.22697	4.16403	4.06545	4.11438	4.28782	4.3025	4.78989
PSEN2	5.58566	5.80051	6.13719	5.84245	5.60498	6.08986	6.00292	6.25786	6.04779	6.20372	5.91712	6.11897	6.07557	6.00102	5.44551	6.06775	5.90656	6.56808
RNF146	6.25767	6.32665	6.2504	6.30007	6.30803	6.34775	6.34464	6.67834	6.23382	6.14769	6.59226	6.36748	6.24304	6.22926	6.54739	6.36604	6.48765	6.70197
SUMF1	5.2026	5.51066	5.50654	5.3077	5.55717	5.7011	5.69877	6.14776	5.83793	5.31165	5.64583	5.62961	5.92282	5.69674	5.32379	5.37366	5.61208	5.93061
ANXA11	5.25493	5.07663	6.07482	5.24674	5.43091	5.8691	5.86121	6.23141	5.24402	5.24343	5.65482	5.48732	5.7747	5.42461	5.81504	5.39723	5.71243	6.35812
LOC101233729	0.990683	2.69848	1.42803	2.96309	1.52918	2.78319	1.99778	3.23254	2.57094	1.52657	2.52499	3.13861	2.66296	2.32403	2.30095	2.23173	3.19545	2.64198
LOC101233923	1.47141	1.26836	1.45825	1.74108	2.42618	2.31405	1.80669	2.68817	1.77541	3.07223	1.49681	1.88005	2.9309	1.68441	1.64736	2.23649	1.9593	2.13993
MAFB	4.23532	4.39585	4.56181	4.77888	4.47588	4.7826	4.61703	5.03896	4.57841	4.45716	4.94573	4.7907	4.46409	4.4273	4.89462	4.938	4.91799	4.39851
PIP4K2A	5.39381	5.48583	5.53939	5.66026	5.45312	5.63516	5.69578	5.72603	5.43243	5.43676	5.85364	5.4379	5.50085	5.33275	5.55689	5.70119	5.7368	5.98598
TNS3	4.73066	4.65843	4.5726	5.06621	4.57279	4.65531	4.84889	5.1853	4.79953	5.14376	5.21913	4.83522	4.56475	4.73156	4.66271	5.24832	5.06239	5.19182
CUL5	6.26483	6.31183	5.90495	6.35223	6.0676	6.48744	6.5231	6.43492	6.34244	6.36531	6.35244	6.39355	6.46124	6.28234	6.03487	6.76807	6.44118	6.50261
KCNK1	5.53324	5.68093	5.72744	5.82831	5.53775	5.78362	5.62868	5.76632	5.87191	5.71247	5.805	5.80687	5.60642	5.51252	5.69792	5.72287	5.95411	6.03931
LOC100229115	2.23947	2.29924	2.35265	2.52977	1.69807	2.84386	2.05939	3.39726	2.00518	2.35446	2.70309	2.59182	2.55287	2.1262	3.68948	2.67313	2.37262	3.77971
MUT	5.62609	5.70419	5.91424	5.74485	5.74542	5.88768	5.69962	5.86041	5.99395	5.83324	6.03678	5.64983	5.96315	5.7384	5.89854	5.71296	5.74059	6.1089
CBFB	3.85975	3.59488	3.73681	3.88556	3.3293	3.79519	3.9569	4.30291	3.90446	4.02577	3.76312	4.13824	4.0625	3.88281	3.62227	4.28536	3.69394	4.32391
LOC100224275	5.63176	5.43829	5.78401	5.64165	5.65988	6.06884	5.74546	6.03568	5.77724	5.62835	5.56346	5.69396	5.98157	5.54712	5.81932	5.61253	5.78675	6.09242
MRPS14	6.98615	7.1229	7.07414	7.07661	7.13177	7.05039	7.09202	7.12329	7.26016	7.30778	7.14967	7.11585	7.33995	7.17387	7.10427	7.04036	7.19587	NA
PSEN1	5.46738	5.67201	5.28845	5.65119	5.3998	5.5537	5.60929	5.71898	5.57565	5.71987	5.68402	5.64691	5.7017	5.64425	5.30605	5.66173	5.6634	5.99186
TECR	3.23683	3.09379	3.6289	3.2695	3.33033	3.72063	3.61253	3.56791	2.60566	3.4347	3.92354	4.06615	3.8856	3.50668	3.33218	3.68764	3.24539	4.11662
TPBG	2.66624	2.89347	2.74373	2.90589	2.88287	2.34382	3.23065	3.05107	2.58164	3.27662	3.56513	NA	3.10458	2.98026	2.665	3.49776	2.94049	3.40196
DUSP12	4.82825	5.27177	4.48224	5.25425	5.19476	5.48901	5.29364	5.98497	5.41576	5.37011	5.03008	5.10024	5.29641	5.33075	5.05142	5.26924	5.16492	5.6832
MDH1B	1.61994	2.2808	1.52358	1.82402	1.87013	2.06921	1.72688	2.52716	1.80804	2.39134	2.39035	1.69573	1.7162	2.20166	2.34097	2.12065	2.0692	2.6494
SPATA17	1.57985	1.03162	1.54519	1.01833	1.51056	2.08894	1.2247	1.55501	1.56948	1.12956	1.42743	1.25434	1.62839	1.5359	1.49616	1.81624	1.62193	1.99355
TECPR1	6.46571	6.11281	6.29935	6.38943	6.22122	6.58949	6.33646	6.81879	6.47364	6.29399	6.45452	6.49728	6.56688	6.37896	6.26514	6.54092	6.60734	NA
CAMK2G	4.74405	4.73551	4.91633	4.90675	4.7465	4.86649	5.04251	4.83279	4.9021	4.67164	4.78396	5.08711	4.78876	4.66955	4.7458	5.08419	5.10074	5.21177
ELOVL4	5.3343	5.58645	6.15906	5.76492	5.48355	5.79054	5.95542	5.91858	5.68062	5.75626	6.07036	5.80977	5.86573	5.58081	5.61349	5.9123	5.79217	6.14712
GATAD1	NA	3.5991	4.04066	3.73454	3.95717	3.91826	4.32343	4.32054	3.32113	4.19118	4.26303	4.30037	3.98841	3.87251	3.54521	3.77295	4.33535	5.00932
LOC105758619	5.34999	5.28742	5.62787	5.23581	5.66057	5.38729	5.21789	5.35458	5.23676	5.63401	5.35412	5.39247	5.31771	5.53888	5.94221	5.47479	5.77134	5.91489
ATP6V1C2	2.38498	2.58007	3.54261	3.50608	2.53831	4.53915	2.75211	5.03978	4.35442	4.30255	3.05654	4.08364	3.0368	2.59943	3.21988	3.01534	4.03076	4.76753
CAB39	6.46047	6.77442	6.39897	7.02663	6.64289	7.01856	6.96116	6.99573	6.84334	6.95237	7.07365	6.97995	6.82523	6.48556	6.58916	7.03193	6.96282	6.87288
LOC100231803	1.57071	1.91609	4.69754	2.53937	2.47193	4.26535	4.62742	4.40344	4.28138	2.98405	3.55635	3.13535	4.34942	3.9981	2.8628	2.61358	2.87884	4.03886
ORAOV1	5.12962	5.14198	5.65467	5.28764	5.10785	5.50192	5.41823	5.61215	5.12782	5.30332	5.30812	5.92911	5.31405	5.38005	5.34439	5.61634	5.36258	5.68896
PPP1R21	4.67562	4.62759	4.83187	5.05842	4.67793	4.70317	4.98807	4.74052	4.65788	4.9162	4.98781	5.12607	5.03953	4.95076	4.50155	5.07957	4.76943	5.20874
PTDSS1	4.81094	5.12173	5.02985	5.47552	4.85195	5.34387	5.04609	5.2472	4.86237	5.15949	5.45651	5.08999	5.22464	5.00843	5.29579	5.26734	5.34838	5.34523
RGS7	5.635	5.17832	5.49928	5.52375	5.46556	5.58084	5.72548	6.00012	5.60231	5.60623	5.57182	5.89363	5.43288	5.29905	5.47195	5.9888	5.81937	5.71898
SH3BGRL2	6.83061	6.81868	7.00145	6.98315	6.99246	7.11185	7.17658	7.1264	6.87338	7.01165	7.41286	6.97273	6.62663	6.95651	6.84851	7.49151	7.21829	7.2456
TIMM21	5.18708	5.10392	5.45019	5.25122	4.89797	5.48973	5.14686	NA	5.43449	5.23962	5.25914	5.43152	5.3228	5.18405	5.33404	5.16399	5.46816	5.70432
ERV3-1	1.77318	2.01219	2.74182	2.59713	2.77812	2.20978	2.42662	2.79283	2.35043	2.56092	2.6458	2.62064	2.35793	1.68031	2.36121	2.72651	2.40363	3.33129
NIT2	5.63266	4.69123	5.0318	5.02993	5.40871	5.26433	5.28017	5.99335	5.05657	5.60583	5.33267	5.52021	5.38159	4.95182	5.92929	5.57253	5.22893	5.80683
SNW1	7.12493	6.74446	6.99183	6.88786	6.94628	7.13198	6.99042	7.07308	6.87054	6.88746	7.04178	6.96937	7.09018	6.8222	7.15262	7.03642	7.05747	7.35742
SVIP	6.9322	6.99221	7.10595	7.11698	7.06229	7.31389	7.15588	7.45295	7.00265	6.99094	7.18814	7.36916	7.04973	7.0539	7.08991	7.18426	6.98974	7.43344
TCERG1	6.64436	6.38294	6.56388	6.73672	6.4233	6.55607	6.5618	7.03629	6.5395	6.58447	6.53786	6.70068	6.58617	NA	6.67961	6.76402	6.68073	6.87527
GOLT1B	5.70781	5.59609	5.48559	5.71669	5.55801	5.75688	5.63968	5.80036	5.55308	5.73859	5.72112	5.86752	5.64221	5.8368	5.51789	5.74963	5.65041	6.0267
GUCY1B3	7.26356	7.31944	7.40838	7.4881	7.05252	7.35584	7.50824	7.88241	7.33254	7.39909	7.49805	7.6028	7.42207	7.24472	7.2841	7.76122	7.61713	7.68656
PDP1	5.69274	5.99941	6.34236	6.21507	5.89329	6.22291	6.23565	6.24157	5.85878	6.07757	6.31856	6.08325	6.01489	5.89506	5.81472	6.30146	6.44926	6.74316
PRR5	3.87378	4.09882	4.38448	3.8207	3.96322	4.36892	4.16529	4.60703	4.28534	4.03871	3.93433	4.52917	4.03211	4.25666	4.25677	4.1854	4.18249	4.60982
R3HCC1L	3.73617	4.07739	4.41322	4.01771	4.2115	4.22879	3.93629	4.42747	3.99808	4.2279	3.88732	4.16185	4.12709	4.38957	4.21483	3.96311	4.28236	4.8523
USMG5	8.28762	8.53208	8.23732	8.50612	8.41079	8.46681	8.49831	8.88465	8.61385	8.59117	8.46839	8.77014	8.39747	8.75982	8.28387	8.59651	8.51032	8.69782
ANAPC4	5.43608	5.03014	5.32554	5.26844	5.20609	5.46749	5.3968	5.49143	5.26335	5.28411	5.07092	5.40127	5.33254	5.24944	5.4513	5.28528	5.49286	5.73096
C2H7orf25	4.47084	4.04659	4.35948	4.26258	4.53157	4.56984	4.33894	4.76223	4.42303	4.52497	4.12708	4.67409	4.46809	4.44687	4.17848	4.52448	4.39957	4.93199
LOC101233414	5.04004	5.31225	4.7376	5.21599	4.82635	5.10025	5.40058	5.16664	5.38906	5.08799	5.33774	5.33911	5.3464	5.26259	4.85888	5.59258	5.23378	5.50951
LOC105758581	6.22718	6.01983	5.70301	6.30557	6.18495	6.73335	6.60582	6.14056	6.38208	6.40221	6.47914	6.3861	5.94948	6.36067	5.96287	6.27685	6.48623	6.58141
LOC105759249	1.19871	1.6507	1.73711	1.28203	2.81111	1.30139	1.62207	1.62445	1.91705	2.06722	1.86725	1.46901	1.46429	2.6524	1.62634	1.2644	2.55313	3.55669
PSMA6	7.22214	7.52776	7.32228	7.40869	7.55811	7.45583	7.31976	7.46951	7.54032	7.76659	7.33579	7.54011	7.49801	7.70782	7.50324	7.35691	7.36308	7.84625
RPUSD2	2.44196	2.48947	2.61921	2.90965	3.00896	2.74053	2.9606	3.12628	3.1516	3.28814	2.90936	2.86261	2.90759	3.26804	2.51136	2.05347	2.946	3.71627
ATP6V1H	7.00553	6.93055	7.05124	7.19849	6.85639	7.32187	7.16546	7.23193	6.93961	7.1565	7.23173	7.0023	7.37219	6.88863	6.97935	7.04462	7.33436	7.46371
CCDC132	5.29551	5.26357	5.42413	5.43233	5.23172	5.44519	5.40863	5.5024	5.3323	5.32022	5.62567	5.56525	5.32392	5.22285	5.27489	5.51372	5.36205	5.79995
MAPRE3	6.88245	7.10867	7.13556	7.3169	7.33641	7.02009	7.21074	6.87007	7.38087	7.24251	7.08679	7.15362	7.29551	7.28261	7.04276	7.2907	7.19034	7.47669
RAB5A	6.84917	7.00926	6.86313	7.14224	6.80763	7.01089	7.11455	6.95755	6.96387	7.05779	7.27725	6.97513	7.06743	7.04472	6.75036	7.11235	7.07568	7.32581
TMEM5	5.46011	5.45819	5.74257	5.87794	5.42377	5.89187	5.79196	6.2138	5.63409	5.57584	6.36825	5.8091	5.73135	5.45027	5.62043	5.73991	5.68953	6.33801
CNOT7	6.20264	6.25545	5.95203	6.30885	5.96924	6.36824	6.25766	6.35225	6.1507	6.25947	6.41358	6.43123	6.24832	6.12745	6.25685	6.42694	6.12514	6.59355
TRIM59	5.35854	5.31371	5.31273	5.09802	5.72632	5.3529	5.54008	5.45333	5.68017	5.93287	5.6836	5.31326	5.39343	5.48635	5.14884	5.79866	5.37757	5.97962
CLDND1	6.46512	6.85097	6.27715	6.68002	6.52542	6.54901	6.58528	6.75021	6.78419	6.5397	6.77847	6.875	6.92404	6.77514	6.50697	6.71673	6.63476	6.98992
HADH	4.92276	4.58673	4.6583	5.04409	4.55701	5.01835	5.075	5.19682	5.07361	4.74143	5.1815	4.70768	5.10258	4.91821	4.6517	5.07476	4.85206	5.27817
LOC101233980	0.137304	0.0196497	0.776815	1.56745	5.90178	6.87334	0.862378	6.81575	5.73135	1.16813	6.99325	0.0204683	5.67894	0.600944	0.700339	1.21891	6.89939	6.00136
PCDH8	3.16468	3.13928	3.55047	3.40893	4.17093	3.79022	3.60962	3.54099	3.7472	2.84699	3.91283	3.42644	3.70858	3.79846	3.23197	3.30922	3.7613	4.29556
TCEB1	6.88501	7.20642	7.08258	7.21404	6.95198	7.29781	7.21985	7.36781	7.01377	7.30322	7.42614	7.32525	7.2979	6.98813	6.87577	7.38591	7.17131	7.54437
TMCO3	4.82974	4.75569	4.9269	5.01634	5.26957	5.47763	5.41175	5.55367	5.22613	5.27708	4.9987	5.11387	5.02069	4.82166	4.64293	5.10378	5.34926	5.54538
TRMT10C	4.68276	4.46633	4.54875	4.83017	NA	4.89375	4.825	4.58725	4.69548	4.75788	4.54795	4.67531	4.69427	4.43253	4.69313	4.97976	4.85746	4.94569
LOC101233268	3.60831	4.12494	4.49518	4.13123	4.01284	4.55558	4.57976	4.23908	3.82052	3.95023	4.80838	5.13819	4.16534	4.58231	4.27539	3.70521	4.28369	5.16343
LOC105760036	2.17315	1.79855	2.7882	2.47767	2.63823	3.09448	2.4725	3.26086	2.99796	3.61688	2.44103	3.09775	2.67438	2.31109	2.08479	2.66983	3.08113	2.76585
TMEM33	4.9773	6.24462	5.11643	6.40654	5.55059	6.17999	6.11979	6.52117	5.73217	6.33486	6.54337	6.44023	6.27767	6.10096	5.01461	6.14797	6.11767	6.58259
ZNF507	4.2121	4.36749	4.50688	4.61111	4.46566	4.85738	4.73115	4.67452	4.39169	4.36699	4.62014	4.58755	4.49855	4.32704	4.26323	4.46821	4.70511	4.94652
LOC100222729	6.56153	7.28379	6.67866	7.14567	7.02689	7.49424	7.52726	7.56861	6.97818	7.25729	7.25797	7.15671	7.39006	6.98618	6.63065	6.91029	7.44473	7.8171
PUS10	4.19849	4.18074	4.419	4.33882	4.38441	4.76528	4.08743	5.2421	4.75091	4.42437	4.48029	4.68956	4.40758	3.97456	4.26573	4.41789	4.78323	5.24301
RCBTB2	5.6886	5.56327	5.75499	5.67762	5.41589	5.70277	5.72612	5.92785	5.63648	5.71753	5.97054	5.89301	5.64627	5.48415	5.6037	5.95252	5.85118	6.03405
RPS11	8.74855	9.0411	8.59329	8.86785	8.94476	8.74895	8.73302	8.83604	9.13835	9.18018	8.8295	9.00006	9.26439	9.16181	8.90569	8.87874	8.88997	9.24462
FAM35A	3.03904	2.18615	3.02596	3.12044	3.09178	3.471	3.4552	3.07757	3.07492	3.01031	3.40776	2.93227	3.51344	2.70886	3.11768	2.91824	2.80273	3.46014
LEPROT	4.53864	4.79431	4.6599	5.13661	4.53481	5.11271	5.00997	5.36023	4.47205	5.16505	5.12808	4.95062	4.8076	4.93098	4.3044	5.25136	5.03617	5.65545
LOC100217892	4.11233	3.91221	4.69972	4.10741	3.68739	4.70234	4.94433	5.21742	4.17272	4.08473	5.23892	4.48965	5.04151	4.14955	5.01492	5.07148	4.73999	4.15655
LOC105758961	3.94536	4.68258	4.4309	4.75383	4.32934	4.73096	4.87719	5.44018	4.45039	4.60435	5.02119	4.87434	4.80989	4.19893	4.0566	4.90135	4.99294	5.17588
NME6	4.66978	4.47534	4.13871	4.30172	4.46341	4.94293	4.52624	5.07699	4.92667	5.23667	4.40577	4.8706	5.00628	5.25768	4.52487	4.7096	4.4724	4.89658
PAXBP1	6.87199	6.41839	6.57742	6.48894	6.68432	7.08511	6.85967	7.16879	6.67144	6.72727	6.92533	6.85917	6.78615	6.57025	6.55458	7.0983	6.77037	7.01043
RNF141	4.76852	5.06992	4.91695	5.24853	4.67459	5.416	5.24106	5.34105	4.84812	5.03164	5.56746	5.20061	5.16822	5.21583	4.78524	5.30703	5.0856	5.41033
SGCE	6.8578	6.7057	6.70122	7.03765	6.61425	6.8116	6.9833	7.12252	6.67743	6.65749	6.98743	7.29128	7.05318	6.87196	6.8157	7.11757	6.81596	7.15945
WDR47	5.1164	5.49469	5.39103	5.75094	5.3036	5.51374	5.59479	5.87909	5.44575	5.40042	5.81851	5.71024	5.39503	5.28144	5.23286	5.62572	5.67806	5.99666
XIAP	5.48377	5.36661	5.48729	5.73942	5.33677	5.52672	5.69918	6.10797	5.38986	5.38374	5.67061	5.8453	5.74121	5.43138	5.3113	5.76388	5.75394	6.05946
B3GALTL	3.44547	3.6279	4.44883	3.71833	3.96366	4.34162	4.18918	4.65818	4.08372	3.41514	4.54939	4.32334	4.01679	3.45427	4.11879	4.09882	3.87003	4.82853
CEP89	3.60004	3.72996	4.70548	3.95995	3.70089	4.51687	4.66322	4.92194	3.63012	4.9563	4.63131	4.50515	4.48464	4.37137	3.73872	3.91623	4.4615	4.81463
FAM49B	6.3413	6.78395	6.69325	6.95799	6.60315	6.65214	6.70639	7.19179	6.57246	6.9244	6.77376	6.84279	6.79899	6.64515	6.53482	7.10988	6.80679	7.13592
NDUFB2	7.71338	8.27966	8.02485	8.11113	8.07302	8.2621	8.08621	8.76207	8.39304	8.48758	8.20706	8.49186	8.37523	8.40061	7.83265	8.05769	8.00686	8.82318
NUP153	NA	5.17155	5.20235	5.39298	5.24653	5.27456	5.33117	5.20653	5.19507	5.1606	5.24159	5.30171	5.25385	5.20474	5.28228	5.39575	5.28034	5.42452
PAMR1	1.13802	1.3763	1.00761	1.24016	1.59994	1.90481	1.25325	1.92644	1.49273	1.43139	2.12443	0.742449	1.5042	1.76868	1.1965	1.39195	1.5796	2.22301
STX11	1.65358	1.03949	2.9337	0.721014	1.20098	2.34001	2.09184	2.75485	2.92861	2.10419	2.20044	1.89765	3.29859	2.00132	1.46826	2.25771	1.48603	3.29457
TMX2	7.31989	7.42398	7.77824	7.37464	7.81254	7.6778	7.47471	7.39889	7.77121	7.54151	7.48987	7.4017	7.58247	7.76651	7.6858	7.49028	7.62241	7.94349
C8H1orf52	4.10843	4.64214	4.80907	4.79663	4.84691	4.5347	4.8878	4.82981	4.2491	5.0323	5.24947	4.81198	4.95793	4.60814	4.30931	4.78047	4.66942	5.45299
DIRC2	4.10099	3.81104	4.34256	4.14299	3.89666	4.17972	4.18454	4.1244	4.07297	3.95185	4.19124	3.98581	4.13911	4.27204	4.08598	4.02127	4.32623	4.59554
LGI2	5.32702	4.95146	5.18381	5.00132	5.19544	5.46411	5.40525	5.15424	5.30353	5.29583	5.628	5.38171	5.14039	5.06726	4.99042	5.84385	5.50072	5.39655
RHOBTB1	3.18981	3.61423	3.84994	3.83544	3.80111	3.75254	3.89491	4.05707	3.62279	3.47609	4.11926	3.64278	3.68983	3.32499	3.49066	3.87913	3.94574	4.34647
RNF149	5.49764	5.89628	5.78179	5.89115	5.59057	6.02745	5.9821	6.09376	5.7205	5.8565	6.23189	6.09304	5.86531	5.66098	5.54577	6.07028	5.94615	6.16478
TNFRSF11B	4.07508	3.75772	3.68095	4.00194	3.81369	3.70355	3.96111	3.56311	4.04241	3.99015	4.12057	NA	4.20459	4.37924	4.03128	4.05593	3.77856	4.39439
ANKRD22	3.3575	2.55446	3.35872	2.84497	3.05801	2.87024	3.78627	3.80237	2.43902	3.68975	3.78578	4.00621	2.81898	3.99852	3.042	3.82358	3.10838	4.04909
ARHGEF7	5.45743	5.59312	5.48255	5.721	5.48315	5.65506	5.73764	NA	5.55944	5.94734	5.85636	5.47287	5.633	5.45576	5.39361	5.89305	5.74774	5.98905
C3H1orf131	3.97951	3.82688	4.08944	4.41113	4.02208	4.75232	4.0694	4.70044	4.29577	3.60407	4.24921	4.60554	4.23297	4.0672	3.77907	4.13897	4.7854	4.93842
FBXO30	3.92297	4.25631	4.09535	4.26998	3.89754	4.11561	4.15723	4.2383	4.1808	4.09204	4.39022	4.09269	4.25038	4.04239	4.00086	4.21324	4.34782	4.64637
HRASLS	7.32401	7.69215	7.62037	7.5588	7.44453	7.41595	7.47028	7.80046	7.66919	7.70429	7.66076	7.65899	7.64113	7.70193	7.44109	7.78641	7.55289	7.87687
NINJ1	5.42315	5.52705	5.70912	5.69693	5.60569	5.50086	5.67426	5.91632	5.59555	5.27312	5.62417	5.72282	5.69356	5.65541	5.77295	5.75296	5.5014	6.0443
TBC1D31	3.49693	3.81543	3.5886	4.14898	3.44062	3.5588	3.89538	4.30954	3.36983	4.00014	4.11864	4.12128	3.84074	3.6662	4.06008	4.09057	3.59312	4.54272
UCHL3	6.02715	6.21317	6.02572	6.28134	6.16193	6.39233	6.33415	6.45439	6.19008	6.21302	6.48119	6.44434	6.08841	6.3824	5.98055	6.33477	6.10721	6.54698
CRYBB2	1.19498	1.73853	2.20032	0.803979	1.45705	1.68229	1.09001	1.88631	1.85263	1.64199	1.85601	2.16899	1.62287	2.10429	1.96212	1.75369	1.48893	2.53663
LOC100219908	5.83414	6.02232	5.76004	6.25435	5.97882	6.11829	6.43045	6.39393	6.20177	6.3184	6.65926	6.60951	6.35297	5.71872	6.0068	6.73988	6.14079	6.05717
MYCBP	6.20625	6.41048	5.92552	6.17735	6.59041	6.45999	6.60356	6.84708	6.4798	6.8004	6.3327	6.66147	6.64936	7.14426	6.33754	6.61491	6.46423	6.26809
SLAIN1	5.23452	5.09531	5.2071	5.23393	4.85529	5.28906	5.1886	5.42442	5.10144	5.1193	5.22264	5.12581	5.25492	5.11354	5.21443	5.33152	5.43573	5.6422
TULP3	5.4738	5.55023	5.54583	5.56875	5.58631	5.64983	5.51413	6.04354	5.56049	5.49936	5.91086	5.51654	5.68292	5.44312	5.60739	5.88559	5.51667	6.03475
ACTR6	6.44512	6.48091	5.89245	6.57205	6.28912	6.57372	6.38918	6.63305	6.18825	6.91222	6.75303	6.74099	6.50525	6.24352	6.4214	6.68074	6.5526	6.89079
GYG2	4.47206	3.58778	4.51111	3.69814	4.15317	4.75957	4.47067	5.32323	4.4433	4.71495	4.04	4.87293	4.55524	3.68618	4.45691	4.57571	4.43119	5.07312
HIBADH	6.07236	5.96161	5.79363	5.9912	5.61885	6.00161	6.10443	5.98237	5.89463	6.17037	6.13145	6.28376	5.97532	6.01815	5.91038	6.23953	5.97167	6.40056
LOC100230612	7.21501	7.39624	7.09196	7.28812	7.22321	7.29177	7.19127	7.35708	7.28198	7.34495	7.27319	7.47202	7.33144	7.26822	7.34713	7.46519	7.19105	7.54205
PDZD7	3.79187	4.54161	4.32578	4.49458	4.50063	4.29065	4.29545	4.76421	4.3437	4.41045	4.50567	4.42497	4.33356	4.39312	4.22091	4.19661	4.53291	5.10644
ZNF654	4.00705	3.77614	3.87953	4.07195	3.71781	4.14656	4.29514	4.16697	3.76728	3.98539	4.1603	4.04735	4.05797	4.1465	3.90443	4.0204	3.87125	4.40347
ATP9B	4.84385	4.84594	4.90537	5.29751	4.74802	5.03715	5.29441	5.40017	5.02191	4.88729	5.25492	5.07377	4.87003	5.06905	4.5854	5.42449	5.33318	5.43896
PCNP	6.82796	6.76821	6.94717	6.99294	6.85348	6.72845	6.89433	7.14356	6.73453	6.77586	7.00223	6.98275	6.87358	6.80723	6.99137	7.14199	6.90194	7.1974
TMEM138	6.31447	6.71137	6.66335	6.7115	7.23864	6.59252	6.5926	6.95693	7.23608	6.87067	6.39396	6.738	6.77043	6.89018	6.78266	6.68662	7.05925	7.11251
DNAJB12	4.87055	4.96467	5.07167	5.19417	5.25339	5.26059	4.91702	4.89868	5.34401	5.12788	4.91109	5.18734	5.1199	5.37557	5.29272	4.9497	5.02113	5.45054
RBM12B	4.73137	4.61304	4.72995	4.73112	4.56407	4.96526	4.82851	5.19763	4.71132	4.85124	4.8851	5.01053	4.7463	4.59056	4.92092	4.90838	4.6002	5.11275
AGT	8.99502	9.01771	9.16295	9.26472	9.1194	9.18895	9.09416	9.53559	9.54509	9.39003	9.20433	9.01194	9.25846	9.23429	8.91203	9.16167	9.35495	9.53453
LOC100189983	5.91225	6.50972	6.07113	6.4123	6.14678	6.25373	6.14933	6.383	6.28501	6.4255	6.66208	6.76123	6.50585	6.46837	6.34157	6.09602	6.21572	6.68436
LOC100224607	1.39329	2.06178	2.25303	1.8726	3.00296	2.85367	2.21935	2.97006	2.36999	2.97551	2.73989	2.13553	2.77366	2.53237	1.46488	1.71837	2.35638	3.45552
MKRN2	4.86001	4.90322	5.08409	5.08897	5.22944	5.02465	4.92289	4.83134	5.02256	5.18658	5.06052	5.31183	5.15506	5.23116	5.16123	4.74338	5.15561	5.31655
VPS4B	5.564	5.5335	4.95493	5.46014	5.0454	5.41516	5.71462	5.67152	5.52732	5.54168	5.58625	5.75649	5.65534	5.71826	5.16263	5.96626	5.62241	5.76625
VTA1	5.58496	5.79473	5.97376	5.97302	5.7214	6.03864	5.70671	6.19651	5.98136	5.83488	6.07326	5.77563	5.96896	5.71918	5.99625	5.91561	6.07967	NA
COX6C	10.4192	9.96466	10.3179	9.87175	10.0108	10.4708	10.2316	10.6887	10.1918	10.4878	10.3671	10.4468	10.4518	10.4625	10.0237	10.3109	10.3003	10.6705
LOC100232247	3.10738	2.79546	3.20946	3.20615	2.91205	2.84806	2.95411	3.25639	3.13797	3.35021	3.37535	3.58868	3.11248	2.96566	2.85542	3.22943	3.22584	3.68082
RBL1	3.03137	3.04482	3.49667	3.26903	3.02036	3.72103	3.34961	3.73268	3.34718	3.67815	3.5844	3.25239	3.51774	3.18887	3.11499	3.3473	3.50755	3.43862
SORBS2	6.76105	6.7924	7.15578	7.22921	6.88418	7.21201	7.24545	7.454	6.88642	7.03077	7.07082	7.15122	7.04251	6.98755	6.71437	7.13398	7.20877	7.39456
TANK	3.52818	3.9457	4.21751	4.28359	4.1597	4.02012	4.06664	4.60387	4.10089	3.86928	4.30061	4.18038	4.0517	3.62651	4.22806	4.35563	4.16604	4.37669
VTI1A	5.77931	5.60655	5.90602	5.6914	5.59025	5.78396	5.82148	6.02108	5.51774	5.6864	5.87681	5.87196	5.69708	5.62168	5.88672	6.02753	5.85169	6.17778
INPP5F	4.10229	4.20889	4.08171	4.36161	4.32523	4.48028	4.27922	4.38405	4.17431	4.15877	4.37874	4.04356	4.35958	4.45468	4.17135	4.07161	4.66411	4.54778
PRPH	1.75784	1.36911	1.74098	1.00445	1.6502	2.21215	2.49719	2.36896	2.38505	2.91883	1.82321	1.8575	1.93473	2.39308	1.43227	1.74579	2.0955	2.10719
TMEM177	2.92525	3.72542	3.45152	3.69471	3.92219	3.36175	3.63485	4.07319	3.6066	4.13477	3.49396	4.14011	3.7102	3.52408	3.59566	3.86157	3.31177	4.12013
ADGRG4	3.0133	2.96622	3.19695	2.63506	2.67479	3.25359	3.2154	NA	3.28493	3.12116	3.07517	2.85258	3.5554	3.18069	3.05501	3.21007	2.9222	3.54636
AGPAT1	1.01455	1.63597	0.67141	1.93497	1.28967	2.63302	1.3377	2.09914	2.28411	1.74653	2.21653	1.96	2.74279	2.53823	1.46994	0.857811	1.74317	2.04219
COMMD2	5.75733	5.85857	5.63142	5.78633	5.65886	5.90131	5.7712	6.10345	5.82909	5.97054	5.71649	6.11514	5.94991	5.95582	5.71401	5.90948	5.64277	6.3432
FAM76B	4.50032	4.55872	4.22937	4.52201	4.3744	4.63771	4.5765	4.65456	4.49774	4.84727	4.62736	4.5551	4.4939	4.68924	4.37159	4.72361	4.49991	4.77227
PLEKHA7	2.99086	2.66264	3.04294	3.0103	2.44278	3.34563	2.89856	3.58387	2.98455	2.84883	3.44575	3.1202	3.02154	3.3217	2.73872	3.12875	2.95921	3.59309
PNPLA8	6.10148	6.02755	6.072	6.22582	6.00363	6.31333	6.20507	6.31283	6.01989	6.25041	6.3099	6.28489	6.09571	5.81327	6.10813	6.24388	6.34718	6.4915
PSMA4	7.99489	7.29749	7.8835	7.61324	7.47086	7.99317	7.87065	7.99898	7.71163	7.85219	7.6355	7.84563	7.85724	7.63884	7.949	7.97168	7.76187	8.13912
RAP1GAP	5.19749	5.12978	5.30764	4.88108	5.32227	5.31114	5.18829	5.48247	5.47963	5.39312	5.04189	5.12636	5.2161	5.34486	5.22655	5.30599	5.25034	5.7162
UGGT1	5.15897	4.93368	4.93169	5.11007	4.91816	5.16226	5.14577	5.01576	5.11578	5.09685	5.08306	5.01667	5.242	NA	5.08147	5.13089	5.01467	5.23071
CCDC53	5.09508	5.57687	5.60096	5.77371	5.47687	5.60479	5.65282	5.72798	5.49394	5.58203	5.83606	5.81574	5.61418	5.29821	5.44032	5.58225	5.57924	5.90148
GAD1	8.27162	8.28866	8.69269	8.59809	8.40451	8.68919	8.88369	9.03115	8.4072	8.41942	8.953	8.69225	8.49656	8.24057	8.2706	8.93853	8.73277	8.8806
LOC105760092	7.57617	8.12755	8.11298	8.58092	7.74312	8.40568	8.42569	8.78829	7.85361	8.46346	8.50991	8.41095	8.4587	8.05646	7.85897	9.01083	8.5608	8.18336
INTS10	4.50062	4.58303	5.07283	4.46578	4.55057	4.85439	4.57147	4.90494	4.66138	4.6452	4.8339	4.65807	4.73984	4.63339	4.68465	4.69472	4.81461	5.28989
POT1	2.44599	2.92896	2.85027	3.25246	2.9239	2.80832	2.96956	3.19488	2.86215	2.93047	3.29316	3.16737	3.15125	2.61549	2.72624	2.88933	3.14728	3.29626
SNX7	2.41513	2.39737	2.65166	2.7693	2.56557	2.95737	2.73954	NA	2.62744	2.81746	2.71328	2.86681	2.47001	2.56461	2.60707	2.67778	2.3297	3.14797
ACBD5	5.72014	5.71604	5.59328	5.80819	5.45382	5.97547	6.10049	5.8385	5.55686	5.77458	6.25284	5.85969	5.86843	5.83513	5.42899	6.00308	5.80052	6.31674
AS3MT	2.61119	2.58071	3.50755	2.31347	2.7397	2.745	2.93428	3.1358	3.04244	3.20031	3.19085	3.05873	3.39601	3.6662	2.8151	2.56324	2.5134	4.02955
LDLRAD3	2.23015	2.66578	3.77254	3.19099	3.2717	3.49126	3.34493	3.81689	2.94975	2.0598	3.76141	2.58142	2.90884	3.17633	3.77907	3.36404	3.17645	4.11319
LOC100190204	7.17135	6.66726	7.44515	7.13956	7.06501	7.11447	7.19887	7.08382	7.18731	6.86716	7.21474	7.22406	6.74546	6.98289	7.79673	7.39007	7.50066	7.57469
LOC105758688	4.54217	5.15582	4.43124	4.93068	4.53892	4.75835	4.76126	4.87053	4.67947	4.9992	5.15128	4.95099	5.09829	5.01241	4.91752	5.18543	4.54696	5.35316
SLC19A2	3.55007	3.87716	4.12116	3.80633	3.86632	4.03732	3.83974	3.77169	4.05853	3.79597	3.96503	3.77377	3.63681	4.05455	4.08933	3.77121	3.97098	4.48869
CSAD	4.44451	4.34788	4.76928	4.45287	4.46493	4.859	4.96136	5.33189	4.77246	5.02242	4.59693	5.09814	4.9032	4.58616	4.36908	4.43551	5.05061	4.86728
DEPDC7	4.30385	4.0104	4.52472	3.89427	4.1395	4.3266	4.20719	4.3469	4.53883	4.27253	3.9288	4.39619	4.7774	4.81845	4.15608	4.2262	4.34855	4.87631
ITFG1	9.09767	8.84616	8.95427	9.07779	8.89215	9.22067	9.22914	8.90162	8.89951	8.66297	9.13552	9.14732	9.23221	8.89425	9.26454	9.19639	9.20092	9.26716
LOC100190014	8.87948	8.91786	9.08617	8.64151	9.22265	8.97805	8.98585	8.82053	9.23698	9.08954	8.88362	8.85897	9.16914	9.19659	9.15553	8.87573	9.06474	9.33246
MKRN2OS	4.50216	4.63254	4.82086	4.9865	4.19285	4.61131	4.51713	5.38194	4.97752	4.90429	4.41878	5.12061	4.94774	4.78131	4.71976	4.86388	4.87278	5.41684
RABGGTB	6.92153	6.98639	6.93892	7.03976	6.92564	7.1067	6.98249	7.15096	6.9825	7.1827	7.14309	7.19157	6.91255	7.00019	7.05734	6.97962	7.0733	NA
TMEM128	NA	3.9286	3.75681	4.47559	3.73732	4.09603	4.00512	4.54369	3.88472	4.04449	4.27509	4.26832	4.09664	3.79923	4.09759	4.71574	3.99354	4.64328
ARFGEF1	5.19268	5.16866	5.33593	5.25962	5.22984	5.4326	5.38016	5.36738	5.2247	5.18949	5.41489	5.04872	5.30062	5.03481	5.36257	5.54006	5.46996	5.52066
FMR1	5.96733	6.12402	5.90806	6.28717	5.91038	6.22822	6.32722	6.41784	5.98206	6.22749	6.26304	6.33743	6.12558	5.98863	5.80257	6.43866	6.28975	6.48067
LOC100220542	6.38123	6.77905	6.70548	6.51878	6.955	6.62813	6.67101	6.87458	6.82701	6.68163	6.57832	6.7362	6.6816	6.81259	6.91274	6.38912	6.85491	7.18264
LOC105760511	1.8403	2.89969	1.39481	3.33972	2.69904	2.9869	2.82657	2.75093	3.91613	3.51845	2.9675	3.37034	2.86251	4.03094	2.99817	2.8229	3.09342	2.25997
LPGAT1	6.22456	5.74452	5.8305	5.79038	5.94444	6.04048	6.08515	6.00189	5.9926	6.06796	6.17254	6.05405	5.97852	5.96634	5.82429	6.27838	6.00096	6.25988
NMD3	4.49199	4.70785	4.59477	4.50927	4.76691	4.87195	4.7995	4.92373	4.84931	4.55415	4.56731	4.97568	4.92495	4.98384	4.94513	4.449	4.51104	5.01125
PDE6G	1.67049	2.03506	3.18712	1.18206	3.36775	3.23727	3.00589	3.42937	3.49997	2.13277	3.94531	0.858788	2.36871	3.63641	4.32346	3.40972	3.25516	2.66156
TM9SF3	6.1076	6.33117	6.20352	6.53234	5.93221	6.51965	6.53671	6.52896	6.31162	6.41346	6.56498	6.62825	6.32603	6.23703	6.02794	6.61993	6.43263	6.65018
CDC42SE2	6.9968	7.38644	7.21574	7.52183	7.22749	8.1004	7.92241	8.17055	7.43509	7.80022	7.87586	7.84956	7.78313	7.58782	7.02767	7.78072	7.75051	7.32763
HEATR5A	3.66877	3.47294	3.82146	3.63569	3.49955	3.6147	3.84024	3.92702	3.82816	3.7357	3.73534	3.88785	3.74471	3.29544	3.47589	4.06201	3.92474	4.13793
LOC105759506	3.48627	3.47352	3.44415	3.70946	3.73557	3.73972	3.92455	4.28575	3.31111	3.25081	3.6078	4.26696	3.46854	3.43826	3.49955	3.94687	3.80364	4.4733
SHISA4	3.05022	3.45086	3.48968	3.55579	3.74258	3.99464	3.80989	3.73305	3.86885	3.17251	4.0813	3.55219	3.78055	4.13724	3.14028	3.6484	4.26777	3.4453
TMED5	5.14379	5.65108	5.20647	5.77075	5.31261	5.6355	5.62421	5.72432	5.62966	5.77227	5.91883	5.74527	5.55555	5.31742	5.29085	5.76454	5.48796	5.84467
TTLL1	5.98876	6.27592	6.38854	6.44254	6.20348	6.30358	6.43129	6.37288	6.10235	6.49081	6.65649	6.53006	6.28686	6.04788	6.21012	6.34898	6.42121	6.67736
USPL1	5.43644	5.52668	5.37244	5.65447	5.40203	5.68191	5.64452	5.75668	5.26971	5.55064	5.66088	5.90697	5.51078	5.60942	5.36828	5.84791	5.59571	5.77362
CCNE1	3.04082	3.37673	3.25982	2.97561	3.28582	3.3397	3.22878	3.44954	3.69813	3.32667	3.65613	3.82015	3.08504	3.61461	3.17955	3.26836	3.24687	3.62867
CFAP20	6.37545	6.58298	6.39178	6.46094	6.7938	6.48388	6.36628	6.76201	6.71022	6.63333	6.34449	6.67847	6.69043	6.96321	6.36974	6.6934	6.46909	6.98363
ULK4	1.76603	1.33872	2.23537	1.40471	1.30625	2.18414	2.23432	2.43783	1.77307	1.65185	2.28028	1.61069	1.66832	2.00996	1.44558	1.76667	2.27339	2.79091
WRN	4.45218	4.22678	4.17571	4.46024	4.33515	4.60978	4.42927	4.62817	4.46022	4.66678	4.39756	4.29923	4.29286	4.3663	4.43998	4.47243	4.26709	4.96197
IREB2	6.13676	6.1094	6.21516	6.17274	6.17583	6.36269	6.22215	6.2916	6.07346	6.07011	6.16183	6.22838	6.16826	6.08571	6.22241	6.22694	6.22771	6.50747
LHFPL3	4.51208	4.43003	4.78243	4.63705	4.42053	4.93369	4.86318	4.98584	4.7764	4.53897	4.82323	4.86216	4.77884	4.54065	4.28622	5.02366	4.61698	5.0255
NAMPT	5.42856	5.50627	4.7405	5.5516	5.14865	5.60844	5.62532	5.35095	5.30433	5.46787	5.51507	5.93578	5.50342	5.51883	5.19397	5.68271	5.58243	5.7594
RAD21	6.36683	6.63535	6.57299	6.68267	6.5132	6.67251	6.7811	6.90379	6.55977	6.44478	6.83804	6.86983	6.53932	6.51137	6.30141	6.73459	6.78782	7.09926
RPSA	9.09051	9.28197	9.01729	8.9869	9.18136	9.22531	9.11443	8.84123	9.56041	9.45705	9.111	9.23879	9.37925	9.34125	9.03183	9.45566	9.34168	9.44818
SPIRE1	5.7258	5.65064	5.44821	5.62379	5.75057	5.61981	5.70193	5.88507	5.72425	5.49528	6.06094	5.4897	5.92718	5.71396	5.59356	5.71936	6.04757	5.96319
TMEM135	4.11664	4.35171	4.31879	4.2711	4.31993	4.66171	4.52117	4.70839	4.35412	4.37946	4.50529	4.65367	4.37682	4.23187	3.99496	4.43266	4.42331	4.81837
COG5	5.17489	5.1202	5.09611	5.32801	5.24129	5.33276	5.12981	5.58281	5.24953	5.50977	5.5306	5.05411	5.28495	5.20161	5.31793	5.23681	5.14491	5.64087
HAT1	5.40724	5.07282	5.31942	5.29566	5.28298	5.70179	5.35189	5.44648	5.16427	5.52168	5.52443	5.43953	5.26862	5.14474	5.42635	5.30662	5.37632	5.77325
LOC101233142	4.17935	4.19971	3.98705	4.35281	4.10942	4.42444	4.32947	4.47051	4.05178	4.40004	4.20082	4.53202	4.24656	4.09439	4.02237	4.42287	4.27576	4.76636
RCOR3	4.33527	4.4368	4.81774	4.69708	4.67674	4.4828	4.63643	4.81788	4.47273	4.22929	4.81169	4.55756	4.56338	4.4164	4.62445	4.8074	4.85713	4.99701
CHP1	7.61615	7.4094	7.78416	7.45015	7.51914	7.68015	7.68936	7.79234	7.7072	7.70102	7.74168	7.55937	7.97525	7.54144	7.54564	7.75094	7.70028	NA
ECT2	2.06389	1.82236	2.59413	2.24414	3.09804	3.0488	2.86659	3.00891	2.59845	3.39975	2.5523	3.62985	3.39283	2.19169	1.79951	2.68505	2.60481	2.76228
GSKIP	5.07476	5.95431	5.35264	6.26304	5.67854	5.89333	6.06843	6.02064	5.73966	5.75344	6.27164	5.63271	6.3969	5.81452	5.22177	5.66411	6.08231	6.43636
LOC100229665	1.21443	0.35841	3.14678	0.0222987	2.49112	1.99974	2.6971	1.39582	2.66585	0.952203	1.69556	2.20714	2.43163	2.49494	1.53217	2.31649	2.18689	1.94918
BDH2	3.66061	3.33047	4.74171	3.76687	4.19007	4.62809	4.479	4.37443	4.31536	4.38599	4.23878	3.30113	4.48375	4.78006	3.3285	3.90537	4.37887	5.28008
BRD9	4.74188	4.9896	4.65932	5.00663	4.61746	5.01015	5.06218	5.05186	4.82933	4.89744	5.02256	4.9571	5.01598	4.87791	4.60086	5.09905	5.00401	5.24725
COG3	4.49054	4.73265	4.90366	4.93445	4.60355	4.9188	4.74886	5.09558	4.7046	4.76884	4.90835	4.80481	4.74377	4.72512	4.75308	4.72663	4.80886	5.23498
EIF2B4	5.7122	6.12854	5.93879	6.06325	6.09764	5.96868	6.06706	5.80909	6.38296	6.16532	5.62043	5.96607	6.15022	6.35426	6.13278	5.9913	6.18582	6.45497
RNF111	4.45577	4.18535	4.55465	4.42323	4.23273	4.37915	4.56192	4.51376	4.42721	4.45374	4.38642	4.46651	4.5269	4.37436	4.37415	4.39402	4.39459	4.8934
ACBD3	6.93689	6.7468	6.49898	6.82157	6.49257	6.9368	6.90843	6.70751	6.83259	7.12896	6.71635	6.95824	7.02465	6.92587	6.69201	6.86016	6.86853	7.19178
DPH3	6.13047	6.3149	5.95167	6.41512	6.22545	6.08005	6.15492	6.53913	6.25114	6.32449	6.30725	6.22097	6.13228	6.21244	6.3347	6.40351	6.29941	6.59193
EDRF1	4.5097	4.24103	4.47283	4.40615	4.40085	4.46845	4.61388	4.88554	4.59587	4.82892	4.65835	4.91886	4.67081	4.32925	4.19049	4.56486	4.35759	5.07833
EPDR1	6.32053	5.05125	5.91537	5.4531	5.49829	6.01776	5.82921	6.16082	5.96832	6.09988	6.03822	6.39746	5.87309	5.96058	5.39898	6.11235	6.15159	6.24029
MXD4	6.77027	7.11227	7.33643	7.30672	6.99593	7.28899	7.26003	7.53817	7.13294	7.22586	7.21158	7.299	7.09134	6.82368	7.28667	7.16474	7.2746	7.57936
SH3GL3	6.25209	6.4612	6.62428	6.39909	6.09373	6.4078	6.58358	6.91694	6.53828	6.61641	6.65823	6.41621	6.57283	6.42227	6.58313	6.27514	6.6016	6.93747
SPAG6	3.58246	3.85614	3.83575	4.21675	3.87799	4.37988	3.70749	4.50657	4.01772	3.81749	3.97243	3.76597	4.28791	4.42496	4.0094	3.73907	4.31333	4.154
ZCCHC4	5.37938	5.2293	5.2355	5.41809	5.21281	5.83878	5.44339	5.94683	5.47583	5.52294	5.51728	5.54426	5.47683	4.89945	5.63125	5.88656	5.60051	5.58178
CPE	8.53745	8.69627	8.46822	8.8747	8.2455	8.62364	8.80621	8.94434	8.5044	9.00217	9.00455	8.8285	8.62196	8.55907	8.3938	9.18393	8.919	9.06324
FAM185A	2.97904	1.92218	2.74244	2.31811	2.59415	3.15278	2.67716	2.92206	2.53329	2.95056	3.09382	2.459	2.51198	2.4067	2.88697	2.90923	2.70124	3.15207
FAM8A1	5.96038	6.07027	6.56931	5.85308	6.13357	6.30178	6.06963	6.67279	6.09135	6.1544	6.46272	6.27738	6.08008	6.08753	6.47278	6.14712	6.33903	6.63011
LIMCH1	4.40721	4.06732	4.39625	4.21581	4.0226	4.27978	4.46005	4.57675	4.40933	4.33408	4.35187	4.36562	4.43549	4.44553	3.98631	4.43773	4.39066	4.77725
NFXL1	4.31787	4.45334	4.776	4.78446	4.68997	4.87953	4.74332	5.27652	4.64016	4.83722	4.96105	4.75266	4.6615	4.39958	4.34249	4.59923	4.86574	5.23929
SOS1	5.01639	5.18596	5.23945	5.54109	5.26006	5.41094	5.33689	5.34021	5.18707	5.25225	5.33004	5.41943	5.13574	4.9925	5.23991	5.37005	5.41256	5.61955
SPRTN	4.28423	3.85029	3.81865	4.01328	3.98205	4.29826	4.13148	3.85	4.10132	3.97195	4.07997	4.07909	4.05601	4.0456	4.12802	4.17782	4.07085	4.47965
CDCA4	3.5056	3.98403	4.15282	4.22314	3.65431	3.95529	4.11548	4.34848	3.95508	4.30816	4.24785	3.82135	4.33429	4.31287	3.55391	4.13621	4.13452	4.41597
LOC100230955	5.15935	5.27831	5.48768	5.50788	5.31335	5.55698	5.70725	5.44792	5.22501	5.43914	5.63734	5.49486	5.34599	5.61846	5.01223	5.46178	5.53189	5.78825
PRKAA1	6.24129	6.04573	6.16548	6.13102	6.06251	6.12256	6.04694	6.23046	6.08632	6.28244	6.23523	6.3634	6.27266	6.12432	6.24893	6.31468	6.20265	NA
STK26	5.93119	6.17254	5.78256	6.32476	5.67301	6.46724	6.51456	6.44917	6.00037	6.45072	6.27995	6.32375	6.47835	6.19899	5.55572	6.60147	6.25045	6.61647
CAPZA2	7.1219	7.43183	6.95967	7.65689	7.01198	7.45166	7.50752	7.65453	7.2421	7.40343	7.72988	7.57266	7.45205	7.28925	7.07497	7.80079	7.4255	7.61009
LOC100190168	1.36687	4.03905	3.80173	3.44576	2.01944	3.56517	3.31707	5.1197	4.40031	3.71027	4.5745	3.58906	5.0656	4.45732	1.92672	3.91408	4.3627	4.06932
LOC100230284	5.18082	5.3801	5.21917	5.43966	4.94381	5.39667	5.46361	5.48931	5.17269	5.26688	5.46062	5.5849	5.28229	5.10101	5.26781	5.67025	5.49944	5.6545
LOC100231163	4.018	3.77749	4.69625	3.90313	4.60314	4.3378	4.33404	4.70701	5.02861	3.69837	4.64057	4.32249	4.44613	5.12241	4.24002	4.09321	4.47088	4.62667
LOC100231893	9.22408	9.29222	9.33882	9.12371	9.40944	9.36789	9.2723	9.46456	9.47788	9.24946	9.31172	9.53917	9.39537	9.54898	9.35681	9.17648	9.15096	9.74747
LOC105760520	1.86474	1.16172	2.11085	1.62821	3.5225	3.28633	2.32812	4.07153	3.03322	3.73706	2.143	1.98576	3.42532	2.88556	2.05898	2.14246	3.03492	2.2078
TMEM62	3.62347	3.48507	3.82488	3.60825	4.14577	4.06678	3.95476	3.98588	4.1118	3.5276	3.84127	3.65501	4.00868	3.79796	3.35677	3.87058	4.03335	4.16954
CLCN4	5.78002	5.86581	6.16968	6.07771	6.03823	6.3369	6.29329	6.55916	6.05232	5.737	6.20667	6.03416	6.13045	NA	5.83109	6.00734	6.03159	6.64394
E2F3	2.05391	2.70366	2.67095	2.99015	2.77251	2.7216	2.90286	2.92327	2.39559	2.65938	3.01162	2.98843	2.70401	2.86357	2.13988	3.39902	2.47216	3.29547
FAM103A1	5.96257	6.61189	6.3485	7.1038	6.15659	6.50996	6.60488	7.15659	6.19321	6.45244	7.03608	6.69697	6.56452	6.56103	6.47737	6.70834	6.55308	7.1051
FEZ2	6.68999	7.13386	7.37007	7.38125	7.00884	7.31969	7.52216	7.68953	6.94141	7.27177	7.56077	7.60606	7.08773	7.02423	6.97581	7.53278	7.34532	7.47765
LOC100219714	0.837199	0.554266	3.51538	2.44412	0.00956503	3.2342	2.89234	3.43384	1.86618	3.08332	3.18394	2.25993	2.69527	3.39435	0.0154909	2.95295	2.83969	2.91315
METTL8	3.2808	3.33457	3.68794	3.47129	3.51889	3.78173	3.53267	4.08247	3.41602	3.08199	3.9367	3.80301	3.80324	3.12487	3.26527	3.93993	3.53502	4.25781
PIGA	3.46428	3.34726	3.75741	3.57498	3.18452	3.82528	3.86858	3.86329	3.41851	3.68057	3.43846	3.4537	3.53265	3.80102	3.2891	3.81622	3.77078	4.09283
UMAD1	NA	4.74773	4.7568	4.93742	4.54838	5.03402	5.05186	5.07275	4.67801	4.75163	5.26705	4.77786	4.79496	4.97461	4.62873	4.85907	4.94828	5.43126
C2H18orf8	5.25418	5.1458	5.64815	5.38149	5.26817	5.4787	5.25778	5.6669	5.34672	5.20301	5.6521	5.28668	5.36926	5.26907	5.46354	5.3906	5.44155	5.83545
LOC105760074	3.91931	3.91636	3.45489	4.02893	4.0504	3.73313	4.63308	4.61607	4.18541	4.0182	4.49652	4.62548	4.44492	4.74378	3.86772	4.14134	4.26909	3.81699
LOC105760103	4.89317	5.53247	4.96523	5.47167	5.2187	5.73916	5.53257	5.48332	5.70401	5.91022	5.83878	5.43517	6.01577	5.91219	5.10776	5.25358	5.80942	5.22129
LOC105760963	3.15751	3.48794	3.08684	1.70351	2.6681	5.45	3.26833	4.70227	4.65917	NA	5.14352	3.50933	4.36016	3.20752	3.12013	2.52055	4.67933	4.9047
MRPL13	6.38706	6.32793	6.43022	6.53184	6.52989	6.41747	6.48301	6.93097	6.29301	6.68961	6.68798	6.77831	6.36679	6.18354	6.65898	6.93118	6.37456	6.80686
NUP43	2.95978	3.40935	3.49498	3.28101	3.26239	3.39991	3.08782	3.5585	3.59372	3.45536	3.14191	3.14785	3.5191	3.27367	3.81504	3.16282	3.44625	3.90782
PTDSS2	6.31522	6.16344	NA	6.10884	6.15926	6.54124	6.30571	6.01251	6.46707	6.34681	6.51619	6.06742	6.44605	6.59155	6.5234	6.13311	6.15982	6.84778
E2F6	6.19046	6.37399	6.57105	6.64265	6.46709	6.38469	6.57066	6.54927	6.17461	6.46104	6.63805	6.5273	6.55902	6.13001	6.44268	6.67898	6.59166	6.82538
KDSR	6.17643	6.68388	6.78796	6.75332	6.62923	6.42014	6.64747	7.15725	6.70971	6.5344	7.00823	6.63182	6.56151	6.5343	6.43433	6.97062	6.89789	7.02196
LOC100231451	4.81586	4.60659	4.93787	4.90923	4.64504	4.92923	5.04854	5.09335	4.91712	4.77442	5.05855	4.82922	4.92538	4.67364	4.65617	4.9618	4.86851	5.26469
PNKD	4.29937	4.48188	4.98649	4.25909	5.09928	4.72681	4.53939	4.80883	4.76782	4.73334	4.80448	4.47277	5.04636	5.00511	4.76242	4.16633	4.78121	5.28828
CNTN5	6.47903	5.0151	6.06547	4.96038	5.56957	6.60722	6.10007	6.21332	5.64553	5.97506	5.44351	6.69825	5.90241	5.87787	6.22993	6.19298	6.17046	6.54761
HMGN1	6.19361	6.23371	5.60006	6.45541	5.84797	6.29628	6.28372	6.65424	5.9802	6.45799	6.50048	6.23916	6.22406	6.22474	5.98261	6.46987	6.31849	6.72822
MBNL2	6.75039	6.83252	NA	7.1909	6.76843	7.19646	7.05355	7.02696	6.82638	7.00735	7.09345	7.02314	6.90652	6.67464	NA	7.25689	7.06891	7.07029
POLA1	2.98545	3.42656	3.17496	3.50261	3.49543	3.80769	3.83175	4.22473	3.52137	3.33412	4.18071	3.75068	3.6525	2.85798	3.23139	3.54692	3.44907	4.04511
SAT1	7.09179	7.43257	7.18221	7.26254	7.12675	7.42384	7.51483	7.61496	7.39237	7.76929	7.07242	7.9233	7.52563	7.48857	7.18338	7.55304	7.21503	7.64291
ZBTB10	3.90233	3.88552	3.7948	4.0866	3.65816	4.01351	4.20496	3.82663	3.69516	3.86393	4.01902	3.93925	3.73076	3.94147	4.0279	4.17817	4.06722	4.3353
GTF2F2	4.48617	4.3025	4.59331	4.3479	4.31075	4.48114	4.41751	4.76317	4.38255	4.60287	4.84677	4.71051	4.27735	4.51751	4.66931	4.40945	4.42253	4.88968
HSPE1	8.31797	8.46078	8.32261	8.4909	8.36791	8.63969	8.53869	9.0205	8.43794	8.7599	8.51322	8.94488	8.42932	8.50277	8.36247	8.56821	8.40277	8.80386
JKAMP	5.00655	4.99069	5.22349	4.92296	5.3331	5.34778	5.09579	5.28661	5.22572	5.03491	4.89404	5.18047	5.40531	5.43067	5.23721	4.97063	5.04662	5.51156
LOC100231853	1.52923	3.38747	1.97517	3.49717	3.20517	3.64003	3.49062	2.91517	3.59192	3.20945	2.92636	4.12673	3.60063	4.18581	2.08017	2.70514	3.41065	3.1871
LOC105759246	2.02687	2.32274	3.30252	2.42947	3.18072	3.53866	3.58561	4.0897	3.44616	2.78116	2.8243	2.33753	3.67491	2.59582	2.53104	2.76196	3.08229	3.48414
LOC100224854	4.04537	3.60611	4.07666	3.69123	4.17886	3.85191	3.85213	3.75676	4.07743	3.82195	3.74853	4.28881	3.96194	3.94621	4.29373	3.90791	4.17117	4.22562
LOC105760936	2.46138	2.97558	2.60832	2.99183	2.87556	2.76519	2.41583	3.66257	2.98771	2.8622	3.09609	3.62234	3.17482	2.94457	2.4514	2.75492	3.42155	3.36232
SP4	4.09813	4.13249	4.05122	4.40942	3.97511	4.30377	4.40948	4.35164	4.07135	4.22583	4.40336	4.05846	4.19185	4.36096	3.81287	4.46022	4.45286	4.60638
TMEM258	5.07062	5.97927	5.34044	5.74362	5.44012	5.80273	5.53172	6.20652	5.73856	6.06476	5.70075	5.94229	5.93787	6.13666	5.28645	5.6085	5.46005	6.36182
ZMAT3	6.17731	5.83241	6.05481	6.08492	6.11185	6.33327	6.30025	6.25737	6.34328	6.10569	6.2378	6.12719	6.4045	5.9117	5.9832	6.2361	6.13617	6.26271
BAG1	4.00971	4.06925	3.91802	4.21255	3.93277	4.15692	4.04058	4.05932	4.03288	4.08684	4.36727	4.48399	4.35056	4.1229	3.98342	4.20247	4.04945	4.20056
LOC100217828	2.05699	1.70166	1.57565	1.9578	1.54614	2.48951	2.46058	2.03495	1.67872	1.30987	1.62336	2.00013	2.31738	1.82793	2.45868	2.41566	2.01292	2.49328
SLC39A12	4.42808	4.46713	4.62152	4.44128	4.3343	4.74996	4.44771	4.98858	4.79811	4.51122	4.52778	4.63725	4.93031	4.65683	4.27169	4.74433	4.48701	4.92684
TFDP1	4.91571	4.98997	4.87242	5.13914	5.04382	5.31045	5.13758	5.38275	4.92843	5.39108	5.31258	5.06692	5.16483	4.76983	4.99511	4.99847	5.04296	5.58468
B3GNT2	8.25467	7.8537	7.98907	8.24786	7.79542	8.45213	8.33817	8.57479	7.89339	8.24396	8.49413	7.83279	8.32614	8.43061	7.88128	8.295	8.22591	8.74617
LOC100228466	5.63992	5.94546	5.82931	6.00013	NA	5.97718	5.79712	6.20019	5.84946	6.07174	5.88016	6.04522	6.10079	5.78159	5.64988	5.81181	6.00175	6.52844
SCYL3	4.88957	4.85797	5.0955	4.87457	4.87329	4.95238	4.91787	4.98172	5.01243	4.91892	4.71091	5.02132	5.17461	5.05074	5.17848	4.7446	5.03709	5.36402
SLC35F5	5.38214	5.32522	5.10873	5.45639	5.43967	5.66516	5.50916	5.78239	5.22236	5.19285	5.33591	5.51481	5.42326	5.34875	NA	5.65704	5.44699	5.62296
TRMT61A	4.15927	4.22033	4.26714	3.95733	4.34058	4.51874	4.10783	4.43678	4.2577	4.41327	4.10226	4.20658	4.25911	4.24289	4.42189	4.09473	4.2778	4.81097
ABCD2	5.84641	5.49286	5.7943	5.43691	5.71141	5.89681	5.80625	5.95478	5.61111	5.67472	5.58147	5.59408	5.64796	5.51414	5.94915	5.89835	5.91452	6.21555
B4GALT6	7.68492	7.74095	8.16555	8.00813	7.28347	7.91813	8.07618	8.11915	7.76198	7.90836	8.13351	7.81834	8.06861	7.6172	7.7784	8.21975	7.96525	8.55761
C1H2orf49	4.16283	4.59743	4.22629	4.70904	4.07162	4.52899	4.65477	4.66773	4.40395	4.87012	4.86229	4.70643	4.48902	4.57992	4.1141	4.70402	4.38739	4.97763
C3H6orf203	5.95528	5.97271	6.29502	6.26773	5.70476	6.2896	6.45031	6.77753	5.9672	5.86744	6.40419	6.78109	6.16619	5.88995	6.23107	6.5125	6.21155	6.57222
ADGRA3	4.55289	4.2493	4.37021	4.20304	4.10657	4.51265	4.43078	4.56765	4.36063	4.14797	4.26695	4.4503	4.28207	4.29243	4.60765	4.58664	4.87478	4.70525
AGPAT5	6.88056	6.9968	6.96034	6.96835	6.68247	7.155	7.06768	7.14433	7.13606	7.01801	7.17417	7.09495	7.02293	6.76523	6.88878	7.13187	6.98384	7.30731
ASB3	5.2832	5.07804	5.59419	5.11793	5.03801	5.52621	5.23378	5.72107	5.61693	5.06108	5.16028	5.11744	5.5647	5.52836	5.40384	5.3642	5.2807	6.02216
BCDIN3D	4.37842	4.47397	4.21443	4.24014	4.58654	4.58542	4.57901	4.31584	4.87487	4.58843	4.34961	4.23053	4.79165	5.10849	4.90413	4.3629	4.67085	4.50612
PPIP5K1	5.39067	5.40317	5.69362	5.45443	5.81922	5.56066	5.63435	5.62454	5.62434	5.54344	5.50602	5.26511	5.5587	5.60457	5.63379	5.3801	5.80823	5.9895
VCPIP1	5.28094	5.15688	4.79159	5.3509	4.92422	5.30828	5.52411	5.04357	5.19847	5.41754	5.11818	5.4097	5.21374	5.30599	5.2544	5.65493	5.27703	5.32873
LGR4	4.45742	4.55721	5.13031	4.8037	4.73293	4.6882	4.73823	4.84553	4.62822	4.57814	5.05889	4.49541	5.03834	4.30933	4.80884	5.01358	5.09898	5.26726
LOC100219557	3.57742	2.86342	4.45341	3.00501	3.97308	4.52057	4.49033	3.9691	4.09842	4.00455	4.07258	2.85549	3.25558	3.96223	4.21949	4.3659	4.16848	4.13835
LOC100221681	4.56131	4.77476	4.7161	4.47095	4.68269	4.40642	4.58485	4.33893	4.76826	4.85837	4.77574	4.60587	4.78043	5.06756	4.76079	4.8244	4.73956	5.03221
LOC105760844	6.75634	7.32154	6.92603	7.32931	7.14086	7.20715	7.08809	7.18161	7.47163	7.35779	7.16164	7.17802	7.45611	7.27353	7.08084	7.18893	7.15245	NA
SAMM50	6.16156	6.09384	5.99452	6.09911	6.22677	6.23633	6.16616	6.01878	6.22747	6.4013	6.04209	6.05937	6.31325	6.29614	6.04783	6.1595	6.20744	6.40007
SLC30A5	6.39104	6.54378	6.46189	6.55868	6.63943	6.65889	6.57216	6.66265	6.5508	6.79574	6.59537	6.58932	6.64034	6.48604	6.52722	6.50889	6.5604	NA
SRSF5	8.93702	8.78541	9.56202	9.3639	8.98293	9.24871	9.02347	NA	9.01999	9.35015	9.32664	9.33842	9.16062	8.67239	8.97913	9.65166	9.48751	9.66363
TRUB2	4.54633	5.05548	5.05201	4.42244	5.49615	5.25608	5.06665	5.05465	5.35745	5.24467	5.26529	4.91117	5.39065	5.19787	5.05251	5.05138	4.99861	4.9975
UBL3	6.91308	7.2943	7.05818	7.64822	6.9426	7.36824	7.55186	7.85451	7.1202	7.41645	7.61795	7.4212	7.5513	7.02336	6.66812	7.72848	7.5311	7.91203
APBB2	4.79863	5.20306	5.16307	5.24028	4.89406	4.95067	5.2241	5.23834	5.18322	4.97189	5.25046	5.07347	5.21205	4.95039	4.91939	5.28566	5.24576	5.59663
IMPA2	5.57093	5.16303	5.2021	5.48735	5.05628	5.28874	5.3358	5.3007	5.48756	5.44184	5.54942	5.46394	5.35661	5.3859	5.23679	5.55093	5.67223	5.59746
OPA1	5.97074	5.97604	6.34281	6.19491	6.05753	6.26582	6.23035	6.2148	6.01869	5.95775	6.3936	6.20274	6.10229	5.94835	6.00415	6.21583	6.30337	6.53791
TMEM19	4.69649	5.25317	5.05664	5.29854	5.19088	5.36418	5.00081	5.44396	4.87984	5.31039	5.48183	5.30807	4.97586	4.75286	5.26521	5.09078	5.43528	5.67411
ZGRF1	1.35782	0.830949	2.23721	1.57422	1.309	2.0781	2.03219	2.25492	1.78068	1.49893	1.12797	1.75167	1.56116	1.37647	1.47854	1.71497	1.87135	2.33877
ARSG	1.88699	2.34587	2.40759	2.39219	2.64389	2.86007	2.69299	2.90155	3.26652	2.60257	2.4747	1.81168	2.30697	2.73614	2.60975	2.4557	2.95455	2.54798
CLDN11	5.38591	5.27947	4.93447	5.25998	4.75381	5.16958	5.16894	4.96183	5.54874	5.53227	5.554	5.55123	5.0796	5.41777	5.53868	5.87923	5.35819	5.45935
DNAJB9	5.38992	5.24149	4.84972	5.28395	4.95902	5.43732	5.5665	5.40397	5.27589	5.49305	5.59259	5.36227	5.32992	5.54362	4.91503	5.65861	5.33971	5.55965
FAM114A2	4.3091	4.25383	4.73058	4.57755	4.43683	4.43397	4.36661	4.5852	4.27536	4.12099	4.58962	4.53763	4.39919	4.3086	4.77478	4.51763	4.56898	5.02767
SEC23A	6.13942	6.19471	6.09139	6.39387	6.21655	6.32608	6.38322	6.45825	6.12807	6.02443	6.40296	6.21445	6.29488	6.12908	6.04865	6.48843	6.31053	6.62734
SORBS3	4.02947	3.94368	3.65807	4.03768	4.11692	3.9382	4.10822	4.30466	4.39254	4.46234	4.00527	4.37344	4.15775	4.2753	4.09303	4.45318	4.50027	3.70785
SPRED2	5.84511	5.69499	5.52465	5.89232	5.68994	5.98167	6.23736	5.95864	6.04655	6.0847	6.19676	6.27312	5.59961	6.05414	5.32357	6.15919	6.06183	6.09896
BARD1	1.89306	1.00669	1.90836	1.49301	2.45306	1.88644	2.17751	1.77869	2.42678	2.12484	2.52635	1.30891	2.00839	1.80464	1.34003	1.34447	2.7459	2.71606
INPP5A	6.36405	6.54732	6.30966	6.64934	6.19187	6.52465	6.68057	6.54876	6.56932	6.59307	6.7912	6.57184	6.7193	6.22876	6.22201	6.58165	6.76869	6.90029
ISOC1	4.53299	4.29961	4.66102	4.51264	NA	4.53876	4.70054	5.10494	4.6511	4.48748	4.4124	4.76806	4.92911	4.46111	4.49837	4.91847	4.59899	4.72044
LOC105759183	4.67053	4.25125	4.34664	4.43066	4.14954	4.51167	4.62024	5.47568	4.28936	4.51414	4.41935	4.8447	4.72714	5.02345	4.08305	4.59383	4.79445	5.26679
NAA16	4.94737	5.2018	5.04532	5.35364	4.83892	5.23709	5.25303	NA	5.01655	5.1105	5.01543	5.413	5.25182	4.89529	5.05697	5.39536	5.32201	5.55
PI4K2B	3.89848	4.35959	3.97071	4.1567	4.0157	4.37245	4.22938	4.03875	3.92529	4.35267	4.37818	4.25034	4.06767	3.94105	4.00991	4.43387	4.39919	4.57166
CAT	6.89338	6.77346	7.1977	6.8892	6.78091	6.97859	6.91018	7.13371	6.98722	7.10251	7.09584	6.9914	6.89716	6.76102	7.08725	7.00328	6.99225	7.22849
LOC100221107	4.66398	5.07595	4.77991	5.28432	4.97045	5.12527	5.07198	5.24074	5.34837	5.62775	5.40863	5.14634	5.43629	5.37358	4.55436	4.77858	5.27205	5.39067
LOC105759132	4.23968	3.68735	4.6031	4.59754	4.75488	5.51941	5.22895	5.36204	5.25499	5.25585	3.52308	4.35833	5.17608	5.28835	3.80186	4.50819	5.07301	5.29571
ADGRL2	6.68043	6.51784	7.16088	6.68744	6.65854	7.06227	7.07379	7.24894	6.58023	6.63812	6.8006	7.03876	6.80153	6.6908	6.7681	6.90981	7.01589	7.20732
CDKL1	4.16655	3.97266	4.34475	4.00353	4.29932	4.39121	4.06261	4.48218	4.923	4.56419	4.07795	4.08805	4.32036	4.60738	4.3783	3.77964	4.35591	4.98768
LOC100219223	4.8722	4.94026	4.6691	5.14723	4.78931	5.25492	5.34926	5.61461	4.94051	5.4878	5.07018	5.6733	5.22986	5.12067	4.93921	4.94397	4.81266	5.39739
LOC100230738	4.98967	5.45333	5.63364	5.086	5.27169	6.15933	5.85454	5.95952	6.25656	5.92225	5.45953	5.12304	6.10002	6.33942	5.17806	5.22358	6.10882	5.69215
LOC101233097	1.49047	2.27255	2.47795	1.30794	1.37728	3.77403	2.17396	3.66423	2.7148	1.19158	3.88419	2.52758	2.79965	2.72425	1.29715	1.72112	3.47259	3.60195
SYNJ1	7.40498	7.1236	7.52012	7.44773	7.22681	7.50184	7.63681	7.44632	7.35455	7.22999	7.42305	7.58156	7.53073	7.09666	7.47027	7.4545	7.49842	7.69471
THUMPD2	3.45963	3.0756	3.38079	2.94014	3.2963	3.74457	3.28972	3.67132	3.38656	3.50172	3.63471	3.43276	3.26885	3.22907	3.18438	3.47878	3.19592	4.03093
TSPO	6.91028	5.63625	6.18449	6.09867	6.48131	6.42813	5.93249	6.60101	5.73373	7.03907	7.0262	6.58995	6.69162	6.17359	6.41579	6.87885	6.39388	7.06659
URI1	5.76844	5.89495	5.8613	5.93221	5.77181	5.77326	5.93615	6.15495	6.00255	5.97835	6.22425	6.00101	5.91548	5.81589	5.87891	5.97567	5.77755	6.14294
ATP6V1E1	7.99844	8.22651	8.03959	8.1274	8.08298	8.36938	8.05447	8.19593	8.08747	8.34749	8.28296	8.27553	8.23906	8.19163	7.96217	8.07266	8.14519	8.53723
LOC100230262	1.85593	2.06782	2.39408	2.18608	2.71641	2.76694	2.40224	2.64293	2.35091	2.7394	2.24753	2.23651	2.86186	2.63675	2.85251	1.84984	1.85264	2.84567
LOC105759439	1.31614	1.26513	2.87732	2.53937	1.48607	1.84599	2.74038	2.07816	2.28411	2.89927	2.73391	2.15195	1.87981	1.12133	2.39802	1.57062	2.75315	3.09666
PIGQ	4.26005	4.63874	4.71062	4.65212	5.53616	4.91516	5.1026	4.80833	5.27114	5.02591	4.73769	4.40318	5.10964	4.78294	5.1209	4.92476	4.74358	4.85419
FNDC9	5.18781	6.77852	7.15725	7.10115	7.05035	7.27349	6.34273	5.51229	6.86106	7.47123	6.33911	7.17018	6.59055	7.81226	8.06853	7.48587	7.40534	6.43297
PGAP2	4.65124	5.25411	4.54226	4.95415	5.03358	5.31975	5.38986	4.50026	4.94474	5.58726	5.49421	5.22862	5.33884	5.89231	5.12661	4.96964	5.29496	4.96404
PTBP2	5.19459	5.54291	5.70098	5.81967	5.59269	5.66744	5.51978	5.83805	5.37016	5.55401	5.73874	5.59723	5.58721	5.39987	5.3963	5.74075	5.74551	5.98792
TRIB2	5.82848	5.84863	5.4121	5.93335	5.69524	5.75956	6.00658	5.85807	5.96149	5.81374	6.09256	6.10729	5.9293	5.78308	5.51403	6.13576	6.07776	5.96196
LOC100217866	4.84511	5.4291	5.107	5.24529	5.35939	5.28005	5.13309	5.10577	5.4307	5.65938	4.93413	5.33746	5.47758	5.53724	5.12576	5.24011	5.18638	5.74968
LOC100222284	5.18746	5.52343	5.4107	5.58129	5.31066	5.61196	5.70241	5.82342	5.71043	5.91054	5.52152	5.58031	5.63264	5.52737	5.1744	5.43732	5.32365	6.17164
LOC105759038	1.963	2.90318	2.77916	3.28181	3.47559	3.02716	2.73511	3.57377	3.39539	3.83458	2.27804	3.39014	3.43836	2.68998	3.15591	2.90364	2.79675	3.47024
SDC2	7.1462	7.5257	7.23334	7.86749	7.09476	7.43451	7.78645	7.34191	7.45934	7.63717	7.97019	7.54118	7.56063	7.58284	6.84732	7.96026	7.72909	7.96126
TMX4	5.73742	5.61115	6.26775	5.88902	5.39369	5.71732	5.85811	6.03612	5.81935	6.00422	5.96144	5.83705	6.29145	5.49884	5.89331	5.97776	5.99485	6.51714
LDAH	5.16215	5.16414	4.83713	5.39339	5.02524	5.27215	5.26268	5.03458	5.09594	5.18451	5.21032	5.36478	5.34448	5.22743	4.98656	5.38869	5.33171	5.32435
PNPT1	5.52131	5.40501	5.12914	5.5205	5.35001	5.73804	5.53902	5.59371	5.59249	5.43001	5.53708	5.61478	5.52946	5.45926	5.21544	5.54606	5.53886	5.73978
RPL7	7.64529	7.94517	7.65692	7.42294	7.737	7.62709	7.66267	7.67891	7.95565	7.78143	7.98944	7.64151	7.81247	8.07158	8.07781	7.62389	7.6955	8.2256
THBS2	2.68957	2.80601	3.72216	3.07364	3.07358	3.2524	3.30612	3.4035	3.48962	3.10493	3.1538	2.86806	3.34227	3.11985	2.972	2.82627	3.45054	3.80175
BMPER	4.23	4.01091	3.90859	3.88599	3.8204	4.27498	4.0093	4.11794	4.16273	4.08645	4.06937	3.93615	4.07129	4.40493	3.89044	4.35211	4.20472	4.41203
FHL5	1.01209	1.54848	2.01893	2.13149	1.84898	2.13708	1.59934	2.23641	1.77137	1.01312	1.70098	2.34233	1.53462	2.01118	1.76007	1.93967	1.73791	2.28157
GXYLT1	3.53105	3.20851	3.12142	3.23474	3.05987	3.47206	3.44985	3.88021	3.12832	3.44394	3.43558	3.76448	3.27675	3.03378	3.41804	3.36301	3.44063	4.21074
LOC100221679	7.53255	7.64155	7.32504	7.39353	7.38037	7.4575	7.41032	8.00093	7.67838	7.54685	7.49108	7.94396	7.68616	7.7827	7.60399	7.64713	7.37038	7.94912
LOC105759055	3.48359	2.73727	3.55439	2.7708	3.82529	3.47958	3.62574	3.41451	3.23814	3.0265	2.87196	3.6365	3.61522	3.73676	3.29703	3.37557	3.3585	3.9877
MLH1	6.19184	5.5471	5.99743	5.73263	5.80201	6.08115	5.97353	5.92078	5.75871	5.92189	5.83521	6.13506	5.82609	5.91927	5.99737	5.95425	5.96616	6.51522
ADAL	2.78019	2.89736	4.04022	3.53758	3.39608	3.543	3.55942	4.04817	3.67459	3.08389	3.48077	3.0278	4.09953	3.20628	3.44381	2.94989	3.58233	4.28172
DYSF	3.75837	3.87781	4.52196	3.65104	4.6784	4.21742	4.03147	4.54415	4.41392	4.17485	3.93557	3.92829	4.10924	4.43374	4.23561	4.50292	3.88717	4.62043
LOC100231678	4.93574	3.49559	3.94886	3.03134	4.21488	4.4222	4.61993	4.86324	4.07947	4.03119	4.30497	4.86179	3.91635	3.87905	4.684	4.83207	4.05467	5.13734
TCP1	8.10785	7.97232	7.63697	7.85666	7.90961	8.08612	7.99629	7.76284	8.24505	8.14415	8.02088	8.11511	8.25508	8.02706	8.01193	7.84572	7.95145	8.39553
TXN2	8.02421	7.73396	8.34632	7.60743	8.21435	7.87509	7.79286	8.0334	7.88184	7.98372	8.17229	8.04632	7.85302	7.97822	8.58308	8.04108	8.1202	8.50661
ALG14	4.17463	4.41099	4.50119	4.2104	4.20651	4.5052	4.55244	4.16077	4.29402	4.64739	4.4086	4.98919	4.59632	4.67464	4.34204	4.32571	4.03195	5.1551
GLO1	8.13482	8.00217	8.2701	7.97501	8.22833	8.11792	8.09542	8.1645	8.08207	8.1188	8.58926	8.36806	7.94514	8.03194	8.30866	8.27012	8.0899	8.53199
HPS1	4.57702	5.22626	4.8808	4.88956	5.37553	4.78069	4.63348	5.14903	5.18253	5.10691	4.95952	5.04662	5.14164	5.04255	5.16585	4.95086	5.20735	5.29034
KIAA1210	2.3225	2.30001	2.03679	1.94888	1.80052	2.71979	2.72819	1.92007	2.46251	2.0204	2.16615	2.21483	2.16617	2.28282	2.45706	2.54603	2.33238	2.97494
KLHL23	3.04721	2.88531	3.86904	3.2562	3.18889	2.90553	3.46921	3.76875	3.24104	3.19699	3.58742	3.391	3.30269	3.06552	3.65456	3.34079	3.13274	4.02813
LOC100226611	6.65721	6.89573	7.23601	7.08661	7.07559	6.82757	6.80037	7.48585	6.94759	7.35215	6.73704	7.28453	6.95104	7.0514	7.1716	6.72877	7.20529	7.68959
LOC101233680	4.94188	4.11823	5.23499	4.51473	4.97963	4.5858	4.56838	4.80506	4.71206	4.66996	4.94132	4.87714	4.51545	4.49432	5.38468	4.92279	5.05882	5.39279
LOC105760441	0.137304	0.788317	1.62459	0.0222987	0.00956503	3.88831	4.27846	3.45976	4.35482	0.137343	3.45059	0.0204683	3.82407	1.66732	2.53583	2.30708	0.662261	2.0843
RANBP3	5.26034	5.2014	5.2501	5.33119	5.23756	5.41666	5.28718	5.4714	5.18435	5.3079	5.22867	5.35653	5.38454	5.14508	5.4258	5.45105	5.31013	NA
STK36	3.05935	3.42765	3.11013	3.35885	3.58535	3.74959	3.19258	3.2132	3.21235	3.62053	3.68831	3.07278	3.69812	3.53199	3.37393	3.30308	3.32926	3.69437
CAMK2N1	10.5496	10.5918	11.427	10.4167	11.1376	11.5039	10.8573	11.641	11.2869	10.9484	10.9169	11.0169	11.5026	10.9115	10.763	10.7019	11.5689	11.1279
CD151	6.30539	6.41333	6.40785	6.11458	6.31547	6.39271	6.34565	6.60754	6.63344	6.11333	6.40356	6.30678	6.68257	6.656	6.23405	6.37022	6.39352	6.8662
LOC100225476	1.84195	2.51117	2.08401	2.73717	1.44167	2.59064	2.98981	2.67927	1.70523	2.64415	3.34454	2.82487	3.17699	3.14859	1.28382	2.37298	3.09672	3.18003
NAPEPLD	5.25109	5.25642	5.06144	5.71061	5.0446	5.37844	5.17812	5.59682	4.96225	5.05259	5.413	5.31024	5.39986	5.22018	5.22228	5.72035	5.56972	5.91023
BBS4	5.69048	5.98922	6.31516	5.8981	6.0657	6.12463	6.14187	6.16898	5.96874	6.22886	6.12318	5.82144	6.00192	6.19991	6.14955	5.69103	6.18397	6.54929
C1AH12orf29	5.89675	6.1934	5.84799	6.24065	5.94676	6.14923	6.1594	6.4264	5.98861	6.56152	6.3785	6.41927	6.22354	6.09845	5.8496	6.13486	6.13403	6.42674
KBTBD3	4.87896	5.09966	5.32348	5.32627	4.93156	5.16498	5.24828	5.6628	4.9453	5.41615	5.4351	5.32292	5.23488	4.94833	5.0894	5.38827	5.20305	5.51694
LOC100229577	2.33808	2.13685	2.37203	1.91517	2.05551	2.19849	2.24177	2.44248	2.36182	2.18545	2.39587	2.20855	2.08672	1.98297	2.14279	2.77003	2.58303	2.75013
LOC100231022	NA	3.83749	3.64089	3.61841	3.31173	4.05545	4.01922	4.07083	3.74769	3.97729	3.93408	4.10768	3.73935	3.83824	3.46112	3.88822	3.6411	4.61558
MTMR1	5.69428	5.39223	5.8107	5.62175	5.67908	5.56406	5.57239	5.75241	5.51805	5.54609	5.56133	5.60595	5.55205	5.5815	5.90716	5.72587	5.79336	5.98317
PDHB	6.94383	6.92831	6.87556	6.8394	6.88279	6.93872	6.89282	7.06209	7.0829	7.06567	6.75629	7.07715	6.98806	7.18011	6.78757	6.98229	6.88878	7.35459
RPL15	8.2077	8.75347	8.36251	8.47499	8.42429	8.47435	8.45793	8.47148	8.72937	8.52774	8.40003	8.4894	8.74449	8.70285	8.43138	8.32847	8.65505	8.91456
TJAP1	4.12363	4.356	4.42145	4.33649	4.63941	4.29562	4.35433	4.40114	4.4642	4.55802	4.11636	4.49755	4.49811	4.45697	4.45248	4.19429	4.36569	4.77567
LOC105758687	3.50042	3.9591	4.08355	3.96422	4.03454	4.00342	3.97883	4.72567	3.82209	4.41982	4.00393	4.2017	3.97456	3.88234	3.43166	3.95971	4.29741	4.7451
LOC105759278	1.71059	2.28173	2.01256	2.1081	2.20873	2.23575	1.91258	2.04668	2.38671	1.86732	2.30495	2.14693	1.68474	2.54393	2.0418	2.17608	2.39305	2.51377
LOC105759376	3.89267	4.01461	5.44161	4.14531	4.38081	4.67114	4.4853	5.02748	4.25107	4.77098	4.6755	4.67361	4.83708	4.05577	4.33908	4.41413	4.42046	5.46349
MCEE	2.80244	3.07511	4.93099	2.57959	2.61152	4.44328	4.53856	4.9139	4.82855	3.62234	4.5182	2.36782	5.07716	4.50078	2.5608	3.83174	4.44464	4.83041
PPA1	6.5935	7.25865	7.20088	7.05634	7.01122	6.8424	6.94584	7.16705	6.96301	7.25829	6.94151	6.94696	6.88739	7.19818	7.29697	7.20206	7.12427	7.48919
SERPINE2	4.41731	4.78105	5.14359	5.56564	4.73712	4.69436	5.02314	5.34373	4.54072	5.48143	5.14533	5.12988	4.66713	4.97382	4.96995	5.10229	5.27132	5.44692
SNAPC3	4.29344	4.40701	4.30034	4.54491	4.53934	4.46689	4.37857	NA	4.46766	4.80418	4.56397	4.53484	4.65003	4.5771	4.51258	4.44829	4.51351	4.32435
WDR60	2.93293	3.03635	3.79825	3.25948	2.83652	3.39268	3.25407	3.78308	2.92286	3.1589	3.41708	3.3206	3.14994	2.80695	3.69282	3.23875	3.85176	3.94267
AQP11	3.47347	3.67512	4.28987	3.59309	4.0294	3.89325	3.70341	4.02895	3.83281	4.05243	3.42348	3.95114	3.86411	3.86205	3.96237	3.65947	4.01853	4.45603
CMC2	5.37386	5.3569	5.34085	5.44012	5.09412	5.41738	5.24477	5.2828	5.05139	5.42728	5.60631	5.46285	5.37341	5.1406	5.53539	5.77398	5.49537	5.79098
FBXO38	5.86203	5.68778	5.73002	5.87745	5.72079	5.88723	5.80523	6.16509	5.82824	5.85863	5.79648	5.82004	5.90686	5.74024	5.67436	5.87381	5.82513	6.2798
HPS3	4.46127	3.91501	4.14693	4.26967	4.1827	4.07463	4.33191	4.55889	4.30565	4.08169	4.12325	4.3073	4.18648	3.93923	4.27731	4.41011	4.53532	4.8056
LOC100219547	NA	1.66808	2.10252	2.30318	1.47127	2.40369	2.38937	2.38691	1.94731	2.43027	2.47194	2.00875	2.21913	1.93369	1.9448	2.12718	2.32556	2.24428
LOC100226843	5.36243	5.70523	5.58821	5.81312	5.85494	5.87333	5.76999	5.38761	6.04567	5.72099	5.56905	5.70313	5.84561	6.10212	5.7157	5.31826	5.71367	6.27673
2017-03-06	6.48279	6.6737	6.85951	6.81356	6.57687	6.81695	6.96387	6.8079	6.65884	6.65842	6.9165	6.50305	6.68865	6.72304	6.56236	6.81293	6.80934	7.15553
PPA2	6.19223	6.22783	6.16751	6.02356	5.81369	6.13562	6.14787	6.41044	6.20428	6.59706	6.35022	6.18212	6.37031	6.26544	6.01052	6.38093	6.17376	6.64454
EXTL2	6.44652	6.53768	6.56527	6.72273	6.51643	6.63	6.47281	7.04677	6.64402	6.71506	6.78129	6.77996	6.53029	6.31531	6.64172	6.79739	6.95808	6.67675
TBPL1	6.50761	6.43391	6.83695	6.60681	6.56173	6.6757	6.9421	6.90109	6.39376	6.67044	6.90721	6.67372	6.60128	6.61177	6.65615	7.08022	6.46474	6.87213
UPB1	1.89492	2.06655	3.14357	1.38619	1.95065	3.69568	2.41302	2.13601	4.07993	2.18997	2.31811	1.72244	4.76403	3.57519	1.98881	2.97666	2.34963	3.55545
COG2	5.01254	4.86655	4.9125	5.35952	5.15574	5.31931	5.18376	5.41643	5.14792	4.50958	5.0467	5.22632	5.15274	5.17581	4.80151	5.34546	5.33084	5.52267
EGLN1	6.04009	6.07467	5.88008	6.43226	5.74809	6.23726	6.4335	6.19172	6.06844	6.05557	6.3789	6.31485	6.18126	6.07333	5.80413	6.53225	6.26981	6.42356
LIN7A	6.06306	5.95346	5.96558	6.34705	6.18155	6.3473	6.35835	6.75694	5.95505	6.13496	6.18747	6.38174	6.09745	5.93045	6.01657	6.39594	6.25584	6.48898
LOC105759863	3.30021	4.44078	2.79336	4.503	3.48807	4.24783	4.51522	4.89947	3.52437	4.87411	4.66067	4.99474	4.02289	3.96264	3.19479	5.14434	4.39146	4.36081
TPD52L2	7.91218	7.78391	7.68403	7.8845	7.6626	7.94304	7.84929	7.77242	7.96464	7.97177	7.85676	7.95306	7.93205	7.90707	7.77283	7.95866	7.8882	NA
KCNK2	6.98813	7.18102	8.04773	7.60106	7.34478	7.63563	7.43251	7.88733	7.19737	7.4758	7.6366	7.46751	7.7203	7.08505	7.61807	7.55647	7.29715	8.31197
LOC100220017	8.70542	8.7229	8.7981	8.93402	8.56116	8.95606	8.84412	NA	8.68192	8.9876	8.91541	9.04973	8.75623	8.73817	8.52818	9.15284	8.83851	9.09937
MTCH2	7.20688	7.5549	7.23232	7.25549	7.6685	7.35502	7.44042	7.28502	7.70056	7.60327	7.23732	7.51805	7.57957	7.71639	7.43234	7.30275	7.38287	7.76008
NXPH1	6.03439	6.03393	6.50414	6.34994	6.25393	6.38226	6.31092	6.68994	6.12408	6.27321	6.5912	6.4774	6.21884	5.88319	6.25149	6.5248	6.24107	6.63896
CHADL	2.55799	0.40828	2.33074	0.51928	2.24847	2.73885	1.93498	2.35216	2.61679	1.20311	1.42466	2.2552	2.46779	2.47611	1.28813	2.15374	2.29622	2.85294
FNTM1	1.4075	1.11219	0.660406	1.54994	0.25256	1.31082	1.74502	1.27054	1.37789	0.591385	2.14201	1.42461	1.67965	1.35801	0.856064	1.71417	1.9083	1.71346
LOC100190503	7.97501	7.89568	7.8567	7.7056	7.72556	7.89756	7.82012	8.05438	7.96827	7.96836	7.85264	8.10589	7.93088	7.93534	7.86357	7.99434	7.91644	8.10907
LOC100217751	0.859519	2.12	2.24159	1.90307	2.9526	1.80837	1.38516	2.33836	2.90437	2.07791	2.39646	1.32041	1.8089	2.51288	2.75349	2.01561	1.87206	2.89603
LOC105760187	3.38357	3.7732	3.18198	4.08532	3.51061	3.80279	3.73074	3.8378	4.61583	4.13034	3.82067	3.78542	4.30782	4.1775	3.28524	4.07021	3.67506	3.8862
PEX16	4.67169	4.81297	4.45879	4.48967	5.06418	4.83137	4.55538	4.95111	4.99395	5.19802	4.67162	4.80269	4.84024	5.12402	4.66185	4.73973	4.62759	5.22997
ABHD17B	5.00044	5.15755	4.70029	5.50604	4.69064	5.4192	5.44745	5.38671	5.17476	5.50725	5.66124	5.48214	5.42367	5.21179	4.74489	5.69142	5.47822	5.11731
BCL7A	4.69011	5.41907	5.36013	5.60953	5.25471	5.35833	5.44851	5.70275	5.30564	5.44773	5.78196	5.57103	5.51193	5.33011	5.08277	5.82215	5.63149	5.13829
CCNT2	4.72147	4.99033	4.92222	4.93273	4.73626	5.21477	5.02688	5.2202	4.9057	5.00487	4.9695	5.15231	5.05699	4.71517	4.77594	5.01925	4.92344	5.33095
DSC1	1.59191	1.16393	2.35438	2.13902	1.697	2.2053	2.02604	2.59705	2.20803	1.22761	2.39193	NA	2.0324	1.35662	3.15136	1.78387	2.15751	2.14208
EBAG9	7.65046	7.29584	7.16871	7.33093	7.01405	7.65888	7.59002	7.42134	7.47926	7.37387	7.62621	7.57016	7.43361	7.29404	7.5021	7.83993	7.46981	7.60645
EVL	7.02214	7.07714	7.16696	7.29565	7.2125	7.302	7.18882	7.46391	6.86973	7.19291	7.42517	7.46244	7.03719	6.96127	7.1906	7.24502	7.14753	7.66721
FARSB	6.10626	5.73429	5.93635	5.80301	6.29631	6.0335	5.89949	5.82012	6.1737	6.06444	5.81962	5.97718	5.99634	6.00514	6.2407	6.00989	5.99184	6.29916
GOT1	8.69026	8.67809	8.69946	8.44387	9.04159	8.72398	8.73001	8.60741	8.90265	8.79486	8.6301	8.73681	8.68057	8.76291	8.86014	8.6058	8.84746	9.0676
RELL1	4.17555	4.29054	4.18866	4.65901	4.08373	4.76998	4.49583	4.54201	4.5411	4.2679	4.49398	4.27774	4.55226	4.31562	3.94729	4.60364	4.46192	4.8218
RYK	4.90002	4.92672	4.74675	4.89645	4.97773	4.97466	4.90711	4.83641	4.93356	4.97566	4.96846	4.85336	5.10373	5.10607	4.9171	4.6882	4.99335	5.21776
SEC61B	6.51969	6.84843	6.61216	6.82312	6.95986	6.9041	6.80701	6.92883	6.89429	7.13914	6.63872	6.98469	6.87072	7.15481	6.62733	6.74493	6.65573	7.0831
UBE2J1	6.73571	6.35043	6.97549	6.44134	6.45116	6.85524	6.55101	6.86488	6.62214	6.39134	6.76588	6.62762	6.60197	6.59567	6.79237	6.71441	6.84809	7.12543
EAF2	4.28305	4.05095	3.57921	4.182	3.85474	4.29939	4.1391	3.89525	3.98556	4.14251	4.15232	4.60275	4.1605	4.26313	4.22037	4.17857	4.00815	4.47091
HTATSF1	5.68026	5.84356	5.63676	6.04914	5.70861	6.04004	5.99566	6.08688	5.71353	5.84435	5.97795	6.07243	5.92555	5.76431	5.40344	6.14321	5.97206	6.21634
PANK3	7.48924	7.61588	7.87752	7.67957	NA	7.95622	7.89762	8.15634	7.62404	7.94745	7.98502	8.12086	7.92382	7.69608	7.62343	8.00478	7.91788	7.58154
PIGH	4.99808	3.7386	4.52305	4.10686	4.14488	4.57795	4.30598	4.87894	4.1068	4.76109	4.15111	4.77237	4.74465	4.18277	5.04138	4.26948	4.64918	5.38815
RAB33A	6.09117	6.50244	6.17305	6.32226	6.71451	6.60574	6.58408	6.23822	6.43759	6.58171	6.7974	6.45701	6.38139	6.63034	6.52505	6.02519	6.29226	6.89161
TMEM82	2.29561	2.9901	3.20029	2.75161	3.2936	2.95378	2.85357	3.89875	2.93166	2.73809	3.07192	3.45239	3.47851	3.56616	2.15846	2.97253	3.22472	3.64082
CGGBP1	5.07384	5.30357	5.11122	5.41117	5.13252	5.43639	5.41679	5.29429	5.23345	5.52888	5.30113	5.21017	5.30139	5.26948	4.93789	5.46881	5.3846	5.5486
FAHD1	3.18836	3.14132	4.14775	3.5727	4.21362	4.04654	4.08495	4.17764	4.01917	4.19541	3.83133	3.58723	4.46338	4.18035	3.34933	3.67652	3.74123	3.6747
FBXO33	4.64836	4.84006	5.02746	5.06749	4.72381	4.87022	4.90414	5.04232	4.72464	4.7595	5.01474	4.79854	5.09075	4.62461	5.07094	4.98766	4.85019	5.35188
LSM14A	5.65932	5.62651	5.7641	5.81667	5.44227	5.76023	5.83465	5.91125	5.41894	5.84045	5.76148	6.01013	5.73943	5.61494	5.5431	5.93529	5.87546	6.04961
SMYD2	3.70789	3.70349	3.89401	3.50087	3.60373	3.60187	3.59353	3.65624	4.02843	NA	3.49351	3.67781	3.54639	3.80581	4.05174	4.00419	3.79149	4.24489
ALG12	6.22541	6.22597	NA	6.03608	6.11364	6.37083	6.31539	6.48518	6.2465	6.23346	6.38274	6.44486	6.26487	6.42587	6.0331	6.27091	6.2585	6.44745
CHMP5	7.34414	6.9312	7.23135	7.32412	6.96107	7.30826	7.35425	7.42921	7.07625	7.18505	7.59833	7.41731	7.2818	7.04098	7.37236	7.24659	7.17224	7.55154
FNBP1	6.90852	6.65196	6.70065	6.92685	6.66891	6.65664	6.73195	6.82594	6.71504	6.70491	6.94968	6.99543	6.83393	NA	7.04658	7.05454	6.79669	NA
GOPC	5.85668	5.97186	5.65376	6.02392	5.70195	6.11628	6.08126	5.95819	5.98682	6.06839	6.38989	5.78411	6.0007	5.8331	5.72066	6.15773	6.02667	6.20795
LOC100219238	6.77939	6.57817	6.73657	6.63447	6.85287	6.74487	6.79389	6.90242	6.94507	6.79517	6.64934	6.99005	6.80934	6.90812	6.77734	6.56111	6.67224	7.00654
LSS	4.68523	4.47965	4.46733	4.53677	4.69489	4.51949	4.53556	4.34019	5.14862	4.56559	4.52141	4.40235	4.52586	4.79804	4.69632	4.65713	4.80237	5.10089
NXPE3	4.04088	3.89106	4.35017	4.15918	4.35404	4.20824	4.24816	4.38175	4.30724	4.15248	4.36391	4.34108	4.37855	3.85312	4.01092	3.81576	4.6076	4.67097
OCIAD1	7.62061	7.51529	7.52202	7.63381	7.33174	7.73098	7.63218	7.6712	7.45539	7.57877	7.69426	7.7086	7.54562	7.40426	7.78509	7.81282	7.54503	7.81867
RNF17	1.83153	2.8155	2.88366	3.30038	2.05055	2.99052	2.83629	3.52051	2.8483	3.26712	2.88367	3.00901	2.57101	2.50351	2.69394	2.71217	3.24782	3.11078
SNX16	3.33686	3.7004	3.50161	3.61909	NA	3.77505	3.33838	3.50854	3.34073	3.87236	3.64827	3.7519	3.86966	3.68578	3.4834	3.58634	3.50519	4.04412
C5H11orf96	5.08994	5.40977	4.7564	5.56152	4.80718	4.90225	5.33762	5.08895	5.37624	5.51517	5.4476	5.59647	5.66545	5.84108	4.66669	5.79112	5.19768	5.80277
LOC105759167	2.95203	2.76093	2.43114	2.92086	2.46076	2.85619	3.07574	3.41807	NA	3.52974	2.48095	3.27857	3.09186	3.15828	2.5074	3.03049	2.4599	4.22024
PDIA6	NA	6.90109	6.91393	7.07288	6.8215	7.06274	6.99691	7.19258	6.91119	7.07475	7.04257	6.96067	6.88662	6.95523	6.94955	6.87261	7.06172	7.30069
KCTD12	7.7008	8.20611	8.14947	8.40608	7.64136	7.9067	8.0177	8.19416	7.95097	8.43312	8.11056	8.03213	8.55644	8.539	7.82447	8.08802	8.41425	8.52963
MICU2	3.58588	3.60185	3.75037	3.69022	3.80026	3.64804	3.62304	3.8939	3.47439	3.69466	3.76489	4.01416	3.5981	3.58752	3.55648	3.94731	3.80706	3.93572
PEX1	3.7181	4.05648	4.41449	4.07472	3.93572	4.18125	4.16484	4.43154	4.03025	4.15391	4.0185	3.72982	4.09092	3.72829	4.13542	4.37669	4.24307	4.86303
TAMM41	4.33997	4.29485	4.84036	4.81387	4.7805	4.61556	4.70138	5.29265	4.43669	4.92929	4.51886	4.65318	4.72103	4.34829	4.57045	4.93466	4.4713	5.22273
AIDA	5.12584	5.40946	5.31985	5.30492	5.4141	5.40529	5.36556	5.00595	5.35897	5.27581	5.39463	5.28188	5.47943	5.34094	5.33631	5.40978	5.26503	5.65814
CNKSR2	7.9091	7.78485	7.91497	8.13792	7.75921	8.03385	7.98542	8.20591	7.70164	7.91874	7.95875	8.07815	7.75258	7.72977	8.02686	8.14112	8.17072	8.23637
LOC100218883	1.22612	2.209	3.03057	2.19412	2.33542	2.27039	2.2466	2.39727	3.22186	2.63664	1.59038	2.49274	3.5096	3.34225	1.65001	2.25952	3.22665	2.58898
LOC105758515	4.2437	4.73083	3.76093	4.12397	3.74996	4.66217	4.48218	4.76764	4.17193	4.54088	4.9124	4.8431	4.46183	4.13209	4.03878	4.9838	4.60723	4.768
LONRF2	4.73171	5.03993	4.59405	5.23486	4.91888	5.01379	5.05778	4.88066	4.92577	5.00862	4.8933	5.10923	4.87479	5.13129	4.67403	5.26459	5.08201	5.14859
MUTYH	3.79063	4.27999	4.27212	3.98764	3.75333	4.11781	4.46093	4.22396	4.34033	4.65175	3.54803	4.51915	4.31631	4.19762	4.36868	3.88504	4.32068	4.83294
NAP1L1	7.25344	7.38789	7.21419	7.41515	7.11796	7.41692	7.55788	7.48465	7.38741	7.30972	7.49488	7.42002	7.49615	7.38369	7.07628	7.52014	7.43396	7.50632
SVIL	1.69235	1.41839	2.0001	1.62459	1.52116	2.03744	1.8499	1.93328	1.55104	1.81299	1.92236	2.01541	1.5058	1.63108	1.69209	1.70793	1.94189	2.024
EIF3F	6.68507	7.11065	6.78251	6.96902	7.22186	7.12312	6.90288	6.81634	7.0995	7.15789	6.85295	7.00993	6.9853	7.13372	7.06067	6.89009	6.93386	7.25123
LOC100220768	4.63025	4.9761	4.17113	5.03421	4.46141	5.00885	4.84509	4.73561	4.66798	5.29961	4.5404	5.08463	5.14905	5.20326	4.47415	4.82358	4.95308	5.2632
NRBF2	2.73845	2.12327	2.81945	2.04383	2.78825	2.82028	2.83745	2.90486	2.65497	2.5713	3.0238	2.35551	2.92764	2.43318	2.89707	2.73571	2.08589	3.44777
IPPK	5.56136	5.55518	5.40222	5.60266	5.51668	5.47412	5.60249	5.72199	5.48442	5.63748	5.64492	5.74479	5.58125	5.65124	5.35657	5.67668	5.52742	5.82455
MYOM2	1.17617	1.0304	0.745979	1.18369	0.7782	1.99228	1.28725	1.99388	1.54519	1.42907	1.02416	1.24106	1.00688	1.20839	0.821053	1.52339	1.72637	1.53931
NPM3	3.23198	3.7679	3.59512	2.41667	3.07302	3.93953	3.593	3.89134	4.17604	4.03441	3.71904	3.51819	3.36407	4.42829	3.06951	3.63153	3.50199	4.36028
NR2C2	4.84302	5.12492	5.07598	5.01874	4.95759	5.67081	5.70474	5.90364	5.12861	4.8648	5.63668	4.98201	5.55378	5.36903	4.70071	5.25266	5.3519	5.52495
OSGEPL1	2.95348	2.80113	3.47538	3.27907	2.25885	3.44514	3.63	3.57016	2.87092	3.76412	3.24781	2.67072	3.07582	3.0032	3.11379	3.328	3.26823	4.27119
SUGCT	3.10848	2.55937	3.27558	2.60256	2.83123	3.22121	2.80754	3.98445	2.48108	2.76309	2.81094	3.33429	3.10192	2.52151	3.714	3.8148	2.87484	3.84542
YWHAH	9.30663	9.36197	8.91658	9.33492	9.20097	9.13886	9.2444	9.1416	9.36077	9.56909	9.41342	9.34241	9.12391	9.50462	9.31298	9.56222	9.50419	NA
CEP41	3.99031	3.97145	4.31343	3.65741	4.07248	3.9328	3.8931	4.32097	3.9827	4.452	3.95042	4.24014	4.12576	4.0602	4.56039	3.73419	4.14411	4.71888
CPM	1.8124	1.84644	2.53017	2.01249	1.59467	2.42276	2.58145	2.66836	2.90819	2.37735	1.77283	2.72341	3.00352	2.58129	2.28773	1.8047	1.73529	2.75856
CRABP1	1.94283	2.15005	2.28124	2.33418	1.6502	2.29839	2.25169	1.71136	2.34309	2.13277	2.4731	2.42674	1.89131	NA	2.12081	2.2801	NA	2.79831
GDAP1	4.96719	4.98126	5.74079	5.31895	4.81508	5.63248	5.44017	5.77113	4.88335	4.79746	5.69825	4.73107	5.70262	4.92491	5.90094	5.57868	5.7015	5.73143
KIAA0895L	5.6968	5.96813	6.66975	5.86898	6.33437	6.15669	6.20076	6.69841	6.32793	6.37483	6.01173	6.25034	6.32371	6.27578	6.21112	5.82764	6.05993	6.782
LGALS8	6.5653	6.12648	6.39261	6.29139	5.78247	6.64903	6.38103	6.89709	6.66158	6.32583	6.38917	6.53205	6.19107	6.07646	6.67269	6.48497	6.5224	7.06873
LOC105758899	4.40483	4.65467	4.2542	4.18854	4.62628	4.73732	4.82679	4.80102	5.14338	4.90285	4.86503	4.41884	5.05954	5.05563	4.50445	4.11297	4.90996	4.69036
SCRN3	5.61791	NA	6.24398	5.73596	5.60052	5.96113	6.1724	6.26763	5.98715	5.58836	5.95234	5.99108	5.8977	5.76835	6.06171	6.07366	5.7608	6.3938
ABHD13	4.48181	4.43038	4.55676	4.49422	4.27507	4.77882	4.61188	4.8908	4.51172	4.75304	4.26589	4.58395	4.63569	4.8054	4.1827	4.76402	4.64281	4.91984
CTDSPL2	4.95943	5.13711	4.99446	5.12684	5.02729	5.12013	5.15304	5.06476	4.85757	4.9086	5.16128	5.12276	5.0429	4.99974	5.03709	5.17706	5.11134	5.46583
GRSF1	5.12999	5.2739	5.19369	4.77522	5.5345	5.21681	5.04343	5.02503	4.98883	5.31685	5.18261	5.19471	5.23207	5.27508	5.54131	5.42292	5.10891	5.68439
ICK	3.70483	3.22741	3.90516	3.22466	3.67225	3.59933	3.74207	3.73519	3.37106	3.44538	3.78096	3.49088	3.43613	3.59161	3.76548	3.59696	3.7716	4.09116
MFN1	7.12106	6.70444	6.99591	7.03706	6.99779	7.15422	7.04376	7.28891	6.97762	7.03135	7.1187	7.01996	6.91031	6.84317	7.0504	7.16011	7.01162	7.21665
RALGAPA2	4.57744	4.52427	4.29588	4.50961	4.34183	4.68002	4.61234	4.6602	4.53623	4.56472	4.50083	4.54325	4.61383	4.746	4.3164	4.62428	4.57018	4.73174
TMCC1	5.09442	5.06027	5.02869	5.24951	4.85498	5.17063	5.22196	5.49057	5.09134	5.33649	5.10942	5.38638	5.23094	5.14398	4.77	5.32252	5.16761	5.55033
WDR92	4.86758	4.65233	4.6603	5.01001	4.43053	4.95104	4.90522	5.10966	4.56562	4.75604	4.98994	5.02442	4.71256	4.76422	4.90826	4.89143	4.84176	5.14168
ATP5G3	10.3247	10.467	10.2948	10.2141	10.5295	10.4818	10.3411	10.5506	10.5478	10.7205	10.2639	10.6081	10.5472	10.6256	10.3494	10.2397	10.3387	10.8307
CCDC149	4.50297	4.46483	4.89657	4.76491	4.81466	4.85825	4.7493	5.2521	4.63503	4.96622	4.94749	4.66079	4.62591	4.44089	4.58066	4.85801	4.8893	5.02214
COG8	4.21805	4.72212	4.41277	4.516	4.62426	4.46278	4.44951	4.35692	4.5673	4.80051	NA	4.45134	4.61345	4.75755	4.93542	4.18581	4.70233	4.84885
CRYL1	5.42276	5.13107	5.97758	4.95477	5.45946	5.49697	5.51385	5.72539	5.33686	5.46615	5.71047	5.41828	5.5325	5.46274	5.87698	5.51523	5.26279	5.94244
LOC100231911	4.65008	5.24222	4.65103	4.82124	4.90177	4.86492	4.80365	5.39791	5.16314	4.93973	4.86421	5.08518	5.13717	5.30022	4.70649	5.03614	4.8558	5.41107
LOC105758562	4.28583	4.59325	4.57619	4.92996	4.55724	4.70947	4.91862	4.77981	4.47931	4.81791	5.16468	4.62085	4.61701	4.30056	4.14766	4.95123	5.12701	5.04382
LOC105759582	1.79646	1.0922	2.20032	1.65756	0.892432	2.02838	2.40858	2.39115	1.47406	2.13656	2.13427	1.55294	2.19797	1.5118	1.72475	1.81974	1.91726	2.33167
TUBGCP6	4.76361	4.35093	4.67128	4.37049	4.45207	4.78984	4.69992	4.8239	4.35137	4.64426	4.85615	4.47467	4.58433	4.42888	4.5315	4.74223	4.78396	5.04643
ZNF512	6.26828	6.27119	6.48546	6.4732	6.33955	6.51167	6.51511	6.35915	6.33798	6.22145	6.36885	6.30131	6.52165	6.31572	6.21327	6.55793	6.36552	6.80776
CSRP2	5.47024	5.78864	5.62737	5.60796	5.68489	5.79383	5.22546	6.12907	5.8691	6.32534	5.93635	5.69434	5.54746	6.12153	5.6285	5.5777	5.87022	6.20115
PDCD4	5.62048	5.79964	6.141	5.80221	5.75242	5.86831	5.79901	6.0407	5.75951	5.81959	6.06749	5.90347	5.94602	5.70069	5.88717	5.85111	5.77314	6.28335
RAB19	4.05099	NA	3.74009	NA	3.97726	4.43558	4.22494	4.66644	4.15726	4.3273	4.00054	3.87308	4.13452	3.97287	3.88409	4.40337	4.12978	4.56665
TSPAN5	6.41861	6.78205	6.68225	6.76176	6.6006	6.8705	6.67702	6.75094	6.65473	6.75941	6.80301	6.8986	6.7443	6.38432	6.80515	6.84838	6.56939	6.96933
CHM	5.94506	5.51424	5.78734	5.76759	5.83194	5.80191	5.83926	5.91256	5.69059	5.81959	6.14548	6.1638	5.64497	5.65078	5.79429	6.11411	5.7973	6.00269
EIF1AX	6.61765	6.96901	6.83211	7.17597	6.68151	6.97491	7.06156	7.16333	6.73976	7.04328	7.27239	6.97718	7.03091	6.90385	6.46822	7.06005	7.08091	7.33301
GRIP1	4.18157	3.92013	3.96214	3.99532	4.21027	4.39667	4.31213	4.80401	4.07449	4.01112	4.22179	4.23735	3.90806	3.78504	4.05406	4.64532	4.25093	4.5712
IL17RC	1.53185	2.17342	1.7418	1.92603	2.30839	1.60287	1.4318	1.90214	2.67293	2.81791	1.93231	2.18772	1.98191	1.98089	2.02617	1.81692	2.07122	2.88095
LOC100224313	5.88294	5.74338	5.7212	5.92209	5.61213	5.94006	5.8865	6.27284	5.75518	6.0372	5.84074	6.00763	6.01889	5.82808	5.68097	5.94539	5.82033	6.18265
P2RY1	9.39027	9.59787	9.86557	9.77692	9.54503	9.49082	9.64285	9.65828	9.43548	9.52741	9.82072	9.62272	9.75711	9.62747	9.85066	9.67451	9.58796	9.95741
ADGRA1	4.33289	4.36546	4.91205	4.47318	4.58476	4.62498	4.66935	4.622	4.45011	4.30181	4.9004	4.36262	4.49089	4.37018	4.22843	4.86528	4.92581	5.11909
CZH18orf25	4.55835	4.8029	4.61778	4.69742	4.60272	4.73759	4.72467	4.93977	4.67254	4.59037	4.79481	4.73373	4.66745	4.61403	4.71567	4.80706	4.97795	NA
DNAJB14	6.54746	6.7628	7.22213	6.98556	6.65621	6.84891	6.96451	7.22827	6.61092	6.90947	7.23551	6.88367	6.78302	6.68138	6.69861	7.11382	7.11054	7.30643
LOC100220098	5.79892	6.37438	6.9068	6.7073	5.90094	7.06146	7.11399	6.89765	6.49475	6.79671	6.85011	6.1427	7.1614	6.85855	6.05239	6.52431	6.60486	6.90702
LOC101232920	3.24237	2.73365	3.18712	2.95428	2.8792	3.12925	3.1108	3.32433	3.1522	3.0616	3.20249	3.61927	2.86854	2.59882	3.19757	3.40389	3.04825	3.68919
NDUFA8	6.17123	6.66965	6.19098	6.54935	6.70914	6.67797	6.73996	6.59472	6.99905	6.94869	6.58646	6.82272	6.88491	7.00648	6.0921	6.61621	6.67346	6.52267
SNX13	5.78948	5.522	5.89301	5.75618	5.35577	5.92117	5.85496	6.27921	5.80056	5.82218	5.90151	6.06423	5.70983	5.61355	5.39784	6.08736	6.00904	6.16154
TLK1	5.30003	5.58913	5.845	5.89388	5.72044	5.73999	5.73823	5.79231	5.47744	5.62618	6.05546	5.67509	5.61385	5.33601	5.66082	5.85287	5.9261	5.90591
VDAC2	9.12243	9.05225	9.15047	9.18742	9.0343	9.16203	9.1499	9.35143	9.02291	9.31461	9.27039	9.18582	9.17564	9.01691	9.1204	9.29654	9.25356	NA
AKR1A1	4.19315	4.59114	4.95967	4.65291	5.01258	4.65852	4.58948	4.60643	5.14431	5.28164	4.85804	4.88742	5.34061	4.72742	4.77522	4.08125	4.78895	5.19575
BTAF1	5.31411	5.10633	5.80301	5.32246	5.10534	5.61505	5.42758	5.91451	5.16126	5.17277	5.5941	5.38536	5.44891	5.18565	5.25266	5.64391	5.57054	6.07613
IFT43	3.34736	3.27817	3.52122	3.13659	3.57225	3.84042	3.24107	3.65187	3.64195	3.39365	3.59457	3.83528	3.43661	4.17218	3.52943	3.25852	3.17597	3.81369
KLHL8	4.51305	4.80539	4.99671	5.09498	4.80001	4.86621	4.70969	4.99945	4.65865	4.90961	5.10267	4.78931	4.91328	4.59839	4.83077	4.66979	5.19975	5.35702
SLC4A1AP	4.96467	4.58928	5.66888	5.28696	4.73039	5.49786	5.21459	5.51974	5.16061	4.77668	4.8241	5.07469	5.33544	5.04125	5.31378	5.16561	5.18512	5.78864
SNX17	5.66037	6.16303	6.09459	5.87624	6.15351	5.94332	5.88961	5.89168	6.19152	6.31089	5.78021	6.04471	6.264	6.20441	6.12922	5.83719	6.06466	6.37668
SNX4	5.09891	5.0649	5.62994	5.31316	5.26079	5.50779	5.47778	5.69044	5.12294	4.96779	5.54613	5.51697	5.19434	5.04023	5.60094	5.38485	5.19048	5.89081
THSD7B	2.87129	3.75659	4.00553	3.58616	2.86478	3.37255	3.92088	4.48723	3.66627	3.52818	3.42631	3.69324	3.72592	3.68201	3.26436	3.81706	3.89549	4.27206
C1H12orf57	6.33002	6.58082	5.62527	6.54367	5.48572	6.37921	6.13355	6.30548	6.1568	6.30222	6.59935	7.2182	6.30351	6.72846	5.99697	6.79288	6.40954	7.05002
CFAP69	1.71695	2.22247	2.79931	2.39666	2.39556	2.64686	3.00791	2.84558	2.15531	2.16437	2.85681	2.80562	2.29783	2.69632	1.92155	2.08464	2.58983	2.9452
CHST8	2.61619	2.89908	1.93136	2.60191	2.38349	2.82232	2.74925	2.70905	2.61617	3.30005	3.21428	2.735	2.32296	2.45204	2.79803	2.92471	2.90137	3.01789
PRKAR2B	7.0744	7.33659	7.13068	7.64187	7.12049	7.49055	7.55529	7.47524	7.1343	7.43411	7.80116	7.43895	7.4387	7.31049	6.9489	7.61011	7.39675	7.57697
CDH12	3.37672	3.53017	3.60304	3.78571	3.57944	3.67296	3.75163	3.64607	3.47909	3.48139	3.66496	3.78482	3.82462	3.31869	3.4602	3.76766	3.61177	3.82725
FPGT	5.42581	5.26558	5.56278	5.84512	4.92632	6.13255	6.07053	5.18723	5.26902	5.04187	4.89479	5.55589	5.41113	5.33633	5.62757	6.35913	5.82726	6.67928
KCNQ3	7.38954	7.05282	7.41146	7.37081	7.2339	7.5282	7.53727	7.49157	6.99584	7.58006	7.60392	7.43667	7.50855	7.31695	6.95021	7.41634	7.49263	7.79251
PAPSS1	6.7524	6.52503	6.62748	6.58293	6.56129	6.5986	6.88108	6.82772	6.45836	7.07243	6.78698	6.56374	6.9011	7.03761	6.47945	6.54646	6.62121	7.30259
RGS9BP	3.06261	3.05423	2.73569	3.10073	3.16031	3.25514	3.13391	2.71519	2.96102	2.92092	3.41353	2.97114	2.99126	2.5297	3.30311	3.69182	3.37233	3.49552
AGPS	5.20205	5.1046	5.24255	5.08701	4.96752	5.40258	5.53783	5.28727	5.17908	5.07541	5.40793	5.2379	5.23927	5.24694	4.96282	5.2076	5.28255	5.5858
CCDC66	5.15209	4.77858	4.68089	4.86639	4.51642	5.267	5.08459	5.47999	4.87727	5.07513	4.65264	5.42504	5.20948	4.61448	5.12794	5.52855	4.93072	5.29265
LOC105760928	NA	6.91032	6.29634	6.8107	6.8147	6.6268	6.96063	6.41197	6.88279	6.72856	6.61344	6.81365	6.86202	7.21536	6.90058	7.01162	6.93934	NA
NDUFS8	8.14033	8.58574	8.3857	8.42908	8.70158	8.46959	8.40142	8.39956	8.70044	8.32438	8.2677	8.52085	8.38629	8.6355	8.45257	8.34588	8.52665	8.87711
OSBPL11	4.24493	4.52237	4.48017	4.58308	4.26295	4.67785	4.55868	4.5233	4.37775	4.39217	4.75214	4.43926	4.47448	4.41224	4.27304	4.39565	4.68407	4.88355
OTUD1	4.60728	4.85118	4.5028	5.03704	4.72864	4.74098	4.83404	4.73951	4.49651	5.05001	4.8185	4.88783	5.00446	4.76828	4.64225	4.89482	4.87718	5.00455
RNF219	5.64293	5.75502	5.99224	5.82136	5.87558	5.89046	5.87597	5.91894	5.63372	5.5162	5.92561	5.93099	5.74754	5.76491	5.87943	5.91294	5.85811	6.13964
RPS7	8.81316	9.01139	8.6878	8.66984	8.98056	8.76334	8.90307	8.61947	8.97344	8.88735	8.95063	8.92395	8.93844	9.15292	8.94869	8.96276	8.75472	9.12505
SSTR1	5.09088	5.26288	5.90351	5.3733	7.01687	5.5701	6.10121	6.63173	6.48235	5.02625	6.52907	4.83747	5.91803	5.75177	5.22803	6.06643	6.5234	6.39862
SUCLA2	7.72661	7.50859	7.66312	7.77634	7.41117	7.85222	7.87517	8.14056	7.54921	7.83588	7.75866	8.06345	7.76703	7.4677	7.48779	7.96827	7.77251	8.0268
ADGRL4	3.3937	3.27447	3.70638	3.73819	3.12138	3.54654	3.3111	3.50916	3.36164	3.09712	3.28644	3.48062	3.58328	3.56001	3.57844	3.70904	3.56978	4.082
CLN5	5.13921	5.29913	5.51581	5.10946	5.2287	5.4106	5.08569	5.38716	5.46365	5.51902	5.11316	5.18389	5.28998	5.36871	5.47577	5.22961	5.48584	5.63037
LOC100190143	7.51614	7.4111	7.97435	7.61524	7.53494	8.24579	7.6975	7.28669	8.14252	7.51967	8.06966	7.41806	8.47305	8.14937	7.79113	7.6389	8.13581	7.68807
RMND1	5.67721	5.43461	5.57246	5.53338	5.43162	5.66181	5.56828	5.94978	5.36669	5.63981	5.8332	5.94021	5.52712	5.40613	5.63915	5.80716	5.57441	5.87953
TBL3	4.85774	5.13803	4.6159	4.91288	5.42451	5.29034	5.05706	4.89617	5.29505	5.27678	4.91583	5.28871	5.13345	5.24976	5.2401	4.90398	5.02733	NA
XPO5	6.18939	6.2067	6.2946	6.1632	6.35081	6.28774	6.1467	6.38982	6.32161	6.3314	6.16792	6.26727	6.26025	6.3833	6.15519	6.27054	6.17608	6.55208
YEATS4	5.88599	5.76439	5.62665	5.88364	5.82115	5.92904	5.755	6.14417	5.73456	6.02484	5.96034	6.15446	5.77291	5.72956	5.82462	5.86371	5.80226	6.16588
FNBP4	6.35913	6.49853	6.73042	6.57991	6.62422	6.67506	6.45713	6.88634	6.60403	6.71387	6.38477	6.64924	6.43962	6.65886	6.60386	6.55118	6.60674	6.86209
LOC105759530	5.58183	5.07205	5.56235	5.291	5.67068	5.68846	5.48833	6.27105	5.71526	5.7501	5.20987	5.94765	6.0115	5.65361	5.33531	5.36879	5.39693	5.97446
MITD1	3.61047	4.01592	3.98042	4.23281	3.89966	3.73353	3.80072	4.0911	3.70361	4.04662	3.88774	3.95882	3.75354	4.04753	3.90988	4.02914	4.12345	4.51219
DYNLT1	5.5018	5.99804	5.59657	5.8094	5.804	5.70464	5.76919	5.78086	5.80616	5.7661	5.73285	6.10987	5.80983	6.09715	5.65611	5.99671	5.70468	5.94474
KCTD6	6.11207	5.6696	5.68617	5.97512	5.88136	5.77393	5.82791	5.96207	6.04521	6.14958	6.0498	6.42939	5.76385	5.79046	6.18863	6.26641	5.68612	6.2024
MBOAT2	4.30964	4.69087	5.04085	4.95909	4.62855	4.86683	4.91021	4.9528	4.60024	4.38633	5.36587	4.59643	4.83251	4.74467	4.44189	5.02621	4.8975	5.2756
MRPL12	7.24741	7.53082	7.21754	7.25927	7.39201	7.53984	7.484	7.33049	7.698	7.84078	7.284	7.69451	7.65841	7.72312	7.343	7.50069	7.38175	7.42325
RBP4	2.25987	0.963069	2.05062	1.22578	0.994374	1.50242	2.18292	2.8081	1.87397	3.1456	2.56576	2.34786	0.894674	2.44228	1.75614	2.28542	1.67916	2.73154
SECISBP2L	5.51802	5.61155	5.73162	5.60348	5.30399	5.85716	5.90471	5.79951	5.64806	5.47554	5.85028	5.64867	5.59303	5.79888	5.27138	5.78986	5.86122	6.01203
DCAF4	4.87646	5.27492	5.63604	5.19688	5.61265	5.40084	5.40495	5.43532	5.57072	5.75661	5.4285	5.09508	5.36478	5.41157	5.36795	5.14676	5.15877	5.9479
TUBGCP3	4.4962	4.71815	4.54949	4.78966	4.49176	4.80384	4.83891	4.79343	4.65827	4.45123	4.69282	4.54087	4.83985	NA	4.59976	4.58843	4.70073	5.02856
CNBP	7.96847	7.82646	7.71091	8.0213	7.75774	8.1408	8.01241	8.01342	7.77989	7.93402	8.08089	8.06884	7.86592	7.85487	7.95863	7.97007	8.03982	NA
FOXO1	6.4067	6.50653	5.99376	6.57585	6.15876	6.70325	6.54808	6.36357	6.4104	6.43226	6.40746	6.73869	6.6892	6.68757	6.19152	6.76739	6.59308	6.4692
LOC101233084	2.42506	1.97366	2.06992	2.19108	2.24396	2.7529	2.41583	2.49997	2.27068	2.3053	1.89472	2.60753	2.37829	1.51072	3.17095	2.25282	2.23925	3.25506
NPC1	6.09188	5.84048	6.03076	5.70857	6.03932	5.94373	5.989	6.23878	5.90177	5.78972	5.94323	6.11251	5.9544	5.86124	6.16366	6.28961	5.93229	6.29459
PAPOLG	1.057	1.64153	1.47699	1.88828	1.62213	1.85742	1.65446	2.37276	1.79262	1.92905	1.8066	2.00285	1.28142	1.5509	2.04047	2.14555	1.75177	1.34736
TCEANC	2.93589	3.59266	4.00739	4.10865	3.50555	3.65954	3.76905	4.08895	3.68202	4.04959	3.51273	3.38722	3.46748	3.77958	3.33425	4.05644	3.7617	4.30997
CEP192	1.88926	1.97675	2.74951	2.19852	2.19823	2.64004	2.43725	2.72257	2.09853	2.21579	2.27372	2.03549	2.4431	1.96021	2.38789	2.15295	2.60899	2.62972
FBXL3	5.31121	5.72944	6.19315	5.80868	5.41767	5.64913	5.76836	5.92009	5.68524	5.68217	5.97245	5.62748	5.91589	5.56659	5.52716	5.62533	6.03119	6.54382
LOC105760071	0.994955	2.1845	0.647836	2.4474	0.523072	2.24155	1.31649	2.9951	1.86872	1.92646	0.949257	2.06342	2.29996	2.33483	1.00123	1.85326	2.5093	2.65271
MPI	4.46403	4.78686	5.03636	4.76139	5.51062	4.90073	4.74146	4.54457	5.04586	4.93381	4.91274	4.81466	4.9424	5.18522	4.89314	4.59319	5.05984	5.31418
MRPL19	6.82914	6.72676	6.95795	6.84095	6.81974	7.08439	6.87128	7.43312	6.81517	6.91393	6.97114	7.13585	7.04173	6.70423	6.44903	7.09067	7.00852	7.40297
RGS7BP	5.55342	5.72793	5.57065	6.27493	5.46972	5.79016	6.18775	6.30878	5.70139	6.00989	6.23684	6.3063	6.02823	5.82487	5.62642	6.36213	6.28553	5.52934
XK	2.30816	2.18184	2.62998	1.89292	2.76326	2.83117	2.68047	2.98479	2.75923	2.36788	2.72259	2.36541	2.71132	2.46578	2.12209	1.87588	2.92282	3.12208
ECHS1	6.22111	6.7103	6.66791	6.75669	6.64235	6.85232	6.36895	6.53604	6.81881	6.7113	6.47809	6.42443	6.7967	6.8318	6.64109	6.29363	6.82716	7.19527
ELMOD2	4.47168	4.73592	4.6835	5.00026	4.44773	4.81199	4.83327	4.83676	4.51011	4.92534	5.07892	4.99503	4.54818	4.59305	4.53969	4.979	4.6187	5.25356
FBXL21	4.87759	5.44902	5.63643	5.54554	5.42554	5.66039	5.40166	5.8502	4.90963	5.52244	5.43902	5.30318	5.31728	5.54809	5.4951	5.48412	5.64759	5.72056
FRA10AC1	5.43465	5.14518	5.18949	5.20397	5.36233	5.586	5.43419	5.95551	5.29577	5.00532	5.4414	5.73527	5.17112	4.84111	5.58085	5.58459	5.61343	5.752
LOC100224270	6.77998	7.20994	7.01127	7.46829	6.7225	7.26567	7.20724	7.33865	6.95389	7.18772	7.22313	7.66089	7.09916	7.05013	6.78015	7.43386	7.22272	7.49693
LOC100231318	1.95902	3.15061	3.6113	2.43487	3.56672	3.34129	2.9968	2.66986	3.81914	2.67515	3.6744	2.99029	2.54824	3.08097	3.10901	2.92592	3.09168	3.85175
LOC105759848	1.51987	2.12758	1.84381	2.11887	1.79181	2.70773	2.22293	2.57272	2.42307	2.51924	NA	1.96719	2.10755	1.99733	2.2619	1.35758	1.86436	2.95276
NANP	4.21511	4.65122	4.18436	4.42774	4.24517	4.71055	4.72167	4.92087	4.32473	4.23861	4.69742	4.59951	4.30433	4.66996	4.16179	4.5794	4.65556	4.80224
SNX10	5.51197	5.79005	6.3714	6.19054	5.99982	6.16609	6.19616	6.65778	5.73325	5.79819	6.52465	6.40029	5.58541	5.92727	5.85536	6.15577	6.21285	6.44357
ZNF644	5.24635	5.49945	5.24358	5.65388	5.13323	5.51679	5.56081	5.55321	5.36476	5.3894	5.46206	5.43405	5.48308	5.43277	5.07866	5.81888	5.59302	5.70472
AP2A2	7.63627	7.81772	7.95515	8.09416	7.81376	7.98672	8.04611	8.24836	7.78491	7.83097	8.21542	8.01236	7.73735	7.63017	7.67016	8.0897	8.16282	8.19749
C7H2orf66	1.7048	0.609052	1.06519	1.02545	1.03176	1.1177	0.185926	0.99344	1.5333	0.710576	1.11696	1.63244	0.873036	1.06332	2.00686	1.92706	1.35381	1.97588
LOC105760562	2.15052	1.70754	2.58323	1.92455	2.37058	2.73759	3.16091	2.52579	2.81193	2.02616	2.59035	1.6226	2.6201	2.91519	2.54111	2.64746	2.3751	2.14142
N4BP2L1	0.705627	1.31961	1.3934	1.14697	0.828096	1.49948	1.75089	1.82496	1.16327	0.137343	2.19108	0.815094	1.45569	2.21473	0.901305	0.927935	1.56565	2.46581
LOC100230597	5.82967	6.52947	6.41305	5.83731	6.38113	6.67748	6.53562	7.23	6.62733	6.81987	6.39279	6.46407	6.685	6.78773	6.17278	6.15347	6.68718	6.35762
MAD2L2	3.92561	3.75989	3.92609	3.55432	4.07357	4.0941	3.86669	4.00873	4.44587	4.20557	3.79161	4.37885	4.11441	4.24145	3.84575	3.5742	3.87333	4.3473
MAGT1	4.82679	4.66377	4.58817	4.70813	4.73889	4.87352	4.76979	5.0038	5.06895	5.00386	4.47544	5.22587	5.35541	4.84423	4.60535	4.73896	4.66154	5.17664
MNAT1	4.3451	4.18033	4.5638	3.93618	4.18028	4.34926	4.22972	4.5866	4.51089	4.23603	4.21558	4.27719	4.47265	4.43137	4.58303	4.22997	4.2021	4.80411
NMT2	5.21736	5.48667	5.83992	5.74756	5.76152	5.79302	5.52318	6.06267	5.43586	5.33581	5.65325	5.63947	5.66769	NA	5.91433	5.60593	5.86419	5.63113
VRK2	2.40439	1.97857	3.01753	2.73044	2.28674	3.27489	2.72763	3.63681	2.39444	2.84367	2.32525	1.9849	2.26564	2.95605	2.8086	3.25804	2.40229	3.48704
AUH	5.48093	5.58067	5.53168	5.77657	5.30146	5.74261	5.89396	5.95635	5.61839	5.73657	5.85806	5.68325	5.71419	5.75616	5.35504	6.17261	5.95879	5.48653
FXR1	6.43242	6.35843	6.24787	6.54103	6.21374	6.47634	6.47786	6.7496	6.31267	6.37721	6.54174	6.71101	6.37888	6.28936	6.31292	6.51357	6.5043	6.68614
LOC100190466	6.06255	5.98777	6.01612	6.08425	5.97565	5.89593	5.78078	6.12397	5.95883	6.28509	6.34172	6.16122	5.99132	6.03751	6.50531	6.30801	5.86448	6.3123
LOC105759379	2.01156	2.31609	1.69797	2.31928	2.09484	2.38625	2.06096	2.35706	2.17684	2.18339	1.9061	2.08535	2.01964	2.25042	1.92315	2.3353	2.34424	2.75541
PANX2	6.29846	5.77378	6.23505	5.94569	6.04591	6.43086	6.10315	6.55348	6.03749	6.01867	6.32646	6.21299	5.94639	5.79617	6.18781	6.39357	6.09255	6.76784
SERPINC1	1.24359	1.33975	0.955215	1.18882	1.16966	1.10351	1.17348	0.784977	1.26127	NA	1.23012	1.26306	NA	1.43325	1.6284	1.24396	1.40847	1.43608
ZNF438	3.83218	4.26489	3.93088	4.4186	4.11903	4.10267	4.35734	4.23245	4.26545	4.36833	4.29765	4.13371	4.08151	3.963	4.01346	4.23312	4.20901	4.46024
AMT	3.33449	3.76188	3.83851	3.20813	3.5493	3.78039	3.35279	4.08714	3.68849	3.88717	3.39497	3.69184	3.51819	4.07627	3.51373	3.52981	3.68631	4.37701
GCSH	5.76271	6.19289	5.84155	5.98727	6.04034	6.17906	6.06115	6.38455	6.3176	5.89354	6.11157	6.26458	6.14545	6.13404	6.01322	6.16672	5.5854	6.52547
GPM6B	9.64571	10.1648	10.3881	10.3926	10.2872	10.3842	10.453	10.7932	10.0678	10.2968	10.8016	10.261	10.1048	10.0206	9.82761	10.3934	10.3818	10.5803
MGAT2	NA	5.65439	5.29769	5.24124	5.55214	5.52591	5.46717	5.34938	5.58402	5.49426	5.44207	5.40194	5.66331	5.8195	5.41614	5.40171	5.72441	5.77135
MRPS11	6.87267	7.12909	7.18823	6.96273	6.85784	7.10574	6.83206	7.11092	7.49343	7.17248	6.84623	6.75959	7.56905	7.28182	7.21613	6.97543	7.18847	7.51049
NDUFA9	7.85771	7.91018	7.83292	7.75181	8.04615	7.95789	7.68158	7.99202	7.99955	8.0868	7.85439	7.9961	7.79247	7.88265	8.11648	7.77183	7.90255	8.2591
PECR	2.98172	3.77097	3.40413	3.53805	4.06979	3.50205	3.55399	4.61384	3.44945	2.91063	3.76262	3.6103	3.64592	3.45474	3.32057	4.12323	4.14541	4.00881
PEX3	6.27854	6.45514	6.28467	6.62508	6.34597	6.59965	6.32059	6.91893	6.31894	6.54289	6.5469	6.56102	6.64156	6.14287	6.41239	6.49611	6.41346	6.89821
STX7	6.85901	6.71683	6.89861	7.11896	6.66311	7.1707	6.79574	7.34806	6.93753	6.66499	7.1649	7.11385	6.64517	6.59799	7.05179	6.9889	7.04299	7.42102
SUGT1	6.47113	6.17337	6.32218	6.24324	5.88943	6.13434	6.19794	6.29462	6.11341	6.39474	6.50088	6.59241	6.34551	6.39719	6.29313	6.49385	6.37697	6.56938
TNKS2	6.80461	6.93719	6.47715	7.02731	6.73255	7.00596	7.17568	6.74034	6.8361	6.93152	7.04002	7.05049	6.85112	6.8226	6.73131	6.91136	6.9154	7.14607
LOC101233514	1.4315	1.77017	2.01398	1.21211	2.49964	1.67077	2.1177	1.96194	2.03726	1.94274	1.26082	2.6002	2.03061	2.72629	1.28106	1.59113	2.24086	2.48526
LOC105759145	1.81771	1.78345	1.79416	1.68327	2.20592	2.7178	1.63235	2.43458	2.13854	1.68968	2.09263	1.47717	2.05391	1.942	1.77273	2.4322	2.16213	2.28016
SAV1	5.31366	5.14073	5.08473	5.24737	5.41009	5.10522	5.12255	NA	5.3906	5.28884	5.1108	5.43003	5.17711	5.30663	5.44936	5.1924	5.33927	5.39938
TBP	5.77824	5.5971	6.11281	5.88403	5.97598	5.75183	5.79238	6.22563	5.39761	5.47639	5.97503	6.13244	5.56367	5.86086	6.11984	6.21872	5.92655	6.39591
LOC105759336	2.38352	2.85842	4.21791	3.65234	4.16068	3.59543	3.81397	4.68393	3.86214	3.48225	3.93805	3.31401	4.01719	3.12836	2.57776	3.85872	3.46521	4.12352
AOAH	2.69542	3.63308	3.68371	1.61832	0.861821	3.40843	5.24082	4.49564	4.27016	3.47206	4.85451	2.24181	4.7759	4.85104	2.218	2.33655	5.10188	4.81387
CLDN12	5.4483	6.00281	6.00278	6.12409	5.71487	6.03138	5.88375	6.24597	5.41855	5.50562	6.06287	6.2458	6.18423	5.83096	6.07321	5.88746	5.97762	6.30646
CLPX	6.89616	6.8656	6.98242	6.82483	6.51992	6.91287	6.89068	NA	6.79769	6.9013	7.1201	7.18048	6.86126	6.72114	6.70008	7.28492	7.04455	7.2176
GPI	8.72581	8.50856	8.83599	8.38588	8.87926	8.57343	8.65213	8.67715	8.63639	8.99164	8.65733	8.72469	8.5125	8.66289	8.88389	8.65589	8.72654	9.09198
MPHOSPH8	4.5629	4.5898	4.44281	4.64457	4.6428	4.78613	4.83364	4.61693	4.72055	4.75827	4.60525	4.42388	4.79093	4.36849	4.48207	4.64174	4.85053	4.9141
PTCD2	4.37959	4.41468	4.41979	4.69214	4.3169	4.69159	4.79289	4.75839	4.3469	4.77001	4.89629	4.67181	4.65266	4.44961	4.26811	4.75648	4.67933	4.49532
PTPRF	5.98512	5.95629	6.0923	6.00853	NA	5.95922	6.03813	6.10727	5.98793	5.84309	6.17429	5.9632	6.07699	6.09548	6.20351	5.87822	6.15342	6.17338
RPL29	7.55529	7.9548	7.48999	7.75689	7.77695	7.91953	7.91821	7.84753	8.06064	8.0748	7.82484	7.87715	8.13749	8.08857	7.34616	7.75271	7.83548	8.04026
SPRY2	4.5868	4.1074	4.62938	4.32751	4.69454	4.51042	4.82642	4.64306	4.58865	4.3066	4.60687	4.51004	4.6034	4.34945	4.72387	4.57612	4.51892	4.57082
SULT4A1	9.66922	9.33108	9.1103	9.39245	9.06815	9.62855	9.43588	9.77419	9.24014	9.50467	9.50934	9.56446	9.56939	9.07856	9.38702	9.80792	9.53207	9.89551
ALDH18A1	4.95406	4.65467	4.87314	4.59303	4.80921	4.99157	4.88711	5.10432	4.97815	4.87076	4.71937	4.8898	4.96382	5.02921	4.74007	5.05369	4.5081	5.35876
CNOT11	4.5482	4.74372	4.6817	4.70444	4.73856	4.59927	4.64309	4.75917	4.92268	4.81082	4.74106	4.43997	4.62096	NA	4.81264	4.70517	4.70116	5.02247
LOC100230634	8.04554	7.98687	7.94443	8.2937	7.72687	8.33149	8.18399	8.44215	7.54791	8.36855	8.49716	8.39022	8.17239	8.04797	8.09383	8.05416	7.93781	8.72545
GLA	2.41822	2.55295	3.09434	2.60763	3.11572	2.68535	2.64585	3.09893	3.02038	2.8329	3.05172	2.31101	3.15395	2.93241	2.51777	2.28804	3.06843	3.53273
KLHL24	4.8458	4.80908	5.21253	NA	4.83523	5.14218	5.08934	5.38069	4.91542	4.7948	5.26598	5.10636	5.01183	4.80772	4.73859	5.32852	5.08007	5.26151
LOC100223824	2.44046	1.7572	2.20199	3.1683	3.94135	3.18785	3.18292	1.39778	3.16854	2.69039	2.29035	3.11605	2.83749	4.13051	4.93713	2.94557	2.72183	2.36057
LOC100229760	9.4959	9.77017	10.0173	9.59103	9.46824	10.0066	10.1198	9.96228	9.73058	10.0094	9.64677	10.3783	10.0667	10.2239	9.67333	9.68784	9.77135	9.9058
LOC105759243	2.163	2.92462	2.23179	3.66358	3.21307	3.12449	3.25774	3.52886	3.02301	3.02825	3.80537	2.61758	2.61566	3.32428	1.86052	2.86734	2.84254	4.36602
LOC105760176	0.137304	1.26408	3.2194	1.89586	1.17678	3.26562	3.50422	3.48792	2.83313	2.85101	4.33769	3.00675	2.79287	1.76474	0.0154909	1.25054	2.29979	3.01184
SCN1A	7.0957	7.08015	7.63368	7.23107	6.98848	7.72869	7.64247	7.80193	6.85168	7.45262	7.58638	7.6006	7.62089	7.09525	6.92163	7.44178	7.57071	7.69961
SNX6	5.03763	5.12629	5.0087	5.1587	4.92286	5.08652	5.15894	5.31797	5.03699	5.22082	5.38053	5.24673	5.23584	4.8579	4.77096	5.39913	5.15797	5.51427
TEX9	3.09215	2.26933	3.02535	2.62336	2.34023	3.39174	2.93306	3.32904	2.95037	2.49401	2.95973	2.89336	3.08183	2.82096	2.13404	3.15658	3.20682	3.54315
ATF2	6.53344	6.80852	6.72674	7.08587	6.54894	6.94694	6.99114	7.27723	6.62858	6.82163	7.02467	7.06708	6.7484	6.61392	6.45943	7.05756	6.99169	7.17337
ATP5O	9.43975	9.61969	9.68175	9.5464	9.78282	9.69858	9.69864	9.55758	9.85715	9.51557	9.43355	9.61723	9.64137	9.83531	9.73302	9.51891	9.61407	9.86004
FGFR1OP2	6.21983	6.14243	6.71073	6.52489	6.20781	6.39314	6.42972	6.8043	6.05857	6.41971	6.40918	6.20885	6.47534	6.33183	6.62037	6.34715	6.53829	6.76707
LOC100228990	4.98084	5.34322	4.82703	5.40914	5.35391	5.34355	5.21662	5.45974	5.48409	5.52347	4.88744	5.25361	5.56075	5.54078	5.26237	5.29502	4.98054	5.54333
LOC100231659	4.37529	5.26593	4.84119	5.07258	4.66952	5.17542	4.95551	5.06365	4.74616	5.05456	5.05916	5.57601	4.99884	4.74196	4.42921	5.3822	5.0333	5.47158
MEA1	7.173	7.55598	7.38062	7.38338	7.62776	7.50818	7.41781	7.58229	7.63931	7.48404	7.38144	7.57625	7.43762	7.56194	7.53161	7.17001	7.41142	7.76546
RABL3	4.87934	4.81379	5.31007	4.84771	5.06987	5.06202	4.85246	5.41019	4.73745	4.8804	5.0492	5.02236	4.85024	4.96825	4.94872	5.1324	5.16536	5.45774
SERPINB6	0.675357	1.4216	1.64387	1.4671	0.794019	1.21133	0.486376	2.26257	1.10905	1.35558	2.04749	1.53646	1.61386	1.40188	1.38904	1.25386	1.13015	2.27018
XRCC6	5.72308	5.34772	5.92642	5.22376	5.5267	5.62445	5.60366	6.18207	5.5007	5.46828	6.0337	5.46647	5.52978	5.38742	5.853	5.59949	5.7809	6.35382
DCLRE1B	2.45338	3.21437	2.70665	3.34084	2.80637	3.07322	3.52119	4.26582	3.56936	3.95799	2.86851	3.61365	2.40863	3.9785	3.03759	2.83429	2.9557	3.87149
DHX15	NA	7.5325	NA	7.5061	7.46028	7.66475	7.65897	7.64502	7.51627	7.61526	7.50234	7.64039	7.60692	7.48326	7.5084	7.59758	7.601	7.64967
FAM184B	2.47657	2.31547	2.86604	2.29735	2.0761	2.02693	2.65954	3.0381	2.6319	2.31851	2.45387	2.47706	2.68877	2.47739	2.24612	2.6618	2.70659	3.34198
LOC100218766	1.7285	2.60325	2.54226	2.60891	3.03882	2.49883	2.53444	2.00823	2.88122	2.47068	2.45435	2.24772	2.0836	3.07339	2.75038	2.57432	2.57426	2.87984
LOC105758605	4.80697	4.63422	5.4377	5.01517	4.87572	5.27523	5.37057	6.13001	4.88296	5.48569	5.40352	5.17013	5.15871	5.13865	4.26286	5.33018	5.39272	5.54614
LOC105758665	3.88788	4.41346	4.29774	4.28436	4.02568	4.07491	3.9455	3.97641	4.31015	4.62563	3.90756	4.25865	4.55082	4.88787	4.73015	4.122	4.12525	4.7401
LOC105759192	4.0676	4.03238	4.86479	4.69593	4.18837	4.23841	4.07481	4.798	3.97615	4.12394	4.19922	4.48839	4.2254	4.23424	4.40809	4.80575	4.89401	4.86012
LOC105759385	3.86715	3.90967	2.7882	3.91766	2.77009	3.56678	4.05255	3.83885	3.67837	3.46503	4.56541	4.20428	3.82061	3.83788	3.33115	4.31469	3.5511	4.58518
PRKCE	5.54142	5.48517	5.37915	5.66841	5.5685	5.73021	5.76001	5.88975	5.61354	5.50659	5.87974	5.64111	5.34709	5.39338	5.36701	5.84195	5.8346	5.76469
RCHY1	6.29886	6.62893	6.45098	6.57668	6.54204	6.4834	6.39921	6.91095	6.43877	6.39537	6.61413	6.63018	6.49315	6.48854	6.50912	6.78752	6.42544	6.80898
GEMIN8	4.17259	4.40933	4.96023	4.45834	4.63597	4.65974	4.72779	4.81823	4.83575	4.51037	4.94834	4.15506	4.9885	4.62927	4.52989	4.31344	4.3442	5.29079
LOC101233971	7.97856	8.06008	7.83997	7.83156	7.85231	7.95921	7.97717	7.95914	7.96224	7.96032	7.93561	8.05829	8.13369	8.28068	7.88763	7.98629	7.92732	8.17868
PPIL1	2.96593	2.90597	2.5371	3.25849	3.18793	2.71464	3.23668	2.63752	3.15322	3.21296	3.16591	3.11675	3.24925	3.49531	NA	2.97536	2.65754	3.39369
PPP3R1	9.5119	9.41876	9.40548	9.70092	9.36654	9.59003	9.62258	10.0741	9.02662	9.7308	9.89778	9.84934	9.46291	9.13351	9.5125	10.0005	9.72117	9.92938
CRELD1	7.07101	7.51423	7.00763	7.0849	7.37575	7.44629	7.4567	7.40708	7.50963	7.66539	7.32972	7.43526	7.47615	7.56435	6.92434	6.8137	7.55631	7.94464
DCAF6	6.59284	6.72728	6.4577	6.54834	6.78413	6.83956	6.75413	6.4808	6.78166	6.79094	6.90414	6.45252	7.0106	6.91153	6.73028	6.47211	6.60908	6.94965
DDIT4	5.5264	5.44324	6.64591	5.33986	5.2153	5.7523	5.75058	6.47039	6.1095	5.5689	5.6946	5.86852	5.93371	5.53188	5.88232	5.48925	5.95609	6.96862
LOC105758533	3.81559	2.7283	3.69716	2.8195	3.89518	3.69363	3.29132	4.25046	3.45789	2.84044	3.58341	3.4498	3.49942	3.18526	3.55237	3.88158	3.55246	4.2475
PAPOLA	6.58251	6.5568	6.4265	6.58352	6.34299	6.58673	6.64358	6.74287	6.44263	6.62902	6.71192	6.70395	6.4978	6.38734	6.47829	6.81086	6.62881	6.76209
RAPGEF4	5.44198	5.37562	5.83257	5.51205	5.8573	5.65806	5.76958	5.88929	5.39573	5.20872	6.04757	5.73446	5.55671	5.31153	5.54686	6.01928	5.76894	5.86924
RFK	6.2976	6.36195	6.35869	6.67197	6.21748	6.43899	6.54859	6.79998	6.36962	6.77216	6.80739	6.74825	6.52931	6.39293	6.36667	6.91866	6.72291	6.22176
RPL35A	6.44354	6.76098	6.60769	6.48188	6.56769	6.4994	6.51313	6.5598	6.87758	6.59369	6.43691	6.80292	6.84904	6.86324	6.52285	NA	6.63703	6.82918
SLC9B2	4.24016	4.03833	5.16014	3.97997	4.24075	4.65095	4.35323	4.89461	4.46692	4.4684	4.58609	3.9712	4.49224	4.8074	4.19284	4.07325	4.74139	5.465
UBA6	4.9763	4.95565	5.09044	5.0397	4.99793	5.15912	5.05895	5.04465	5.09533	4.97255	5.21702	4.98566	5.00415	4.90012	5.24868	4.97152	4.93038	5.33245
GLRX2	7.0422	7.03639	7.2421	6.76121	7.34159	7.16147	7.04525	7.42646	7.45027	7.18168	7.10831	7.27373	6.98472	7.30055	7.41083	6.99894	7.00415	7.41143
SGMS1	3.265	3.86036	3.38593	4.29013	3.6363	3.95054	3.98461	3.8271	3.79737	3.56598	3.9124	3.72924	3.87331	3.67199	3.39797	3.88896	3.91052	4.05518
ACSBG1	2.76365	2.1483	2.60173	3.01159	2.12272	2.83893	2.9178	3.45605	2.20135	3.25442	2.32257	4.05888	3.49024	1.73369	3.39485	4.04492	2.28522	3.18617
C2H6orf62	7.85113	8.22252	7.97606	8.22258	8.01411	8.25462	7.90035	7.9609	8.08046	8.44901	8.15426	8.24571	8.33205	8.05107	8.02295	8.14857	7.97514	8.42695
IFIH1	1.08221	0.794932	0.9936	1.23665	0.69229	1.61999	0.798951	1.78431	0.548858	1.423	0.880511	1.55374	1.08763	1.13231	1.19241	1.19275	1.84002	1.17256
LOC105759308	3.61526	2.84523	3.50842	3.77598	3.27933	3.88231	3.58377	4.19085	3.29567	3.62193	3.8386	3.37574	3.76144	3.5736	3.03418	3.36182	3.81861	3.9365
MLLT10	4.94159	4.96261	5.31851	5.2695	5.06633	5.11827	5.14766	NA	4.97133	5.11695	5.20883	5.35105	4.81556	4.92291	5.20082	5.36028	5.07885	5.50034
ZMPSTE24	5.45207	5.48199	5.52031	5.74191	5.57429	5.80586	5.67258	5.7594	5.50319	5.58948	5.76765	5.70038	5.56112	5.66511	5.43628	5.70401	5.62428	5.55101
CAND1	6.30968	6.12261	6.09891	6.19577	6.11448	6.29158	6.25643	6.11867	6.07054	6.14414	6.16392	6.1751	6.17679	6.14324	6.18674	6.30531	6.26846	6.49841
FABP5	6.71805	6.69635	6.24919	6.72881	6.2626	6.84952	6.57888	6.63086	6.36654	6.89524	6.97883	6.6633	6.70841	6.47377	6.57005	6.74608	6.87781	7.01198
HNRNPK	7.72889	7.69537	7.58857	7.76243	7.61997	7.79846	7.8681	7.84013	7.6315	7.75129	7.80819	7.85242	7.68394	7.74269	7.674	7.7239	7.8122	NA
NDUFAF2	4.94392	4.91236	5.05769	5.15899	5.0188	5.17389	5.25812	5.39078	5.28123	4.78892	5.35128	5.26765	5.21645	5.07896	5.13545	5.3659	5.11623	4.85801
OGFOD1	5.30303	4.99349	4.943	4.84612	5.29763	5.27709	5.0133	4.94445	5.31821	5.30481	5.23578	5.12912	5.17418	5.29427	5.28448	5.00493	5.05795	5.40335
RIN3	1.23311	0.99139	1.47514	0.99083	1.36044	1.46269	1.26946	2.03967	2.44841	0.676505	1.57167	1.06322	2.20566	1.09472	1.03913	1.23129	1.38679	2.3045
TBC1D12	6.32389	6.15204	6.07974	6.31454	5.93876	6.11547	6.49896	6.21113	6.08796	6.32687	6.44372	6.46109	6.39839	6.18061	6.05195	6.48939	6.31508	6.40219
TBC1D14	5.63572	6.15421	6.12374	6.24552	6.03764	6.23488	6.26337	6.61469	5.88997	6.01586	6.46602	6.25569	5.96701	5.73356	5.91582	6.20595	6.19591	6.54321
GGH	5.74167	6.21123	5.83093	6.30639	5.93459	6.19299	6.15603	6.23255	5.90712	6.1768	6.41664	6.22479	5.80313	6.1616	5.59087	6.29804	6.2286	6.50392
LOC105758648	6.45051	6.69108	7.01412	6.78239	6.72126	7.38355	6.98906	7.86573	6.93026	6.48465	7.22572	6.58061	7.09076	6.71559	6.67716	6.68881	6.71713	7.7397
LOC105758955	3.2063	3.51384	3.23017	3.57692	3.5349	3.53932	3.17886	3.43326	3.46085	3.50357	3.49728	3.35839	3.4318	3.39633	3.32237	3.295	3.5035	3.8678
SDCCAG3	4.97915	4.99557	5.19763	NA	5.04095	5.37399	5.09347	5.17293	5.12316	NA	5.21871	4.95302	5.57927	5.25839	5.31031	5.05619	5.26646	4.99663
SMNDC1	5.59669	5.50378	5.28709	5.46829	5.39718	5.56816	5.41974	5.68419	5.44985	5.5861	5.52265	5.46682	5.62999	5.60338	5.44318	5.52004	5.44664	5.79013
UBE2K	6.94527	6.97222	6.80971	6.93836	6.73098	6.95635	6.92181	7.12878	6.79711	6.94028	6.96075	6.97656	6.99074	6.84097	6.91826	7.12512	6.9209	7.15713
AMD1	8.2527	7.90264	8.05438	8.0901	7.95431	8.18995	8.22864	8.30048	7.95735	8.02123	8.11616	8.29982	8.00024	8.17167	8.08983	8.20139	8.1567	8.25733
ANKS1B	5.88205	6.09057	6.21287	6.4171	6.32406	6.26971	6.37669	6.63706	5.84297	6.17602	6.49931	6.27279	5.88213	5.87618	6.14332	6.61674	6.54673	6.40889
CLCN2	4.80213	4.19177	4.21915	4.3671	4.28679	4.41727	4.2041	4.62092	4.83688	4.64901	4.13172	4.62047	4.68526	4.77119	4.31394	4.59959	4.40051	4.9869
CMTM7	1.17712	1.60801	1.5152	2.29798	1.95718	2.17491	1.5749	1.57778	1.47611	2.22228	2.17063	2.38404	2.19304	1.44722	1.40491	2.17141	1.30323	2.16487
HSPA13	4.25211	3.58875	3.5556	3.67827	3.88574	4.31335	4.39728	4.64441	3.82089	4.46523	3.86019	3.85647	4.17787	4.02679	3.62043	4.14293	3.68127	4.70809
ING5	5.9556	5.60507	5.70987	5.68368	5.38585	5.80152	5.8512	5.81359	5.62043	5.72257	5.73508	5.67432	5.7736	5.97155	5.56668	5.90204	5.82321	6.25693
LOC100218932	1.4458	1.22711	1.60598	1.35801	1.42663	1.70207	1.45618	2.19513	1.23842	1.61814	1.71296	1.77053	1.25688	1.36762	1.71804	1.67686	1.42639	1.69199
LOC100219413	0.879854	1.31324	1.71141	0.912503	0.401614	2.01122	1.78758	2.28468	1.50316	0.594111	1.09168	1.36134	1.28366	1.73562	1.13806	1.28309	1.50763	2.30687
LOC100231283	1.75302	1.79498	2.31554	1.76017	1.98594	2.39957	2.44112	2.70749	2.21935	1.84919	1.63719	1.72682	2.21722	2.21331	1.6815	1.46985	2.84967	2.93771
LOC101233208	5.54925	5.02157	6.88863	4.7258	5.2074	6.56352	6.53443	6.87525	6.86647	6.10879	6.36176	5.89962	6.92822	6.47779	5.84533	4.33363	6.6896	6.38642
MCUR1	5.48936	5.68053	5.30483	5.62768	5.3212	5.56675	5.46044	5.77704	5.56802	5.62342	5.72879	5.86913	5.68729	5.33104	5.41715	5.61901	5.53038	5.98993
SEPSECS	2.27636	2.27721	1.64135	2.30412	2.4636	2.52555	2.68773	2.66457	2.47538	2.32988	2.46138	2.17212	2.62624	1.98738	2.32227	2.32736	2.0955	2.6952
CMAS	5.37804	4.99985	5.44502	5.09302	5.28003	5.50494	5.17105	5.27557	5.10839	5.14522	5.48465	5.55874	5.0999	4.88716	5.61065	5.42594	5.27063	5.78352
EIF4E	7.13853	7.07572	NA	7.05069	6.90236	7.29381	7.30505	7.34089	7.11715	7.10693	7.19666	7.28621	7.22212	7.28001	6.90945	7.14862	7.14657	7.33403
GPX1	6.37484	6.88113	6.3561	6.47863	7.1983	6.70701	6.56305	5.91222	6.85098	6.91161	6.45926	6.89723	6.53574	7.02724	7.19897	6.85357	6.58485	7.1087
SULF2	4.62084	4.58148	4.98336	4.73632	4.84902	5.09534	4.61791	4.72392	4.75414	4.68082	5.06629	4.73542	NA	4.52335	4.89205	4.93762	4.91648	NA
TMEM208	6.27418	6.2596	6.41661	6.30834	6.34369	6.46164	6.13482	6.57269	6.43375	6.37346	6.18027	6.47832	6.49721	6.61745	6.36453	6.11975	6.23185	6.82353
LOC100223922	1.48078	1.89842	2.64741	2.56379	2.40153	1.65772	2.33124	2.02267	2.11605	2.21716	2.3787	2.45025	1.39814	1.90103	2.5541	2.15181	2.7248	2.69594
N4BP2	3.77364	3.52921	4.09104	3.83038	3.47632	3.68339	3.95041	3.95975	3.80184	3.6129	3.90377	3.66249	3.83605	3.52836	3.91402	4.02541	3.93285	4.1032
PNO1	4.77418	4.86099	4.56025	4.38673	5.37145	4.92585	4.82388	4.73607	5.2021	5.04843	4.69781	5.19115	4.8071	5.43622	4.72155	4.85541	4.81428	5.08522
POLDIP3	5.20676	5.26622	5.3285	5.23526	5.38862	5.33454	5.30325	5.17425	5.36434	5.3509	5.33098	5.34947	5.34958	5.38904	5.48922	5.14058	5.30621	NA
RPS6KC1	4.82216	4.50599	5.21168	4.77056	4.92762	4.9247	4.97369	5.21649	4.77013	4.60526	4.98957	5.06032	4.74345	4.76905	4.83471	5.00071	4.99172	5.10371
SLC38A2	6.95851	7.21141	6.91101	7.28267	6.70375	7.21838	7.28343	7.40326	7.09677	7.27571	7.26037	7.48316	7.25468	7.01719	6.75235	7.39464	7.31784	7.28445
TNFAIP6	2.0376	0.411705	1.84634	1.16022	1.67833	1.67358	1.66729	2.15196	0.149285	3.31911	2.57795	2.46145	2.23659	1.93941	1.60049	1.47484	1.58145	2.19391
TTC7B	6.69315	6.55086	7.05757	6.6692	6.37937	6.61794	6.61011	7.17343	6.77931	6.70258	6.63214	6.80837	7.34523	6.3815	7.00157	6.51632	6.91382	7.42816
UCHL5	5.78144	5.50664	5.73449	5.6757	5.45892	5.73142	5.97173	5.73899	5.75035	5.42856	5.87157	6.08888	5.50119	5.39878	5.83027	5.85806	5.73721	6.09801
ZNHIT3	3.71639	3.90026	3.33824	3.45811	3.62306	4.09822	3.90933	4.14304	4.1241	3.87645	3.33403	4.3924	3.84695	4.30705	3.53811	3.55354	3.97025	4.12415
DYRK2	5.20842	5.02226	5.76661	4.94094	5.0538	5.44042	5.39497	5.38017	5.2292	5.20221	5.40309	5.17927	5.47867	5.04987	5.31335	5.16241	5.3169	5.91522
ERI1	4.27031	3.63511	4.7649	4.01369	4.36976	4.16174	4.22322	4.57159	4.30372	4.03198	4.4521	4.26446	4.16274	4.19094	4.26952	4.10434	4.37347	4.66767
FGF9	5.54556	4.52206	5.30793	4.88041	5.24469	5.3216	5.16476	5.70621	5.39296	5.1123	5.08703	5.46855	5.18048	4.83988	5.54844	5.52808	5.12098	5.43938
IRS1	3.08782	2.90457	3.29504	3.32503	3.41614	3.15422	3.25928	3.39222	2.99737	NA	3.15117	3.02337	3.03007	3.06175	3.16981	3.19493	3.40262	3.55187
LOC100220775	4.56789	5.16641	5.05697	5.24397	5.16038	5.13653	5.20496	5.51112	4.80148	5.00417	5.45358	5.06728	5.06095	4.9212	4.71605	5.29824	5.43437	5.27419
LOC100230788	4.00652	4.63347	4.07034	4.06762	4.6638	4.35002	3.98067	4.31776	5.10807	4.74231	4.32808	4.12084	4.87164	4.65724	4.42099	4.32452	4.71192	4.45431
LOC105760199	5.78783	5.01012	5.44229	6.0505	5.09511	5.85204	5.54397	5.5995	5.8644	5.43044	5.73468	5.54075	5.57403	5.24223	5.717	5.94792	5.97296	NA
STOX2	4.59776	4.70292	5.09465	4.73893	4.7043	4.83461	4.97841	4.87569	4.76065	4.57646	4.83017	4.74182	4.6104	4.62183	4.74687	4.86419	5.03771	5.23988
TMEM260	4.64236	4.54083	4.55032	4.27601	4.3804	4.65133	4.45537	4.35044	4.68792	5.02812	4.36018	4.83993	5.01553	4.77615	4.49792	4.34146	4.53048	5.19951
CASD1	5.9466	6.44402	6.35191	6.76241	6.28731	6.64851	6.63471	6.73726	6.00624	6.43593	6.60501	6.48964	6.36765	6.18959	6.24278	6.46391	6.46589	6.85389
DPH2	4.54553	5.08493	4.78835	4.78733	5.15861	4.93957	4.83157	4.87359	5.15434	5.33765	4.51015	4.59449	5.08733	5.23996	5.07469	4.72623	4.94157	5.42518
G2E3	4.38921	4.81647	4.35137	4.966	3.97343	4.80958	4.89175	4.83987	4.52105	4.90525	4.9663	4.82292	4.79388	4.65083	4.19601	4.97241	4.66329	5.11602
LOC100217846	4.78924	4.64758	4.84788	4.91705	4.4798	4.72759	4.74454	4.92671	4.81997	4.62388	4.94541	5.13616	5.01739	4.48588	4.72118	5.08508	4.7719	5.08162
LOC101234013	3.49993	4.50492	3.60651	4.80407	3.82909	4.56698	4.68882	4.70668	3.74516	4.50823	4.72149	5.00484	4.57285	4.4774	3.29168	4.38523	4.46819	4.60091
LPAR4	4.90777	4.15458	4.39036	4.17194	4.65721	4.29155	4.51107	4.21858	4.60799	4.06462	4.62896	4.42686	4.32249	4.9611	4.99449	4.847	4.71973	4.76022
RAP1GDS1	7.73548	7.6506	7.94848	7.6257	7.87698	7.97709	7.8886	7.84448	8.0136	7.79785	7.864	7.51685	7.91353	7.84513	7.78994	7.70568	7.70683	8.21711
L3HYPDH	1.25021	1.1198	1.26275	1.02987	1.69584	1.43881	1.24444	2.19316	1.96401	2.22113	0.859823	1.45937	1.2462	1.32614	1.14763	1.25872	1.88353	1.85408
LOC105759171	5.26114	4.66114	5.25769	4.97159	5.23054	5.38773	5.32553	5.53859	4.85558	5.2305	5.28233	4.9091	5.24647	4.93536	5.11313	5.20957	5.08295	5.5723
LOC105759267	3.81462	3.9085	3.87462	4.39771	3.47185	4.38673	4.05295	4.87288	4.08582	4.33553	3.95389	4.28525	3.61761	3.94379	3.86182	4.51944	3.92428	4.66665
LOC105760122	8.41392	8.30364	8.7625	8.79494	8.52908	9.12893	9.00818	9.5874	8.73241	8.51845	8.94542	9.02035	8.68795	8.83293	8.11084	8.86563	9.00489	8.69108
LOC105760705	2.65046	2.63769	3.0793	3.39571	3.47017	2.72583	3.08522	4.41166	3.29132	2.67712	3.43166	4.57024	3.37748	2.32403	3.17577	3.38726	3.28834	3.31205
PLEKHF2	3.33028	3.24274	3.87129	3.64228	3.49652	3.65757	3.66544	3.27697	3.53102	2.94558	3.66402	3.37289	3.40863	3.56674	4.15151	3.57564	3.61713	3.91194
SNAP25	10.1253	10.1154	10.1694	10.3795	10.1119	10.0922	10.3968	10.5644	9.94771	10.1839	10.4182	10.5728	9.88891	10.0827	10.0609	10.5181	10.6116	10.4444
TNPO3	5.02742	4.94651	5.14263	5.15719	5.25041	5.0816	5.204	4.71146	5.30499	5.18215	5.1707	4.96748	5.52674	5.44483	4.90117	5.19707	4.94058	5.51156
UBXN10	0.904197	1.77257	2.13919	1.83942	1.96732	2.14401	2.07804	1.54861	2.22146	2.42252	1.87597	1.23987	2.19712	2.6787	1.56209	1.33724	2.65029	1.86259
USP44	4.20384	4.08703	4.07368	4.24046	3.81101	4.20186	4.13604	4.62319	3.95069	3.91955	4.20157	4.40769	4.21358	3.62874	4.29888	4.64959	4.42517	4.58772
CCDC40	2.61498	2.56787	3.22649	2.57167	2.75055	3.32953	3.04199	3.43771	2.8	3.07592	3.3009	3.05401	2.79707	2.77807	3.67939	3.02853	2.36869	3.00017
DOCK11	3.87291	4.06249	4.66944	4.04574	4.54456	4.41597	4.45165	4.84971	4.5679	3.83878	4.38192	4.3257	4.23194	4.27368	4.31778	3.9849	4.4673	4.64467
GLCE	3.77515	4.43289	4.21066	4.46084	4.39808	4.1347	4.29118	4.17308	4.20008	4.75882	4.2566	4.31304	4.32778	4.4599	3.92495	3.97659	4.50055	4.90804
MDFIC	3.36727	3.70849	3.48822	3.85932	3.59426	3.68154	3.69155	3.62038	3.53143	3.59195	3.65141	3.31055	3.76226	3.91497	3.22464	3.80711	3.8478	4.04766
NFKB2	3.9268	4.31539	4.08989	4.21455	4.24314	4.38256	4.25057	4.22085	4.58588	4.18784	4.17381	4.16432	4.25267	4.5871	3.97138	4.15621	4.13574	4.51285
PDCD6IP	6.73272	6.44767	6.59029	6.73564	6.3028	6.81388	6.71093	6.91042	6.53646	6.61335	6.71335	6.71206	6.74179	6.47934	6.56665	6.94794	6.66766	6.81096
RPS12	8.77219	9.08614	8.77124	8.92763	8.85555	8.88662	9.0379	8.90407	9.04514	9.05516	8.90544	9.01814	9.08141	9.24939	8.74841	9.12461	8.72123	9.1895
SYNPO2	2.28148	1.53978	1.91262	1.41384	1.66046	1.96124	1.66786	1.80207	1.79355	1.6792	1.96029	1.67864	1.8206	1.82059	1.93772	2.30905	1.8893	2.52913
ARV1	3.70444	4.04912	3.47814	3.84665	3.70313	3.82582	3.83647	4.26247	3.83358	4.18018	3.8905	4.17144	3.6838	3.94665	3.71512	3.89815	4.03865	4.02648
BRD8	5.21675	4.8779	5.39622	5.08509	5.28675	5.11867	5.02049	5.18183	5.02026	5.12211	5.17807	5.07754	5.10788	5.16867	5.34996	5.16475	5.13931	5.60222
CFAP97	7.37419	7.20119	7.23527	7.62925	7.20068	7.22346	7.40316	7.64604	7.05742	7.18612	7.47062	7.72254	7.20037	7.26059	7.27802	7.78527	7.41474	7.70655
LOC100229898	5.76081	5.95384	5.95342	6.24738	5.99318	6.16463	6.18115	5.98938	6.59955	6.27288	NA	5.97499	6.36018	6.56791	6.06543	6.07508	5.95565	5.89518
MCM8	3.45805	3.32943	3.29758	2.71612	2.94603	3.19512	3.49296	2.88689	2.3792	3.36054	2.73349	3.5496	3.04411	3.25876	4.17094	3.99266	3.904	3.99082
SCD5	9.0103	9.02003	9.43075	9.15199	8.95014	9.03415	9.14629	9.3121	8.91816	9.15297	9.28287	8.92919	9.21911	9.30731	9.03557	9.12843	9.31532	9.50525
AMIGO2	6.03595	6.32934	6.73413	6.40738	6.84876	6.69233	6.37533	6.6444	6.47714	6.20675	6.60309	6.44626	6.25559	5.78957	6.83148	6.44994	6.65861	7.12057
CA7	3.4234	3.52215	4.09045	3.74495	3.93101	3.88032	3.51459	4.22285	3.44857	3.48778	4.06569	3.77138	3.45975	2.98773	4.02588	3.80827	4.19024	4.56931
LOC100222286	5.98587	6.21079	6.29006	6.51825	6.63153	6.4961	6.33459	6.40308	6.69107	6.56875	6.38419	6.16017	6.48409	6.60578	6.10579	5.88301	6.45821	6.75191
LOC100225213	3.82673	3.89262	4.42042	3.66247	4.29546	3.75549	3.95959	4.33015	4.56302	3.97991	4.34028	3.96777	3.9146	4.04147	4.04231	3.86948	4.36784	4.45395
MID1IP1	6.92019	7.27501	7.20699	7.06848	7.38712	7.29619	7.15357	7.41467	7.59144	6.89027	7.15741	7.43012	7.2746	7.06996	7.0499	7.21357	7.18245	7.62029
NCKAP1	7.41046	7.204	7.04734	7.58535	7.04852	7.34429	7.55307	7.5427	7.21457	7.28816	7.39892	7.35309	7.25835	7.30605	7.22307	7.72614	7.42902	7.49911
NME7	4.39204	4.58854	4.86608	4.26621	4.79369	4.46567	4.52039	5.01023	4.59665	4.73034	4.61137	4.65449	4.62364	4.80706	4.93639	4.36385	4.45859	5.09432
RAC1	9.20591	9.09401	9.09746	9.36089	9.13553	9.12503	9.50143	9.2768	9.10961	9.30164	9.37029	9.45814	8.96249	9.14225	9.21451	9.53553	9.29806	NA
SNCA	7.46833	7.72341	7.49123	8.23483	8.005	7.68927	7.78451	8.09603	7.33905	7.73528	8.3681	8.04813	7.44671	7.52649	7.63347	7.93156	8.32452	8.11691
CPT2	4.43968	4.45055	4.6212	4.39085	4.12375	4.62539	4.45492	4.85477	4.34514	4.07458	4.73707	4.64062	4.52625	4.51098	4.27494	4.59139	4.61033	5.03949
FAM195B	8.20585	8.50546	8.31812	8.29917	8.61748	8.44603	8.41534	8.26749	8.53359	8.62923	8.39223	8.33624	8.57474	8.63274	8.4727	8.05611	8.41891	8.81131
ID2	5.89538	5.92626	6.42247	5.89278	6.11092	6.16107	6.08751	6.23548	6.28134	6.05604	6.11735	5.94121	6.00569	6.34202	6.02828	6.19744	6.16434	NA
KIAA0368	6.19714	6.08877	6.1266	6.35647	6.11592	6.2626	6.29465	6.38079	6.16384	6.18694	6.29609	6.38764	6.22846	6.11669	6.01696	6.44734	6.29333	NA
MOSPD2	5.21367	5.14728	5.18233	5.41593	4.84716	5.4132	5.41935	5.71486	4.96859	5.0355	5.50092	5.77259	5.09165	4.95773	5.1872	5.71988	5.37463	5.60549
PTPDC1	5.31868	5.9205	6.21018	5.84921	6.2123	6.30444	6.25489	6.92604	6.10274	6.19598	6.4019	5.84725	5.67292	5.7136	5.42944	6.01446	6.26421	6.62282
PUS7	3.75646	3.27346	3.68687	3.436	3.4901	4.09238	3.58224	4.06009	3.62213	3.19818	3.62364	3.84642	3.34617	3.42022	3.9133	3.84166	3.70799	3.97106
RPAIN	5.41191	5.34039	5.35228	4.85244	5.48982	5.25356	5.47921	5.92872	5.86751	5.68684	5.57995	5.61954	5.50294	5.68627	5.53503	5.08958	5.5619	5.46651
RPL34	8.67797	9.02301	8.65316	8.80621	8.93228	8.62048	8.7039	8.8092	8.80552	9.01038	8.90798	8.96726	8.84903	9.09678	8.56299	8.86917	9.02795	9.13984
SLC25A16	NA	5.39948	5.48449	5.49789	5.1499	5.42919	5.36725	5.57381	5.34181	5.26154	5.43818	5.56614	5.49883	5.20445	5.48884	5.39499	5.54283	5.84603
CNNM2	3.93085	3.81681	NA	3.6383	4.0749	3.75591	3.88795	3.94511	3.90195	3.94567	3.91071	3.73575	3.70051	3.70961	4.07218	3.98422	4.05118	4.18017
COG4	5.45826	5.66856	6.15759	5.55968	6.04361	5.75736	5.5833	5.55549	5.99684	5.92503	5.98352	5.67835	5.76452	5.78712	5.99375	5.52981	5.78497	6.21997
DNAJA2	7.26571	7.07045	7.02926	7.20605	6.89147	7.23026	7.15881	7.2539	7.06435	7.22253	7.36918	7.24183	7.20109	7.03321	7.09164	7.21941	7.13989	7.43766
NKX2-1	4.56728	4.23159	4.56587	4.43731	4.83325	4.49687	4.58836	4.27779	4.73544	4.29268	4.45174	4.56055	4.53714	4.3536	4.74319	4.46893	4.63051	4.81255
PACSIN2	7.92987	7.73796	7.82458	8.09721	7.69085	8.21068	8.08977	8.72472	7.824	8.06881	8.31734	8.34526	7.86142	7.63599	7.61387	8.37364	8.08279	8.26493
TBCK	4.62639	4.34901	4.93246	4.4858	4.84518	4.35834	4.35892	4.5844	4.38561	4.76806	4.70114	4.67675	4.47228	4.82873	4.91267	4.56267	4.7585	5.02385
TXNL4B	4.282	4.51777	4.9674	4.06481	4.50253	4.77854	4.27523	4.22546	4.85519	4.83877	4.10393	4.62392	4.78222	4.54349	4.38054	4.45989	4.69201	5.38861
GID8	5.81144	5.97486	5.93956	5.88095	5.76808	6.11487	6.29285	5.88555	5.81767	5.66879	6.18283	6.3333	6.03173	5.9411	5.99877	6.16236	6.18024	5.85028
IPMK	6.05955	5.86171	5.49266	6.04473	5.58192	6.04511	6.18058	5.69386	5.92156	6.15275	6.23833	5.84448	5.84597	6.08064	5.80372	6.07871	5.94278	6.19995
LAMTOR2	7.57951	7.82805	7.73791	7.53457	7.68312	7.85874	7.92398	7.49863	7.83541	7.99779	7.71359	7.70244	8.04961	8.10118	7.63566	7.62743	7.82644	7.87367
NRDE2	3.17363	3.50501	4.02803	3.87527	3.58795	3.48058	3.54072	3.90589	3.55555	3.39028	3.76445	3.62838	3.79396	3.42273	3.50676	3.57289	3.74842	4.17823
TAT	3.34866	3.54385	3.34715	3.27143	3.24333	3.90814	3.5351	3.75965	3.64654	3.70459	3.18337	3.72408	3.89643	3.64719	3.2167	3.22371	3.43745	4.00709
TMPPE	3.34267	3.4333	3.43041	3.33785	3.12045	3.69219	3.62858	3.70209	3.34439	3.72758	3.6123	3.58956	3.93389	3.36901	2.8863	3.44507	3.67181	3.83464
UBQLN1	6.06768	5.79375	5.78625	5.97839	5.81954	6.20414	6.21173	6.20569	6.00926	6.03399	6.12028	6.23656	5.93116	5.9646	5.70224	6.2816	5.95005	NA
UGGT2	2.06267	2.50767	2.39267	2.42468	2.44538	2.74876	2.58513	2.77834	2.59693	1.96451	2.80377	2.25814	2.44065	2.13836	2.24121	2.52255	2.43293	3.05243
ZNHIT6	3.59514	3.90752	3.35658	3.70628	3.23944	3.89124	3.57951	3.99118	3.77864	4.29178	3.70349	3.8747	4.26064	3.86358	3.58065	3.96015	3.35001	4.15248
DEPDC4	2.86693	3.13064	3.17559	3.04389	2.91737	3.62782	3.01573	NA	2.58262	3.1328	3.17693	3.09926	3.00589	2.53059	2.92596	3.29753	3.39804	4.17313
HTATIP2	4.05245	2.31332	2.8648	2.89335	4.4852	4.58187	2.84622	6.09331	4.2302	4.2747	3.12692	2.20342	5.18166	4.24658	3.08489	4.27818	5.03585	3.62512
IPO7	6.23795	6.16666	5.82097	6.15738	5.95459	6.30271	6.36566	5.99735	6.09664	6.29795	6.27746	6.29904	5.98921	6.31131	6.06422	6.36973	6.11975	6.3586
NDFIP1	8.14999	8.33779	8.33308	8.22961	8.38373	8.33808	8.16612	8.38579	8.20217	8.46952	8.23053	8.08488	8.28969	8.43808	8.35791	8.16267	8.50422	8.57387
TEF	6.86545	6.85312	7.09803	6.98893	6.82218	7.01582	7.05857	7.08922	6.69633	7.05148	7.07301	7.11078	6.88536	6.6823	6.8163	7.10724	7.11484	7.29891
CACYBP	NA	8.25405	8.25731	8.3315	8.28925	8.31159	8.44078	8.50797	8.32026	8.1675	8.09675	8.61475	8.27369	8.00336	8.64629	8.49801	8.24959	8.63568
FNDC4	6.4208	6.75582	6.73256	6.64725	6.80472	6.46054	6.48951	6.71316	6.88576	6.87355	6.63663	6.8142	6.70971	6.66929	6.60605	6.66923	6.65233	6.96787
HLCS	2.31159	3.09099	2.65436	3.00753	2.65198	2.17194	2.60735	2.83316	3.25644	3.46773	2.46266	2.89725	2.77182	3.27548	2.74543	2.88435	2.86454	3.41058
LOC100228251	2.52836	2.76354	2.82465	3.04935	2.61771	3.84848	2.9718	4.02469	2.26656	2.96679	3.57514	2.80619	2.54282	2.58775	2.27864	3.37445	3.43599	3.75563
LRPPRC	6.43563	6.08486	6.19889	6.17449	6.07266	6.4919	6.43465	6.23479	6.28335	6.10068	6.34067	6.24048	6.28252	6.2116	6.25241	6.33943	6.24498	6.54876
NOVA1	7.54172	7.52483	7.63802	7.85542	7.58057	7.61306	7.72418	7.79662	7.4923	7.61416	7.75729	7.69666	7.49711	7.37589	7.62028	7.79018	7.7235	7.92681
RRP8	4.96006	5.59671	5.15581	5.22826	5.92481	5.27124	5.38487	5.1444	5.72328	5.72689	5.49192	5.48015	5.64713	5.59626	5.21337	5.21302	5.39658	5.68246
TNK2	7.92597	7.93613	8.06726	7.72168	7.92007	7.71555	7.87371	7.78493	8.25612	8.08487	7.78368	7.90857	8.02334	7.69497	8.29337	7.88305	8.13921	8.43271
USP13	2.09209	1.80069	2.17547	2.12973	2.4303	2.14401	2.13211	2.49851	2.24491	1.8416	2.21538	1.79575	2.28008	2.09117	1.94836	1.86982	2.38278	2.75194
UVRAG	4.24537	4.24208	4.26121	4.20996	3.96209	4.18768	4.31777	4.56228	4.24195	3.84035	4.21778	4.25736	4.29106	4.20518	4.43212	4.20689	4.28885	4.81128
ABCC9	2.63286	2.59556	2.91624	2.62407	2.69402	2.71228	2.64645	NA	2.77537	2.74541	2.78996	2.58788	2.80331	3.0496	2.84483	2.61894	2.53799	2.97882
AP3S2	NA	7.21927	7.35397	7.00189	7.22389	7.28598	7.37288	7.22247	7.55574	7.38478	7.14883	7.14621	7.41534	7.38576	7.00704	6.93644	7.51563	7.90763
C10H15orf27	4.90917	5.10488	5.20522	5.03539	5.16902	4.99957	5.12604	5.06321	5.50423	4.95021	5.26295	4.99989	5.21767	5.5135	5.00866	5.0734	5.30799	5.16426
LOC100219752	3.32729	2.38686	2.62331	2.61657	2.93682	2.72253	2.79537	2.75915	2.84407	2.39221	3.02699	3.3434	2.58344	2.75226	2.71268	3.23265	3.17478	3.2803
LOC105760749	0.764873	1.23672	3.83214	0.767231	2.92017	3.10682	3.04923	4.58302	3.87872	0.137343	3.1241	3.70955	4.47158	3.17585	0.0154909	0.739255	4.09617	3.40032
OSGIN1	2.96535	2.57015	2.84334	2.34536	2.87975	2.98102	3.28194	3.0301	2.909	3.06922	NA	2.81202	3.14204	2.89571	2.7143	2.5024	2.7756	3.28169
PDE8A	3.01198	2.52703	2.66612	2.80319	2.85845	2.88367	3.13159	3.06347	2.62429	2.69489	2.96639	3.01465	2.67498	3.35187	2.51467	3.40349	2.94547	2.90067
PTTG1IP	5.2627	4.96989	5.18763	4.88844	5.32381	4.91116	5.15643	5.48201	5.86029	5.03651	5.23701	5.22302	5.71151	4.93854	5.52678	5.12811	5.07008	5.53937
RMND5A	8.37995	8.31842	8.17936	8.48086	8.09208	8.43596	8.44615	8.06871	8.18931	8.14231	8.35655	8.4738	8.30227	8.1381	8.38552	8.71569	8.42463	8.71975
SAG	2.38668	2.76897	2.94775	2.6849	2.40442	2.70464	2.8399	NA	2.7974	2.65439	1.98731	3.234	3.16425	2.95819	2.77785	2.321	2.8588	3.52773
TRABD	6.07143	4.77055	5.39659	4.78523	5.48185	5.84588	5.5511	6.57464	5.24653	5.62136	5.0917	6.04967	5.40025	5.35616	5.40125	6.01823	5.47312	6.15668
TTC38	4.11623	3.76553	NA	3.58829	4.26761	4.0527	4.55934	4.7612	4.45514	4.01081	3.91206	3.94281	4.75174	4.33602	4.47346	3.92576	3.72764	4.3876
WARS	6.16949	6.07319	6.17656	6.16733	5.85682	6.24368	6.31835	6.36062	6.27042	6.37045	6.30502	6.33881	6.23579	6.02515	6.05278	6.53744	5.96335	6.38868
BORA	2.36379	2.50715	2.67799	2.58898	2.40667	2.69104	2.5719	2.43332	2.56514	2.83027	2.90059	3.01647	2.48107	1.92878	2.6933	3.13053	2.15878	3.28111
GABARAPL2	8.2403	8.2935	8.28806	8.27501	8.31196	8.31871	8.33352	8.54483	8.27475	8.2696	8.46199	8.32793	8.09693	8.15915	8.40372	8.32472	8.34359	8.55005
LOC100227847	3.52186	2.6926	3.18148	2.88824	2.79583	3.73182	3.67392	3.04058	3.93735	3.26076	3.58291	3.91929	3.53506	3.52673	2.64323	3.56106	3.11683	3.3785
NUDT19	4.52994	4.86058	4.15949	5.40875	4.61204	4.51329	4.78627	4.73761	4.46998	4.81863	5.10002	4.98756	5.0391	4.59192	4.56236	5.20668	4.68723	5.19494
PHEX	1.1619	0.904109	1.6332	0.888385	0.772121	1.26008	1.76128	1.87766	1.38114	1.43664	1.17542	1.152	1.81239	1.0226	1.38779	0.869092	1.23623	1.81086
RNF25	4.71266	5.14878	4.77445	5.32207	5.18701	5.00978	4.80827	5.1966	5.34707	5.28266	4.86931	4.73217	5.40067	5.41703	5.06414	4.85317	5.01856	5.48451
SHOC2	4.7672	4.60405	4.88702	4.46319	4.55838	4.70855	4.67373	4.69714	4.65624	4.58763	4.6705	4.79782	4.76805	4.51518	4.82206	5.02657	4.68039	4.97545
UGCG	4.88339	5.26392	5.18657	5.45346	5.22522	5.43766	5.25584	5.50205	5.17393	5.61665	5.38548	5.41757	5.43184	5.20373	5.0676	5.62421	5.61015	4.97137
ZC3HAV1L	4.14331	4.42029	4.06043	4.37358	3.99283	4.24534	4.47219	4.59829	4.16049	4.60835	4.20372	4.59339	4.19113	4.40461	3.97499	4.53713	4.26352	4.70186
HINFP	4.43528	4.54866	4.28021	4.31452	4.37508	4.48066	4.25677	NA	4.72982	4.64194	4.28676	4.46498	4.4815	4.53016	4.73716	4.34018	4.68201	4.55717
HMGB1	6.90729	6.92274	6.87337	7.30234	6.76362	7.1654	7.23886	7.30959	6.90284	7.2211	7.3321	7.1688	7.04765	6.73532	6.773	7.07403	7.11653	7.34575
LOC100230826	1.58177	0.541617	1.6954	0.686267	1.01066	1.7456	2.05283	3.04962	1.91009	0.829919	1.92324	1.25658	2.6251	1.28174	1.30682	0.824551	1.3991	2.17676
NUP54	4.88097	4.80503	4.61815	4.85211	4.7462	4.80091	4.81796	4.94907	4.80858	4.95704	4.83981	4.86805	4.7174	4.77967	4.73148	4.88984	4.75153	5.1879
RBM34	5.79618	5.46538	5.05536	5.63786	5.05332	5.86716	5.43446	6.19393	5.75296	5.59338	5.76801	5.68397	5.63672	5.10674	5.66857	5.88789	5.60644	6.00223
SFXN1	6.617	6.56294	6.96837	6.40548	7.00621	6.7139	6.73835	NA	6.53297	6.58283	6.82793	6.77039	6.80547	6.54011	6.78639	6.66317	6.75896	7.07273
ZNF800	2.71253	2.30077	2.40704	2.4198	2.76937	2.64957	2.43468	2.43215	2.34777	2.23667	2.95767	2.50016	2.38937	1.96529	3.07624	3.10028	2.88696	2.83989
GPR180	4.64626	4.4561	4.18257	4.58678	4.337	4.44966	4.62129	4.67167	4.51048	4.77749	4.5017	4.56783	4.69006	4.35969	4.48438	4.4975	4.46572	4.87785
KPNA5	4.82422	5.24296	4.76807	5.51307	4.65942	5.15126	5.15186	5.26376	4.9772	5.4034	5.22377	5.08942	5.50742	5.14644	4.47687	5.45587	5.32792	5.49821
NT5DC4	2.14558	2.68936	2.27151	1.82469	3.0725	2.68784	2.18083	2.49057	2.78869	2.8516	2.51893	2.41437	2.629	3.47318	2.22283	2.27449	2.8542	2.70054
PARS2	NA	4.2542	3.99173	4.15581	4.04725	4.06025	4.13364	3.81551	4.62197	3.96411	4.13384	4.38237	4.30534	4.19981	4.10201	NA	4.00422	4.78517
PPP2R5E	6.17793	6.32326	6.20703	6.32519	5.99418	6.25527	6.36478	6.19876	6.14468	6.35128	6.42186	6.23134	6.32045	6.15469	6.09532	6.41867	6.38051	6.49428
SAMD5	0.776693	0.819936	1.0855	1.88521	1.69006	1.03368	1.92463	1.58953	1.30885	1.53716	0.726713	1.62566	1.23457	0.627342	0.345287	1.62746	1.53671	2.37088
SCAF4	4.81929	4.81159	5.10981	4.81116	5.15442	4.92674	4.80879	4.75614	4.86938	4.96854	4.85961	4.72612	4.90204	4.95006	NA	4.92824	5.02055	5.3252
WDR44	6.18993	6.01291	6.11596	6.234	6.33313	6.26761	6.2481	6.33205	6.2188	6.05753	6.35568	6.41311	6.15534	5.98504	6.05008	6.06422	6.31711	6.46403
ZBTB33	5.60317	5.57133	5.34519	5.58209	5.44706	5.64728	5.69225	5.47532	5.61427	5.67601	5.60279	5.66832	5.82189	5.61023	5.30216	NA	5.57195	5.78461
ZNF821	6.02971	6.04245	5.88502	6.02953	5.78557	6.06441	6.07175	6.37826	6.05273	6.13715	5.84741	6.25312	6.11736	5.99869	6.00147	6.09408	5.92003	6.35339
ADNP2	4.76612	4.69259	4.88389	4.87315	4.55202	4.73841	4.86158	4.83209	4.79553	4.7915	4.97674	4.77827	4.81787	4.71609	4.66228	4.90217	4.66203	5.22917
C11H16orf70	5.55528	5.54958	5.80142	5.65826	5.47137	5.62519	5.4934	5.92116	5.40865	5.69362	5.82222	5.60242	5.59772	5.42981	5.62323	5.86879	5.67025	6.00985
LOC105758906	0.767479	0.496734	2.12433	0.0222987	1.67175	1.46854	2.15827	2.4976	2.08569	1.7899	0.324689	0.893878	2.38619	2.19435	1.40301	0.0156651	1.29728	2.34619
MRPS9	5.38789	5.68829	5.30581	5.83463	5.68189	5.99145	5.83288	5.93213	5.8015	5.77417	5.79917	5.68474	5.57094	5.63846	5.31872	5.35248	5.76737	6.10359
SLC25A5	9.33124	9.50854	8.97988	9.32371	9.48286	9.47371	9.43106	9.4053	9.46374	9.36548	9.23833	9.47755	9.42921	9.77436	9.2745	9.40232	9.32096	9.59447
CHRD	1.66572	1.99383	1.40512	1.42798	2.06178	1.33911	1.94584	1.54535	2.50812	2.4418	1.64748	1.76245	2.53581	2.00616	1.7076	1.95008	1.72279	2.17618
DKK3	5.9855	6.2098	6.11796	5.99451	6.46605	6.01894	6.28664	5.80466	6.48981	6.23389	6.3491	6.14033	5.92096	6.24991	6.26778	6.31841	6.39983	6.24541
KEAP1	2.77112	3.57646	3.10626	3.96871	3.97062	3.43212	3.13523	3.86695	3.51115	3.75229	3.68139	4.28329	3.4848	3.91757	3.07891	3.08522	3.95772	3.643
PHLPP2	5.68711	5.59366	5.46876	5.70287	5.40464	5.60208	5.68382	5.85323	5.61395	5.85541	5.63258	5.54031	5.68358	5.74429	5.44654	5.78696	5.63004	5.89475
PRKD1	3.69505	3.30307	3.17662	3.4468	2.95404	3.54558	3.41182	3.51196	3.24011	3.48017	3.53452	3.67243	3.46586	3.74238	3.31934	3.46832	3.29156	3.96744
TMEM43	3.22263	3.73401	4.57826	4.25	3.31618	4.48947	4.29088	4.6694	3.87674	3.14497	4.41323	3.94106	4.23027	4.087	3.45164	3.555	4.25469	4.99967
UIMC1	4.82936	5.10667	5.48682	4.92591	5.42919	5.37215	5.2438	5.22407	5.21686	4.87202	5.18226	4.98609	5.14729	5.20537	5.62112	5.03707	5.09071	5.54889
ATP5D	8.56362	8.83475	8.55473	8.64379	8.7764	8.67702	8.84107	8.54867	8.70327	8.82387	8.7834	8.89232	8.77663	8.90368	8.67614	8.77338	8.81509	8.62131
CBX3	6.96439	7.15787	7.11961	7.43079	6.96994	7.20543	7.27062	7.79095	6.96451	7.11476	7.50783	7.32025	7.21308	6.87493	7.00296	7.51247	7.26471	7.50372
CFLAR	4.03859	4.21989	4.12569	4.27637	3.89048	4.11155	4.1965	4.15793	4.38717	4.45847	3.8791	4.41847	4.17677	4.21502	4.03946	4.27582	4.27848	4.42085
CTSC	5.25611	5.65239	5.21761	5.90514	5.21252	5.67029	5.41241	6.10951	5.58879	5.81648	5.73026	5.49603	5.67655	5.33874	5.56592	5.44843	5.37719	6.13305
GLRA2	5.21283	4.6568	5.30334	4.70584	5.24956	5.21301	5.09831	4.99823	4.88548	4.81148	5.05628	5.23084	4.91369	4.84812	5.37026	5.45005	5.17342	5.23822
LOC101234221	1.70978	1.37202	0.882219	1.92944	1.88161	1.98257	1.20375	2.00262	1.35774	1.30577	3.42394	3.35545	0.814668	1.0692	1.59742	3.30553	2.17791	1.87757
LOC105758975	2.99811	3.04329	3.73402	3.52404	3.06131	3.51369	3.67442	4.02871	2.50395	2.96068	3.76613	3.0194	2.86121	3.70293	3.53198	3.23978	3.49144	4.37598
METTL10	4.32489	3.96848	5.2603	4.00316	4.35107	4.77623	4.87442	4.97609	4.19577	4.55953	4.54495	4.40769	4.62253	4.40909	4.67541	4.11729	4.6066	5.09829
PRKDC	2.93232	2.65592	2.92811	2.64913	2.62319	2.76443	2.87861	3.05668	2.80555	2.74605	3.08477	2.89395	2.64364	2.66407	2.72691	2.91567	2.90637	3.23589
YPEL5	7.03106	7.51202	7.86861	7.45779	7.36239	7.3652	7.24271	7.72382	7.16556	7.45826	7.68151	7.73584	7.36422	7.44198	7.6051	7.48919	7.42018	7.89108
ABHD12	6.66817	6.86334	6.77416	6.51698	6.77089	6.77877	6.65063	6.78225	6.99842	6.95032	6.69049	6.55892	6.76028	6.9547	6.84798	6.74249	6.67969	7.1602
AKAP7	4.2378	4.56582	4.7714	4.84297	4.75829	4.54306	4.5247	4.96145	4.58239	4.86553	4.65935	5.0142	4.68419	4.26226	4.216	4.73862	4.61304	5.31856
C5H11orf31	5.8424	6.52178	5.77965	5.73211	5.95414	6.58178	5.98718	5.77855	5.87407	5.99311	6.49746	6.49274	6.43528	6.99616	5.88613	5.81375	5.91595	6.91993
CCDC115	4.71091	5.06606	4.80798	NA	5.26852	4.89803	4.77419	4.94691	5.13507	5.23334	4.73251	4.68474	4.97005	5.33785	5.20446	NA	4.90419	5.24808
CEBPZ	5.13566	5.32562	5.19034	5.35522	5.34707	5.56227	5.49279	5.31311	5.46242	5.27065	5.41106	5.36673	5.19656	5.10326	NA	5.41866	5.29856	5.39364
ETAA1	2.47046	3.09931	3.22953	3.26001	3.1862	3.34926	3.20571	3.20255	2.87542	2.99794	3.31908	3.02911	2.74538	2.69113	3.00029	2.97089	3.19936	3.74551
GLTSCR1L	4.3175	4.52863	4.64774	4.8051	4.3126	4.56135	4.54572	4.63586	4.33826	4.4924	4.71264	4.56209	4.48326	4.21674	4.46188	4.69878	4.70549	5.02613
LRRN3	3.92061	4.76691	4.65469	4.9595	4.39881	4.81888	4.70599	4.72359	4.39667	4.54695	5.04271	4.72769	4.47197	4.21454	4.53415	4.71028	4.83465	4.85665
RRM2	1.81108	NA	1.97344	2.54919	1.84293	2.15393	1.85165	1.76009	2.67953	2.03432	1.83363	2.06642	2.89246	2.08888	2.06263	1.97045	1.82044	2.93297
ADGRG3	2.09537	2.20682	2.78098	2.33145	1.46729	2.96555	3.3152	2.8367	2.77481	1.89211	2.24875	2.12228	2.32565	3.37092	2.8371	2.25607	2.84574	2.66156
BDNF	1.41045	1.31703	0.380651	1.22698	1.06704	1.7529	1.4593	0.80893	2.12645	1.43664	1.42091	2.25744	1.21361	2.4708	1.02559	2.09661	1.81099	0.853683
DPP4	4.31954	5.26054	6.24721	5.89115	5.81703	5.98676	6.09498	6.33631	5.1475	5.53969	6.36017	5.54629	5.64172	4.71197	5.42157	5.83683	5.16118	6.35291
LOC100219281	3.69565	3.56712	3.52888	3.56707	3.68833	3.79105	3.96181	3.97351	3.90662	3.27735	3.7962	3.78025	3.83683	3.94754	3.77201	3.53449	3.82875	3.65125
LOC100231231	6.25641	6.79064	6.51071	7.06109	6.42743	6.82411	7.0769	6.91758	6.43238	6.78476	7.09194	6.71899	6.776	6.49566	6.14483	7.06183	7.11295	6.89747
LOC105759809	4.20904	3.09663	0.992018	2.19939	3.87127	1.18477	3.9782	2.45132	3.97268	2.56026	3.58102	3.68656	3.40163	4.14544	4.29977	3.90197	3.53087	3.66847
RECK	3.28171	2.91265	3.30943	2.97494	3.17268	3.24118	2.98573	3.54152	2.87442	3.47445	3.26822	3.45536	3.32131	3.17462	2.91619	3.2611	3.30642	3.4617
RPAP1	4.72017	4.48106	4.80826	4.56618	4.57763	4.66756	4.5375	4.57926	4.59123	4.68444	4.40408	4.57087	4.69862	4.44491	4.76611	4.62011	5.04955	5.08431
TIAL1	6.43383	6.45859	6.49194	6.7209	6.13143	6.65776	6.67515	6.9949	6.33141	6.54571	6.64661	6.75756	6.54926	6.38927	6.32621	6.65331	6.64872	6.83206
H3F3A	8.36741	8.70516	8.53618	8.86043	8.12067	8.53659	8.57682	8.81479	8.30621	8.47663	8.88662	8.7279	8.72832	8.3928	8.53522	8.69552	8.63378	9.07227
NDUFA2	6.11071	7.20193	6.41571	7.17517	6.8879	7.23784	7.27174	7.60809	7.34456	7.0353	6.59667	7.51934	7.17149	7.52861	6.3792	7.01242	7.13063	6.75669
OLFM3	6.18329	6.26311	6.13104	6.43691	6.29888	6.52518	6.43628	6.20859	5.94653	6.10339	6.54806	6.25838	6.32975	6.25173	6.07906	6.50217	6.31634	6.63831
PRKG2	1.85489	1.93336	2.46292	1.94097	1.68771	1.77802	2.03129	2.26113	2.06839	2.28457	2.27498	1.93921	2.03968	2.2949	1.93961	2.01209	1.87564	2.67625
TMA16	5.83135	5.27711	5.68151	5.65582	5.62977	5.74941	5.78627	5.94451	5.63711	5.80566	5.73814	5.92863	5.71013	5.25734	5.75221	5.85928	5.51218	5.9452
UBE2Q2	7.10755	6.9024	6.55722	7.07414	6.69803	6.99683	6.9522	6.97183	6.78609	7.05226	7.09144	7.25471	6.98284	6.81603	6.75416	7.24143	6.95445	7.25853
VEGFC	1.43678	1.29256	1.20708	NA	1.57629	1.44831	1.41837	NA	1.58243	1.45874	1.62717	1.22141	1.68171	1.49435	1.5226	1.0552	1.26914	1.87016
AIP	6.52756	6.79547	6.66541	6.71652	6.81601	6.65428	6.57684	6.67672	6.88103	6.95476	6.46386	6.60476	6.86991	7.01155	6.84654	6.65443	6.67821	6.95495
HARBI1	4.43191	4.5779	4.55766	4.29261	4.47346	4.89708	4.4911	4.436	4.55812	4.64002	4.62356	4.56331	4.56142	4.7781	4.88847	4.30429	4.26674	4.9592
LOC100218848	6.87713	6.98378	7.0879	7.09512	7.40076	7.0402	6.84506	6.83939	7.20656	7.13319	6.93236	6.945	7.16671	7.12029	7.20351	6.86551	7.24537	7.33107
MIER1	5.10827	4.82353	4.89131	4.87592	4.48007	4.94864	5.14273	4.9602	4.70756	4.83062	4.8201	4.94083	4.96148	4.87474	4.94131	5.00671	5.05945	5.45652
PER3	5.49866	6.25918	6.4028	6.63722	6.34066	6.45703	6.47231	7.07764	5.84385	6.24313	6.53665	6.88297	6.32655	5.61428	5.97557	6.54971	6.4664	6.6622
SESN3	4.38165	4.34092	4.6756	4.3248	4.40954	4.62774	4.7457	4.98661	4.35675	4.23769	4.53485	4.44121	4.29072	4.40274	4.19086	4.77916	4.97498	4.78153
ZNF276	4.61902	4.50672	4.87492	4.38025	4.8271	4.64324	4.41453	4.98485	4.61916	4.5339	4.91762	4.50256	4.67266	4.48846	4.95419	4.61369	4.68439	5.06689
LOC101233272	5.87627	6.05312	5.81975	6.14684	5.91247	5.93476	6.04016	6.59645	5.98579	6.47881	6.26002	6.45898	5.88299	5.70102	5.57433	6.42644	6.21855	6.43748
MB21D2	4.77874	5.30177	5.66325	5.13098	5.9641	5.29939	5.30503	5.05835	5.37301	5.26192	5.20404	5.41578	5.50949	5.2836	5.72478	4.97585	5.30653	5.86586
RPS27A	8.9428	9.07579	8.85073	8.95722	8.92907	8.99682	9.01808	8.91342	9.07549	9.18909	9.00861	9.07995	9.15208	9.24089	8.77762	8.94967	8.98358	9.20082
SATB2	2.04966	2.07724	1.63783	2.07642	1.71967	2.00626	2.04878	1.89709	1.95452	2.01486	1.92416	2.21342	1.87051	1.85517	1.91	2.16813	2.27465	2.25248
SLC15A2	6.04151	5.79438	5.96421	5.95003	5.59922	5.99425	5.81945	6.34994	6.00351	5.87579	5.86037	6.05277	6.39635	6.04828	5.65688	5.98522	6.04713	6.32411
TBC1D15	3.80684	4.13744	4.54619	4.30649	4.00654	4.2388	4.23609	4.52513	3.98345	3.92453	4.60328	4.23181	4.01037	3.85472	4.06217	4.27888	4.3665	4.83704
ZSWIM7	2.40048	3.56241	4.17795	2.97804	3.82117	4.19438	4.2401	4.41564	4.64055	3.72974	3.46952	3.22303	3.91304	4.34865	3.13158	2.91376	3.82019	3.98908
CADPS	7.14794	7.24811	7.48438	7.42854	7.35082	7.25053	7.4111	7.58839	7.28821	7.32613	7.65881	7.54906	7.12754	7.0092	7.17933	7.47428	7.60536	7.6248
CHCHD2	9.41437	9.7027	9.43575	9.60309	9.51668	9.67191	9.73103	9.56251	9.8902	9.84749	9.8309	9.69253	9.86636	9.96109	9.40097	9.63105	9.87454	9.39816
LOC100225392	6.03203	5.91643	7.12572	5.66625	6.04718	6.48702	6.24686	6.70607	6.13312	5.95443	6.39697	5.90533	6.33361	6.66983	6.23449	6.23337	6.13483	7.17079
LOC105759366	1.36011	1.14158	1.82597	2.39055	0.825619	1.32244	1.65373	2.55983	1.15601	1.86476	1.89866	1.29786	2.29717	1.81693	0.616523	1.88603	2.31306	2.46062
HSBP1	NA	8.89221	8.60261	8.87761	8.62375	8.72676	8.6312	8.96698	8.8595	8.96195	9.0184	8.86243	8.7703	8.87181	8.84101	8.71235	8.76325	9.10892
LOC100221933	4.52297	5.07323	4.63474	4.64654	4.98786	4.6208	4.75255	4.56347	4.88071	4.78022	4.73572	4.89961	5.26596	5.02577	4.84682	4.55927	4.7362	5.25792
NHEJ1	2.31981	2.64783	3.18257	3.12093	3.11808	3.0585	2.75529	3.56475	3.26399	3.50764	3.12244	3.33328	3.13641	2.92409	2.51599	1.74993	3.45103	3.7952
OSTM1	5.87033	5.82624	5.8686	5.88616	5.58666	6.15232	6.0107	6.36219	5.83606	5.82597	5.7827	5.94229	5.84507	5.68969	5.84004	6.15818	5.9193	6.25225
RPL10A	7.33173	8.42573	7.75763	7.74234	7.85406	7.98983	8.03203	7.9514	8.51385	8.02714	7.92171	8.13981	8.18422	8.53693	7.74024	8.29028	7.90361	7.88149
DBF4	4.1596	3.95237	4.6982	3.96221	3.75544	3.95092	4.1751	NA	4.42526	3.83538	4.30548	4.13857	4.32164	3.83044	4.48797	4.26985	4.4027	4.69839
LOC100218076	1.50045	0.396601	1.4696	1.22381	1.66612	0.322924	1.44826	1.8929	1.81623	1.28346	1.23244	1.26694	0.72718	0.764841	1.64326	1.21326	1.7343	2.13458
LOC105759051	3.07797	3.89491	4.10649	4.12002	4.50888	3.96126	4.3491	3.99559	4.33558	4.37551	3.69877	3.96603	4.24452	4.63596	3.43649	3.03392	4.37516	4.64296
MRPL18	7.1333	7.26292	6.9715	7.0759	7.30764	7.27555	7.01374	7.22749	7.39143	7.25998	7.03419	7.23579	7.08488	7.19733	7.27534	7.22091	7.18471	7.36538
TMEM242	5.3727	6.12366	6.08512	6.3214	5.95928	6.03176	5.87057	6.0484	5.85632	5.88457	6.17379	6.23706	6.09217	5.54671	5.83276	5.94975	6.00214	6.60829
UBA5	5.0993	5.19848	4.83051	5.40505	4.92986	5.33049	5.27246	5.29728	5.02823	5.13924	5.14861	5.21752	5.22272	5.09853	5.11345	5.50737	5.06682	5.34193
WDR17	3.80592	4.17422	4.55852	4.45141	4.31372	4.20251	4.37583	4.6904	4.01159	3.92036	4.42283	3.89828	4.4055	4.00219	4.30542	4.49495	4.50502	4.5993
ZADH2	4.71608	4.69513	5.03347	5.07368	4.85352	4.91655	5.02364	NA	4.82432	4.60113	5.16807	5.0727	4.81665	4.56613	4.59541	4.87481	5.25478	5.30326
API5	6.76293	6.81747	6.68172	7.14487	6.53089	7.01237	7.01166	7.08077	6.57571	6.90882	7.14393	6.99263	6.85538	6.67036	6.71497	6.90648	6.95853	7.16997
CLPTM1L	5.21099	5.54925	4.84821	5.72967	4.9888	5.33672	5.50132	5.36329	5.49313	5.37532	5.65445	5.36893	5.50494	5.26443	5.1124	5.68995	5.60703	5.51322
GUCY1A3	7.13078	7.98548	8.49976	7.97197	7.88765	8.10382	7.91959	8.60106	7.72367	7.94034	8.33643	7.67913	8.16453	7.78578	7.68192	7.79283	7.96076	8.70407
LOC100226437	8.88286	9.38923	9.02984	9.03584	9.11523	9.05977	9.07602	9.43063	9.08211	9.69814	9.04196	9.36664	9.38586	9.43375	8.94294	9.10043	9.05741	9.55771
LOC101233820	2.73497	2.94575	2.9358	2.29383	3.90108	2.52626	2.79215	2.37594	2.98715	3.72309	2.78472	3.79306	3.08437	3.26659	3.96866	2.30275	2.98784	3.6833
RBKS	5.81101	5.94982	5.8128	NA	5.76321	5.7993	6.0384	5.9263	6.2792	6.06351	5.99959	NA	5.96743	6.10604	5.77937	5.90347	5.92106	NA
FEN1	4.85876	5.02713	4.93361	4.45471	5.17462	4.95139	5.04563	4.96867	5.18851	5.33982	4.60628	5.00562	5.00383	5.03348	5.05082	4.95156	5.04263	5.17381
LIAS	5.53254	5.71908	5.66657	5.90825	5.85566	6.11729	5.6799	5.86612	5.54229	5.47132	5.85527	5.88255	5.76675	5.28633	6.13716	6.06325	5.76661	5.96734
LIG4	3.95696	3.86797	4.34126	4.10092	3.94093	4.21285	4.36617	4.44729	4.06339	4.1064	4.05441	4.17554	4.25618	3.78778	3.83109	3.98856	4.04487	4.80954
SLC27A6	1.87094	1.96591	3.8935	2.40073	0.839932	2.53628	2.36201	3.7647	2.93784	3.14738	2.44021	3.02991	3.41776	1.39417	3.19218	2.16652	2.57271	3.74245
SSNA1	5.49334	5.45857	5.45994	5.3303	5.47947	5.57306	5.4393	5.84175	5.77191	5.35588	5.45424	5.93144	5.63742	5.76101	5.94743	5.23318	5.23293	5.81093
ANO3	6.49347	6.70705	7.7313	7.32601	7.26823	7.40577	7.33137	7.9188	6.95219	6.85359	7.18359	6.94361	6.92268	6.85518	6.73394	7.27525	7.58997	7.62239
LOC105758756	3.42475	4.98336	3.42057	4.54794	2.61547	3.9886	3.96514	4.58302	4.13605	3.68908	3.35322	4.89756	4.70308	4.54143	3.52152	4.79991	4.53491	5.1391
NAPRT	4.1782	5.79082	4.87737	3.93257	5.99804	4.80558	5.50237	5.678	6.22658	5.43517	6.17337	4.11543	6.41349	5.75297	5.69715	4.10647	4.99523	6.09387
PSMC6	6.96047	6.95491	6.98501	6.8083	7.10177	6.94499	6.84567	7.05701	7.04947	7.19067	6.91716	7.11683	6.93316	6.95086	7.23914	6.84713	6.96047	7.18746
XRCC3	2.67281	2.58551	3.34157	2.61369	2.96056	3.00284	2.81277	3.14216	2.95565	3.1231	3.07405	2.27462	3.14495	3.20905	2.93178	2.36135	3.01765	3.54197
APPL2	3.64483	3.75879	3.75424	3.85069	NA	3.56062	3.90708	3.51856	3.97147	3.64209	3.95654	3.66926	3.87002	3.64671	3.9049	3.67987	3.76581	4.09319
CDH11	5.16582	5.87469	5.77016	5.79167	5.50135	6.30401	6.21304	6.31657	5.64022	5.18801	6.11838	5.65231	5.97816	5.84296	5.4236	5.48251	5.70717	6.45763
CDH20	5.10924	5.34425	5.36264	5.58547	5.40358	5.38391	5.42236	5.64814	5.27754	5.07135	5.58461	5.42644	5.11779	5.11781	5.68401	5.3722	5.37573	5.73398
CIRBP	10.239	10.2896	10.2574	10.7008	10.4157	10.5482	10.4925	11.1287	10.4525	10.7803	10.5193	10.658	10.6128	10.5885	10.4049	10.8008	10.5595	10.1009
ERCC6	4.213	3.66718	4.06002	3.79892	3.54762	4.05421	4.33981	4.27748	3.97538	4.11996	4.39798	4.04958	4.08034	4.04422	3.54268	4.57903	3.86411	4.31678
LOC100190135	1.46697	2.19602	2.8268	1.83545	3.50904	2.25514	2.77044	6.02823	6.05929	2.27862	2.2665	2.69385	3.45703	5.25385	1.37658	1.57806	4.46923	3.17345
LOC100218427	0.560166	1.33595	3.35778	1.2184	0.72928	2.61605	2.49057	3.64978	3.40834	1.44483	2.51631	1.26008	3.4093	2.56528	1.49879	0.832842	3.08298	1.9509
LOC100223432	3.01805	3.84178	3.55153	4.32663	2.89811	4.01468	4.03523	4.02925	2.52356	4.08309	4.1799	4.38392	4.36789	3.80234	3.4375	4.54189	3.91153	3.6234
SETD3	6.12005	6.0866	5.75752	6.161	5.86993	6.03305	6.19528	5.93026	6.16131	6.26851	6.25438	6.08044	6.16338	6.00461	5.91209	6.09408	6.18834	6.23932
SLC46A1	1.93277	2.11668	2.7918	1.8899	2.47065	2.4425	2.74289	2.2154	2.90369	2.32508	2.08235	1.70078	2.8904	3.19988	2.29699	1.6668	2.64399	2.93716
ZBTB42	2.73335	3.01742	3.86653	3.17309	2.98424	3.25422	3.59013	3.61474	3.24469	2.99966	3.39709	2.72801	3.6055	3.31101	2.89948	2.99164	3.55656	3.84726
ZXDC	3.84876	3.97668	4.08729	3.94757	3.74876	3.76867	3.95165	4.05483	3.91073	3.71103	4.03509	3.87867	4.03551	3.96646	3.93412	3.98664	3.89949	4.46232
CADM2	6.94782	7.37667	7.29869	7.69009	6.99706	7.59987	7.79446	7.72481	7.11539	7.39996	7.66471	7.29419	7.23548	7.27823	6.91626	7.50897	7.6121	7.70841
GMPR	4.61237	4.31499	4.63796	4.18812	4.56947	4.34292	4.47526	4.25209	4.7005	4.56518	4.43766	4.35712	4.67119	4.46932	4.58893	4.54558	4.54051	4.78331
MSRB3	2.94518	2.88902	3.21357	2.87269	2.95713	3.11037	3.29762	3.1927	2.684	3.17404	3.20107	3.14008	3.05269	2.57477	3.02523	3.06815	3.26431	3.34101
SYAP1	5.16177	5.65319	5.30515	5.7412	5.16297	5.74569	5.78935	5.91354	5.32625	5.59066	5.5959	5.51091	5.57128	5.14264	5.22498	5.64801	5.60223	5.99625
CARKD	5.33115	5.01908	4.89749	5.26634	5.03709	5.26361	5.22853	5.54761	5.07004	5.21791	5.31742	5.3218	4.90715	5.05691	5.16312	5.54216	5.22966	5.34904
CROT	5.16284	4.70726	4.61248	4.64987	4.41552	4.74315	5.08143	5.36941	5.17877	5.1334	4.84497	5.25577	4.63402	4.92428	4.53511	5.29211	4.92918	5.2469
DPY19L4	4.41465	4.37686	4.90091	4.53759	4.48297	4.78758	4.72093	4.94865	4.31715	4.52395	4.53356	4.71385	4.76279	4.2814	4.27015	4.81256	4.81006	4.9234
LOC100220715	4.24661	4.53979	3.92641	4.51877	4.30327	4.67878	4.38623	4.96483	4.99595	4.89047	4.85776	4.72908	5.00345	4.54821	4.0927	4.10181	4.74694	4.43543
LOC101233994	4.85504	4.75271	5.07101	4.64426	4.70382	5.27679	5.5511	5.57615	4.75254	4.16202	5.10589	4.99664	5.03474	5.19993	4.90081	5.29242	5.13071	5.04685
LOC105758542	5.35949	5.1399	4.96776	5.20928	4.90502	5.32537	5.07315	5.42777	4.75016	4.94271	5.44509	5.47835	5.14967	4.97099	5.33131	5.19328	5.34448	5.76405
MAN1A1	3.15088	3.38286	3.83304	3.62174	3.21013	4.02048	4.20805	4.29509	2.84889	2.70385	3.96263	3.68344	3.39398	3.69674	3.47229	3.90383	3.60849	4.1354
CDKN2AIP	4.09044	4.29122	4.30293	4.26444	3.98318	4.3455	4.41245	4.26896	4.25066	4.47546	4.09445	4.25151	4.35172	4.38038	4.04667	4.22651	4.12668	4.73701
LOC100222684	4.82893	4.37222	4.67453	3.5707	3.6515	4.59893	4.49793	4.96259	4.92913	5.53701	5.08142	4.34021	4.44892	5.61459	4.13689	4.27714	4.57359	5.49306
PRKD3	4.80906	4.73721	4.74287	4.77137	4.41431	4.91246	4.75708	5.33682	4.70367	4.66495	4.87618	5.25187	4.74439	4.52792	4.83143	4.99761	4.76783	5.13961
TWSG1	6.2337	6.08977	5.84628	6.32771	5.84037	6.13603	6.34314	6.48762	6.14891	6.14687	6.31598	6.13593	6.14396	6.26415	5.73177	6.31146	6.25714	6.56083
EFR3A	7.1298	6.52065	6.90193	6.96425	6.69097	6.90544	6.86394	7.15417	6.83378	7.17658	7.19615	7.36152	6.85045	6.50912	6.77375	7.30185	7.13317	7.02857
LOC100222104	6.33309	5.23443	6.87489	5.45942	5.80445	5.7715	5.91698	6.46083	6.37359	5.97554	6.10978	6.03177	6.27883	5.54289	7.19441	5.69338	6.21808	6.82737
MBP	9.70363	9.17039	9.50729	9.49145	8.45367	9.66628	9.36794	9.99757	9.24391	9.69123	9.58127	9.98311	8.99883	9.21616	9.3607	10.2892	9.65792	10.0336
SAMD13	NA	4.58704	4.34062	4.93246	4.53277	4.60431	4.68494	4.97503	4.70874	4.89242	4.68931	4.52632	4.68966	4.37844	4.51032	4.63939	4.73037	5.08852
TRMT11	3.95848	4.12686	4.37103	4.07354	4.68174	4.49856	4.17636	4.51885	4.06096	4.01015	4.25867	4.93057	3.98544	3.78175	4.75686	4.11055	4.53168	4.54247
TSPAN12	5.2451	5.40137	5.39548	5.44569	4.96396	5.41997	5.41073	5.42282	5.18216	5.46729	5.45199	5.4059	5.37923	5.16576	5.21506	5.42818	5.39237	5.84838
LOC100222126	1.18705	0.826283	0.818986	0.795459	0.689524	0.730774	1.21293	0.730877	1.10019	1.42666	1.00951	0.911714	1.09794	1.2462	1.08624	1.1047	0.986678	NA
PCYT1B	5.5442	5.10361	5.62383	5.08171	5.58979	5.36463	5.48949	5.35018	5.52129	5.05817	5.43247	5.40386	5.38876	5.58896	5.55144	5.39646	5.53388	5.61229
TNIP2	1.1931	1.27277	1.767	1.31376	1.71653	1.44434	1.53375	1.69372	1.466	1.11733	2.0163	0.417304	1.89488	0.712881	2.09645	1.88792	1.39625	2.4629
ZNF518B	3.73259	3.78061	3.83029	3.88096	3.92366	3.90943	3.90544	3.93541	3.78291	3.54427	4.17748	3.7551	3.75712	3.50839	3.90568	4.00849	3.87375	4.17785
CCDC18	1.2036	1.13082	2.28779	1.3632	1.58973	1.84223	1.6887	1.52033	0.989936	1.1055	1.89671	2.62962	1.43276	1.1557	1.63589	1.7855	1.39258	2.22829
LOC100218541	4.18046	5.0305	5.11059	5.00787	4.56857	5.68883	5.51568	5.10641	5.15291	5.47979	4.42108	4.78311	6.00307	5.85995	4.85812	4.4835	4.86927	5.26356
LOC100220976	7.07257	7.05928	7.22349	7.34559	7.17171	7.33409	7.39972	7.28234	7.0703	6.88809	7.47157	7.26077	7.16461	7.36513	7.01133	6.91668	7.4965	7.48349
LOC105759935	2.95844	3.10112	3.9944	3.19342	3.47856	3.67608	3.67191	3.31538	3.77548	3.51956	3.10146	3.17081	3.84216	4.05299	NA	2.93522	3.52978	3.62001
MED21	7.27279	7.47502	7.48195	7.24776	7.23493	7.40309	7.36164	7.54056	7.45788	7.23866	7.15673	7.43285	7.32305	7.61612	7.33709	7.335	7.51352	7.76156
METTL13	3.76054	4.11187	3.89304	4.32894	4.23002	4.48154	4.09958	4.03097	4.59474	4.55598	4.05328	4.15277	4.24331	4.24697	3.9718	3.50348	4.19266	4.65802
PXDN	4.18951	4.09321	4.65906	4.3282	4.30841	4.39215	4.44519	4.55855	4.23255	4.63437	4.42466	4.40057	4.5206	4.18979	4.16214	4.45077	4.11081	4.71138
SCYL2	4.65776	4.82033	4.66368	4.85325	4.63681	5.07544	4.78194	5.2275	4.91797	4.67738	4.92469	4.72	4.86662	4.78556	4.50291	4.8088	4.84675	5.12783
WDR55	3.12148	3.51098	2.70962	3.42731	3.64703	3.1597	3.78589	3.75735	4.17962	4.12454	3.58629	3.80351	4.01379	3.30544	3.37881	2.86798	3.2473	3.7021
CA2	7.47631	6.78934	7.34484	6.77174	6.76767	7.62229	7.27904	7.50925	7.31312	6.82442	7.24399	7.17269	7.54924	7.52558	7.11899	7.1757	7.20174	7.45084
KHDRBS3	5.46797	5.66289	5.39891	5.5632	5.15892	5.57507	5.6458	5.62418	5.48127	5.44876	5.71498	5.79	5.39471	5.25355	5.38638	5.76266	5.86926	5.80733
MCCC1	3.85276	4.16917	4.70275	4.43658	4.12976	4.11733	4.32643	4.72664	4.05932	4.23939	4.33448	4.30773	3.91758	4.22452	3.92035	4.37039	4.54171	5.00497
XPNPEP1	5.27357	5.53768	5.50556	5.28064	5.81294	5.52172	5.33061	5.41975	5.54902	5.59891	5.22423	5.35501	5.51864	5.51204	5.56855	5.39373	5.45897	5.93696
C2CD3	5.72809	5.62728	5.83556	5.85107	5.99594	5.93568	5.87764	6.0801	5.75225	5.71057	5.68942	5.8386	5.82993	5.54485	5.82128	5.57532	5.94406	6.27274
C6H10orf90	2.15654	NA	1.90223	1.95325	1.7013	2.30494	1.96058	2.05142	2.26353	1.77186	2.10427	2.52821	1.97132	2.35006	1.68748	2.5159	2.10084	2.28396
COPS2	6.19661	6.03709	6.05275	6.18496	5.91114	6.30646	6.25907	6.40155	6.08685	5.98653	6.34682	6.3457	6.05648	5.959	5.94777	6.37799	6.20439	6.38755
LOC105758969	5.32836	5.408	5.62787	5.63696	5.34526	5.57155	5.66432	5.81979	5.20178	5.43252	5.60079	5.29391	5.37459	5.26571	5.5374	5.63565	5.59922	5.9405
MPP7	2.55728	2.9832	2.92748	2.87753	3.11188	2.68381	2.93806	2.99413	2.49472	3.15262	3.21357	3.03507	2.8438	2.63066	2.74098	3.06242	3.0439	3.18312
SMARCA1	6.78692	7.06087	6.91473	7.42605	6.84029	7.26066	7.291	7.2971	7.03009	7.06124	7.24041	6.84784	7.17554	6.68175	6.782	7.27871	7.39399	7.34016
SPG21	5.07735	5.1821	4.8278	5.19902	4.99535	5.25732	5.10042	5.17907	5.1769	5.11826	4.80272	5.1944	5.26747	5.36301	5.05568	5.32632	4.83243	5.50509
TMEFF2	5.7529	5.98071	5.99029	5.69609	6.03723	5.92954	5.90515	5.76868	5.98938	5.94768	6.11977	5.95178	6.14129	5.86963	5.88895	5.64631	6.03432	6.15295
TRIM2	6.4554	6.52263	6.77656	6.90367	6.59609	6.79968	6.84289	7.03743	6.62261	6.4979	7.00891	6.65017	6.62722	6.32676	6.42562	6.94172	6.87724	6.93111
ACAA2	4.91042	5.61463	5.27895	5.31663	5.09712	5.70919	5.52015	5.50699	5.62284	5.3696	5.75704	5.66012	5.75332	5.8297	5.23181	5.19572	5.36518	5.24262
CITED2	5.83917	6.28683	6.16342	6.38703	6.19979	6.22592	6.42335	5.75631	6.43286	6.35438	6.28846	6.09122	6.33446	6.21864	6.1787	6.18036	5.90076	6.74643
PPCDC	2.40968	3.02871	2.9819	2.89213	3.85371	3.43887	3.26654	3.18809	3.80075	3.44673	2.62493	2.42878	3.76367	2.92176	2.79346	2.70032	3.24866	3.76613
CFAP70	2.88803	1.98953	2.81087	2.37118	3.32475	2.95424	2.58462	3.79608	3.39708	3.93818	2.10565	2.70388	3.02353	2.39678	2.10047	2.74944	3.59367	3.40517
INTS8	5.30586	5.11093	5.10952	5.07148	5.20067	5.08288	5.18571	5.2835	5.33609	5.06427	5.25181	5.17819	5.14338	4.95212	5.26856	5.16663	5.28364	5.52963
MTBP	1.99575	1.71793	2.69732	2.4095	1.80727	2.56393	2.29303	2.90732	1.98688	2.43632	2.41562	1.82313	2.04973	2.1353	2.16905	2.29878	1.87826	3.15769
NDUFB8	9.21918	9.22583	9.24215	8.97127	9.33831	9.32988	9.08635	9.37264	9.33492	8.99871	9.13991	9.24221	9.27432	9.38997	9.28471	9.36164	9.14738	9.41462
PIK3C3	6.78495	6.86467	7.00976	6.97544	6.92484	6.99106	6.94291	7.21873	6.86245	6.98077	7.10312	6.91752	6.97596	6.74311	6.89595	7.0734	6.95124	NA
PPM1M	4.4455	4.49895	4.95154	4.2822	4.96567	4.57419	4.26237	4.86002	4.70787	4.58799	4.29509	4.73856	4.5835	4.7773	5.08488	4.79808	4.33421	5.09503
ALKBH1	4.38195	4.59786	4.3827	4.52394	4.58316	4.44739	4.54206	4.50925	4.62246	4.71042	4.33673	4.44684	4.60766	4.67923	4.39892	4.27339	4.52284	5.01644
CD47	7.21569	7.61386	7.29089	7.80086	7.19143	7.62035	7.50919	8.38279	7.41307	7.73782	7.61181	7.95117	7.71311	6.91954	7.2013	7.94905	7.6819	7.91848
DLD	7.79736	7.64043	7.62233	7.83742	7.4494	7.7528	7.80896	7.87934	7.60685	7.77382	7.87879	7.9897	7.75081	7.4582	7.78188	7.83146	7.64679	8.01862
G3BP1	6.45492	6.97905	6.68317	6.98643	7.04425	6.94575	6.88791	6.88145	6.83958	6.93883	6.96129	6.75333	7.18484	6.98477	6.68102	6.62273	6.66893	7.20455
KDELR3	1.61563	2.54726	1.49491	2.07239	2.35012	2.13798	1.98216	1.9784	2.10136	2.6789	2.59341	2.44411	2.33872	2.81284	1.96611	1.95738	2.40229	1.92297
LOC100228612	6.48326	6.63384	7.22522	NA	6.7335	6.94949	6.78678	7.29873	6.72841	6.74148	6.87411	6.60899	6.71022	7.02017	6.891	6.57289	6.85882	7.20164
LYRM7	5.52706	5.59554	5.8944	5.80729	5.64004	5.87445	5.84473	6.21961	5.56438	5.83844	5.8495	6.21208	5.81823	5.52354	5.92641	6.0567	5.70997	5.60631
MDM1	4.83422	4.90608	4.90616	5.10831	4.72611	5.2393	4.91967	5.36229	4.8431	4.80275	5.09431	5.20177	4.81987	4.70316	5.03514	5.12433	4.91433	5.22217
RRP9	3.79655	4.23885	NA	3.76067	3.82331	4.30949	3.84738	3.81852	4.23062	4.26334	3.80281	4.02291	4.37077	4.58744	4.10034	3.68697	3.89844	4.57376
MTPN	8.30279	8.36246	7.93642	8.65467	8.00943	8.5848	8.5027	8.50257	8.12562	8.81776	8.91157	8.59017	8.31718	8.14759	7.88537	8.73994	8.43015	8.72299
RPUSD3	5.26887	5.8732	6.00614	5.88145	6.15309	5.92304	5.93148	5.50984	5.77058	5.9349	5.60964	5.31222	5.72264	6.15172	6.17715	5.38986	5.94467	6.58325
SLC35A3	2.28267	1.60461	1.62823	2.36151	1.41781	1.80181	2.15967	2.16302	2.40501	2.16042	1.93648	2.02587	2.31847	1.28389	1.5779	2.08259	2.4957	2.76083
CUTC	7.08938	7.3944	7.00888	7.27364	7.1615	7.29002	7.22858	6.89365	7.5197	7.16314	7.16029	7.07573	7.36178	7.59723	7.15094	7.2083	7.2615	7.56547
ENDOG	4.92829	5.01377	5.3474	4.79471	5.73175	5.22765	5.40423	5.1365	5.58487	5.72588	4.94365	4.71599	5.85495	5.54389	5.41938	5.16071	5.33228	5.13681
RASGEF1B	4.75044	4.32481	3.97401	4.29479	4.39688	4.63585	4.63912	4.48134	4.6619	4.38512	4.80379	4.67245	4.06875	4.63867	4.10277	4.66878	4.80271	4.66284
SLX4IP	3.26045	2.97912	3.53053	3.31148	2.565	3.40506	3.44548	3.53236	2.78805	3.27878	3.35852	3.10426	3.22822	3.21253	3.86601	3.53507	3.05992	3.65243
TNFRSF9	4.96204	5.12904	4.71812	5.34154	5.41912	5.38541	5.38267	5.60782	5.73092	5.21595	5.43592	5.5392	5.24886	5.60296	5.1302	5.47886	4.98833	4.8574
TRIP13	1.65676	2.95257	2.44206	2.50925	2.27288	2.00464	1.84916	2.80005	2.84461	3.10424	2.54826	1.86047	2.82925	2.36268	2.43144	2.51395	2.68736	3.09474
ARPP19	11.5531	11.1846	10.7181	11.365	10.913	11.4394	11.3734	11.4207	11.0556	11.4304	11.5009	11.432	11.286	11.0946	11.0514	11.7394	11.1857	11.6773
KIAA0226L	2.30621	2.03061	2.25422	2.47501	2.23582	2.30393	2.10737	3.09808	2.03304	1.85098	2.67994	2.7563	2.10054	1.91905	2.83951	3.153	2.04194	2.61671
LOC100227914	1.89929	2.92131	1.30881	2.66749	2.98693	2.78102	2.72246	3.16655	2.8647	2.62814	2.85636	2.74344	2.61218	3.4974	1.67378	2.65225	2.67224	2.48869
LOC105758606	4.58184	4.9709	4.91387	5.09749	5.06213	5.07944	5.06732	5.00019	4.5616	4.8464	4.94871	4.71898	4.93399	4.56934	NA	4.66979	5.22025	5.64611
PHYHIPL	7.5083	7.2821	7.49362	7.55995	7.10067	7.31757	7.74874	7.50086	7.41542	7.1509	7.87739	7.62439	7.34208	7.39751	7.37624	7.75412	7.46741	7.70455
PIGX	5.70471	5.79547	5.89405	6.16943	5.88845	5.9925	5.79981	6.58772	5.80548	5.80363	5.62831	6.1016	6.07606	5.73896	5.69207	6.0034	5.83528	6.54447
PPM1H	5.15021	5.20603	5.34832	5.16175	5.53281	5.18057	5.26908	5.07535	5.27686	5.48068	5.58359	5.20735	5.27285	5.1219	5.26961	5.12646	5.35231	5.58362
PSMD13	7.09844	7.47796	7.40112	7.37182	7.4522	7.3928	7.29472	7.03171	7.59533	7.61325	7.35977	7.22694	7.60156	7.56082	7.29459	7.14456	7.39025	7.80577
TAF1	6.71735	6.65528	6.83317	6.57745	6.59121	6.72719	6.74848	6.58622	6.5559	6.64274	6.69485	6.74164	6.61036	6.69327	6.97272	7.01021	6.75676	6.77049
TMX1	5.91636	5.4169	6.14733	5.39915	5.48273	5.9465	5.69841	5.659	5.3047	5.5042	5.85845	5.61775	5.41341	5.8319	6.11065	6.04193	5.65423	6.50456
DLK2	2.23593	2.58503	2.51292	2.31869	2.99582	2.56751	2.84159	2.14106	2.65857	2.28915	2.42986	2.58514	2.33462	2.5917	2.78655	1.96821	3.00967	3.13505
DQX1	4.25803	4.49645	3.81424	4.23214	4.34639	4.34485	4.36836	3.77086	4.33133	4.80558	4.09817	4.34577	4.39807	4.65487	4.11616	4.16223	4.55028	4.77292
FAM161A	2.58295	2.84762	3.01452	3.4544	3.07008	3.34795	3.12966	3.22931	3.32233	3.24129	2.73901	3.59404	2.83634	2.67203	2.8431	2.84567	3.19256	3.39615
HAX1	6.56584	6.8263	6.68009	6.564	6.82831	6.65722	6.89911	7.02765	6.8246	6.86915	6.69548	6.78488	7.14774	7.13713	6.60459	6.42132	6.90054	6.85723
LOC100220786	3.72065	2.51117	4.02272	3.96642	3.41336	4.42907	3.65689	3.47707	4.40114	4.40146	4.19301	3.47556	4.31699	3.82212	3.05435	3.20011	3.48362	4.23959
LOC100230587	4.80878	5.11938	4.88313	5.13998	4.88677	5.00856	5.07024	5.14685	4.94501	5.27245	4.81429	4.97672	5.07683	5.07441	4.6396	5.31095	5.08532	5.31622
LOC100232665	0.631481	0.858397	1.40097	1.01155	1.07866	0.779548	0.790586	1.93901	1.17199	0.966572	2.54148	1.50561	1.29843	1.52291	0.771337	1.80183	1.21014	0.667431
RRAGD	5.77134	5.44491	5.49751	5.42966	5.43531	5.91686	5.90392	5.87037	5.47826	5.47402	6.07738	5.67099	5.43385	6.0402	5.25345	6.13706	5.67911	5.72706
HADHB	7.94203	6.89714	7.96387	7.43623	7.56514	7.94815	7.66724	7.94788	8.20806	8.18555	7.40696	7.17885	7.99148	7.81948	7.8965	7.23472	7.71267	8.20589
LOC100232595	6.22818	5.47386	5.62832	6.0553	5.50421	6.25043	6.17323	6.24456	6.0167	5.91293	5.91288	5.93318	5.64312	6.11827	5.92478	6.02477	5.85773	6.13636
LOC105759330	3.27642	2.84828	3.11701	3.06789	3.16524	3.0713	3.64043	2.71213	3.68071	2.6013	3.15211	3.31783	3.55714	3.67781	2.94811	3.07142	2.74662	4.00844
MMAA	3.22206	3.64552	3.35934	3.37277	3.60848	3.6604	3.68231	3.66147	3.5869	3.36353	3.88501	3.33005	3.58117	3.0949	3.64124	3.65819	3.4114	3.70299
SRSF2	7.68716	7.78956	7.7208	8.0674	7.50071	8.01761	7.91219	NA	7.70381	8.01077	7.89688	8.26928	7.91495	7.69964	7.65069	8.28794	8.08118	7.67849
TMTC3	5.15479	4.86348	4.86153	4.78231	4.73143	5.07708	5.32105	4.94381	5.17349	4.97839	4.72113	5.16271	5.12456	5.03149	4.84844	5.23607	4.96394	5.14992
TRIO	6.30283	5.99981	5.89881	6.14292	5.93673	6.21485	6.31579	6.19297	6.06409	5.96474	6.25856	6.08939	6.07488	5.92947	6.1481	6.19175	6.29733	6.32717
CNRIP1	6.26787	6.90925	6.58404	6.7952	6.4806	6.7163	6.75621	6.9432	6.25297	6.5269	7.04771	6.84889	6.52873	6.51601	6.65787	6.62756	6.83316	7.0165
DENND5A	5.9638	6.00893	6.00647	6.22071	5.82345	6.11056	6.1203	6.17544	5.90055	5.90793	6.21159	6.15527	5.90374	5.9155	5.85778	6.28597	6.15861	6.28071
DIEXF	5.65864	5.01088	5.96391	5.19448	5.37476	5.62376	5.09298	5.76712	5.48955	5.3446	5.38357	5.20706	5.67108	4.97821	5.46673	5.40649	6.33389	6.25736
FAM19A2	4.22339	4.05521	4.21027	4.16928	3.66058	4.07401	4.35177	4.21469	4.13725	4.07561	4.31642	4.30814	4.29415	4.03312	3.84533	4.42074	4.4038	4.37825
GABRG2	6.64012	6.74748	7.20237	7.00857	6.74625	7.07249	7.05435	7.31935	7.0382	6.84486	7.32174	7.06966	7.07355	6.65658	6.88498	7.32981	7.30845	6.62174
LOC105759157	4.72405	5.00606	5.25881	4.67954	4.48618	4.9238	4.79436	4.29582	5.5458	5.10265	4.53896	4.5487	4.92606	4.83786	5.15225	5.41765	5.30556	5.47532
TRHDE	3.45532	3.50054	3.4962	3.46906	3.31555	3.74273	3.77523	3.70166	3.6056	3.8166	3.8909	3.20374	3.45817	3.49949	3.07841	3.84885	4.113	3.6677
UEVLD	3.68896	3.43388	3.87424	3.64153	3.78091	3.32373	3.2797	4.03926	3.80269	3.57902	3.46577	3.6636	3.54537	3.62018	3.72528	3.64042	3.78239	4.42617
YWHAB	9.21456	9.208	9.25398	9.37402	9.2047	9.42367	9.41087	9.55217	9.11803	9.28237	9.50396	9.483	9.18736	9.12139	9.25134	9.3535	9.40366	NA
ADAMTS14	NA	1.20714	1.72983	1.51924	1.90314	1.65378	1.35918	1.91655	1.55382	1.42566	1.40962	1.51242	1.56437	1.57752	1.19112	1.30223	2.06854	2.08726
GALC	4.26552	4.05237	4.44815	4.16229	3.99247	4.34516	4.54734	4.55993	4.12629	4.21483	4.19393	4.44043	4.2895	4.12861	4.04324	4.2975	4.33836	4.59065
GLYR1	7.29149	7.21853	7.2603	7.23577	7.14857	7.28516	7.25839	7.45514	7.16795	7.26248	7.16417	7.38724	7.32094	7.32139	7.27134	7.37396	7.27905	NA
KANK4	4.15585	4.06037	4.48267	3.79851	3.84281	4.24433	4.18234	4.30137	4.68019	4.20727	4.11102	4.15226	4.48944	4.49896	4.17042	4.00675	4.19338	4.41281
LOC105759414	2.3603	2.10563	2.65166	2.18755	2.59141	1.87857	2.21554	2.75842	2.63663	2.34594	2.53551	1.84417	2.87221	2.68726	2.11606	2.20151	2.75315	2.94639
POLR1B	4.57911	4.73517	4.70229	4.6193	5.1682	5.18878	4.73018	5.06877	4.81342	5.0515	4.47973	4.46126	4.67861	4.93245	4.56392	4.63722	4.8751	5.4541
RARB	3.70635	3.46929	4.02057	3.69898	3.71546	3.35342	3.59943	3.85209	3.79884	3.48065	3.40461	3.58159	3.7908	3.7628	4.02137	3.55951	3.81519	4.36965
SASS6	5.65898	5.23264	5.25735	5.17426	5.08945	5.40529	5.36175	5.93631	5.68906	5.31884	5.46105	5.64009	5.19111	5.00187	5.60901	5.70506	5.44807	5.74293
SOCS2	1.84391	1.6211	2.69323	1.84433	2.4756	2.02383	1.75515	2.49421	2.12264	1.64845	1.67014	NA	2.46779	2.43131	1.73399	1.89587	2.51978	2.60179
SPPL2A	5.23125	5.17426	4.94657	5.19008	5.00565	5.17722	5.23944	5.10609	4.91104	5.25855	5.37047	5.17744	4.94473	5.19606	4.98689	5.59195	5.00578	5.67683
TRMT12	4.328	4.9322	4.58065	4.90349	4.51541	5.17202	4.73781	5.39458	5.04328	5.29799	4.26339	5.53116	5.08535	5.23616	4.15219	4.25762	4.97441	5.47254
VSTM2A	6.97774	6.58852	7.00624	6.77992	6.98335	7.01509	7.03746	7.15945	6.91016	6.62019	6.91578	7.07642	6.70561	6.64149	6.69274	7.3551	7.03453	7.14257
ATPAF1	6.42943	6.31454	6.76378	6.18304	6.49765	6.75683	6.41708	6.56717	6.29695	6.22937	7.02058	6.47281	6.3434	6.65205	6.58198	6.2916	6.39313	6.98643
CSNK2A1	6.54857	6.66841	7.12189	6.88218	6.88725	6.92874	6.81771	6.82349	6.95934	6.70369	6.89275	6.88596	6.79625	6.76928	7.09967	6.73526	6.77708	NA
LOC100222408	1.71281	2.33649	2.22752	2.41523	2.53284	2.55216	2.13982	2.14418	2.826	3.05007	2.59154	2.16293	2.19304	2.55318	1.94133	2.22375	2.38768	NA
TAF1B	3.63604	4.02508	3.97642	4.05157	4.14543	4.18381	4.14217	4.74617	3.98668	4.04868	4.26733	4.4317	3.98764	3.65683	3.54152	4.22583	4.04855	4.35702
TKFC	5.09748	5.40561	5.45088	4.97711	5.92555	5.30904	5.44881	5.06689	5.81618	5.61162	5.09552	5.50018	5.56876	5.50159	5.37867	5.12155	5.48089	5.73897
CHCHD3	7.20772	7.13474	7.3597	6.98973	7.42871	7.36915	7.19601	7.13453	7.2738	7.32022	7.03854	7.0223	7.11583	7.29485	7.49455	7.26317	7.18775	7.60178
DCUN1D1	5.61925	5.62895	5.52756	5.81433	5.42295	5.8845	5.88864	6.00613	5.58299	5.76439	5.96869	5.61203	5.86376	5.45163	5.39388	5.7946	5.6375	6.03045
LOC100228523	7.80708	7.79776	7.83144	7.75978	7.90724	7.78526	7.7012	7.8928	7.8097	8.09735	7.52973	7.7699	7.85479	7.98197	7.86826	7.73326	7.87619	8.20156
LOC101233075	5.89452	6.178	5.78567	6.19147	6.09805	6.18102	5.9692	6.57003	6.1923	6.2045	5.99996	6.48151	6.37381	6.55328	5.6255	5.99235	6.37797	6.15425
METTL25	4.32283	4.35353	4.23183	4.15294	4.33929	4.44466	4.19743	4.45185	4.31258	4.50448	4.77115	4.22159	4.46369	4.26565	4.09414	4.30115	4.23442	4.79497
TLCD2	4.12049	4.21545	4.5088	3.9596	3.83514	4.45986	3.94911	4.10252	5.15128	4.6291	4.15946	4.14476	4.60993	4.90224	4.17214	4.44736	4.27121	4.39337
VIPR2	3.05412	3.65329	3.79047	3.33709	3.74344	3.65119	4.36751	3.52757	3.51177	3.09147	4.34687	3.35036	3.24112	4.24412	3.36952	3.63213	3.69147	3.94507
CAPN5	3.74934	3.32052	3.82358	3.13816	3.73051	3.67488	3.87243	3.63865	3.76443	3.43372	3.47725	3.26754	3.7609	3.7734	3.47275	3.7421	3.68358	3.9925
DNAJC13	5.07598	4.86444	5.36741	5.08736	4.90009	5.26328	5.23352	5.734	4.9944	4.85205	5.23051	5.42285	5.11213	4.75503	5.11802	5.24607	5.19339	5.46988
LOC100220946	3.84735	4.23072	3.98519	4.38804	4.16952	4.18161	4.02735	3.93245	4.49266	4.23362	3.78799	3.85434	4.45	4.14879	4.05134	3.7961	4.34457	4.89894
OXR1	7.05072	6.91257	7.0277	7.25466	6.83334	7.35782	7.14874	7.38705	7.1209	7.2116	7.26959	7.07044	7.07663	6.83581	6.72841	7.45632	7.51456	7.11789
TADA1	5.36377	5.60795	5.16539	5.13703	5.53161	5.45458	5.37785	5.36258	5.49943	5.6084	5.27796	5.59857	5.58013	5.73077	5.54346	5.3438	5.21188	5.66138
BICD1	4.08424	4.90361	4.38921	4.97408	4.21747	4.7081	4.90925	4.8301	4.74032	4.65703	4.96877	4.36395	4.76305	4.62891	4.29071	4.5048	4.83179	4.95284
CHST10	7.90153	7.85464	7.62355	7.81047	7.73805	7.94114	7.85748	7.81844	7.83782	7.59203	7.86755	7.85417	7.65956	7.41913	8.18272	8.20538	7.81339	8.25117
EPHA5	5.45937	5.35956	6.04375	5.65698	6.17957	5.78723	5.85252	5.83274	5.91944	5.63858	6.00709	5.68053	5.86121	5.57256	5.25309	5.59502	6.08833	5.94103
HBP1	4.76301	4.69569	5.08624	4.94788	4.77137	4.79345	4.74005	5.26308	4.50115	4.96028	5.03831	4.90069	4.73199	4.52379	4.95316	4.87761	4.9841	5.40491
LOC100221217	6.07414	6.03104	5.98315	5.93412	5.99133	5.96403	5.95934	5.91765	5.98395	6.30564	6.22376	6.15899	6.04176	6.01738	5.88089	6.18647	5.89879	6.35957
LOC100229274	1.80031	1.6271	1.58132	2.08168	1.76585	1.7048	1.84481	2.20929	1.73488	1.63661	1.65704	2.29144	1.53732	1.61661	1.89969	2.14626	1.76742	2.04412
MSANTD4	5.03505	5.15003	5.07449	5.33617	4.81985	5.44366	5.35931	5.82158	5.17762	5.19468	5.6141	5.4404	5.24095	4.67847	4.91429	5.39095	5.09757	5.68284
PLAU	2.7465	2.58288	3.62328	2.99135	2.50287	2.92963	3.06627	3.51946	2.52755	2.73661	2.89369	2.88608	2.25481	3.22787	3.43559	2.85874	3.01171	3.93981
RBMX	7.24507	7.15016	7.01909	7.14804	7.00817	7.24777	7.21516	NA	7.15891	7.18426	7.11934	7.27479	7.14605	7.14529	7.08299	7.24228	7.13376	7.33594
SEL1L	5.61389	5.81314	5.61312	5.9653	5.48429	5.86516	5.96726	6.03139	5.70306	5.69398	5.94366	5.96064	5.87643	5.59922	5.34667	5.93279	5.89304	6.05326
UBE2W	5.2682	4.884	4.94615	5.00887	4.89758	5.29208	5.2503	4.91313	5.0229	5.10653	5.06561	5.29104	4.78615	5.06369	5.03129	5.15891	5.04005	5.44987
ZNF330	4.36542	4.74461	5.0127	4.77264	4.81633	4.85011	4.69487	4.78629	4.8845	4.32294	4.55587	4.50553	4.76716	4.92664	4.86754	4.41703	4.90831	5.34986
CLINT1	6.03122	5.80146	5.8846	5.96215	5.74265	6.07604	6.07307	6.04942	5.95084	5.85126	5.95496	6.0231	5.84634	5.797	5.75517	6.04526	5.98864	6.23877
GABRA1	7.41909	7.78583	7.81267	7.94263	7.53381	8.16429	8.35098	8.56918	7.89521	7.91269	8.17756	8.11302	7.8823	7.77785	7.11843	8.52126	8.35939	7.59221
LOC105758580	7.42006	6.98552	6.71015	7.09079	7.21804	7.51918	7.54985	6.84546	7.41393	7.07828	7.22178	7.43785	6.78048	7.2299	7.31523	7.22661	7.30125	7.37671
RANGAP1	7.03818	6.92077	6.95674	6.77878	7.15798	6.97633	6.98982	6.7422	7.23053	7.08516	6.80363	6.92774	7.09722	7.19207	6.982	7.02254	7.0338	7.15312
SLC9A9	2.32173	1.92346	2.3513	2.11291	1.8164	2.46776	2.63825	2.01534	2.43012	2.34006	2.46493	1.94968	2.18295	1.99206	2.12493	2.38855	2.05236	2.80362
STRN3	6.31061	6.13572	5.79722	6.31076	5.95698	6.18263	6.34512	6.25401	6.09181	6.21493	6.26234	6.2812	6.15679	6.02032	5.93031	6.48288	6.278	6.41358
BBS7	3.97583	3.32993	3.46426	3.72806	3.51455	3.89901	3.92969	4.1791	3.47823	3.3818	3.79462	3.94464	3.33718	3.6523	3.83057	3.73156	3.96141	3.91149
CBLL1	4.6951	4.85079	4.5944	5.01606	4.76109	4.80419	4.80146	5.00342	4.64619	4.8476	4.79183	4.91309	4.68718	4.86468	4.71093	4.83421	4.79917	5.04324
GRAMD3	3.5531	2.86153	3.43587	2.86634	3.23161	3.57206	3.58822	4.26999	3.78982	3.59035	3.46793	3.50017	3.29301	3.41155	2.69847	3.73263	3.51711	3.51724
LOC100218773	1.55233	0.85112	1.26403	0.825	0.987139	1.43095	1.64954	1.98821	1.03919	1.03964	0.873699	1.37549	1.17316	1.25697	1.46242	1.38633	1.68878	1.36505
LOC100226626	0.137304	1.34166	2.37711	1.57681	0.160157	2.51403	2.22648	2.13674	1.03133	0.986456	1.23501	1.36702	1.97602	1.93941	0.795547	1.46009	1.69884	1.84673
LOC105760366	2.88689	1.96405	2.73335	3.56871	2.31927	3.3231	3.44782	3.41029	1.31785	3.28023	2.94423	2.29917	1.81563	3.66301	2.67817	3.97371	3.54089	3.27538
USP40	4.74537	4.91944	5.14838	4.87696	5.18962	5.01092	4.79326	5.35372	4.77134	4.99352	5.14257	4.95234	4.93671	4.76349	4.87048	5.02588	4.91836	5.43988
CNOT8	3.27303	2.98252	3.14477	3.32681	3.83827	3.18193	2.77416	3.151	3.04669	3.55092	3.31752	3.60002	3.11987	3.1259	3.82174	3.02282	3.29257	3.71704
LOC100224667	NA	4.81837	5.02292	4.83885	5.18171	4.87846	4.85753	4.77554	4.99188	4.82467	4.8653	4.80235	4.91051	4.97423	5.16803	4.74584	4.92644	5.34811
LOC105759910	4.49317	3.48794	4.70391	3.89427	3.42698	4.45009	4.70759	4.7859	4.19057	NA	4.22872	4.26088	4.32778	3.67745	4.62524	4.50179	4.34855	4.40108
PLXNB2	4.89428	4.84089	5.15033	4.99666	5.06253	5.07431	5.14305	5.16195	4.83031	5.12082	5.5222	4.82709	4.87511	4.85925	4.77629	5.10796	5.20021	5.25464
SEC24B	4.65276	4.8786	4.82992	4.8916	4.70709	4.94827	4.87794	4.82104	4.74112	4.78627	5.00089	4.81854	4.80216	4.57916	4.65657	4.93229	4.9213	5.08107
TBC1D22A	4.4323	4.49973	4.82246	4.79954	4.52494	4.66579	4.89688	4.76056	4.47626	4.78237	4.82777	4.63247	4.66368	4.52118	4.35006	4.78766	4.61756	4.89758
CHUK	5.06239	5.18019	5.43925	5.18599	5.39869	5.13328	4.9856	NA	5.2834	5.22554	5.23452	5.45175	5.32752	5.3781	5.25478	4.99927	5.11779	5.66624
CZH9orf41	5.38254	6.07678	5.42095	6.23773	5.43801	6.03482	6.1741	6.54291	5.77547	6.12966	6.19507	6.3644	6.07823	5.95093	5.28336	6.41803	6.20187	5.59373
LOC100219370	4.66091	4.46905	4.39243	4.81952	4.47809	4.65331	4.56119	4.64239	4.50934	4.53316	4.66499	4.60975	4.53188	4.53707	4.43137	4.59289	4.69977	4.86685
OCRL	5.3404	5.60196	5.71826	5.51731	5.86422	5.53314	5.58944	5.34413	5.78248	5.96107	5.56256	5.48857	5.6525	5.67702	5.63467	5.39175	5.61877	5.92726
RALBP1	4.84855	4.40468	4.53198	4.76178	4.52809	4.57833	4.81112	4.4668	4.63781	4.37456	4.71154	4.45692	4.73059	4.4912	5.41102	4.94492	4.38135	5.06256
CEP70	2.98061	2.69735	3.70957	3.27443	3.58636	3.87803	3.24212	3.92617	2.72905	3.34603	3.0638	2.99677	3.04093	3.28998	3.46273	3.13487	2.91074	4.22294
CHPF	5.4397	5.44769	5.15411	5.24429	5.40726	5.27648	5.41105	4.8435	5.74158	5.64435	5.36948	5.29723	5.59515	5.90975	5.40789	5.29692	5.47041	5.66097
GGACT	7.49667	6.81147	7.13322	6.80103	6.6849	6.99033	7.04291	6.79034	7.03886	6.99891	7.30364	7.11319	7.1428	6.96721	7.44231	7.72288	7.07269	7.29802
LOC105759815	1.65523	2.46296	2.00359	2.65154	1.43542	2.68453	3.10541	2.28532	2.24491	2.11037	2.66788	1.34404	2.98818	3.24383	2.55963	1.66063	2.03697	2.9538
NR3C2	5.19831	5.29578	5.37851	5.58019	4.98127	5.43956	5.41268	5.44583	5.13864	5.39196	5.34038	5.38808	5.5168	5.17263	5.04354	5.46579	5.51324	5.64438
PCMT1	7.14702	7.03255	7.43937	7.25835	7.21723	7.24692	7.29709	7.44112	7.0711	7.03655	7.34787	7.11806	7.08124	7.00481	7.34374	7.42006	7.439	7.364
SEC22B	6.69609	6.87707	6.98721	6.58521	6.9798	6.7938	6.76395	6.68739	6.95587	6.88671	6.64774	6.82114	6.77937	6.95878	6.98523	6.72486	6.85606	7.15472
TIMM44	5.91455	5.64735	5.76203	5.62732	5.87124	5.93722	5.88254	5.71252	5.84498	5.76467	5.69986	5.66478	5.86987	5.9434	5.92683	NA	5.82988	NA
TVP23A	6.67434	6.69356	6.81511	6.95431	6.54493	6.67312	6.67942	7.21149	6.70081	6.80411	6.78506	7.0956	6.72175	6.668	6.81378	6.99963	NA	NA
WDFY1	4.85198	4.46595	4.9711	4.78144	4.68743	4.60204	4.71729	4.60156	4.75888	4.49917	4.87513	4.92448	4.6716	4.62578	5.10808	4.75433	4.78283	5.04075
YIPF5	6.81719	7.09487	7.05875	7.00492	6.79443	7.09798	7.07488	7.3397	7.08981	7.2275	6.8638	7.09712	7.27172	7.10765	7.15186	6.75354	6.90754	7.28727
COMMD10	6.37595	6.77006	6.56749	7.03465	6.60122	6.62481	6.69429	7.15577	6.66734	6.94591	7.01128	6.93141	6.88593	6.65162	6.66395	7.09007	6.90675	6.42025
DOK3	4.13449	4.84281	4.26915	4.3232	4.82963	4.57544	4.67156	4.15606	4.66963	4.78573	4.63174	4.50415	4.52804	4.8029	4.38278	4.03037	4.59469	5.15575
GMFB	NA	5.68324	5.94331	5.72929	5.62077	5.89423	5.76599	6.138	5.57214	5.846	5.96478	5.92703	5.91046	5.58421	5.45365	5.80855	5.72886	6.45153
LOC100226365	4.59243	5.55225	5.63175	4.61441	5.31572	5.16298	5.06062	5.51871	5.16586	5.79629	4.82872	5.09726	5.63364	5.6787	5.46573	5.14262	4.97702	5.7274
RAB8B	5.72891	5.84436	5.77186	6.04342	5.56607	5.94283	6.00131	6.0703	5.66667	5.60111	6.04165	6.13064	5.73994	5.68041	5.62207	6.1088	6.00874	6.0724
SCP2	6.85274	6.82454	6.93618	7.08875	6.35166	6.99356	6.8592	7.32789	6.90968	6.76226	7.17095	7.07206	6.82467	6.63265	6.80968	7.05874	6.92921	7.33198
GPR85	5.62866	5.75628	5.65877	5.98027	5.72233	5.88677	5.96411	5.89978	5.75682	5.77758	6.07911	5.761	5.86242	5.44762	5.48442	5.86922	5.78061	6.1672
IL12B	2.37689	1.93253	2.91017	2.39367	2.37504	2.2176	2.82734	2.62932	2.48272	1.95565	2.81324	2.949	2.23604	1.84164	2.61637	2.7334	2.43419	2.80426
KALRN	4.3963	4.38211	4.48182	4.79811	4.25335	4.68901	4.59243	4.54495	4.44434	4.71624	4.54121	4.5016	4.36656	4.50194	4.20682	4.3819	4.83943	4.8301
LOC100190340	6.48939	6.73199	6.54699	6.65356	6.75939	6.45944	6.74377	6.23175	6.52407	6.90522	6.48376	6.61733	6.58156	6.63537	6.85245	6.60215	6.6528	7.05918
LOC105759135	2.11256	2.32879	2.25598	2.18848	1.7634	2.25983	2.15188	2.73469	1.30542	1.73184	2.36951	2.85597	2.78523	2.13358	2.59652	2.37474	2.4972	2.52229
OSTC	5.98478	6.17736	5.8091	6.07107	6.10908	6.18849	5.93732	5.83063	6.18391	6.24586	6.10436	6.17839	6.26954	6.39576	5.7004	5.98487	6.04492	6.44165
THBS1	1.3625	1.55926	1.59052	1.2758	1.41487	1.41842	1.62324	1.38	1.70839	1.3159	1.10632	1.83357	1.47478	1.31259	1.69559	1.20929	1.50397	2.25449
UFL1	5.30373	5.25448	5.74488	5.34849	5.2417	5.2625	5.60732	5.71029	5.24627	5.13013	5.65531	5.81196	5.24271	5.22774	5.39419	5.79908	5.44907	5.63599
XXYLT1	5.0948	NA	5.2464	5.02556	5.21026	5.02951	5.05348	5.15073	5.26942	5.20221	5.12469	5.00663	5.30943	5.25244	5.32899	5.13785	5.19685	NA
ATP6AP2	8.57235	8.62166	8.4652	8.91238	8.6371	8.63422	8.63429	8.67061	8.4193	8.43815	8.87711	8.68721	8.56293	8.45184	8.60403	8.8617	8.69135	8.92721
CTR9	5.49016	5.3482	5.41268	5.5793	5.48539	5.30275	5.57682	5.37073	5.60466	5.46651	5.43284	5.44368	5.62913	5.13691	5.251	5.70155	5.60141	5.80106
DGKB	8.44256	8.4581	8.57048	8.78367	8.3278	8.61138	8.89339	8.84767	8.53617	8.43558	8.75145	8.75312	8.61853	8.5297	8.10066	8.72769	8.61989	8.86655
FERMT1	2.19075	1.78995	2.04698	2.42824	1.88015	NA	1.90131	2.07053	2.14042	2.05714	1.87234	2.1339	1.96502	2.04638	2.01343	2.50342	1.93326	2.58562
MAFK	NA	4.02357	3.49928	4.03973	3.79621	3.94564	4.26496	3.29999	4.01206	3.9915	3.84979	3.98292	3.95752	4.34599	3.72005	4.16836	4.19483	NA
MRPS18A	7.17851	7.28964	6.66377	7.0555	7.08626	7.30729	7.20809	6.8992	7.40893	7.50327	6.82273	7.20159	7.30122	7.77087	7.0526	7.34195	7.02018	7.36957
RBM48	3.13443	3.74896	3.74009	4.28727	4.01728	3.91954	3.52533	4.23323	3.14438	3.3523	3.70425	3.34574	3.6373	3.54063	3.98776	3.74003	4.05157	4.44604
TRA2A	6.77533	7.1724	7.07463	7.17025	6.74149	7.07372	7.11264	7.78975	6.87957	7.02102	7.3263	7.30976	7.02825	6.78031	6.86997	7.26035	7.19403	7.3886
WDR48	5.18512	5.14117	5.45652	5.42556	5.23242	5.21379	5.36857	5.68707	5.43546	5.29151	5.46698	5.23983	5.18308	5.09482	5.13672	5.27135	5.37268	5.73234
ZNF648	3.43313	3.94408	4.90498	4.68559	3.3671	4.73003	4.65552	4.28619	4.90756	4.99308	4.19967	4.81232	3.944	4.88595	3.53292	4.04399	3.73965	5.20698
FAM177A1	5.41011	5.64922	5.66488	5.78743	5.28194	5.72831	5.63108	5.5983	5.65364	5.57347	5.86414	5.53991	5.43115	5.67232	5.58428	5.55443	5.53221	6.01164
LOC100217927	5.98435	6.60916	6.61607	6.84934	6.66183	6.37133	6.85429	6.97942	6.48879	6.34447	6.75241	6.46298	6.28583	6.2589	6.3715	6.78194	6.94629	6.75837
LOC105759908	3.57505	2.81648	3.74432	2.79722	4.27909	3.90434	4.57737	4.60611	3.93222	3.45081	3.63199	2.58991	4.50189	4.21715	2.76104	4.30884	3.95677	3.51669
LOC105759925	3.43397	3.88439	3.18712	4.01654	2.84592	4.10489	3.74054	4.40012	3.814	3.83458	3.70108	4.07453	3.53941	3.54593	3.6489	3.95811	3.6949	3.89196
NOL9	6.23111	6.77678	6.61535	6.65419	6.72987	6.7977	6.57318	7.13146	6.71566	6.95953	6.73346	6.64593	6.74056	6.87626	6.45134	6.62055	6.78833	6.57335
PGGT1B	3.18655	3.67964	3.69518	3.89189	3.46425	3.80043	3.87083	3.8972	3.45319	3.91809	3.72154	3.40329	3.75658	3.43284	3.59235	3.79739	3.68499	3.7279
SOCS6	4.08387	4.24624	3.97488	4.25965	3.83551	4.11456	4.3536	4.27055	4.08813	4.12851	4.35411	3.99023	4.15253	4.07886	3.77517	4.25495	4.4547	4.55008
HELB	3.80494	3.87481	4.25838	4.06195	3.69805	4.2098	4.01493	4.75766	3.82291	3.58626	4.74559	4.09827	3.95573	3.57207	3.9344	4.22727	4.27967	4.38447
KCNT2	7.7659	7.46935	8.2235	7.62146	7.0316	8.03593	8.23024	7.85358	7.62289	7.81959	7.40806	8.00518	7.80188	7.89915	7.92649	7.71429	7.60645	8.37715
LOC100222349	4.7195	4.35999	3.48211	5.05525	3.24507	4.69873	4.71682	4.67276	4.18497	4.81992	3.50356	4.32164	5.44405	5.63481	4.00819	5.02764	4.62282	4.97879
PDZD11	6.04526	6.22382	6.27078	6.10917	6.20653	6.08836	6.1682	6.64891	6.51034	6.6262	5.73975	6.53601	6.21841	6.41602	6.12443	6.23912	6.1843	6.52208
TCIRG1	4.54925	4.79946	4.70813	4.47384	4.79741	4.75692	4.703	4.88093	4.97304	5.22258	4.63203	4.97257	4.95932	4.63782	4.58026	4.57256	4.60798	5.02426
ARHGAP10	3.68474	3.92489	4.86504	3.45061	3.99613	3.79998	4.38785	4.56844	3.7106	4.64228	4.05609	3.77885	4.20089	4.41095	4.04633	3.9319	3.75805	5.00156
ARMC8	5.60811	4.99306	5.22465	5.05017	5.11849	5.18357	5.15962	5.14146	5.14985	5.15374	5.09303	5.2954	5.37753	5.21042	5.2665	5.65392	5.18283	5.64002
C1GALT1	4.57949	4.39892	4.46856	4.65784	3.97544	4.57256	4.75157	4.68925	4.38136	4.32372	4.58926	4.33119	4.59667	4.55823	4.47168	4.51531	4.69155	4.82095
DYNC1LI1	7.01619	6.86713	6.71177	7.06019	6.82536	7.09259	6.99234	7.04458	6.92946	7.07606	7.1023	7.26005	6.87976	6.74926	6.70067	7.31377	7.01094	7.04791
LOC100221156	3.65254	3.93537	3.91739	3.93798	4.18489	3.71214	3.92159	3.51488	4.24955	4.1636	4.47078	3.98256	4.08443	4.26908	4.16562	3.78288	3.99117	3.79744
PLCG2	1.46347	1.51043	1.41186	1.27875	1.70632	1.81009	1.98457	2.04327	1.83187	1.09783	2.21991	1.21454	1.69567	1.79447	1.08517	1.53927	2.10726	1.70423
ATG7	4.25851	4.27809	4.35777	4.30976	4.57022	4.37189	4.20115	3.9818	4.3239	4.53524	4.25268	4.51167	4.49602	4.55233	4.44909	4.23441	4.2604	4.53534
CUL4B	5.51651	5.53158	5.67445	5.71096	5.5262	5.61546	5.74173	5.72883	5.45082	5.47368	5.6744	5.66726	5.53282	5.3372	5.42684	5.67121	5.7864	5.97007
CXCL14	8.92448	7.83923	7.24645	8.49926	7.71831	8.13346	8.11623	7.76925	8.3986	8.81514	8.16824	8.88276	8.59751	8.34153	7.8344	9.19959	8.43768	8.30926
IFT122	3.58859	3.83434	4.48099	3.98734	3.67679	3.7353	4.06053	4.40801	3.79114	4.00405	4.08709	4.13498	4.0698	3.49228	4.09941	4.07586	3.74956	4.50531
LOC100221285	2.90386	2.86279	3.18099	2.4944	3.05608	3.16444	3.17486	3.58283	3.43932	3.25914	2.4092	3.15955	3.68343	3.36261	3.1502	2.02833	3.1407	3.78034
LOC100223152	1.69401	0.602452	2.52251	1.96582	2.40728	3.57158	3.39918	3.74133	2.8826	0.897958	2.61083	1.37972	2.73503	2.1297	2.63407	1.42777	2.66736	1.66937
LOC100229843	2.75815	2.93367	2.86035	2.89786	3.26716	3.19319	2.73262	2.98226	2.6807	2.81839	3.09077	NA	3.41319	3.40512	2.60868	2.63377	3.12815	3.25138
LOC105760363	2.09966	1.54166	2.38488	2.07966	1.20215	2.80533	2.16445	3.29182	1.79667	1.45286	1.86864	2.81571	2.77832	1.14928	2.95478	2.89578	2.25328	2.0771
LRCH1	5.72474	5.70383	5.93221	5.94225	5.73971	5.77589	5.85077	6.06926	5.61242	6.04166	5.87202	6.01888	5.59697	5.73581	5.6605	6.30755	5.85888	5.98442
METTL16	5.94342	5.45461	5.45389	5.49973	5.45799	5.69098	5.67194	5.92543	5.53066	5.52655	5.83754	5.72067	5.6686	5.48892	5.86453	5.85883	5.57673	5.78272
NPTN	10.3516	10.4495	10.6408	10.7226	10.5895	10.5612	10.614	10.6527	10.3017	10.5885	10.5034	10.7994	10.4917	10.2721	10.544	10.6287	10.4681	10.8596
PAPSS2	1.48563	1.87777	2.31892	1.99047	1.06976	1.84704	2.17823	2.23093	1.56299	2.05906	1.94221	2.36381	1.77507	2.28129	1.48842	1.81897	2.26003	2.21715
RAB27A	5.40459	5.24018	5.12581	5.27335	4.77596	5.4425	5.29701	5.54612	5.27983	5.1559	5.6739	5.35841	5.4465	5.08391	4.79249	6.11285	5.30525	5.6279
ST3GAL5	6.30918	6.08146	6.04177	6.20089	6.05558	6.06789	6.11418	6.05468	5.81724	6.35736	6.42555	6.68873	5.97488	5.85566	6.27823	6.67005	6.23222	6.43019
INTS6	5.46292	5.35993	5.13396	5.39096	5.14675	5.31241	5.23039	5.80376	5.13224	5.77625	5.32481	5.57209	5.26896	5.42526	5.23346	5.57423	5.45543	5.64036
L3MBTL2	3.47648	3.7197	4.07305	3.69842	4.25484	3.82799	3.75577	3.41556	3.79496	3.86034	3.80239	3.58818	3.79502	3.61517	4.19322	3.6642	3.85043	4.23834
LOC101233310	1.42097	2.89601	1.90579	2.12425	1.98679	1.39257	1.61693	3.20255	2.71831	2.45886	2.57219	2.53078	2.29466	2.57012	2.10507	2.29198	2.40229	2.41262
PPM1B	7.18496	7.16076	6.86086	7.21898	6.85511	7.26976	7.30294	7.35818	7.03123	7.17484	7.23852	7.28275	7.0895	7.05771	6.88246	7.33688	7.22611	7.34787
PTPN13	5.23485	5.18962	5.3575	5.26509	4.89482	5.44325	5.46421	5.83763	5.263	5.49713	5.04762	5.19843	5.52104	5.23002	5.12175	5.30564	5.27381	5.69639
UGDH	5.21643	4.78633	4.62314	4.81308	4.63377	5.0697	4.82823	4.96837	4.63905	4.96122	5.10764	4.83024	5.00785	4.67757	4.97203	5.05845	5.0562	5.17701
ZFYVE27	5.51344	5.74134	5.69304	5.45511	5.73806	5.41259	5.48158	5.73581	5.88005	5.76892	5.425	5.63906	5.56567	5.87173	5.7484	5.62061	5.58606	5.99576
HPDL	2.72958	3.11723	2.74781	3.14727	3.32879	2.62414	2.8909	2.82097	3.6698	3.44141	3.27761	3.1431	3.19592	2.82391	3.34132	2.39346	3.08354	3.56918
KATNAL1	5.87077	5.74048	6.02494	6.00682	5.95332	5.73611	5.78437	5.97565	5.74707	5.85222	6.08834	5.82405	5.82326	5.74356	6.11024	5.98699	5.88347	6.15801
NCOA2	5.28137	5.46496	5.98907	5.79585	5.59599	5.61856	5.77337	5.89537	5.40355	5.35488	5.91755	5.52158	5.59332	5.3322	5.50634	5.63894	5.79294	6.03986
PUM2	5.98208	5.95898	6.13323	6.15831	5.68025	6.10342	6.18946	6.32901	5.8701	6.01933	6.21383	6.01274	5.97407	5.92897	5.75484	6.2546	6.18797	6.37995
RAB7A	8.73222	8.6352	8.89043	8.77789	8.57041	8.78373	8.83598	8.68297	8.65745	8.62206	8.73837	8.74416	8.76747	8.65413	8.76285	8.84238	8.74242	8.93775
RPAP2	4.4805	4.06981	4.19212	4.06322	3.86812	4.30218	4.12945	4.83314	3.85511	3.93145	4.35075	4.3587	4.34136	4.24371	4.09336	5.00866	4.28564	4.51253
UNC45A	5.09406	5.17196	4.79044	5.10415	5.34096	4.92851	5.10158	4.98413	5.33371	5.40894	5.00473	4.94408	5.17785	5.14898	4.89548	5.16704	5.14126	5.55453
CIRH1A	3.8829	4.35015	3.61579	4.10522	4.34228	4.14852	3.98517	3.77259	4.73779	4.45091	4.44456	4.11378	4.31549	4.43576	3.76645	4.12273	4.34088	4.16781
CLCC1	5.13754	4.75866	5.41033	4.74849	5.13947	5.33782	5.23879	4.87609	4.81572	4.63658	4.89697	5.14426	5.27392	5.31372	5.02413	5.09688	5.02324	5.56246
GJB1	3.8704	3.83582	3.80856	3.97118	NA	4.06638	3.28369	3.33387	4.2827	4.16001	3.59496	3.54413	3.91189	4.95419	4.4653	4.4175	3.92724	4.06157
GUCD1	5.97493	5.98815	NA	5.9974	5.98372	6.11189	6.02442	NA	6.08127	5.91324	6.2934	6.14105	5.90108	5.75833	6.21896	6.16309	6.08711	6.03817
LOC105759802	3.98461	3.68091	5.10481	4.01409	4.63088	4.55914	5.02277	4.91637	5.0601	2.83116	4.63981	3.27244	4.50165	4.52681	4.42499	4.92653	5.35934	4.43734
LOC105760452	4.5269	4.06287	4.27734	4.21839	4.23978	4.31539	4.33123	4.62647	4.19327	4.44109	4.69501	4.24107	4.19384	4.53406	4.5235	4.75101	4.74192	4.0035
POMT2	4.08349	4.58579	5.13125	4.84255	4.93568	4.91551	4.55373	5.13318	4.29963	4.67122	4.77041	4.5972	4.40083	4.67643	4.65383	4.48129	4.7294	5.37988
PPP6R3	5.44541	5.6217	5.76322	5.76644	5.45224	5.64476	5.77699	5.80871	5.5742	5.54793	5.84113	5.77371	5.60779	5.32149	5.46316	5.92572	5.6682	5.88975
UBLCP1	6.20149	5.50323	5.83786	5.46859	5.58152	5.74796	5.76435	5.84052	5.69206	5.49896	5.81104	6.12282	5.7807	5.63253	5.93372	6.09408	5.90694	6.08199
ARFGAP3	5.90366	5.33995	5.51021	5.92686	5.62368	5.96371	5.85992	5.95434	5.65004	6.06145	5.62529	6.15562	5.64428	5.70915	5.46605	5.96414	5.50567	5.9875
CRIP2	7.58068	8.40363	7.99552	8.01954	8.29599	8.05437	8.14313	8.05088	8.38166	8.28293	8.20899	8.11131	8.29444	8.1422	7.97166	7.67447	8.03021	8.54582
FRG1	5.56261	5.24452	5.29799	5.308	5.08522	5.31141	5.51052	5.82302	5.49438	5.48906	5.32044	5.71366	5.28079	5.28942	5.31158	5.56436	5.17873	5.82683
HAPLN4	5.35549	5.81568	6.21862	5.94485	6.12696	6.04683	5.86572	5.49368	6.40934	6.22183	6.04835	5.87738	6.414	6.44727	5.66324	5.92338	6.19503	5.61621
KIAA0232	7.64875	7.49921	7.82566	7.70396	7.41526	7.81268	7.90677	8.10315	7.58151	7.63977	7.76398	7.73715	7.78719	7.43399	7.49203	7.69485	7.67018	8.07575
LOC105760539	1.2553	1.55039	1.97961	1.33199	2.38617	2.32702	2.12149	1.51736	2.68553	1.62849	1.94482	2.1107	1.69326	NA	1.70369	0.841248	1.6506	2.48606
MAPK15	3.79798	3.38921	4.45459	3.67695	3.99464	3.67888	3.51607	4.67595	4.03143	3.57455	3.92843	3.60121	3.6974	3.96338	4.21024	3.84705	3.61773	4.69587
RPS6KA5	6.15923	6.17516	6.34579	6.48133	6.18535	6.29411	6.32523	6.3763	6.03707	6.30649	6.43275	6.27611	6.29962	5.97332	6.25772	6.41713	6.33142	6.49611
SNRK	5.3706	5.47739	5.57945	5.58065	5.3943	5.59081	5.74868	5.57538	5.56174	5.41032	5.84851	5.30947	5.50676	5.25324	5.37063	5.55346	5.72216	5.7644
WTAP	6.86904	6.73096	6.96092	6.79213	6.81401	6.92238	6.86979	7.09628	6.77411	6.77821	6.91416	6.90753	6.7584	6.70898	6.90819	6.95433	6.87582	6.99483
LOC100218379	5.8301	5.93358	6.33647	5.96647	5.92985	6.03697	6.0087	6.27318	5.75776	5.86058	6.14284	5.8971	5.98302	5.67315	6.07286	5.99799	6.20307	6.5003
LOC105759467	2.31322	2.24409	2.96454	2.45601	2.13806	2.40028	2.96702	2.43398	3.09635	2.22048	2.34085	2.42272	2.20929	2.24118	2.44746	2.67503	2.73862	3.0249
MRPS33	7.08854	6.77247	7.27634	6.65033	7.3596	7.08798	7.00494	7.41547	7.45213	6.8647	7.22462	7.19381	7.10881	7.30865	7.09889	6.72777	6.92576	7.41066
NFIA	4.1703	3.95948	4.0386	4.04651	3.76771	4.18293	4.37001	4.16342	4.08883	3.77988	4.00565	4.21332	3.87938	4.18075	3.90374	4.52017	4.123	4.28723
RPS20	8.73516	8.95235	8.78843	8.68178	8.81128	8.69802	8.67065	8.63025	8.87667	8.7084	8.69108	8.75604	9.05865	8.77168	8.82359	8.8249	8.87737	9.14759
SYT11	8.1662	7.90152	8.20088	8.12491	8.03016	8.21912	8.09373	8.2875	8.06659	8.01591	8.23907	8.19657	8.08983	7.8436	8.09695	8.26099	8.32201	NA
ABCD3	4.74866	4.76336	4.80535	4.83912	4.52102	4.95804	4.90031	4.79082	4.8257	4.66647	4.90067	4.76211	4.73238	4.66344	4.6265	4.88936	4.71465	5.21207
DDX41	6.25588	6.49362	6.27629	6.50896	NA	6.515	6.70578	6.46491	6.72372	6.65551	6.55549	6.07908	6.66609	6.81063	6.3936	6.18595	6.32249	6.74836
DDX47	6.03244	6.10525	6.17477	5.665	6.07218	6.17314	6.23458	5.68233	6.30041	6.19952	5.91176	6.16783	6.30595	6.39956	6.40241	5.96808	5.88072	6.29875
EXOC3	6.36892	6.32379	6.04689	6.26001	6.06838	6.3871	6.42681	6.49026	6.16784	6.25996	6.67448	6.57972	6.40499	5.95944	6.17771	6.5357	6.28617	6.49279
IQSEC1	6.64933	6.59482	6.8514	6.95181	6.63621	6.5975	6.65558	6.89981	6.67304	6.67415	6.95831	6.85164	6.4927	6.40211	6.64411	7.03701	7.13547	6.92425
LOC100222956	3.76117	3.88651	3.67921	4.16399	4.187	3.99757	3.68875	3.94916	4.05332	4.21394	3.86948	4.10158	4.09388	3.68302	3.75817	3.65294	3.8776	4.51051
LOC105759122	3.53676	3.33624	5.76281	4.31052	3.20282	3.51965	5.06422	4.29251	3.09129	3.88877	5.83997	4.99721	4.15924	4.89261	3.6237	5.10507	4.08609	4.4926
MMP9	4.16055	3.968	4.12978	3.46746	4.29958	4.05683	4.26847	3.70703	4.62585	4.1255	4.21353	3.69278	4.31874	4.58647	4.26501	4.17671	4.59828	3.89427
MTMR12	3.37498	3.63017	4.1146	3.77125	3.74304	3.69171	3.69205	4.04577	3.6775	3.91762	3.9851	3.99882	3.85582	3.48683	3.68387	4.16347	3.89413	3.55494
ARNTL	NA	3.93453	4.38742	3.76582	4.02984	4.28419	4.21421	4.47236	4.48286	4.4158	3.98611	3.64543	4.2545	4.55187	4.2012	4.13974	4.49276	4.11964
LOC100225211	4.83873	6.1995	5.94829	5.17684	6.35738	5.85558	5.5511	5.75467	6.27326	5.28516	5.34818	6.14062	6.37614	6.61449	5.07377	NA	5.83328	6.11372
NOC4L	4.23172	4.26773	4.76527	NA	4.92942	4.81359	4.4311	4.6045	4.78117	4.24007	4.40714	4.37708	4.57928	4.96373	4.8633	4.32291	4.7803	4.4247
NPAS3	3.95967	3.88301	4.04907	4.01731	3.97679	3.78838	3.9615	4.14569	3.95322	3.89795	4.19694	3.7834	4.11382	3.89293	3.66369	4.00775	4.14266	4.41818
SCAMP1	6.27273	6.71088	6.55494	6.98773	6.25688	6.78779	6.86115	6.7556	6.58775	6.96018	6.98603	6.70224	7.00767	6.66286	6.28297	7.07134	6.88378	6.4056
STX18	4.35104	4.12994	4.07919	4.77168	3.94493	4.04727	3.9459	4.16022	4.08333	4.24517	4.62782	4.51505	4.05557	4.29935	4.09457	4.58215	4.60251	4.61521
ZC3H14	4.71638	4.53935	4.52724	4.64504	4.43642	4.57993	4.60578	4.7421	4.58431	4.5298	4.50605	4.55411	4.54675	4.53176	4.67984	4.69255	4.60118	4.91041
BEND4	3.6512	3.80249	3.69271	3.94191	3.64102	4.00827	3.92498	4.09028	3.93037	3.70397	3.91121	3.67068	3.81308	3.83471	3.34804	4.12231	3.86273	4.02224
CPLX4	2.95296	2.21801	2.985	2.34021	2.22732	2.93952	2.8424	3.47557	2.61499	2.51216	2.82727	2.59256	2.40433	2.36397	3.09293	2.68702	2.87322	3.16682
DNPEP	6.5144	7.0225	6.88488	6.85512	7.0291	6.80463	6.81115	6.97658	6.98784	6.49019	6.72675	6.63852	6.79573	6.88661	7.03867	6.95556	6.8282	7.21498
MED31	7.19614	7.35569	7.0569	7.1617	7.27823	7.59297	7.26912	7.81589	7.39308	7.58406	7.24308	7.41129	7.50594	7.73253	7.21355	7.67068	7.22769	7.06179
MRPL35	4.9997	4.808	4.72708	4.5927	5.18278	4.77775	4.63986	4.67017	4.89733	5.05998	4.52431	4.76577	5.15506	5.05909	5.1923	4.96114	4.82126	5.13369
MTF2	3.78967	4.07774	3.80352	4.01288	3.6612	3.83348	4.12258	4.33142	3.46715	3.99762	4.27084	3.83016	4.00963	3.71849	3.76141	4.25173	3.96589	4.37637
PPP2R5C	6.17555	6.62401	5.99629	6.80042	6.15779	6.49385	6.74496	6.42879	6.29087	6.60968	6.81369	6.53433	6.53982	6.43408	5.81102	6.9568	6.6239	6.59286
RFNG	5.57523	5.71818	5.53241	5.63846	5.94782	5.8592	5.71879	5.50098	5.67069	5.91937	5.69242	5.71242	5.69429	5.90934	5.68522	5.71211	5.61523	NA
ACP6	4.58148	4.61954	4.23953	4.40003	4.76491	4.50386	4.31003	4.08931	4.69233	4.88309	4.39533	4.40465	4.90358	4.60855	4.48922	4.68957	4.56011	4.8914
ATM	3.58488	3.23688	3.05778	3.41851	3.48647	3.53054	3.41597	3.53949	3.26136	3.74163	3.47264	3.79552	3.2333	3.12552	3.22308	3.48271	3.44	3.75612
C23H1orf216	5.2494	5.11671	5.04291	5.35726	5.41805	5.26023	5.03382	4.48453	5.46089	5.55655	5.4039	5.70145	5.4674	5.29306	5.54095	5.36276	5.07115	NA
CFAP99	1.70061	1.32119	3.39516	1.74011	2.7338	3.06575	3.01237	3.27338	2.15877	2.11543	2.98031	2.91706	2.63921	2.57625	2.08413	1.01025	1.70276	3.28293
LOC100222492	3.38099	3.36347	3.62174	3.47184	3.04261	3.49553	3.43291	3.73973	3.56307	3.41763	3.1454	3.3306	3.5258	3.46464	3.35831	3.25043	3.56143	4.06269
LOC105759427	2.72428	3.14892	3.24455	2.75272	2.66107	2.81478	2.94507	3.69582	2.64408	3.22759	2.60877	2.57749	2.77454	2.79829	3.10625	3.33965	3.12544	3.92222
LSM6	6.39196	6.16965	6.02721	5.83806	6.26202	6.29845	6.16865	6.50139	6.37908	6.17788	6.26339	6.24393	6.06473	6.01857	6.50176	6.30364	6.10153	6.49076
ZWILCH	3.19034	3.42326	3.8645	3.41601	3.75917	3.34272	3.31396	3.59329	3.25404	3.22831	3.49586	3.34137	3.55835	3.18618	3.89707	3.40972	3.47145	4.14639
ARPC4	7.9447	8.19443	7.79549	7.86389	8.15726	8.01423	7.92557	7.93165	8.13578	8.19488	7.95105	8.09734	8.27829	8.36847	7.82177	7.94229	7.91005	8.34697
COX7A2	9.59134	9.58032	9.67506	9.55635	9.52868	9.60943	9.50659	9.89339	9.78101	9.96957	9.3503	9.91397	9.68382	9.70643	9.54015	9.64551	9.45135	9.97813
DEF8	5.20518	5.5206	5.61756	5.16865	6.0771	5.466	5.44571	5.41199	5.77583	5.48505	5.43453	5.50091	5.72694	5.87841	5.17353	5.10902	5.71617	5.95148
GALNT4	1.61059	1.55246	2.28407	2.00194	1.84496	1.57751	1.59582	1.7161	1.7355	1.89543	2.06917	1.85067	2.02907	1.71003	1.57343	1.93699	1.85181	2.21787
IGF2BP2	2.28379	2.85566	3.00189	3.00206	2.81566	2.53962	3.04333	3.43236	2.61896	2.68985	2.94649	3.25657	2.58244	2.7795	2.24494	2.83275	3.14862	3.25658
NPRL2	6.03291	6.33523	6.27928	6.39684	6.37593	6.32929	5.96122	6.61028	6.45378	6.33545	6.23407	6.46799	6.57415	6.15829	6.06325	6.19689	6.4465	6.50689
NSUN6	3.64335	4.397	4.46499	4.52958	4.33146	4.37777	4.35207	4.72431	3.74326	4.26998	4.55161	4.20516	4.43852	3.98046	4.14369	4.33481	4.23647	4.77006
PMS1	3.83733	3.78263	3.98622	4.11395	3.53117	3.44114	4.08452	4.2313	3.91122	4.23525	4.29654	3.86785	3.54862	3.4092	3.93599	4.30479	4.03583	4.39893
PRKAR1A	7.28027	7.38712	7.40002	7.62731	7.33093	7.79276	7.60211	7.58053	7.62852	7.69172	7.64885	7.57956	7.80623	7.62143	7.14273	7.74525	7.79511	7.10132
RALB	6.53408	6.20491	6.21431	6.43274	6.28958	6.26799	6.31423	6.3479	6.38933	6.42435	6.39198	6.49362	6.33685	6.35823	6.24853	6.50098	6.338	6.50195
TKT	7.26061	7.25668	7.64377	7.29889	7.25915	7.40442	7.26981	7.28589	7.36442	7.11285	7.43487	7.14385	7.20255	7.31149	7.21531	7.31866	7.75143	7.82641
UBE3A	6.28497	6.17648	5.90996	6.30981	6.10936	6.31372	6.40742	6.38945	6.16872	6.19908	6.26934	6.16065	6.2294	5.98643	6.04241	6.31928	6.31158	6.46453
ZBTB24	3.90885	4.11098	3.99402	4.28029	3.8552	3.85817	4.26282	4.04773	3.86301	3.9133	4.30968	4.23249	3.98887	3.94956	3.99071	4.22768	4.01663	4.34776
ABHD17C	5.29036	5.457	5.50925	5.75182	5.35821	5.57579	5.64993	5.52658	5.29476	5.32503	5.69788	5.33007	5.47978	5.11286	5.53972	5.78184	5.58324	5.73292
CAMLG	NA	6.26275	5.82658	6.10836	5.9597	6.19254	6.22178	6.30198	6.18125	6.41131	6.2711	6.04696	6.18866	6.34361	5.93948	6.00072	5.95737	6.57734
GNPTAB	3.92602	4.22761	4.16311	4.25691	4.0774	4.32965	4.43762	4.15044	4.25684	4.16109	4.47678	4.26481	4.43698	4.04676	3.78585	4.41659	4.13535	4.28228
LOC100190677	6.20882	6.26779	6.24011	5.92599	6.65324	6.15964	6.3514	5.97061	6.20088	NA	6.13971	6.25794	6.15645	6.31457	6.66176	6.19393	6.18693	6.61453
LOC101233349	6.70832	6.93322	6.67172	6.88026	6.83225	6.73981	6.79212	7.23933	6.92116	6.99023	7.30712	7.45457	6.95337	7.19983	6.72663	6.79474	6.59917	6.94692
NOP16	6.33351	6.57883	6.06991	6.21146	6.64053	6.7625	6.3964	6.64772	6.72775	6.42076	6.47982	6.71595	6.41611	7.13152	6.30563	6.33737	6.40409	6.46982
PHKB	6.22192	5.66883	6.09321	5.85695	5.76248	5.92575	5.96221	6.51831	5.80188	5.64181	6.0431	6.08712	5.87976	5.74394	5.95189	6.34361	6.12315	6.36328
ANKRD28	4.97242	4.97572	5.04495	5.27475	5.13216	5.21048	5.09496	5.44099	5.05794	4.77525	5.22789	5.13856	5.07494	4.72646	5.06629	5.10763	5.08135	5.48416
CPEB3	4.34379	4.6662	4.97705	5.07746	4.62115	4.67283	4.87166	4.95419	4.35217	4.59689	5.0821	4.82376	4.53231	4.1301	4.46997	5.09728	5.09421	5.25994
FARP2	5.01353	5.20971	4.91818	5.04172	5.33787	5.07817	5.01758	4.96223	5.02739	5.07637	5.11111	5.34587	4.97211	5.15519	5.49807	4.93653	5.10931	5.3096
LOC100232235	2.65562	2.64176	2.39495	3.1663	2.38938	2.44312	3.3041	2.56391	1.74515	3.20031	3.14366	2.77713	2.98317	3.03165	2.10507	3.10159	2.91611	3.23152
RPGR	3.46694	3.24496	3.34063	3.414	3.39467	3.83851	3.74745	4.24089	3.2717	3.60946	2.91359	3.22765	3.70194	2.81757	3.90878	3.55665	3.42202	4.10752
SLC30A9	6.00292	5.92779	6.04331	6.17539	6.02614	6.03445	6.20683	6.01637	6.05476	6.06571	6.17564	5.91529	5.94312	5.9835	5.75826	6.17619	6.20482	6.2631
USP32	4.99319	4.83849	5.07765	5.1146	5.05856	5.11016	5.18934	5.21073	4.92051	4.97995	5.16968	5.08181	5.081	4.9442	5.00246	5.05322	5.2856	4.90638
CDH18	4.56914	4.13703	4.7964	4.29217	4.4542	4.51769	4.65116	4.43565	4.18582	4.14901	4.31525	4.3419	4.36746	4.5283	4.51228	4.63906	4.52972	4.92513
FAM120A	7.15294	7.01657	6.88429	7.19481	6.89286	7.24184	7.26576	7.03814	7.02723	7.1407	7.18039	7.2174	7.17922	6.95397	6.87646	7.24393	7.12041	7.2032
GNPNAT1	5.15749	4.83307	4.62031	4.7473	4.8903	4.97591	4.97995	4.78353	5.15257	5.3541	4.70231	4.91594	5.02643	5.17059	4.81586	4.87101	4.81628	5.32082
LACE1	3.58189	3.58517	3.60225	3.85354	3.43842	3.61576	3.49409	3.79739	3.71916	3.67597	3.73674	3.55592	3.61612	3.41575	3.75229	3.50406	3.63878	4.0472
LOC100221345	4.46602	4.25206	3.93565	4.50628	3.95025	4.61486	4.5088	4.40308	4.34119	4.46603	4.58302	4.57127	4.56107	4.57268	4.32381	4.40211	4.45883	4.11579
LOC100221820	5.12181	3.48009	5.06769	NA	4.93813	5.3131	5.46234	4.88296	5.74361	4.69054	4.39181	4.95595	5.81028	5.81636	4.16467	4.4933	4.50737	5.11
LOC105758816	10.4703	11.0997	11.3559	10.9513	10.9498	10.8573	11.0232	11.215	11.5034	10.8784	10.8828	11.0506	11.3713	11.6517	10.4165	11.2253	11.4365	10.9664
PAPD5	4.26832	4.42914	4.28157	4.62375	4.23526	4.52259	4.54415	4.49226	4.23381	4.47682	4.60914	4.46892	4.33886	4.06475	4.49625	4.47173	4.3501	4.68163
PUS7L	2.30279	3.33846	2.97463	3.17869	3.16638	3.05505	3.12304	3.37398	2.70429	3.2936	2.99607	3.14689	2.81748	2.97864	2.50126	3.10651	3.01576	3.65446
SP3	4.84345	5.03279	4.58933	5.11336	4.66005	4.99538	5.0716	5.19468	4.71766	4.98716	5.14429	4.89439	4.99275	4.9755	4.57266	5.20828	5.02565	5.08237
UBE2B	5.20299	5.46387	5.50201	5.65485	4.96495	5.26744	5.60817	5.71633	5.64901	5.41399	5.95832	5.65144	5.56683	5.47709	5.43994	5.86603	5.53848	5.18228
FAM210A	5.17318	4.88361	4.97959	4.94945	4.96628	5.00927	5.21902	4.87252	4.61497	5.29364	5.02706	5.331	5.05597	4.99619	4.89816	5.21512	4.96704	5.35907
GDF7	1.91606	1.62207	1.45651	1.60031	1.30176	1.30594	1.73963	1.7903	1.80148	2.47729	1.98993	2.19353	2.1238	2.12457	1.05812	1.77353	1.94013	1.89036
LOC100221905	5.79291	5.32969	5.78521	5.77485	5.63625	5.69717	5.75154	5.81582	5.68875	5.38713	5.95651	5.86471	5.51718	5.41229	5.6784	5.93926	5.57624	5.9713
SH3GLB1	6.99745	6.97145	6.7754	6.92133	6.66708	6.86969	6.87264	6.94165	6.99761	7.02026	6.90223	6.94954	6.91363	6.83984	6.91159	6.99101	6.91213	7.17603
TTLL4	4.7555	4.88779	5.04701	4.56282	5.06843	4.97011	4.73186	5.16321	4.94775	4.72106	4.91682	4.76491	4.87575	4.89703	5.05448	4.61946	4.86031	5.35595
CSNK1A1	8.22256	7.97387	7.93819	8.1342	7.81677	8.11979	8.294	8.05975	8.04238	7.9587	8.17035	8.19862	8.05255	7.88877	8.00784	8.2158	8.05257	8.36684
FANCD2	1.92478	2.03686	NA	2.01188	1.91675	2.17276	1.87491	1.6675	1.91804	2.0699	2.08895	1.61351	2.03343	2.24585	1.98813	1.9668	2.07058	2.40261
ISPD	4.17297	3.89984	4.40063	4.46285	4.07849	4.25578	4.42971	4.27812	4.02115	4.31467	4.33947	4.36228	4.15534	4.14611	3.83356	4.51051	4.08144	4.61482
LOC100225003	8.91859	8.9475	8.88107	8.70608	8.98562	8.90302	8.74612	8.76781	9.05582	8.89738	8.77767	8.94775	9.04008	8.97183	9.02105	8.88823	8.79493	9.16503
LOC100231369	5.12095	4.69326	5.54408	3.93755	4.35181	5.36658	5.48196	5.27389	5.40059	5.00734	4.85174	5.30661	5.66252	5.51769	4.79812	4.51838	4.59541	5.77397
NOC3L	4.70768	4.67878	4.45207	4.80805	4.65806	4.77297	4.77836	4.87505	4.68676	4.62836	4.66844	4.96355	4.69495	4.45019	4.60694	4.74119	4.68372	4.94192
RCN2	7.74004	7.57304	7.76804	7.85342	7.62609	7.68441	7.77638	7.99523	7.61759	7.79079	7.9668	7.7069	7.52865	7.47571	7.67811	7.80662	7.86881	8.01289
ASAP2	4.20009	4.33537	4.12017	4.20477	4.01324	4.38187	4.5179	4.61203	4.05066	4.27187	4.4015	4.37615	4.08284	4.13912	4.01463	4.57215	4.39652	4.44728
COPS4	7.85233	7.96897	7.89999	7.71048	8.00674	7.86804	7.76377	7.80492	7.98769	7.81354	7.91303	7.87413	7.82679	7.96024	8.01568	7.77311	7.94416	8.15972
CTTN	7.89233	7.75609	7.74183	8.03822	7.84934	7.97222	8.1053	NA	7.66786	7.78277	7.84294	8.21704	7.81368	7.69723	7.79828	8.13748	7.78586	8.10521
LOC100223646	0.908146	0.339528	3.20327	0.960537	0.130492	2.96073	2.92052	0.0122633	2.74383	0.611175	0.134945	0.388318	2.7895	2.73393	3.18157	0.0156651	2.40496	2.38885
LOC100229252	2.23375	1.90714	1.43929	2.46144	1.28617	2.70572	2.14423	3.36114	1.83579	2.70791	1.68747	2.50865	2.07652	1.92684	2.39463	2.34851	2.53661	2.08998
LOC100231040	6.3461	6.95184	6.52067	6.84362	6.6651	6.73692	6.5057	6.28586	6.87422	6.76164	7.04349	6.58331	6.8376	7.06854	6.42843	6.54925	6.8512	6.9813
PPHLN1	4.70376	4.28283	4.07609	4.50863	4.34913	4.65946	4.35024	4.57633	4.10858	4.68159	4.82988	4.11439	4.44959	4.34527	4.3281	4.89566	4.59434	4.67956
RS1	1.67478	0.779039	0.917209	1.18561	1.54614	1.76549	1.57393	0.667633	2.03663	0.137343	0.955858	1.35797	1.68992	1.55981	1.13609	0.892926	1.21782	2.58221
TMEM115	NA	5.48243	5.14437	5.18816	5.35527	5.451	5.40595	5.36647	5.48005	5.31482	5.22639	5.19143	5.47724	5.61241	5.27944	5.04056	5.4266	5.77813
ADSL	5.61422	5.54888	5.38559	5.2505	5.58235	5.5739	5.43275	5.26922	5.788	5.46965	5.50406	5.35783	5.80652	5.8809	5.57471	5.34015	5.42557	5.911
COQ9	4.63358	4.72397	5.14871	4.33509	4.58039	4.75909	4.87303	4.86736	5.52449	4.29554	4.88256	4.62721	5.15004	4.93308	5.24287	4.8388	4.32108	5.1922
HYOU1	NA	6.65413	6.78377	7.00798	6.70078	6.9322	6.83617	6.87086	6.81951	6.73543	6.92183	6.82909	6.91865	6.62448	6.97448	6.82497	6.75761	NA
KCNRG	3.63359	3.91004	4.23011	4.05193	3.90737	3.95704	3.986	4.27397	3.83113	3.40706	4.44002	4.03038	4.0185	3.74522	3.79819	3.9331	4.07574	4.37142
KLHL2	8.85222	8.68789	9.09409	9.40581	8.78203	9.11011	9.27518	NA	8.79793	9.17342	9.1258	9.31626	8.83967	8.72593	8.60707	9.58669	9.09832	9.12162
PFKL	7.64427	7.33289	7.65226	7.46301	8.15312	7.58111	7.65297	7.20647	7.88685	7.65122	7.51203	7.45558	7.70075	7.53321	7.80775	7.35797	7.9118	7.91522
UBE3C	5.21576	5.22511	5.19079	5.29025	5.0927	5.31759	5.39023	5.39114	5.24374	5.13252	5.19949	5.33157	5.23794	5.00808	5.11124	5.24905	5.41995	5.47326
CCDC25	4.00207	4.30687	3.81129	4.36003	4.47769	4.47065	4.0438	4.78019	4.57467	4.0413	4.24054	4.69701	4.59923	4.77847	3.77694	3.88757	4.68337	4.23628
COPG1	7.04033	7.24642	7.12897	6.99628	7.29193	7.28423	7.24892	NA	7.29317	7.12347	7.05657	NA	7.31293	7.31321	7.15652	6.87761	7.16834	7.4169
CRADD	5.08536	4.92436	5.1642	4.69042	5.0149	5.35562	4.85808	4.94973	5.29401	5.3053	4.98914	5.03425	4.94992	5.10732	5.52106	5.3047	4.54127	5.39465
DSTN	10.7539	10.6106	10.486	10.5906	10.5007	10.5334	10.6488	10.5073	10.5214	10.4455	10.6298	10.644	10.5326	10.643	10.6276	10.7234	10.678	10.8906
ENTPD5	3.86029	3.84856	4.2358	3.97737	4.08291	3.90521	3.79627	4.19426	3.82496	4.05758	3.96603	4.03271	4.09167	3.74286	3.94125	4.11357	3.90975	4.33984
MTMR14	3.93905	4.41308	3.85775	4.01201	4.26617	3.9985	4.1508	3.79185	4.06937	4.43742	3.88578	4.19761	4.18194	4.44613	3.80118	4.04729	4.37651	4.59678
PXYLP1	3.47287	3.35068	3.79942	4.23639	3.51694	3.98475	3.95439	3.828	3.7996	3.58881	3.92567	3.47156	3.64527	3.74881	3.5041	3.47252	3.53126	4.26616
RAB12	5.98317	6.16792	6.08449	6.44196	6.02189	6.2063	6.20896	6.49473	6.09791	6.34494	6.28039	6.34933	6.19932	6.06338	5.82773	6.34853	6.12957	6.40451
SNCB	9.34502	9.77823	9.63836	9.56521	9.84917	9.56457	9.59008	9.47419	9.81346	9.40358	9.72844	9.62882	9.55971	9.58885	9.71804	9.24442	9.89804	10.046
ZNF365	6.62529	6.56086	6.26721	7.22033	6.71083	7.16771	7.00602	6.92443	6.53248	6.51033	7.11818	6.66603	6.57635	6.58775	6.35913	6.89919	6.77224	7.07831
ACOT11	3.76466	3.55936	4.39425	3.36309	4.5538	4.03869	4.04154	4.30731	4.25031	4.51326	3.95928	3.17026	4.40627	4.34463	3.57368	3.6303	4.23893	4.41683
BCL2	4.15031	4.07588	3.96733	4.23139	3.96907	3.83144	4.21307	4.40664	3.95917	3.45368	4.54612	3.81972	3.96831	3.9732	4.19174	4.51869	4.24003	4.61448
DLST	7.40314	7.69653	7.86989	7.52888	7.82982	7.84228	7.7179	7.59816	7.84173	7.81659	7.58266	7.56661	7.6708	7.85615	7.66878	7.57477	7.62047	7.85639
EZR	4.33777	4.20648	4.52627	4.08916	4.50449	4.11958	4.1248	4.21689	4.60442	4.11223	4.13833	4.41809	4.367	4.38338	4.56351	4.29408	4.31454	4.65946
GPR149	2.06543	3.09858	3.46857	2.2508	2.84343	2.82689	2.8052	2.69638	2.66116	2.47967	3.9015	2.41369	2.7895	2.75048	3.91714	2.79133	3.07138	2.89046
INPP4A	7.83823	7.62117	7.58252	7.92696	7.57609	7.9167	7.98065	7.91419	7.6047	7.67742	7.82068	8.09432	7.59255	7.52355	7.52558	8.05953	7.99614	7.91988
LOC100226309	4.98227	3.85724	5.37215	3.98939	4.42583	4.03829	4.38241	4.50055	5.04033	4.50757	4.46214	4.6219	4.71047	3.92333	5.87994	4.15334	4.72317	5.69797
LOC105759140	5.46657	5.48123	6.42776	6.18157	5.24345	6.59211	6.65615	7.05009	5.29435	4.78773	6.01908	4.98263	7.06208	6.27952	5.68439	5.7448	6.23519	6.71757
NONO	7.39065	7.35095	7.5896	7.57341	7.53596	7.54977	7.47883	7.71879	7.34222	7.42135	7.53659	7.47101	7.50128	7.51072	7.5897	7.13092	7.48467	7.87036
PMPCA	5.99952	6.21437	6.32174	6.00814	6.43682	6.71084	6.44818	6.37343	6.64041	6.44318	6.4981	5.99692	6.52659	6.43737	6.31619	6.05826	6.41564	6.07522
SDHAF4	5.41816	5.32891	5.26108	5.2574	5.11781	5.27901	5.44262	5.50316	5.05476	5.24433	5.41896	5.52051	5.17929	5.2079	5.51591	5.3318	5.38529	5.62039
SETD9	5.74338	5.96355	5.95515	5.9668	5.97139	6.12946	6.06577	NA	5.98753	6.11768	6.11195	6.16173	5.93627	5.85451	5.85122	6.12078	5.87725	5.87454
SUSD4	5.34923	5.95095	5.83716	6.23183	5.845	6.22425	5.99209	5.71717	5.90762	5.74973	5.91999	5.77702	5.33795	5.56169	5.80332	6.12404	6.02147	6.27537
C5H14orf166	7.72073	8.04169	7.77412	7.70069	7.9668	7.73245	7.7386	7.97551	8.04903	8.03397	7.78251	7.99134	8.03394	7.95864	7.80494	7.57691	7.83788	8.26679
CDK5RAP1	4.96761	5.14618	4.96118	4.89382	5.02622	5.2073	5.13803	5.23989	5.47249	5.16125	5.19425	4.94595	5.44993	5.16335	5.18861	5.2189	5.25083	4.7584
LOC100218933	2.34076	1.62811	1.84188	1.61131	1.54336	1.91739	2.31247	1.72857	3.0115	2.07294	1.9163	1.51048	2.05053	2.4393	2.13865	1.76778	1.38998	3.01068
LOC100220969	1.43336	1.70681	2.93194	1.63672	2.10304	2.19151	2.37514	1.92947	1.96106	1.82127	2.35274	1.45691	2.08253	1.31796	2.38583	2.36841	2.21538	2.25769
LOC100229719	4.78966	4.98842	5.44988	4.98786	5.77874	5.14322	5.11439	5.64449	5.34101	5.28816	4.93252	4.95437	5.28165	5.22617	4.88494	4.83816	5.12234	5.90063
LOC105759144	1.95587	1.94066	0.828081	2.27795	1.46388	2.6811	2.03773	2.21898	2.35567	1.64558	1.55817	2.17892	2.20465	1.87251	1.61654	2.05347	2.67611	1.77065
NDUFV1	8.43264	8.79349	8.44408	8.51953	8.60549	8.64788	8.60856	8.18253	8.78842	8.80616	8.58114	8.52415	8.69948	8.79845	8.43634	8.45169	8.67919	8.94678
NEBL	5.64526	5.5349	5.73941	6.06171	5.43055	5.66565	6.00257	5.91596	5.51576	5.54007	5.79209	5.75737	5.53696	5.66787	5.7304	5.88972	5.70852	5.95467
NUP107	4.8178	4.59223	4.82125	4.64899	4.6703	4.67594	4.68637	4.76594	4.4692	4.38249	5.09691	4.86139	4.56375	4.51892	4.73584	4.88448	4.72238	5.22473
ATAD5	1.18911	1.41456	2.02191	1.24254	1.44794	1.78003	1.63883	1.65121	1.41587	1.35058	1.7778	1.56832	1.45228	1.31362	1.60259	1.35888	1.52292	1.80661
C3H6orf120	4.21341	4.38507	4.49864	4.31908	4.35786	4.27663	4.29344	4.42244	4.43906	4.17203	4.42894	4.27606	4.25819	4.03609	4.97813	4.36766	4.22772	4.83104
[truncated: 5,463 more rows]
