# Supplementary material for: FoxP2 isoforms delineate spatiotemporal transcriptional networks for vocal learning in the zebra finch
Source: eLife journal article supplement (doi:10.7554/elife.30649), 2018-01-23
Supplement: supp [file elife-30649-supp-v1.zip]

pcDNA4/HisMax-tFoxP2

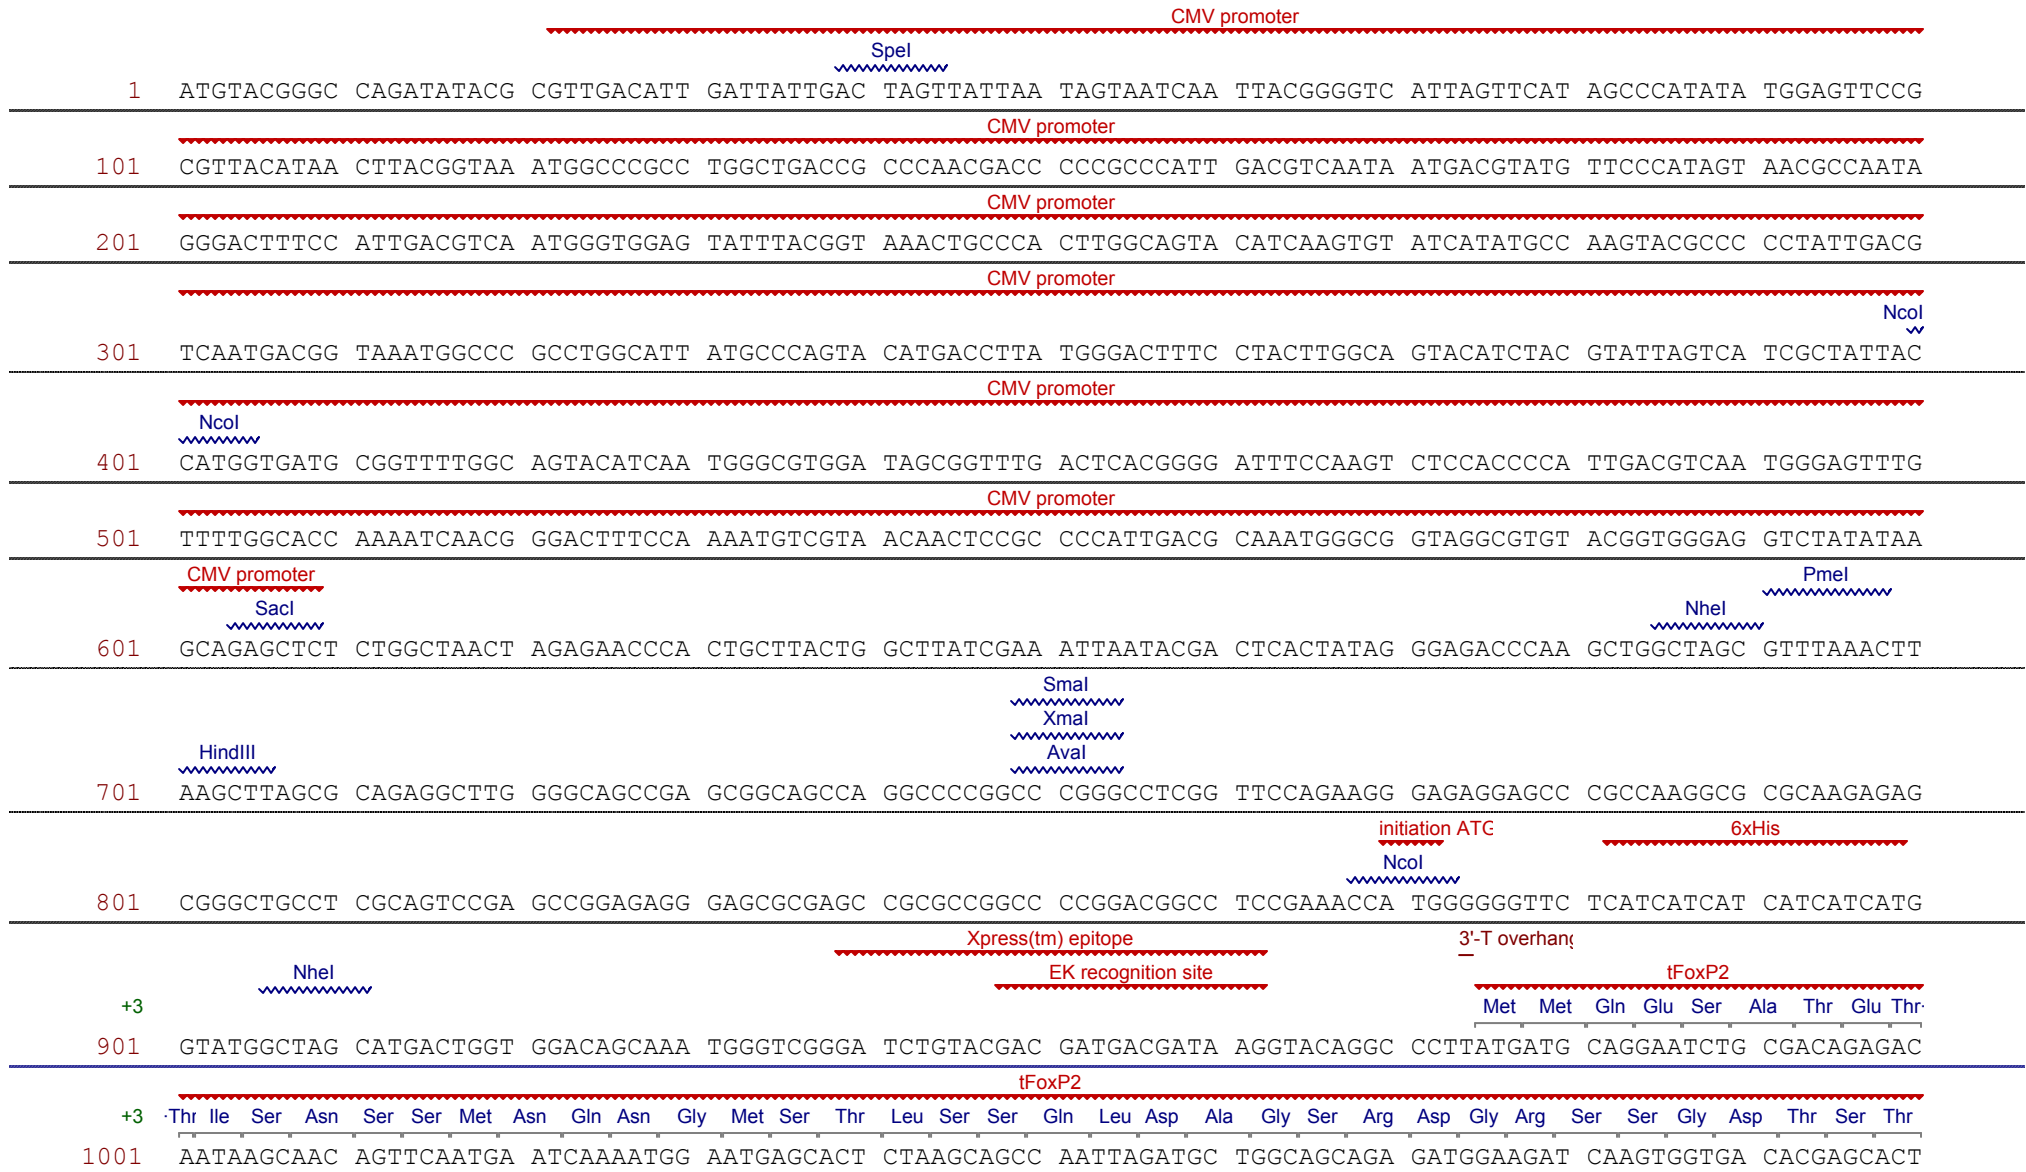

pcDNA4/HisMax-tFoxP2

|      |            |            |            |            |            |            |            |              |             |            |     |     |     |     |     |     |     |     |     |     |     |     |     |     |     |     |     |     |     |     |     |     |     |     |     |     |
|------|------------|------------|------------|------------|------------|------------|------------|--------------|-------------|------------|-----|-----|-----|-----|-----|-----|-----|-----|-----|-----|-----|-----|-----|-----|-----|-----|-----|-----|-----|-----|-----|-----|-----|-----|-----|-----|
|      |            |            | tFoxP2     |            |            |            |            |              |             |            |     |     |     |     |     |     |     |     |     |     |     |     |     |     |     |     |     |     |     |     |     |     |     |     |     |     |
|      |            |            | PvuII      |            |            |            |            |              |             |            |     |     |     |     |     |     |     |     |     |     |     |     |     |     |     |     |     |     |     |     |     |     |     |     |     |     |
| +3   | Glu        | Val        | Ser        | Thr        | Val        | Glu        | Leu        | Leu          | His         | Leu        | Gln | Gln | Gln | Gln | Ala | Leu | Gln | Ala | Ala | Arg | Gln | Leu | Leu | Gln | Gln | Gln | Thr | Ser | Gly | Leu | Lys | Ser | Pro |     |     |     |
| 1101 | GAAGTAAGCA | CAGTAGAACT | GCTGCATCTG | CAACAACAGC | AGGCACTCCA | GGCAGCAAGG | CAGCTGCTTT | TACAGCAACA   | GACAAGTGGA  | CTGAAATCTC |     |     |     |     |     |     |     |     |     |     |     |     |     |     |     |     |     |     |     |     |     |     |     |     |     |     |
|      |            |            | tFoxP2     |            |            |            |            |              |             |            |     |     |     |     |     |     |     |     |     |     |     |     |     |     |     |     |     |     |     |     |     |     |     |     |     |     |
|      |            |            | PstI       |            |            |            |            |              |             |            |     |     |     |     |     |     |     |     |     |     |     |     |     |     |     |     |     |     |     |     |     |     |     |     |     |     |
| +3   | Pro        | Lys        | Gly        | Ser        | Glu        | Lys        | Gln        | Arg          | Pro         | Leu        | Gln | Val | Pro | Val | Ser | Val | Ala | Met | Met | Thr | Pro | Gln | Val | Ile | Thr | Pro | Gln | Gln | Met | Gln | Gln | Ile | Leu | Gln |     |     |
| 1201 | CTAAGGGCAG | TGAGAAACAG | AGACCGCTGC | AGGTGCCTGT | GTCAGTGGCC | ATGATGACTC | CCCAGGTGAT | CACCCCTCAG   | CAAATGCAGC  | AGATTCTCCA |     |     |     |     |     |     |     |     |     |     |     |     |     |     |     |     |     |     |     |     |     |     |     |     |     |     |
|      |            |            | tFoxP2     |            |            |            |            |              |             |            |     |     |     |     |     |     |     |     |     |     |     |     |     |     |     |     |     |     |     |     |     |     |     |     |     |     |
| +3   | Gln        | Gln        | Gln        | Val        | Leu        | Ser        | Pro        | Gln          | Gln         | Leu        | Gln | Ala | Leu | Leu | Gln | Gln | Gln | Gln | Ala | Val | Met | Leu | Gln | Gln | Gln | Gln | Gln | Leu | Gln | Glu | Phe | Tyr | Lys | Lys | Gln |     |
| 1301 | GCAGCAAGTG | TTGTCTCCGC | AGCAGCTTCA | AGCACTTCTC | CAGCAGCAGC | AAGCAGTTAT | GTTGCAGCAG | CAACAACACTAC | AAGAGTTTTTA | CAAGAAACAG |     |     |     |     |     |     |     |     |     |     |     |     |     |     |     |     |     |     |     |     |     |     |     |     |     |     |
|      |            |            | tFoxP2     |            |            |            |            |              |             |            |     |     |     |     |     |     |     |     |     |     |     |     |     |     |     |     |     |     |     |     |     |     |     |     |     |     |
| +3   | Gln        | Glu        | Gln        | Leu        | His        | Leu        | Gln        | Leu          | Leu         | Gln        | Gln | Gln | Gln | Gln | Gln | Gln | Gln | Gln | Gln | Gln | Gln | Gln | Gln | Gln | Gln | Gln | Gln | Gln | Gln | Gln | Gln | Gln | Gln | Gln | Gln |     |
| 1401 | CAAGAGCAGT | TACATCTTCA | GCTTTTGCAG | CAGCAGCAGC | AACAGCAGCA | GCAACAGCAA | CAACAGCAGC | AACAACAGCA   | ACAACAGCAG  | CAGCAGCAAC |     |     |     |     |     |     |     |     |     |     |     |     |     |     |     |     |     |     |     |     |     |     |     |     |     |     |
|      |            |            | tFoxP2     |            |            |            |            |              |             |            |     |     |     |     |     |     |     |     |     |     |     |     |     |     |     |     |     |     |     |     |     |     |     |     |     |     |
| +3   | Gln          | Gln         | Gln        | Gln | Gln | Gln | Gln | His | Pro | Gly | Lys | Gln | Ala | Lys | Glu | Gln | Leu | Ala | Ala | Gln |
| 1501 | AACAACAACA | GCAGCAGCAG | CAACAGCAAC | AGCAGCAACA | GCATCCAGGA | AAGCAAGCAA | AAGAGCAACA | GCAGCAGCAG   | CAGCAGCAGT  | TGGCAGCCCA |     |     |     |     |     |     |     |     |     |     |     |     |     |     |     |     |     |     |     |     |     |     |     |     |     |     |
|      |            |            | tFoxP2     |            |            |            |            |              |             |            |     |     |     |     |     |     |     |     |     |     |     |     |     |     |     |     |     |     |     |     |     |     |     |     |     |     |
|      |            |            | MscI       |            |            |            |            |              |             |            |     |     |     |     |     |     |     |     |     |     |     |     |     |     |     |     |     |     |     |     |     |     |     |     |     |     |
| +3   | Gln        | Gln        | Leu        | Val        | Phe        | Gln        | Gln        | Gln          | Leu         | Leu        | Gln | Met | Gln | Gln | Leu | Gln | Gln | Gln | Gln | His | Leu | Leu | Asn | Leu | Gln | Arg | Gln | Gly | Leu | Ile | Ser | Ile | Pro | Pro |     |     |
| 1601 | GCAGCTTGTC | TTCCAGCAGC | AGCTCCTCCA | GATGCAACAA | CTTCAGCAGC | AGCAACATCT | GCTGAACCTT | CAGCGTCAGG   | GACTCATTTT  | CATCCCACCT |     |     |     |     |     |     |     |     |     |     |     |     |     |     |     |     |     |     |     |     |     |     |     |     |     |     |
|      |            |            | tFoxP2     |            |            |            |            |              |             |            |     |     |     |     |     |     |     |     |     |     |     |     |     |     |     |     |     |     |     |     |     |     |     |     |     |     |
|      |            |            | MscI       |            |            |            |            |              |             |            |     |     |     |     |     |     |     |     |     |     |     |     |     |     |     |     |     |     |     |     |     |     |     |     |     |     |
| +3   | Gly        | Gln        | Ser        | Ala        | Leu        | Pro        | Val        | Gln          | Ser         | Leu        | Pro | Gln | Ala | Gly | Leu | Ser | Pro | Ala | Glu | Ile | Gln | Gln | Leu | Trp | Lys | Glu | Val | Thr | Gly | Val | His | Ser | Met | Glu |     |     |
| 1701 | GGCCAATCTG | CTCTTCCTGT | CCAGTCTCTG | CCACAAGCTG | GCTTAAGTCC | TGCTGAGATT | CAGCAGTTAT | GGAAAGAAGT   | GACTGGAGTT  | CACAGTATGG |     |     |     |     |     |     |     |     |     |     |     |     |     |     |     |     |     |     |     |     |     |     |     |     |     |     |
|      |            |            | tFoxP2     |            |            |            |            |              |             |            |     |     |     |     |     |     |     |     |     |     |     |     |     |     |     |     |     |     |     |     |     |     |     |     |     |     |
| +3   | Glu        | Asp        | Asn        | Gly        | Ile        | Lys        | His        | Gly          | Gly         | Leu        | Asp | Leu | Thr | Thr | Asn | Asn | Ser | Ser | Ser | Thr | Thr | Ser | Ser | Thr | Thr | Ser | Lys | Ala | Ser | Pro | Pro | Ile | Thr | His |     |     |
| 1801 | AAGACAATGG | CATTAAACAT | GGAGGGCTAG | ACCTCACTAC | TAACAATTCC | TCCTCTACTA | CCTCCTCCAC | CACTTCCAAA   | GCATCACCAC  | CAATAACTCA |     |     |     |     |     |     |     |     |     |     |     |     |     |     |     |     |     |     |     |     |     |     |     |     |     |     |
|      |            |            | tFoxP2     |            |            |            |            |              |             |            |     |     |     |     |     |     |     |     |     |     |     |     |     |     |     |     |     |     |     |     |     |     |     |     |     |     |
| +3   | His        | His        | Ser        | Ile        | Val        | Asn        | Gly        | Gln          | Ser         | Ser        | Val | Leu | Asn | Ala | Arg | Arg | Asp | Ser | Ser | Ser | His | Glu | Glu | Thr | Gly | Ala | Ser | His | Thr | Leu | Tyr | Gly | His | Gly |     |     |
| 1901 | TCATTCCATA | GTGAATGGAC | AGTCTTCAGT | TCTAAATGCA | AGGCGAGACA | GCTCGTCACA | TGAGGAGACT | GGGGCCTCCC   | ATACTCTCTA  | TGGTCATGGA |     |     |     |     |     |     |     |     |     |     |     |     |     |     |     |     |     |     |     |     |     |     |     |     |     |     |

pcDNA4/HisMax-tFoxP2

|      |            |                     |             |             |            |            |             |             |             |             |     |     |     |     |     |     |     |     |     |     |     |     |     |     |     |     |     |     |     |     |     |     |     |     |
|------|------------|---------------------|-------------|-------------|------------|------------|-------------|-------------|-------------|-------------|-----|-----|-----|-----|-----|-----|-----|-----|-----|-----|-----|-----|-----|-----|-----|-----|-----|-----|-----|-----|-----|-----|-----|-----|
|      |            | tFoxP2              |             |             |            |            |             |             |             |             |     |     |     |     |     |     |     |     |     |     |     |     |     |     |     |     |     |     |     |     |     |     |     |     |
| +3   | Val        | Cys                 | Lys         | Trp         | Pro        | Gly        | Cys         | Glu         | Ser         | Val         | Cys | Glu | Asp | Phe | Gly | Gln | Phe | Leu | Lys | His | Leu | Asn | Asn | Glu | His | Ala | Leu | Asp | Asp | Arg | Ser | Thr | Ala | Gln |
| 2001 | GTTTGCAAAT | GGCCTGGCTG          | TGAAAGCGTT  | TGTGAAGATT  | TTGGACAATT | TTTAAAGCAC | CTTAACAATG  | AACATGCATT  | GGATGACAGA  | AGCACTGCTC  |     |     |     |     |     |     |     |     |     |     |     |     |     |     |     |     |     |     |     |     |     |     |     |     |
|      |            | tFoxP2              |             |             |            |            |             |             |             |             |     |     |     |     |     |     |     |     |     |     |     |     |     |     |     |     |     |     |     |     |     |     |     |     |
| +3   | Gln        | Cys                 | Arg         | Val         | Gln        | Met        | Gln         | Val         | Val         | Gln         | Gln | Leu | Glu | Ile | Gln | Leu | Ser | Lys | Glu | Arg | Glu | Arg | Leu | Gln | Ala | Met | Met | Thr | His | Leu | His | Met | Arg | Pro |
| 2101 | AGTGTCGGGT | GCAAATGCAA          | GTGGTTCAGC  | AGTTAGAAAT  | ACAGCTTTCT | AAAGAACGCG | AACGTCTTCA  | AGCAATGATG  | ACCACTTGC   | ACATGCGACC  |     |     |     |     |     |     |     |     |     |     |     |     |     |     |     |     |     |     |     |     |     |     |     |     |
|      |            | tFoxP2              |             |             |            |            |             |             |             |             |     |     |     |     |     |     |     |     |     |     |     |     |     |     |     |     |     |     |     |     |     |     |     |     |
| +3   | Pro        | Ser                 | Glu         | Pro         | Lys        | Pro        | Ser         | Pro         | Lys         | Pro         | Val | Ser | Ala | Tyr | Cys | Phe | Ile | Asn | Ser | Lys | *** |     |     |     |     |     |     |     |     |     |     |     |     |     |
| 2201 | CTCGGAGCCC | AAGCCATCTC          | CAAAACCTGT  | AAGTGCATAT  | TGCTTTATAA | ACAGTAAATA | GGTCTACGAA  | GGGCTGTAC   | CTAGGATCCA  | GTGTGGTGGA  |     |     |     |     |     |     |     |     |     |     |     |     |     |     |     |     |     |     |     |     |     |     |     |     |
|      |            | 3'-T overhang       |             |             |            |            |             |             |             |             |     |     |     |     |     |     |     |     |     |     |     |     |     |     |     |     |     |     |     |     |     |     |     |     |
|      |            |                     |             |             |            |            |             |             |             |             |     |     |     |     |     |     |     |     |     |     |     |     |     |     |     |     |     |     |     |     |     |     |     |     |
|      |            |                     |             |             |            |            |             |             |             |             |     |     |     |     |     |     |     |     |     |     |     |     |     |     |     |     |     |     |     |     |     |     |     |     |
| 2301 | ATTCTGCAGA | TATCCAGCAC          | AGTGGCGGCC  | GCTCGAGTCT  | AGAGGGCCCG | TTTAAACCCG | CTGATCAGCC  | TCGACTGTGC  | CTTCTAGTTG  | CCAGCCATCT  |     |     |     |     |     |     |     |     |     |     |     |     |     |     |     |     |     |     |     |     |     |     |     |     |
| 2401 | GTTGTTTGCC | CCTCCCCCGT          | GCCTTCCTTG  | ACCCTGGAAG  | GTGCCACTCC | CACTGTCCTT | TCCTAATAAA  | ATGAGGAAAT  | TGCATCGCAT  | TGTCTGAGTA  |     |     |     |     |     |     |     |     |     |     |     |     |     |     |     |     |     |     |     |     |     |     |     |     |
| 2501 | GGTGTCAATC | TATTCTGGGG          | GGTGGGGTGG  | GGCAGGACAG  | CAAGGGGGAG | GATTGGGAAG | ACAATAGCAG  | GCATGCTGGG  | GATGCGGTGG  | GCTCTATGGC  |     |     |     |     |     |     |     |     |     |     |     |     |     |     |     |     |     |     |     |     |     |     |     |     |
|      |            |                     |             |             |            |            |             |             |             |             |     |     |     |     |     |     |     |     |     |     |     |     |     |     |     |     |     |     |     |     |     |     |     |     |
| 2601 | TTCTGAGGCG | GAAAGAACCA          | GCTGGGGGCTC | TAGGGGGTAT  | CCCCACGCGC | CCTGTAGCGG | CGCATTAAGC  | GCGGCGGGTG  | TGGTGGTTAC  | GCGCAGCGTG  |     |     |     |     |     |     |     |     |     |     |     |     |     |     |     |     |     |     |     |     |     |     |     |     |
| 2701 | ACCGCTACAC | TTGCCAGCGC          | CCTAGCGCCC  | GCTCCTTTTCG | CTTTCTTTCC | TTCTTTTCTC | GCCACGTTTCG | CCGGCTTTCC  | CCGTCAAGCT  | CTAAATCGGG  |     |     |     |     |     |     |     |     |     |     |     |     |     |     |     |     |     |     |     |     |     |     |     |     |
| 2801 | GGCTCCCTTT | AGGGTTCCGA          | TTTAGTGCTT  | TACGGCACCT  | CGACCCCAA  | AACTTGATT  | AGGGTGATGG  | TTACGTAAGT  | GGGCCATCGC  | CCTGATAGAC  |     |     |     |     |     |     |     |     |     |     |     |     |     |     |     |     |     |     |     |     |     |     |     |     |
| 2901 | GGTTTTTCGC | CCTTTGACGT          | TGGAGTCCAC  | GTTCTTTAAT  | AGTGGACTCT | TGTTCCAAAC | TGGAACAACA  | CTCAACCCTA  | TCTCGGTCTA  | TTCTTTTGAT  |     |     |     |     |     |     |     |     |     |     |     |     |     |     |     |     |     |     |     |     |     |     |     |     |
|      |            |                     |             |             |            |            |             |             |             |             |     |     |     |     |     |     |     |     |     |     |     |     |     |     |     |     |     |     |     |     |     |     |     |     |
| 3001 | TTATAAGGGA | TTTTGCCGAT          | TTCGGCCTAT  | TGGTTAAAAA  | ATGAGCTGAT | TTAACAAAAA | TTTAACGCGA  | ATTAATTCTG  | TGGAATGTGT  | GTCAGTTAGG  |     |     |     |     |     |     |     |     |     |     |     |     |     |     |     |     |     |     |     |     |     |     |     |     |
|      |            | SV40 early promoter |             |             |            |            |             |             |             |             |     |     |     |     |     |     |     |     |     |     |     |     |     |     |     |     |     |     |     |     |     |     |     |     |
| 3101 | GTGTGGAAG  | TCCCCAGGCT          | CCCAGCAGG   | CAGAAGTATG  | CAAAGCATGC | ATCTCAATTA | GTCAGCAACC  | AGGTGTGGAA  | AGTCCCCAGG  | CTCCCCAGCA  |     |     |     |     |     |     |     |     |     |     |     |     |     |     |     |     |     |     |     |     |     |     |     |     |
|      |            | SV40 early promoter |             |             |            |            |             |             |             |             |     |     |     |     |     |     |     |     |     |     |     |     |     |     |     |     |     |     |     |     |     |     |     |     |
| 3201 | GGCAGAAGTA | TGCAAAGCAT          | GCATCTCAAT  | TAGTCAGCAA  | CCATAGTCCC | GCCCCTAACT | CCGCCCCATCC | CGCCCCCTAAC | TCCGCCCCAGT | TCCGCCCCATT |     |     |     |     |     |     |     |     |     |     |     |     |     |     |     |     |     |     |     |     |     |     |     |     |
|      |            | SV40 early promoter |             |             |            |            |             |             |             |             |     |     |     |     |     |     |     |     |     |     |     |     |     |     |     |     |     |     |     |     |     |     |     |     |
|      |            |                     |             |             |            |            |             |             |             |             |     |     |     |     |     |     |     |     |     |     |     |     |     |     |     |     |     |     |     |     |     |     |     |     |
| 3301 | CTCCGCCCCA | TGGCTGACTA          | ATTTTTTTTTA | TTTATGCAGA  | GGCCGAGGCC | GCCTCTGCCT | CTGAGCTATT  | CCAGAAGTAG  | TGAGGAGGCT  | TTTTTGGAGG  |     |     |     |     |     |     |     |     |     |     |     |     |     |     |     |     |     |     |     |     |     |     |     |     |

pcDNA4/HisMax-tFoxP2

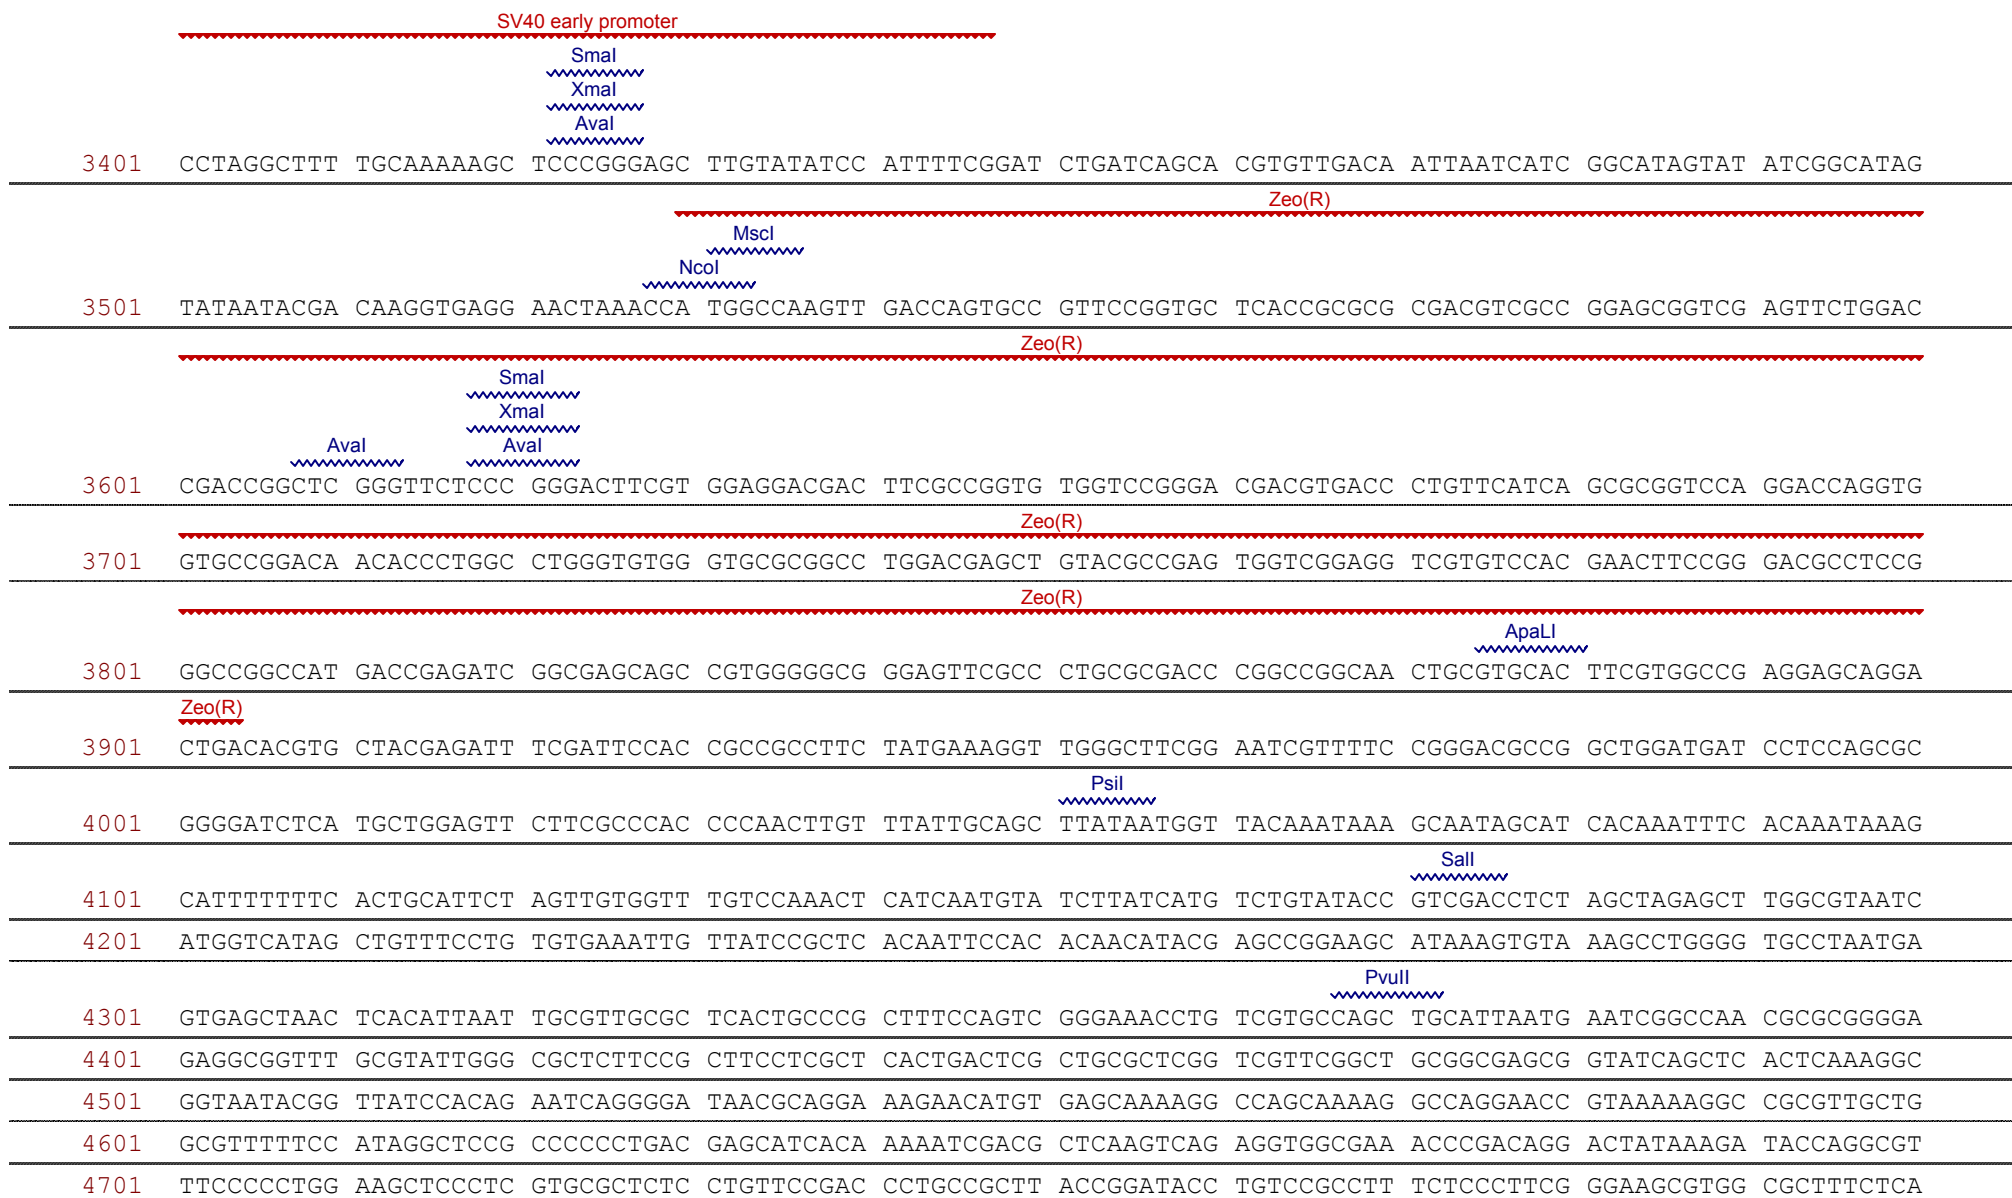

## pcDNA4/HisMax-tFoxP2

ApaI

4801 TAGCTCACGC TGTAGGTATC TCAGTTCGGT GTAGGTCGTT CGCTCCAAGC TGGGCTGTGT GCACGAACCC CCCGTTCAGC CCGACCGCTG CGCCTTATCC

4901 GGTAAC TATC GTCTT GAGTC CAACCC GGT AAGACAC GACT TATCG CCACT GGCAG CAGCC ACTGG TAAAC GGATT AGCAG AGCGAG GTAT GTAGGC GGTG

5001 CTACAGAGTT CTTGAAGTGG TGGCCTAACT ACGGCTACAC TAGAAGAACA GTATTTGGTA TCTGCGCTCT GCTGAAGCCA GTTACCTTCG GAAAAAGAGT

5101 TGGTAGCTCT TGATCCGGCA AACAAACCAC CGCTGGTAGC GGTTTTTTTTG TTTGCAAGCA GCAGATTACG CGCAGAAAAA AAGGATCTCA AGAAGATCCT

5201 TTGATCTTTT CTACGGGGTC TGACGCTCAG TGGAACGAAA ACTCACGTTA AGGGATTTTG GTCATGAGAT TATCAAAAAG GATCTTCACC TAGATCCTTT

5301 TAAATTAAAA ATGAAGTTTT AAATCAATCT AAAGTATATA TGAGTAAACT TGGTCTGACA GTTACCAATG CTTAATCAGT GAGGCACCTA TCTCAGCGAT

 $\text{Amp}(R)$ 

5401 CTGTCTATTT CGTTCATCCA TAGTTGCCTG ACTCCCCGTC GTGTAGATAA CTACGATACG GGAGGGCTTA CCATCTGGCC CCAGTGCTGC AATGATACCG

 $\text{Amp}(R)$ 

5501 CGAGACCCAC GCTCACCGGC TCCAGATTTA TCAGCAATAA ACCAGCCAGC CGGAAGGGCC GAGCGCAGAA GTGGTCCTGC AACTTTATCC GCCTCCATCC

 $\text{Amp}(R)$ 

5601 AGTCTATTAA TTGTTGCCGG GAAGCTAGAG TAAGTAGTTC GCCAGTTAAT AGTTTGCGCA ACGTTGTTGC CATTGCTACA GGCATCGTGG TGTCACGCTC

 $\text{Amp}(R)$ 

5701 GTCGTTTGGT ATGGCTTCAT TCAGCTCCGG TTCCCAACGA TCAAGGCGAG TTACATGATC CCCCATGTTG TGCAAAAAAG CGGTTAGCTC CTTCGGTCTT

 $\text{Amp}(R)$ 

Pvul

5801 CCGATCGTTG TCAGAAAGTAA GTTGGCCGCA GTGTTATCAC TCATGGTTAT GGCAGCACTG CATAATTCTC TTACTGTCAT GCCATCCGTA AGATGCTTTT

 $\text{Amp}(R)$ 

Scal

5901 CTGTGACTGG TGAGTACTCA ACCAAGTCAT TCTGAGAATA GTGTATGCGG CGACCGAGTT GCTCTTGCCC GGCGTCAATA CGGGATAATA CCGCGCCACA

 $\text{Amp}(R)$ 

6001 TAGCAGAACT TTAAAAGTGC TCATCATTGG AAAACGTTCT TCGGGGCGAA AACTCTCAAG GATCTTACCG CTGTTGAGAT CCAGTTCGAT GTAACCCACT

 $\text{Amp}(R)$ 

ApaLI

6101 CGTGCACCCA ACTGATCTTC AGCATCTTTT ACTTTTACCA GCGTTTCTGG GTGAGCAAAA ACAGGAAGGC AAAATGCCGC AAAAAAGGGA ATAAGGGCGA

 $\text{Amp}(R)$ 

6201 CACGGAATG TTGAATACTC ATACTCTTCC TTTTTC AATA TTATTGAAGC ATTTATCAGG GTTATTGTCT CATGAGCGGA TACATATTTG AATGTATTTA

 $\text{Amp}(R)$ 

Sall

ApaLI

6301 GAAAAATAAA CAAATAGGGG TTCCGCGCAC ATTTCCCCGA AAAGTGCCAC CTGACGTCGA CGGATCGGGA GATCTCCCGA TCCCCTATGG TGCACCTCTCA

pcDNA4/HisMax-tFoxP2

---

|      |             |            |            |            |            |            |            |            |            |            |
|------|-------------|------------|------------|------------|------------|------------|------------|------------|------------|------------|
| 6401 | GTACAACTCTG | CTCTGATGCC | GCATAGTTAA | GCCAGTATCT | GCTCCCTGCT | TGTGTGTTGG | AGGTCGCTGA | GTAGTGCGCG | AGCAAAATTT | AAGCTACAAC |
| 6501 | AAGGCAAGGC  | TTGACCGACA | ATTGCATGAA | GAATCTGCTT | AGGGTTAGGC | GTTTTGCGCT | GCTTCGCG   |            |            |            |

---

Page 1

g t t a c a t c g a a c t g g a t c t c a a c a g c g g t a a g a t c c t t g a g a g t t t t c g c c c c g a a g a a c g t t t t  
780  
c a a t g t a g c t t g a c c t a g a g t t g t c g c c a t t c t a g g a a c t c t c a a a a g c g g g g c t t c t t g c a a a a  
45 50 55 60  
Gly Tyr Ile Glu Leu Asp Leu Asn Ser Gly Lys Ile Leu Glu Ser Phe Arg Pro Glu Glu Arg Phe  
AMP

ccaatgatgagcacttttaaagtcttctgctatgtggcgcggtattatcccgtattgacgccgggca  
 845  
 gggtactactcgtgaaaatttcaagacgatacaccgcgccataatagggcataactgcggcccgt  
 65 70 75 80 85  
 Pro Met Met Ser Thr Phe Lys Val Leu Leu Cys Gly Ala Val Leu Ser Arg Ile Asp Ala Gly Gln  
 AMP

agagcgaactcggtcgccgcatacactattctcagaatgacttggttgagtactcaccagtcacag  
 tctcgttgagccagcggcgtatgtgataagagtccttactgaaccaactcatgagtggtcagtgtc  
 90 95 100 105  
 Glu Gln Leu Gly Arg Arg Ile His Tyr Ser Gln Asn Asp Leu Val Glu Tyr Ser Pro Val Thr  
 AMP

aaaagcatctttacggatggcatgacagtaagagaattatgcagtgtctgccataaccatgagtgat  
 ++++++  
 ttttcgtagaatgcctaccgtactgtcatttctcttaatacgtcacgacgggtatttggtactcacta  
 ++++++  
 Glu Lys His Leu Thr Asp Gly Met Thr Val Arg Glu Cys Ser Ala Ala Ile Thr Met Ser Asp  
 AMP

aacactgcgggccaacttacttctgacaacgatcggaggaccgaaggagctaaccgcttttttgc  
 ttgtgacgccggttgaatgaagactgttgcctccttggttcctcgattggcgaaaaaacgt  
 130 135 140 145 150  
 Asn Thr Ala Ala Asn Leu Leu Leu Thr Thr Ile Gly Gly Pro Lys Glu Leu Thr Ala Phe Leu His  
 AMP

caacatg ggggatcat gtaactc gccttgat cgttggg aaccggag ctgaatga agccata ccaa  
gttgta ccccttag tacattg agcggaa cttagcaa cccttgg cctcgac ttacttc ggtatg gt

155 160 165 170

Asn Met Gly Asp His Val Thr Arg Leu Asp Arg Trp Glu Pro Glu Leu Asn Glu Ala Ile Pro

AMP

1105

acgacgagcgtgacaccacgatgcctgtagcaatggcaacaacgttgcgcaaactattaactggc  
 1170  
 tgctgctcgcaactgtggtgctacggacatcgttaccgttgttgcaacgcgtttgataattgaccg  
 175 180 185 190  
 Asn Asp Glu Arg Asp Thr Thr Met Pro Val Ala Met Thr Thr Leu Arg Lys Leu Leu Thr Gly  
 AMP



gaactacttactctagcttcccggaacaattaatagactggatggaggcggataaagttgcagg 1235  
 cttgatgaatgagatcgaaggcggttgtaattatctgacctacctccgcctatttcaacgtcc  
 195 200 205 210 215  
 Glu Leu Leu Thr Leu Ala Ser Arg Gln Gln Leu Ile Asp Trp Met Glu Ala Asp Lys Val Ala Gly  
 AMP >

accacttctgcgctcggcccttccggctggctgggttattgctgataaatctggagccggtgagc 1300  
 tggatgaagacgcgagccgggaaggccgaccgaccaaataacgactatttagacctcggccactcg  
 220 225 230 235  
 Pro Leu Leu Arg Ser Ala Leu Pro Ala Gly Trp Phe Ile Ala Asp Lys Ser Gly Ala Gly Glu  
 AMP >

gtgggtctcgcggtatcattgcagcactggggccagatggtaagccctcccgtatcgtagttatc 1365  
 caccagagcgccatagtaacgtcgtgaccccggtctaccattcgggagggcatagcatcaatag  
 240 245 250 255  
 Arg Gly Ser Arg Gly Ile Ile Ala Ala Leu Gly Pro Asp Gly Lys Pro Ser Arg Ile Val Val Ile  
 AMP >

tacacgacggggagtcaggcaactatggatgaacgaaatagacagatcgctgagataggtgcctc 1430  
 atgtgctgcccctcagtcggtgatacctacttgctttatctgtctagcgactctatccacggag  
 260 265 270 275 280  
 Tyr Thr Thr Gly Ser Gln Ala Thr Met Asp Glu Arg Asn Arg Gln Ile Ala Glu Ile Gly Ala Ser  
 AMP >

actgattaagcattggtaactgtcagaccaagtttactcatatatacttttagattgattttaaac 1495  
 tgactaattcgttaaccattgacagtcgtggttcaaatagagtatatatgaaatctaactaaattttg  
 285  
 Leu Ile Lys His Trp \*  
 AMP >

ttcatttttaattttaaaggatctaggtgaagatcctttttgataatctcatgaccaaataccct 1560  
 aagtaaaaattaaattttcctagatccacttctaggaaaaactattagagtactgggttttaggga  
 1625  
 taacgtgagttttcgttccactgagcgtcagaccccgtagaaaagatcaaaggatcttcttgaga  
 attgcaactcaaagcaagggtgactcgcagtcctggggcatcttttctagtttcttagaagaactct  
 1690  
 tccttttttctgcgcgtaatctgctgcttgcaaacaaaaaaaccaccgctaccagcggtggttt  
 aggaaaaaaagacgcgcattagacgacgaacgtttgtttttttggtggcgatggtcgccaccaa  
 1755  
 gtttgccggatcaagagctaccaactctttttccgaaggtaactggcttcagcagagcgcagata  
 caaacggcctagtttctcgatggttgagaaaaaggcttccattgaccgaagtcgtctcgcgtctat  
 1820  
 ccaaatactgtccttctagtgtagccgtagttaggccaccacttcaagaactctgtagcaccgcc  
 gggttatgacaggaagatcacatcggcatcaatccggtggtgaagtctttgagacatcgtggcgg

tacataacctcgctctgctaatacctgttaccagtggtgctgctgccagtgggcgataagtcgtgtctta  
+-----+-----+-----+-----+-----+-----+-----+-----+-----+-----+ 1885  
atgtatggagcgagacgattaggacaatggtcaccgacgacggtcaccgctattcagcacagaat

ccgggttggactcaagacgatagttaccggataaggcgcagcggtcgggctgaacgggggggttcg  
+-----+-----+-----+-----+-----+-----+-----+-----+-----+-----+ 1950  
ggcccaacctgagttctgctatcaatggcctattccgcgtcgcagcccgacttgccccccaagc

tgcacacagcccagcttggagcgaacgacctaaccgaactgagatacctacagcgtgagcattg  
+-----+-----+-----+-----+-----+-----+-----+-----+-----+-----+ 2015  
acgtgtgtcgggtcgaaacctcgcttgctggatgtggcttgactctatggatgtcgcactcgtaac

agaaagcgccacgcttcccgaaggagaaaggcggacaggtatccggtaagcggcagggtcggaa  
+-----+-----+-----+-----+-----+-----+-----+-----+-----+-----+ 2080  
tctttcgcggtgcgaagggttccctctttccgcctgtccataggccattcgcggtcccagcctt

caggagagcgcacgaggagcttccaggggaaacgcctggtatctttatagtcctgtcgggttt  
+-----+-----+-----+-----+-----+-----+-----+-----+-----+-----+ 2145  
gtcctctcgcgtgctcctcgaagggtcccccttgcggaccatagaaatatcaggacagcccaaa

cgccacctctgacttgagcgtcgatttttgtgatgctcgtcaggggggcggagcctatggaaaaa  
+-----+-----+-----+-----+-----+-----+-----+-----+-----+-----+ 2210  
gcggtggagactgaactcgcagctaaaaacactacgagcagtccccccgctcggataccttttt

cgccagcaacgcggcctttttacggttcctggccttttgctggccttttgctcacatgttctttc  
+-----+-----+-----+-----+-----+-----+-----+-----+-----+-----+ 2275  
gcggtcgttgcgccggaaaaaatgccaaaggaccggaaaaacgaccggaaaaacgagtggtacaagaaag

ctgcgttatccctgattctgtggataaccgtattaccgcctttgagtgagctgataccgctcgc  
+-----+-----+-----+-----+-----+-----+-----+-----+-----+-----+ 2340  
gacgcaataggggactaagacacctattggcataatggcggaaactcactcgactatggcgagcg

cgcagccgaacgaccgagcgcagcgagtcagtgagcggaggaagcggaaagagcgcctgatgcggta  
+-----+-----+-----+-----+-----+-----+-----+-----+-----+-----+ 2405  
gcgtcggcttgctggctcgcgtcgtcagtcactcgtccttcgccttctcgcggactacgccat

ttttctccttacgcatctgtgcggtatttcacaccgcagaccagccgcgtaacctggcaaaatcg  
+-----+-----+-----+-----+-----+-----+-----+-----+-----+-----+ 2470  
aaaagaggaatgcgtagacacgccataaagtgtggcgtctggtcggcgcattggaccgttttagc

gttacggttgagtaataaatggatgccctgcgtaagcgggtgtgggaggacaataaagtcttaaa  
+-----+-----+-----+-----+-----+-----+-----+-----+-----+-----+ 2535  
caatgccaaactcattatttacctacgggacgcatttcgccacacccgcctgttatttcagaattt

Tn7L

ctgaacaaaatagatctaaactatgacaataaagtcttaaaactagacagaatagttgtaaaactga  
+-----+-----+-----+-----+-----+-----+-----+-----+-----+-----+ 2600  
gacttgttttatctagatttgatactgttatttcagaatttgatctgtcttatcaacatttgact

Tn7L

aatcagtcaggttatgctgtgaaaaagcatactggacttttgttatggctaaagcaaactcttca  
 ttagtcaggtcaatacgacactttttcgtatgacctgaaaacaataccgatttcgtttgagaagt

2665

Tn7L

BstXI

ttttctgaagtgcaaattgcccgctcgatttaaagaggggctggccaagggcatggtaaagacta  
 aaaagacttcacgtttaacgggcagcataatttctccccgcaccggttcccgtagcattttctgat

2730

Tn7L

tattcgccggttggtgacaatttaccgaacaactccgcggccgggaagccgatctcggcttgaac  
 ataagcgccgcaaacactgttaaattggcttgttgaggcgccggcccttcggctagagccgaacttg

2795

Tn7L

gaattgttaggtggcggtacttgggtcgatatcaaagtgcatacttcttcccgtagtgcceaact  
 cttacaatccaccgcatgaaccagctatagtttcacgtagtgaagaagggcatacgggttga

2860

175 170 165 160  
 \* Thr Ala Thr Ser Pro Asp Ile Asp Phe His Met Val Glu Glu Arg Ile Gly Leu Lys  
 Gentamicin

ttgtatagagagccactgcgggatcgtcacccgtaatctgcttgcacgtagatcacataagcacca  
 aacatatctctcgggtgacgccctagcagtggcattagacgaacgtgcatctagtgtattcgtggt

2925

155 150 145 140  
 Thr Tyr Leu Ala Val Ala Pro Asp Asp Gly Tyr Asp Ala Gln Val Tyr Ile Val Tyr Ala Gly  
 Gentamicin

agcgcggttggcctcatgcttgaggagattgatgagcgcggtggcaatgccctgcctccgggtgctc  
 tcgcgcaaccggagtagcaactcctctaactactcgcgccaccggttacgggacggaggccacgag

2990

135 130 125 120  
 Leu Ala Asn Ala Glu His Lys Leu Asn Ile Leu Ala Thr Ala Ile Gly Gln Arg Arg His Glu  
 Gentamicin

gccggagactgcgagatcatagatatagatctcactacgcggctgctcaaacctgggcagaacgt  
 cggcctctgacgctctagtagtctatatacttagagtgatgcgccgacgagtttggaaccgtcttgca

3055

115 110 105 100 95  
 Gly Ser Val Ala Leu Asp Tyr Ile Tyr Ile Glu Ser Arg Pro Gln Glu Phe Arg Pro Leu Val Tyr  
 Gentamicin

aagccgcgagagcgccaacaaccgcttcttgggtcgaaggcagcaagcgcgatgaatgtcttacta  
 ttcggcgctctcgcggttgttggcgaagaaccagcttccgctcgttcgcgctacttacagaatgat

3120

90 85 80 75  
 Ala Ala Leu Ala Gly Val Val Ala Glu Gln Asp Phe Ala Ala Leu Ala Ile Phe Thr Lys Ser  
 Gentamicin

cggagcaagttcccgaggtaatcggagtcgggctgatgttgggagtaggtggctacgtctccgaa  
 3185  
 gcctcgttcaaggggtccattagcctcaggccgactacaaccctcatccacgatgcagaggctt  
 70 65 60 55  
 Arg Leu Leu Asn Gly Leu Tyr Asp Ser Asp Pro Gln His Gln Ser Tyr Thr Ala Val Asp Gly Phe  
 Gentamicin

ctcacgaccgaaaagatcaagagcagcccgcatggatttgacttgggtcagggccgagcctacatg  
 gagtgctggcttttctagttctcgtcgggcgtacctaaactgaaccagtcccgggctcggatgtac  
 50 Arg Gly Phe Leu Asp Leu Ala Ala Arg Met Ser Lys Val Gln Asp Pro Gly Leu Arg Cys Thr  
 Gentamicin

tgcgaatgatgccatactttgagccacctaactttgttttagggcgactgccctgctgcgtaaca  
 acgcttactacgggtatgaactcggtggaattgaaacaaaatcccgctgacgggacgacgcattgt

25 20 15 10  
 Arg Ile Ile Gly Met Ser Ser Gly Gly Leu Lys Thr Lys Pro Arg Ser Gly Gln Gln Thr Val

< Gentamicin

tcgttgctgctgctgctaaccatcgttgctgctccataaacatcaaaccatcgacccacggcgtaacgcg  
 agcaacgacgacgcattgtagcaacgacgaggtattgtagttttagctgggtgccgcattgcgc

5 1  
 Asp Asn Ser Ser Arg Leu Met

< Gentamicin

3380

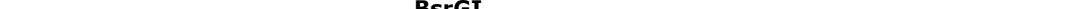
  
 c t t g c t g c t t g g a t g c c c g a g g c a t a g a c t g t a c a a a a a a c a g t c a t a a c a a g c c a t g a a a a c c
 3445

gccaactgcgccgttaccaccgctgcggttcgggtcaagggttctggaccagttgcgtgagcgcatacg  
+-----+-----+-----+-----+-----+-----+-----+-----+-----+-----+  
cggtgacgcggcaatggtggcgacgcaagccagttccaagacctggtcaacgcactcgcgtatgc

3510

ctacttgcattacagtttacgaaccgaacaggcttatgtcaactgggttcgtgccttcattccgtt  
+-----+-----+-----+-----+-----+-----+-----+-----+-----+-----+  
gatgaacgtaatgtcaaattgcttggcttgtccgaatacagttgacccaagcacggaagttaggcaa

tccacgggtgtgcgtcaccggaaccttgggcagcagcgaagtgcaggcattttctgtcctggctg  
+-----+-----+-----+-----+-----+-----+-----+-----+-----+  
aggtgccacacgcagtgggccgttggaaaccgtcgctcgcttcagctccgttaaagacaggaccgac

3640

g c g a a c g a g c g c a a g g t t t c g g t c t c c a c g c a t c g t c a g g c a t t g g c g g c t t g c t g t t c t t c t a  
+-----+-----+-----+-----+-----+-----+-----+-----+-----+-----+-----+-----+-----+-----+  
c g c t t g c t c g c g t t c c a a g c c a g a g g t g c g t a g c a g t c c g t a a c c g c c g g a a c g a c a a g a a g a t

3705

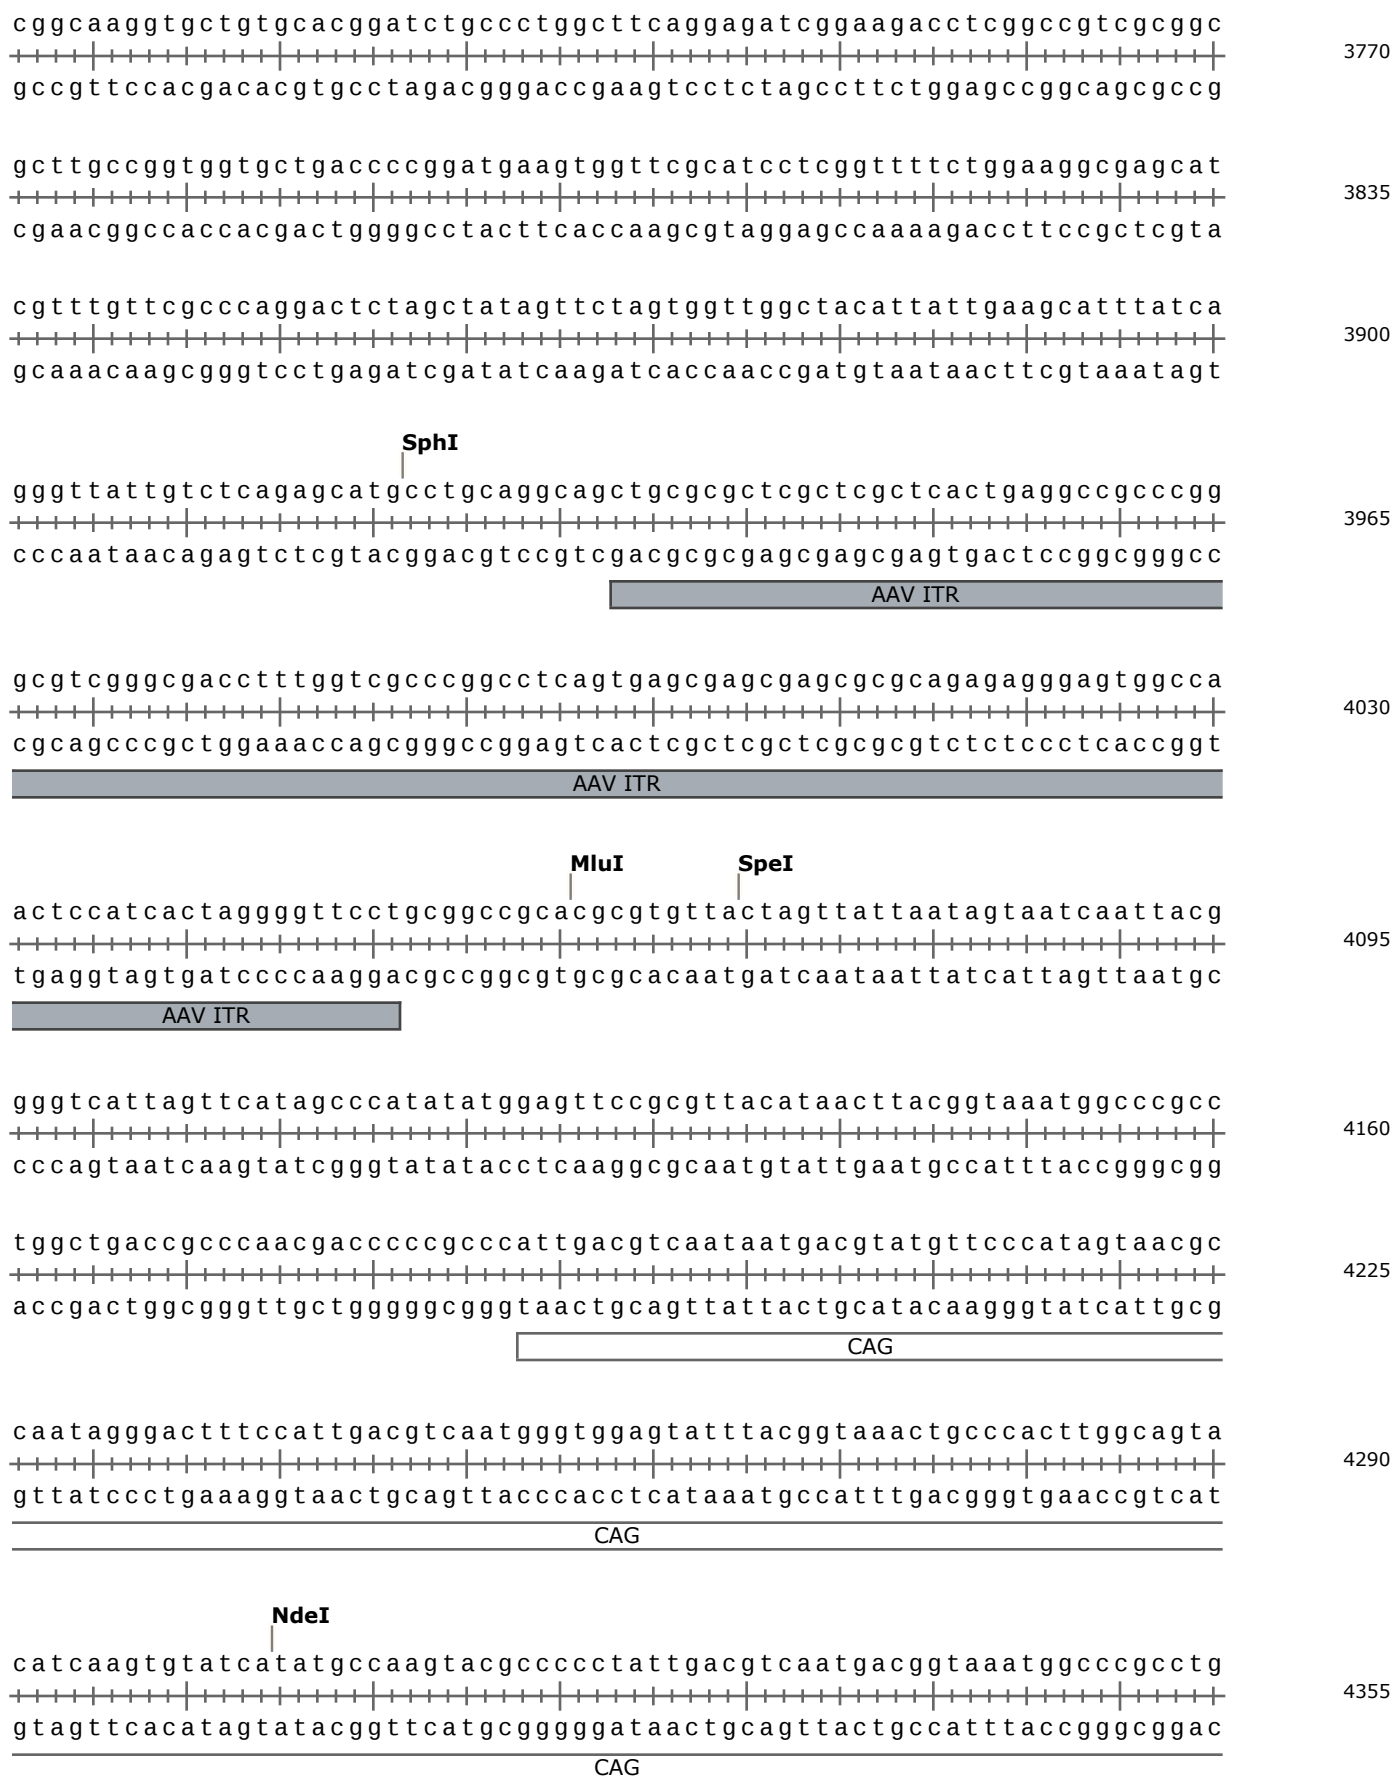

|                                                                                                                                    |      |
|------------------------------------------------------------------------------------------------------------------------------------|------|
| gcattatgcccagtacatgaccttatgggactttcctacttggcagtacatctacgtattagtcacgtaatacgggtcatgtactggaataccctgaaaggatgaaccgtcatgtagatgcataatcagt | 4420 |
| CAG                                                                                                                                |      |
| tcgctattaccatggtcgaggtgagccccacgttctgcttcactctccccatctccccccctccagcgataatggtaccagctccactcggggtgcaagacgaagtgagaggggtagaggggggggagg  | 4485 |
| CAG                                                                                                                                |      |
| ccaccccccaattttgtattttatttttttaattattttgtgcagcgatgggggcggggggggggggtggtgggggttaaaacataaataaaaaatttaataaaacacgtcgctacccccgccccccccc | 4550 |
| CAG                                                                                                                                |      |
| gggggggcgcgcgccaggcggggcggggcggggcgagggcggggcggggcgaggcggagaggtgcccccccgcgcggtccgccccgccccgccccgctccccgccccgccccgctccgcctctccac    | 4615 |
| CAG                                                                                                                                |      |
| cggcggcagccaatcagagcggcgcgctccgaaagtttccttttatggcgaggcggcggcggcggcgccggtcggttagtctcgccgcgcgaggccttcaaggaaaataccgctccgcccgcgcgcc    | 4680 |
| CAG                                                                                                                                |      |
| cggccctataaaaagcgaagcgcgcgggcgggaggcgtcgctgcgacgctgccttcgccccgtgcgccgggatatttttcgcttcgcgcgcccgcctcagcgacgctgcgacggaagcggggcacg     | 4745 |
| CAG                                                                                                                                |      |
| cccgtccgcccgcgcctcgcgcggcccgccccggctctgactgaccgcgttactcccacaggtggggcgaggcggcggcggagcgcggcgggaggccgagactgactggcgcaatgaggggtgtccac   | 4810 |
| CAG                                                                                                                                |      |
| agcgggcgggacggcccttctcctccgggctgtaattagcgcttgggttaatgacggcttgtttc                                                                  | 4875 |
| CAG                                                                                                                                |      |
| ttttctgtggctgcgtgaaagccttgaggggctccgggagggccctttgtgcgggggggagcggctaaaagacaccgacgcactttcggaactccccgaggccctccgggaaacacgccccctcgccga  | 4940 |
| CAG                                                                                                                                |      |

cggggctgtccgcggggggacggctgccttcgggggggacggggcagggcggggttcggcttctg 5005  
 gccccgacaggcgccccctgccgacggaagccccccctgccccgtcccgcaccaagccgaagac

CAG

**XbaI**

gcgtgtgaccggcggtcttagagcctctgctaaccatgttcatgccttcttcttttcttacagc 5070  
 cgcacactggccgcccagatctcggagacgatttggtacaagtacggaagaagaaaaaggatgtcg

CAG

**BamHI**

tcctgggcaacgtgctgggttattgtgctgtctcatcattttggcaaagaattggatccgccacca 5135  
 aggaccggttgacagaccaataacacgacagagtagtaaaaccgtttcttaacctaggcggtggt

CAG


 dnFoxP2

tgatgcaggaatctgcgacagagacaataagcaacagttcaatgaatcaaaatggaatgagcact 5200  
 actacgtccttagacgctgtctctgttattcgttggtcaagttacttagttttaccttactcgtga

1 Met Met Gln Glu Ser Ala Thr Glu Thr Ile Ser Asn Ser Ser Met Asn Gln Asn Gly Met Ser Thr  
 dnFoxP2

ctaagcagccaattagatgctggcagcagagatggaagatcaagtgggtgacacgagcactgaagt 5265  
 gattcgtcgggttaatctacgaccgtcgtctctaccttctagttcaccactgtgctcgtgacttca

25 Leu Ser Ser Gln Leu Asp Ala Gly Ser Arg Asp Gly Arg Ser Ser Gly Asp Thr Ser Thr Glu Val  
 dnFoxP2

aagcacagtagaactgctgcatctgcaacaacagcaggcactccaggcagcaaggcagctgcttt 5330  
 ttcgtgtcatcttgacgacgtagacgttggtgtcgtccgtgaggtccgtcgttccgtcgacgaaa

45 Ser Thr Val Glu Leu Leu His Leu Gln Gln Gln Ala Leu Gln Ala Ala Arg Gln Leu Leu  
 dnFoxP2

**Bsu36I****AarI  
BfuAI  
BspMI**

tacagcaacagacaagtggactgaaatctcctaagggcagtgagaaacagagaccgctgcagggtg 5395  
 atgtcgttgctgtttcacctgacttttagaggattcccgtcactctttgtctctggcgacgtccac

70 Leu Gln Gln Gln Thr Ser Gly Leu Lys Ser Pro Lys Gly Ser Glu Lys Gln Arg Pro Leu Gln Val  
 dnFoxP2


 1472-correct-G-to-A-PCR-R

Page 10



**BstAPI**

ctccagatgcaacaacttcagcagcagcaacatctgctgaaccttcagcgtcagggactcatttc  
 gaggtctacgttggtgaagtcgtcgtcgttgtagacgacttggaagtcgcagtcacctgagtaaag

5850

220 225 230 235  
 Leu Gln Met Gln Gln Leu Gln Gln Gln His Leu Leu Asn Leu Gln Arg Gln Gly Leu Ile Ser

dnFoxP2

**AflII**

catccacactggccaatctgctcttcctgtccagtccttgcacaaagctggcttaagtcctgctg  
 gtagggtggaccggttagacgagaaggacaggtcagagacggtgttcgaccgaattcaggacgac

5915

240 245 250 255 260  
 Ile Pro Pro Gly Gln Ser Ala Leu Pro Val Gln Ser Leu Pro Gln Ala Gly Leu Ser Pro Ala

dnFoxP2

agattcagcagttatggaaagaagtgactggagttcacagtatggaagacaatggcattaaacat  
 tctaagtcgtcaatacctttcttcaactgacctcaagtgatcaccttctgttaccgtaatttgta

5980

265 270 275 280  
 Glu Ile Gln Gln Leu Trp Lys Glu Val Thr Gly Val His Ser Met Glu Asp Asn Gly Ile Lys His

dnFoxP2

ggagggctagacctcactactaacaattcctccttactacctcctccaccacttccaaagcatc  
 cctcccgatctggagtgatgattgttaaggaggagatgatggaggaggtggtgaagggttcgtag

6045

285 290 295 300  
 Gly Gly Leu Asp Leu Thr Thr Asn Asn Ser Ser Ser Thr Ser Ser Thr Ser Lys Ala Ser

dnFoxP2

accaccaataactcatcattccatagtgaaatggacagtcctcagttctaaatgcaaggcgagaca  
 tgggtgggttattgagtagtaagggtatcacttacctgtcagaagtcaagatttacgttcgctctgt

6110

305 310 315 320 325  
 Pro Pro Ile Thr His His Ser Ile Val Asn Gly Gln Ser Ser Val Leu Asn Ala Arg Arg Asp

dnFoxP2

gctcgtcacatgaggagactggggcctccatactctctatgggtcatggagtttgcaaattggcct  
 cgagcagtgtaactcctctgaccccgagggtatgagagataccagtacctcaaacgtttaccgga

6175

330 335 340 345  
 Ser Ser Ser His Glu Glu Thr Gly Ala Ser His Thr Leu Tyr Gly His Gly Val Cys Lys Trp Pro

dnFoxP2

**NsiI**

ggctgtgaaagcgtttgtgaagattttggacaatttttaaagcaccttaacaatgaacatgcatt  
 ccgacactttcgcaaacacttctaaaacctgttaaaaatttcgtggaattgttacttgtacgtaa

6240

350 355 360 365  
 Gly Cys Glu Ser Val Cys Glu Asp Phe Gly Gln Phe Leu Lys His Leu Asn Asn Glu His Ala Leu

dnFoxP2

ggatgacagaagcactgctcagtgtcgggtgcaaagtgaagtgggttcagcagttagaaatacagc  
 cctactgtcttcgtgacgagtcacagcccacgtttacgttcaccaagtcgtcaatctttatgtcg  
 370 375 380 385 390  
 Asp Asp Arg Ser Thr Ala Gln Cys Arg Val Gln Met Gln Val Val Gln Gln Leu Glu Ile Gln  
 dnFoxP2

tttctaagaacgcgaacgtcttcaagcaatgatgaccacttgcacatgcgaccctcggagccc  
 aaagatttcttgcgcttgcagaagttcgttactactgggtgaacgtgtacgctgggagcctcggg  
 395 400 405 410  
 Leu Ser Lys Glu Arg Glu Arg Leu Gln Ala Met Met Thr His Leu His Met Arg Pro Ser Glu Pro  
 dnFoxP2

aagccatctccaaaacctgtaagtgcataattgctttataaacagtaaataggctcgacctcgagaa  
 ttcggtagagggttttggacattcacgtataacgaaatatttgtcatttatccagctggagctctt  
 415 420 425  
 Lys Pro Ser Pro Lys Pro Val Ser Ala Tyr Cys Phe Ile Asn Ser Lys  
 dnFoxP2  
 SalI AccI TliI XhoI PaeR7I  
 WPRE

tcaacctctggattacaaaatttgtgaaagattgactgggtattcttaactatgttgctcctttta  
 agttggagacctaatgttttaaacactttcttaactgaccataagaattgatacaacgaggaaaat  
 WPRE

cgctatgtggatacgtgctttaatgcctttgtatcatgctattgcttcccgtatggctttcatt  
 gcgatacacctatgcgacgaaattacggaaacatagtagataacgaagggcataccgaaagtaa  
 WPRE

ttctcctccttgataaaatcctgggtgctgtctctttatgaggagttgtggcccggtgtcaggca  
 aagaggaggaacatatttaggaccaacgacagagaaatactcctcaacaccgggcaacagtccgt  
 WPRE

acgtggcggtggtgtgactgtgtttgctgacgcaacccccactgggttggggcattgccaccacct  
 tgcaccgcaccacacgtgacacaaacgactgctgtgggggtgaccaaccccgtaacggtggtgga  
 WPRE

gtcagctcctttccgggactttcgctttcccccctccctattgccacggcggaactcatcgccgcc  
 cagtcgaggaaaggccctgaaagcgaaagggggaggataacggtgccgccttgagtagcggcgg  
 WPRE

tgccttgcctgctgctggacaggggctcggctgttgggcactgacaattccgtggtgttgtcggg  
 +-----+-----+-----+-----+-----+-----+-----+-----+-----+-----+  
 acggaacgggagcagacgtgtcccgagccgacaaaccgtgactgttaaggcaccacaacagccc  
 +-----+-----+-----+-----+-----+-----+-----+-----+-----+-----+  
 WPRE

gaagctgacgtcctttccatggctgctcgccctgtgttggcacctggattctgcgcgggacgtcct  
 +-----+-----+-----+-----+-----+-----+-----+-----+-----+-----+  
 cttcgactgcaggaaaggtaccgacgagcggacacaacggtggacctaagacgcgccctgcagga  
 +-----+-----+-----+-----+-----+-----+-----+-----+-----+-----+  
 WPRE

tctgctacgtcccttcggccctcaatccagcggaccttccttcccgcggcctgctgccggctctg  
 +-----+-----+-----+-----+-----+-----+-----+-----+-----+-----+  
 agacgatgcagggaagccgggagttaggtcgccctggaaggaagggcgccggacgacggccgagac  
 +-----+-----+-----+-----+-----+-----+-----+-----+-----+-----+  
 WPRE

cgccctcttcgcggtcttcgcctccgccctcagacgagtcggatctccctttgggcccgcctcccc  
 +-----+-----+-----+-----+-----+-----+-----+-----+-----+-----+  
 gccggagaaggcgcagaagcggaggcgggagttctgctcagcctagagggaaaccggcggagggg  
 +-----+-----+-----+-----+-----+-----+-----+-----+-----+-----+  
 WPRE

**Acc65I**      **KpnI**  
 |            |  
 gcggtacccaattcgccctatagtgagtcgtattacgcgcgcagcggccgaccatggcccaactt  
 +-----+-----+-----+-----+-----+-----+-----+-----+-----+-----+  
 cgccatgggttaagcgggatatactcagcataatgcgcgcgtcgccggctggtaccgggttgaa  
 +-----+-----+-----+-----+-----+-----+-----+-----+-----+-----+  
 SV40pA-144bp  
 WPRE

gtttattgcagcttataatggttacaaataaagcaatagcatcacaaatttcacaaataaagcat  
 +-----+-----+-----+-----+-----+-----+-----+-----+-----+-----+  
 caaataacgtcgaatattaccaatgtttatttcggtatcgtagtgtttaaagtgtttatttcgta  
 +-----+-----+-----+-----+-----+-----+-----+-----+-----+-----+  
 SV40pA-144bp

ttttttcactgcattctagttgtgggttgtccaaactcatcaatgtatcttatcatgtctggatc  
 +-----+-----+-----+-----+-----+-----+-----+-----+-----+-----+  
 aaaaaagtgcgtaagatcaacaccaaacagggttgagtagttacatagaatagtacagacctag  
 +-----+-----+-----+-----+-----+-----+-----+-----+-----+-----+  
 SV40pA-144bp

**BspEI**      **PmlI**      **RsrII**  
 |            |            |  
 tccggaccacgtgcggaccgagcggccgcaggaacccttagtgatggagttggccactccctctc  
 +-----+-----+-----+-----+-----+-----+-----+-----+-----+-----+  
 aggcttggtgcacgcctggctcgccggcgtccttggggatcactacctcaaccggtgagggagag  
 +-----+-----+-----+-----+-----+-----+-----+-----+-----+-----+  
 SV40pA-144bp      AAV ITR

tgcgcgctcgctcgctcactgaggccgggagaccaaaggctcgcccgacgcccgggctttgcccg  
 +-----+-----+-----+-----+-----+-----+-----+-----+-----+-----+  
 acgcgcgagcgcgagtgactccggcccgtgtgttccagcgggctgcggggcccgaaacggggc  
 +-----+-----+-----+-----+-----+-----+-----+-----+-----+-----+  
 AAV ITR

g c g g c c t c a g t g a g c g a g c g a g c g c g c a g c t g c c t g c a g g a a g c t g t a a g c t t g t c g a g a a g t a c  
c g c c g g a g t c a c t c g c t c g c t c g c g c g t c g a c g g a c g t c c t t c g a c a t t c g a a c a g c t c t t c a t g

AAV ITR

HindIII

7410

tagaggatcataatcagccataccacatttgttagagggttttacttggctttaaaaaacctcccaca  
 ++++++  
 atctcctagtattagtcggtatggtgtaaacatctccaaatgaacgaaattttttggagggtgt

SV40pA-237bp

7475

ataatggttacaaataaagcaatagcatcacaaatttcacaaataaagcattttttttcactgcat  
 ++++++  
 tattaccaatgtttatttcgttatcgtagtgttttaagtgtttatttcgtaaaaaaagtgcgta  
 SV40pA-237bp

tctagttgttggtttgtccaaactcatcaatgatatcttatcatgtcttggatctgatcactgatatc  
+ + + + +  
agatcaacaccaaacagggtttgagttagttacatagaatagtacagacctagactagtgtgactatag

SV40pA-237bp

7670

**AvrII**  
 g c c t a g g a g a t c c g a a c c a g a t a a g t g a a a t c t a g t t c c a a a c t a t t t t g t c a t t t t t a a t t t t c  
 c g g a t c c t c t a g g c t t g g t c t a t t c a c t t t a g a t c a a g g t t t g a t a a a a c a g t a a a a a t t a a a a g  
 Tn7R

[illegible]

aaaaactccattttccaccccttccagttcccaactattttgtcgcgccacagcggggcatttttct  
 ++++++  
 ttttgaggtaaaaggtggggagggtcaagggttgataaaacaggcgggtgtcgcgcccgtaaaaaga  
 Tn7R

t c c t g t t a t g t t t t t a a t c a a a c a t c c t g c c a a c t c c a t g t g a c a a a c c g t c a t c t t c g g c t a c t  
+ + + + + | + + + + + | + + + + + | + + + + + | + + + + + | + + + + + | + + + + + | + + + + + | + + + + + |  
a g g a c a a t a c a a a a a t t a g t t t g t a g g a c g g t t g a g g t a c a c t g t t t g g c a g t a g a a g c c g a t g a

7930

ttttctctgtcacagaatgaaaatttttctgtcatctcttcgttattaatgtttgtaattgactg  
+++++|+++++|+++++|+++++|+++++|+++++|+++++|+++++|+++++|+++++|  
aaaagagacagtgtcttacttttaaaaagacagtagagaagcaataattacaaacattaactgac

7995

aatatcaacgcttatttgcagcctgaatggcgaatg 3'  
+++++|+++++|+++++|+++++|+++++|+++++|+++++|+++++|+++++|+++++| ••• 8031  
ttatagttgcgaataaacgtcggacttaccgcttac 5'
