# Supplementary material for: FoxP2 isoforms delineate spatiotemporal transcriptional networks for vocal learning in the zebra finch
Source: eLife. 2018 Jan 23;7:e30649. doi: 10.7554/eLife.30649 (PMC5826274; doi:10.7554/eLife.30649)
Supplement: Supplementary file 2. — (A) xlsx workbook containing gene ontology information from the GeneCards GeneAnalytics module. For each module, there are four tabs sorted by default by descending module significance. Columns within each module are defined as follows: (1) Diseases: [A] Enrichment score. [B] Enrichment term. [C] Disease category. [D] Total genes annotated with this term. [E] Genes in this module annotated with this term. [F] Human gene symbols for genes in column E. [G] Link to disease page in GeneCards database. [H] Genetic associations (if applicable). [I] Matched genes for genetic associations (if applicable). [J] Differentially expressed in diseased tissues. [K] Matched genes for differential expression in diseased tissues. [L-P] Module and term significances for all behavior metrics (see Materials and methods). (2) GO – Biological Process, GO – Molecular Function, Pathways: [A] Enrichment score. [B] Enrichment term or pathway name. [C] Total genes annotated with this term or pathway. [D-E] Number and symbol of genes in this module annotated with this term. [F] Link to AMIGO or PathCards site for ontology term or pathway. [G-K] Module and term significances for all behavior metrics (see Materials and methods). [file elife-30649-supp2.xlsx]

## Sheet: black_Diseases
Score	Name	Disease categories	# Total Genes	# Matched Genes	Matched Genes (Symbols)	Evidence URL	Genetic Associations	Matched Genes for Genetic Associations	Diferentially Expressed Genes in Tissue Samples	Genes Matched to Differentially Expressed Genes	module.significance	ts.motifs	ts.learning	ts.variability.induction	ts.identity
1.22	Distal Arthrogryposis	Muscle diseases, Rare diseases, Fetal diseases, Genetic diseases	16	1	C12orf4	http://www.malacards.org/card/distal_arthrogryposis					NA	NA	NA	NA	NA
4.79	Meier-Gorlin Syndrome 1	Neuronal diseases, Bone diseases, Ear diseases, Rare diseases, Fetal diseases, Genetic diseases	15	4	ATR, CEP152, CEP63, KAT6B	http://www.malacards.org/card/meier_gorlin_syndrome_1					0.80706	0.394047	0.117225	0.498763	0.141639
2.83	Seckel Syndrome 5	Neuronal diseases, Bone diseases, Rare diseases, Fetal diseases, Genetic diseases	1	1	CEP152	http://www.malacards.org/card/seckel_syndrome_5	Causative mutation Ð Humsavar, Genetic Tests, Molecular basis known	CEP152			0.80402	0.538693	0.175276	0.48402	0.15598
2.83	Microcephaly 4, Primary, Autosomal Recessive	Eye diseases, Neuronal diseases, Mental diseases, Rare diseases, Fetal diseases, Genetic diseases	2	1	CEP152	http://www.malacards.org/card/microcephaly_4_primary_autosomal_recessive	Molecular basis known	CEP152			0.80402	0.538693	0.175276	0.48402	0.15598
2.83	Microcephaly 9, Primary, Autosomal Recessive	Eye diseases, Neuronal diseases, Mental diseases, Rare diseases, Fetal diseases, Genetic diseases	1	1	CEP152	http://www.malacards.org/card/microcephaly_9_primary_autosomal_recessive	Causative mutation Ð Humsavar, Genetic Tests, Molecular basis known	CEP152			0.80402	0.538693	0.175276	0.48402	0.15598
2.83	Wolcott-Rallison Syndrome	Endocrine diseases, Bone diseases, Rare diseases, Fetal diseases, Genetic diseases	3	1	EIF2AK3	http://www.malacards.org/card/wolcott_rallison_syndrome	Pathogenic, Causative mutation Ð Humsavar, Genetic Tests, Molecular basis known, Causative germline mutation	EIF2AK3			0.803956	0.587692	0.0382683	0.547494	0.0205009
5.02	Primary Autosomal Recessive Microcephalies and Seckel Syndrome Spectrum Disorders		16	4	ATR, CEP152, CEP63, NIN	http://www.malacards.org/card/primary_autosomal_recessive_microcephalies_and_seckel_syndrome_spectrum_disorders					0.798813	0.388822	0.116826	0.483082	0.117426
10.58	Seckel Syndrome	Neuronal diseases, Bone diseases, Rare diseases, Fetal diseases, Genetic diseases	28	7	ATR, CEP152, CEP63, NIN, PLK4, RTTN, TUBGCP6	http://www.malacards.org/card/seckel_syndrome	Causative germline mutation	ATR, CEP152, PLK4			0.792315	0.356768	0.178158	0.461014	0.145016
2.83	Myoclonic-Astastic Epilepsy	Neuronal diseases, Rare diseases	2	1	CHD2	http://www.malacards.org/card/myoclonic_astastic_epilepsy	Causative germline mutation	CHD2			0.78453	0.522497	0.0248696	0.482486	0.0800221
2.83	Dystonia 25	Neuronal diseases, Ear diseases, Muscle diseases, Rare diseases, Genetic diseases	1	1	GNAL	http://www.malacards.org/card/dystonia_25	Pathogenic, Causative mutation Ð Humsavar, Genetic Tests, Molecular basis known	GNAL			0.776344	0.327617	0.123439	0.524808	0.0767804
2.83	Autosomal Dominant Focal Dystonia, Dyt25	Neuronal diseases, Rare diseases	1	1	GNAL	http://www.malacards.org/card/autosomal_dominant_focal_dystonia_dyt25	Causative germline mutation	GNAL			0.776344	0.327617	0.123439	0.524808	0.0767804
6.38	Autosomal Recessive Primary Microcephaly	Eye diseases, Neuronal diseases, Mental diseases, Rare diseases, Fetal diseases, Genetic diseases	15	3	ANKLE2, CEP152, CEP63	http://www.malacards.org/card/autosomal_recessive_primary_microcephaly	Causative germline mutation	ANKLE2, CEP152, CEP63			0.775912	0.412526	0.133974	0.489859	0.124146
2.83	Sbbyss Syndrome	Genetic diseases	1	1	KAT6B	http://www.malacards.org/card/sbbyss_syndrome	Pathogenic, Molecular basis known	KAT6B			0.773048	0.418992	0.095858	0.474652	0.200993
2.83	Blepharophimosis-Intellectual Disability Syndrome, Sbbys Type	Endocrine diseases, Neuronal diseases, Rare diseases, Fetal diseases	4	1	KAT6B	http://www.malacards.org/card/blepharophimosis_intellectual_disability_syndrome_sbbys_type	Causative germline mutation	KAT6B			0.773048	0.418992	0.095858	0.474652	0.200993
2.83	Genitopatellar Syndrome	Neuronal diseases, Bone diseases, Rare diseases, Fetal diseases, Genetic diseases	2	1	KAT6B	http://www.malacards.org/card/genitopatellar_syndrome	Pathogenic, Molecular basis known, Causative germline mutation	KAT6B			0.773048	0.418992	0.095858	0.474652	0.200993
4.07	Focal Dystonia	Neuronal diseases, Rare diseases	11	3	ANO3, GNAL, TBP	http://www.malacards.org/card/focal_dystonia					0.768137	0.306487	0.196899	0.399943	0.199178
4.38	Peters Anomaly	Eye diseases, Neuronal diseases, Cardiovascular diseases, Rare diseases, Fetal diseases, Genetic diseases, Metabolic diseases	17	2	B3GLCT, TGFB2	http://www.malacards.org/card/peters_plus_syndrome	Pathogenic, Molecular basis known, Causative germline mutation	B3GLCT, TGFB2			0.754149	0.434767	0.35709	0.420815	0.146305
2.83	Short-Rib Thoracic Dysplasia 8 with or Without Polydactyly	Genetic diseases	1	1	WDR60	http://www.malacards.org/card/short_rib_thoracic_dysplasia_8_with_or_without_polydactyly	Pathogenic, Causative mutation Ð Humsavar, Genetic Tests, Molecular basis known	WDR60			0.752456	0.510165	0.273894	0.261102	0.29722
5.7	Medulloblastoma	Neuronal diseases, Cancer diseases, Rare diseases, Genetic diseases	57	4	BMI1, BRCA2, CTNNB1, IRS1	http://www.malacards.org/card/medulloblastoma	Pathogenic, Causative mutation Ð Humsavar	BRCA2, CTNNB1			0.737519	0.366363	0.13437	0.431633	0.197471
5.31	Neonatal Adrenoleukodystrophy	Endocrine diseases, Eye diseases, Neuronal diseases, Liver diseases, Rare diseases, Genetic diseases, Metabolic diseases	19	3	CAT, PEX1, PEX26	http://www.malacards.org/card/neonatal_adrenoleukodystrophy	Causative germline mutation	PEX1, PEX26			0.736651	0.387969	0.208472	0.361204	0.2345
3	Spasmodic Dystonia	Neuronal diseases	6	2	ANO3, GNAL	http://www.malacards.org/card/spasmodic_dystonia					0.736249	0.316219	0.162711	0.341619	0.218629
2.35	Epileptic Encephalopathy, Childhood-Onset	Neuronal diseases, Genetic diseases	16	1	CHD2	http://www.malacards.org/card/epileptic_encephalopathy_childhood_onset	Pathogenic, Causative mutation Ð Humsavar, Genetic Tests, Molecular basis known	CHD2			0.733851	0.488745	0.0232631	0.451318	0.0748528
4.39	Aarskog-Scott Syndrome	Skin diseases, Neuronal diseases, Cardiovascular diseases, Rare diseases, Fetal diseases, Genetic diseases	7	3	FGD3, FGD4, MCF2	http://www.malacards.org/card/aarskog_scott_syndrome					0.733263	0.309681	0.108279	0.388385	0.161562
6.9	Parkinson Disease, Late-Onset	Neuronal diseases, Mental diseases, Rare diseases, Genetic diseases, Metabolic diseases	118	6	CAT, DNAJC13, GRM1, GSTO2, IREB2, TBP	http://www.malacards.org/card/parkinson_disease_late_onset	Pathogenic	DNAJC13, TBP			0.732702	0.330693	0.206488	0.359024	0.155333
2.83	Parkinson Disease 21	Neuronal diseases, Mental diseases, Rare diseases, Genetic diseases, Metabolic diseases	1	1	DNAJC13	http://www.malacards.org/card/parkinson_disease_21	Pathogenic, Causative mutation Ð Humsavar, Molecular basis known	DNAJC13			0.731895	0.436209	0.191025	0.461826	0.17785
3.52	Microphthalmia	Eye diseases, Rare diseases, Fetal diseases	30	3	HMGB3, MITF, SOX2	http://www.malacards.org/card/microphthalmia					0.728875	0.475955	0.0951911	0.443156	0.102067
2.83	Seckel Syndrome 7	Neuronal diseases, Bone diseases, Rare diseases, Fetal diseases, Genetic diseases	1	1	NIN	http://www.malacards.org/card/seckel_syndrome_7	Pathogenic, Causative mutation Ð Humsavar, Molecular basis known	NIN			0.72798	0.390197	0.0931815	0.408397	0.106285
2.83	Microcephalic Primordial Dwarfism, Dauber Type	Neuronal diseases, Bone diseases, Rare diseases, Fetal diseases	1	1	NIN	http://www.malacards.org/card/microcephalic_primordial_dwarfism_dauber_type	Causative germline mutation	NIN			0.72798	0.390197	0.0931815	0.408397	0.106285
2.55	Short-Rib Thoracic Dysplasia 3 with or Without Polydactyly	Bone diseases, Respiratory diseases, Rare diseases, Fetal diseases, Genetic diseases	6	1	WDR60	http://www.malacards.org/card/short_rib_thoracic_dysplasia_3_with_or_without_polydactyly	Causative germline mutation	WDR60			0.726081	0.492283	0.264293	0.25195	0.286802
6.33	Asphyxiating Thoracic Dystrophy	Bone diseases, Respiratory diseases, Nephrological diseases, Rare diseases, Fetal diseases, Genetic diseases	24	4	EVC, KIAA0586, WDR19, WDR60	http://www.malacards.org/card/asphyxiating_thoracic_dystrophy	Genetic Tests, Causative germline mutation	WDR19, WDR60			0.725437	0.431091	0.129164	0.394094	0.154246
6.34	Leukemia, Acute Myeloid	Immune diseases, Blood diseases, Cancer diseases, Rare diseases, Genetic diseases	186	6	AFF1, BCL2, MLLT10, NCOA2, NSD1, RUNX1T1	http://www.malacards.org/card/leukemia_acute_myeloid	Genetic association, Genetic Tests, Molecular basis known	MLLT10, NSD1			0.725017	0.326427	0.130141	0.384501	0.146514
2.33	Kat6b-Related Disorders	Genetic diseases	1	1	KAT6B	http://www.malacards.org/card/kat6b_related_disorders	Genetic Tests	KAT6B			0.720647	0.390591	0.0893603	0.442478	0.187368
3.6	Ataxia	Neuronal diseases, Rare diseases, Genetic diseases	32	3	ATR, KCNA1, TBP	http://www.malacards.org/card/ataxia					0.719817	0.346232	0.147562	0.415574	0.126928
4.66	Glutaric Acidemia Iic	Neuronal diseases, Rare diseases, Genetic diseases, Metabolic diseases	14	2	ETFDH, MADD	http://www.malacards.org/card/glutaric_acidemia_iic	Pathogenic, Causative mutation Ð Humsavar, Molecular basis known	ETFDH, MADD			0.719743	0.396939	0.0975972	0.345837	0.22564
2.24	Lennox-Gastaut Syndrome	Neuronal diseases, Rare diseases, Genetic diseases	18	1	CHD2	http://www.malacards.org/card/lennox_gastaut_syndrome	Causative germline mutation	CHD2			0.719664	0.479296	0.0228134	0.442593	0.0734057
12.62	Huntington Disease	Neuronal diseases, Nephrological diseases, Rare diseases, Genetic diseases	308	20	ADD1, AGL, AHR, ASF1A, BAZ2B, BMI1, CDH8, ERGIC2, HAT1, KCNA1, KCNG3, KRIT1, MEF2A, NR3C1, PCNP, TAB2, TANK, TBP, TMEM123, UFL1	http://www.malacards.org/card/huntington_disease			Blood, Brain	AGL, AHR, ASF1A, BAZ2B, BMI1, CDH8, ERGIC2, HAT1, KCNA1, KCNG3, KRIT1, MEF2A, NR3C1, PCNP, TAB2, TANK, TMEM123, UFL1	0.716845	0.350071	0.148767	0.377705	0.136014
7.71	Hiv-1	Immune diseases, Genetic diseases	502	15	AGFG1, ANO3, ATF7IP, CENPU, DACH1, DYRK2, GNAL, ID4, KIF14, LIAS, LPIN1, MRPS31, PPP3CA, UFL1, ZC3H7B	http://www.malacards.org/card/hiv_1			Blood, Brain, Lymph	ANO3, ATF7IP, CENPU, DACH1, DYRK2, GNAL, ID4, KIF14, LIAS, LPIN1, MRPS31, PPP3CA, UFL1, ZC3H7B	0.716204	0.292307	0.158782	0.405897	0.166227
2.83	Microphthalmia, Syndromic 3	Endocrine diseases, Eye diseases, Neuronal diseases, Bone diseases, Ear diseases, Cardiovascular diseases, Mental diseases, Reproductive diseases, Respiratory diseases, Rare diseases, Fetal diseases, Genetic diseases	1	1	SOX2	http://www.malacards.org/card/microphthalmia_syndromic_3_2	Pathogenic, Genetic Tests, Molecular basis known, Causative germline mutation	SOX2			0.715681	0.53032	0.0098764	0.448017	0.0486663
2.83	Mental Retardation, Autosomal Dominant 21	Neuronal diseases, Mental diseases, Genetic diseases	1	1	CTCF	http://www.malacards.org/card/mental_retardation_autosomal_dominant_21	Pathogenic, Causative mutation Ð Humsavar, Molecular basis known	CTCF			0.70887	0.455095	0.0374283	0.433829	0.00430993
2.83	Intellectual Disability-Feeding Difficulties-Developmental Delay-Microcephaly Syndrome	Neuronal diseases, Rare diseases, Fetal diseases	1	1	CTCF	http://www.malacards.org/card/intellectual_disability_feeding_difficulties_developmental_delay_microcephaly_syndrome	Causative germline mutation	CTCF			0.70887	0.455095	0.0374283	0.433829	0.00430993
4.07	Hematologic Cancer	Immune diseases, Blood diseases, Cancer diseases	51	4	BMI1, CDKN1B, MLLT10, RUNX1T1	http://www.malacards.org/card/hematologic_cancer					0.707282	0.316509	0.131024	0.338788	0.166565
8.73	Myotonic Dystrophy 2	Endocrine diseases, Eye diseases, Neuronal diseases, Reproductive diseases, Muscle diseases, Rare diseases, Genetic diseases	324	15	AGL, APOPT1, BHLHE41, CISH, DDIT4, DYRK2, FGD4, RIF1, RUFY2, SCD5, TGFB2, TNIK, UACA, XPO4, ZC3H7B	http://www.malacards.org/card/myotonic_dystrophy_2			Skeletal Muscle	AGL, APOPT1, BHLHE41, CISH, DDIT4, DYRK2, FGD4, RIF1, RUFY2, SCD5, TGFB2, TNIK, UACA, XPO4, ZC3H7B	0.705479	0.33435	0.118375	0.375879	0.0862095
2.53	Hereditary Late-Onset Parkinson Disease	Neuronal diseases, Mental diseases, Rare diseases, Genetic diseases, Metabolic diseases	7	1	DNAJC13	http://www.malacards.org/card/hereditary_late_onset_parkinson_disease	Causative germline mutation	DNAJC13			0.70421	0.419709	0.183799	0.444357	0.171123
5.83	Wilms Tumor Susceptibility-5	Nephrological diseases, Cancer diseases, Rare diseases, Genetic diseases	55	5	BRCA2, CTCF, CTNNB1, RBBP7, WTAP	http://www.malacards.org/card/wilms_tumor_susceptibility_5	Pathogenic, Molecular basis known	BRCA2			0.703818	0.422854	0.0695043	0.409622	0.118394
3	Ampulla of Vater Adenocarcinoma	Gastrointestinal diseases, Cancer diseases	7	2	BRCA2, SOX2	http://www.malacards.org/card/ampulla_of_vater_adenocarcinoma					0.703344	0.492693	0.0551422	0.449437	0.137504
2.83	Gapo Syndrome	Skin diseases, Eye diseases, Neuronal diseases, Oral diseases, Rare diseases, Fetal diseases, Genetic diseases	2	1	ATR	http://www.malacards.org/card/gapo_syndrome	Molecular basis known	ATR			0.702032	0.343294	0.0961784	0.499847	0.0933703
2.83	Familial Cutaneous Telangiectasia and Oropharyngeal Predisposition Cancer Syndrome	Skin diseases, Cancer diseases, Rare diseases, Genetic diseases	1	1	ATR	http://www.malacards.org/card/familial_cutaneous_telangiectasia_and_oropharyngeal_predisposition_cancer_syndrome	Causative germline mutation	ATR			0.702032	0.343294	0.0961784	0.499847	0.0933703
2.83	Cutaneous Telangiectasia and Cancer Syndrome, Familial	Cancer diseases, Genetic diseases	2	1	ATR	http://www.malacards.org/card/cutaneous_telangiectasia_and_cancer_syndrome_familial	Pathogenic, Causative mutation Ð Humsavar, Genetic Tests, Molecular basis known	ATR			0.702032	0.343294	0.0961784	0.499847	0.0933703
2.83	Seckel Syndrome 1	Neuronal diseases, Bone diseases, Rare diseases, Fetal diseases, Genetic diseases	2	1	ATR	http://www.malacards.org/card/seckel_syndrome_1	Pathogenic, Genetic Tests, Molecular basis known	ATR			0.702032	0.343294	0.0961784	0.499847	0.0933703
2.57	Dystonia	Neuronal diseases, Ear diseases, Muscle diseases, Rare diseases, Genetic diseases	22	2	ANO3, GNAL	http://www.malacards.org/card/dystonia					0.699727	0.300533	0.15464	0.324674	0.207784
3.8	Charcot-Marie-Tooth Neuropathy Type 4	Neuronal diseases, Ear diseases, Mental diseases, Rare diseases, Genetic diseases	12	2	FGD4, GDAP1	http://www.malacards.org/card/charcot_marie_tooth_neuropathy_type_4	Genetic Tests	FGD4, GDAP1			0.699485	0.344147	0.169275	0.364082	0.146192
10.94	Alzheimer Disease	Neuronal diseases, Mental diseases, Rare diseases, Genetic diseases	565	23	ABCC11, CAT, CDH8, CEP152, CEP70, CNTN4, DENND5B, FLRT3, FOXO3, FRMD4A, GPR161, GRIA1, KIAA1549, LACE1, LRRTM1, MAGI1, PANX2, PCSK2, PLAU, RASEF, RBM43, TCF20, TPD52L1	http://www.malacards.org/card/alzheimer_disease			Blood	ABCC11, CDH8, CEP152, CEP70, CNTN4, DENND5B, FLRT3, FOXO3, GPR161, KIAA1549, LACE1, LRRTM1, MAGI1, PANX2, PCSK2, RASEF, RBM43, TCF20, TPD52L1	0.699346	0.366214	0.0894687	0.376248	0.0849523
9.16	Hepatosplenic T-Cell Lymphoma	Immune diseases, Liver diseases, Blood diseases, Cancer diseases, Rare diseases	403	17	ADGRL4, AMIGO2, AQP3, BHLHE41, CCNE2, CENPU, FLRT3, GALNT15, JAKMIP2, KIF14, LGR4, PROX1, RTN1, RUNDC3B, SOX2, STOX2, TTK	http://www.malacards.org/card/hepatosplenic_t_cell_lymphoma			Spleen	ADGRL4, AMIGO2, AQP3, BHLHE41, CCNE2, CENPU, FLRT3, GALNT15, JAKMIP2, KIF14, LGR4, PROX1, RTN1, RUNDC3B, SOX2, STOX2, TTK	0.697654	0.336064	0.130747	0.336105	0.189434
3.3	Brain Cancer	Neuronal diseases, Cancer diseases, Rare diseases	32	3	BMI1, CTNNB1, SOX2	http://www.malacards.org/card/brain_cancer					0.696249	0.407074	0.0669713	0.443279	0.0963145
3.75	Zellweger Spectrum	Rare diseases, Genetic diseases, Metabolic diseases	13	2	PEX1, PEX26	http://www.malacards.org/card/zellweger_spectrum	Genetic Tests	PEX1, PEX26			0.69579	0.339198	0.164902	0.419909	0.182993
2.83	Diabetes Mellitus, Noninsulin-Dependent, 5	Endocrine diseases, Genetic diseases, Metabolic diseases	1	1	TBC1D4	http://www.malacards.org/card/diabetes_mellitus_noninsulin_dependent_5	Pathogenic	TBC1D4			0.694516	0.323645	0.134042	0.332673	0.170157
3.62	Refsum Disease	Skin diseases, Eye diseases, Neuronal diseases, Rare diseases, Genetic diseases, Metabolic diseases	20	3	CAT, PEX1, PEX26	http://www.malacards.org/card/refsum_disease					0.694236	0.365631	0.196469	0.340407	0.220998
7.12	Cranioectodermal Dysplasia 1	Skin diseases, Bone diseases, Respiratory diseases, Nephrological diseases, Rare diseases, Fetal diseases, Genetic diseases	14	4	EVC, EVC2, IFT122, WDR19	http://www.malacards.org/card/cranioectodermal_dysplasia_1	Pathogenic, Causative mutation Ð Humsavar, Molecular basis known, Causative germline mutation	IFT122, WDR19			0.694169	0.39099	0.112386	0.375025	0.101262
2.83	Deafness Enamel Hypoplasia Nail Defects	Skin diseases, Ear diseases, Oral diseases, Rare diseases, Fetal diseases	2	1	PEX1	http://www.malacards.org/card/deafness_enamel_hypoplasia_nail_defects	Causative germline mutation	PEX1			0.693993	0.296335	0.244979	0.345608	0.265105
2.83	Heimler Syndrome 1	Ear diseases, Genetic diseases	1	1	PEX1	http://www.malacards.org/card/heimler_syndrome_1	Pathogenic, Molecular basis known	PEX1			0.693993	0.296335	0.244979	0.345608	0.265105
2.83	Peroxisome Biogenesis Disorder 11b	Endocrine diseases, Eye diseases, Neuronal diseases, Liver diseases, Nephrological diseases, Rare diseases, Fetal diseases, Genetic diseases, Metabolic diseases	2	1	PEX1	http://www.malacards.org/card/peroxisome_biogenesis_disorder_11b	Molecular basis known	PEX1			0.693993	0.296335	0.244979	0.345608	0.265105
2.83	Peroxisome Biogenesis Disorder 11a	Endocrine diseases, Eye diseases, Neuronal diseases, Liver diseases, Nephrological diseases, Rare diseases, Fetal diseases, Genetic diseases, Metabolic diseases	2	1	PEX1	http://www.malacards.org/card/peroxisome_biogenesis_disorder_11a	Molecular basis known	PEX1			0.693993	0.296335	0.244979	0.345608	0.265105
2.83	Peroxisome Biogenesis Disorder 1a	Endocrine diseases, Eye diseases, Neuronal diseases, Liver diseases, Nephrological diseases, Rare diseases, Fetal diseases, Genetic diseases, Metabolic diseases	1	1	PEX1	http://www.malacards.org/card/peroxisome_biogenesis_disorder_1a	Causative mutation Ð Humsavar, Molecular basis known	PEX1			0.693993	0.296335	0.244979	0.345608	0.265105
2.84	Diabetic Cataract	Eye diseases	9	2	CAT, NIN	http://www.malacards.org/card/diabetic_cataract					0.692959	0.395333	0.174279	0.285846	0.199226
4.35	Leber Congenital Amaurosis	Eye diseases, Neuronal diseases, Rare diseases, Genetic diseases	86	3	LCA5, PEX1, RPGR	http://www.malacards.org/card/leber_congenital_amaurosis	Pathogenic, Causative germline mutation	LCA5, PEX1			0.692925	0.374641	0.172076	0.383649	0.156024
3.78	Polycystic Kidney Disease, Autosomal Dominant	Nephrological diseases, Rare diseases, Genetic diseases	7	2	PCSK2, PKD2	http://www.malacards.org/card/polycystic_kidney_disease_autosomal_dominant	Genetic Tests	PKD2			0.691998	0.353265	0.00649786	0.443571	0.0383713
2.83	Hypogonadotropic Hypogonadism 21 with Anosmia	Genetic diseases	1	1	FLRT3	http://www.malacards.org/card/hypogonadotropic_hypogonadism_21_with_anosmia	Causative mutation Ð Humsavar, Molecular basis known	FLRT3			0.689758	0.520078	0.000187614	0.491797	0.0841505
21.13	Breast Cancer	Reproductive diseases, Cancer diseases, Rare diseases, Genetic diseases	738	35	ABCC11, ACSS1, AHR, AMPH, ARFGEF3, ATR, BCAR3, BCL2, BIN1, BRCA2, CDKN1B, CDS1, CENPU, CTCF, CTNNB1, EMSY, FAR2, FLT1, GDAP1, ID4, ING1, IREB2, IRS1, KIAA1217, MLH1, MLLT10, NR3C1, PDE7B, PLAU, QSER1, RABL3, SGK3, SLC27A6, THBS2, ULK4	http://www.malacards.org/card/breast_cancer	Causative mutation Ð Humsavar	BRCA2	Breast	ACSS1, BIN1, CENPU, FAR2, GDAP1, ID4, IREB2, KIAA1217, MLLT10, PDE7B, QSER1, RABL3, SLC27A6, THBS2, ULK4	0.689591	0.297931	0.134876	0.346569	0.135747
4.23	Episodic Ataxia/myokymia Syndrome	Neuronal diseases, Rare diseases, Genetic diseases	7	2	KCNA1, SYT14	http://www.malacards.org/card/episodic_ataxia_myokymia_syndrome	Pathogenic, Causative mutation Ð Humsavar, Genetic Tests, Molecular basis known, Causative germline mutation	KCNA1			0.689056	0.354175	0.0641855	0.35383	0.0803783
7.48	Myotonic Dystrophy 1	Endocrine diseases, Eye diseases, Neuronal diseases, Reproductive diseases, Muscle diseases, Rare diseases, Genetic diseases	273	13	AGL, APOPT1, BAZ2B, CISH, DDIT4, RIF1, RIOK3, RUFY2, SCD5, TNIK, UACA, XPO4, ZC3H7B	http://www.malacards.org/card/myotonic_dystrophy_1			Skeletal Muscle	AGL, APOPT1, BAZ2B, CISH, DDIT4, RIF1, RIOK3, RUFY2, SCD5, TNIK, UACA, XPO4, ZC3H7B	0.687558	0.310617	0.0875102	0.368319	0.078408
12.66	Endometriosis	Reproductive diseases, Rare diseases	566	27	ASMTL, ATR, BBX, BIRC3, CCNE2, CDS1, CENPU, CEP70, DBF4, DMXL2, EPB41L4B, IVNS1ABP, KLF5, KRIT1, LGR4, LMO3, MYLK, PIK3C2A, PLEKHF2, RAD51AP1, RNF146, SHANK2, SLC26A4, TANK, TTK, UFL1, ZFHX4	http://www.malacards.org/card/endometriosis			Uterus	ASMTL, ATR, BBX, BIRC3, CCNE2, CDS1, CENPU, CEP70, DBF4, DMXL2, EPB41L4B, IVNS1ABP, KLF5, KRIT1, LGR4, LMO3, MYLK, PIK3C2A, PLEKHF2, RAD51AP1, RNF146, SHANK2, SLC26A4, TANK, TTK, UFL1, ZFHX4	0.687119	0.287063	0.155792	0.339872	0.155549
5.67	Charcot-Marie-Tooth Disease, Type 4a	Neuronal diseases, Ear diseases, Muscle diseases, Rare diseases, Fetal diseases, Genetic diseases, Metabolic diseases	2	2	GDAP1, JPH1	http://www.malacards.org/card/charcot_marie_tooth_disease_type_4a	Pathogenic, Causative mutation Ð Humsavar, Genetic Tests, Molecular basis known, Causative germline mutation	GDAP1, JPH1			0.686924	0.360291	0.179974	0.321824	0.121998
5.67	Charcot-Marie-Tooth Disease, Recessive Intermediate, a	Neuronal diseases, Ear diseases, Muscle diseases, Rare diseases, Fetal diseases, Genetic diseases, Metabolic diseases	2	2	GDAP1, JPH1	http://www.malacards.org/card/charcot_marie_tooth_disease_recessive_intermediate_a	Pathogenic, Causative mutation Ð Humsavar, Molecular basis known	GDAP1, JPH1			0.686924	0.360291	0.179974	0.321824	0.121998
5.67	Charcot-Marie-Tooth Disease, Axonal, with Vocal Cord Paresis	Neuronal diseases, Genetic diseases	2	2	GDAP1, JPH1	http://www.malacards.org/card/charcot_marie_tooth_disease_axonal_with_vocal_cord_paresis	Pathogenic, Causative mutation Ð Humsavar, Genetic Tests, Molecular basis known	GDAP1, JPH1			0.686924	0.360291	0.179974	0.321824	0.121998
5.67	Charcot-Marie-Tooth Disease, Axonal, Type 2k	Neuronal diseases, Rare diseases, Genetic diseases	2	2	GDAP1, JPH1	http://www.malacards.org/card/charcot_marie_tooth_disease_axonal_type_2k	Pathogenic, Causative mutation Ð Humsavar, Molecular basis known	GDAP1, JPH1			0.686924	0.360291	0.179974	0.321824	0.121998
2.83	Alacrimia-Choreoathetosis-Liver Dysfunction Syndrome	Liver diseases, Rare diseases, Metabolic diseases	1	1	NGLY1	http://www.malacards.org/card/alacrimia_choreoathetosis_liver_dysfunction_syndrome	Causative germline mutation	NGLY1			0.686826	0.399046	0.0224592	0.50207	0.137365
2.83	Congenital Disorder of Deglycosylation	Genetic diseases	1	1	NGLY1	http://www.malacards.org/card/congenital_disorder_of_deglycosylation	Pathogenic, Molecular basis known	NGLY1			0.686826	0.399046	0.0224592	0.50207	0.137365
4.21	Beckwith-Wiedemann Syndrome	Nephrological diseases, Cancer diseases, Rare diseases, Fetal diseases, Genetic diseases	30	3	CTCF, NSD1, TSSC4	http://www.malacards.org/card/beckwith_wiedemann_syndrome	Pathogenic, Genetic Tests, Molecular basis known	NSD1			0.686379	0.419378	0.175896	0.324657	0.128142
5.7	Charcot-Marie-Tooth Disease	Neuronal diseases, Ear diseases, Muscle diseases, Rare diseases, Fetal diseases, Genetic diseases, Metabolic diseases	70	5	FGD4, GDAP1, JPH1, MFN1, PDK3	http://www.malacards.org/card/charcot_marie_tooth_disease	Pathogenic	GDAP1			0.686341	0.284282	0.225669	0.322992	0.146904
2.42	Torsion Dystonia	Muscle diseases, Rare diseases, Genetic diseases	19	2	ANO3, GNAL	http://www.malacards.org/card/torsion_dystonia					0.684201	0.293865	0.151209	0.317469	0.203174
5.88	Hepatitis C Virus	Skin diseases, Immune diseases, Gastrointestinal diseases, Liver diseases, Rare diseases, Genetic diseases, Infectious diseases	465	12	AIG1, ARNTL, BIRC3, C1orf21, CENPU, CHD2, DYRK2, EPC1, HPS3, LARP1B, RUFY2, UBA6	http://www.malacards.org/card/hepatitis_c_virus			Liver	AIG1, ARNTL, BIRC3, C1orf21, CENPU, CHD2, DYRK2, EPC1, HPS3, LARP1B, RUFY2, UBA6	0.683532	0.304047	0.176252	0.359979	0.153795
5.9	Myocardial Infarction	Cardiovascular diseases, Genetic diseases	163	6	FLT1, GUCY1A3, MEF2A, PIK3C2A, PLAU, THBS2	http://www.malacards.org/card/myocardial_infarction	Pathogenic	GUCY1A3			0.683398	0.333612	0.137534	0.314363	0.124435
3.6	Ovarian Carcinosarcoma	Cancer diseases, Rare diseases	20	3	BRCA2, CEP70, IRS1	http://www.malacards.org/card/ovarian_carcinosarcoma					0.682601	0.321505	0.161321	0.373383	0.200912
6.54	Hereditary Spastic Paraplegia	Eye diseases, Neuronal diseases, Bone diseases, Mental diseases, Gastrointestinal diseases, Rare diseases, Genetic diseases, Metabolic diseases	236	10	AGL, ALS2, ANKRD28, CLASP2, EIF5, LPIN1, PKIA, PRDX3, RAB4A, SGCB	http://www.malacards.org/card/hereditary_spastic_paraplegia			Skeletal Muscle	AGL, ANKRD28, CLASP2, EIF5, LPIN1, PKIA, PRDX3, RAB4A, SGCB	0.682171	0.286375	0.187713	0.324441	0.131147
7.02	Obesity	Genetic diseases, Metabolic diseases	562	12	CALM1, DSC2, FGFR1OP2, GNA11, IRS1, MCF2, N4BP2, NLGN4X, NR3C1, PEX1, SCD5, TAF5	http://www.malacards.org/card/obesity			Adipose, Blood, Liver	CALM1, DSC2, FGFR1OP2, GNA11, MCF2, N4BP2, NLGN4X, PEX1, TAF5	0.681593	0.288939	0.154713	0.275648	0.173062
3.32	Ptosis, Congenital	Eye diseases, Rare diseases, Genetic diseases	7	2	MBD5, ZFHX4	http://www.malacards.org/card/ptosis_congenital	Unconfirmed association	ZFHX4			0.680728	0.257315	0.0703533	0.339343	0.0766592
2.62	Urethra Clear Cell Adenocarcinoma	Cancer diseases	13	2	ANKRD28, ARID2	http://www.malacards.org/card/urethra_clear_cell_adenocarcinoma					0.680659	0.430517	0.0931142	0.43392	0.0901874
2.62	Urethra Adenocarcinoma	Cancer diseases	13	2	ANKRD28, ARID2	http://www.malacards.org/card/urethra_adenocarcinoma					0.680659	0.430517	0.0931142	0.43392	0.0901874
2.62	Urethral Benign Neoplasm	Cancer diseases, Rare diseases	13	2	ANKRD28, ARID2	http://www.malacards.org/card/urethral_benign_neoplasm					0.680659	0.430517	0.0931142	0.43392	0.0901874
2.83	Polymicrogyria with Seizures	Genetic diseases	1	1	RTTN	http://www.malacards.org/card/polymicrogyria_with_seizures	Pathogenic, Causative mutation Ð Humsavar, Genetic Tests, Molecular basis known	RTTN			0.679479	0.346534	0.362842	0.372355	0.220831
2.83	Bilateral Generalized Polymicrogyria	Neuronal diseases, Rare diseases, Fetal diseases	1	1	RTTN	http://www.malacards.org/card/bilateral_generalized_polymicrogyria	Causative germline mutation	RTTN			0.679479	0.346534	0.362842	0.372355	0.220831
5.92	Grn-Related Frontotemporal Dementia	Neuronal diseases, Mental diseases, Rare diseases, Genetic diseases	276	10	AMPH, ANO3, FHL5, ID4, NRIP3, PCSK2, RTN1, SHANK2, TAGLN3, VEZF1	http://www.malacards.org/card/grn_related_frontotemporal_dementia					0.677956	0.333215	0.0983843	0.310233	0.142872
5.94	Adrenoleukodystrophy	Skin diseases, Endocrine diseases, Neuronal diseases, Reproductive diseases, Rare diseases, Genetic diseases, Metabolic diseases	22	5	ABCD2, CAT, PEX1, PEX26, SLC25A17	http://www.malacards.org/card/adrenoleukodystrophy					0.677937	0.31741	0.195381	0.293004	0.204195
2.83	Charcot-Marie-Tooth Disease, Type 4h	Neuronal diseases, Ear diseases, Muscle diseases, Rare diseases, Fetal diseases, Genetic diseases, Metabolic diseases	1	1	FGD4	http://www.malacards.org/card/charcot_marie_tooth_disease_type_4h	Pathogenic, Causative mutation Ð Humsavar, Genetic Tests, Molecular basis known, Causative germline mutation	FGD4			0.677772	0.334142	0.0914993	0.397175	0.077266
5.67	Autosomal Recessive Chorioretinopathy-Microcephaly Syndrome	Eye diseases, Neuronal diseases, Immune diseases, Mental diseases, Rare diseases, Genetic diseases	3	2	TUBGCP4, TUBGCP6	http://www.malacards.org/card/autosomal_recessive_chorioretinopathy_microcephaly_syndrome	Causative germline mutation	TUBGCP4, TUBGCP6			0.677263	0.278355	0.282757	0.256683	0.261085
2.83	Ocular Albinism	Eye diseases	9	2	MITF, SHROOM2	http://www.malacards.org/card/ocular_albinism					0.676239	0.37937	0.0834817	0.421973	0.110193
6.28	Peroxisome Biogenesis Disorder 1b	Endocrine diseases, Eye diseases, Neuronal diseases, Liver diseases, Nephrological diseases, Rare diseases, Fetal diseases, Genetic diseases, Metabolic diseases	23	4	CAT, PEX1, PEX26, SLC25A17	http://www.malacards.org/card/peroxisome_biogenesis_disorder_1b	Pathogenic, Causative mutation Ð Humsavar, Molecular basis known, Causative germline mutation	PEX1, PEX26			0.676019	0.339024	0.179145	0.289336	0.206355
7.3	Joubert Syndrome 1	Neuronal diseases, Nephrological diseases, Rare diseases, Fetal diseases, Genetic diseases	60	5	AHI1, C2CD3, KIAA0586, LCA5, RPGR	http://www.malacards.org/card/joubert_syndrome_1_2	Pathogenic, Causative mutation Ð Humsavar, Molecular basis known, Causative germline mutation	AHI1, C2CD3, KIAA0586			0.675369	0.372804	0.129617	0.399548	0.117041
2.83	Microphthalmia, Syndromic 13	Endocrine diseases, Eye diseases, Neuronal diseases, Bone diseases, Ear diseases, Cardiovascular diseases, Mental diseases, Reproductive diseases, Respiratory diseases, Rare diseases, Fetal diseases, Genetic diseases	1	1	HMGB3	http://www.malacards.org/card/microphthalmia_syndromic_13	Pathogenic, Genetic Tests	HMGB3			0.675117	0.433425	0.127597	0.408446	0.0669041
2.83	Helsmoortel-Van Der Aa Syndrome	Neuronal diseases, Mental diseases, Genetic diseases	1	1	ADNP	http://www.malacards.org/card/helsmoortel_van_der_aa_syndrome	Pathogenic, Molecular basis known	ADNP			0.674522	0.340634	0.0883624	0.308257	0.0647541
2.83	Adnp-Related Multiple Congenital Anomalies-Intellectual Disability-Autism Spectrum Disorder	Neuronal diseases, Rare diseases, Fetal diseases	1	1	ADNP	http://www.malacards.org/card/adnp_related_multiple_congenital_anomalies_intellectual_disability_autism_spectrum_disorder	Causative germline mutation	ADNP			0.674522	0.340634	0.0883624	0.308257	0.0647541
2.55	Polydactyly	Bone diseases, Rare diseases, Fetal diseases	18	2	EVC, WDR60	http://www.malacards.org/card/polydactyly					0.673988	0.40136	0.194446	0.334298	0.157882
16.89	Colorectal Cancer	Gastrointestinal diseases, Cancer diseases, Rare diseases, Genetic diseases	802	26	ATP11C, BCL2, BNIP3, BRCA2, CA7, CDKN1B, CTNNB1, DENND5B, DNM3, FLT1, GAS6, GNAL, IFT122, KIAA1211, KIAA1549, KLF5, MAGI1, MLH1, MLH3, PDCD4, PLAU, SLC11A1, STARD13, TGFB2, TTLL5, ZMIZ1	http://www.malacards.org/card/colorectal_cancer	Pathogenic, Causative mutation Ð Humsavar, Molecular basis known	CTNNB1, MLH3	Blood, Colon	ATP11C, CA7, DENND5B, DNM3, GAS6, GNAL, IFT122, KIAA1211, KIAA1549, MAGI1, SLC11A1, STARD13, TGFB2, TTLL5, ZMIZ1	0.673886	0.297944	0.14399	0.359622	0.119249
3.43	Ocular Cancer	Eye diseases, Neuronal diseases, Cancer diseases	26	3	CDKN1B, GNA11, SOX2	http://www.malacards.org/card/ocular_cancer					0.673059	0.420213	0.0591843	0.297716	0.109036
5.46	Colorectal Adenoma	Gastrointestinal diseases, Cancer diseases, Genetic diseases	366	10	ATF7IP, CA7, CTNNB1, KIAA1549, KLHL32, MLH1, NPC1, SUGCT, USP24, WWC1	http://www.malacards.org/card/colorectal_adenoma			Colon	ATF7IP, CA7, KIAA1549, KLHL32, NPC1, SUGCT, USP24, WWC1	0.673016	0.331259	0.132043	0.365051	0.107575
2.48	Dna Ligase Iv Deficiency	Immune diseases	17	2	ATR, XRCC6	http://www.malacards.org/card/dna_ligase_iv_deficiency					0.671445	0.342773	0.154097	0.416967	0.0812449
11.86	Prostate Cancer	Reproductive diseases, Cancer diseases, Rare diseases, Genetic diseases	682	19	BCL2, BNIP3, BRCA2, CAT, CDKN1B, CDS1, CTNNB1, CXorf57, FAR2, GLO1, GNAL, MAP7, MXI1, PLAU, PLCL2, PPP3CA, TACC2, TMEM246, TPD52L1	http://www.malacards.org/card/prostate_cancer	Pathogenic, Causative mutation Ð Humsavar, Susceptibility factor	BRCA2, CTNNB1, MXI1	Bone, Prostate	BNIP3, CAT, CDS1, CXorf57, FAR2, GLO1, GNAL, MAP7, PLCL2, PPP3CA, TACC2, TMEM246, TPD52L1	0.671268	0.302011	0.12332	0.335709	0.130413
12.22	Cervical Cancer, Somatic	Reproductive diseases, Cancer diseases, Genetic diseases	357	22	ABCG1, AGL, ANKLE2, AVL9, BCL2, BIVM, CCNE2, CDKN1B, DBF4, DDIT4, DSC2, FLRT3, HAT1, HPS3, ID4, KIF14, LARP1B, MIS18A, RAD51AP1, RASEF, TBL1XR1, TNFAIP8	http://www.malacards.org/card/cervical_cancer_somatic			Uterus	ABCG1, AGL, ANKLE2, AVL9, BIVM, CCNE2, DBF4, DDIT4, DSC2, FLRT3, HAT1, HPS3, ID4, KIF14, LARP1B, MIS18A, RAD51AP1, RASEF, TBL1XR1, TNFAIP8	0.671171	0.314181	0.150762	0.331894	0.12074
3.42	Influenza	Respiratory diseases, Genetic diseases, Infectious diseases	434	7	EPHA4, FGD4, IVNS1ABP, RTN1, TBC1D4, TRAF5, TUBGCP6	http://www.malacards.org/card/influenza			Blood	EPHA4, FGD4, RTN1, TBC1D4, TRAF5, TUBGCP6	0.670377	0.327814	0.108065	0.40395	0.123914
2.83	Cranio-Cervical Dystonia with Laryngeal and Upper-Limb Involvement	Neuronal diseases, Rare diseases	1	1	ANO3	http://www.malacards.org/card/cranio_cervical_dystonia_with_laryngeal_and_upper_limb_involvement	Causative germline mutation	ANO3			0.669847	0.292723	0.189567	0.168801	0.331574
2.83	Dystonia 24	Neuronal diseases, Ear diseases, Muscle diseases, Rare diseases, Genetic diseases	1	1	ANO3	http://www.malacards.org/card/dystonia_24	Pathogenic, Causative mutation Ð Humsavar, Genetic Tests, Molecular basis known	ANO3			0.669847	0.292723	0.189567	0.168801	0.331574
2.83	Basal Ganglia Calcification, Idiopathic, 1	Neuronal diseases, Genetic diseases	2	1	SLC20A2	http://www.malacards.org/card/basal_ganglia_calcification_idiopathic_1	Pathogenic, Causative mutation Ð Humsavar, Molecular basis known	SLC20A2			0.668561	0.325589	0.101621	0.556911	0.0352331
3.11	Uveal Melanoma	Skin diseases, Eye diseases, Neuronal diseases, Cancer diseases, Rare diseases, Genetic diseases	34	2	GNA11, MITF	http://www.malacards.org/card/uveal_melanoma	Causative somatic mutation, Genetic Tests	GNA11			0.668083	0.370118	0.105223	0.313999	0.160006
6.04	Tongue Squamous Cell Carcinoma	Skin diseases, Oral diseases, Cancer diseases, Rare diseases	278	10	BCL2, BMI1, CTNNB1, EPB41L4B, ID4, IGF2BP2, IRS1, LPIN1, MGLL, PLAU	http://www.malacards.org/card/tongue_squamous_cell_carcinoma			Oral Cavity	EPB41L4B, ID4, IGF2BP2, IRS1, LPIN1, MGLL, PLAU	0.667913	0.24288	0.138289	0.363211	0.133048
2.83	Waardenburg Syndrome, Type 2a	Skin diseases, Eye diseases, Ear diseases, Rare diseases, Fetal diseases, Genetic diseases	2	1	MITF	http://www.malacards.org/card/waardenburg_syndrome_type_2a_2	Pathogenic, Causative mutation Ð Humsavar, Genetic Tests, Molecular basis known	MITF			0.667764	0.384632	0.126207	0.395984	0.168944
2.83	Waardenburg Syndrome, Type 2e, with or Without Neurologic Involvement	Skin diseases, Eye diseases, Neuronal diseases, Ear diseases, Rare diseases, Fetal diseases, Genetic diseases	3	1	MITF	http://www.malacards.org/card/waardenburg_syndrome_type_2e_with_or_without_neurologic_involvement	Causative germline mutation	MITF			0.667764	0.384632	0.126207	0.395984	0.168944
2.83	Waardenburg Syndrome/ocular Albinism, Digenic	Ear diseases, Genetic diseases	2	1	MITF	http://www.malacards.org/card/waardenburg_syndrome_ocular_albinism_digenic	Molecular basis known	MITF			0.667764	0.384632	0.126207	0.395984	0.168944
2.83	Ocular Albinism with Congenital Sensorineural Deafness	Eye diseases, Ear diseases, Rare diseases, Fetal diseases, Metabolic diseases	2	1	MITF	http://www.malacards.org/card/ocular_albinism_with_congenital_sensorineural_deafness	Causative germline mutation	MITF			0.667764	0.384632	0.126207	0.395984	0.168944
2.83	Albinism, Oculocutaneous, Type Ib	Skin diseases, Eye diseases, Rare diseases, Genetic diseases, Metabolic diseases	2	1	MITF	http://www.malacards.org/card/albinism_oculocutaneous_type_ib	Molecular basis known	MITF			0.667764	0.384632	0.126207	0.395984	0.168944
2.83	Melanoma, Cutaneous Malignant 8	Skin diseases, Nephrological diseases, Cancer diseases, Genetic diseases	2	1	MITF	http://www.malacards.org/card/melanoma_cutaneous_malignant_8	Pathogenic, Causative mutation Ð Humsavar	MITF			0.667764	0.384632	0.126207	0.395984	0.168944
2.83	Albinism, Oculocutaneous, Type Ia	Skin diseases, Eye diseases, Rare diseases, Genetic diseases, Metabolic diseases	2	1	MITF	http://www.malacards.org/card/albinism_oculocutaneous_type_ia	Molecular basis known	MITF			0.667764	0.384632	0.126207	0.395984	0.168944
2.33	Sox2-Related Eye Disorders	Genetic diseases	2	1	SOX2	http://www.malacards.org/card/sox2_related_eye_disorders	Genetic Tests	SOX2			0.667169	0.494372	0.00920694	0.417648	0.0453675
1.95	Noonan Syndrome 1	Skin diseases, Endocrine diseases, Eye diseases, Cardiovascular diseases, Reproductive diseases, Nephrological diseases, Cancer diseases, Rare diseases, Fetal diseases, Genetic diseases	35	1	KAT6B	http://www.malacards.org/card/noonan_syndrome_1	Causative germline mutation	KAT6B			0.666735	0.36137	0.0826752	0.409375	0.173351
2.83	Medulloblastoma, Ptch2-Related	Neuronal diseases, Cancer diseases, Rare diseases, Genetic diseases	2	1	BRCA2	http://www.malacards.org/card/medulloblastoma_ptch2_related	Pathogenic	BRCA2			0.665876	0.439478	0.0952203	0.434151	0.215078
2.83	Pancreatic Cancer 2	Endocrine diseases, Gastrointestinal diseases, Cancer diseases, Rare diseases, Genetic diseases	1	1	BRCA2	http://www.malacards.org/card/pancreatic_cancer_2	Pathogenic	BRCA2			0.665876	0.439478	0.0952203	0.434151	0.215078
2.83	Fanconi Anemia, Complementation Group D1	Skin diseases, Rare diseases, Genetic diseases	1	1	BRCA2	http://www.malacards.org/card/fanconi_anemia_complementation_group_d1	Causative mutation Ð Humsavar, Molecular basis known	BRCA2			0.665876	0.439478	0.0952203	0.434151	0.215078
2.83	Inherited Cancer-Predisposing Syndrome Due to Biallelic Brca2 Mutations	Nephrological diseases, Cancer diseases, Rare diseases	1	1	BRCA2	http://www.malacards.org/card/inherited_cancer_predisposing_syndrome_due_to_biallelic_brca2_mutations	Causative germline mutation	BRCA2			0.665876	0.439478	0.0952203	0.434151	0.215078
2.83	Glioblastoma 3	Neuronal diseases, Cancer diseases, Rare diseases, Genetic diseases	1	1	BRCA2	http://www.malacards.org/card/glioblastoma_3	Pathogenic	BRCA2			0.665876	0.439478	0.0952203	0.434151	0.215078
2.79	Primary Familial Brain Calcification	Neuronal diseases, Rare diseases, Genetic diseases	4	1	SLC20A2	http://www.malacards.org/card/primary_familial_brain_calcification	Genetic Tests, Causative germline mutation	SLC20A2			0.665485	0.324091	0.101154	0.554349	0.035071
2.83	Leber Congenital Amaurosis 5	Eye diseases, Neuronal diseases, Rare diseases, Genetic diseases	2	1	LCA5	http://www.malacards.org/card/leber_congenital_amaurosis_5	Pathogenic, Molecular basis known	LCA5			0.665104	0.470893	0.103756	0.393741	0.04822
2.83	Muscular Dystrophy, Limb-Girdle, Type 2c	Neuronal diseases, Muscle diseases, Rare diseases, Genetic diseases, Metabolic diseases	2	1	SCG3	http://www.malacards.org/card/muscular_dystrophy_limb_girdle_type_2c	Molecular basis known	SCG3			0.66453	0.295716	0.0575483	0.390743	0.0943632
4.36	Wilms Tumor		334	9	BRCA2, CCNE2, FGF9, KIAA1211, KIF14, PLK4, RAD51AP1, SHANK2, TTK	http://www.malacards.org/card/wilms_tumor			Kidney	BRCA2, CCNE2, FGF9, KIAA1211, KIF14, PLK4, RAD51AP1, SHANK2, TTK	0.663842	0.290468	0.126069	0.341067	0.188103
2.52	Chilblain Lupus	Skin diseases, Immune diseases, Rare diseases, Genetic diseases	14	2	MB21D1, RAB4A	http://www.malacards.org/card/chilblain_lupus					0.66372	0.297015	0.0836619	0.41748	0.0203762
4.95	Systemic Lupus Erythematosus	Skin diseases, Bone diseases, Immune diseases, Rare diseases, Genetic diseases	338	8	C1orf21, CAT, CDC42EP3, FGF9, FOXO3, GAS6, USP4, XRCC6	http://www.malacards.org/card/systemic_lupus_erythematosus			Blood	C1orf21, CDC42EP3, FGF9, FOXO3, USP4	0.662436	0.330083	0.123279	0.308222	0.114791
2.79	Severe Early-Childhood-Onset Retinal Dystrophy	Eye diseases, Rare diseases	4	1	LCA5	http://www.malacards.org/card/severe_early_childhood_onset_retinal_dystrophy	Causative germline mutation	LCA5			0.662044	0.468727	0.103279	0.39193	0.0479982
2.83	Continuous Muscle Fiber Activity Hereditary	Neuronal diseases, Rare diseases	1	1	KCNA1	http://www.malacards.org/card/continuous_muscle_fiber_activity_hereditary	Causative germline mutation	KCNA1			0.66101	0.407182	0.0998125	0.25515	0.140134
2.83	Isolated Autosomal Dominant Hypomagnesemia, Glaudemans Type	Nephrological diseases, Rare diseases, Metabolic diseases	1	1	KCNA1	http://www.malacards.org/card/isolated_autosomal_dominant_hypomagnesemia_glaudemans_type	Causative germline mutation	KCNA1			0.66101	0.407182	0.0998125	0.25515	0.140134
4.31	Ovarian Cancer, Somatic	Cancer diseases, Genetic diseases	14	2	BRCA2, CTNNB1	http://www.malacards.org/card/ovarian_cancer_somatic	Pathogenic, Causative mutation Ð Humsavar, Molecular basis known	BRCA2, CTNNB1			0.659136	0.430416	0.0473807	0.432723	0.123258
11.66	Neuroblastoma	Neuronal diseases, Cancer diseases, Rare diseases, Genetic diseases	985	26	ACSS1, AQP3, BCL2, BHLHE41, C2CD3, CDKN1B, CDS1, CTNNB1, DDIT4, DNM3, EPB41L4B, FLRT3, FRMD4A, IGF2BP2, KIAA1211, LGR4, NAV2, RTN1, RUFY2, RUNX1T1, SCG3, SIPA1L1, SKIL, SLC46A3, TAGLN3, TPD52L1	http://www.malacards.org/card/neuroblastoma			Adrenal Gland, Blood	ACSS1, AQP3, BCL2, BHLHE41, C2CD3, CDKN1B, CDS1, DDIT4, DNM3, EPB41L4B, FLRT3, FRMD4A, IGF2BP2, KIAA1211, LGR4, RTN1, RUFY2, RUNX1T1, SCG3, SIPA1L1, SKIL, SLC46A3, TAGLN3, TPD52L1	0.6591	0.298557	0.0904612	0.312084	0.11727
7.6	Ellis-Van Creveld Syndrome	Skin diseases, Bone diseases, Cardiovascular diseases, Respiratory diseases, Rare diseases, Fetal diseases, Genetic diseases	11	4	EVC, EVC2, KIAA0586, WDR19	http://www.malacards.org/card/ellis_van_creveld_syndrome	Pathogenic, Causative mutation Ð Humsavar, Genetic Tests, Molecular basis known, Causative germline mutation	EVC, EVC2			0.658998	0.353223	0.0792774	0.393916	0.0999205
2.58	Eyelid Disease	Eye diseases	14	2	KAT6B, MBD5	http://www.malacards.org/card/eyelid_disease					0.658935	0.258961	0.0863204	0.355495	0.0857363
2.72	Apparent Mineralocorticoid Excess	Endocrine diseases, Cardiovascular diseases, Nephrological diseases, Rare diseases, Genetic diseases, Metabolic diseases	10	2	NR3C1, PIK3C2A	http://www.malacards.org/card/apparent_mineralocorticoid_excess					0.658664	0.362924	0.0531542	0.301668	0.114278
10.59	Neural Tube Defects	Neuronal diseases, Rare diseases, Genetic diseases	453	22	ABCD2, AHI1, ATF7IP, CACNA1D, CDS1, FAM84A, KLF5, MB21D1, NLGN4X, PANX2, PCMT1, PRIM2, PTPRR, RASEF, RCHY1, RGS17, RUNX1T1, SCG3, SLIT2, TXLNG, WWC1, ZNRF1	http://www.malacards.org/card/neural_tube_defects			Amnion	ABCD2, AHI1, CACNA1D, CDS1, FAM84A, KLF5, MB21D1, NLGN4X, PANX2, PRIM2, PTPRR, RASEF, RCHY1, RGS17, RUNX1T1, SCG3, SLIT2, TXLNG, WWC1, ZNRF1	0.656878	0.269693	0.117326	0.30079	0.126595
9.26	Tuberous Sclerosis Complex		400	17	ARFGEF3, ARNTL, CALM1, DTNA, EPB41L4B, EPHA4, GALNT15, GDAP1, GNAL, GYG2, ID4, MCF2, PCSK2, PLCL2, PTPRR, TMEM30A, UNC13C	http://www.malacards.org/card/tuberous_sclerosis_complex			Brain	ARFGEF3, ARNTL, CALM1, DTNA, EPB41L4B, EPHA4, GALNT15, GDAP1, GNAL, GYG2, ID4, MCF2, PCSK2, PLCL2, PTPRR, TMEM30A, UNC13C	0.656745	0.284989	0.126451	0.3293	0.140632
2.83	Acatalasemia	Rare diseases, Genetic diseases, Metabolic diseases	3	1	CAT	http://www.malacards.org/card/acatalasemia	Pathogenic, Genetic Tests, Molecular basis known, Causative germline mutation	CAT			0.656373	0.397106	0.24614	0.173282	0.281584
2.95	Charcot-Marie-Tooth Neuropathy	Neuronal diseases, Ear diseases, Mental diseases, Rare diseases, Genetic diseases	33	2	FGD4, GDAP1	http://www.malacards.org/card/charcot_marie_tooth_neuropathy	Pathogenic	GDAP1			0.656067	0.322785	0.158768	0.341483	0.137118
5.67	Weyers Acrofacial Dysostosis	Skin diseases, Bone diseases, Rare diseases, Fetal diseases, Genetic diseases	2	2	EVC, EVC2	http://www.malacards.org/card/weyers_acrofacial_dysostosis	Pathogenic, Causative mutation Ð Humsavar, Genetic Tests, Molecular basis known, Causative germline mutation	EVC, EVC2			0.655331	0.313904	0.113372	0.396475	0.0735609
2.67	Mitf-Related Melanoma and Renal Cell Carcinoma Predisposition Syndrome	Skin diseases, Nephrological diseases, Cancer diseases, Rare diseases	1	1	MITF	http://www.malacards.org/card/mitf_related_melanoma_and_renal_cell_carcinoma_predisposition_syndrome	Susceptibility factor	MITF			0.654948	0.37725	0.123785	0.388384	0.165702
10.97	Dengue Disease	Rare diseases, Infectious diseases	415	21	ALDH1L2, CCNE2, CENPU, DENND5B, DSC2, FOXO3, FRMD4A, GAS6, HMGB3, IGF2BP2, IVNS1ABP, KIF14, MAP7, MLH3, MXI1, PIK3C2A, PLK4, RAD51AP1, RTN1, SULF2, TTK	http://www.malacards.org/card/dengue_disease			Blood	ALDH1L2, CCNE2, CENPU, DENND5B, DSC2, FOXO3, FRMD4A, GAS6, HMGB3, IGF2BP2, KIF14, MAP7, MLH3, MXI1, PLK4, RAD51AP1, RTN1, SULF2, TTK	0.654818	0.270845	0.136966	0.299158	0.174481
5.47	Li-Fraumeni Syndrome	Endocrine diseases, Neuronal diseases, Reproductive diseases, Cancer diseases, Rare diseases, Genetic diseases	25	4	BCL2, BRCA2, CDS1, MLH1	http://www.malacards.org/card/li_fraumeni_syndrome	Molecular basis known	CDS1			0.654154	0.201545	0.191994	0.366817	0.109227
2.76	Spinocerebellar Ataxia 17	Skin diseases, Eye diseases, Neuronal diseases, Ear diseases, Mental diseases, Rare diseases, Genetic diseases, Metabolic diseases	7	1	TBP	http://www.malacards.org/card/spinocerebellar_ataxia_17	Pathogenic, Molecular basis known, Causative germline mutation	TBP			0.654154	0.221104	0.213908	0.414733	0.120364
2.83	Urocanic Aciduria	Neuronal diseases, Rare diseases, Metabolic diseases	1	1	UROC1	http://www.malacards.org/card/urocanic_aciduria	Causative germline mutation	UROC1			0.65337	0.365234	0.0231946	0.263308	0.105193
2.83	Urocanase Deficiency	Rare diseases, Genetic diseases	1	1	UROC1	http://www.malacards.org/card/urocanase_deficiency	Pathogenic, Causative mutation Ð Humsavar, Genetic Tests	UROC1			0.65337	0.365234	0.0231946	0.263308	0.105193
2.67	Hereditary Site-Specific Ovarian Cancer Syndrome	Reproductive diseases, Cancer diseases, Rare diseases	2	1	BRCA2	http://www.malacards.org/card/hereditary_site_specific_ovarian_cancer_syndrome	Susceptibility factor	BRCA2			0.653096	0.431043	0.0933927	0.425818	0.21095
2.45	Sporadic Breast Cancer	Reproductive diseases, Cancer diseases, Rare diseases, Genetic diseases	18	2	BRCA2, EMSY	http://www.malacards.org/card/sporadic_breast_cancer					0.652909	0.398601	0.0629078	0.465851	0.128558
10.57	Multiple Sclerosis, Disease Progression, Modifier of	Neuronal diseases, Rare diseases, Genetic diseases	395	20	FAM84A, FGD4, HINT3, KIAA1217, KLF5, MAGI1, MLLT10, NONO, PLCL2, PPP3CA, PRIM2, QSER1, REEP3, RIF1, SGO2, SKIL, TBL1XR1, UBA6, UNC13C, WDR19	http://www.malacards.org/card/multiple_sclerosis_disease_progression_modifier_of			Blood, Spinal Cord	FAM84A, FGD4, HINT3, KIAA1217, KLF5, MAGI1, MLLT10, NONO, PLCL2, PPP3CA, PRIM2, QSER1, REEP3, RIF1, SGO2, SKIL, TBL1XR1, UBA6, UNC13C, WDR19	0.652464	0.277819	0.120872	0.336867	0.104668
3.99	Cell Type Cancer	Skin diseases, Respiratory diseases, Cancer diseases, Rare diseases, Genetic diseases	58	4	CTNNB1, MITF, MLH1, SOX2	http://www.malacards.org/card/cell_type_cancer					0.652165	0.349887	0.0933519	0.393093	0.0731077
3.46	Adams-Oliver Syndrome	Skin diseases, Bone diseases, Rare diseases, Fetal diseases, Genetic diseases	15	2	DLL4, ZC4H2	http://www.malacards.org/card/adams_oliver_syndrome_6	Causative germline mutation	DLL4			0.650272	0.425928	0.119	0.355374	0.123552
9.63	Squamous Cell Carcinoma, Head and Neck	Cancer diseases, Rare diseases, Genetic diseases	278	14	ABCG1, BCL2, BTG1, CDC42EP3, DCBLD2, HAT1, ID4, ING1, ING3, IRS1, MGLL, MYLK, NMI, PLAU	http://www.malacards.org/card/squamous_cell_carcinoma_head_and_neck	Causative somatic mutation, Pathogenic, Causative mutation Ð Humsavar, Molecular basis known	ING1, ING3	Head Mesenchyme	ABCG1, BTG1, CDC42EP3, DCBLD2, HAT1, ID4, IRS1, MGLL, MYLK, NMI, PLAU	0.649821	0.274104	0.121173	0.320269	0.120718
2.83	3-Methylglutaconic Aciduria with Deafness, Encephalopathy, and Leigh-Like Syndrome	Ear diseases, Genetic diseases	1	1	SERAC1	http://www.malacards.org/card/3_methylglutaconic_aciduria_with_deafness_encephalopathy_and_leigh_like_syndrome	Pathogenic, Causative mutation Ð Humsavar, Genetic Tests, Molecular basis known	SERAC1			0.648429	0.336535	0.134225	0.42926	0.158217
2.83	Megdel Syndrome	Neuronal diseases, Ear diseases, Rare diseases, Fetal diseases, Metabolic diseases	1	1	SERAC1	http://www.malacards.org/card/megdel_syndrome	Causative germline mutation	SERAC1			0.648429	0.336535	0.134225	0.42926	0.158217
6.44	Autism Spectrum Disorder	Rare diseases, Fetal diseases, Genetic diseases	103	6	ADNP, CNTN4, GLO1, NLGN4X, SHANK2, ST7	http://www.malacards.org/card/autism_spectrum_disorder	Genetic Tests	NLGN4X, SHANK2			0.64815	0.273627	0.126715	0.306791	0.12142
3.7	Schizencephaly	Neuronal diseases, Rare diseases, Fetal diseases, Genetic diseases	11	2	SIX3, SOX2	http://www.malacards.org/card/schizencephaly	Causative mutation Ð Humsavar, Molecular basis known, Susceptibility factor	SIX3			0.647465	0.431536	0.0588546	0.356753	0.0825518
2.84	Optic Nerve Hypoplasia	Eye diseases, Neuronal diseases, Genetic diseases	8	2	SOX2, TUBGCP4	http://www.malacards.org/card/optic_nerve_hypoplasia					0.64697	0.43541	0.162648	0.305046	0.162389
3.21	Tauopathy	Neuronal diseases	38	3	CTNNB1, EIF2AK3, NPC1	http://www.malacards.org/card/tauopathy					0.646398	0.355519	0.0823869	0.4277	0.0436319
2.83	Microcephaly and Chorioretinopathy, Autosomal Recessive, 2	Eye diseases, Neuronal diseases, Immune diseases, Mental diseases, Rare diseases, Genetic diseases	1	1	PLK4	http://www.malacards.org/card/microcephaly_and_chorioretinopathy_autosomal_recessive_2	Pathogenic, Molecular basis known	PLK4			0.646091	0.308832	0.070424	0.429651	0.0201581
2.83	Coronary Artery Disease, Autosomal Dominant, 1	Cardiovascular diseases, Genetic diseases	1	1	MEF2A	http://www.malacards.org/card/coronary_artery_disease_autosomal_dominant_1	Pathogenic	MEF2A			0.645767	0.377774	0.106552	0.274451	0.100094
5.73	Pancreatic Ductal Adenocarcinoma	Endocrine diseases, Cancer diseases	423	10	BIRC3, BNIP3, COA1, CTNNB1, EPB41L4B, KLF5, PDCD4, PLAU, QSER1, THBS2	http://www.malacards.org/card/pancreatic_ductal_adenocarcinoma			Pancreas	BIRC3, BNIP3, COA1, EPB41L4B, KLF5, PDCD4, PLAU, QSER1, THBS2	0.645746	0.25959	0.159917	0.305896	0.10855
2.83	Kallmann Syndrome	Endocrine diseases, Reproductive diseases, Smell/Taste diseases, Rare diseases, Genetic diseases	47	2	FLRT3, PLAU	http://www.malacards.org/card/kallmann_syndrome	Causative germline mutation	FLRT3			0.645295	0.355558	0.0839762	0.382015	0.0530755
3.2	Mantle Cell Lymphoma	Immune diseases, Blood diseases, Cancer diseases, Rare diseases	36	3	BCL2, BMI1, CDKN1B	http://www.malacards.org/card/mantle_cell_lymphoma					0.644714	0.216925	0.134745	0.352014	0.116371
3.52	Asthma	Respiratory diseases, Rare diseases, Genetic diseases	158	4	CAT, KCNA1, MYLK, NR3C1	http://www.malacards.org/card/asthma			Lung	KCNA1	0.644415	0.352334	0.104911	0.270815	0.163198
2.55	Clear Cell Papillary Renal Cell Carcinoma	Nephrological diseases, Cancer diseases, Rare diseases	7	1	MITF	http://www.malacards.org/card/clear_cell_papillary_renal_cell_carcinoma	Susceptibility factor	MITF			0.644358	0.37115	0.121784	0.382104	0.163023
2.83	Loeys-Dietz Syndrome 4	Bone diseases, Rare diseases, Genetic diseases	1	1	TGFB2	http://www.malacards.org/card/loeys_dietz_syndrome_4	Causative mutation Ð Humsavar, Molecular basis known	TGFB2			0.644081	0.331058	0.342007	0.341363	0.124952
2.83	Tgfb2-Related Loeys-Dietz Syndrome	Genetic diseases	1	1	TGFB2	http://www.malacards.org/card/tgfb2_related_loeys_dietz_syndrome	Pathogenic, Genetic Tests	TGFB2			0.644081	0.331058	0.342007	0.341363	0.124952
2.33	Gadl1-Related Altered Drug Metabolism	Genetic diseases, Metabolic diseases	1	1	GADL1	http://www.malacards.org/card/gadl1_related_altered_drug_metabolism	Genetic Tests	GADL1			0.643836	0.368918	0.117178	0.44811	0.0526658
10.96	Dengue Hemorrhagic Fever	Infectious diseases	416	22	ALDH1L2, CCNE2, CENPU, DENND5B, DSC2, FOXO3, FRMD4A, GAS6, HMGB3, IGF2BP2, KIF14, MAP7, MLH3, MXI1, PLK4, RAB30, RAD51AP1, RTN1, SLC11A1, SULF2, TTK, UBE2J1	http://www.malacards.org/card/dengue_hemorrhagic_fever			Blood	ALDH1L2, CCNE2, CENPU, DENND5B, DSC2, FOXO3, FRMD4A, GAS6, HMGB3, IGF2BP2, KIF14, MAP7, MLH3, MXI1, PLK4, RAB30, RAD51AP1, RTN1, SLC11A1, SULF2, TTK, UBE2J1	0.643639	0.259094	0.133729	0.291539	0.16404
3.02	Walker-Warburg Syndrome	Eye diseases, Neuronal diseases, Muscle diseases, Rare diseases, Fetal diseases, Genetic diseases, Metabolic diseases	31	2	POMT2, ZC4H2	http://www.malacards.org/card/walker_warburg_syndrome	Causative germline mutation	POMT2			0.642894	0.37995	0.15108	0.254907	0.165224
2.46	Peroxisomal Biogenesis Disorders	Rare diseases, Genetic diseases	17	2	CAT, PEX1	http://www.malacards.org/card/peroxisomal_biogenesis_disorders					0.64288	0.331726	0.234008	0.244937	0.260688
2.3	Nasopharynx Carcinoma	Respiratory diseases, Cancer diseases	25	2	BMI1, BRD7	http://www.malacards.org/card/nasopharynx_carcinoma					0.642652	0.270878	0.123389	0.41676	0.157771
2.3	Pharynx Cancer	Oral diseases, Cancer diseases	25	2	BMI1, BRD7	http://www.malacards.org/card/pharynx_cancer					0.642652	0.270878	0.123389	0.41676	0.157771
2.55	Growth Hormone Deficiency, Isolated, Type Ia	Endocrine diseases, Rare diseases, Genetic diseases	6	1	BRCA2	http://www.malacards.org/card/growth_hormone_deficiency_isolated_type_ia	Pathogenic	BRCA2			0.642536	0.424074	0.0918826	0.418933	0.207539
2.48	Camurati-Engelmann Disease	Bone diseases, Rare diseases, Fetal diseases, Genetic diseases	11	1	IFT122	http://www.malacards.org/card/camurati_engelmann_disease	Molecular basis known	IFT122			0.642102	0.412872	0.159241	0.344809	0.147041
5.05	Ovarian Cancer	Reproductive diseases, Cancer diseases, Rare diseases	45	4	BRCA2, CTNNB1, MLH1, PLAU	http://www.malacards.org/card/ovarian_cancer	Pathogenic	BRCA2			0.642023	0.294849	0.124033	0.371571	0.0791132
2.83	Muscular Dystrophy-Dystroglycanopathy , Type B, 2	Eye diseases, Neuronal diseases, Mental diseases, Muscle diseases, Rare diseases, Fetal diseases, Genetic diseases, Metabolic diseases	1	1	POMT2	http://www.malacards.org/card/muscular_dystrophy_dystroglycanopathy_congenital_with_mental_retardation_type_b_2	Pathogenic, Causative mutation Ð Humsavar, Molecular basis known	POMT2			0.641919	0.338933	0.15727	0.28437	0.151493
2.83	Muscular Dystrophy-Dystroglycanopathy , Type a, 2	Eye diseases, Neuronal diseases, Mental diseases, Muscle diseases, Rare diseases, Fetal diseases, Genetic diseases, Metabolic diseases	1	1	POMT2	http://www.malacards.org/card/muscular_dystrophy_dystroglycanopathy_congenital_with_brain_and_eye_anomalies_type_a_2	Causative mutation Ð Humsavar, Molecular basis known	POMT2			0.641919	0.338933	0.15727	0.28437	0.151493
2.83	Muscular Dystrophy-Dystroglycanopathy , Type C, 2	Eye diseases, Neuronal diseases, Mental diseases, Muscle diseases, Rare diseases, Fetal diseases, Genetic diseases, Metabolic diseases	1	1	POMT2	http://www.malacards.org/card/muscular_dystrophy_dystroglycanopathy_type_c_2	Causative mutation Ð Humsavar, Molecular basis known, Causative germline mutation	POMT2			0.641919	0.338933	0.15727	0.28437	0.151493
2.52	Tietz Albinism-Deafness Syndrome	Skin diseases, Eye diseases, Neuronal diseases, Bone diseases, Ear diseases, Rare diseases, Fetal diseases, Genetic diseases	11	1	MITF	http://www.malacards.org/card/tietz_albinism_deafness_syndrome	Pathogenic, Causative mutation Ð Humsavar, Genetic Tests, Molecular basis known, Causative germline mutation	MITF			0.64157	0.369544	0.121257	0.380451	0.162317
4.81	Lynch Syndrome	Gastrointestinal diseases, Cancer diseases, Rare diseases, Genetic diseases	46	3	BRCA2, MLH1, MLH3	http://www.malacards.org/card/lynch_syndrome	modifying Germline mutation, Pathogenic, Causative germline mutation	MLH1, MLH3			0.64125	0.240041	0.257782	0.316564	0.190109
6.29	Fanconi Anemia, Complementation Group a	Skin diseases, Bone diseases, Nephrological diseases, Blood diseases, Cancer diseases, Rare diseases, Fetal diseases, Genetic diseases	75	5	ATAD5, BRCA2, DDX11, FANCB, MLH1	http://www.malacards.org/card/fanconi_anemia_complementation_group_a	Causative germline mutation	BRCA2, FANCB			0.640778	0.353966	0.101668	0.292707	0.146405
2.83	Glycogen Storage Disease Due to Glycogen Debranching Enzyme Deficiency	Neuronal diseases, Rare diseases, Metabolic diseases	1	1	AGL	http://www.malacards.org/card/glycogen_storage_disease_due_to_glycogen_debranching_enzyme_deficiency	Causative germline mutation	AGL			0.640406	0.257443	0.0292665	0.389367	0.0121037
2.33	Ngly1-Cdg	Genetic diseases	1	1	NGLY1	http://www.malacards.org/card/ngly1_cdg	Genetic Tests	NGLY1			0.64027	0.371997	0.0209368	0.468037	0.128054
5.42	Retinitis Pigmentosa	Eye diseases, Rare diseases, Genetic diseases	228	5	CYP4V2, LCA5, RPGR, TTLL5, WDR19	http://www.malacards.org/card/retinitis_pigmentosa	Pathogenic, Causative germline mutation	RPGR, TTLL5			0.640191	0.348136	0.140279	0.331107	0.0746463
6.72	Pancreatic Cancer	Endocrine diseases, Gastrointestinal diseases, Cancer diseases, Rare diseases, Genetic diseases	153	7	BCL2, BRCA2, CDKN1B, CTNNB1, KLF10, PLAU, TGFB2	http://www.malacards.org/card/pancreatic_cancer	Susceptibility factor	BRCA2			0.640142	0.275115	0.127641	0.329125	0.100319
2.51	Limbic Encephalitis	Rare diseases	16	2	AMPH, GRIA1	http://www.malacards.org/card/limbic_encephalitis					0.639171	0.305524	0.0544286	0.317668	0.0452214
7.72	Diabetes Mellitus, Noninsulin-Dependent	Endocrine diseases, Genetic diseases, Metabolic diseases	226	7	CAPN10, CAT, IGF2BP2, IRS1, LPIN1, NR3C1, RAD52	http://www.malacards.org/card/diabetes_mellitus_noninsulin_dependent	Risk factor, Pathogenic, Causative mutation Ð Humsavar	CAPN10, IGF2BP2, IRS1	Pancreas	RAD52	0.638986	0.278872	0.132681	0.200003	0.146355
7.52	Hepatocellular Carcinoma	Neuronal diseases, Gastrointestinal diseases, Liver diseases, Cancer diseases, Rare diseases, Genetic diseases	215	8	BCL2, CDKN1B, CTNNB1, DDIT4, IGF2BP2, SFXN1, STARD13, ZC4H2	http://www.malacards.org/card/hepatocellular_carcinoma	Molecular basis known	CTNNB1	Liver	DDIT4, SFXN1	0.638941	0.297539	0.124175	0.317074	0.0984768
2.62	Plexopathy	Neuronal diseases	13	2	AMPH, PIK3C2A	http://www.malacards.org/card/plexopathy					0.637335	0.224342	0.0224055	0.293493	0.107391
5.01	Amyotrophic Lateral Sclerosis 1	Neuronal diseases, Mental diseases, Rare diseases, Genetic diseases	290	7	AHR, ALS2, CDC42EP3, GRIA1, GRIA4, SUGCT, TGFB2	http://www.malacards.org/card/amyotrophic_lateral_sclerosis_1			Skeletal Muscle	AHR, CDC42EP3, TGFB2	0.636811	0.285655	0.178162	0.350883	0.0910277
4.72	Amyotrophic Lateral Sclerosis 2, Juvenile	Neuronal diseases, Mental diseases, Rare diseases, Genetic diseases	18	3	ALS2, CARF, FAM117B	http://www.malacards.org/card/amyotrophic_lateral_sclerosis_2_juvenile	Pathogenic, Molecular basis known	ALS2			0.636682	0.284384	0.159064	0.302848	0.0890718
2.13	Bipolar Disorder	Mental diseases, Rare diseases, Genetic diseases	39	2	GNAL, NR3C1	http://www.malacards.org/card/bipolar_disorder					0.635376	0.343739	0.0798668	0.334208	0.075578
2.83	Moyamoya Disease with Early-Onset Achalasia	Neuronal diseases, Gastrointestinal diseases, Rare diseases, Genetic diseases	1	1	GUCY1A3	http://www.malacards.org/card/moyamoya_disease_with_early_onset_achalasia	Causative germline mutation	GUCY1A3			0.635325	0.350699	0.181067	0.271284	0.16709
2.83	Moyamoya 6 with Achalasia	Neuronal diseases, Gastrointestinal diseases, Rare diseases, Genetic diseases	1	1	GUCY1A3	http://www.malacards.org/card/moyamoya_6_with_achalasia	Pathogenic, Molecular basis known	GUCY1A3			0.635325	0.350699	0.181067	0.271284	0.16709
2.76	Glucocorticoid Resistance	Endocrine diseases, Reproductive diseases, Rare diseases, Fetal diseases, Genetic diseases	7	1	NR3C1	http://www.malacards.org/card/glucocorticoid_resistance	Pathogenic, Causative mutation Ð Humsavar, Genetic Tests, Molecular basis known, Causative germline mutation	NR3C1			0.63386	0.418348	0.0585687	0.238331	0.0881066
2.83	Polyendocrine-Polyneuropathy Syndrome	Endocrine diseases, Neuronal diseases, Reproductive diseases, Rare diseases, Genetic diseases	2	1	DMXL2	http://www.malacards.org/card/polyendocrine_polyneuropathy_syndrome	Pathogenic	DMXL2			0.63349	0.343351	0.158372	0.322446	0.0426339
5.44	Endometrial Cancer	Reproductive diseases, Cancer diseases, Rare diseases, Genetic diseases	88	5	BCL2, BRCA2, CTNNB1, MLH1, MLH3	http://www.malacards.org/card/endometrial_cancer	Pathogenic	MLH3			0.633327	0.229442	0.181862	0.355043	0.125893
2.66	Peroxisome Biogenesis Disorders, Zellweger Syndrome Spectrum		12	2	PEX1, PEX26	http://www.malacards.org/card/peroxisome_biogenesis_disorders_zellweger_syndrome_spectrum					0.63273	0.308456	0.149957	0.381853	0.166408
3.23	Fragile X Syndrome	Endocrine diseases, Eye diseases, Neuronal diseases, Mental diseases, Rare diseases, Fetal diseases, Genetic diseases	33	3	CYFIP1, GRIA1, GRM1	http://www.malacards.org/card/fragile_x_syndrome					0.632645	0.222269	0.0944539	0.342472	0.0304302
3.77	Peroxisome Disorders	Rare diseases	16	3	CAT, PEX1, SLC25A17	http://www.malacards.org/card/peroxisome_disorders					0.631259	0.306792	0.197584	0.211051	0.226622
2.83	Hypocalcemia, Autosomal Dominant 2	Endocrine diseases, Rare diseases, Genetic diseases	1	1	GNA11	http://www.malacards.org/card/hypocalcemia_autosomal_dominant_2	Pathogenic, Causative mutation Ð Humsavar, Genetic Tests, Molecular basis known	GNA11			0.63091	0.335644	0.0794946	0.218926	0.142586
2.83	Hypocalciuric Hypercalcemia, Type Ii	Endocrine diseases, Bone diseases, Respiratory diseases, Rare diseases, Fetal diseases, Genetic diseases	1	1	GNA11	http://www.malacards.org/card/hypocalciuric_hypercalcemia_type_ii	Pathogenic, Causative mutation Ð Humsavar, Genetic Tests, Molecular basis known, Causative germline mutation	GNA11			0.63091	0.335644	0.0794946	0.218926	0.142586
2.24	Oral Cavity Cancer	Oral diseases, Cancer diseases	29	2	CAT, SOX2	http://www.malacards.org/card/oral_cavity_cancer					0.629305	0.423522	0.122337	0.280041	0.156382
2.43	Malignant Granular Cell Myoblastoma	Cancer diseases	19	2	BRD7, PIK3C2A	http://www.malacards.org/card/malignant_granular_cell_myoblastoma					0.628596	0.288526	0.0562593	0.381558	0.126662
2.65	Congenital Muscular Dystrophy with Intellectual Disability	Neuronal diseases, Muscle diseases, Rare diseases, Metabolic diseases	5	1	POMT2	http://www.malacards.org/card/congenital_muscular_dystrophy_with_intellectual_disability	Causative germline mutation	POMT2			0.62796	0.331563	0.15385	0.278186	0.148199
2.43	Tetraploidy	Rare diseases, Fetal diseases	19	2	BRCA2, CAT	http://www.malacards.org/card/tetraploidy					0.626557	0.396297	0.162278	0.286963	0.235585
2.83	Glutaric Acidemia Type Iii	Neuronal diseases, Rare diseases, Genetic diseases, Metabolic diseases	1	1	SUGCT	http://www.malacards.org/card/glutaric_acidemia_type_iii	Causative germline mutation	SUGCT			0.625573	0.297147	0.218951	0.451664	0.173284
2.83	Glutaric Aciduria Iii	Genetic diseases	1	1	SUGCT	http://www.malacards.org/card/glutaric_aciduria_iii	Pathogenic, Causative mutation Ð Humsavar, Genetic Tests, Molecular basis known	SUGCT			0.625573	0.297147	0.218951	0.451664	0.173284
3.28	Myopathy, Centronuclear	Neuronal diseases, Muscle diseases, Rare diseases, Genetic diseases	24	2	AMPH, BIN1	http://www.malacards.org/card/myopathy_centronuclear	Causative germline mutation	BIN1			0.625546	0.229888	0.0379425	0.180157	0.201113
2.66	Esophageal Atresia	Gastrointestinal diseases, Rare diseases, Fetal diseases	12	2	FANCB, SOX2	http://www.malacards.org/card/esophageal_atresia					0.625543	0.438505	0.0182346	0.277741	0.108532
2.83	Endocrine-Cerebroosteodysplasia	Bone diseases, Rare diseases, Fetal diseases, Genetic diseases	1	1	ICK	http://www.malacards.org/card/endocrine_cerebroosteodysplasia	Pathogenic, Causative mutation Ð Humsavar, Molecular basis known, Causative germline mutation	ICK			0.624778	0.185559	0.217423	0.243038	0.0918423
11.56	Lung Cancer	Respiratory diseases, Cancer diseases, Genetic diseases	621	19	BCL2, BIRC3, CDKN1B, CENPU, CTNNB1, FLRT3, FLT1, FOXO3, HMGB3, ID4, KIF14, LGR4, LMO3, MLH1, PLAU, RALBP1, SOX2, THBS2, TTK	http://www.malacards.org/card/lung_cancer			Lung	CENPU, FLRT3, HMGB3, ID4, KIF14, LGR4, LMO3, SOX2, THBS2, TTK	0.624569	0.243687	0.132265	0.328066	0.130321
2.36	Aniridia	Eye diseases, Rare diseases, Genetic diseases	21	2	CAT, LGR4	http://www.malacards.org/card/aniridia					0.62386	0.354041	0.235195	0.212424	0.272939
2.7	Chromosome 18p Deletion Syndrome	Eye diseases, Rare diseases, Fetal diseases, Genetic diseases	11	2	GNAL, SIX3	http://www.malacards.org/card/chromosome_18p_deletion_syndrome					0.623355	0.316041	0.101919	0.359053	0.0891086
2.33	Primary Familial Brain Calcification 3	Neuronal diseases, Rare diseases, Genetic diseases	1	1	SLC20A2	http://www.malacards.org/card/primary_familial_brain_calcification_3	Genetic Tests	SLC20A2			0.623243	0.303519	0.0947329	0.519161	0.0328449
2.33	Primary Familial Brain Calcification 1	Neuronal diseases, Rare diseases, Genetic diseases	1	1	SLC20A2	http://www.malacards.org/card/primary_familial_brain_calcification_1	Genetic Tests	SLC20A2			0.623243	0.303519	0.0947329	0.519161	0.0328449
2.43	Tumor of Exocrine Pancreas	Endocrine diseases, Cancer diseases	19	2	AGFG1, CDKN1B	http://www.malacards.org/card/tumor_of_exocrine_pancreas					0.622819	0.328849	0.103388	0.332897	0.111485
2.83	Cerebral Cavernous Malformation, Familial	Eye diseases, Neuronal diseases, Cardiovascular diseases, Rare diseases, Fetal diseases, Genetic diseases	3	1	KRIT1	http://www.malacards.org/card/cerebral_cavernous_malformation_familial	Causative germline mutation	KRIT1			0.622782	0.328829	0.10961	0.262814	0.159432
4.24	Hypocalcemia, Autosomal Dominant	Endocrine diseases, Rare diseases, Genetic diseases	6	2	GNA11, GRM1	http://www.malacards.org/card/hypocalcemia_autosomal_dominant	Causative germline mutation	GNA11			0.621306	0.233611	0.0574397	0.226155	0.10469
2.51	Sensory Peripheral Neuropathy	Neuronal diseases	16	2	FGD4, GDAP1	http://www.malacards.org/card/sensory_peripheral_neuropathy					0.621291	0.305675	0.150352	0.323382	0.12985
3.04	Acute Myocardial Infarction	Cardiovascular diseases, Genetic diseases	77	3	C2CD3, PIK3C2A, SLC11A1	http://www.malacards.org/card/acute_myocardial_infarction			Blood	C2CD3, SLC11A1	0.620891	0.330935	0.0879182	0.363842	0.0723131
2.33	Pancreatic Cancer Susceptibility 2	Endocrine diseases, Cancer diseases, Genetic diseases	1	1	BRCA2	http://www.malacards.org/card/pancreatic_cancer_susceptibility_2	Genetic Tests	BRCA2			0.62074	0.409689	0.0887659	0.404723	0.200499
2.33	Brca1 and Brca2 Hereditary Breast and Ovarian Cancer	Cancer diseases, Genetic diseases	5	1	BRCA2	http://www.malacards.org/card/brca1_and_brca2_hereditary_breast_and_ovarian_cancer	Genetic Tests	BRCA2			0.62074	0.409689	0.0887659	0.404723	0.200499
2.33	Brca2-Related Fanconi Anemia	Genetic diseases	1	1	BRCA2	http://www.malacards.org/card/brca2_related_fanconi_anemia	Genetic Tests	BRCA2			0.62074	0.409689	0.0887659	0.404723	0.200499
4.36	Senior-Loken Syndrome-1	Eye diseases, Nephrological diseases, Rare diseases, Genetic diseases	20	3	AHI1, RPGR, WDR19	http://www.malacards.org/card/senior_loken_syndrome_1_2	Causative germline mutation	WDR19			0.620293	0.31821	0.103713	0.290918	0.119096
2.62	Breast Secretory Carcinoma	Cancer diseases, Rare diseases	13	2	BRCA2, CISH	http://www.malacards.org/card/breast_secretory_carcinoma					0.620084	0.338566	0.0628145	0.392513	0.139829
2.33	Lca5-Related Leber Congenital Amaurosis	Eye diseases, Neuronal diseases, Rare diseases, Genetic diseases	1	1	LCA5	http://www.malacards.org/card/lca5_related_leber_congenital_amaurosis	Genetic Tests	LCA5			0.62002	0.438974	0.0967231	0.367052	0.0449514
2.55	Congenital Muscular Dystrophy with Cerebellar Involvement	Neuronal diseases, Muscle diseases, Rare diseases, Metabolic diseases	6	1	POMT2	http://www.malacards.org/card/congenital_muscular_dystrophy_with_cerebellar_involvement	Causative germline mutation	POMT2			0.619419	0.327053	0.151758	0.274402	0.146183
4.28	Ulcerative Colitis	Bone diseases, Immune diseases, Gastrointestinal diseases	116	5	CTNNB1, ENTPD5, MXI1, PDK3, PTPRR	http://www.malacards.org/card/ulcerative_colitis			Colon	ENTPD5, MXI1, PDK3, PTPRR	0.619382	0.297427	0.129001	0.2646	0.170454
2.83	Intellectual Disability-Developmental Delay-Contractures Syndrome	Neuronal diseases, Muscle diseases, Rare diseases, Fetal diseases	2	1	ZC4H2	http://www.malacards.org/card/intellectual_disability_developmental_delay_contractures_syndrome	Causative germline mutation	ZC4H2			0.618418	0.404445	0.139144	0.216446	0.17192
2.83	Wieacker-Wolff Syndrome	Genetic diseases	2	1	ZC4H2	http://www.malacards.org/card/wieacker_wolff_syndrome	Pathogenic, Causative mutation Ð Humsavar, Genetic Tests, Molecular basis known	ZC4H2			0.618418	0.404445	0.139144	0.216446	0.17192
2.43	in Situ Carcinoma	Eye diseases, Oral diseases, Cancer diseases, Genetic diseases	19	2	BRCA2, NR3C1	http://www.malacards.org/card/in_situ_carcinoma					0.618353	0.408113	0.0727801	0.317833	0.14284
2.51	Skull Base Meningioma	Cancer diseases	16	2	GNA11, SLC25A16	http://www.malacards.org/card/skull_base_meningioma					0.617879	0.347557	0.133153	0.344776	0.0722949
2.76	Cerebral Cavernous Malformations-1	Eye diseases, Neuronal diseases, Cardiovascular diseases, Rare diseases, Fetal diseases, Genetic diseases	7	1	KRIT1	http://www.malacards.org/card/cerebral_cavernous_malformations_1	Causative mutation Ð Humsavar, Molecular basis known	KRIT1			0.617715	0.326153	0.108718	0.260676	0.158135
2.53	Progressive Muscular Dystrophy	Neuronal diseases, Cardiovascular diseases, Muscle diseases, Rare diseases, Genetic diseases	10	1	POMT2	http://www.malacards.org/card/progressive_muscular_dystrophy	Pathogenic	POMT2			0.617638	0.326113	0.151321	0.273614	0.145763
2.83	Autosomal Dominant Charcot-Marie-Tooth Disease Type 2k	Neuronal diseases, Ear diseases, Muscle diseases, Rare diseases, Fetal diseases, Genetic diseases, Metabolic diseases	1	1	GDAP1	http://www.malacards.org/card/autosomal_dominant_charcot_marie_tooth_disease_type_2k	Causative germline mutation	GDAP1			0.617446	0.303166	0.215489	0.280938	0.187704
2.83	Autosomal Recessive Intermediate Charcot-Marie-Tooth Disease Type a	Neuronal diseases, Ear diseases, Muscle diseases, Rare diseases, Fetal diseases, Genetic diseases, Metabolic diseases	1	1	GDAP1	http://www.malacards.org/card/autosomal_recessive_intermediate_charcot_marie_tooth_disease_type_a	Causative germline mutation	GDAP1			0.617446	0.303166	0.215489	0.280938	0.187704
2.83	Charcot-Marie-Tooth Disease Type 2k	Neuronal diseases, Ear diseases, Muscle diseases, Rare diseases, Fetal diseases, Genetic diseases, Metabolic diseases	1	1	GDAP1	http://www.malacards.org/card/charcot_marie_tooth_disease_type_2k	Pathogenic	GDAP1			0.617446	0.303166	0.215489	0.280938	0.187704
2.83	Charcot-Marie-Tooth Disease Type 2g	Neuronal diseases, Ear diseases, Muscle diseases, Rare diseases, Fetal diseases, Genetic diseases, Metabolic diseases	1	1	GDAP1	http://www.malacards.org/card/charcot_marie_tooth_disease_type_2g	Pathogenic	GDAP1			0.617446	0.303166	0.215489	0.280938	0.187704
2.83	Autosomal Recessive Charcot-Marie-Tooth Disease with Hoarseness	Neuronal diseases, Rare diseases	1	1	GDAP1	http://www.malacards.org/card/autosomal_recessive_charcot_marie_tooth_disease_with_hoarseness	Causative germline mutation	GDAP1			0.617446	0.303166	0.215489	0.280938	0.187704
2.45	Fibrosarcoma of Bone	Bone diseases, Cancer diseases	18	2	ING1, STARD13	http://www.malacards.org/card/fibrosarcoma_of_bone					0.617242	0.335163	0.0464166	0.38269	0.0585763
3.23	Malaria	Rare diseases, Genetic diseases, Infectious diseases	199	4	CISH, HVCN1, IL12B, TGFB2	http://www.malacards.org/card/malaria			Blood	HVCN1	0.616931	0.27839	0.208152	0.27839	0.130172
2.83	Yunis-Varon Syndrome	Bone diseases, Rare diseases, Fetal diseases, Genetic diseases	2	1	MCM3AP	http://www.malacards.org/card/yunis_varon_syndrome_2	Molecular basis known	MCM3AP			0.616855	0.352841	0.0122137	0.420078	0.0123371
2.83	Charcot-Marie-Tooth Disease, Type 4j	Neuronal diseases, Ear diseases, Muscle diseases, Rare diseases, Fetal diseases, Genetic diseases, Metabolic diseases	2	1	MCM3AP	http://www.malacards.org/card/charcot_marie_tooth_disease_type_4j	Molecular basis known	MCM3AP			0.616855	0.352841	0.0122137	0.420078	0.0123371
2.4	Atrophic Glossitis	Oral diseases, Gastrointestinal diseases	20	2	AKTIP, PIK3C2A	http://www.malacards.org/card/atrophic_glossitis					0.616677	0.312347	0.190245	0.30248	0.182537
2.46	Tooth Disease	Oral diseases, Gastrointestinal diseases	28	2	FGD4, GDAP1	http://www.malacards.org/card/tooth_disease					0.616626	0.30338	0.149223	0.320954	0.128875
2.21	Respiratory Failure	Respiratory diseases, Rare diseases, Fetal diseases, Infectious diseases	31	2	CAT, PIK3C2A	http://www.malacards.org/card/respiratory_failure					0.616584	0.322782	0.136882	0.247867	0.196382
3	Endemic Typhus	Rare diseases, Infectious diseases	5	2	BIN1, ICK	http://www.malacards.org/card/endemic_typhus					0.616347	0.237294	0.144225	0.179973	0.203703
2.33	Myokymia 1 with or Without Hypomagnesemia	Genetic diseases	1	1	KCNA1	http://www.malacards.org/card/myokymia_1_with_or_without_hypomagnesemia	Genetic Tests	KCNA1			0.616204	0.379581	0.0930467	0.237855	0.130635
2.31	Vitiligo-Associated Multiple Autoimmune Disease Susceptibility 1	Skin diseases, Immune diseases, Rare diseases, Genetic diseases	23	2	CAT, MITF	http://www.malacards.org/card/vitiligo_associated_multiple_autoimmune_disease_susceptibility_1					0.615052	0.363188	0.173445	0.26355	0.209733
2.51	Tongue Cancer	Oral diseases, Cancer diseases, Rare diseases	16	2	BMI1, CTNNB1	http://www.malacards.org/card/tongue_cancer					0.61503	0.311513	0.0844947	0.394849	0.106708
2.33	Spinocerebellar Ataxia Type17	Genetic diseases	1	1	TBP	http://www.malacards.org/card/spinocerebellar_ataxia_type17	Genetic Tests	TBP			0.614814	0.207807	0.201044	0.389792	0.113126
2.83	Non-Progressive Predominantly Posterior Cavitating Leukoencephalopathy with Peripheral Neuropathy	Neuronal diseases, Rare diseases, Metabolic diseases	1	1	APOPT1	http://www.malacards.org/card/non_progressive_predominantly_posterior_cavitating_leukoencephalopathy_with_peripheral_neuropathy	Causative germline mutation	APOPT1			0.613651	0.380464	0.0271234	0.322167	0.0269393
3.55	Melioidosis	Immune diseases, Rare diseases, Genetic diseases, Infectious diseases	408	8	AMPH, DACH1, EPHA4, ERI1, KLF5, PTPDC1, SULF2, TBC1D4	http://www.malacards.org/card/melioidosis			Blood	AMPH, DACH1, EPHA4, ERI1, KLF5, PTPDC1, SULF2, TBC1D4	0.613178	0.259068	0.110043	0.247954	0.153724
2.83	Wagner Syndrome 1	Eye diseases, Rare diseases, Genetic diseases	2	1	ERV3-1	http://www.malacards.org/card/wagner_syndrome_1	Molecular basis known	ERV3-1			0.613127	0.3176	0.260579	0.269163	0.26855
2.83	Beckwith-Wiedemann Syndrome Due to Nsd1 Mutation	Nephrological diseases, Cancer diseases, Rare diseases, Fetal diseases, Genetic diseases	1	1	NSD1	http://www.malacards.org/card/beckwith_wiedemann_syndrome_due_to_nsd1_mutation	Causative germline mutation	NSD1			0.6124	0.428068	0.0685888	0.255371	0.0838988
3.38	Follicular Lymphoma	Immune diseases, Blood diseases, Cancer diseases, Rare diseases	288	6	BCL2, LMO3, NIN, PLEKHF2, PPM1K, SHANK2	http://www.malacards.org/card/follicular_lymphoma	Gene fusion	BCL2	Intestine	BCL2, LMO3, NIN, PLEKHF2, PPM1K, SHANK2	0.61224	0.225549	0.0728749	0.338671	0.104826
2.92	Pigmented Basal Cell Carcinoma	Skin diseases, Cancer diseases	8	2	BCL2, MITF	http://www.malacards.org/card/pigmented_basal_cell_carcinoma					0.611875	0.189192	0.127882	0.383646	0.0937699
2.48	Glycogen Storage Disease Iiia	Endocrine diseases, Cardiovascular diseases, Liver diseases, Rare diseases, Genetic diseases, Metabolic diseases	12	1	AGL	http://www.malacards.org/card/glycogen_storage_disease_iiia	Causative mutation Ð Humsavar, Genetic Tests, Molecular basis known	AGL			0.611632	0.245876	0.0279516	0.371872	0.0115598
3.43	Gastric Adenocarcinoma	Gastrointestinal diseases, Cancer diseases	26	3	AMIGO2, BCL2, CTNNB1	http://www.malacards.org/card/gastric_adenocarcinoma					0.611576	0.282833	0.109221	0.36613	0.0732872
2.46	Polycystic Kidney and Hepatic Disease	Reproductive diseases, Nephrological diseases, Rare diseases, Genetic diseases	17	2	PIK3C2A, PKD2	http://www.malacards.org/card/polycystic_kidney_and_hepatic_disease					0.611262	0.259786	0.0221216	0.355143	0.0673305
2.83	Adams-Oliver Syndrome 6	Skin diseases, Bone diseases, Rare diseases, Fetal diseases, Genetic diseases	1	1	DLL4	http://www.malacards.org/card/adams_oliver_syndrome_6_2	Pathogenic, Genetic Tests, Molecular basis known	DLL4			0.610944	0.400779	0.0861431	0.453931	0.0623163
5.75	Cervical Squamous Cell Carcinoma	Reproductive diseases, Cancer diseases, Rare diseases	354	11	ATP2C1, CCNE2, CTNNB1, DSC2, ID4, IGF2BP2, KIF14, MGLL, PLK4, RAD51AP1, TTK	http://www.malacards.org/card/cervical_squamous_cell_carcinoma			Uterus	ATP2C1, CCNE2, DSC2, ID4, IGF2BP2, KIF14, MGLL, PLK4, RAD51AP1, TTK	0.610744	0.26051	0.124707	0.323972	0.143347
2.83	Orofaciodigital Syndrome Xiv	Eye diseases, Neuronal diseases, Bone diseases, Ear diseases, Oral diseases, Respiratory diseases, Nephrological diseases, Rare diseases, Fetal diseases, Genetic diseases	1	1	C2CD3	http://www.malacards.org/card/orofaciodigital_syndrome_xiv	Pathogenic, Causative mutation Ð Humsavar, Causative germline mutation	C2CD3			0.610715	0.385361	0.167336	0.370093	0.0586286
2.2	Coronary Artery Disease	Cardiovascular diseases, Genetic diseases	42	2	MEF2A, PIK3C2A	http://www.malacards.org/card/coronary_artery_disease					0.610573	0.313529	0.0714371	0.294602	0.110819
2.83	Microcephaly and Chorioretinopathy, Autosomal Recessive, 1	Eye diseases, Neuronal diseases, Immune diseases, Mental diseases, Rare diseases, Genetic diseases	1	1	TUBGCP6	http://www.malacards.org/card/microcephaly_and_chorioretinopathy_autosomal_recessive_1	Pathogenic, Genetic Tests, Molecular basis known	TUBGCP6			0.61056	0.132492	0.211254	0.269257	0.205759
2.37	46,xx Testicular Disorder of Sex Development	Endocrine diseases, Reproductive diseases, Rare diseases, Fetal diseases, Genetic diseases	9	1	NUP107	http://www.malacards.org/card/46xx_testicular_disorder_of_sex_development	Causative germline mutation	NUP107			0.60968	0.20851	0.139007	0.492621	0.0118278
2.74	Esophageal Cancer	Gastrointestinal diseases, Cancer diseases, Rare diseases, Genetic diseases	95	3	BMI1, CDKN1B, CTNNB1	http://www.malacards.org/card/esophageal_cancer					0.609595	0.327759	0.0810286	0.332839	0.109524
6.22	Renal Cell Carcinoma, Papillary	Nephrological diseases, Cancer diseases, Rare diseases, Genetic diseases	336	11	BHLHE41, BIVM, DACH1, FGF9, KDELC1, KLHL29, MITF, NPC1, SULF2, TEN1, TTK	http://www.malacards.org/card/renal_cell_carcinoma_papillary	Susceptibility factor	MITF	Kidney	BHLHE41, BIVM, DACH1, FGF9, KDELC1, KLHL29, NPC1, SULF2, TEN1, TTK	0.608965	0.250063	0.146118	0.274034	0.146089
2.66	Vulvar Intraepithelial Neoplasia	Reproductive diseases, Cancer diseases, Rare diseases	12	2	CTNNB1, SOX2	http://www.malacards.org/card/vulvar_intraepithelial_neoplasia					0.608699	0.422133	0.00443315	0.391698	0.0362176
2.92	Leukemia, Acute Lymphoblastic	Immune diseases, Cancer diseases, Rare diseases, Genetic diseases	57	3	AFF1, BCL2, MLLT10	http://www.malacards.org/card/leukemia_acute_lymphoblastic					0.608071	0.195475	0.140464	0.370315	0.13489
2.72	Keratopathy	Eye diseases	11	2	MBD5, TGFB2	http://www.malacards.org/card/keratopathy					0.607525	0.230252	0.203217	0.302244	0.0589989
3.45	Amyotrophic Lateral Sclerosis Type 2	Neuronal diseases, Mental diseases, Rare diseases, Genetic diseases	17	2	ALS2, MCF2	http://www.malacards.org/card/amyotrophic_lateral_sclerosis_type_2	Causative germline mutation	ALS2			0.607489	0.210495	0.227201	0.242084	0.183158
2.83	Mitochondrial Neurogastrointestinal Encephalomyopathy	Eye diseases, Neuronal diseases, Gastrointestinal diseases, Rare diseases, Metabolic diseases	3	1	RRM2B	http://www.malacards.org/card/mitochondrial_neurogastrointestinal_encephalomyopathy	Causative germline mutation	RRM2B			0.607217	0.358258	0.30118	0.256246	0.228921
2.83	Progressive External Ophthalmoplegia with Mitochondrial Dna Deletions, Autosomal Dominant 5	Genetic diseases	1	1	RRM2B	http://www.malacards.org/card/progressive_external_ophthalmoplegia_with_mitochondrial_dna_deletions_autosomal_dominant_5	Pathogenic, Genetic Tests, Molecular basis known	RRM2B			0.607217	0.358258	0.30118	0.256246	0.228921
2.83	Adult-Onset Chronic Progressive External Ophthalmoplegia with Mitochondrial Myopathy	Neuronal diseases, Ear diseases, Rare diseases, Fetal diseases, Metabolic diseases	2	1	RRM2B	http://www.malacards.org/card/adult_onset_chronic_progressive_external_ophthalmoplegia_with_mitochondrial_myopathy	Causative germline mutation	RRM2B			0.607217	0.358258	0.30118	0.256246	0.228921
2.83	Mitochondrial Dna Depletion Syndrome 8a	Neuronal diseases, Nephrological diseases, Genetic diseases, Metabolic diseases	1	1	RRM2B	http://www.malacards.org/card/mitochondrial_dna_depletion_syndrome_8a_encephalomyopathic_type_with_renal_tubulopathy	Pathogenic, Causative mutation Ð Humsavar, Molecular basis known	RRM2B			0.607217	0.358258	0.30118	0.256246	0.228921
2.83	Mitochondrial Dna Depletion Syndrome, Encephalomyopathic Form with Renal Tubulopathy	Neuronal diseases, Nephrological diseases, Rare diseases, Metabolic diseases	1	1	RRM2B	http://www.malacards.org/card/mitochondrial_dna_depletion_syndrome_encephalomyopathic_form_with_renal_tubulopathy	Causative germline mutation	RRM2B			0.607217	0.358258	0.30118	0.256246	0.228921
2.83	Rrm2b-Related Mitochondrial Disease	Rare diseases, Genetic diseases, Metabolic diseases	1	1	RRM2B	http://www.malacards.org/card/rrm2b_related_mitochondrial_disease	Pathogenic	RRM2B			0.607217	0.358258	0.30118	0.256246	0.228921
2.52	Myeloid/lymphoid or Mixed Lineage Leukemia	Immune diseases, Cancer diseases, Genetic diseases	15	2	AFF1, MLLT10	http://www.malacards.org/card/myeloid_lymphoid_or_mixed_lineage_leukemia					0.606412	0.279556	0.140688	0.353538	0.185562
4.76	Pulmonary Tuberculosis	Respiratory diseases, Infectious diseases	420	10	AHI1, IVNS1ABP, KLF10, KLF5, MAP7, MEF2A, PTPDC1, SLC11A1, SLC25A17, TANK	http://www.malacards.org/card/pulmonary_tuberculosis			Blood	AHI1, IVNS1ABP, KLF10, KLF5, MAP7, MEF2A, PTPDC1, SLC25A17, TANK	0.606404	0.274459	0.109965	0.246685	0.141941
2.56	Tangier Disease	Endocrine diseases, Eye diseases, Neuronal diseases, Rare diseases, Genetic diseases, Metabolic diseases	13	2	ABCG1, NPC1	http://www.malacards.org/card/tangier_disease					0.606267	0.276155	0.106461	0.33466	0.0654769
8.03	Schizophrenia	Neuronal diseases, Mental diseases, Rare diseases, Genetic diseases	249	10	ADGRA3, ARNTL, GNAL, GRIA1, GRIA4, GRIK3, GRM1, LRRTM1, VRK2, WWC1	http://www.malacards.org/card/schizophrenia					0.605513	0.237482	0.110906	0.267219	0.0907058
2.4	Uveitis	Eye diseases, Rare diseases	20	2	NR3C1, TGFB2	http://www.malacards.org/card/uveitis					0.605114	0.355202	0.188614	0.274117	0.100752
2.54	Proliferative Fasciitis		15	2	CALM1, PIK3C2A	http://www.malacards.org/card/proliferative_fasciitis					0.60495	0.269808	0.0828781	0.291283	0.14549
1.5	Diversion Colitis	Gastrointestinal diseases	5	1	EIF2AK3	http://www.malacards.org/card/diversion_colitis					0.604764	0.442082	0.0287868	0.411844	0.0154215
2.32	Dejerine-Sottas Disease	Neuronal diseases, Rare diseases, Genetic diseases	17	2	FGD4, GDAP1	http://www.malacards.org/card/dejerine_sottas_disease					0.602669	0.296513	0.145846	0.313689	0.125958
2.33	Mef2a-Related Coronary Artery Disease Susceptibility	Genetic diseases	1	1	MEF2A	http://www.malacards.org/card/mef2a_related_coronary_artery_disease_susceptibility	Genetic Tests	MEF2A			0.601994	0.352167	0.099329	0.255847	0.0933091
4.43	Rheumatoid Arthritis	Bone diseases, Rare diseases, Genetic diseases	501	8	C1orf21, CAT, DDIT4, FLT1, NAV2, RTN1, SLC11A1, WASF3	http://www.malacards.org/card/rheumatoid_arthritis			Cartilage	C1orf21, DDIT4, NAV2, RTN1, WASF3	0.601874	0.305494	0.0967383	0.309621	0.0878246
7.1	Renal Cell Carcinoma	Nephrological diseases, Cancer diseases, Rare diseases, Genetic diseases	423	12	BHLHE41, BIRC3, BRCA2, CCNE2, DIRC2, FGF9, FLT1, GRM1, KIF14, NONO, TEN1, TTK	http://www.malacards.org/card/renal_cell_carcinoma	Genetic linkage	DIRC2	Kidney	BHLHE41, BIRC3, BRCA2, CCNE2, FGF9, GRM1, KIF14, TEN1, TTK	0.601767	0.235592	0.14307	0.27732	0.155552
2.83	Spastic Paraplegia 15, Autosomal Recessive	Eye diseases, Neuronal diseases, Bone diseases, Mental diseases, Gastrointestinal diseases, Rare diseases, Genetic diseases, Metabolic diseases	1	1	ZFYVE26	http://www.malacards.org/card/spastic_paraplegia_15_autosomal_recessive	Pathogenic, Molecular basis known	ZFYVE26			0.601444	0.187049	0.0613472	0.398156	0.0552125
2.83	Spastic Paraplegia 15	Eye diseases, Neuronal diseases, Bone diseases, Mental diseases, Gastrointestinal diseases, Rare diseases, Genetic diseases, Metabolic diseases	1	1	ZFYVE26	http://www.malacards.org/card/spastic_paraplegia_15	Genetic Tests, Causative germline mutation	ZFYVE26			0.601444	0.187049	0.0613472	0.398156	0.0552125
2.33	Evc-Related Ellis-Van Creveld Syndrome	Genetic diseases	1	1	EVC	http://www.malacards.org/card/evc_related_ellis_van_creveld_syndrome	Genetic Tests	EVC			0.6008	0.30821	0.12797	0.387516	0.0441588
2.67	5q35 Microduplication Syndrome	Rare diseases, Fetal diseases	1	1	NSD1	http://www.malacards.org/card/5q35_microduplication_syndrome	Role in phenotype	NSD1			0.600646	0.419852	0.0672724	0.250469	0.0822885
2.67	Deletion 5q35	Rare diseases, Fetal diseases	2	1	NSD1	http://www.malacards.org/card/deletion_5q35	Role in phenotype	NSD1			0.600646	0.419852	0.0672724	0.250469	0.0822885
3.84	Respiratory Syncytial Virus Infectious Disease	Respiratory diseases, Infectious diseases	388	7	ARL4A, BCAR3, CXorf57, FGF9, HMGXB4, MXI1, RTN1	http://www.malacards.org/card/respiratory_syncytial_virus_infectious_disease			Blood	ARL4A, BCAR3, CXorf57, FGF9, HMGXB4, MXI1, RTN1	0.600473	0.242191	0.0678735	0.270914	0.17784
3.31	Hereditary Breast Ovarian Cancer	Reproductive diseases, Cancer diseases, Rare diseases, Genetic diseases	20	2	BRCA2, MLH1	http://www.malacards.org/card/hereditary_breast_ovarian_cancer	Causative germline mutation	BRCA2			0.600397	0.253067	0.153702	0.355135	0.119899
2.62	Female Breast Cancer	Cancer diseases	13	2	BRCA2, CDKN1B	http://www.malacards.org/card/female_breast_cancer					0.600188	0.378118	0.0801251	0.301894	0.154548
2.83	Seckel Syndrome 6	Neuronal diseases, Bone diseases, Rare diseases, Fetal diseases, Genetic diseases	1	1	CEP63	http://www.malacards.org/card/seckel_syndrome_6	Pathogenic, Genetic Tests	CEP63			0.599184	0.150994	0.0611168	0.325956	0.0689062
2.83	Mendelian Susceptibility to Mycobacterial Diseases Due to Complete Il12b Deficiency	Blood diseases, Rare diseases	1	1	IL12B	http://www.malacards.org/card/mendelian_susceptibility_to_mycobacterial_diseases_due_to_complete_il12b_deficiency	Causative germline mutation	IL12B			0.598411	0.264498	0.151398	0.293222	0.102328
2.83	Immunodeficiency 29, Mycobacteriosis	Immune diseases, Genetic diseases	1	1	IL12B	http://www.malacards.org/card/immunodeficiency_29_mycobacteriosis	Pathogenic, Molecular basis known	IL12B			0.598411	0.264498	0.151398	0.293222	0.102328
2.33	Pomt2-Related Muscle Diseases	Neuronal diseases, Muscle diseases, Genetic diseases	1	1	POMT2	http://www.malacards.org/card/pomt2_related_muscle_diseases	Genetic Tests	POMT2			0.598407	0.315959	0.14661	0.265094	0.141224
2.83	Peroxisome Biogenesis Disorder 7a	Endocrine diseases, Eye diseases, Neuronal diseases, Liver diseases, Nephrological diseases, Rare diseases, Fetal diseases, Genetic diseases, Metabolic diseases	1	1	PEX26	http://www.malacards.org/card/peroxisome_biogenesis_disorder_7a	Pathogenic, Causative mutation Ð Humsavar, Molecular basis known	PEX26			0.597907	0.327653	0.0723467	0.423916	0.0860986
2.83	Peroxisome Biogenesis Disorder 7b	Endocrine diseases, Eye diseases, Neuronal diseases, Liver diseases, Nephrological diseases, Rare diseases, Fetal diseases, Genetic diseases, Metabolic diseases	1	1	PEX26	http://www.malacards.org/card/peroxisome_biogenesis_disorder_7b	Pathogenic, Causative mutation Ð Humsavar, Molecular basis known	PEX26			0.597907	0.327653	0.0723467	0.423916	0.0860986
3.94	Amyotrophic Lateral Sclerosis 11	Neuronal diseases, Mental diseases, Rare diseases, Genetic diseases	9	2	ALS2, MCM3AP	http://www.malacards.org/card/amyotrophic_lateral_sclerosis_11	Molecular basis known	MCM3AP			0.597689	0.277925	0.17596	0.294063	0.088458
3	Entropion	Eye diseases	7	2	JPH1, MBD5	http://www.malacards.org/card/entropion					0.597565	0.239623	0.0935189	0.282947	0.0153655
3.26	Leukemia, Acute Promyelocytic, Somatic	Immune diseases, Blood diseases, Cancer diseases, Rare diseases, Genetic diseases	60	3	BCL2, RUNX1T1, TBL1XR1	http://www.malacards.org/card/leukemia_acute_promyelocytic_somatic	Gene fusion	TBL1XR1			0.596554	0.205294	0.0621212	0.289528	0.0999229
2.11	Brca2 Hereditary Breast and Ovarian Cancer Syndrome	Cancer diseases, Rare diseases, Genetic diseases	6	1	BRCA2	http://www.malacards.org/card/brca2_hereditary_breast_and_ovarian_cancer_syndrome	Genetic Tests	BRCA2			0.595354	0.392934	0.0851356	0.388171	0.192299
2.34	Polycystic Ovary Syndrome	Endocrine diseases, Rare diseases	23	2	CAPN10, IRS1	http://www.malacards.org/card/polycystic_ovary_syndrome					0.595173	0.275268	0.166648	0.226463	0.131771
2.83	Multiple Acyl-Coa Dehydrogenation Deficiency, Severe Neonatal Type	Neuronal diseases, Rare diseases, Metabolic diseases	3	1	ETFDH	http://www.malacards.org/card/multiple_acyl_coa_dehydrogenation_deficiency_severe_neonatal_type	Causative germline mutation	ETFDH			0.593725	0.346735	0.0262426	0.359797	0.0825277
2.83	Multiple Acyl-Coa Dehydrogenation Deficiency, Mild Type	Neuronal diseases, Rare diseases, Metabolic diseases	3	1	ETFDH	http://www.malacards.org/card/multiple_acyl_coa_dehydrogenation_deficiency_mild_type	Causative germline mutation	ETFDH			0.593725	0.346735	0.0262426	0.359797	0.0825277
2.62	Transverse Colon Cancer	Gastrointestinal diseases, Cancer diseases	13	2	DSC2, PIK3C2A	http://www.malacards.org/card/transverse_colon_cancer					0.591795	0.328742	0.126348	0.244411	0.104156
2.38	Breast Disease		21	2	CAT, PLAU	http://www.malacards.org/card/breast_disease					0.590949	0.281587	0.187626	0.217174	0.139316
2.69	Quebec Platelet Disorder	Blood diseases, Rare diseases, Genetic diseases	8	1	PLAU	http://www.malacards.org/card/quebec_platelet_disorder	Genetic Tests, Molecular basis known, Causative germline mutation	PLAU			0.590813	0.205603	0.153611	0.278273	0.0251096
5.22	Alcoholic Hepatitis	Gastrointestinal diseases, Liver diseases	412	9	ADGRA3, CENPU, DTNA, EPB41L4B, HINT3, KLHL29, PPM1K, RASEF, THBS2	http://www.malacards.org/card/alcoholic_hepatitis			Liver	ADGRA3, CENPU, DTNA, EPB41L4B, HINT3, KLHL29, PPM1K, RASEF, THBS2	0.59053	0.207473	0.151215	0.238049	0.151504
1.5	Photosensitive Epilepsy	Neuronal diseases, Rare diseases	7	1	CHD2	http://www.malacards.org/card/photosensitive_epilepsy					0.590151	0.393041	0.0187078	0.362943	0.0601954
2.83	Autosomal Recessive Cerebellar Ataxia-Psychomotor Retardation Syndrome	Neuronal diseases, Rare diseases	1	1	SYT14	http://www.malacards.org/card/autosomal_recessive_cerebellar_ataxia_psychomotor_retardation_syndrome	Causative germline mutation	SYT14			0.589958	0.243063	0.0208255	0.378163	0.0125661
2.83	Spinocerebellar Ataxia, Autosomal Recessive 11	Skin diseases, Eye diseases, Neuronal diseases, Ear diseases, Mental diseases, Rare diseases, Genetic diseases, Metabolic diseases	1	1	SYT14	http://www.malacards.org/card/spinocerebellar_ataxia_autosomal_recessive_11	Pathogenic, Causative mutation Ð Humsavar, Molecular basis known	SYT14			0.589958	0.243063	0.0208255	0.378163	0.0125661
3	Spinocerebellar Ataxia 27	Skin diseases, Eye diseases, Neuronal diseases, Ear diseases, Mental diseases, Rare diseases, Genetic diseases, Metabolic diseases	4	2	GRM1, KCNA1	http://www.malacards.org/card/spinocerebellar_ataxia_27					0.589344	0.246346	0.0618517	0.226014	0.0951791
3	Posterior Uveal Melanoma	Skin diseases, Eye diseases, Neuronal diseases, Cancer diseases, Rare diseases, Genetic diseases	6	2	MITF, THBS2	http://www.malacards.org/card/posterior_uveal_melanoma					0.587486	0.303436	0.164202	0.229413	0.141584
4.35	Psoriasis	Skin diseases, Rare diseases, Genetic diseases	392	9	ANXA11, BCAR3, DSC2, FRMD4A, ID4, IL12B, LONRF1, SLIT2, TPD52L1	http://www.malacards.org/card/psoriasis			Skin	ANXA11, BCAR3, DSC2, FRMD4A, ID4, LONRF1, SLIT2, TPD52L1	0.587426	0.252724	0.105857	0.305135	0.098792
5.25	Vici Syndrome	Skin diseases, Eye diseases, Neuronal diseases, Immune diseases, Blood diseases, Rare diseases, Fetal diseases, Genetic diseases	12	4	ATG5, SIX3, TECPR2, ZFYVE26	http://www.malacards.org/card/vici_syndrome					0.586953	0.280123	0.152901	0.270585	0.104888
2.83	Myopathy, Centronuclear, Autosomal Recessive	Neuronal diseases, Muscle diseases, Rare diseases, Genetic diseases	3	1	BIN1	http://www.malacards.org/card/myopathy_centronuclear_autosomal_recessive	Pathogenic, Causative mutation Ð Humsavar, Genetic Tests, Molecular basis known, Causative germline mutation	BIN1			0.585894	0.277128	0.0703073	0.114249	0.30115
2.15	Herpes Simplex	Oral diseases, Reproductive diseases, Rare diseases, Infectious diseases	65	2	HCFC2, TBP	http://www.malacards.org/card/herpes_simplex					0.585178	0.266548	0.14922	0.368369	0.068261
2.2	Muscular Dystrophy, Congenital	Neuronal diseases, Cardiovascular diseases, Muscle diseases, Rare diseases, Genetic diseases	21	1	POMT2	http://www.malacards.org/card/muscular_dystrophy_congenital	Pathogenic	POMT2			0.584399	0.308563	0.143178	0.258889	0.137918
1.5	Segmental Dystonia	Neuronal diseases	7	1	GNAL	http://www.malacards.org/card/segmental_dystonia					0.583993	0.246445	0.0928549	0.394779	0.0577569
2.72	Lymphosarcoma	Immune diseases, Cancer diseases, Rare diseases	11	2	BCL2, NR3C1	http://www.malacards.org/card/lymphosarcoma					0.583857	0.205051	0.0938259	0.30273	0.0561963
3.56	Calpainopathy	Muscle diseases, Rare diseases, Genetic diseases	234	6	CAPN10, HINT3, LPIN1, SGCB, SH3BGRL, XPO4	http://www.malacards.org/card/calpainopathy			Skeletal Muscle	HINT3, LPIN1, SH3BGRL, XPO4	0.583745	0.232914	0.166776	0.208494	0.120709
2.83	Nephronophthisis 13	Nephrological diseases, Rare diseases, Genetic diseases	2	1	WDR19	http://www.malacards.org/card/nephronophthisis_13	Pathogenic, Causative mutation Ð Humsavar, Genetic Tests, Molecular basis known	WDR19			0.582247	0.379625	0.0312084	0.24105	0.0756921
2.83	Cranioectodermal Dysplasia 4	Skin diseases, Bone diseases, Respiratory diseases, Nephrological diseases, Rare diseases, Fetal diseases, Genetic diseases	2	1	WDR19	http://www.malacards.org/card/cranioectodermal_dysplasia_4	Pathogenic, Causative mutation Ð Humsavar, Genetic Tests	WDR19			0.582247	0.379625	0.0312084	0.24105	0.0756921
2.83	Senior-Loken Syndrome 8	Eye diseases, Nephrological diseases, Rare diseases, Genetic diseases	2	1	WDR19	http://www.malacards.org/card/senior_loken_syndrome_8	Pathogenic, Causative mutation Ð Humsavar, Genetic Tests, Molecular basis known	WDR19			0.582247	0.379625	0.0312084	0.24105	0.0756921
2.83	Short-Rib Thoracic Dysplasia 5 with or Without Polydactyly	Genetic diseases	2	1	WDR19	http://www.malacards.org/card/short_rib_thoracic_dysplasia_5_with_or_without_polydactyly	Pathogenic, Causative mutation Ð Humsavar, Genetic Tests	WDR19			0.582247	0.379625	0.0312084	0.24105	0.0756921
1.5	Say-Barber-Biesecker Variant of Ohdo Syndrome	Neuronal diseases, Mental diseases, Genetic diseases	1	1	KAT6B	http://www.malacards.org/card/say_barber_biesecker_variant_of_ohdo_syndrome					0.581514	0.315181	0.0721077	0.35705	0.151194
1.5	Adult Medulloblastoma	Neuronal diseases, Cancer diseases, Rare diseases, Genetic diseases	5	1	KAT6B	http://www.malacards.org/card/adult_medulloblastoma					0.581514	0.315181	0.0721077	0.35705	0.151194
1.5	Conversion Disorder	Neuronal diseases, Mental diseases, Rare diseases	5	1	KAT6B	http://www.malacards.org/card/conversion_disorder					0.581514	0.315181	0.0721077	0.35705	0.151194
2.62	Peutz-Jeghers Syndrome	Skin diseases, Eye diseases, Gastrointestinal diseases, Cancer diseases, Rare diseases, Fetal diseases, Genetic diseases	12	2	BRCA2, CTNNB1	http://www.malacards.org/card/peutz_jeghers_syndrome					0.581218	0.379536	0.0417797	0.38157	0.108688
2.33	Angiokeratoma Corporis Diffusum with Arteriovenous Fistulas	Genetic diseases	1	1	KRIT1	http://www.malacards.org/card/angiokeratoma_corporis_diffusum_with_arteriovenous_fistulas	Genetic Tests	KRIT1			0.580567	0.306539	0.10218	0.244999	0.148625
2.33	Familial Cerebral Cavernous Malformation 1	Eye diseases, Neuronal diseases, Cardiovascular diseases, Rare diseases, Fetal diseases, Genetic diseases	1	1	KRIT1	http://www.malacards.org/card/familial_cerebral_cavernous_malformation_1	Genetic Tests	KRIT1			0.580567	0.306539	0.10218	0.244999	0.148625
2.83	Cone-Rod Dystrophy 19	Genetic diseases	1	1	TTLL5	http://www.malacards.org/card/cone_rod_dystrophy_19	Pathogenic, Causative mutation Ð Humsavar, Molecular basis known	TTLL5			0.580542	0.312912	0.097531	0.344842	0.0409862
2.25	Acute Leukemia	Immune diseases, Cancer diseases	28	2	AFF1, MLLT10	http://www.malacards.org/card/acute_leukemia					0.580059	0.267407	0.134574	0.338174	0.177498
2.91	Acrofacial Dysostosis	Bone diseases	10	2	EVC, EVC2	http://www.malacards.org/card/acrofacial_dysostosis					0.579524	0.277592	0.100258	0.350612	0.0650516
2.83	Ahi1-Related Joubert Syndrome	Neuronal diseases, Nephrological diseases, Rare diseases, Fetal diseases, Genetic diseases	1	1	AHI1	http://www.malacards.org/card/ahi1_related_joubert_syndrome	Pathogenic, Genetic Tests	AHI1			0.579344	0.231738	0.122821	0.244483	0.130352
2.83	Joubert Syndrome-3	Neuronal diseases, Nephrological diseases, Rare diseases, Fetal diseases, Genetic diseases	1	1	AHI1	http://www.malacards.org/card/joubert_syndrome_3	Causative mutation Ð Humsavar, Molecular basis known	AHI1			0.579344	0.231738	0.122821	0.244483	0.130352
1.39	Meesmann Corneal Dystrophy	Eye diseases, Rare diseases, Genetic diseases	8	1	CEP152	http://www.malacards.org/card/meesmann_corneal_dystrophy					0.578605	0.387665	0.126136	0.34832	0.112249
1.39	Vulvar Melanoma	Skin diseases, Cancer diseases	10	1	EIF2AK3	http://www.malacards.org/card/vulvar_melanoma					0.578559	0.422926	0.0275394	0.393998	0.0147532
1.39	Acneiform Dermatitis	Skin diseases	10	1	EIF2AK3	http://www.malacards.org/card/acneiform_dermatitis					0.578559	0.422926	0.0275394	0.393998	0.0147532
2.83	Myoglobinuria, Acute Recurrent, Autosomal Recessive	Neuronal diseases, Muscle diseases, Rare diseases, Genetic diseases, Metabolic diseases	1	1	LPIN1	http://www.malacards.org/card/myoglobinuria_acute_recurrent_autosomal_recessive	Pathogenic, Genetic Tests, Molecular basis known	LPIN1			0.578119	0.13528	0.0803585	0.281544	0.15667
2.83	Genetic Recurrent Myoglobinuria	Neuronal diseases, Rare diseases, Metabolic diseases	3	1	LPIN1	http://www.malacards.org/card/genetic_recurrent_myoglobinuria	Causative germline mutation	LPIN1			0.578119	0.13528	0.0803585	0.281544	0.15667
1.5	Mesenchymal Chondrosarcoma	Cancer diseases	7	1	NCOA2	http://www.malacards.org/card/mesenchymal_chondrosarcoma					0.577624	0.319426	0.142095	0.302097	0.169244
1.5	Indeterminate Cell Histiocytosis	Skin diseases, Cancer diseases, Rare diseases	1	1	NCOA2	http://www.malacards.org/card/indeterminate_cell_histiocytosis					0.577624	0.319426	0.142095	0.302097	0.169244
2.14	Muscle Eye Brain Disease	Eye diseases, Neuronal diseases, Muscle diseases, Rare diseases, Fetal diseases, Genetic diseases, Metabolic diseases	20	1	POMT2	http://www.malacards.org/card/muscle_eye_brain_disease_2	Causative germline mutation	POMT2			0.577495	0.304918	0.141486	0.25583	0.136289
5.29	Osteoarthritis	Bone diseases, Genetic diseases	418	11	ARNTL, BNIP3, BTG1, CDC42EP3, DDIT4, FLT1, FOXO3, PNRC1, RPGR, RTN1, WWC1	http://www.malacards.org/card/osteoarthritis			Cartilage	ARNTL, BNIP3, BTG1, CDC42EP3, DDIT4, FLT1, FOXO3, PNRC1, RPGR, RTN1, WWC1	0.577156	0.281442	0.103962	0.265707	0.100189
2.08	Familial Idiopathic Steroid-Resistant Nephrotic Syndrome with Focal Segmental Hyalinosis	Nephrological diseases, Rare diseases, Genetic diseases	17	1	NUP107	http://www.malacards.org/card/familial_idiopathic_steroid_resistant_nephrotic_syndrome_with_focal_segmental_hyalinosis	Causative germline mutation	NUP107			0.577124	0.197376	0.131584	0.466316	0.0111962
2.83	Microcephaly and Chorioretinopathy, Autosomal Recessive, 3	Eye diseases, Neuronal diseases, Immune diseases, Mental diseases, Rare diseases, Genetic diseases	1	1	TUBGCP4	http://www.malacards.org/card/microcephaly_and_chorioretinopathy_autosomal_recessive_3	Pathogenic, Molecular basis known	TUBGCP4			0.576797	0.348962	0.282054	0.182845	0.25033
2.79	Joubert Syndrome with Ocular Anomalies	Eye diseases, Neuronal diseases, Rare diseases, Fetal diseases	4	1	AHI1	http://www.malacards.org/card/joubert_syndrome_with_ocular_anomalies	Pathogenic, Causative germline mutation	AHI1			0.576679	0.230672	0.122256	0.243358	0.129753
2.42	Axonal Neuropathy	Neuronal diseases, Rare diseases	19	2	GDAP1, ZFYVE26	http://www.malacards.org/card/axonal_neuropathy					0.576664	0.231242	0.130038	0.322067	0.114122
1.5	Pediatric Hypertension	Rare diseases	3	1	ADD1	http://www.malacards.org/card/pediatric_hypertension					0.576256	0.356126	0.00190741	0.409142	0.0175758
3.41	Desmoid Tumor	Muscle diseases, Cancer diseases, Rare diseases, Genetic diseases	20	2	CDKN1B, CTNNB1	http://www.malacards.org/card/desmoid_tumor	Causative somatic mutation	CTNNB1			0.576232	0.358992	0.0359471	0.292438	0.0700122
2.43	Acute Mountain Sickness	Rare diseases	19	2	FLT1, PIK3C2A	http://www.malacards.org/card/acute_mountain_sickness					0.576028	0.28427	0.0367218	0.35973	0.11607
3.14	Female Reproductive Organ Cancer	Reproductive diseases, Cancer diseases	43	3	BRCA2, CTNNB1, MLH1	http://www.malacards.org/card/female_reproductive_organ_cancer					0.575929	0.285853	0.0984389	0.354004	0.0864661
2.67	2q23.1 Microdeletion Syndrome	Rare diseases, Fetal diseases	1	1	MBD5	http://www.malacards.org/card/2q231_microdeletion_syndrome	Role in phenotype	MBD5			0.575665	0.140462	0.0794418	0.267684	0.000130676
2.33	Gdap1-Related Intermediate Charcot-Marie-Tooth Neuropathy	Neuronal diseases, Ear diseases, Mental diseases, Rare diseases, Genetic diseases	1	1	GDAP1	http://www.malacards.org/card/gdap1_related_intermediate_charcot_marie_tooth_neuropathy	Genetic Tests	GDAP1			0.575593	0.282616	0.200882	0.261895	0.17498
2.33	Charcot-Marie-Tooth Neuropathy Type 2h/2k	Neuronal diseases, Ear diseases, Mental diseases, Rare diseases, Genetic diseases	1	1	GDAP1	http://www.malacards.org/card/charcot_marie_tooth_neuropathy_type_2h_2k	Genetic Tests	GDAP1			0.575593	0.282616	0.200882	0.261895	0.17498
1.46	Blepharospasm	Eye diseases, Neuronal diseases, Rare diseases, Genetic diseases	8	1	GNAL	http://www.malacards.org/card/blepharospasm					0.575014	0.242656	0.0914272	0.388709	0.0568689
2.68	Lung Cancer Susceptibility 3	Respiratory diseases, Cancer diseases, Rare diseases, Genetic diseases	368	6	C1orf21, CXorf57, GRIA1, HMGB3, THBS2, TTK	http://www.malacards.org/card/lung_cancer_susceptibility_3			Lung	C1orf21, CXorf57, GRIA1, HMGB3, THBS2, TTK	0.574319	0.275673	0.132955	0.27955	0.103607
2.62	Extrapulmonary Tuberculosis	Infectious diseases	13	2	SLC11A1, TBP	http://www.malacards.org/card/extrapulmonary_tuberculosis					0.572684	0.247399	0.117057	0.356782	0.0656868
2.61	Polycystic Kidney Disease 2	Nephrological diseases, Rare diseases, Genetic diseases	9	1	PKD2	http://www.malacards.org/card/polycystic_kidney_disease_2	Pathogenic, Causative mutation Ð Humsavar, Genetic Tests, Molecular basis known	PKD2			0.572517	0.233587	0.00193511	0.356106	0.00704196
2.39	Autosomal Dominant Progressive External Ophthalmoplegia	Eye diseases, Neuronal diseases, Muscle diseases, Rare diseases, Genetic diseases, Metabolic diseases	11	1	RRM2B	http://www.malacards.org/card/autosomal_dominant_progressive_external_ophthalmoplegia	Causative germline mutation	RRM2B			0.571782	0.337351	0.283604	0.241292	0.215562
3.29	Systemic Onset Juvenile Idiopathic Arthritis	Bone diseases, Respiratory diseases, Rare diseases	225	6	AMPH, DDIT4, FAM207A, GAS6, HMGB3, KLF10	http://www.malacards.org/card/systemic_onset_juvenile_idiopathic_arthritis			Blood	AMPH, DDIT4, FAM207A, GAS6, HMGB3, KLF10	0.571772	0.24834	0.0938955	0.279406	0.0762649
2.35	Aplasia Cutis Congenita	Skin diseases, Rare diseases, Genetic diseases	15	1	DLL4	http://www.malacards.org/card/aplasia_cutis_congenita	Causative germline mutation	DLL4			0.571478	0.374889	0.0805784	0.424608	0.0582907
3.52	Polycystic Kidney Disease	Nephrological diseases, Rare diseases, Genetic diseases	422	7	ALDH1L2, ANKDD1A, BEND6, BHLHE41, GALNT15, PKD2, THBS2	http://www.malacards.org/card/polycystic_kidney_disease			Kidney	ALDH1L2, ANKDD1A, BEND6, BHLHE41, GALNT15, THBS2	0.57126	0.27853	0.0886008	0.234625	0.114562
3.05	Reproductive Organ Cancer	Cancer diseases	51	3	BRCA2, CTNNB1, MLH1	http://www.malacards.org/card/reproductive_organ_cancer					0.571185	0.283498	0.0976281	0.351088	0.0857539
2.33	Weaver Syndrome 1	Skin diseases, Neuronal diseases, Rare diseases, Fetal diseases, Genetic diseases	1	1	NSD1	http://www.malacards.org/card/weaver_syndrome_1	Genetic Tests	NSD1			0.570889	0.399051	0.0639396	0.238061	0.0782118
2.2	Cowden Disease	Skin diseases, Neuronal diseases, Gastrointestinal diseases, Cancer diseases, Rare diseases, Fetal diseases, Genetic diseases	25	2	BRCA2, JPH1	http://www.malacards.org/card/cowden_disease					0.570235	0.347273	0.0906674	0.323324	0.106691
3.29	Autosomal Dominant Disease	Genetic diseases	33	3	MLH1, MLH3, PKD2	http://www.malacards.org/card/autosomal_dominant_disease					0.569985	0.165486	0.202607	0.275683	0.10995
2.23	Fundus Dystrophy	Eye diseases	27	2	AHI1, LCA5	http://www.malacards.org/card/fundus_dystrophy					0.569711	0.31562	0.104827	0.288844	0.0847446
2.65	Nephronophthisis 4	Nephrological diseases, Rare diseases, Genetic diseases	5	1	WDR19	http://www.malacards.org/card/nephronophthisis_4	Causative germline mutation	WDR19			0.569585	0.37137	0.0305298	0.235808	0.0740461
3.85	Macular Degeneration, Age-Related, 1	Eye diseases, Neuronal diseases, Rare diseases, Genetic diseases	387	6	CDH18, FAM84A, FGF9, FLT1, TGFB2, THBS2	http://www.malacards.org/card/macular_degeneration_age_related_1			Eye	CDH18, FAM84A, FGF9, TGFB2, THBS2	0.569265	0.234253	0.144793	0.280173	0.0948206
2.92	Diabetic Encephalopathy	Neuronal diseases	8	2	CAT, MYLK	http://www.malacards.org/card/diabetic_encephalopathy					0.568889	0.259129	0.115996	0.261404	0.188302
1.91	Familial Breast Cancer	Reproductive diseases, Cancer diseases, Rare diseases, Genetic diseases	31	1	BRCA2	http://www.malacards.org/card/familial_breast_cancer	Susceptibility factor	BRCA2			0.568664	0.375318	0.081319	0.370769	0.183679
1.5	Cribriform Carcinoma	Cancer diseases	5	1	IRS4	http://www.malacards.org/card/cribriform_carcinoma					0.568574	0.292816	0.0938148	0.36275	0.0284856
1.5	Erythroplakia	Rare diseases	3	1	BMI1	http://www.malacards.org/card/erythroplakia					0.567948	0.208437	0.155618	0.353832	0.168113
2.77	Morgagni Cataract	Eye diseases	10	2	RNF8, TGFB2	http://www.malacards.org/card/morgagni_cataract					0.567707	0.207497	0.202104	0.348004	0.0572447
2.58	Encephalopathy	Neuronal diseases, Rare diseases, Metabolic diseases	22	2	ARX, SERAC1	http://www.malacards.org/card/encephalopathy_familial_infantile					0.567629	0.271043	0.107849	0.356471	0.0733092
2.29	Myositis	Neuronal diseases, Muscle diseases, Rare diseases	26	2	CHKA, PIK3C2A	http://www.malacards.org/card/myositis					0.566958	0.226783	0.0433439	0.209491	0.0765393
2.99	Tuberculosis	Endocrine diseases, Neuronal diseases, Cardiovascular diseases, Reproductive diseases, Respiratory diseases, Rare diseases, Infectious diseases	35	2	IL12B, SLC11A1	http://www.malacards.org/card/tuberculosis	Susceptibility factor	SLC11A1			0.566773	0.274318	0.0948777	0.312292	0.0613248
2.83	Colorectal Cancer, Hereditary Nonpolyposis, Type 7	Cancer diseases, Genetic diseases	1	1	MLH3	http://www.malacards.org/card/colorectal_cancer_hereditary_nonpolyposis_type_7	Pathogenic, Causative mutation Ð Humsavar, Molecular basis known	MLH3			0.566681	0.158671	0.393277	0.168871	0.277674
3.45	Renal Oncocytoma	Nephrological diseases, Cancer diseases, Rare diseases, Genetic diseases	323	7	ATL2, FLRT3, IL12B, PTPRD, SLIT2, TTK, WWC1	http://www.malacards.org/card/renal_oncocytoma			Kidney	ATL2, FLRT3, IL12B, PTPRD, SLIT2, TTK, WWC1	0.566412	0.230708	0.116541	0.219128	0.138852
2.83	Multiple Endocrine Neoplasia, Type Iv	Endocrine diseases, Neuronal diseases, Gastrointestinal diseases, Cancer diseases, Rare diseases, Genetic diseases	1	1	CDKN1B	http://www.malacards.org/card/multiple_endocrine_neoplasia_type_iv	Pathogenic, Genetic Tests, Molecular basis known, Causative germline mutation	CDKN1B			0.566088	0.339653	0.070195	0.200395	0.108689
2.33	Rrm2b-Related Mitochondrial Dna Depletion Syndrome, Encephalomyopathic Form, with Renal Tubulopathy	Nephrological diseases, Genetic diseases	1	1	RRM2B	http://www.malacards.org/card/rrm2b_related_mitochondrial_dna_depletion_syndrome_encephalomyopathic_form_with_renal_tubulopathy	Genetic Tests	RRM2B			0.566057	0.333974	0.280764	0.238876	0.213403
1.34	Primary Microcephaly	Eye diseases, Neuronal diseases, Mental diseases, Rare diseases, Fetal diseases, Genetic diseases	19	1	CEP152	http://www.malacards.org/card/primary_microcephaly					0.566015	0.37923	0.123391	0.340741	0.109807
1.88	Malignant Melanoma, Somatic	Skin diseases, Endocrine diseases, Eye diseases, Cancer diseases, Rare diseases, Genetic diseases	30	1	MITF	http://www.malacards.org/card/malignant_melanoma_somatic	Susceptibility factor	MITF			0.565932	0.325977	0.106961	0.335598	0.143181
2.28	Sotos Syndrome 1	Eye diseases, Cancer diseases, Rare diseases, Fetal diseases, Genetic diseases	17	1	NSD1	http://www.malacards.org/card/sotos_syndrome_1	Pathogenic, Causative mutation Ð Humsavar, Genetic Tests, Molecular basis known, Causative germline mutation	NSD1			0.565891	0.395558	0.0633798	0.235977	0.0775271
1.42	Cervical Dystonia	Neuronal diseases, Rare diseases	9	1	GNAL	http://www.malacards.org/card/cervical_dystonia					0.565782	0.23876	0.0899593	0.382468	0.0559558
2.83	Hermansky-Pudlak Syndrome Without Pulmonary Fibrosis	Skin diseases, Eye diseases, Blood diseases, Rare diseases, Metabolic diseases	3	1	HPS3	http://www.malacards.org/card/hermansky_pudlak_syndrome_without_pulmonary_fibrosis	Causative germline mutation	HPS3			0.564746	0.14514	0.205003	0.244535	0.09996
2.83	Hermansky-Pudlak Syndrome 3	Skin diseases, Eye diseases, Blood diseases, Rare diseases, Genetic diseases, Metabolic diseases	3	1	HPS3	http://www.malacards.org/card/hermansky_pudlak_syndrome_3	Pathogenic, Causative mutation Ð Humsavar, Genetic Tests, Molecular basis known	HPS3			0.564746	0.14514	0.205003	0.244535	0.09996
3	Amyotrophic Lateral Sclerosis Type 4	Neuronal diseases, Mental diseases, Rare diseases, Genetic diseases	6	2	ALS2, SUGCT	http://www.malacards.org/card/amyotrophic_lateral_sclerosis_type_4_2					0.563865	0.23485	0.259096	0.288981	0.155909
4.71	Chronic Interstitial Cystitis	Nephrological diseases, Rare diseases	579	11	ARFGEF3, CACNA1D, FBXL21, FGF9, FRMPD4, GSTO2, KIAA1217, KLF5, MAB21L3, PTPRR, WWC1	http://www.malacards.org/card/chronic_interstitial_cystitis			Urinary System	ARFGEF3, CACNA1D, FBXL21, FGF9, FRMPD4, GSTO2, KIAA1217, KLF5, MAB21L3, PTPRR, WWC1	0.563694	0.217253	0.0921384	0.204929	0.105846
3.34	Congenital Nervous System Abnormality	Neuronal diseases, Immune diseases	30	3	ARX, CEP63, SIX3	http://www.malacards.org/card/congenital_nervous_system_abnormality					0.563585	0.240463	0.0832227	0.303209	0.0594207
1.42	Ohdo Syndrome		9	1	KAT6B	http://www.malacards.org/card/ohdo_syndrome					0.56338	0.305352	0.0698591	0.345915	0.146479
3.06	Cone-Rod Dystrophy	Eye diseases, Neuronal diseases, Rare diseases, Genetic diseases	36	2	RPGR, TTLL5	http://www.malacards.org/card/cone_rod_dystrophy	Molecular basis known	RPGR			0.56326	0.288953	0.113779	0.328099	0.0821234
1.5	Jensen Syndrome	Rare diseases, Genetic diseases	5	1	AGFG1	http://www.malacards.org/card/jensen_syndrome					0.562877	0.256672	0.117078	0.402457	0.0934376
2.23	Alopecia		29	2	ATR, CTNNB1	http://www.malacards.org/card/alopecia					0.562723	0.319345	0.0387621	0.386309	0.0517705
3	Glycogen Storage Disease Type 0	Endocrine diseases, Cardiovascular diseases, Liver diseases, Rare diseases, Genetic diseases, Metabolic diseases	5	2	AGL, GYG2	http://www.malacards.org/card/glycogen_storage_disease_type_0					0.562711	0.24506	0.128776	0.237464	0.120392
1.9	Scleroderma		76	2	CCDC186, PCNP	http://www.malacards.org/card/scleroderma			Blood	CCDC186, PCNP	0.562707	0.164311	0.177534	0.301611	0.0912149
3.56	Multiple Synostoses Syndrome	Bone diseases, Ear diseases, Rare diseases, Fetal diseases, Genetic diseases	15	2	ACVR2A, FGF9	http://www.malacards.org/card/multiple_synostoses_syndrome	Causative germline mutation	FGF9			0.56258	0.292823	0.10478	0.229814	0.0679203
3.7	Duchenne Muscular Dystrophy	Eye diseases, Neuronal diseases, Muscle diseases, Rare diseases, Genetic diseases	321	5	BTG1, DTNA, LPIN1, PIK3C2A, SH3BGRL	http://www.malacards.org/card/duchenne_muscular_dystrophy			Skeletal Muscle	BTG1, LPIN1, SH3BGRL	0.562281	0.205682	0.0385612	0.223225	0.101458
3.05	West Syndrome	Neuronal diseases, Rare diseases	33	2	ARX, TBL1XR1	http://www.malacards.org/card/west_syndrome	Pathogenic, Causative germline mutation	ARX			0.561652	0.264257	0.0647023	0.273525	0.0972501
2.83	Vacterl with Hydrocephalus	Neuronal diseases, Rare diseases, Fetal diseases, Genetic diseases	1	1	FANCB	http://www.malacards.org/card/vacterl_with_hydrocephalus	Causative germline mutation	FANCB			0.561543	0.37118	0.0249886	0.147124	0.15667
2.63	Atrioventricular Septal Defect	Cardiovascular diseases, Rare diseases, Genetic diseases	12	2	EVC, EVC2	http://www.malacards.org/card/atrioventricular_septal_defect					0.560475	0.268467	0.0969621	0.339087	0.0629133
3.65	Ectodermal Dysplasia 2, Clouston Type	Skin diseases, Rare diseases, Fetal diseases, Genetic diseases	17	3	EVC, EVC2, FGF9	http://www.malacards.org/card/ectodermal_dysplasia_2_clouston_type					0.560196	0.247607	0.122683	0.273376	0.0863636
2.83	Long Qt Syndrome 15	Rare diseases, Genetic diseases	3	1	CALM1	http://www.malacards.org/card/long_qt_syndrome_15	Causative mutation Ð Humsavar	CALM1			0.560075	0.252034	0.114815	0.236912	0.1529
2.83	Calm1-Related Catecholaminergic Polymorphic Ventricular Tachycardia	Cardiovascular diseases, Rare diseases, Genetic diseases	1	1	CALM1	http://www.malacards.org/card/calm1_related_catecholaminergic_polymorphic_ventricular_tachycardia	Pathogenic, Genetic Tests	CALM1			0.560075	0.252034	0.114815	0.236912	0.1529
2.83	Long Qt Syndrome 14	Rare diseases, Genetic diseases	3	1	CALM1	http://www.malacards.org/card/long_qt_syndrome_14	Pathogenic, Causative mutation Ð Humsavar, Genetic Tests, Molecular basis known	CALM1			0.560075	0.252034	0.114815	0.236912	0.1529
1.46	Boutonneuse Fever	Rare diseases, Infectious diseases	8	1	IRS4	http://www.malacards.org/card/boutonneuse_fever					0.559832	0.288313	0.0923723	0.357173	0.0280476
2.84	Organ System Cancer	Cancer diseases	80	3	BRCA2, CTNNB1, MLH1	http://www.malacards.org/card/organ_system_cancer					0.558895	0.277398	0.0955275	0.343534	0.0839088
2.59	Pituitary Stalk Interruption Syndrome	Endocrine diseases, Neuronal diseases, Rare diseases	7	1	GPR161	http://www.malacards.org/card/pituitary_stalk_interruption_syndrome	Causative germline mutation	GPR161			0.558555	0.371439	0.00363619	0.379818	0.0625582
1.42	Gastroschisis	Gastrointestinal diseases, Rare diseases, Fetal diseases	9	1	ADD1	http://www.malacards.org/card/gastroschisis					0.558286	0.345021	0.00184793	0.396383	0.0170277
2.27	Glioma	Rare diseases	35	2	BCL2, BRCA2	http://www.malacards.org/card/glioma					0.557985	0.195964	0.103785	0.366317	0.105041
2.33	Familial Atypical Mycobacteriosis, Il12b-Related	Rare diseases, Genetic diseases	1	1	IL12B	http://www.malacards.org/card/familial_atypical_mycobacteriosis_il12b_related	Genetic Tests	IL12B			0.557848	0.246569	0.141136	0.273346	0.0953921
2.79	Ventricular Tachycardia, Catecholaminergic Polymorphic, 2	Cardiovascular diseases, Rare diseases, Genetic diseases	5	1	CALM1	http://www.malacards.org/card/ventricular_tachycardia_catecholaminergic_polymorphic_2	Pathogenic	CALM1			0.557498	0.250874	0.114287	0.235822	0.152197
2.78	Ventricular Tachycardia, Catecholaminergic Polymorphic, 4	Cardiovascular diseases, Rare diseases, Genetic diseases	6	1	CALM1	http://www.malacards.org/card/ventricular_tachycardia_catecholaminergic_polymorphic_4	Pathogenic, Causative mutation Ð Humsavar, Molecular basis known	CALM1			0.556842	0.250579	0.114153	0.235544	0.152018
1.39	Rapadilino Syndrome	Bone diseases, Smell/Taste diseases, Rare diseases, Fetal diseases, Genetic diseases	8	1	KAT6B	http://www.malacards.org/card/rapadilino_syndrome					0.556316	0.301523	0.0689832	0.341578	0.144642
1.38	Pseudohypoparathyroidism	Skin diseases, Endocrine diseases, Eye diseases, Bone diseases, Nephrological diseases, Rare diseases, Fetal diseases, Genetic diseases, Metabolic diseases	10	1	GNAL	http://www.malacards.org/card/pseudohypoparathyroidism					0.55629	0.234755	0.0884502	0.376052	0.0550171
3.52	Arrhythmogenic Right Ventricular Cardiomyopathy	Cardiovascular diseases, Rare diseases, Genetic diseases	15	2	CTNNB1, DSC2	http://www.malacards.org/card/arrhythmogenic_right_ventricular_cardiomyopathy	Pathogenic	DSC2			0.555703	0.365375	0.0996837	0.263125	0.054181
1.96	Hypertension, Essential	Cardiovascular diseases, Blood diseases, Rare diseases, Genetic diseases	90	3	ADD1, COQ3, NR3C1	http://www.malacards.org/card/hypertension_essential			Blood	COQ3	0.554421	0.343556	0.0479963	0.327478	0.0490478
2.29	Sensory System Cancer	Neuronal diseases, Cancer diseases	26	2	CDKN1B, GNA11	http://www.malacards.org/card/sensory_system_cancer					0.554036	0.313584	0.0692545	0.19419	0.115794
2.83	Deafness, Autosomal Recessive 102	Neuronal diseases, Ear diseases, Cardiovascular diseases, Rare diseases, Genetic diseases	1	1	EPS8	http://www.malacards.org/card/deafness_autosomal_recessive_102	Pathogenic	EPS8			0.554013	0.169528	0.032576	0.325206	0.0468695
1.38	Blepharophimosis	Eye diseases, Rare diseases	10	1	KAT6B	http://www.malacards.org/card/blepharophimosis					0.553929	0.300229	0.0686872	0.340112	0.144021
2.22	Myeloid Leukemia	Immune diseases, Blood diseases, Cancer diseases, Rare diseases, Genetic diseases	41	2	NSD1, RUNX1T1	http://www.malacards.org/card/myeloid_leukemia					0.553286	0.327545	0.0381767	0.230167	0.0702673
2.82	Amyotrophic Lateral Sclerosis 3	Neuronal diseases, Mental diseases, Rare diseases, Genetic diseases	9	2	ALS2, SUGCT	http://www.malacards.org/card/amyotrophic_lateral_sclerosis_3					0.553161	0.230392	0.254178	0.283495	0.152949
2.67	Monomelic Amyotrophy	Neuronal diseases, Muscle diseases, Rare diseases	3	1	CEP126	http://www.malacards.org/card/monomelic_amyotrophy	Susceptibility factor	CEP126			0.552726	0.128785	0.240436	0.229934	0.116073
3.13	Muscular Dystrophy	Neuronal diseases, Cardiovascular diseases, Muscle diseases, Rare diseases, Genetic diseases	39	2	POMT2, SGCB	http://www.malacards.org/card/muscular_dystrophy	Pathogenic	POMT2			0.55216	0.231355	0.193808	0.152672	0.169789
1.42	Exostosis	Bone diseases	9	1	IRS4	http://www.malacards.org/card/exostosis					0.550844	0.283685	0.0908892	0.351438	0.0275973
1.46	Eczema Herpeticum	Skin diseases, Eye diseases, Infectious diseases	8	1	IRF2	http://www.malacards.org/card/eczema_herpeticum					0.550645	0.323779	0.116737	0.390958	0.0101319
2.9	Crohn's Disease	Gastrointestinal diseases, Rare diseases, Genetic diseases, Infectious diseases	84	3	DLG5, MXI1, SLC11A1	http://www.malacards.org/card/crohns_disease			Colon	MXI1	0.550233	0.232198	0.0287772	0.224678	0.146069
2.72	Thoracic Aortic Aneurysm	Cardiovascular diseases, Rare diseases, Genetic diseases	11	2	MYLK, TGFB2	http://www.malacards.org/card/thoracic_aortic_aneurysm					0.549944	0.225477	0.155029	0.325842	0.117413
2.48	Childhood Kidney Cell Carcinoma	Nephrological diseases, Cancer diseases	17	2	MITF, MLH1	http://www.malacards.org/card/childhood_kidney_cell_carcinoma					0.54894	0.208323	0.153154	0.308504	0.0904104
2.65	Ventricular Tachycardia, Catecholaminergic Polymorphic, 1	Cardiovascular diseases, Rare diseases, Genetic diseases	5	1	CALM1	http://www.malacards.org/card/ventricular_tachycardia_catecholaminergic_polymorphic_1	Pathogenic	CALM1			0.547895	0.246553	0.112319	0.23176	0.149575
2.83	Congenital Heart Defects, Nonsyndromic, 2	Cardiovascular diseases, Genetic diseases	1	1	TAB2	http://www.malacards.org/card/congenital_heart_defects_nonsyndromic_2	Pathogenic, Causative mutation Ð Humsavar, Genetic Tests, Molecular basis known	TAB2			0.547654	0.366928	0.121032	0.246444	0.0126508
1.5	Mature Cataract	Eye diseases	7	1	NIN	http://www.malacards.org/card/mature_cataract					0.547612	0.29352	0.0700944	0.30721	0.0799514
1.43	Griscelli Syndrome, Type 2	Skin diseases, Eye diseases, Neuronal diseases, Immune diseases, Blood diseases, Rare diseases, Genetic diseases	6	1	AGFG1	http://www.malacards.org/card/griscelli_syndrome_type_2_2					0.547572	0.249693	0.113895	0.391514	0.090897
2.78	Osteoporosis	Bone diseases, Genetic diseases	117	4	CALCR, CTNNB1, NR3C1, TGFB2	http://www.malacards.org/card/osteoporosis					0.547111	0.301184	0.104794	0.214437	0.113389
2.14	Kearns-Sayre Syndrome	Endocrine diseases, Eye diseases, Neuronal diseases, Ear diseases, Cardiovascular diseases, Muscle diseases, Rare diseases, Fetal diseases, Genetic diseases, Metabolic diseases	22	1	RRM2B	http://www.malacards.org/card/kearns_sayre_syndrome	Causative germline mutation	RRM2B			0.546276	0.322303	0.270953	0.230528	0.205946
2.83	Joubert Syndrome with Jeune Asphyxiating Thoracic Dystrophy	Neuronal diseases, Bone diseases, Respiratory diseases, Rare diseases, Fetal diseases	2	1	KIAA0586	http://www.malacards.org/card/joubert_syndrome_with_jeune_asphyxiating_thoracic_dystrophy	Causative germline mutation	KIAA0586			0.545868	0.291494	0.0445429	0.418681	0.137559
2.83	Short-Rib Thoracic Dysplasia 14 with Polydactyly	Genetic diseases	1	1	KIAA0586	http://www.malacards.org/card/short_rib_thoracic_dysplasia_14_with_polydactyly	Pathogenic, Molecular basis known	KIAA0586			0.545868	0.291494	0.0445429	0.418681	0.137559
2.66	Nontuberculous Mycobacterial Lung Disease	Respiratory diseases, Rare diseases, Infectious diseases	12	2	IL12B, SLC11A1	http://www.malacards.org/card/nontuberculous_mycobacterial_lung_disease					0.545797	0.264166	0.0913665	0.300734	0.0590553
3.11	Adenocarcinoma	Cancer diseases	44	3	BCL2, CTNNB1, FLT1	http://www.malacards.org/card/adenocarcinoma					0.545708	0.224359	0.0524363	0.369444	0.0544798
1.46	Breast Adenoma	Cancer diseases	8	1	ING3	http://www.malacards.org/card/breast_adenoma					0.545262	0.336427	0.256273	0.200657	0.265543
2.35	Microvascular Complications of Diabetes 1	Eye diseases, Neuronal diseases, Nephrological diseases, Genetic diseases	21	2	FLT1, TGFB2	http://www.malacards.org/card/microvascular_complications_of_diabetes_1					0.544462	0.288293	0.16048	0.337294	0.105898
2.83	Lethal Congenital Contracture Syndrome 6	Respiratory diseases, Rare diseases, Fetal diseases, Genetic diseases	1	1	ZBTB42	http://www.malacards.org/card/lethal_congenital_contracture_syndrome_6	Pathogenic, Causative mutation Ð Humsavar	ZBTB42			0.544301	0.180164	0.153493	0.162202	0.0914426
2.58	Fanconi Anemia, Complementation Group B	Genetic diseases	9	1	FANCB	http://www.malacards.org/card/fanconi_anemia_complementation_group_b	Pathogenic, Molecular basis known	FANCB			0.544156	0.359687	0.0242149	0.142569	0.151819
3.75	Mismatch Repair Cancer Syndrome	Neuronal diseases, Gastrointestinal diseases, Blood diseases, Cancer diseases, Rare diseases, Genetic diseases	10	2	CTNNB1, MLH1	http://www.malacards.org/card/mismatch_repair_cancer_syndrome	Pathogenic, Causative mutation Ð Humsavar, Molecular basis known, Causative germline mutation	MLH1			0.543381	0.225231	0.100462	0.323855	0.0346133
1.67	Polymicrogyria	Neuronal diseases, Rare diseases, Fetal diseases, Genetic diseases	6	1	RTTN	http://www.malacards.org/card/polymicrogyria					0.542202	0.276523	0.289536	0.297126	0.176215
2.83	Lethal Fetal Cerebrorenogenitourinary Agenesis/hypoplasia Syndrome	Neuronal diseases, Nephrological diseases, Rare diseases, Fetal diseases	1	1	KIF14	http://www.malacards.org/card/lethal_fetal_cerebrorenogenitourinary_agenesis_hypoplasia_syndrome	Causative germline mutation	KIF14			0.541937	0.108387	0.101884	0.427589	0.217317
2.83	Meckel Syndrome 12	Endocrine diseases, Eye diseases, Neuronal diseases, Bone diseases, Immune diseases, Nephrological diseases, Rare diseases, Fetal diseases, Genetic diseases	1	1	KIF14	http://www.malacards.org/card/meckel_syndrome_12	Pathogenic	KIF14			0.541937	0.108387	0.101884	0.427589	0.217317
2.83	Charcot-Marie-Tooth Disease, X-Linked Dominant, 6	Eye diseases, Neuronal diseases, Ear diseases, Mental diseases, Muscle diseases, Rare diseases, Fetal diseases, Genetic diseases, Metabolic diseases	1	1	PDK3	http://www.malacards.org/card/charcot_marie_tooth_disease_x_linked_dominant_6	Pathogenic, Causative mutation Ð Humsavar	PDK3			0.541627	0.13649	0.345016	0.228566	0.131615
2.83	X-Linked Charcot-Marie-Tooth Disease Type 6	Eye diseases, Neuronal diseases, Ear diseases, Mental diseases, Muscle diseases, Rare diseases, Fetal diseases, Genetic diseases, Metabolic diseases	1	1	PDK3	http://www.malacards.org/card/x_linked_charcot_marie_tooth_disease_type_6	Causative germline mutation	PDK3			0.541627	0.13649	0.345016	0.228566	0.131615
1.36	Trichosporonosis	Infectious diseases	11	1	CA7	http://www.malacards.org/card/trichosporonosis					0.541443	0.384425	0.165682	0.263683	0.185174
2.02	Charcot-Marie-Tooth Disease, Type 1b	Neuronal diseases, Ear diseases, Muscle diseases, Rare diseases, Fetal diseases, Genetic diseases, Metabolic diseases	20	1	GDAP1	http://www.malacards.org/card/charcot_marie_tooth_disease_type_1b_2	Pathogenic	GDAP1			0.541339	0.265798	0.188927	0.246309	0.164567
2.83	Congenital Disorder of Glycosylation, Type Ip	Neuronal diseases, Gastrointestinal diseases, Liver diseases, Blood diseases, Muscle diseases, Rare diseases, Genetic diseases, Metabolic diseases	3	1	SRD5A3	http://www.malacards.org/card/congenital_disorder_of_glycosylation_type_ip	Molecular basis known	SRD5A3			0.540857	0.215261	0.27746	0.248794	0.141705
2.83	Congenital Disorder of Glycosylation, Type Iq	Neuronal diseases, Gastrointestinal diseases, Liver diseases, Blood diseases, Muscle diseases, Rare diseases, Genetic diseases, Metabolic diseases	1	1	SRD5A3	http://www.malacards.org/card/congenital_disorder_of_glycosylation_type_iq	Pathogenic, Molecular basis known	SRD5A3			0.540857	0.215261	0.27746	0.248794	0.141705
2.83	Kahrizi Syndrome	Neuronal diseases, Mental diseases, Genetic diseases	2	1	SRD5A3	http://www.malacards.org/card/kahrizi_syndrome	Pathogenic, Molecular basis known	SRD5A3			0.540857	0.215261	0.27746	0.248794	0.141705
2.32	Ciliopathy	Genetic diseases	24	2	AHI1, WDR19	http://www.malacards.org/card/ciliopathy					0.540492	0.284299	0.0717773	0.225926	0.0959373
2.04	Mitochondrial Complex Iv Deficiency	Cardiovascular diseases, Rare diseases, Genetic diseases, Metabolic diseases	21	1	APOPT1	http://www.malacards.org/card/mitochondrial_complex_iv_deficiency	Pathogenic, Molecular basis known	APOPT1			0.540436	0.33507	0.0238873	0.283729	0.0237251
2.84	Crohn's Colitis	Gastrointestinal diseases	9	2	DLG5, SLIT2	http://www.malacards.org/card/crohns_colitis					0.540044	0.208187	0.0538693	0.195226	0.109089
2.4	Breast Adenocarcinoma	Reproductive diseases, Cancer diseases, Rare diseases	20	2	BCL2, PLAU	http://www.malacards.org/card/breast_adenocarcinoma					0.539887	0.105386	0.132002	0.305576	0.0259146
1.5	Corneal Staphyloma	Eye diseases	7	1	B3GLCT	http://www.malacards.org/card/corneal_staphyloma					0.539724	0.344884	0.224525	0.316279	0.104707
1.5	Conjunctiva Squamous Cell Carcinoma	Skin diseases, Neuronal diseases, Gastrointestinal diseases, Cancer diseases, Rare diseases	1	1	SOX2	http://www.malacards.org/card/conjunctiva_squamous_cell_carcinoma					0.538361	0.398925	0.00742938	0.337014	0.0366085
1.5	Ovarian Embryonal Carcinoma	Reproductive diseases, Cancer diseases	5	1	SOX2	http://www.malacards.org/card/ovarian_embryonal_carcinoma					0.538361	0.398925	0.00742938	0.337014	0.0366085
1.5	Anophthalmia Plus Syndrome	Rare diseases, Fetal diseases, Genetic diseases	5	1	SOX2	http://www.malacards.org/card/anophthalmia_plus_syndrome					0.538361	0.398925	0.00742938	0.337014	0.0366085
1.5	Central Nervous System Teratoma	Neuronal diseases, Cancer diseases, Rare diseases	3	1	SOX2	http://www.malacards.org/card/central_nervous_system_teratoma					0.538361	0.398925	0.00742938	0.337014	0.0366085
2.55	Aneurysm		19	2	MYLK, TGFB2	http://www.malacards.org/card/aneurysm					0.537638	0.220432	0.15156	0.31855	0.114786
1.99	Roussy-Levy Syndrome	Neuronal diseases, Rare diseases, Genetic diseases	22	1	GDAP1	http://www.malacards.org/card/roussy_levy_syndrome	Pathogenic	GDAP1			0.537617	0.26397	0.187628	0.244616	0.163436
4.21	Childhood Type Dermatomyositis	Skin diseases, Neuronal diseases, Bone diseases, Respiratory diseases, Nephrological diseases, Muscle diseases, Rare diseases	302	8	BBX, BTG1, DCBLD2, NMI, PPM1K, SH3BGRL, TMCC3, TRABD	http://www.malacards.org/card/childhood_type_dermatomyositis			Skeletal Muscle	BBX, BTG1, DCBLD2, NMI, PPM1K, SH3BGRL, TMCC3, TRABD	0.537499	0.184631	0.0707953	0.255446	0.0901117
2.83	Niemann-Pick Disease Type C, Severe Perinatal Form	Eye diseases, Neuronal diseases, Respiratory diseases, Rare diseases, Metabolic diseases	2	1	NPC1	http://www.malacards.org/card/niemann_pick_disease_type_c_severe_perinatal_form	Causative germline mutation	NPC1			0.537285	0.146679	0.179453	0.345474	0.067698
2.83	Niemann-Pick Disease Type C, Severe Early Infantile Neurologic Onset	Eye diseases, Neuronal diseases, Respiratory diseases, Rare diseases, Metabolic diseases	2	1	NPC1	http://www.malacards.org/card/niemann_pick_disease_type_c_severe_early_infantile_neurologic_onset	Causative germline mutation	NPC1			0.537285	0.146679	0.179453	0.345474	0.067698
2.83	Niemann-Pick Disease Type C, Adult Neurologic Onset	Eye diseases, Neuronal diseases, Respiratory diseases, Rare diseases, Metabolic diseases	2	1	NPC1	http://www.malacards.org/card/niemann_pick_disease_type_c_adult_neurologic_onset	Causative germline mutation	NPC1			0.537285	0.146679	0.179453	0.345474	0.067698
2.83	Niemann-Pick Disease Type C, Juvenile Neurologic Onset	Eye diseases, Neuronal diseases, Respiratory diseases, Rare diseases, Metabolic diseases	2	1	NPC1	http://www.malacards.org/card/niemann_pick_disease_type_c_juvenile_neurologic_onset	Causative germline mutation	NPC1			0.537285	0.146679	0.179453	0.345474	0.067698
2.83	Niemann-Pick Disease Type C, Late Infantile Neurologic Onset	Eye diseases, Neuronal diseases, Respiratory diseases, Rare diseases, Metabolic diseases	2	1	NPC1	http://www.malacards.org/card/niemann_pick_disease_type_c_late_infantile_neurologic_onset	Causative germline mutation	NPC1			0.537285	0.146679	0.179453	0.345474	0.067698
5.08	Autosomal Recessive Non-Syndromic Sensorineural Deafness Type Dfnb	Neuronal diseases, Ear diseases, Rare diseases	62	3	EPS8, SERPINB6, SLC26A4	http://www.malacards.org/card/autosomal_recessive_non_syndromic_sensorineural_deafness_type_dfnb	Causative germline mutation	EPS8, SERPINB6, SLC26A4			0.537185	0.227766	0.100418	0.295989	0.0554375
1.33	Meningococcal Infection	Rare diseases, Infectious diseases	12	1	ADD1	http://www.malacards.org/card/meningococcal_infection					0.536842	0.331768	0.00177695	0.381158	0.0163737
1.5	Chromosome 8q21.11 Deletion Syndrome	Neuronal diseases, Rare diseases, Fetal diseases, Genetic diseases	2	1	ZFHX4	http://www.malacards.org/card/chromosome_8q2111_deletion_syndrome					0.536534	0.274706	0.0368599	0.285436	0.12072
1.98	Charcot-Marie-Tooth Hereditary Neuropathy	Neuronal diseases, Ear diseases, Mental diseases, Rare diseases, Genetic diseases	26	1	GDAP1	http://www.malacards.org/card/charcot_marie_tooth_hereditary_neuropathy	Pathogenic	GDAP1			0.536359	0.263352	0.187189	0.244043	0.163053
2.12	Nervous System Cancer	Neuronal diseases, Cancer diseases	40	2	CDKN1B, GNA11	http://www.malacards.org/card/nervous_system_cancer					0.536227	0.303504	0.0670284	0.187948	0.112071
1.5	Follicular Dendritic Cell Sarcoma	Immune diseases, Blood diseases, Cancer diseases, Rare diseases	7	1	PPP3CA	http://www.malacards.org/card/follicular_dendritic_cell_sarcoma					0.535866	0.251857	0.0447448	0.284009	0.144684
1.5	Alexia	Fetal diseases	5	1	PPP3CA	http://www.malacards.org/card/alexia					0.535866	0.251857	0.0447448	0.284009	0.144684
1.5	Benign Essential Hypertension	Cardiovascular diseases, Blood diseases, Rare diseases, Genetic diseases	5	1	PPP3CA	http://www.malacards.org/card/benign_essential_hypertension					0.535866	0.251857	0.0447448	0.284009	0.144684
1.5	Viral Esophagitis	Gastrointestinal diseases	7	1	PPP3CA	http://www.malacards.org/card/viral_esophagitis					0.535866	0.251857	0.0447448	0.284009	0.144684
4.49	Primary Ciliary Dyskinesia	Respiratory diseases, Rare diseases, Genetic diseases	60	3	CCDC40, DNAL1, RPGR	http://www.malacards.org/card/primary_ciliary_dyskinesia	Pathogenic	CCDC40, DNAL1			0.535588	0.221555	0.125506	0.222269	0.0766605
2.33	Dysostosis	Bone diseases	23	2	EVC, EVC2	http://www.malacards.org/card/dysostosis					0.535514	0.256511	0.092644	0.323986	0.0601115
1.83	Glucocorticoid Deficiency 3		3	1	FGD3	http://www.malacards.org/card/glucocorticoid_deficiency_3	Genetic linkage	FGD3			0.535324	0.235007	0.0690568	0.27248	0.117771
2.54	Reticulosarcoma	Immune diseases, Cancer diseases, Rare diseases	15	2	BCL2, CDKN1B	http://www.malacards.org/card/reticulosarcoma					0.534819	0.171784	0.0943955	0.27142	0.065649
1.48	Anophthalmia/microphthalmia	Genetic diseases	7	1	SOX2	http://www.malacards.org/card/anophthalmia_microphthalmia_2					0.53425	0.39588	0.00737266	0.334441	0.036329
2.5	Aortic Aneurysm	Cardiovascular diseases	21	2	MYLK, TGFB2	http://www.malacards.org/card/aortic_aneurysm					0.533734	0.218831	0.15046	0.316237	0.113952
2.15	Epilepsy Syndrome	Neuronal diseases, Rare diseases, Genetic diseases	37	2	ARX, KCNA1	http://www.malacards.org/card/epilepsy_syndrome					0.533716	0.280735	0.086462	0.261521	0.06039
2.84	Spindle Cell Hemangioma	Cardiovascular diseases, Cancer diseases, Rare diseases, Fetal diseases	9	2	GPR161, PROX1	http://www.malacards.org/card/spindle_cell_hemangioma					0.533095	0.293202	0.0191941	0.242025	0.130608
2.09	Takayasu's Arteritis	Bone diseases, Cardiovascular diseases, Nephrological diseases, Rare diseases	20	1	IL12B	http://www.malacards.org/card/takayasus_arteritis	Susceptibility factor	IL12B			0.532783	0.23549	0.134794	0.261063	0.0911058
2.27	Gastric Cancer	Gastrointestinal diseases, Cancer diseases, Rare diseases	35	2	CTNNB1, RUFY3	http://www.malacards.org/card/gastric_cancer					0.532543	0.300887	0.0404109	0.291035	0.0609762
1.47	Nut Midline Carcinoma	Cancer diseases, Rare diseases	7	1	SOX2	http://www.malacards.org/card/nut_midline_carcinoma					0.532174	0.394341	0.007344	0.333141	0.0361878
2.83	Left Ventricular Noncompaction 1, with or Without Congenital Heart Defects	Genetic diseases	1	1	DTNA	http://www.malacards.org/card/left_ventricular_noncompaction_1_with_or_without_congenital_heart_defects	Pathogenic, Causative mutation Ð Humsavar, Genetic Tests, Molecular basis known	DTNA			0.531137	0.144469	0.0157748	0.239011	0.16837
1.21	Mononeuritis of Lower Limb	Neuronal diseases	19	1	EIF2AK3	http://www.malacards.org/card/mononeuritis_of_lower_limb					0.531124	0.388252	0.0252815	0.361696	0.0135437
2.62	Intravascular Large B-Cell Lymphoma	Immune diseases, Blood diseases, Cancer diseases, Rare diseases	6	1	BCL2	http://www.malacards.org/card/intravascular_large_b_cell_lymphoma	modifying Somatic mutation	BCL2			0.530045	0.0224739	0.12138	0.35036	0.0283574
2.39	Moyamoya Disease	Neuronal diseases, Cardiovascular diseases, Rare diseases, Genetic diseases	19	2	GUCY1A3, SIX3	http://www.malacards.org/card/moyamoya_disease					0.529783	0.303036	0.119996	0.239197	0.119201
1.2	Lesion of Sciatic Nerve	Neuronal diseases	20	1	EIF2AK3	http://www.malacards.org/card/lesion_of_sciatic_nerve					0.528311	0.386196	0.0251476	0.35978	0.0134719
2.33	Mlh3-Related Lynch Syndrome	Gastrointestinal diseases, Cancer diseases, Rare diseases, Genetic diseases	1	1	MLH3	http://www.malacards.org/card/mlh3_related_lynch_syndrome	Genetic Tests	MLH3			0.528269	0.147915	0.366619	0.157424	0.258852
1.5	Israeli Tick Typhus	Infectious diseases	6	1	ATR	http://www.malacards.org/card/israeli_tick_typhus					0.528093	0.258238	0.0723488	0.376003	0.0702364
1.5	Bacillary Angiomatosis	Infectious diseases	6	1	ATR	http://www.malacards.org/card/bacillary_angiomatosis					0.528093	0.258238	0.0723488	0.376003	0.0702364
1.46	Hyperferritinemia-Cataract Syndrome	Eye diseases, Rare diseases, Genetic diseases	7	1	IREB2	http://www.malacards.org/card/hyperferritinemia_cataract_syndrome					0.527959	0.245501	0.210128	0.375379	0.0966166
1.46	Dendritic Cell Sarcoma	Immune diseases, Blood diseases, Cancer diseases, Rare diseases	8	1	PPP3CA	http://www.malacards.org/card/dendritic_cell_sarcoma					0.527626	0.247984	0.0440568	0.279642	0.142459
3.6	3p- Syndrome	Neuronal diseases, Rare diseases, Fetal diseases, Genetic diseases	11	2	CNTN4, DDX11	http://www.malacards.org/card/3p_syndrome	Role in phenotype	CNTN4			0.527206	0.246732	0.0365934	0.318169	0.092261
2.83	Severe Intellectual Disability-Progressive Spastic Diplegia Syndrome	Neuronal diseases, Rare diseases, Fetal diseases	1	1	CTNNB1	http://www.malacards.org/card/severe_intellectual_disability_progressive_spastic_diplegia_syndrome	Causative germline mutation	CTNNB1			0.527151	0.34054	0.000403798	0.348447	0.0268847
2.83	Mental Retardation, Autosomal Dominant 19	Neuronal diseases, Mental diseases, Genetic diseases	1	1	CTNNB1	http://www.malacards.org/card/mental_retardation_autosomal_dominant_19	Pathogenic, Causative mutation Ð Humsavar, Molecular basis known	CTNNB1			0.527151	0.34054	0.000403798	0.348447	0.0268847
2.4	Precursor B-Cell Acute Lymphoblastic Leukemia	Immune diseases, Blood diseases, Cancer diseases, Rare diseases	37	2	AFF1, FLT1	http://www.malacards.org/card/precursor_b_cell_acute_lymphoblastic_leukemia	Gene fusion	AFF1			0.526649	0.297294	0.0541132	0.355752	0.123763
2.72	Osteochondroma	Bone diseases, Cancer diseases, Rare diseases, Fetal diseases, Genetic diseases, Metabolic diseases	11	2	FGF9, TGFB2	http://www.malacards.org/card/osteochondroma					0.525312	0.231663	0.221156	0.205922	0.113467
2.4	Hemangioma	Cancer diseases, Genetic diseases	20	2	KRIT1, PROX1	http://www.malacards.org/card/hemangioma					0.524483	0.252539	0.0633314	0.170457	0.166261
3	Embryoma	Cancer diseases	6	2	CTNNB1, LIAS	http://www.malacards.org/card/embryoma					0.524373	0.297582	0.0746618	0.323538	0.0894056
2.04	Meckel Syndrome 1	Endocrine diseases, Eye diseases, Neuronal diseases, Bone diseases, Immune diseases, Nephrological diseases, Rare diseases, Fetal diseases, Genetic diseases	40	2	AHI1, C2CD3	http://www.malacards.org/card/meckel_syndrome_1					0.524037	0.270141	0.127341	0.269355	0.0841079
4.78	Chronic Lymphocytic Leukemia	Immune diseases, Blood diseases, Cancer diseases, Rare diseases, Genetic diseases	108	5	BCL2, BIRC3, BTG1, RCBTB1, SETDB2	http://www.malacards.org/card/chronic_lymphocytic_leukemia					0.523906	0.151032	0.106039	0.214917	0.077119
2.33	Fancb-Related Fanconi Anemia	Genetic diseases	1	1	FANCB	http://www.malacards.org/card/fancb_related_fanconi_anemia	Genetic Tests	FANCB			0.523479	0.346019	0.0232948	0.137151	0.146051
2.33	Vacterl with Hydrocephalus, Fancb-Related	Neuronal diseases, Rare diseases, Fetal diseases, Genetic diseases	1	1	FANCB	http://www.malacards.org/card/vacterl_with_hydrocephalus_fancb_related	Genetic Tests	FANCB			0.523479	0.346019	0.0232948	0.137151	0.146051
1.5	Acute Anterolateral Myocardial Infarction	Cardiovascular diseases	2	1	PIK3C2A	http://www.malacards.org/card/acute_anterolateral_myocardial_infarction					0.523235	0.23127	0.0361032	0.282547	0.108833
1.5	Anterior Compartment Syndrome	Cardiovascular diseases, Rare diseases	5	1	PIK3C2A	http://www.malacards.org/card/anterior_compartment_syndrome					0.523235	0.23127	0.0361032	0.282547	0.108833
1.5	Tricuspid Valve Prolapse	Cardiovascular diseases, Rare diseases, Fetal diseases	5	1	PIK3C2A	http://www.malacards.org/card/tricuspid_valve_prolapse					0.523235	0.23127	0.0361032	0.282547	0.108833
1.5	Creatine Phosphokinase, Elevated Serum	Genetic diseases	5	1	PIK3C2A	http://www.malacards.org/card/creatine_phosphokinase_elevated_serum					0.523235	0.23127	0.0361032	0.282547	0.108833
1.5	Status Asthmaticus	Respiratory diseases	7	1	PIK3C2A	http://www.malacards.org/card/status_asthmaticus					0.523235	0.23127	0.0361032	0.282547	0.108833
1.5	Vibrio Vulnificus Infection	Rare diseases	3	1	PIK3C2A	http://www.malacards.org/card/vibrio_vulnificus_infection					0.523235	0.23127	0.0361032	0.282547	0.108833
1.5	Posteroinferior Myocardial Infarction	Cardiovascular diseases	1	1	PIK3C2A	http://www.malacards.org/card/posteroinferior_myocardial_infarction					0.523235	0.23127	0.0361032	0.282547	0.108833
1.5	Tick Paralysis	Rare diseases, Infectious diseases	1	1	PIK3C2A	http://www.malacards.org/card/tick_paralysis					0.523235	0.23127	0.0361032	0.282547	0.108833
1.5	Trichostrongylosis	Infectious diseases	3	1	PIK3C2A	http://www.malacards.org/card/trichostrongylosis					0.523235	0.23127	0.0361032	0.282547	0.108833
1.5	Neuroleptic Malignant Syndrome	Neuronal diseases, Rare diseases	7	1	PIK3C2A	http://www.malacards.org/card/neuroleptic_malignant_syndrome					0.523235	0.23127	0.0361032	0.282547	0.108833
1.5	Interstitial Myocarditis	Cardiovascular diseases	7	1	PIK3C2A	http://www.malacards.org/card/interstitial_myocarditis					0.523235	0.23127	0.0361032	0.282547	0.108833
1.5	Trichostrongyloidiasis	Infectious diseases	7	1	PIK3C2A	http://www.malacards.org/card/trichostrongyloidiasis					0.523235	0.23127	0.0361032	0.282547	0.108833
1.5	Scleromyxedema	Skin diseases, Rare diseases	4	1	PIK3C2A	http://www.malacards.org/card/scleromyxedema					0.523235	0.23127	0.0361032	0.282547	0.108833
1.5	Autoimmune Hypoparathyroidism	Endocrine diseases, Rare diseases	3	1	PIK3C2A	http://www.malacards.org/card/autoimmune_hypoparathyroidism					0.523235	0.23127	0.0361032	0.282547	0.108833
1.61	Basal Ganglia Calcification	Neuronal diseases, Rare diseases	8	1	SLC20A2	http://www.malacards.org/card/basal_ganglia_calcification					0.523107	0.254753	0.0795123	0.435748	0.0275677
2.83	Proud Syndrome	Reproductive diseases, Rare diseases, Genetic diseases	1	1	ARX	http://www.malacards.org/card/proud_syndrome	Pathogenic, Causative mutation Ð Humsavar, Genetic Tests, Molecular basis known	ARX			0.523103	0.228073	0.0904968	0.310723	0.00748037
2.83	Epileptic Encephalopathy, Early Infantile, 2	Neuronal diseases, Mental diseases, Rare diseases, Genetic diseases	2	1	ARX	http://www.malacards.org/card/epileptic_encephalopathy_early_infantile_2	Molecular basis known	ARX			0.523103	0.228073	0.0904968	0.310723	0.00748037
2.83	Epileptic Encephalopathy, Early Infantile, 1	Neuronal diseases, Mental diseases, Rare diseases, Genetic diseases	1	1	ARX	http://www.malacards.org/card/epileptic_encephalopathy_early_infantile_1	Pathogenic, Causative mutation Ð Humsavar, Genetic Tests, Molecular basis known, Causative germline mutation	ARX			0.523103	0.228073	0.0904968	0.310723	0.00748037
2.83	X-Linked Lissencephaly with Abnormal Genitalia	Endocrine diseases, Neuronal diseases, Reproductive diseases, Rare diseases, Fetal diseases, Genetic diseases	1	1	ARX	http://www.malacards.org/card/x_linked_lissencephaly_with_abnormal_genitalia	Genetic Tests, Causative germline mutation	ARX			0.523103	0.228073	0.0904968	0.310723	0.00748037
2.83	Lissencephaly, X-Linked 2	Reproductive diseases, Rare diseases, Genetic diseases	1	1	ARX	http://www.malacards.org/card/lissencephaly_x_linked_2	Pathogenic, Causative mutation Ð Humsavar, Molecular basis known	ARX			0.523103	0.228073	0.0904968	0.310723	0.00748037
2.83	Microcephaly-Corpus Callosum Agenesis-Abnormal Genitalia Syndrome	Neuronal diseases, Reproductive diseases, Rare diseases, Fetal diseases	1	1	ARX	http://www.malacards.org/card/microcephaly_corpus_callosum_agenesis_abnormal_genitalia_syndrome	Causative germline mutation	ARX			0.523103	0.228073	0.0904968	0.310723	0.00748037
2.83	Spasticity-Intellectual Disability-X-Linked Epilepsy Syndrome	Neuronal diseases, Rare diseases	1	1	ARX	http://www.malacards.org/card/spasticity_intellectual_disability_x_linked_epilepsy_syndrome	Causative germline mutation	ARX			0.523103	0.228073	0.0904968	0.310723	0.00748037
2.83	Mental Retardation, X-Linked 29 and Others	Neuronal diseases, Mental diseases, Genetic diseases	1	1	ARX	http://www.malacards.org/card/mental_retardation_x_linked_29_and_others	Pathogenic, Causative mutation Ð Humsavar, Molecular basis known	ARX			0.523103	0.228073	0.0904968	0.310723	0.00748037
1.62	Prostate Cancer Susceptibility	Cancer diseases, Genetic diseases	41	1	BRCA2	http://www.malacards.org/card/prostate_cancer_susceptibility	Genetic Tests	BRCA2			0.52276	0.345022	0.0747547	0.34084	0.168852
2.83	Leukoencephalopathy, Cystic, Without Megalencephaly	Neuronal diseases, Rare diseases, Genetic diseases	1	1	RNASET2	http://www.malacards.org/card/leukoencephalopathy_cystic_without_megalencephaly	Pathogenic, Causative mutation Ð Humsavar, Genetic Tests, Molecular basis known, Causative germline mutation	RNASET2			0.522743	0.364352	0.0653429	0.266599	0.0273395
1.93	Osteosarcoma, Somatic	Bone diseases, Cancer diseases, Rare diseases, Genetic diseases	47	1	CDS1	http://www.malacards.org/card/osteosarcoma_somatic	Molecular basis known	CDS1			0.522605	0.181344	0.226288	0.208519	0.11236
1.71	Diabetes Mellitus, Insulin-Dependent	Endocrine diseases, Rare diseases, Genetic diseases, Metabolic diseases	160	2	CAT, IRS1	http://www.malacards.org/card/diabetes_mellitus_insulin_dependent					0.522454	0.240068	0.179202	0.174761	0.216818
1.5	Glucagonoma	Endocrine diseases, Gastrointestinal diseases, Cancer diseases, Rare diseases	6	1	MADD	http://www.malacards.org/card/glucagonoma					0.522255	0.27105	0.118552	0.1854	0.25486
2.36	Leishmaniasis	Skin diseases, Rare diseases, Infectious diseases	22	2	IL12B, SLC11A1	http://www.malacards.org/card/leishmaniasis					0.522085	0.252689	0.087397	0.287669	0.0564896
1.5	Mulibrey Nanism	Neuronal diseases, Liver diseases, Rare diseases, Fetal diseases, Genetic diseases	6	1	PEX1	http://www.malacards.org/card/mulibrey_nanism					0.522046	0.222914	0.184282	0.259979	0.199421
2.66	Central Nervous System Organ Benign Neoplasm	Neuronal diseases, Cancer diseases	12	2	CTNNB1, KIAA1549	http://www.malacards.org/card/central_nervous_system_organ_benign_neoplasm					0.521815	0.277344	0.041945	0.248645	0.0654877
1.42	Central Nervous System Germ Cell Tumor	Neuronal diseases, Cancer diseases	9	1	SOX2	http://www.malacards.org/card/central_nervous_system_germ_cell_tumor					0.521572	0.386485	0.0071977	0.326504	0.0354669
1.25	Shprintzen-Goldberg Syndrome	Neuronal diseases, Bone diseases, Rare diseases, Fetal diseases, Genetic diseases	14	1	KAT6B	http://www.malacards.org/card/shprintzen_goldberg_syndrome					0.521338	0.282565	0.064646	0.320102	0.135548
1.36	Megalencephalic Leukoencephalopathy with Subcortical Cysts	Neuronal diseases, Rare diseases, Genetic diseases	9	1	VTI1A	http://www.malacards.org/card/megalencephalic_leukoencephalopathy_with_subcortical_cysts					0.521327	0.18872	0.212701	0.336777	0.167867
2.07	Autosomal Dominant Non-Syndromic Intellectual Disability	Neuronal diseases, Mental diseases, Rare diseases, Fetal diseases	20	1	MBD5	http://www.malacards.org/card/autosomal_dominant_non_syndromic_intellectual_disability	Causative germline mutation	MBD5			0.520321	0.126958	0.0718044	0.241949	0.000118113
1.46	Bartonellosis	Infectious diseases	8	1	ATR	http://www.malacards.org/card/bartonellosis					0.519974	0.254267	0.0712364	0.370221	0.0691565
1.36	Chronic Tic Disorder	Mental diseases, Fetal diseases	11	1	DNAJC13	http://www.malacards.org/card/chronic_tic_disorder					0.519872	0.309844	0.135687	0.328039	0.126329
1.42	Pineal Gland Cancer	Endocrine diseases, Cancer diseases	9	1	ZFHX4	http://www.malacards.org/card/pineal_gland_cancer					0.519803	0.266139	0.0357105	0.276535	0.116956
1.17	Diabetes Mellitus, Transient Neonatal, 1	Endocrine diseases, Rare diseases, Fetal diseases, Genetic diseases, Metabolic diseases	18	1	EIF2AK3	http://www.malacards.org/card/diabetes_mellitus_transient_neonatal_1					0.519755	0.379941	0.0247403	0.353953	0.0132538
1.31	Choroideremia	Eye diseases, Rare diseases, Genetic diseases	11	1	AGFG1	http://www.malacards.org/card/choroideremia					0.519543	0.236912	0.108065	0.371474	0.0862442
2.83	Leber Congenital Amaurosis 7	Eye diseases, Neuronal diseases, Rare diseases, Genetic diseases	2	1	RPGR	http://www.malacards.org/card/leber_congenital_amaurosis_7	Molecular basis known	RPGR			0.519452	0.252973	0.122591	0.296607	0.114799
2.83	Retinitis Pigmentosa, X-Linked, and Sinorespiratory Infections, with or Without Deafness	Ear diseases, Genetic diseases	1	1	RPGR	http://www.malacards.org/card/retinitis_pigmentosa_x_linked_and_sinorespiratory_infections_with_or_without_deafness	Pathogenic, Causative mutation Ð Humsavar, Genetic Tests, Molecular basis known	RPGR			0.519452	0.252973	0.122591	0.296607	0.114799
2.83	Macular Degeneration, X-Linked Atrophic	Genetic diseases	1	1	RPGR	http://www.malacards.org/card/macular_degeneration_x_linked_atrophic	Pathogenic, Molecular basis known	RPGR			0.519452	0.252973	0.122591	0.296607	0.114799
2.83	Congenital Disorder of Glycosylation, Type Iij	Neuronal diseases, Gastrointestinal diseases, Liver diseases, Blood diseases, Muscle diseases, Rare diseases, Genetic diseases, Metabolic diseases	2	1	RPGR	http://www.malacards.org/card/congenital_disorder_of_glycosylation_type_iij	Molecular basis known	RPGR			0.519452	0.252973	0.122591	0.296607	0.114799
2.83	Retinitis Pigmentosa 3	Eye diseases, Rare diseases, Genetic diseases	5	1	RPGR	http://www.malacards.org/card/retinitis_pigmentosa_3	Pathogenic, Causative mutation Ð Humsavar, Molecular basis known	RPGR			0.519452	0.252973	0.122591	0.296607	0.114799
2.83	Cone-Rod Dystrophy, X-Linked, 1	Rare diseases, Genetic diseases	1	1	RPGR	http://www.malacards.org/card/cone_rod_dystrophy_x_linked_1_2	Pathogenic, Molecular basis known	RPGR			0.519452	0.252973	0.122591	0.296607	0.114799
2.83	Primary Ciliary Dyskinesia-Retinitis Pigmentosa Syndrome	Eye diseases, Respiratory diseases, Rare diseases	1	1	RPGR	http://www.malacards.org/card/primary_ciliary_dyskinesia_retinitis_pigmentosa_syndrome	Causative germline mutation	RPGR			0.519452	0.252973	0.122591	0.296607	0.114799
1.29	Juvenile Nasopharyngeal Angiofibroma	Cancer diseases, Rare diseases	14	1	BMI1	http://www.malacards.org/card/juvenile_nasopharyngeal_angiofibroma					0.519278	0.190575	0.142282	0.32351	0.153706
2.83	Arrhythmogenic Right Ventricular Dysplasia 11	Skin diseases, Cardiovascular diseases, Genetic diseases	2	1	DSC2	http://www.malacards.org/card/arrhythmogenic_right_ventricular_dysplasia_11	Causative mutation Ð Humsavar, Molecular basis known	DSC2			0.519164	0.347321	0.185861	0.148481	0.0747596
1.42	Histiocytic and Dendritic Cell Cancer	Immune diseases, Cancer diseases	9	1	PPP3CA	http://www.malacards.org/card/histiocytic_and_dendritic_cell_cancer					0.519155	0.244003	0.0433495	0.275152	0.140172
1.42	Erysipeloid	Skin diseases, Infectious diseases	9	1	PPP3CA	http://www.malacards.org/card/erysipeloid					0.519155	0.244003	0.0433495	0.275152	0.140172
2.29	Catecholaminergic Polymorphic Ventricular Tachycardia	Cardiovascular diseases, Rare diseases, Genetic diseases	14	1	CALM1	http://www.malacards.org/card/catecholaminergic_polymorphic_ventricular_tachycardia	Pathogenic, Causative germline mutation	CALM1			0.518466	0.23331	0.106286	0.219311	0.141541
2.77	Bullous Keratopathy	Eye diseases	10	2	AQP3, TGFB2	http://www.malacards.org/card/bullous_keratopathy					0.517638	0.206796	0.158371	0.144421	0.166938
1.67	Leigh-Like Syndrome	Rare diseases, Genetic diseases, Metabolic diseases	7	1	SERAC1	http://www.malacards.org/card/leigh_like_syndrome					0.517424	0.268543	0.107107	0.342535	0.126252
2.15	Primary Bacterial Infectious Disease	Infectious diseases	37	2	GNA11, SLC11A1	http://www.malacards.org/card/primary_bacterial_infectious_disease					0.516943	0.273463	0.0537104	0.247874	0.0701492
1.27	Dentin Sensitivity	Oral diseases	15	1	KCNK2	http://www.malacards.org/card/dentin_sensitivity					0.516559	0.350227	0.185961	0.31975	0.148769
1.5	Chromosome 19q13.11 Deletion Syndrome	Neuronal diseases, Rare diseases, Fetal diseases, Genetic diseases	3	1	UBA2	http://www.malacards.org/card/chromosome_19q1311_deletion_syndrome					0.516532	0.251551	0.0145145	0.380684	0.128616
1.83	Charcot-Marie-Tooth Disease Type 2h	Neuronal diseases, Ear diseases, Muscle diseases, Rare diseases, Fetal diseases, Genetic diseases, Metabolic diseases	1	1	GDAP1	http://www.malacards.org/card/charcot_marie_tooth_disease_type_2h	Candidate gene tested	GDAP1			0.516403	0.253554	0.180225	0.234963	0.156987
1.39	Autosomal Recessive Nonsyndromic Deafness	Neuronal diseases, Ear diseases, Cardiovascular diseases, Rare diseases, Genetic diseases	10	1	ABCG1	http://www.malacards.org/card/autosomal_recessive_nonsyndromic_deafness					0.516349	0.329431	0.0088812	0.238037	0.0464714
1.31	Mumps	Oral diseases, Rare diseases, Infectious diseases	13	1	IRF2	http://www.malacards.org/card/mumps					0.51619	0.30352	0.109432	0.366495	0.0094979
1.23	Monocytic Leukemia	Immune diseases, Cancer diseases	18	1	KAT6B	http://www.malacards.org/card/monocytic_leukemia					0.516059	0.279704	0.0639913	0.31686	0.134175
1.39	Orbital Cyst	Eye diseases	10	1	SOX2	http://www.malacards.org/card/orbital_cyst					0.515033	0.381639	0.00710745	0.322411	0.0350222
1.39	Venous Hemangioma	Cancer diseases	10	1	SOX2	http://www.malacards.org/card/venous_hemangioma					0.515033	0.381639	0.00710745	0.322411	0.0350222
1.94	Acute Myeloid Leukemia with T(8;21)(q22;q22) Translocation	Blood diseases, Cancer diseases, Rare diseases	5	1	RUNX1T1	http://www.malacards.org/card/acute_myeloid_leukemia_with_t821q22q22_translocation	Gene fusion	RUNX1T1			0.514895	0.249724	0.0133873	0.213681	0.0602427
2.43	Peripheral Osteosarcoma	Bone diseases, Cancer diseases	19	2	DACH1, TGFB2	http://www.malacards.org/card/peripheral_osteosarcoma					0.514638	0.233131	0.18141	0.273788	0.0952081
2.21	Cutaneous Leishmaniasis	Infectious diseases	413	5	CTDSPL, GSTO2, SLC11A1, TACC2, TPD52L1	http://www.malacards.org/card/cutaneous_leishmaniasis			Skin	CTDSPL, GSTO2, SLC11A1, TACC2, TPD52L1	0.514292	0.264963	0.0642403	0.306621	0.0586293
1.46	Hyperproinsulinemia	Genetic diseases	7	1	PCSK2	http://www.malacards.org/card/hyperproinsulinemia					0.514291	0.31526	0.00792008	0.339432	0.0507091
3	Adenomyoma	Cancer diseases	7	2	CTNNB1, MLH1	http://www.malacards.org/card/adenomyoma					0.513634	0.212901	0.0949622	0.306126	0.0327185
3	Atypical Polypoid Adenomyoma	Cancer diseases	6	2	CTNNB1, MLH1	http://www.malacards.org/card/atypical_polypoid_adenomyoma					0.513634	0.212901	0.0949622	0.306126	0.0327185
2.48	Niemann-Pick Disease, Type C1	Eye diseases, Neuronal diseases, Immune diseases, Respiratory diseases, Rare diseases, Genetic diseases, Metabolic diseases	12	1	NPC1	http://www.malacards.org/card/niemann_pick_disease_type_c1_2	Causative mutation Ð Humsavar, Genetic Tests, Molecular basis known	NPC1			0.513145	0.140088	0.17139	0.329952	0.0646562
2.28	Vaccinia	Skin diseases, Infectious diseases	35	2	IL12B, VRK2	http://www.malacards.org/card/vaccinia					0.51302	0.142363	0.149545	0.227011	0.127999
1.38	Lambert-Eaton Myasthenic Syndrome	Neuronal diseases, Rare diseases	10	1	SOX2	http://www.malacards.org/card/lambert_eaton_myasthenic_syndrome					0.512823	0.380002	0.00707695	0.321027	0.0348719
2.09	Chromophobe Renal Cell Carcinoma	Nephrological diseases, Cancer diseases, Rare diseases	332	4	FLRT3, IL12B, NRIP3, SLIT2	http://www.malacards.org/card/chromophobe_renal_cell_carcinoma			Kidney	FLRT3, IL12B, NRIP3, SLIT2	0.512807	0.265762	0.0700331	0.229994	0.109356
4.23	Hailey-Hailey Disease	Skin diseases, Rare diseases, Genetic diseases	7	2	ATP2C1, DSC2	http://www.malacards.org/card/hailey_hailey_disease	Pathogenic, Causative mutation Ð Humsavar, Genetic Tests, Molecular basis known, Causative germline mutation	ATP2C1			0.512713	0.292246	0.0993894	0.228157	0.0611667
1.39	Decubitus Ulcer	Skin diseases	10	1	PPP3CA	http://www.malacards.org/card/decubitus_ulcer					0.512646	0.240944	0.0428059	0.271702	0.138414
1.23	Meninges Hemangiopericytoma	Neuronal diseases, Cancer diseases	18	1	NCOA2	http://www.malacards.org/card/meninges_hemangiopericytoma					0.512606	0.283471	0.126101	0.268093	0.150194
3.36	Emery-Dreifuss Muscular Dystrophy, Dominant Type	Neuronal diseases, Cardiovascular diseases, Muscle diseases, Rare diseases, Genetic diseases	257	6	BTG1, EPS8, HINT3, LPIN1, MYLK, SH3BGRL	http://www.malacards.org/card/emery_dreifuss_muscular_dystrophy_dominant_type			Skeletal Muscle	BTG1, EPS8, HINT3, LPIN1, MYLK, SH3BGRL	0.512376	0.188298	0.0897341	0.205633	0.0935769
2.83	Spastic Paraplegia 49, Autosomal Recessive	Eye diseases, Neuronal diseases, Bone diseases, Mental diseases, Gastrointestinal diseases, Rare diseases, Genetic diseases, Metabolic diseases	1	1	TECPR2	http://www.malacards.org/card/spastic_paraplegia_49_autosomal_recessive	Pathogenic, Molecular basis known, Causative germline mutation	TECPR2			0.512253	0.137796	0.335526	0.166995	0.129088
3.29	B-Cell Lymphomas	Immune diseases, Blood diseases, Cancer diseases, Rare diseases, Genetic diseases	32	3	BCL2, BIRC3, CDKN1B	http://www.malacards.org/card/b_cell_lymphomas					0.508583	0.128231	0.146981	0.182598	0.0950203
1.36	Congenital Aphakia	Eye diseases, Rare diseases, Fetal diseases, Genetic diseases	11	1	SOX2	http://www.malacards.org/card/congenital_aphakia					0.508356	0.376692	0.00701531	0.318231	0.0345682
1.61	3-Methylglutaconic Aciduria	Eye diseases, Cardiovascular diseases, Rare diseases, Genetic diseases, Metabolic diseases	7	1	SERAC1	http://www.malacards.org/card/3_methylglutaconic_aciduria					0.507355	0.263317	0.105023	0.335869	0.123795
2.32	Choriocarcinoma	Cancer diseases, Rare diseases, Fetal diseases	24	2	ERV3-1, MGAT4A	http://www.malacards.org/card/choriocarcinoma					0.50718	0.15824	0.145561	0.229245	0.124437
1.42	Fiedler's Myocarditis	Cardiovascular diseases	9	1	PIK3C2A	http://www.malacards.org/card/fiedlers_myocarditis					0.506918	0.224058	0.0349773	0.273736	0.105439
1.42	Anteroseptal Myocardial Infarction	Cardiovascular diseases	9	1	PIK3C2A	http://www.malacards.org/card/anteroseptal_myocardial_infarction					0.506918	0.224058	0.0349773	0.273736	0.105439
1.36	Septic Arthritis	Bone diseases, Rare diseases	11	1	PPP3CA	http://www.malacards.org/card/septic_arthritis					0.506	0.23782	0.042251	0.26818	0.13662
1.36	Muscle Hypertrophy	Rare diseases, Genetic diseases	10	1	PPP3CA	http://www.malacards.org/card/muscle_hypertrophy					0.506	0.23782	0.042251	0.26818	0.13662
1.42	Diastolic Heart Failure	Cardiovascular diseases	9	1	MADD	http://www.malacards.org/card/diastolic_heart_failure					0.505969	0.262598	0.114855	0.179619	0.246913
1.5	Chronic Inflammation of Lacrimal Passage	Eye diseases	7	1	IFT122	http://www.malacards.org/card/chronic_inflammation_of_lacrimal_passage					0.505735	0.325187	0.125422	0.27158	0.115813
1.5	Internal Hordeolum	Skin diseases, Eye diseases	1	1	IFT122	http://www.malacards.org/card/internal_hordeolum					0.505735	0.325187	0.125422	0.27158	0.115813
1.5	Hordeolum	Skin diseases, Eye diseases	7	1	IFT122	http://www.malacards.org/card/hordeolum					0.505735	0.325187	0.125422	0.27158	0.115813
1.5	Chronic Dacryocystitis	Eye diseases	7	1	IFT122	http://www.malacards.org/card/chronic_dacryocystitis					0.505735	0.325187	0.125422	0.27158	0.115813
1.42	Uremic Neuropathy	Neuronal diseases, Nephrological diseases	9	1	PNRC1	http://www.malacards.org/card/uremic_neuropathy					0.505719	0.157784	0.114798	0.253365	0.0809151
2.83	Deafness, Autosomal Recessive 91	Neuronal diseases, Ear diseases, Cardiovascular diseases, Rare diseases, Genetic diseases	1	1	SERPINB6	http://www.malacards.org/card/deafness_autosomal_recessive_91	Pathogenic	SERPINB6			0.505246	0.275864	0.162689	0.280411	0.0525455
2.33	Kif14-Related Meckel Syndrome	Endocrine diseases, Eye diseases, Neuronal diseases, Bone diseases, Immune diseases, Nephrological diseases, Rare diseases, Fetal diseases, Genetic diseases	1	1	KIF14	http://www.malacards.org/card/kif14_related_meckel_syndrome	Genetic Tests	KIF14			0.505202	0.10104	0.094978	0.398605	0.202586
1.34	Sitosterolemia	Endocrine diseases, Rare diseases, Genetic diseases, Metabolic diseases	10	1	ABCG1	http://www.malacards.org/card/sitosterolemia					0.505114	0.322263	0.00868797	0.232858	0.0454603
2.33	Charcot-Marie-Tooth Neuropathy X Type 6	Neuronal diseases, Ear diseases, Mental diseases, Rare diseases, Genetic diseases	1	1	PDK3	http://www.malacards.org/card/charcot_marie_tooth_neuropathy_x_type_6	Genetic Tests	PDK3			0.504913	0.127238	0.321629	0.213073	0.122694
2.15	Long Qt Syndrome 1	Rare diseases, Genetic diseases	14	1	CALM1	http://www.malacards.org/card/long_qt_syndrome_1	Causative germline mutation	CALM1			0.504886	0.227199	0.103502	0.213567	0.137834
2.1	Lymphoblastic Leukemia	Immune diseases, Cancer diseases, Rare diseases, Genetic diseases	41	2	AFF1, SLX4IP	http://www.malacards.org/card/lymphoblastic_leukemia					0.504284	0.209782	0.104891	0.329045	0.103882
2.38	Breast Ductal Carcinoma	Cancer diseases	21	2	BCL2, CTNNB1	http://www.malacards.org/card/breast_ductal_carcinoma					0.503491	0.173302	0.0578426	0.332808	0.0263074
2.48	Colorectal Adenomatous Polyposis, Autosomal Recessive, with Pilomatricomas	Skin diseases, Cancer diseases, Rare diseases, Genetic diseases	11	1	CTNNB1	http://www.malacards.org/card/colorectal_adenomatous_polyposis_autosomal_recessive_with_pilomatricomas	Causative somatic mutation, Causative mutation Ð Humsavar, Molecular basis known	CTNNB1			0.503466	0.325239	0.000385655	0.332791	0.0256768
1.29	Tic Disorder	Fetal diseases	14	1	DNAJC13	http://www.malacards.org/card/tic_disorder					0.503377	0.300012	0.131381	0.317631	0.122321
2.83	Pyruvate Dehydrogenase Lipoic Acid Synthetase Deficiency	Genetic diseases	1	1	LIAS	http://www.malacards.org/card/pyruvate_dehydrogenase_lipoic_acid_synthetase_deficiency	Pathogenic, Causative mutation Ð Humsavar, Genetic Tests, Molecular basis known	LIAS			0.502858	0.245898	0.142812	0.288138	0.145829
2.83	Lipoic Acid Synthetase Deficiency	Rare diseases, Metabolic diseases	1	1	LIAS	http://www.malacards.org/card/lipoic_acid_synthetase_deficiency	Causative germline mutation	LIAS			0.502858	0.245898	0.142812	0.288138	0.145829
1.53	Episodic Ataxia	Neuronal diseases, Rare diseases, Genetic diseases	10	1	KCNA1	http://www.malacards.org/card/episodic_ataxia					0.502831	0.309744	0.0759275	0.194093	0.1066
1.5	Mutism	Fetal diseases	7	1	MITF	http://www.malacards.org/card/mutism					0.502316	0.289334	0.0949377	0.297873	0.127086
1.5	Waardenburg Syndrome, Type 1	Skin diseases, Eye diseases, Ear diseases, Rare diseases, Fetal diseases, Genetic diseases	4	1	MITF	http://www.malacards.org/card/waardenburg_syndrome_type_1					0.502316	0.289334	0.0949377	0.297873	0.127086
1.5	Gallbladder Melanoma	Skin diseases, Gastrointestinal diseases, Cancer diseases	4	1	MITF	http://www.malacards.org/card/gallbladder_melanoma					0.502316	0.289334	0.0949377	0.297873	0.127086
1.5	Cutaneous Ganglioneuroma	Skin diseases, Cancer diseases	6	1	MITF	http://www.malacards.org/card/cutaneous_ganglioneuroma					0.502316	0.289334	0.0949377	0.297873	0.127086
1.5	Skin Sarcoma	Skin diseases, Cancer diseases	5	1	MITF	http://www.malacards.org/card/skin_sarcoma					0.502316	0.289334	0.0949377	0.297873	0.127086
1.5	Malignant Leptomeningeal Tumor	Neuronal diseases, Cancer diseases	1	1	MITF	http://www.malacards.org/card/malignant_leptomeningeal_tumor					0.502316	0.289334	0.0949377	0.297873	0.127086
1.5	Meningeal Melanoma	Skin diseases, Neuronal diseases, Cancer diseases	1	1	MITF	http://www.malacards.org/card/meningeal_melanoma					0.502316	0.289334	0.0949377	0.297873	0.127086
1.5	Waardenburg Syndrome, Type 4a	Skin diseases, Eye diseases, Ear diseases, Rare diseases, Fetal diseases, Genetic diseases	5	1	MITF	http://www.malacards.org/card/waardenburg_syndrome_type_4a					0.502316	0.289334	0.0949377	0.297873	0.127086
2.12	Artery Disease	Cardiovascular diseases	55	2	ADAMTS7, MEF2A	http://www.malacards.org/card/artery_disease					0.502213	0.285257	0.0813585	0.202894	0.0625255
1.24	Progressive Bulbar Palsy	Neuronal diseases, Rare diseases	17	1	AGFG1	http://www.malacards.org/card/progressive_bulbar_palsy					0.502084	0.22895	0.104433	0.35899	0.0833459
1.5	Xeroderma Pigmentosum, Group B	Skin diseases, Eye diseases, Neuronal diseases, Ear diseases, Cancer diseases, Rare diseases, Fetal diseases, Genetic diseases	6	1	MCF2	http://www.malacards.org/card/xeroderma_pigmentosum_group_b					0.501942	0.168151	0.0898476	0.247959	0.164135
1.33	Non-Functioning Pancreatic Endocrine Tumor	Endocrine diseases, Cancer diseases, Rare diseases	12	1	SOX2	http://www.malacards.org/card/non_functioning_pancreatic_endocrine_tumor					0.501539	0.37164	0.00692123	0.313963	0.0341046
1.27	Pneumatosis Cystoides Intestinalis	Gastrointestinal diseases	15	1	ING3	http://www.malacards.org/card/pneumatosis_cystoides_intestinalis					0.50143	0.309383	0.235672	0.184526	0.244197
2.77	Interstitial Emphysema	Respiratory diseases	10	2	FLT1, PROX1	http://www.malacards.org/card/interstitial_emphysema					0.501205	0.245591	0.0310747	0.234815	0.143595
1.5	Breast-Ovarian Cancer, Familial, 2	Reproductive diseases, Cancer diseases, Rare diseases, Genetic diseases	1	1	BRCA2	http://www.malacards.org/card/breast_ovarian_cancer_familial_2					0.500896	0.330591	0.0716281	0.326584	0.161789
1.5	Familial Colorectal Cancer Type X	Gastrointestinal diseases, Cancer diseases, Rare diseases, Genetic diseases	5	1	BRCA2	http://www.malacards.org/card/familial_colorectal_cancer_type_x					0.500896	0.330591	0.0716281	0.326584	0.161789
1.5	Tuberculous Salpingitis	Reproductive diseases, Infectious diseases	4	1	BRCA2	http://www.malacards.org/card/tuberculous_salpingitis					0.500896	0.330591	0.0716281	0.326584	0.161789
1.5	Cancerophobia	Mental diseases, Cancer diseases	4	1	BRCA2	http://www.malacards.org/card/cancerophobia					0.500896	0.330591	0.0716281	0.326584	0.161789
1.5	Retinoblastoma Fa - Friedreich Ataxia	Eye diseases, Cancer diseases	3	1	BRCA2	http://www.malacards.org/card/retinoblastoma_fa_friedreich_ataxia					0.500896	0.330591	0.0716281	0.326584	0.161789
1.5	Nosophobia	Mental diseases	4	1	BRCA2	http://www.malacards.org/card/nosophobia					0.500896	0.330591	0.0716281	0.326584	0.161789
1.5	Breast Reconstruction		3	1	BRCA2	http://www.malacards.org/card/breast_reconstruction					0.500896	0.330591	0.0716281	0.326584	0.161789
1.5	Uterine Corpus Serous Adenocarcinoma	Cancer diseases	6	1	BRCA2	http://www.malacards.org/card/uterine_corpus_serous_adenocarcinoma					0.500896	0.330591	0.0716281	0.326584	0.161789
1.5	Premature Menopause	Reproductive diseases	7	1	BRCA2	http://www.malacards.org/card/premature_menopause					0.500896	0.330591	0.0716281	0.326584	0.161789
1.5	Acute Biphenotypic Leukemia	Blood diseases, Cancer diseases, Rare diseases	3	1	MLLT10	http://www.malacards.org/card/acute_biphenotypic_leukemia					0.50071	0.16924	0.158725	0.262372	0.168739
3.58	Non-Syndromic X-Linked Intellectual Disability	Neuronal diseases, Mental diseases, Rare diseases, Fetal diseases	56	2	ARX, NLGN4X	http://www.malacards.org/card/non_syndromic_x_linked_intellectual_disability	Pathogenic, Causative germline mutation	ARX, NLGN4X			0.500338	0.180622	0.0433893	0.195382	0.0753758
1.5	Hereditary Retinal Dystrophy	Eye diseases, Rare diseases, Metabolic diseases	5	1	LCA5	http://www.malacards.org/card/hereditary_retinal_dystrophy					0.500314	0.354223	0.078049	0.296186	0.0362728
3.8	Ciliary Dyskinesia, Primary, 1, with or Without Situs Inversus	Genetic diseases	29	2	CCDC40, DNAL1	http://www.malacards.org/card/ciliary_dyskinesia_primary_1_with_or_without_situs_inversus	Pathogenic	CCDC40, DNAL1			0.499904	0.188464	0.116728	0.168468	0.05209
2.83	Ciliary Dyskinesia, Primary, 16	Respiratory diseases, Rare diseases, Genetic diseases	1	1	DNAL1	http://www.malacards.org/card/ciliary_dyskinesia_primary_16	Pathogenic, Causative mutation Ð Humsavar, Molecular basis known	DNAL1			0.499721	0.163909	0.0794556	0.227873	0.00469738
1.31	Taeniasis	Infectious diseases	13	1	ANXA11	http://www.malacards.org/card/taeniasis					0.499444	0.291675	0.21576	0.262208	0.102386
1.31	Cysticercosis	Neuronal diseases, Gastrointestinal diseases, Rare diseases, Infectious diseases	13	1	ANXA11	http://www.malacards.org/card/cysticercosis					0.499444	0.291675	0.21576	0.262208	0.102386
1.49	Precursor T-Cell Acute Lymphoblastic Leukemia	Immune diseases, Blood diseases, Cancer diseases, Rare diseases	21	1	MLLT10	http://www.malacards.org/card/precursor_t_cell_acute_lymphoblastic_leukemia	Gene fusion	MLLT10			0.498805	0.168596	0.158121	0.261374	0.168097
2.2	Oral Squamous Cell Carcinoma	Oral diseases, Cancer diseases, Rare diseases	32	2	CDKN1B, CTNNB1	http://www.malacards.org/card/oral_squamous_cell_carcinoma					0.497639	0.310029	0.0310442	0.252552	0.0604631
1.5	Spinocerebellar Ataxia 6	Skin diseases, Eye diseases, Neuronal diseases, Ear diseases, Mental diseases, Rare diseases, Genetic diseases, Metabolic diseases	5	1	KCNA1	http://www.malacards.org/card/spinocerebellar_ataxia_6					0.497235	0.306297	0.0750825	0.191933	0.105414
1.5	Episodic Ataxia, Type 2	Neuronal diseases, Rare diseases, Genetic diseases	5	1	KCNA1	http://www.malacards.org/card/episodic_ataxia_type_2_2					0.497235	0.306297	0.0750825	0.191933	0.105414
1.5	Convulsions Benign Familial Neonatal Dominant Form	Rare diseases, Genetic diseases	7	1	KCNA1	http://www.malacards.org/card/convulsions_benign_familial_neonatal_dominant_form					0.497235	0.306297	0.0750825	0.191933	0.105414
1.5	Episodic Ataxia, Type 7	Neuronal diseases, Rare diseases, Genetic diseases	2	1	KCNA1	http://www.malacards.org/card/episodic_ataxia_type_7					0.497235	0.306297	0.0750825	0.191933	0.105414
1.5	Paramyotonia Congenita	Neuronal diseases, Rare diseases, Genetic diseases	4	1	KCNA1	http://www.malacards.org/card/paramyotonia_congenita					0.497235	0.306297	0.0750825	0.191933	0.105414
1.57	Facioscapulohumeral Muscular Dystrophy 1	Neuronal diseases, Muscle diseases, Rare diseases, Genetic diseases	134	2	SH3BGRL, ZNF827	http://www.malacards.org/card/facioscapulohumeral_muscular_dystrophy_1			Skeletal Muscle	SH3BGRL, ZNF827	0.497182	0.27345	0.0438266	0.293835	0.0111369
2.58	Leukomalacia	Rare diseases	14	2	CHKA, GRM1	http://www.malacards.org/card/leukomalacia					0.497099	0.143661	0.0354928	0.144159	0.042999
2.3	Basal Cell Carcinoma	Skin diseases, Respiratory diseases, Cancer diseases, Rare diseases, Genetic diseases	25	2	BCL2, CTNNB1	http://www.malacards.org/card/basal_cell_carcinoma					0.496665	0.170952	0.0570583	0.328295	0.0259507
2.83	Autosomal Recessive Congenital Cerebellar Ataxia Due to Mglur1 Deficiency	Neuronal diseases, Rare diseases, Metabolic diseases	1	1	GRM1	http://www.malacards.org/card/autosomal_recessive_congenital_cerebellar_ataxia_due_to_mglur1_deficiency	Causative germline mutation	GRM1			0.496621	0.109257	0.029251	0.189213	0.0551249
2.83	Spinocerebellar Ataxia, Autosomal Recessive 13	Skin diseases, Eye diseases, Neuronal diseases, Ear diseases, Mental diseases, Rare diseases, Genetic diseases, Metabolic diseases	1	1	GRM1	http://www.malacards.org/card/spinocerebellar_ataxia_autosomal_recessive_13	Pathogenic, Genetic Tests, Molecular basis known	GRM1			0.496621	0.109257	0.029251	0.189213	0.0551249
2.83	Maple Syrup Urine Disease, Mild Variant	Nephrological diseases, Genetic diseases	1	1	PPM1K	http://www.malacards.org/card/maple_syrup_urine_disease_mild_variant	Pathogenic, Genetic Tests	PPM1K			0.496573	0.152944	0.0108253	0.366967	0.115702
1.5	Abdominal Tuberculosis	Immune diseases, Gastrointestinal diseases, Infectious diseases	7	1	TBP	http://www.malacards.org/card/abdominal_tuberculosis					0.496114	0.167686	0.162229	0.314536	0.0912849
1.5	Gastrointestinal Tuberculosis	Endocrine diseases, Gastrointestinal diseases, Infectious diseases	6	1	TBP	http://www.malacards.org/card/gastrointestinal_tuberculosis					0.496114	0.167686	0.162229	0.314536	0.0912849
2.23	Stomach Cancer	Gastrointestinal diseases, Cancer diseases, Rare diseases, Genetic diseases	30	2	MLH1, PLAU	http://www.malacards.org/card/stomach_cancer					0.495616	0.131586	0.155871	0.248303	0.0294644
2.51	Amyotrophic Lateral Sclerosis 9	Neuronal diseases, Mental diseases, Rare diseases, Genetic diseases	15	2	ALS2, VTA1	http://www.malacards.org/card/amyotrophic_lateral_sclerosis_9					0.495513	0.236855	0.242306	0.114216	0.19325
1.29	Papillary Hidradenoma	Skin diseases, Cancer diseases	14	1	ANXA11	http://www.malacards.org/card/papillary_hidradenoma					0.494731	0.288923	0.213724	0.259734	0.10142
1.46	Pycnodysostosis	Bone diseases, Rare diseases, Fetal diseases, Genetic diseases, Metabolic diseases	7	1	MITF	http://www.malacards.org/card/pycnodysostosis					0.494592	0.284885	0.0934779	0.293293	0.125132
1.46	Epithelioid Cell Melanoma	Skin diseases, Cancer diseases	8	1	MITF	http://www.malacards.org/card/epithelioid_cell_melanoma					0.494592	0.284885	0.0934779	0.293293	0.125132
1.5	Sphenoid Sinusitis	Respiratory diseases	7	1	SLC25A16	http://www.malacards.org/card/sphenoid_sinusitis					0.494365	0.293158	0.150781	0.380167	0.00395986
1.21	Testis Seminoma	Reproductive diseases, Cancer diseases	19	1	AGFG1	http://www.malacards.org/card/testis_seminoma					0.494338	0.225418	0.102822	0.353452	0.0820601
2.79	Intermediate Maple Syrup Urine Disease	Nephrological diseases, Rare diseases, Genetic diseases, Metabolic diseases	4	1	PPM1K	http://www.malacards.org/card/intermediate_maple_syrup_urine_disease	Causative germline mutation	PPM1K			0.494288	0.152241	0.0107755	0.365279	0.115169
1.46	Gingival Recession	Oral diseases, Gastrointestinal diseases	8	1	MCF2	http://www.malacards.org/card/gingival_recession					0.494224	0.165565	0.0884661	0.244147	0.161611
1.34	Nijmegen Breakage Syndrome	Immune diseases, Blood diseases, Cancer diseases, Rare diseases, Fetal diseases, Genetic diseases	11	1	ATR	http://www.malacards.org/card/nijmegen_breakage_syndrome					0.494218	0.241673	0.0677079	0.351883	0.065731
1.36	Chromosome Xp21 Deletion Syndrome	Rare diseases, Fetal diseases, Genetic diseases, Metabolic diseases	10	1	PIK3C2A	http://www.malacards.org/card/chromosome_xp21_deletion_syndrome					0.494073	0.21838	0.034091	0.266799	0.102767
1.36	Granulomatous Myositis	Muscle diseases	11	1	PIK3C2A	http://www.malacards.org/card/granulomatous_myositis					0.494073	0.21838	0.034091	0.266799	0.102767
2.43	Chronic Closed-Angle Glaucoma	Eye diseases	19	2	AQP3, TGFB2	http://www.malacards.org/card/chronic_closed_angle_glaucoma					0.494006	0.197355	0.151141	0.137828	0.159317
1.5	Congenital Rubella	Skin diseases, Neuronal diseases, Rare diseases, Fetal diseases, Infectious diseases	4	1	CAT	http://www.malacards.org/card/congenital_rubella					0.493747	0.298717	0.185155	0.130349	0.211817
1.5	Urogenital Tuberculosis	Reproductive diseases, Infectious diseases	5	1	CAT	http://www.malacards.org/card/urogenital_tuberculosis					0.493747	0.298717	0.185155	0.130349	0.211817
1.5	Social Phobia	Mental diseases	7	1	CAT	http://www.malacards.org/card/social_phobia					0.493747	0.298717	0.185155	0.130349	0.211817
1.5	Toxic Optic Neuropathy	Eye diseases, Neuronal diseases	5	1	CAT	http://www.malacards.org/card/toxic_optic_neuropathy					0.493747	0.298717	0.185155	0.130349	0.211817
1.5	Pityriasis Versicolor	Infectious diseases	7	1	CAT	http://www.malacards.org/card/pityriasis_versicolor					0.493747	0.298717	0.185155	0.130349	0.211817
1.5	Myeloperoxidase Deficiency	Blood diseases, Rare diseases, Genetic diseases	2	1	CAT	http://www.malacards.org/card/myeloperoxidase_deficiency					0.493747	0.298717	0.185155	0.130349	0.211817
1.5	Hypermethioninemia	Metabolic diseases	6	1	CAT	http://www.malacards.org/card/hypermethioninemia					0.493747	0.298717	0.185155	0.130349	0.211817
1.5	Megakaryocytic Tumor	Immune diseases, Blood diseases, Cancer diseases	6	1	CAT	http://www.malacards.org/card/megakaryocytic_tumor					0.493747	0.298717	0.185155	0.130349	0.211817
1.5	Meningitis and Encephalitis		2	1	CAT	http://www.malacards.org/card/meningitis_and_encephalitis					0.493747	0.298717	0.185155	0.130349	0.211817
1.16	Chondrosarcoma	Bone diseases, Cancer diseases, Rare diseases, Genetic diseases	23	1	NCOA2	http://www.malacards.org/card/chondrosarcoma					0.493668	0.272998	0.121442	0.258188	0.144645
1.33	Postencephalitic Parkinson Disease	Neuronal diseases, Rare diseases	12	1	XRCC6	http://www.malacards.org/card/postencephalitic_parkinson_disease					0.493376	0.262476	0.158867	0.261489	0.053778
1.46	Dysplastic Nevus Syndrome	Skin diseases, Endocrine diseases, Cancer diseases, Genetic diseases	7	1	BRCA2	http://www.malacards.org/card/dysplastic_nevus_syndrome					0.493194	0.325508	0.0705267	0.321562	0.159302
1.46	Papillary Serous Adenocarcinoma	Cancer diseases	8	1	BRCA2	http://www.malacards.org/card/papillary_serous_adenocarcinoma					0.493194	0.325508	0.0705267	0.321562	0.159302
1.46	Fallopian Tube Carcinoma	Reproductive diseases, Cancer diseases, Rare diseases	8	1	BRCA2	http://www.malacards.org/card/fallopian_tube_carcinoma					0.493194	0.325508	0.0705267	0.321562	0.159302
1.46	Glycogen-Rich Clear Cell Breast Carcinoma	Cancer diseases	8	1	BRCA2	http://www.malacards.org/card/glycogen_rich_clear_cell_breast_carcinoma					0.493194	0.325508	0.0705267	0.321562	0.159302
1.46	Bilateral Breast Cancer	Cancer diseases	8	1	BRCA2	http://www.malacards.org/card/bilateral_breast_cancer					0.493194	0.325508	0.0705267	0.321562	0.159302
1.46	Hypertrophy of Breast	Reproductive diseases, Rare diseases, Genetic diseases	8	1	BRCA2	http://www.malacards.org/card/hypertrophy_of_breast					0.493194	0.325508	0.0705267	0.321562	0.159302
2.35	Craniopharyngioma	Endocrine diseases, Neuronal diseases, Cancer diseases, Rare diseases	15	1	CTNNB1	http://www.malacards.org/card/craniopharyngioma	Causative somatic mutation	CTNNB1			0.493098	0.318541	0.000377713	0.325938	0.025148
1.33	Chronic Active Epstein-Barr Virus Infection	Rare diseases	12	1	ATR	http://www.malacards.org/card/chronic_active_epstein_barr_virus_infection					0.491974	0.240575	0.0674004	0.350285	0.0654325
2.46	Amyotrophic Lateral Sclerosis Type 6	Neuronal diseases, Mental diseases, Rare diseases, Genetic diseases	17	2	ALS2, VTA1	http://www.malacards.org/card/amyotrophic_lateral_sclerosis_type_6					0.491792	0.235077	0.240486	0.113358	0.191799
1.42	Clostridium Difficile Colitis	Gastrointestinal diseases	9	1	CLASP2	http://www.malacards.org/card/clostridium_difficile_colitis					0.491772	0.202118	0.0501607	0.278835	0.0673727
2.62	Angiosarcoma	Cancer diseases, Rare diseases	13	2	FLT1, PROX1	http://www.malacards.org/card/angiosarcoma					0.491771	0.240968	0.0304898	0.230395	0.140892
1.42	Corneal Ulcer	Eye diseases	9	1	IFT122	http://www.malacards.org/card/corneal_ulcer					0.489964	0.315047	0.121511	0.263111	0.112202
2.83	Holoprosencephaly-2	Endocrine diseases, Neuronal diseases, Rare diseases, Fetal diseases, Genetic diseases	1	1	SIX3	http://www.malacards.org/card/holoprosencephaly_2	Causative mutation Ð Humsavar, Molecular basis known	SIX3			0.489906	0.290024	0.0823042	0.233195	0.0916124
2.83	Single Median Maxillary Central Incisor	Neuronal diseases, Oral diseases, Rare diseases, Fetal diseases, Genetic diseases	2	1	SIX3	http://www.malacards.org/card/single_median_maxillary_central_incisor	Pathogenic	SIX3			0.489906	0.290024	0.0823042	0.233195	0.0916124
2.83	Familial Schizencephaly, Shh-Related	Neuronal diseases, Rare diseases, Fetal diseases, Genetic diseases	2	1	SIX3	http://www.malacards.org/card/familial_schizencephaly_shh_related	Pathogenic	SIX3			0.489906	0.290024	0.0823042	0.233195	0.0916124
2.83	Six3-Related Holoprosencephaly	Endocrine diseases, Neuronal diseases, Rare diseases, Fetal diseases, Genetic diseases	1	1	SIX3	http://www.malacards.org/card/six3_related_holoprosencephaly	Pathogenic, Genetic Tests	SIX3			0.489906	0.290024	0.0823042	0.233195	0.0916124
2.58	Microinvasive Gastric Cancer	Gastrointestinal diseases, Cancer diseases	14	2	CHKA, MLH1	http://www.malacards.org/card/microinvasive_gastric_cancer					0.4899	0.132518	0.110938	0.178814	0.0339011
2.13	Physical Disorder		39	2	CEP63, SIX3	http://www.malacards.org/card/physical_disorder					0.488894	0.206313	0.0660007	0.249336	0.073823
1.34	Zellweger Syndrome	Rare diseases, Genetic diseases, Metabolic diseases	11	1	PEX1	http://www.malacards.org/card/zellweger_syndrome					0.488558	0.208614	0.172461	0.243302	0.186629
2.21	Sarcoma, Synovial	Cancer diseases, Rare diseases, Genetic diseases	29	2	BCL2, CTNNB1	http://www.malacards.org/card/sarcoma_synovial					0.488518	0.168148	0.0561225	0.322911	0.0255251
2.42	Buruli Ulcer	Skin diseases, Rare diseases, Genetic diseases, Infectious diseases	10	1	SLC11A1	http://www.malacards.org/card/buruli_ulcer	Risk factor	SLC11A1			0.488236	0.256812	0.0399377	0.2988	0.0221659
1.36	Blepharitis	Eye diseases	11	1	NGLY1	http://www.malacards.org/card/blepharitis					0.48786	0.283447	0.015953	0.356626	0.097572
2.33	Arx-Related Disorders	Genetic diseases	1	1	ARX	http://www.malacards.org/card/arx_related_disorders	Genetic Tests	ARX			0.487645	0.212613	0.0843625	0.289661	0.00697332
2.19	Pervasive Developmental Disorder	Mental diseases, Fetal diseases	33	2	NLGN4X, SHANK2	http://www.malacards.org/card/pervasive_developmental_disorder					0.487617	0.198948	0.000492493	0.149698	0.137264
2.84	Atypical Autism	Neuronal diseases, Mental diseases, Rare diseases, Fetal diseases	9	2	NLGN4X, ST7	http://www.malacards.org/card/atypical_autism					0.487506	0.191346	0.132709	0.165508	0.121389
1.33	Posterior Myocardial Infarction	Cardiovascular diseases, Genetic diseases	12	1	PIK3C2A	http://www.malacards.org/card/posterior_myocardial_infarction					0.487447	0.215452	0.0336338	0.263221	0.101389
1.33	Sarcocystosis	Skin diseases, Rare diseases, Infectious diseases	12	1	PIK3C2A	http://www.malacards.org/card/sarcocystosis					0.487447	0.215452	0.0336338	0.263221	0.101389
1.31	Lung Large Cell Carcinoma	Respiratory diseases, Cancer diseases, Rare diseases	13	1	ATR	http://www.malacards.org/card/lung_large_cell_carcinoma					0.487438	0.238357	0.0667789	0.347056	0.0648292
1.67	Orofaciodigital Syndrome	Eye diseases, Neuronal diseases, Bone diseases, Ear diseases, Oral diseases, Respiratory diseases, Nephrological diseases, Rare diseases, Fetal diseases, Genetic diseases	6	1	C2CD3	http://www.malacards.org/card/orofaciodigital_syndrome					0.48733	0.307505	0.133528	0.295322	0.0467837
2.32	Partington Syndrome	Neuronal diseases, Mental diseases, Rare diseases, Genetic diseases	17	1	ARX	http://www.malacards.org/card/partington_syndrome	Pathogenic, Molecular basis known, Causative germline mutation	ARX			0.486802	0.212246	0.0842168	0.289161	0.00696128
1.46	Subclavian Artery Aneurysm	Cardiovascular diseases	8	1	SLC25A16	http://www.malacards.org/card/subclavian_artery_aneurysm					0.486763	0.288651	0.148463	0.374321	0.00389898
1.42	Cochlear Disease	Ear diseases	9	1	MITF	http://www.malacards.org/card/cochlear_disease					0.486652	0.280311	0.0919771	0.288584	0.123123
1.42	Uterine Inversion	Reproductive diseases	9	1	MITF	http://www.malacards.org/card/uterine_inversion					0.486652	0.280311	0.0919771	0.288584	0.123123
1.42	Malignant Spindle Cell Melanoma	Skin diseases, Cancer diseases	9	1	MITF	http://www.malacards.org/card/malignant_spindle_cell_melanoma					0.486652	0.280311	0.0919771	0.288584	0.123123
1.46	Peroxisomal Acyl-Coa Oxidase Deficiency	Endocrine diseases, Neuronal diseases, Rare diseases, Genetic diseases, Metabolic diseases	7	1	CAT	http://www.malacards.org/card/peroxisomal_acyl_coa_oxidase_deficiency					0.486155	0.294124	0.182308	0.128345	0.20856
2.81	Lymphoma, Non-Hodgkin	Immune diseases, Cancer diseases, Genetic diseases	81	3	BCL2, BIRC3, CDKN1B	http://www.malacards.org/card/lymphoma_non_hodgkin					0.485721	0.122466	0.140373	0.17439	0.0907488
1.42	Peritoneum Cancer	Cancer diseases	9	1	BRCA2	http://www.malacards.org/card/peritoneum_cancer					0.485276	0.320282	0.0693944	0.3164	0.156744
1.31	8p11 Myeloproliferative Syndrome	Immune diseases, Blood diseases, Cancer diseases, Rare diseases	13	1	FGFR1OP2	http://www.malacards.org/card/8p11_myeloproliferative_syndrome					0.485205	0.265407	0.156236	0.21155	0.147017
1.26	Cloacogenic Carcinoma	Gastrointestinal diseases, Cancer diseases	16	1	SOX2	http://www.malacards.org/card/cloacogenic_carcinoma					0.485069	0.359436	0.00669396	0.303653	0.0329847
1.5	Acute Hemorrhagic Conjunctivitis	Infectious diseases	5	1	EVC	http://www.malacards.org/card/acute_hemorrhagic_conjunctivitis					0.484805	0.248705	0.103263	0.312699	0.0356332
1.5	Breast Cyst	Cancer diseases	7	1	TGFB2	http://www.malacards.org/card/breast_cyst					0.4845	0.249033	0.25727	0.256785	0.0939931
1.5	Fuchs' Heterochromic Uveitis	Eye diseases, Rare diseases	5	1	TGFB2	http://www.malacards.org/card/fuchs_heterochromic_uveitis					0.4845	0.249033	0.25727	0.256785	0.0939931
2.33	Cone-Rod Dystrophy 1	Rare diseases, Genetic diseases	3	1	RPGR	http://www.malacards.org/card/cone_rod_dystrophy_1	Genetic Tests	RPGR			0.484241	0.235825	0.114281	0.276502	0.107017
2.33	Rpgr-Related Retinitis Pigmentosa	Eye diseases, Rare diseases, Genetic diseases	1	1	RPGR	http://www.malacards.org/card/rpgr_related_retinitis_pigmentosa	Genetic Tests	RPGR			0.484241	0.235825	0.114281	0.276502	0.107017
2.51	Suppression Amblyopia	Eye diseases	16	2	RPGR, SIX3	http://www.malacards.org/card/suppression_amblyopia					0.48417	0.26121	0.0978023	0.253463	0.0987706
2.33	Arrhythmogenic Right Ventricular Dysplasia/cardiomyopathy11	Genetic diseases	1	1	DSC2	http://www.malacards.org/card/arrhythmogenic_right_ventricular_dysplasia_cardiomyopathy11	Genetic Tests	DSC2			0.483973	0.323778	0.173262	0.138416	0.0696921
2.83	Sinusitis	Respiratory diseases	224	4	CEP126, CXorf57, DSC2, SLC26A4	http://www.malacards.org/card/sinusitis			Nose	CEP126, CXorf57, DSC2, SLC26A4	0.483519	0.213071	0.156821	0.195503	0.0765572
1.5	Norse	Neuronal diseases, Rare diseases	2	1	RNF146	http://www.malacards.org/card/norse					0.483106	0.213533	0.209185	0.276337	0.054591
1.31	Legionaire Disease	Genetic diseases, Infectious diseases	12	1	PIK3C2A	http://www.malacards.org/card/legionaire_disease					0.482953	0.213465	0.0333237	0.260794	0.100454
1.31	Myositis Fibrosa	Muscle diseases	13	1	PIK3C2A	http://www.malacards.org/card/myositis_fibrosa					0.482953	0.213465	0.0333237	0.260794	0.100454
1.5	Muscular Dystrophy-Dystroglycanopathy	Eye diseases, Neuronal diseases, Mental diseases, Muscle diseases, Rare diseases, Fetal diseases, Genetic diseases, Metabolic diseases	5	1	POMT2	http://www.malacards.org/card/muscular_dystrophy_dystroglycanopathy					0.482874	0.254958	0.118304	0.213913	0.113958
1.26	Osteomyelitis	Bone diseases, Rare diseases	16	1	PPP3CA	http://www.malacards.org/card/osteomyelitis					0.482821	0.226926	0.0403156	0.255895	0.130362
2.36	Primary Cutaneous Amyloidosis	Skin diseases, Rare diseases, Genetic diseases, Metabolic diseases	20	2	CALM1, MYLK	http://www.malacards.org/card/primary_cutaneous_amyloidosis					0.482698	0.18246	0.0573928	0.260174	0.122123
1.39	Mohr-Tranebjaerg Syndrome	Rare diseases, Genetic diseases, Metabolic diseases	8	1	ANO3	http://www.malacards.org/card/mohr_tranebjaerg_syndrome					0.482049	0.210655	0.13642	0.121476	0.238614
2.83	Spastic Paralysis, Infantile Onset Ascending	Neuronal diseases, Rare diseases, Genetic diseases	1	1	ALS2	http://www.malacards.org/card/spastic_paralysis_infantile_onset_ascending	Molecular basis known	ALS2			0.48201	0.17256	0.274264	0.146049	0.133035
2.83	Infantile-Onset Ascending Hereditary Spastic Paralysis	Neuronal diseases, Rare diseases, Genetic diseases	2	1	ALS2	http://www.malacards.org/card/infantile_onset_ascending_hereditary_spastic_paralysis	Pathogenic, Causative germline mutation	ALS2			0.48201	0.17256	0.274264	0.146049	0.133035
2.83	Primary Lateral Sclerosis, Juvenile	Neuronal diseases, Rare diseases, Genetic diseases	2	1	ALS2	http://www.malacards.org/card/primary_lateral_sclerosis_juvenile	Pathogenic, Molecular basis known, Causative germline mutation	ALS2			0.48201	0.17256	0.274264	0.146049	0.133035
2.83	Colorectal Cancer, Hereditary Nonpolyposis, Type 1	Cancer diseases, Genetic diseases	4	1	MLH1	http://www.malacards.org/card/colorectal_cancer_hereditary_nonpolyposis_type_1	Pathogenic	MLH1			0.481764	0.0881629	0.177771	0.255817	0.0368068
2.83	Colorectal Cancer, Hereditary Nonpolyposis, Type 2	Cancer diseases, Genetic diseases	1	1	MLH1	http://www.malacards.org/card/colorectal_cancer_hereditary_nonpolyposis_type_2	Pathogenic, Causative mutation Ð Humsavar, Molecular basis known	MLH1			0.481764	0.0881629	0.177771	0.255817	0.0368068
1.5	Finger Agnosia	Fetal diseases	6	1	AGL	http://www.malacards.org/card/finger_agnosia					0.481736	0.193658	0.0220153	0.292895	0.00910481
1.5	Nelson Syndrome	Skin diseases, Endocrine diseases, Cancer diseases, Rare diseases	6	1	NR3C1	http://www.malacards.org/card/nelson_syndrome					0.480723	0.317277	0.0444188	0.180752	0.0668205
1.5	Corticosteroid-Binding Globulin Deficiency	Endocrine diseases, Rare diseases, Genetic diseases	2	1	NR3C1	http://www.malacards.org/card/corticosteroid_binding_globulin_deficiency					0.480723	0.317277	0.0444188	0.180752	0.0668205
1.5	Allergic Urticaria	Skin diseases, Immune diseases	6	1	NR3C1	http://www.malacards.org/card/allergic_urticaria					0.480723	0.317277	0.0444188	0.180752	0.0668205
1.5	Miliaria	Skin diseases	6	1	NR3C1	http://www.malacards.org/card/miliaria					0.480723	0.317277	0.0444188	0.180752	0.0668205
1.42	Granuloma Inguinale	Skin diseases, Rare diseases, Infectious diseases	9	1	TBP	http://www.malacards.org/card/granuloma_inguinale					0.480643	0.162457	0.15717	0.304728	0.0884383
1.39	Angiomyolipoma	Cancer diseases	10	1	MITF	http://www.malacards.org/card/angiomyolipoma					0.48055	0.276797	0.0908239	0.284966	0.121579
2.14	Skin Disease	Skin diseases	38	2	ATP2C1, CAT	http://www.malacards.org/card/skin_disease					0.48042	0.258466	0.0972131	0.208502	0.125774
2.48	Enterobiasis	Gastrointestinal diseases, Rare diseases, Infectious diseases	17	2	MCU, SLC11A1	http://www.malacards.org/card/enterobiasis					0.480396	0.214497	0.0657662	0.288478	0.0555818
1.24	Cellular Schwannoma	Neuronal diseases, Cancer diseases	17	1	SOX2	http://www.malacards.org/card/cellular_schwannoma					0.480215	0.355839	0.00662697	0.300615	0.0326546
1.24	Extragonadal Seminoma	Cancer diseases	17	1	SOX2	http://www.malacards.org/card/extragonadal_seminoma					0.480215	0.355839	0.00662697	0.300615	0.0326546
2.63	Cardiomyopathy	Cardiovascular diseases, Rare diseases, Genetic diseases	126	3	CTNNB1, DSC2, SGCB	http://www.malacards.org/card/cardiomyopathy					0.479962	0.259979	0.130512	0.169107	0.0918327
2.89	Mitochondrial Complex I Deficiency	Rare diseases, Genetic diseases, Metabolic diseases	32	2	GDAP1, NDUFB3	http://www.malacards.org/card/mitochondrial_complex_i_deficiency	Pathogenic, Molecular basis known	NDUFB3			0.479425	0.211906	0.0977067	0.198242	0.087471
1.98	Central Nervous System Disease	Neuronal diseases, Immune diseases	60	2	CISH, GRM1	http://www.malacards.org/card/central_nervous_system_disease					0.479312	0.156256	0.0283992	0.238458	0.0572778
1.39	Synchronous Bilateral Breast Carcinoma	Cancer diseases	10	1	BRCA2	http://www.malacards.org/card/synchronous_bilateral_breast_carcinoma					0.479191	0.316266	0.0685243	0.312433	0.154779
1.39	Ocular Melanoma	Skin diseases, Eye diseases, Neuronal diseases, Cancer diseases, Rare diseases	10	1	BRCA2	http://www.malacards.org/card/ocular_melanoma					0.479191	0.316266	0.0685243	0.312433	0.154779
1.5	Leprechaunism	Skin diseases, Endocrine diseases, Rare diseases, Fetal diseases, Genetic diseases	6	1	IRS1	http://www.malacards.org/card/leprechaunism					0.479087	0.150433	0.148996	0.19403	0.192114
1.5	Mixed Cell Adenoma	Cancer diseases	2	1	IRS1	http://www.malacards.org/card/mixed_cell_adenoma					0.479087	0.150433	0.148996	0.19403	0.192114
1.47	Loeys-Dietz Syndrome	Rare diseases, Genetic diseases	11	1	TGFB2	http://www.malacards.org/card/loeys_dietz_syndrome					0.478933	0.246171	0.254313	0.253834	0.0929129
1.46	Carotid Artery Thrombosis	Cardiovascular diseases, Blood diseases	8	1	PLK4	http://www.malacards.org/card/carotid_artery_thrombosis					0.47854	0.228742	0.0521608	0.318229	0.0149304
1.38	Waardenburg's Syndrome	Skin diseases, Eye diseases, Ear diseases, Rare diseases, Fetal diseases, Genetic diseases	10	1	MITF	http://www.malacards.org/card/waardenburgs_syndrome					0.478488	0.275609	0.0904342	0.283743	0.121057
1.29	Toxic Myocarditis	Cardiovascular diseases	14	1	PIK3C2A	http://www.malacards.org/card/toxic_myocarditis					0.478396	0.211451	0.0330093	0.258334	0.0995063
1.29	Acute Kidney Failure	Nephrological diseases, Genetic diseases	14	1	PIK3C2A	http://www.malacards.org/card/acute_kidney_failure					0.478396	0.211451	0.0330093	0.258334	0.0995063
1.29	Diaphragmatic Eventration	Muscle diseases	14	1	PIK3C2A	http://www.malacards.org/card/diaphragmatic_eventration					0.478396	0.211451	0.0330093	0.258334	0.0995063
1.29	Pericardial Effusion	Cardiovascular diseases	14	1	PIK3C2A	http://www.malacards.org/card/pericardial_effusion					0.478396	0.211451	0.0330093	0.258334	0.0995063
1.42	Cryptosporidiosis	Gastrointestinal diseases, Rare diseases, Infectious diseases	9	1	CAT	http://www.malacards.org/card/cryptosporidiosis					0.47835	0.289402	0.179381	0.126284	0.205212
1.42	Spermatic Cord Torsion	Reproductive diseases	9	1	CAT	http://www.malacards.org/card/spermatic_cord_torsion					0.47835	0.289402	0.179381	0.126284	0.205212
1.46	Sost-Related Sclerosing Bone Dysplasia	Bone diseases	8	1	MEF2A	http://www.malacards.org/card/sost_related_sclerosing_bone_dysplasia					0.4783	0.279805	0.0789194	0.203277	0.0741364
1.07	Dravet Syndrome	Neuronal diseases, Rare diseases, Genetic diseases	30	1	CHD2	http://www.malacards.org/card/dravet_syndrome					0.478077	0.318399	0.015155	0.294017	0.0487638
1.24	Agraphia	Fetal diseases	17	1	PPP3CA	http://www.malacards.org/card/agraphia					0.47799	0.224655	0.0399121	0.253335	0.129057
1.23	Botryoid Rhabdomyosarcoma	Cancer diseases, Rare diseases	18	1	SOX2	http://www.malacards.org/card/botryoid_rhabdomyosarcoma					0.477763	0.354022	0.00659313	0.29908	0.0324879
1.23	Teratoma	Cancer diseases, Rare diseases	18	1	SOX2	http://www.malacards.org/card/teratoma					0.477763	0.354022	0.00659313	0.29908	0.0324879
2.33	Spastic Paraplegia 49	Eye diseases, Neuronal diseases, Bone diseases, Mental diseases, Gastrointestinal diseases, Rare diseases, Genetic diseases, Metabolic diseases	2	1	TECPR2	http://www.malacards.org/card/spastic_paraplegia_49	Genetic Tests	TECPR2			0.47753	0.128456	0.312782	0.155675	0.120338
1.5	Ileocolitis	Gastrointestinal diseases	7	1	DLG5	http://www.malacards.org/card/ileocolitis					0.477511	0.204852	0.0164741	0.242575	0.0787893
1.46	Spiradenoma	Skin diseases, Eye diseases, Ear diseases, Cancer diseases, Rare diseases	8	1	TGFB2	http://www.malacards.org/card/spiradenoma					0.477051	0.245204	0.253314	0.252837	0.0925478
1.46	Neovascular Glaucoma	Eye diseases, Rare diseases	8	1	TGFB2	http://www.malacards.org/card/neovascular_glaucoma					0.477051	0.245204	0.253314	0.252837	0.0925478
1.46	Bifid Uvula	Rare diseases, Fetal diseases	8	1	TGFB2	http://www.malacards.org/card/bifid_uvula					0.477051	0.245204	0.253314	0.252837	0.0925478
2.4	Angiokeratoma	Skin diseases, Cancer diseases	20	2	FLT1, PROX1	http://www.malacards.org/card/angiokeratoma					0.476033	0.233256	0.0295141	0.223021	0.136383
2.4	Gallbladder Cancer	Gastrointestinal diseases, Cancer diseases, Rare diseases	20	2	CTNNB1, MLH1	http://www.malacards.org/card/gallbladder_cancer					0.475793	0.197216	0.087966	0.283572	0.030308
2.4	Intestinal Benign Neoplasm	Gastrointestinal diseases, Cancer diseases	20	2	CTNNB1, MLH1	http://www.malacards.org/card/intestinal_benign_neoplasm					0.475793	0.197216	0.087966	0.283572	0.030308
1.39	Hereditary Ataxia	Neuronal diseases, Rare diseases, Genetic diseases	9	1	TBP	http://www.malacards.org/card/hereditary_ataxia					0.474616	0.16042	0.1552	0.300907	0.0873294
1.39	Choreoacanthocytosis	Skin diseases, Neuronal diseases, Rare diseases, Genetic diseases	9	1	TBP	http://www.malacards.org/card/choreoacanthocytosis					0.474616	0.16042	0.1552	0.300907	0.0873294
1.39	Squamous Cell Papilloma	Skin diseases, Cancer diseases	10	1	TBP	http://www.malacards.org/card/squamous_cell_papilloma					0.474616	0.16042	0.1552	0.300907	0.0873294
1.5	Pseudopseudohypoparathyroidism	Skin diseases, Endocrine diseases, Eye diseases, Bone diseases, Nephrological diseases, Rare diseases, Fetal diseases, Genetic diseases, Metabolic diseases	6	1	GNA11	http://www.malacards.org/card/pseudopseudohypoparathyroidism					0.474592	0.252483	0.0597986	0.164684	0.107258
1.5	Mongolian Spot	Skin diseases	6	1	GNA11	http://www.malacards.org/card/mongolian_spot					0.474592	0.252483	0.0597986	0.164684	0.107258
1.5	Foramen Magnum Meningioma	Neuronal diseases, Cancer diseases	2	1	GNA11	http://www.malacards.org/card/foramen_magnum_meningioma					0.474592	0.252483	0.0597986	0.164684	0.107258
1.5	Malignant Conjunctiva Melanoma	Skin diseases, Neuronal diseases, Cancer diseases, Rare diseases	7	1	GNA11	http://www.malacards.org/card/malignant_conjunctiva_melanoma					0.474592	0.252483	0.0597986	0.164684	0.107258
2.22	Familial Isolated Arrhythmogenic Ventricular Dysplasia, Biventricular Form	Cardiovascular diseases, Rare diseases, Genetic diseases	12	1	DSC2	http://www.malacards.org/card/familial_isolated_arrhythmogenic_ventricular_dysplasia_biventricular_form	Causative germline mutation	DSC2			0.474453	0.317409	0.169854	0.135694	0.0683213
2.22	Familial Isolated Arrhythmogenic Ventricular Dysplasia, Left Dominant Form	Cardiovascular diseases, Rare diseases, Genetic diseases	12	1	DSC2	http://www.malacards.org/card/familial_isolated_arrhythmogenic_ventricular_dysplasia_left_dominant_form	Causative germline mutation	DSC2			0.474453	0.317409	0.169854	0.135694	0.0683213
2.22	Familial Isolated Arrhythmogenic Ventricular Dysplasia, Right Dominant Form	Cardiovascular diseases, Rare diseases, Genetic diseases	12	1	DSC2	http://www.malacards.org/card/familial_isolated_arrhythmogenic_ventricular_dysplasia_right_dominant_form	Causative germline mutation	DSC2			0.474453	0.317409	0.169854	0.135694	0.0683213
2.07	Autosomal Genetic Disease	Genetic diseases	46	2	MLH1, PKD2	http://www.malacards.org/card/autosomal_genetic_disease					0.474348	0.14017	0.0883188	0.273462	0.0210373
2.38	Colorectal Adenocarcinoma	Gastrointestinal diseases, Cancer diseases	21	2	CTNNB1, MLH1	http://www.malacards.org/card/colorectal_adenocarcinoma					0.47424	0.196573	0.0876789	0.282647	0.0302091
2.38	Gastrointestinal System Benign Neoplasm	Gastrointestinal diseases, Cancer diseases	21	2	CTNNB1, MLH1	http://www.malacards.org/card/gastrointestinal_system_benign_neoplasm					0.47424	0.196573	0.0876789	0.282647	0.0302091
1.27	Asphyxia Neonatorum	Respiratory diseases, Rare diseases, Fetal diseases	15	1	PIK3C2A	http://www.malacards.org/card/asphyxia_neonatorum					0.473775	0.209409	0.0326905	0.255839	0.0985452
1.39	Secretory Diarrhea	Gastrointestinal diseases	10	1	SHANK2	http://www.malacards.org/card/secretory_diarrhea					0.473512	0.250961	0.000748148	0.202189	0.130689
1.22	Microcephaly	Eye diseases, Neuronal diseases, Mental diseases, Rare diseases, Fetal diseases, Genetic diseases	30	2	ANKLE2, CEP152	http://www.malacards.org/card/microcephaly					0.473349	0.317854	0.0984565	0.31951	0.0863861
1.46	Anterior Uveitis	Eye diseases, Rare diseases	8	1	NR3C1	http://www.malacards.org/card/anterior_uveitis					0.473332	0.312399	0.0437358	0.177973	0.0657931
1.2	Cerebritis	Neuronal diseases	20	1	GRIA1	http://www.malacards.org/card/cerebritis					0.473043	0.328292	0.0799444	0.289976	0.00591304
1.21	Lung Squamous Cell Carcinoma	Skin diseases, Respiratory diseases, Cancer diseases	19	1	SOX2	http://www.malacards.org/card/lung_squamous_cell_carcinoma					0.472807	0.35035	0.00652473	0.295977	0.0321509
1.39	Sulfhemoglobinemia	Blood diseases	10	1	CAT	http://www.malacards.org/card/sulfhemoglobinemia					0.472352	0.285773	0.177132	0.124701	0.202639
1.21	Ptosis	Eye diseases, Rare diseases, Genetic diseases	19	1	ZFHX4	http://www.malacards.org/card/ptosis					0.471203	0.241256	0.0323716	0.25068	0.106021
1.32	Wagr Syndrome	Endocrine diseases, Eye diseases, Neuronal diseases, Mental diseases, Reproductive diseases, Nephrological diseases, Cancer diseases, Rare diseases, Fetal diseases, Genetic diseases	10	1	LGR4	http://www.malacards.org/card/wagr_syndrome					0.471045	0.249654	0.178526	0.196426	0.210086
2.33	Dfna91 Nonsyndromic Hearing Loss and Deafness	Ear diseases, Genetic diseases	1	1	SERPINB6	http://www.malacards.org/card/dfna91_nonsyndromic_hearing_loss_and_deafness	Genetic Tests	SERPINB6			0.470998	0.257165	0.151661	0.261404	0.0489838
1.19	Status Epilepticus	Neuronal diseases, Cancer diseases, Rare diseases	21	1	GRIA1	http://www.malacards.org/card/status_epilepticus					0.470507	0.326532	0.0795158	0.288421	0.00588134
2.83	Aortic Aneurysm, Familial Thoracic 7	Cardiovascular diseases, Rare diseases, Genetic diseases	1	1	MYLK	http://www.malacards.org/card/aortic_aneurysm_familial_thoracic_7	Pathogenic, Causative mutation Ð Humsavar, Molecular basis known	MYLK			0.470255	0.143898	0.0154244	0.308017	0.109569
2.83	Mylk-Related Thoracic Aortic Aneurysms and Aortic Dissections	Genetic diseases	1	1	MYLK	http://www.malacards.org/card/mylk_related_thoracic_aortic_aneurysms_and_aortic_dissections	Pathogenic, Genetic Tests	MYLK			0.470255	0.143898	0.0154244	0.308017	0.109569
2.33	Evc2-Related Ellis-Van Creveld Syndrome	Genetic diseases	1	1	EVC2	http://www.malacards.org/card/evc2_related_ellis_van_creveld_syndrome	Genetic Tests	EVC2			0.470229	0.209252	0.0625404	0.265679	0.0710046
1.69	Translocation Renal Cell Carcinoma	Nephrological diseases, Cancer diseases, Rare diseases	13	1	NONO	http://www.malacards.org/card/translocation_renal_cell_carcinoma	Gene fusion	NONO			0.469993	0.278706	0.107628	0.328525	0.068619
1.5	Tinea Pedis	Skin diseases, Infectious diseases	6	1	ICK	http://www.malacards.org/card/tinea_pedis					0.46998	0.139584	0.163553	0.182822	0.069087
1.5	Epulis	Oral diseases, Cancer diseases, Rare diseases	7	1	ICK	http://www.malacards.org/card/epulis					0.46998	0.139584	0.163553	0.182822	0.069087
2.62	Corneal Neovascularization	Eye diseases	13	2	FLT1, SLIT2	http://www.malacards.org/card/corneal_neovascularization					0.4697	0.208312	0.052489	0.217001	0.101925
2.3	Cerebral Degeneration	Neuronal diseases	25	2	ABCD2, SLC25A17	http://www.malacards.org/card/cerebral_degeneration					0.46968	0.178713	0.139025	0.16204	0.129397
1.36	Sesame Syndrome	Neuronal diseases, Ear diseases, Mental diseases, Nephrological diseases, Rare diseases, Fetal diseases, Genetic diseases	10	1	KCNA1	http://www.malacards.org/card/sesame_syndrome					0.469522	0.289226	0.0708978	0.181236	0.0995387
1.42	Multilocular Clear Cell Renal Cell Carcinoma	Nephrological diseases, Cancer diseases	9	1	TGFB2	http://www.malacards.org/card/multilocular_clear_cell_renal_cell_carcinoma					0.469392	0.241267	0.249247	0.248778	0.091062
2.83	Bietti Crystalline Corneoretinal Dystrophy	Eye diseases, Rare diseases, Genetic diseases	2	1	CYP4V2	http://www.malacards.org/card/bietti_crystalline_corneoretinal_dystrophy	Causative mutation Ð Humsavar, Genetic Tests, Molecular basis known, Causative germline mutation	CYP4V2			0.469241	0.156257	0.226174	0.194735	0.0417155
1.31	Panuveitis	Eye diseases, Rare diseases	13	1	UACA	http://www.malacards.org/card/panuveitis					0.469209	0.270264	0.0295132	0.330323	0.0980646
1.33	Ankylosis	Bone diseases	12	1	SLC20A2	http://www.malacards.org/card/ankylosis					0.468517	0.228168	0.0712146	0.390275	0.0246909
1.5	Cerebral Cavernous Malformations-2	Eye diseases, Neuronal diseases, Cardiovascular diseases, Rare diseases, Fetal diseases, Genetic diseases	4	1	KRIT1	http://www.malacards.org/card/cerebral_cavernous_malformations_2					0.468478	0.247356	0.0824522	0.197698	0.11993
1.5	Glomuvenous Malformations	Cardiovascular diseases, Cancer diseases, Rare diseases, Fetal diseases, Genetic diseases	2	1	KRIT1	http://www.malacards.org/card/glomuvenous_malformations					0.468478	0.247356	0.0824522	0.197698	0.11993
1.5	Retinal Cavernous Hemangioma	Eye diseases, Neuronal diseases, Cardiovascular diseases, Cancer diseases, Rare diseases, Fetal diseases	1	1	KRIT1	http://www.malacards.org/card/retinal_cavernous_hemangioma					0.468478	0.247356	0.0824522	0.197698	0.11993
1.5	Human Venous Malformation	Cardiovascular diseases	5	1	KRIT1	http://www.malacards.org/card/human_venous_malformation					0.468478	0.247356	0.0824522	0.197698	0.11993
1.36	Tuberculous Peritonitis	Gastrointestinal diseases, Infectious diseases	11	1	TBP	http://www.malacards.org/card/tuberculous_peritonitis					0.468463	0.158341	0.153188	0.297006	0.0861973
1.36	Pleural Tuberculosis	Infectious diseases	11	1	TBP	http://www.malacards.org/card/pleural_tuberculosis					0.468463	0.158341	0.153188	0.297006	0.0861973
2.83	Hemophagocytic Lymphohistiocytosis, Familial, 5	Neuronal diseases, Immune diseases, Blood diseases, Rare diseases, Genetic diseases	2	1	FHL5	http://www.malacards.org/card/hemophagocytic_lymphohistiocytosis_familial_5	Molecular basis known	FHL5			0.468035	0.167088	0.172705	0.191894	0.0659929
1.33	Neurofibroma	Neuronal diseases, Cancer diseases, Rare diseases	12	1	MITF	http://www.malacards.org/card/neurofibroma					0.467959	0.269544	0.0884443	0.2775	0.118394
1.33	Fasciitis		12	1	MITF	http://www.malacards.org/card/fasciitis					0.467959	0.269544	0.0884443	0.2775	0.118394
1.33	Clear Cell Sarcoma	Skin diseases, Cancer diseases	12	1	MITF	http://www.malacards.org/card/clear_cell_sarcoma					0.467959	0.269544	0.0884443	0.2775	0.118394
1.33	Fibrous Histiocytoma	Cancer diseases	12	1	MITF	http://www.malacards.org/card/fibrous_histiocytoma					0.467959	0.269544	0.0884443	0.2775	0.118394
2.3	Colon Adenocarcinoma	Gastrointestinal diseases, Cancer diseases	25	2	CTNNB1, MLH1	http://www.malacards.org/card/colon_adenocarcinoma					0.46781	0.193907	0.0864902	0.278815	0.0297995
1.19	Germ Cell and Embryonal Cancer	Cancer diseases	21	1	SOX2	http://www.malacards.org/card/germ_cell_and_embryonal_cancer					0.467781	0.346626	0.00645538	0.292831	0.0318091
2.23	Ischemic Heart Disease	Bone diseases, Immune diseases, Cardiovascular diseases	167	3	COX16, SLIT2, VTI1A	http://www.malacards.org/card/ischemic_heart_disease			Endothelium	COX16, SLIT2, VTI1A	0.467738	0.147026	0.196762	0.15451	0.166203
2.11	Ohtahara Syndrome	Neuronal diseases, Rare diseases, Genetic diseases	21	1	ARX	http://www.malacards.org/card/ohtahara_syndrome	Causative germline mutation	ARX			0.467702	0.203918	0.0809124	0.277815	0.00668813
1.46	Conjunctival Cancer	Neuronal diseases, Cancer diseases	8	1	GNA11	http://www.malacards.org/card/conjunctival_cancer					0.467295	0.248601	0.0588792	0.162151	0.105609
1.36	Hemometra	Reproductive diseases, Blood diseases	11	1	SLC25A16	http://www.malacards.org/card/hemometra					0.466812	0.27682	0.142378	0.358978	0.00373916
1.24	Spinal Cord Injury	Neuronal diseases, Rare diseases	17	1	EPHA4	http://www.malacards.org/card/spinal_cord_injury					0.466473	0.274752	0.0440817	0.316735	0.0427289
1.36	Avascular Necrosis of the Femoral Head	Bone diseases, Rare diseases, Genetic diseases	10	1	CAT	http://www.malacards.org/card/avascular_necrosis_of_the_femoral_head					0.466228	0.282068	0.174836	0.123084	0.200012
1.36	Asbestosis	Respiratory diseases, Rare diseases	11	1	CAT	http://www.malacards.org/card/asbestosis					0.466228	0.282068	0.174836	0.123084	0.200012
1.36	Myocardial Stunning	Cardiovascular diseases	11	1	CAT	http://www.malacards.org/card/myocardial_stunning					0.466228	0.282068	0.174836	0.123084	0.200012
2.33	Primary Ciliary Dyskinesia16: Dnal1-Related Primary Ciliary Dyskinesia	Genetic diseases	1	1	DNAL1	http://www.malacards.org/card/primary_ciliary_dyskinesia16_dnal1_related_primary_ciliary_dyskinesia	Genetic Tests	DNAL1			0.465848	0.152798	0.0740698	0.212427	0.00437897
1.42	Discoid Lupus Erythematosus	Skin diseases, Rare diseases	9	1	NR3C1	http://www.malacards.org/card/discoid_lupus_erythematosus					0.465732	0.307383	0.0430337	0.175115	0.0647368
1.21	Middle Cerebral Artery Infarction	Cardiovascular diseases	19	1	XRCC6	http://www.malacards.org/card/middle_cerebral_artery_infarction					0.465112	0.247439	0.149766	0.246509	0.0506972
2.39	Baller-Gerold Syndrome	Bone diseases, Rare diseases, Fetal diseases, Genetic diseases	19	2	DDX11, FANCB	http://www.malacards.org/card/baller_gerold_syndrome					0.464711	0.290212	0.0126216	0.17357	0.121754
2.67	Chronic Neutrophilic Leukemia	Blood diseases, Cancer diseases, Rare diseases	11	2	AFF1, BIRC3	http://www.malacards.org/card/chronic_neutrophilic_leukemia					0.464475	0.162102	0.153509	0.163519	0.13702
1.23	Extrinsic Cardiomyopathy	Cardiovascular diseases	18	1	PIK3C2A	http://www.malacards.org/card/extrinsic_cardiomyopathy					0.464339	0.205238	0.0320394	0.250743	0.0965826
1.31	Aphasia	Fetal diseases	13	1	SLC20A2	http://www.malacards.org/card/aphasia					0.464197	0.226064	0.070558	0.386676	0.0244632
1.29	Fetal Alcohol Syndrome	Neuronal diseases, Rare diseases, Fetal diseases	14	1	ADNP	http://www.malacards.org/card/fetal_alcohol_syndrome					0.463917	0.234278	0.0607732	0.21201	0.0445361
1.31	Piebaldism	Skin diseases, Eye diseases, Rare diseases, Genetic diseases	11	1	MITF	http://www.malacards.org/card/piebaldism					0.463644	0.267059	0.0876288	0.274941	0.117302
1.31	Pigmentation Disease	Skin diseases	13	1	MITF	http://www.malacards.org/card/pigmentation_disease					0.463644	0.267059	0.0876288	0.274941	0.117302
2.84	Kartagener Syndrome	Rare diseases, Genetic diseases	40	2	CCDC40, DNAL1	http://www.malacards.org/card/kartagener_syndrome	Pathogenic	DNAL1			0.463353	0.174684	0.108193	0.15615	0.0482814
2.3	Retinoblastoma	Endocrine diseases, Eye diseases, Neuronal diseases, Cancer diseases, Rare diseases, Genetic diseases	32	2	CDKN1B, RBBP7	http://www.malacards.org/card/retinoblastoma					0.462968	0.261808	0.041019	0.184261	0.079399
2.3	Retinal Cancer	Eye diseases, Neuronal diseases, Cancer diseases	25	2	CDKN1B, RBBP7	http://www.malacards.org/card/retinal_cancer					0.462968	0.261808	0.041019	0.184261	0.079399
2.78	Darier Disease	Skin diseases, Rare diseases, Genetic diseases	9	2	ATP2C1, DSC2	http://www.malacards.org/card/darier_disease					0.462725	0.263753	0.0896992	0.205913	0.0552031
1.5	Hypoglycemic Coma	Endocrine diseases, Neuronal diseases	7	1	RAPGEF4	http://www.malacards.org/card/hypoglycemic_coma					0.462404	0.15768	0.147507	0.244149	0.184499
1.31	Fallopian Tube Adenocarcinoma	Reproductive diseases, Cancer diseases	13	1	BRCA2	http://www.malacards.org/card/fallopian_tube_adenocarcinoma					0.462334	0.30514	0.0661137	0.301441	0.149334
1.31	Cystadenofibroma	Cancer diseases	13	1	BRCA2	http://www.malacards.org/card/cystadenofibroma					0.462334	0.30514	0.0661137	0.301441	0.149334
1.28	Axenfeld-Rieger Syndrome, Type 3	Eye diseases, Rare diseases, Fetal diseases, Genetic diseases	12	1	LGR4	http://www.malacards.org/card/axenfeld_rieger_syndrome_type_3_2					0.462197	0.244964	0.175173	0.192736	0.20614
1.34	Favism	Genetic diseases, Metabolic diseases	11	1	CAT	http://www.malacards.org/card/favism					0.462075	0.279555	0.173278	0.121988	0.19823
1.4	Aldosteronism, Glucocorticoid-Remediable	Endocrine diseases, Cardiovascular diseases, Nephrological diseases, Rare diseases, Genetic diseases	8	1	NR3C1	http://www.malacards.org/card/aldosteronism_glucocorticoid_remediable					0.461853	0.304823	0.0426752	0.173657	0.0641975
1.5	Human Monocytic Ehrlichiosis	Rare diseases, Infectious diseases	7	1	APOPT1	http://www.malacards.org/card/human_monocytic_ehrlichiosis					0.46161	0.286198	0.0204032	0.242345	0.0202647
1.2	Xeroderma Pigmentosum, Group a	Skin diseases, Eye diseases, Neuronal diseases, Ear diseases, Cancer diseases, Rare diseases, Fetal diseases, Genetic diseases	19	1	ATR	http://www.malacards.org/card/xeroderma_pigmentosum_group_a					0.461333	0.225592	0.0632027	0.328469	0.0613573
1.67	Myoglobinuria	Neuronal diseases, Muscle diseases, Rare diseases, Genetic diseases, Metabolic diseases	6	1	LPIN1	http://www.malacards.org/card/myoglobinuria					0.461319	0.107949	0.0641234	0.224663	0.125018
1.5	Transverse Myelitis	Neuronal diseases, Rare diseases	6	1	AMPH	http://www.malacards.org/card/transverse_myelitis					0.46085	0.120743	0.000603713	0.175584	0.0594496
1.5	Paraneoplastic Polyneuropathy	Neuronal diseases	1	1	AMPH	http://www.malacards.org/card/paraneoplastic_polyneuropathy					0.46085	0.120743	0.000603713	0.175584	0.0594496
2.49	Muir-Torre Syndrome	Skin diseases, Eye diseases, Gastrointestinal diseases, Cancer diseases, Rare diseases, Genetic diseases	10	1	MLH1	http://www.malacards.org/card/muir_torre_syndrome	Pathogenic, Molecular basis known, Causative germline mutation	MLH1			0.460812	0.0843287	0.17004	0.244691	0.0352061
1.5	Lipedema	Skin diseases, Cardiovascular diseases, Rare diseases, Fetal diseases	1	1	NSD1	http://www.malacards.org/card/lipedema					0.460669	0.322008	0.0515949	0.192099	0.0631116
1.5	Balanitis	Reproductive diseases	6	1	AKTIP	http://www.malacards.org/card/balanitis					0.460434	0.262908	0.252318	0.203051	0.176807
1.5	Thymus Gland Disease	Endocrine diseases, Immune diseases	6	1	AKTIP	http://www.malacards.org/card/thymus_gland_disease					0.460434	0.262908	0.252318	0.203051	0.176807
1.5	Balanitis Xerotica Obliterans	Reproductive diseases	7	1	AKTIP	http://www.malacards.org/card/balanitis_xerotica_obliterans					0.460434	0.262908	0.252318	0.203051	0.176807
1.5	Thymic Dysplasia	Immune diseases	5	1	AKTIP	http://www.malacards.org/card/thymic_dysplasia					0.460434	0.262908	0.252318	0.203051	0.176807
1.26	Renpenning Syndrome	Neuronal diseases, Mental diseases, Rare diseases, Fetal diseases, Genetic diseases	15	1	MB21D1	http://www.malacards.org/card/renpenning_syndrome					0.460374	0.168957	0.0837881	0.2951	0.0127984
1.46	Pigmented Villonodular Synovitis	Bone diseases, Reproductive diseases, Muscle diseases, Cancer diseases, Rare diseases	8	1	ANKLE2	http://www.malacards.org/card/pigmented_villonodular_synovitis					0.460316	0.309792	0.0911425	0.344316	0.078714
1.39	Folliculitis	Skin diseases	10	1	NR3C1	http://www.malacards.org/card/folliculitis					0.459893	0.303529	0.0424941	0.17292	0.0639251
1.72	Abdominal Obesity-Metabolic Syndrome 3	Genetic diseases, Metabolic diseases	197	3	IRS1, LPIN1, THBS2	http://www.malacards.org/card/abdominal_obesity_metabolic_syndrome_3			Adipose	IRS1, LPIN1, THBS2	0.459569	0.153956	0.125616	0.165445	0.138024
1.21	Endocarditis	Cardiovascular diseases	19	1	PIK3C2A	http://www.malacards.org/card/endocarditis					0.459522	0.203109	0.031707	0.248142	0.0955807
1.21	Dermatomyositis	Skin diseases, Neuronal diseases, Bone diseases, Nephrological diseases, Muscle diseases, Rare diseases	19	1	PIK3C2A	http://www.malacards.org/card/dermatomyositis					0.459522	0.203109	0.031707	0.248142	0.0955807
2.62	Polyhydramnios	Fetal diseases	13	2	AQP3, ZBTB42	http://www.malacards.org/card/polyhydramnios					0.459284	0.141459	0.083337	0.0748632	0.142148
1.29	Breast Giant Fibroadenoma	Cancer diseases	14	1	BRCA2	http://www.malacards.org/card/breast_giant_fibroadenoma					0.457971	0.302261	0.0654899	0.298597	0.147925
1.29	Clear Cell Adenofibroma	Cancer diseases	14	1	BRCA2	http://www.malacards.org/card/clear_cell_adenofibroma					0.457971	0.302261	0.0654899	0.298597	0.147925
1.31	Pericardial Tuberculosis	Cardiovascular diseases, Infectious diseases	13	1	TBP	http://www.malacards.org/card/pericardial_tuberculosis					0.45792	0.154777	0.14974	0.290321	0.0842572
1.31	Choreatic Disease	Neuronal diseases	13	1	TBP	http://www.malacards.org/card/choreatic_disease					0.45792	0.154777	0.14974	0.290321	0.0842572
1.32	Cisplatin Toxicity	Rare diseases	11	1	CAT	http://www.malacards.org/card/cisplatin_toxicity					0.457863	0.277007	0.171699	0.120876	0.196423
1.36	Macular Holes	Eye diseases	11	1	TGFB2	http://www.malacards.org/card/macular_holes					0.457497	0.235154	0.242931	0.242474	0.0887545
1.26	Fetal Alcohol Spectrum Disorder	Neuronal diseases, Rare diseases, Fetal diseases	16	1	ADNP	http://www.malacards.org/card/fetal_alcohol_spectrum_disorder					0.457173	0.230872	0.0598896	0.208928	0.0438886
1.2	Cervical Polyp	Reproductive diseases	20	1	PIK3C2A	http://www.malacards.org/card/cervical_polyp					0.457089	0.202033	0.0315391	0.246828	0.0950745
2.33	Familial Schizencephaly, Six3-Related	Neuronal diseases, Rare diseases, Fetal diseases, Genetic diseases	1	1	SIX3	http://www.malacards.org/card/familial_schizencephaly_six3_related	Genetic Tests	SIX3			0.456698	0.270365	0.0767253	0.217388	0.0854025
1.4	Hypercalcemia	Endocrine diseases, Nephrological diseases, Rare diseases, Genetic diseases, Metabolic diseases	15	1	GNA11	http://www.malacards.org/card/hypercalcemia					0.455963	0.242572	0.0574513	0.158219	0.103048
2.16	Cell Type Benign Neoplasm	Skin diseases, Respiratory diseases, Cancer diseases, Rare diseases, Genetic diseases	36	2	CTNNB1, MLH1	http://www.malacards.org/card/cell_type_benign_neoplasm					0.455663	0.188872	0.0842444	0.271575	0.0290257
1.35	Alopecia, Androgenetic, 1	Rare diseases	11	1	TGFB2	http://www.malacards.org/card/alopecia_androgenetic_1					0.455466	0.23411	0.241853	0.241397	0.0883605
1.17	Lupus Erythematosus	Skin diseases, Bone diseases, Immune diseases, Rare diseases, Genetic diseases	39	1	XRCC6	http://www.malacards.org/card/lupus_erythematosus					0.455156	0.242143	0.14656	0.241232	0.049612
1.14	Cornelia De Lange Syndrome	Eye diseases, Neuronal diseases, Bone diseases, Muscle diseases, Rare diseases, Fetal diseases, Genetic diseases	22	1	SOX2	http://www.malacards.org/card/cornelia_de_lange_syndrome					0.454909	0.337088	0.00627774	0.284773	0.0309338
1.27	Histiocytoma	Cancer diseases	15	1	MITF	http://www.malacards.org/card/histiocytoma					0.454834	0.261984	0.0859636	0.269716	0.115073
1.19	Malignant Hyperthermia	Neuronal diseases, Rare diseases, Genetic diseases	19	1	PIK3C2A	http://www.malacards.org/card/malignant_hyperthermia					0.454638	0.20095	0.03137	0.245505	0.0945648
1.19	Gastroenteritis	Gastrointestinal diseases	21	1	PIK3C2A	http://www.malacards.org/card/gastroenteritis					0.454638	0.20095	0.03137	0.245505	0.0945648
1.19	Myocarditis	Cardiovascular diseases, Rare diseases	21	1	PIK3C2A	http://www.malacards.org/card/myocarditis					0.454638	0.20095	0.03137	0.245505	0.0945648
1.13	Premature Ovarian Failure	Reproductive diseases, Rare diseases, Genetic diseases	25	1	PCMT1	http://www.malacards.org/card/premature_ovarian_failure					0.454428	0.197676	0.115879	0.147235	0.207219
2.12	Visceral Heterotaxy	Cardiovascular diseases, Rare diseases, Fetal diseases, Genetic diseases	35	2	CCDC40, PKD2	http://www.malacards.org/card/visceral_heterotaxy					0.45439	0.189481	0.070744	0.190844	0.0480063
1.39	Meningeal Melanocytoma	Neuronal diseases, Cancer diseases, Rare diseases	10	1	GNA11	http://www.malacards.org/card/meningeal_melanocytoma					0.454028	0.241543	0.0572075	0.157548	0.10261
1.36	Skin Atrophy	Skin diseases	11	1	NR3C1	http://www.malacards.org/card/skin_atrophy					0.453931	0.299594	0.0419432	0.170678	0.0630964
2.14	Adenoma	Cancer diseases	38	2	CTNNB1, MLH1	http://www.malacards.org/card/adenoma					0.45383	0.188112	0.0839054	0.270482	0.0289089
1.46	Marshall-Smith Syndrome	Bone diseases, Rare diseases, Fetal diseases, Genetic diseases	7	1	NSD1	http://www.malacards.org/card/marshall_smith_syndrome					0.453586	0.317056	0.0508016	0.189145	0.0621412
1.23	Separation Anxiety Disorder	Mental diseases	18	1	MB21D1	http://www.malacards.org/card/separation_anxiety_disorder					0.453439	0.166412	0.082526	0.290655	0.0126056
1.27	Acute Monocytic Leukemia	Immune diseases, Cancer diseases	15	1	MLLT10	http://www.malacards.org/card/acute_monocytic_leukemia					0.453379	0.153242	0.143721	0.237571	0.152789
2.66	Bronchiectasis	Respiratory diseases	73	2	CCDC40, DNAL1	http://www.malacards.org/card/bronchiectasis	Pathogenic	DNAL1			0.453358	0.170916	0.105859	0.152782	0.0472399
1.46	Tenosynovitis	Bone diseases, Muscle diseases	8	1	AKTIP	http://www.malacards.org/card/tenosynovitis					0.453354	0.258865	0.248438	0.199929	0.174088
1.42	Scurvy	Rare diseases, Genetic diseases, Metabolic diseases	8	1	ANKLE2	http://www.malacards.org/card/scurvy					0.452925	0.304819	0.0896792	0.338788	0.0774502
2.11	Muscular Dystrophy, Limb-Girdle, Type 2b	Neuronal diseases, Muscle diseases, Rare diseases, Genetic diseases, Metabolic diseases	185	3	HINT3, LPIN1, SGCB	http://www.malacards.org/card/muscular_dystrophy_limb_girdle_type_2b			Skeletal Muscle	HINT3, LPIN1	0.452887	0.154284	0.197912	0.115939	0.158662
1.35	Glycogen Storage Disease Ia	Endocrine diseases, Cardiovascular diseases, Liver diseases, Rare diseases, Genetic diseases, Metabolic diseases	10	1	AGL	http://www.malacards.org/card/glycogen_storage_disease_ia					0.452867	0.182053	0.020696	0.275343	0.0085592
1.26	Osteopetrosis	Eye diseases, Bone diseases, Rare diseases, Fetal diseases, Genetic diseases	14	1	MITF	http://www.malacards.org/card/osteopetrosis					0.452593	0.260693	0.08554	0.268387	0.114506
1.26	Cutaneous Leiomyosarcoma	Skin diseases, Cancer diseases	16	1	MITF	http://www.malacards.org/card/cutaneous_leiomyosarcoma					0.452593	0.260693	0.08554	0.268387	0.114506
2.58	Follicular Adenoma	Endocrine diseases, Cancer diseases	14	2	CDKN1B, SLC26A4	http://www.malacards.org/card/follicular_adenoma					0.452511	0.230781	0.0687816	0.195711	0.0708179
1.13	Embryonal Carcinoma	Cancer diseases, Rare diseases	28	1	SOX2	http://www.malacards.org/card/embryonal_carcinoma					0.452281	0.33514	0.00624147	0.283128	0.0307551
1.29	Lemierre's Syndrome	Cardiovascular diseases, Oral diseases, Blood diseases, Rare diseases, Infectious diseases	14	1	SLC25A16	http://www.malacards.org/card/lemierres_syndrome					0.452	0.268036	0.13786	0.347588	0.00362052
1.29	Vertebral Artery Occlusion	Cardiovascular diseases	14	1	SLC25A16	http://www.malacards.org/card/vertebral_artery_occlusion					0.452	0.268036	0.13786	0.347588	0.00362052
1.29	Graves' Disease	Endocrine diseases, Immune diseases, Rare diseases	24	1	SLC25A16	http://www.malacards.org/card/graves_disease					0.452	0.268036	0.13786	0.347588	0.00362052
1.41	Cavernous Malformation		9	1	KRIT1	http://www.malacards.org/card/cavernous_malformation					0.451985	0.238648	0.0795494	0.190738	0.115708
1.5	Perforated Corneal Ulcer	Eye diseases	4	1	PLAU	http://www.malacards.org/card/perforated_corneal_ulcer					0.451968	0.157285	0.117512	0.212877	0.0192086
1.5	Conjunctivochalasis	Eye diseases	6	1	PLAU	http://www.malacards.org/card/conjunctivochalasis					0.451968	0.157285	0.117512	0.212877	0.0192086
1.5	Intratubular Embryonal Carcinoma	Reproductive diseases, Cancer diseases	7	1	PLAU	http://www.malacards.org/card/intratubular_embryonal_carcinoma					0.451968	0.157285	0.117512	0.212877	0.0192086
1.5	Cornea Cancer	Neuronal diseases, Cancer diseases	5	1	PLAU	http://www.malacards.org/card/cornea_cancer					0.451968	0.157285	0.117512	0.212877	0.0192086
1.5	Endometrial Adenosquamous Carcinoma	Cancer diseases	3	1	PLAU	http://www.malacards.org/card/endometrial_adenosquamous_carcinoma					0.451968	0.157285	0.117512	0.212877	0.0192086
1.5	Angiostrongyliasis	Rare diseases, Infectious diseases	7	1	PLAU	http://www.malacards.org/card/angiostrongyliasis					0.451968	0.157285	0.117512	0.212877	0.0192086
1.5	Eosinophilic Meningitis	Neuronal diseases	7	1	PLAU	http://www.malacards.org/card/eosinophilic_meningitis					0.451968	0.157285	0.117512	0.212877	0.0192086
1.5	Ureter Cancer	Nephrological diseases, Cancer diseases	6	1	PLAU	http://www.malacards.org/card/ureter_cancer					0.451968	0.157285	0.117512	0.212877	0.0192086
1.29	Retinal Ischemia	Eye diseases	14	1	CAT	http://www.malacards.org/card/retinal_ischemia					0.451435	0.273118	0.169288	0.119179	0.193666
1.29	Microcytic Anemia	Blood diseases	14	1	CAT	http://www.malacards.org/card/microcytic_anemia					0.451435	0.273118	0.169288	0.119179	0.193666
1.29	Vitreous Syneresis	Eye diseases, Neuronal diseases	14	1	CAT	http://www.malacards.org/card/vitreous_syneresis					0.451435	0.273118	0.169288	0.119179	0.193666
1.33	Warthin Tumor	Immune diseases, Cancer diseases, Rare diseases	12	1	TGFB2	http://www.malacards.org/card/warthin_tumor					0.451362	0.232	0.239673	0.239222	0.0875643
1.26	Colloid Carcinoma of the Pancreas	Endocrine diseases, Cancer diseases	16	1	BRCA2	http://www.malacards.org/card/colloid_carcinoma_of_the_pancreas					0.451313	0.297867	0.0645377	0.294256	0.145774
2.83	Combined Immunodeficiency-Enteropathy Spectrum	Immune diseases, Gastrointestinal diseases, Blood diseases, Rare diseases, Fetal diseases	1	1	TTC7A	http://www.malacards.org/card/combined_immunodeficiency_enteropathy_spectrum	Causative germline mutation	TTC7A			0.4502	0.0416885	0.0232754	0.266519	0.0891396
2.83	Gastrointestinal Defects and Immunodeficiency Syndrome	Immune diseases, Gastrointestinal diseases, Blood diseases, Rare diseases, Fetal diseases, Genetic diseases	6	1	TTC7A	http://www.malacards.org/card/gastrointestinal_defects_and_immunodeficiency_syndrome	Pathogenic, Causative mutation Ð Humsavar, Genetic Tests, Molecular basis known, Causative germline mutation	TTC7A			0.4502	0.0416885	0.0232754	0.266519	0.0891396
1.5	Central Nervous System Leukemia	Neuronal diseases, Immune diseases, Cancer diseases	6	1	RUNX1T1	http://www.malacards.org/card/central_nervous_system_leukemia					0.450175	0.218335	0.0117045	0.186823	0.0526705
1.5	Orbital Cancer	Cancer diseases	7	1	RUNX1T1	http://www.malacards.org/card/orbital_cancer					0.450175	0.218335	0.0117045	0.186823	0.0526705
1.39	Stormorken Syndrome	Blood diseases, Rare diseases, Genetic diseases	9	1	STIM2	http://www.malacards.org/card/stormorken_syndrome					0.449957	0.256026	0.0494953	0.189432	0.0796424
2.33	Als2-Related Disorders	Genetic diseases	1	1	ALS2	http://www.malacards.org/card/als2_related_disorders	Genetic Tests	ALS2			0.449337	0.160863	0.255673	0.136149	0.124017
2.33	Mlh1-Related Lynch Syndrome	Gastrointestinal diseases, Cancer diseases, Rare diseases, Genetic diseases	1	1	MLH1	http://www.malacards.org/card/mlh1_related_lynch_syndrome	Genetic Tests	MLH1			0.449108	0.0821868	0.165721	0.238476	0.0343119
2.33	Mlh1-Related Muir-Torre Syndrome	Skin diseases, Eye diseases, Gastrointestinal diseases, Cancer diseases, Rare diseases, Genetic diseases	1	1	MLH1	http://www.malacards.org/card/mlh1_related_muir_torre_syndrome	Genetic Tests	MLH1			0.449108	0.0821868	0.165721	0.238476	0.0343119
2.33	Mlh1-Related Turcot Syndrome	Cancer diseases, Genetic diseases	1	1	MLH1	http://www.malacards.org/card/mlh1_related_turcot_syndrome	Genetic Tests	MLH1			0.449108	0.0821868	0.165721	0.238476	0.0343119
2.83	Epileptic Encephalopathy, Early Infantile, 23	Neuronal diseases, Mental diseases, Rare diseases, Genetic diseases	1	1	DOCK7	http://www.malacards.org/card/epileptic_encephalopathy_early_infantile_23	Pathogenic, Genetic Tests, Molecular basis known	DOCK7			0.449068	0.134271	0.0197141	0.266746	0.00687073
2.83	Early-Onset Epileptic Encephalopathy-Cortical Blindness-Intellectual Disability-Facial Dysmorphism Syndrome	Neuronal diseases, Rare diseases, Fetal diseases	1	1	DOCK7	http://www.malacards.org/card/early_onset_epileptic_encephalopathy_cortical_blindness_intellectual_disability_facial_dysmorphism_syndrome_2	Causative germline mutation	DOCK7			0.449068	0.134271	0.0197141	0.266746	0.00687073
1.44	Oliver Syndrome	Neuronal diseases, Bone diseases, Rare diseases, Fetal diseases	8	1	DLL4	http://www.malacards.org/card/oliver_syndrome					0.4489	0.294478	0.0632948	0.333532	0.0457878
1.39	Cavernous Hemangioma	Blood diseases	10	1	KRIT1	http://www.malacards.org/card/cavernous_hemangioma					0.448178	0.236638	0.0788794	0.189131	0.114734
1.39	Vascular Hemostatic Disease	Cardiovascular diseases, Blood diseases	10	1	KRIT1	http://www.malacards.org/card/vascular_hemostatic_disease					0.448178	0.236638	0.0788794	0.189131	0.114734
1.43	Weaver Syndrome	Skin diseases, Neuronal diseases, Rare diseases, Fetal diseases, Genetic diseases	7	1	NSD1	http://www.malacards.org/card/weaver_syndrome					0.448143	0.313252	0.050192	0.186876	0.0613956
1.36	Mccune-Albright Syndrome, Somatic, Mosaic	Skin diseases, Endocrine diseases, Bone diseases, Reproductive diseases, Cancer diseases, Rare diseases, Fetal diseases, Genetic diseases	10	1	GNA11	http://www.malacards.org/card/mccune_albright_syndrome_somatic_mosaic					0.448142	0.238411	0.0564658	0.155505	0.10128
1.5	Retinitis Pigmentosa 9	Eye diseases, Rare diseases, Genetic diseases	5	2	AMPH, LPIN1	http://www.malacards.org/card/retinitis_pigmentosa_9					0.447866	0.111071	0.03142	0.194374	0.0895731
1.33	Borderline Personality Disorder	Mental diseases	12	1	NR3C1	http://www.malacards.org/card/borderline_personality_disorder					0.447843	0.295577	0.0413807	0.168389	0.0622502
1.23	Essential Tremor	Neuronal diseases, Rare diseases, Genetic diseases	17	1	ANO3	http://www.malacards.org/card/essential_tremor					0.447165	0.195411	0.126548	0.112686	0.221347
1.27	Hemoglobin C Disease	Blood diseases, Rare diseases, Genetic diseases	14	1	CAT	http://www.malacards.org/card/hemoglobin_c_disease					0.447075	0.27048	0.167653	0.118028	0.191795
1.27	Hyperornithinemia-Hyperammonemia-Homocitrullinemia Syndrome	Rare diseases, Genetic diseases, Metabolic diseases	14	1	CAT	http://www.malacards.org/card/hyperornithinemia_hyperammonemia_homocitrullinemia_syndrome					0.447075	0.27048	0.167653	0.118028	0.191795
1.27	Pneumococcal Meningitis	Neuronal diseases, Rare diseases, Infectious diseases	15	1	CAT	http://www.malacards.org/card/pneumococcal_meningitis					0.447075	0.27048	0.167653	0.118028	0.191795
1.27	Adult Respiratory Distress Syndrome	Cardiovascular diseases, Respiratory diseases, Rare diseases	15	1	CAT	http://www.malacards.org/card/adult_respiratory_distress_syndrome					0.447075	0.27048	0.167653	0.118028	0.191795
1.27	Photokeratitis	Eye diseases	15	1	CAT	http://www.malacards.org/card/photokeratitis					0.447075	0.27048	0.167653	0.118028	0.191795
1.27	Prion Disease	Neuronal diseases, Mental diseases	15	1	CAT	http://www.malacards.org/card/prion_disease					0.447075	0.27048	0.167653	0.118028	0.191795
1.26	Dentatorubro-Pallidoluysian Atrophy	Neuronal diseases, Mental diseases, Rare diseases, Genetic diseases	14	1	TBP	http://www.malacards.org/card/dentatorubro_pallidoluysian_atrophy					0.447004	0.151087	0.14617	0.283401	0.0822488
1.24	Primary Peritoneal Carcinoma	Cancer diseases, Rare diseases	16	1	BRCA2	http://www.malacards.org/card/primary_peritoneal_carcinoma					0.446797	0.294886	0.0638919	0.291311	0.144315
1.24	Breast Carcinoma in Situ	Reproductive diseases, Cancer diseases, Rare diseases, Genetic diseases	17	1	BRCA2	http://www.malacards.org/card/breast_carcinoma_in_situ					0.446797	0.294886	0.0638919	0.291311	0.144315
1.24	Mutagen Sensitivity	Rare diseases	17	1	BRCA2	http://www.malacards.org/card/mutagen_sensitivity					0.446797	0.294886	0.0638919	0.291311	0.144315
1.5	Neutral Lipid Storage Disease	Metabolic diseases	7	1	ETFDH	http://www.malacards.org/card/neutral_lipid_storage_disease					0.446621	0.260826	0.0197406	0.270652	0.0620803
1.5	Isobutyryl-Coa Dehydrogenase Deficiency	Rare diseases, Genetic diseases, Metabolic diseases	2	1	ETFDH	http://www.malacards.org/card/isobutyryl_coa_dehydrogenase_deficiency					0.446621	0.260826	0.0197406	0.270652	0.0620803
1.5	Maternal Riboflavin Deficiency	Rare diseases, Metabolic diseases	3	1	ETFDH	http://www.malacards.org/card/maternal_riboflavin_deficiency					0.446621	0.260826	0.0197406	0.270652	0.0620803
1.42	Stiff-Person Syndrome	Endocrine diseases, Neuronal diseases, Rare diseases	9	1	AMPH	http://www.malacards.org/card/stiff_person_syndrome					0.446479	0.116977	0.000584887	0.170108	0.0575957
1.23	Basal Ganglia Disease	Neuronal diseases	18	1	SLC20A2	http://www.malacards.org/card/basal_ganglia_disease					0.446307	0.217351	0.0678386	0.371774	0.0235204
1.44	Ophthalmoplegia	Eye diseases, Neuronal diseases, Muscle diseases, Rare diseases, Genetic diseases, Metabolic diseases	13	1	RRM2B	http://www.malacards.org/card/ophthalmoplegia					0.446161	0.263235	0.221296	0.18828	0.168203
1.35	Chondrocalcinosis	Bone diseases, Rare diseases, Genetic diseases	11	1	GNA11	http://www.malacards.org/card/chondrocalcinosis					0.446152	0.237353	0.0562152	0.154815	0.10083
1.21	Colobomatous Microphthalmia	Eye diseases, Rare diseases, Fetal diseases	13	1	HMGB3	http://www.malacards.org/card/colobomatous_microphthalmia					0.446008	0.286337	0.0842955	0.269835	0.0441994
1.31	Cobblestone Lissencephaly	Genetic diseases	13	1	POMT2	http://www.malacards.org/card/cobblestone_lissencephaly					0.4457	0.235329	0.109196	0.197445	0.105185
1.26	Basilar Artery Occlusion	Cardiovascular diseases	16	1	SLC25A16	http://www.malacards.org/card/basilar_artery_occlusion					0.445429	0.264139	0.135856	0.342535	0.00356788
1.39	Carpenter Syndrome	Endocrine diseases, Bone diseases, Rare diseases, Fetal diseases, Genetic diseases	8	1	ZC4H2	http://www.malacards.org/card/carpenter_syndrome					0.445038	0.291055	0.100134	0.155763	0.123721
1.26	Wilson Disease	Eye diseases, Neuronal diseases, Gastrointestinal diseases, Liver diseases, Nephrological diseases, Rare diseases, Genetic diseases, Metabolic diseases	15	1	CAT	http://www.malacards.org/card/wilson_disease					0.444872	0.269147	0.166827	0.117446	0.19085
1.23	Ductal Carcinoma in Situ	Cancer diseases	18	1	BRCA2	http://www.malacards.org/card/ductal_carcinoma_in_situ					0.444515	0.29338	0.0635656	0.289824	0.143578
1.21	Diffuse Gastric Cancer	Gastrointestinal diseases, Cancer diseases, Rare diseases	19	1	HNRNPU	http://www.malacards.org/card/diffuse_gastric_cancer					0.444361	0.258618	0.0644323	0.215071	0.123532
1.83	Left Ventricular Noncompaction	Cardiovascular diseases, Rare diseases, Genetic diseases	38	1	DTNA	http://www.malacards.org/card/left_ventricular_noncompaction	Genetic Tests, Susceptibility factor	DTNA			0.444218	0.120827	0.0131933	0.199898	0.140817
1.31	Osteochondrosis	Bone diseases, Rare diseases	13	1	NR3C1	http://www.malacards.org/card/osteochondrosis					0.443714	0.292851	0.0409992	0.166837	0.0616763
3.17	Hydranencephaly	Neuronal diseases, Rare diseases, Fetal diseases	6	2	FLVCR2, SIX3	http://www.malacards.org/card/hydranencephaly					0.443675	0.171258	0.148853	0.163272	0.0836327
1.46	Allergic Bronchopulmonary Aspergillosis	Immune diseases, Respiratory diseases, Rare diseases, Infectious diseases	8	1	NPTN	http://www.malacards.org/card/allergic_bronchopulmonary_aspergillosis					0.443602	0.21426	0.110013	0.274146	0.13308
1.46	Lymphoid Leukemia	Immune diseases, Cancer diseases	8	1	RUNX1T1	http://www.malacards.org/card/lymphoid_leukemia					0.443253	0.214978	0.0115246	0.18395	0.0518606
1.29	Bowen Syndrome	Rare diseases	14	1	TGFB2	http://www.malacards.org/card/bowen_syndrome					0.442981	0.227692	0.235223	0.23478	0.0859383
1.24	Spinocerebellar Ataxia 12	Skin diseases, Eye diseases, Neuronal diseases, Ear diseases, Mental diseases, Rare diseases, Genetic diseases, Metabolic diseases	16	1	TBP	http://www.malacards.org/card/spinocerebellar_ataxia_12					0.442531	0.149575	0.144708	0.280565	0.0814257
1.39	Lesch-Nyhan Syndrome	Neuronal diseases, Mental diseases, Nephrological diseases, Blood diseases, Rare diseases, Genetic diseases, Metabolic diseases	9	1	RAPGEF4	http://www.malacards.org/card/lesch_nyhan_syndrome					0.442368	0.150847	0.141115	0.23357	0.176505
1.42	Bacteremia	Genetic diseases	9	1	CISH	http://www.malacards.org/card/bacteremia					0.442315	0.19108	0.026362	0.271582	0.0566164
1.42	Gangliosidosis Gm2	Eye diseases, Neuronal diseases, Bone diseases, Rare diseases, Genetic diseases, Metabolic diseases	9	1	MGEA5	http://www.malacards.org/card/gangliosidosis_gm2					0.442218	0.171138	0.0557195	0.244547	0.0138414
1.42	Gastric Cardia Carcinoma	Gastrointestinal diseases, Cancer diseases	9	1	MGEA5	http://www.malacards.org/card/gastric_cardia_carcinoma					0.442218	0.171138	0.0557195	0.244547	0.0138414
1.14	Pulmonary Edema	Respiratory diseases	26	1	PIK3C2A	http://www.malacards.org/card/pulmonary_edema					0.442128	0.19542	0.0305068	0.238749	0.0919625
1.14	Metabolic Acidosis	Metabolic diseases	26	1	PIK3C2A	http://www.malacards.org/card/metabolic_acidosis					0.442128	0.19542	0.0305068	0.238749	0.0919625
1.2	Acute Inflammation of Lacrimal Passage	Eye diseases	20	1	IFT122	http://www.malacards.org/card/acute_inflammation_of_lacrimal_passage					0.441801	0.284078	0.109567	0.237247	0.101172
1.2	Dacryocystitis	Eye diseases	20	1	IFT122	http://www.malacards.org/card/dacryocystitis					0.441801	0.284078	0.109567	0.237247	0.101172
2.15	Microform Holoprosencephaly	Neuronal diseases, Rare diseases, Fetal diseases	14	1	SIX3	http://www.malacards.org/card/microform_holoprosencephaly	Causative germline mutation	SIX3			0.441632	0.261446	0.0741941	0.210217	0.0825851
2.15	Midline Interhemispheric Variant of Holoprosencephaly	Neuronal diseases, Rare diseases, Fetal diseases	14	1	SIX3	http://www.malacards.org/card/midline_interhemispheric_variant_of_holoprosencephaly	Causative germline mutation	SIX3			0.441632	0.261446	0.0741941	0.210217	0.0825851
2.15	Septopreoptic Holoprosencephaly	Endocrine diseases, Neuronal diseases, Rare diseases, Fetal diseases	14	1	SIX3	http://www.malacards.org/card/septopreoptic_holoprosencephaly	Causative germline mutation	SIX3			0.441632	0.261446	0.0741941	0.210217	0.0825851
2.15	Semilobar Holoprosencephaly	Endocrine diseases, Neuronal diseases, Rare diseases, Fetal diseases	14	1	SIX3	http://www.malacards.org/card/semilobar_holoprosencephaly	Causative germline mutation	SIX3			0.441632	0.261446	0.0741941	0.210217	0.0825851
1.5	Exposure Keratitis	Eye diseases	6	1	MBD5	http://www.malacards.org/card/exposure_keratitis					0.44151	0.107728	0.0609283	0.205302	0.000100223
1.5	Paralytic Lagophthalmos	Eye diseases	2	1	MBD5	http://www.malacards.org/card/paralytic_lagophthalmos					0.44151	0.107728	0.0609283	0.205302	0.000100223
1.5	Lagophthalmos	Eye diseases	6	1	MBD5	http://www.malacards.org/card/lagophthalmos					0.44151	0.107728	0.0609283	0.205302	0.000100223
2.01	Gastrointestinal System Cancer	Gastrointestinal diseases, Cancer diseases	56	2	CTNNB1, MLH1	http://www.malacards.org/card/gastrointestinal_system_cancer					0.441271	0.182907	0.0815836	0.262998	0.028109
1.31	Cerebral Arterial Disease	Cardiovascular diseases	13	1	GUCY1A3	http://www.malacards.org/card/cerebral_arterial_disease					0.441121	0.243499	0.125719	0.188359	0.116015
1.39	Ganglioglioma	Neuronal diseases, Cancer diseases, Rare diseases	10	1	NSD1	http://www.malacards.org/card/ganglioglioma					0.440708	0.308055	0.0493592	0.183775	0.0603769
1.39	Tendinitis	Muscle diseases	10	1	AKTIP	http://www.malacards.org/card/tendinitis					0.440483	0.251516	0.241384	0.194253	0.169145
1.39	Thymic Hyperplasia	Endocrine diseases, Rare diseases	10	1	AKTIP	http://www.malacards.org/card/thymic_hyperplasia					0.440483	0.251516	0.241384	0.194253	0.169145
1.29	Holocarboxylase Synthetase Deficiency	Skin diseases, Rare diseases, Genetic diseases, Metabolic diseases	13	1	AGL	http://www.malacards.org/card/holocarboxylase_synthetase_deficiency					0.440453	0.177062	0.0201287	0.267795	0.00832456
1.24	Pneumoconiosis	Respiratory diseases	17	1	CAT	http://www.malacards.org/card/pneumoconiosis					0.44042	0.266454	0.165157	0.116271	0.18894
1.24	Fetal Valproate Syndrome	Rare diseases, Fetal diseases	17	1	CAT	http://www.malacards.org/card/fetal_valproate_syndrome					0.44042	0.266454	0.165157	0.116271	0.18894
1.35	Klippel-Trenaunay-Weber Syndrome	Skin diseases, Bone diseases, Cardiovascular diseases, Rare diseases, Fetal diseases, Genetic diseases	10	1	KRIT1	http://www.malacards.org/card/klippel_trenaunay_weber_syndrome					0.440404	0.232534	0.0775112	0.185851	0.112744
1.5	Pyomyositis	Bone diseases, Muscle diseases, Rare diseases, Infectious diseases	5	1	NONO	http://www.malacards.org/card/pyomyositis					0.44028	0.261086	0.100824	0.307756	0.0642809
1.23	Autosomal Dominant Cerebellar Ataxia	Neuronal diseases, Rare diseases, Genetic diseases	18	1	TBP	http://www.malacards.org/card/autosomal_dominant_cerebellar_ataxia					0.440271	0.148812	0.143969	0.279132	0.0810099
1.21	Congenital Hypoplastic Anemia	Immune diseases, Blood diseases, Rare diseases	18	1	BRCA2	http://www.malacards.org/card/congenital_hypoplastic_anemia					0.439904	0.290336	0.0629062	0.286817	0.142089
2.13	Alobar Holoprosencephaly	Endocrine diseases, Neuronal diseases, Rare diseases, Fetal diseases	16	1	SIX3	http://www.malacards.org/card/alobar_holoprosencephaly	Causative germline mutation	SIX3			0.439839	0.260384	0.0738929	0.209363	0.0822498
2.13	Lobar Holoprosencephaly	Endocrine diseases, Neuronal diseases, Rare diseases, Fetal diseases	16	1	SIX3	http://www.malacards.org/card/lobar_holoprosencephaly	Causative germline mutation	SIX3			0.439839	0.260384	0.0738929	0.209363	0.0822498
1.2	Malignant Triton Tumor	Neuronal diseases, Cancer diseases, Rare diseases	20	1	MITF	http://www.malacards.org/card/malignant_triton_tumor					0.438815	0.252757	0.082936	0.260217	0.11102
1.2	Reticulohistiocytic Granuloma	Immune diseases, Rare diseases	20	1	MITF	http://www.malacards.org/card/reticulohistiocytic_granuloma					0.438815	0.252757	0.082936	0.260217	0.11102
1.27	Vitreous Disease	Eye diseases	15	1	TGFB2	http://www.malacards.org/card/vitreous_disease					0.438702	0.225493	0.232951	0.232512	0.0851082
1.11	Ataxia-Telangiectasia	Skin diseases, Endocrine diseases, Eye diseases, Neuronal diseases, Immune diseases, Reproductive diseases, Blood diseases, Cancer diseases, Rare diseases, Fetal diseases, Genetic diseases	28	1	ATR	http://www.malacards.org/card/ataxia_telangiectasia_2					0.438444	0.214399	0.0600669	0.312172	0.0583131
1.2	Pre-Malignant Neoplasm	Eye diseases, Oral diseases, Cancer diseases, Genetic diseases	20	1	BRCA2	http://www.malacards.org/card/pre_malignant_neoplasm					0.437574	0.288799	0.0625731	0.285298	0.141336
1.28	Liddle Syndrome	Cardiovascular diseases, Nephrological diseases, Rare diseases, Genetic diseases	13	1	NR3C1	http://www.malacards.org/card/liddle_syndrome					0.437412	0.288692	0.0404169	0.164467	0.0608003
1.08	Hemochromatosis	Liver diseases, Rare diseases, Genetic diseases, Metabolic diseases	33	1	IREB2	http://www.malacards.org/card/hemochromatosis					0.437103	0.203253	0.173967	0.310781	0.0799899
1.19	Hypophosphatemic Rickets with Hypercalciuria	Endocrine diseases, Bone diseases, Nephrological diseases, Rare diseases, Fetal diseases, Genetic diseases	20	1	SLC20A2	http://www.malacards.org/card/hypophosphatemic_rickets_with_hypercalciuria					0.436982	0.21281	0.0664213	0.364006	0.023029
1.29	Hemiplegia	Neuronal diseases, Rare diseases	14	1	GUCY1A3	http://www.malacards.org/card/hemiplegia					0.436958	0.241201	0.124533	0.186581	0.11492
1.29	Thrombasthenia	Blood diseases, Rare diseases	14	1	GTF3A	http://www.malacards.org/card/thrombasthenia					0.436602	0.197344	0.212625	0.235328	0.13753
1.22	Hyperphenylalaninemia	Neuronal diseases, Rare diseases, Genetic diseases, Metabolic diseases	18	1	CAT	http://www.malacards.org/card/hyperphenylalaninemia					0.435906	0.263723	0.163465	0.115079	0.187004
1.27	Ocular Hypertension	Eye diseases	15	1	NR3C1	http://www.malacards.org/card/ocular_hypertension					0.435282	0.287286	0.0402201	0.163666	0.0605042
1.5	Hypopyon	Eye diseases	7	1	LPIN1	http://www.malacards.org/card/hypopyon					0.434881	0.101762	0.0604485	0.211787	0.117853
2.6	Lymphoma, Malt, Somatic	Immune diseases, Blood diseases, Cancer diseases, Rare diseases, Genetic diseases	28	2	BCL2, BIRC3	http://www.malacards.org/card/lymphoma_malt_somatic	Gene fusion	BIRC3			0.434556	0.0339823	0.161438	0.157114	0.080067
1.11	Pneumonia	Respiratory diseases	30	1	PIK3C2A	http://www.malacards.org/card/pneumonia					0.43441	0.192009	0.0299743	0.234582	0.0903574
1.27	Pinguecula	Eye diseases	15	1	XPO4	http://www.malacards.org/card/pinguecula					0.434165	0.115488	0.0337346	0.268314	0.0551389
1.27	Conjunctival Degeneration	Eye diseases	15	1	XPO4	http://www.malacards.org/card/conjunctival_degeneration					0.434165	0.115488	0.0337346	0.268314	0.0551389
1.26	Glycogen Storage Disease	Endocrine diseases, Cardiovascular diseases, Liver diseases, Rare diseases, Genetic diseases, Metabolic diseases	15	1	AGL	http://www.malacards.org/card/glycogen_storage_disease					0.43405	0.174488	0.0198361	0.263902	0.00820354
1.46	Intracranial Abscess	Neuronal diseases	8	1	BIN1	http://www.malacards.org/card/intracranial_abscess					0.433954	0.20526	0.0520744	0.084621	0.223052
1.41	Rhizomelic Chondrodysplasia Punctata	Eye diseases, Neuronal diseases, Bone diseases, Rare diseases, Fetal diseases, Genetic diseases, Metabolic diseases	8	1	PEX26	http://www.malacards.org/card/rhizomelic_chondrodysplasia_punctata					0.433932	0.237795	0.0525058	0.307658	0.0624863
1.24	Anaplastic Large Cell Lymphoma	Immune diseases, Blood diseases, Cancer diseases, Rare diseases	17	1	PPID	http://www.malacards.org/card/anaplastic_large_cell_lymphoma					0.43347	0.23364	0.0375819	0.306897	0.00680548
1.93	Spastic Cerebral Palsy	Neuronal diseases	99	2	FLT1, SIX3	http://www.malacards.org/card/spastic_cerebral_palsy			Skeletal Muscle	FLT1	0.433405	0.246391	0.0490831	0.256793	0.0827804
1.26	Cushing's Syndrome	Endocrine diseases, Reproductive diseases, Cancer diseases, Rare diseases, Genetic diseases	25	1	NR3C1	http://www.malacards.org/card/cushings_syndrome					0.433137	0.285871	0.0400219	0.16286	0.0602061
1.26	Adrenal Gland Hyperfunction	Endocrine diseases, Rare diseases	15	1	NR3C1	http://www.malacards.org/card/adrenal_gland_hyperfunction					0.433137	0.285871	0.0400219	0.16286	0.0602061
1.26	Adrenal Cortex Disease	Endocrine diseases	16	1	NR3C1	http://www.malacards.org/card/adrenal_cortex_disease					0.433137	0.285871	0.0400219	0.16286	0.0602061
1.26	Adrenal Gland Disease	Endocrine diseases	16	1	NR3C1	http://www.malacards.org/card/adrenal_gland_disease					0.433137	0.285871	0.0400219	0.16286	0.0602061
1.99	Chondromyxoid Fibroma	Bone diseases, Cancer diseases, Rare diseases	7	1	GRM1	http://www.malacards.org/card/chondromyxoid_fibroma	Gene fusion	GRM1			0.432413	0.095131	0.0254692	0.16475	0.0479979
1.5	Hemangioma of Spleen	Immune diseases, Cancer diseases	5	1	TBL1XR1	http://www.malacards.org/card/hemangioma_of_spleen					0.432378	0.218351	0.0248185	0.164303	0.143549
1.24	Mitral Valve Disease	Cardiovascular diseases	17	1	TGFB2	http://www.malacards.org/card/mitral_valve_disease					0.432172	0.222136	0.229483	0.229051	0.0838414
1.46	Choledochal Cyst	Gastrointestinal diseases	8	1	WDR19	http://www.malacards.org/card/choledochal_cyst					0.431252	0.281176	0.0231151	0.178538	0.0560628
1.23	Patent Ductus Arteriosus	Cardiovascular diseases, Rare diseases, Genetic diseases	18	1	EVC	http://www.malacards.org/card/patent_ductus_arteriosus					0.430235	0.220711	0.0916401	0.277502	0.0316223
1.33	Ehrlichiosis	Blood diseases, Rare diseases, Infectious diseases	12	1	APOPT1	http://www.malacards.org/card/ehrlichiosis					0.430037	0.266623	0.0190076	0.22577	0.0188786
1.23	Diabetic Foot Ulcers	Bone diseases, Immune diseases	18	1	TGFB2	http://www.malacards.org/card/diabetic_foot_ulcers					0.429965	0.221002	0.228311	0.227881	0.0834132
1.23	Aortic Disease	Cardiovascular diseases	18	1	TGFB2	http://www.malacards.org/card/aortic_disease					0.429965	0.221002	0.228311	0.227881	0.0834132
1.39	Neonatal Leukemia	Immune diseases, Cancer diseases	10	1	AFF1	http://www.malacards.org/card/neonatal_leukemia					0.429419	0.250781	0.0631246	0.275687	0.11809
1.13	Aicardi-Goutieres Syndrome	Neuronal diseases, Immune diseases, Blood diseases, Rare diseases, Genetic diseases	21	1	MB21D1	http://www.malacards.org/card/aicardi_goutieres_syndrome					0.429254	0.157536	0.0781243	0.275152	0.0119333
1.33	Macroglossia	Gastrointestinal diseases, Rare diseases, Fetal diseases	12	1	NSD1	http://www.malacards.org/card/macroglossia					0.429161	0.299983	0.048066	0.17896	0.058795
1.46	Nephronophthisis 1, Juvenile	Nephrological diseases, Rare diseases, Genetic diseases	7	1	AHI1	http://www.malacards.org/card/nephronophthisis_1_juvenile					0.429102	0.171641	0.0909697	0.181081	0.096548
1.4	Carnitine Palmitoyltransferase Ii Deficiency	Neuronal diseases, Rare diseases, Genetic diseases, Metabolic diseases	9	1	ETFDH	http://www.malacards.org/card/carnitine_palmitoyltransferase_ii_deficiency					0.429089	0.250588	0.0189657	0.260028	0.0596433
1.24	Post-Traumatic Stress Disorder	Neuronal diseases, Mental diseases	17	1	NR3C1	http://www.malacards.org/card/post_traumatic_stress_disorder					0.428803	0.28301	0.0396214	0.16123	0.0596036
1.18	Cerebellar Ataxia	Neuronal diseases, Rare diseases, Genetic diseases	21	1	TBP	http://www.malacards.org/card/cerebellar_ataxia					0.428733	0.144912	0.140196	0.271817	0.0788869
1.29	Hemidystonia	Neuronal diseases	14	1	KRIT1	http://www.malacards.org/card/hemidystonia					0.428332	0.226159	0.0753864	0.180756	0.109653
1.16	Bloom Syndrome	Skin diseases, Eye diseases, Blood diseases, Cancer diseases, Rare diseases, Fetal diseases, Genetic diseases	21	1	BRCA2	http://www.malacards.org/card/bloom_syndrome					0.428092	0.282541	0.0612171	0.279116	0.138274
1.26	Appendix Adenocarcinoma	Gastrointestinal diseases, Cancer diseases, Rare diseases	16	1	ACRC	http://www.malacards.org/card/appendix_adenocarcinoma					0.427939	0.228947	0.0766011	0.216109	0.070182
1.22	Keratosis, Seborrheic, Somatic	Skin diseases, Rare diseases, Genetic diseases	16	1	TGFB2	http://www.malacards.org/card/keratosis_seborrheic_somatic					0.427743	0.21986	0.227131	0.226704	0.0829821
1.19	Adult T-Cell Leukemia	Skin diseases, Immune diseases, Blood diseases, Cancer diseases, Rare diseases	21	1	EPC1	http://www.malacards.org/card/adult_t_cell_leukemia					0.427544	0.235577	0.0297998	0.362557	0.0837986
1.24	Nodular Nonsuppurative Panniculitis	Skin diseases, Muscle diseases, Rare diseases	17	1	IRS1	http://www.malacards.org/card/nodular_nonsuppurative_panniculitis					0.427344	0.134186	0.132904	0.173074	0.171365
1.39	Carnitine Deficiency, Systemic Primary	Neuronal diseases, Nephrological diseases, Rare diseases, Genetic diseases, Metabolic diseases	8	1	ETFDH	http://www.malacards.org/card/carnitine_deficiency_systemic_primary					0.427268	0.249524	0.0188852	0.258924	0.0593902
1.31	Sporadic Pheochromocytoma	Endocrine diseases, Cancer diseases, Rare diseases, Genetic diseases	12	1	TATDN1	http://www.malacards.org/card/sporadic_pheochromocytoma					0.426903	0.171188	0.196376	0.198937	0.110995
1.36	Femoral Neuropathy	Neuronal diseases	11	1	PLAU	http://www.malacards.org/card/femoral_neuropathy					0.426778	0.148519	0.110962	0.201012	0.0181381
1.36	Neurologic Diseases	Neuronal diseases	11	1	PLAU	http://www.malacards.org/card/neurologic_diseases					0.426778	0.148519	0.110962	0.201012	0.0181381
1.23	Pituitary Adenoma, Acth-Secreting	Endocrine diseases, Cancer diseases, Genetic diseases	14	1	NR3C1	http://www.malacards.org/card/pituitary_adenoma_acth_secreting					0.426613	0.281565	0.039419	0.160406	0.0592992
1.08	Muscle Tissue Disease	Muscle diseases	35	1	PIK3C2A	http://www.malacards.org/card/muscle_tissue_disease					0.426531	0.188527	0.0294306	0.230327	0.0887185
1.5	Adult Dermatomyositis	Skin diseases, Neuronal diseases, Bone diseases, Nephrological diseases, Muscle diseases, Rare diseases	6	1	MLH3	http://www.malacards.org/card/adult_dermatomyositis					0.426277	0.119358	0.295837	0.127031	0.208876
1.5	Colorectal Cancer 7	Gastrointestinal diseases, Cancer diseases, Rare diseases, Genetic diseases	2	1	MLH3	http://www.malacards.org/card/colorectal_cancer_7					0.426277	0.119358	0.295837	0.127031	0.208876
2.83	Ciliary Dyskinesia, Primary, 15	Respiratory diseases, Rare diseases, Genetic diseases	1	1	CCDC40	http://www.malacards.org/card/ciliary_dyskinesia_primary_15	Pathogenic, Molecular basis known	CCDC40			0.425938	0.18145	0.131189	0.0928545	0.0847617
1.5	Familial Isolated Pituitary Adenoma	Endocrine diseases, Gastrointestinal diseases, Cancer diseases, Rare diseases, Genetic diseases	3	1	CDKN1B	http://www.malacards.org/card/familial_isolated_pituitary_adenoma					0.425832	0.255499	0.0528031	0.150744	0.0817597
1.5	Multiple Endocrine Neoplasia	Endocrine diseases, Neuronal diseases, Gastrointestinal diseases, Cancer diseases, Rare diseases, Genetic diseases	11	1	CDKN1B	http://www.malacards.org/card/multiple_endocrine_neoplasia					0.425832	0.255499	0.0528031	0.150744	0.0817597
1.15	Pancreas Adenocarcinoma	Endocrine diseases, Cancer diseases	25	1	BRCA2	http://www.malacards.org/card/pancreas_adenocarcinoma					0.42568	0.280949	0.0608722	0.277543	0.137495
2.83	Warsaw Breakage Syndrome	Cancer diseases, Rare diseases, Fetal diseases, Genetic diseases	1	1	DDX11	http://www.malacards.org/card/warsaw_breakage_syndrome	Pathogenic, Causative mutation Ð Humsavar, Molecular basis known, Causative germline mutation	DDX11			0.42548	0.250182	0.00417821	0.206358	0.104243
1.36	Lepromatous Leprosy	Infectious diseases	11	1	IL12B	http://www.malacards.org/card/lepromatous_leprosy					0.425058	0.187876	0.10754	0.208278	0.0726849
1.5	Platelet Storage Pool Deficiency	Blood diseases, Rare diseases	7	1	HPS3	http://www.malacards.org/card/platelet_storage_pool_deficiency					0.424822	0.109179	0.15421	0.183948	0.0751935
1.39	Rectum Adenocarcinoma	Cancer diseases	10	1	ZXDC	http://www.malacards.org/card/rectum_adenocarcinoma					0.424792	0.122765	0.119791	0.307974	0.0768873
2.16	Cardiomyopathy, Familial Hypertrophic	Cardiovascular diseases, Rare diseases, Genetic diseases, Metabolic diseases	17	1	MYLK	http://www.malacards.org/card/cardiomyopathy_familial_hypertrophic	Molecular basis known	MYLK			0.424768	0.129979	0.0139324	0.278223	0.098971
1.31	Amyotrophic Lateral Sclerosis Type 14	Neuronal diseases, Mental diseases, Rare diseases, Genetic diseases	12	1	GABARAPL2	http://www.malacards.org/card/amyotrophic_lateral_sclerosis_type_14					0.42469	0.181767	0.126982	0.198755	0.0692244
1.14	Integumentary System Cancer	Skin diseases, Cancer diseases	27	1	MITF	http://www.malacards.org/card/integumentary_system_cancer					0.424452	0.244484	0.0802213	0.2517	0.107386
1.2	Skeletal Muscle Cancer	Bone diseases, Cancer diseases	20	1	MEF2A	http://www.malacards.org/card/skeletal_muscle_cancer					0.424359	0.24825	0.0700193	0.180353	0.0657757
1.17	Acne	Skin diseases	23	1	CAT	http://www.malacards.org/card/acne					0.424343	0.256728	0.159129	0.112027	0.182043
1.24	Central Nervous System Melanocytic Neoplasm	Neuronal diseases, Cancer diseases	17	1	GNA11	http://www.malacards.org/card/central_nervous_system_melanocytic_neoplasm					0.423334	0.225214	0.0533401	0.146897	0.0956735
1.14	Ovary Epithelial Cancer	Cancer diseases	27	1	BRCA2	http://www.malacards.org/card/ovary_epithelial_cancer					0.423251	0.279346	0.060525	0.27596	0.13671
1.14	Malignant Ovarian Surface Epithelial-Stromal Neoplasm	Cancer diseases	27	1	BRCA2	http://www.malacards.org/card/malignant_ovarian_surface_epithelial_stromal_neoplasm					0.423251	0.279346	0.060525	0.27596	0.13671
1.21	Carbohydrate Metabolic Disorder	Metabolic diseases	19	1	AGL	http://www.malacards.org/card/carbohydrate_metabolic_disorder					0.423077	0.170077	0.0193346	0.257231	0.00799615
1.5	Spinocerebellar Ataxia Type 16	Skin diseases, Eye diseases, Neuronal diseases, Ear diseases, Mental diseases, Rare diseases, Genetic diseases, Metabolic diseases	4	1	CNTN4	http://www.malacards.org/card/spinocerebellar_ataxia_type_16					0.422825	0.147143	0.0545445	0.30528	0.0443967
1.39	Lacrimal Duct Obstruction	Eye diseases	10	1	MBD5	http://www.malacards.org/card/lacrimal_duct_obstruction					0.422379	0.10306	0.0582882	0.196406	9.58799e-05
1.21	Chronic Fatigue Syndrome	Neuronal diseases, Immune diseases, Rare diseases	19	1	NR3C1	http://www.malacards.org/card/chronic_fatigue_syndrome					0.422187	0.278644	0.0390101	0.158742	0.0586841
1.36	Communicating Hydrocephalus	Neuronal diseases, Rare diseases, Fetal diseases	11	1	FRMD4A	http://www.malacards.org/card/communicating_hydrocephalus					0.421772	0.105443	0.00894157	0.259812	0.0569392
1.5	Sporotrichosis	Rare diseases, Infectious diseases	6	1	CALM1	http://www.malacards.org/card/sporotrichosis					0.421308	0.189589	0.0863681	0.178213	0.115017
1.5	Acute Dacryocystitis	Eye diseases	3	1	CALM1	http://www.malacards.org/card/acute_dacryocystitis					0.421308	0.189589	0.0863681	0.178213	0.115017
1.5	External Ear Disease	Ear diseases	6	1	CALM1	http://www.malacards.org/card/external_ear_disease					0.421308	0.189589	0.0863681	0.178213	0.115017
1.5	Hemolytic Anemia Due to Triosephosphate Isomerase Deficiency	Neuronal diseases, Blood diseases, Rare diseases, Genetic diseases, Metabolic diseases	5	1	CALM1	http://www.malacards.org/card/hemolytic_anemia_due_to_triosephosphate_isomerase_deficiency					0.421308	0.189589	0.0863681	0.178213	0.115017
1.5	Otitis Externa	Ear diseases	6	1	CALM1	http://www.malacards.org/card/otitis_externa					0.421308	0.189589	0.0863681	0.178213	0.115017
1.5	Otomycosis	Skin diseases, Ear diseases	6	1	CALM1	http://www.malacards.org/card/otomycosis					0.421308	0.189589	0.0863681	0.178213	0.115017
1.39	Syndromic Intellectual Disability	Fetal diseases	10	1	NONO	http://www.malacards.org/card/syndromic_intellectual_disability					0.421202	0.249773	0.0964553	0.29442	0.0614955
1.19	Vitreoretinopathy, Neovascular Inflammatory	Eye diseases, Rare diseases, Genetic diseases	19	1	TGFB2	http://www.malacards.org/card/vitreoretinopathy_neovascular_inflammatory					0.420982	0.216385	0.223542	0.223121	0.0816705
1.29	Geographic Tongue	Oral diseases, Gastrointestinal diseases, Rare diseases	14	1	AKTIP	http://www.malacards.org/card/geographic_tongue					0.420977	0.240378	0.230695	0.185651	0.161655
1.34	Chondrodysplasia Punctata	Bone diseases, Rare diseases, Fetal diseases, Genetic diseases	11	1	PEX26	http://www.malacards.org/card/chondrodysplasia_punctata					0.420916	0.230662	0.0509308	0.298429	0.0606118
1.2	Fructose-1,6-Bisphosphatase Deficiency	Rare diseases, Genetic diseases, Metabolic diseases	19	1	AGL	http://www.malacards.org/card/fructose_16_bisphosphatase_deficiency					0.420836	0.169176	0.0192322	0.255868	0.0079538
1.13	Pancreatitis, Hereditary	Endocrine diseases, Bone diseases, Immune diseases, Gastrointestinal diseases, Rare diseases, Genetic diseases	25	1	BRCA2	http://www.malacards.org/card/pancreatitis_hereditary					0.420806	0.277732	0.0601752	0.274365	0.13592
0.94	Myelodysplastic Syndrome	Immune diseases, Blood diseases, Rare diseases, Genetic diseases	75	1	BMI1	http://www.malacards.org/card/myelodysplastic_syndrome					0.42063	0.154371	0.115253	0.262053	0.124507
2.83	Multiple Synostoses Syndrome 3	Bone diseases, Ear diseases, Rare diseases, Fetal diseases, Genetic diseases	1	1	FGF9	http://www.malacards.org/card/multiple_synostoses_syndrome_3	Pathogenic, Causative mutation Ð Humsavar, Genetic Tests	FGF9			0.420344	0.154686	0.130727	0.106767	0.100042
1.5	Mandibular Cancer	Bone diseases, Oral diseases, Cancer diseases	5	1	ST7	http://www.malacards.org/card/mandibular_cancer					0.420195	0.209677	0.228586	0.206736	0.0886612
1.57	Lethal Congenital Contracture Syndrome	Respiratory diseases, Rare diseases, Fetal diseases, Genetic diseases	9	1	ZBTB42	http://www.malacards.org/card/lethal_congenital_contracture_syndrome					0.420048	0.139036	0.118454	0.125174	0.0705681
1.46	Hypervitaminosis a	Metabolic diseases	8	1	CDKN1B	http://www.malacards.org/card/hypervitaminosis_a					0.419284	0.25157	0.0519912	0.148427	0.0805025
1.46	Endocervical Adenocarcinoma	Cancer diseases	8	1	CDKN1B	http://www.malacards.org/card/endocervical_adenocarcinoma					0.419284	0.25157	0.0519912	0.148427	0.0805025
1.18	Juvenile Glaucoma	Eye diseases, Rare diseases, Fetal diseases, Genetic diseases	20	1	TGFB2	http://www.malacards.org/card/juvenile_glaucoma					0.418697	0.21521	0.222328	0.22191	0.0812273
2.83	Methylmalonic Aciduria, Vitamin B12-Responsive	Genetic diseases	1	1	MMAA	http://www.malacards.org/card/methylmalonic_aciduria_vitamin_b12_responsive	Pathogenic, Causative mutation Ð Humsavar, Molecular basis known	MMAA			0.418312	0.127585	0.111271	0.16356	0.0665117
1.24	Multifocal Dystonia	Neuronal diseases	17	1	KRIT1	http://www.malacards.org/card/multifocal_dystonia					0.41788	0.220641	0.0735469	0.176345	0.106977
1.29	Tay-Sachs Disease	Eye diseases, Neuronal diseases, Rare diseases, Genetic diseases, Metabolic diseases	12	1	MGEA5	http://www.malacards.org/card/tay_sachs_disease					0.417336	0.161509	0.0525844	0.230787	0.0130626
1.27	Paraneoplastic Syndromes		15	1	AMPH	http://www.malacards.org/card/paraneoplastic_syndromes					0.417287	0.109329	0.000546646	0.158986	0.0538301
1.14	Chronic Granulomatous Disease	Skin diseases, Eye diseases, Immune diseases, Gastrointestinal diseases, Respiratory diseases, Blood diseases, Rare diseases, Genetic diseases	22	1	CAT	http://www.malacards.org/card/chronic_granulomatous_disease					0.417211	0.252412	0.156454	0.110144	0.178983
1.24	Xeroderma Pigmentosum, Group C	Skin diseases, Eye diseases, Neuronal diseases, Ear diseases, Cancer diseases, Rare diseases, Fetal diseases, Genetic diseases	16	1	UVRAG	http://www.malacards.org/card/xeroderma_pigmentosum_group_c					0.417125	0.162679	0.125555	0.314512	0.090099
1.24	Smallpox	Skin diseases, Rare diseases, Infectious diseases	17	1	ANKLE2	http://www.malacards.org/card/smallpox					0.417011	0.280649	0.0825683	0.311925	0.071309
1.36	Polyposis, Juvenile Intestinal	Gastrointestinal diseases, Cancer diseases, Rare diseases, Genetic diseases	9	1	JPH1	http://www.malacards.org/card/polyposis_juvenile_intestinal					0.416844	0.232599	0.0729476	0.200919	0.0213424
1.19	Gestational Diabetes	Metabolic diseases	21	1	IRS1	http://www.malacards.org/card/gestational_diabetes					0.416279	0.130711	0.129463	0.168593	0.166928
2.58	Muscular Dystrophy, Limb-Girdle, Type 2e	Neuronal diseases, Muscle diseases, Rare diseases, Genetic diseases, Metabolic diseases	9	1	SGCB	http://www.malacards.org/card/muscular_dystrophy_limb_girdle_type_2e	Pathogenic, Causative mutation Ð Humsavar, Molecular basis known, Causative germline mutation	SGCB			0.416184	0.129017	0.190196	0.0457802	0.157734
1.36	Dental Abscess	Oral diseases	11	1	BIN1	http://www.malacards.org/card/dental_abscess					0.416167	0.196847	0.04994	0.0811525	0.21391
1.31	Acute Erythroid Leukemia	Blood diseases, Cancer diseases, Rare diseases	12	1	NPTN	http://www.malacards.org/card/acute_erythroid_leukemia					0.415844	0.200853	0.103129	0.256992	0.124753
1.04	Ischemia	Cardiovascular diseases	45	1	PIK3C2A	http://www.malacards.org/card/ischemia					0.415767	0.183769	0.0286879	0.224514	0.0864796
1.23	Venous Malformations, Multiple Cutaneous and Mucosal	Cardiovascular diseases, Rare diseases, Fetal diseases, Genetic diseases	17	1	KRIT1	http://www.malacards.org/card/venous_malformations_multiple_cutaneous_and_mucosal					0.415746	0.219514	0.0731713	0.175445	0.106431
1.3	Paraplegia	Neuronal diseases, Rare diseases	21	1	ZFYVE26	http://www.malacards.org/card/paraplegia					0.415633	0.129262	0.0423946	0.275149	0.0381551
1.18	Hypokalemia	Metabolic diseases	22	1	NR3C1	http://www.malacards.org/card/hypokalemia					0.415433	0.274186	0.038386	0.156203	0.0577452
1.18	Endogenous Depression	Mental diseases	22	1	NR3C1	http://www.malacards.org/card/endogenous_depression					0.415433	0.274186	0.038386	0.156203	0.0577452
1.34	Spinocerebellar Ataxia 11	Skin diseases, Eye diseases, Neuronal diseases, Ear diseases, Mental diseases, Rare diseases, Genetic diseases, Metabolic diseases	11	1	SYT14	http://www.malacards.org/card/spinocerebellar_ataxia_11					0.41532	0.171112	0.0146608	0.26622	0.00884631
1.19	Achalasia	Cardiovascular diseases, Gastrointestinal diseases, Rare diseases	18	1	GUCY1A3	http://www.malacards.org/card/achalasia					0.415259	0.229223	0.118349	0.177315	0.109213
1.46	Spontaneous Ocular Nystagmus	Eye diseases, Neuronal diseases	8	1	CALM1	http://www.malacards.org/card/spontaneous_ocular_nystagmus					0.41483	0.186673	0.0850401	0.175473	0.113249
1.13	Peripheral Neuropathy	Neuronal diseases, Rare diseases	27	1	CAT	http://www.malacards.org/card/peripheral_neuropathy					0.4148	0.250954	0.15555	0.109507	0.177949
1.13	Toxic Encephalopathy	Neuronal diseases, Rare diseases	28	1	CAT	http://www.malacards.org/card/toxic_encephalopathy					0.4148	0.250954	0.15555	0.109507	0.177949
1.5	Amyotrophic Lateral Sclerosis Type 15	Neuronal diseases, Mental diseases, Rare diseases, Genetic diseases	1	1	VTA1	http://www.malacards.org/card/amyotrophic_lateral_sclerosis_type_15					0.414478	0.247858	0.169522	0.0654875	0.208897
1.1	Parasitic Protozoa Infectious Disease	Cancer diseases, Infectious diseases	33	1	MCF2	http://www.malacards.org/card/parasitic_protozoa_infectious_disease					0.41423	0.138767	0.0741472	0.20463	0.135453
1.5	Enhanced S-Cone Syndrome	Genetic diseases	6	1	GRK7	http://www.malacards.org/card/enhanced_s_cone_syndrome					0.414133	0.14826	0.0658471	0.133765	0.146603
1.16	Hereditary Hemorrhagic Telangiectasia	Skin diseases, Eye diseases, Neuronal diseases, Bone diseases, Cardiovascular diseases, Rare diseases, Fetal diseases, Genetic diseases	20	1	TGFB2	http://www.malacards.org/card/hereditary_hemorrhagic_telangiectasia					0.41408	0.212837	0.219876	0.219462	0.0803315
1.16	Corneal Disease	Eye diseases	24	1	TGFB2	http://www.malacards.org/card/corneal_disease					0.41408	0.212837	0.219876	0.219462	0.0803315
1.16	Open-Angle Glaucoma	Eye diseases, Rare diseases, Fetal diseases, Genetic diseases	24	1	TGFB2	http://www.malacards.org/card/open_angle_glaucoma					0.41408	0.212837	0.219876	0.219462	0.0803315
1.29	Paroxysmal Nocturnal Hemoglobinuria	Immune diseases, Nephrological diseases, Blood diseases, Rare diseases, Genetic diseases, Metabolic diseases	13	1	PLAU	http://www.malacards.org/card/paroxysmal_nocturnal_hemoglobinuria					0.413236	0.143806	0.107441	0.194634	0.0175625
1.29	Paranasal Sinus Disease	Respiratory diseases	14	1	PLAU	http://www.malacards.org/card/paranasal_sinus_disease					0.413236	0.143806	0.107441	0.194634	0.0175625
1.17	Mental Depression	Neuronal diseases, Mental diseases	23	1	NR3C1	http://www.malacards.org/card/mental_depression					0.41315	0.272679	0.0381751	0.155344	0.0574279
1.42	Primary Effusion Lymphoma	Immune diseases, Blood diseases, Cancer diseases, Rare diseases	9	1	CDKN1B	http://www.malacards.org/card/primary_effusion_lymphoma					0.412552	0.247531	0.0511565	0.146044	0.0792101
1.12	Merrf Syndrome	Eye diseases, Neuronal diseases, Muscle diseases, Rare diseases, Genetic diseases, Metabolic diseases	22	1	CAT	http://www.malacards.org/card/merrf_syndrome					0.412373	0.249485	0.15464	0.108866	0.176908
1.31	Riboflavin Deficiency	Genetic diseases, Metabolic diseases	12	1	ETFDH	http://www.malacards.org/card/riboflavin_deficiency					0.412237	0.240746	0.0182209	0.249816	0.0573009
1.17	Glucose Intolerance	Metabolic diseases	23	1	IRS1	http://www.malacards.org/card/glucose_intolerance					0.411744	0.129288	0.128052	0.166756	0.165109
1.17	Liver Disease	Gastrointestinal diseases, Liver diseases, Rare diseases, Genetic diseases, Metabolic diseases	41	1	IRS1	http://www.malacards.org/card/liver_disease					0.411744	0.129288	0.128052	0.166756	0.165109
1.42	Hermansky-Pudlak Syndrome	Skin diseases, Eye diseases, Blood diseases, Rare diseases, Genetic diseases, Metabolic diseases	13	1	HPS3	http://www.malacards.org/card/hermansky_pudlak_syndrome					0.411574	0.105775	0.149401	0.178212	0.0728486
2.07	Autistic Disorder	Mental diseases, Fetal diseases, Genetic diseases	45	2	GLO1, NLGN4X	http://www.malacards.org/card/autistic_disorder					0.411226	0.133854	0.0755505	0.152565	0.0896474
1.2	Opportunistic Mycosis	Infectious diseases	20	1	SUGCT	http://www.malacards.org/card/opportunistic_mycosis					0.411089	0.195267	0.143881	0.296806	0.113872
1.24	Paraneoplastic Cerebellar Degeneration	Rare diseases	17	1	AMPH	http://www.malacards.org/card/paraneoplastic_cerebellar_degeneration					0.411076	0.107702	0.00053851	0.15662	0.0530288
1.2	Myopathy, Tubular Aggregate, 1	Neuronal diseases, Muscle diseases, Rare diseases, Genetic diseases	18	1	STIM2	http://www.malacards.org/card/myopathy_tubular_aggregate_1					0.410879	0.23379	0.0451967	0.17298	0.0727256
1.23	Bronchus Cancer	Respiratory diseases, Cancer diseases	18	1	CEP70	http://www.malacards.org/card/bronchus_cancer					0.410705	0.1803	0.10473	0.239852	0.0653021
1.36	Sjogren-Larsson Syndrome	Skin diseases, Eye diseases, Neuronal diseases, Immune diseases, Mental diseases, Rare diseases, Genetic diseases, Metabolic diseases	9	1	LPIN1	http://www.malacards.org/card/sjogren_larsson_syndrome					0.410644	0.0960906	0.0570795	0.199983	0.111284
1.16	Insulin-Like Growth Factor I	Neuronal diseases, Ear diseases, Mental diseases, Rare diseases, Genetic diseases	23	1	IRS1	http://www.malacards.org/card/insulin_like_growth_factor_i					0.409453	0.128568	0.12734	0.165829	0.164191
1.16	Endocrine Pancreas Disease	Endocrine diseases	24	1	IRS1	http://www.malacards.org/card/endocrine_pancreas_disease					0.409453	0.128568	0.12734	0.165829	0.164191
1.5	Intraocular Lymphoma	Eye diseases, Neuronal diseases, Immune diseases, Blood diseases, Cancer diseases, Rare diseases	7	1	BCL2	http://www.malacards.org/card/intraocular_lymphoma					0.409211	0.0173506	0.0937094	0.270489	0.0218928
1.5	Lymphoma, Small Cleaved-Cell, Diffuse	Immune diseases, Rare diseases	2	1	BCL2	http://www.malacards.org/card/lymphoma_small_cleaved_cell_diffuse					0.409211	0.0173506	0.0937094	0.270489	0.0218928
1.5	Extramedullary Plasmacytoma	Immune diseases, Blood diseases, Cancer diseases	7	1	BCL2	http://www.malacards.org/card/extramedullary_plasmacytoma					0.409211	0.0173506	0.0937094	0.270489	0.0218928
1.5	Benign Mammary Dysplasia	Reproductive diseases, Cancer diseases	2	1	BCL2	http://www.malacards.org/card/benign_mammary_dysplasia					0.409211	0.0173506	0.0937094	0.270489	0.0218928
1.5	Primary Central Nervous System Lymphoma	Neuronal diseases, Immune diseases, Blood diseases, Cancer diseases, Rare diseases	7	1	BCL2	http://www.malacards.org/card/primary_central_nervous_system_lymphoma					0.409211	0.0173506	0.0937094	0.270489	0.0218928
1.5	Lymphoma, Small Cleaved-Cell, Follicular	Immune diseases, Rare diseases	1	1	BCL2	http://www.malacards.org/card/lymphoma_small_cleaved_cell_follicular					0.409211	0.0173506	0.0937094	0.270489	0.0218928
1.5	Glomangiosarcoma	Cardiovascular diseases, Cancer diseases	5	1	BCL2	http://www.malacards.org/card/glomangiosarcoma					0.409211	0.0173506	0.0937094	0.270489	0.0218928
1.48	Left Ventricular Outflow Tract Obstruction	Genetic diseases	7	1	TAB2	http://www.malacards.org/card/left_ventricular_outflow_tract_obstruction_lvoto					0.408819	0.273909	0.0903491	0.183969	0.00944373
1.15	Rhinitis	Respiratory diseases, Smell/Taste diseases	25	1	NR3C1	http://www.malacards.org/card/rhinitis					0.408537	0.269634	0.0377488	0.15361	0.0567866
1.42	Adolescent Idiopathic Scoliosis	Rare diseases	9	1	CALM1	http://www.malacards.org/card/adolescent_idiopathic_scoliosis					0.40817	0.183676	0.0836748	0.172656	0.11143
1.1	Alcohol Abuse	Mental diseases, Rare diseases, Genetic diseases	31	1	CAT	http://www.malacards.org/card/alcohol_abuse					0.407467	0.246518	0.1528	0.107571	0.174803
1.39	Spindle Cell Sarcoma	Cancer diseases	9	1	CDKN1B	http://www.malacards.org/card/spindle_cell_sarcoma					0.40738	0.244428	0.0505151	0.144212	0.0782169
1.5	Adjustment Disorder	Mental diseases	6	1	KIAA1217	http://www.malacards.org/card/adjustment_disorder					0.406689	0.146815	0.0459558	0.18667	0.0343652
2.19	Thyroid Cancer	Endocrine diseases, Cancer diseases, Genetic diseases	32	2	CTNNB1, SLC26A4	http://www.malacards.org/card/thyroid_cancer					0.406613	0.216725	0.0367509	0.238275	0.0349688
2.32	Sensorineural Hearing Loss	Ear diseases	24	2	SERPINB6, SLC26A4	http://www.malacards.org/card/sensorineural_hearing_loss					0.406254	0.196221	0.10197	0.216533	0.0457036
1.38	Multiple Endocrine Neoplasia 1	Endocrine diseases, Neuronal diseases, Gastrointestinal diseases, Cancer diseases, Rare diseases, Genetic diseases	26	1	CDKN1B	http://www.malacards.org/card/multiple_endocrine_neoplasia_1	Candidate gene tested	CDKN1B			0.405632	0.243379	0.0502983	0.143594	0.0778813
1.79	Isolated Atp Synthase Deficiency	Rare diseases, Metabolic diseases	5	1	ATPAF1	http://www.malacards.org/card/isolated_atp_synthase_deficiency	Candidate gene tested	ATPAF1			0.405307	0.157664	0.106596	0.226161	0.0522846
1.5	Dysembryoplastic Neuroepithelial Tumor	Neuronal diseases, Cancer diseases, Rare diseases	7	1	KIAA1549	http://www.malacards.org/card/dysembryoplastic_neuroepithelial_tumor					0.404915	0.16885	0.0647864	0.118235	0.080983
1.5	Cerebellar Astrocytoma	Neuronal diseases, Cancer diseases	5	1	KIAA1549	http://www.malacards.org/card/cerebellar_astrocytoma					0.404915	0.16885	0.0647864	0.118235	0.080983
1.5	Cerebellum Cancer	Neuronal diseases, Cancer diseases	7	1	KIAA1549	http://www.malacards.org/card/cerebellum_cancer					0.404915	0.16885	0.0647864	0.118235	0.080983
1.5	Pilocytic Astrocytoma of Cerebellum	Neuronal diseases, Cancer diseases	7	1	KIAA1549	http://www.malacards.org/card/pilocytic_astrocytoma_of_cerebellum					0.404915	0.16885	0.0647864	0.118235	0.080983
1.14	Fatty Liver Disease	Gastrointestinal diseases, Liver diseases, Metabolic diseases	27	1	IRS1	http://www.malacards.org/card/fatty_liver_disease					0.404824	0.127115	0.1259	0.163954	0.162334
1.38	Oculocutaneous Albinism	Skin diseases, Eye diseases, Rare diseases, Genetic diseases, Metabolic diseases	10	1	HPS3	http://www.malacards.org/card/oculocutaneous_albinism					0.40467	0.104	0.146895	0.175222	0.0716265
2.05	Congenital Stationary Night Blindness	Eye diseases, Rare diseases, Genetic diseases	39	2	CACNA1D, RPGR	http://www.malacards.org/card/congenital_stationary_night_blindness					0.404169	0.110843	0.058847	0.11921	0.103467
1.5	Acid Sphingomyelinase Deficiency	Genetic diseases	3	1	NPC1	http://www.malacards.org/card/acid_sphingomyelinase_deficiency					0.404165	0.110337	0.134991	0.259878	0.0509248
1.42	Ganglioneuroblastoma	Neuronal diseases, Cancer diseases, Rare diseases	9	1	WASF3	http://www.malacards.org/card/ganglioneuroblastoma					0.403979	0.196334	0.0739281	0.12281	0.026097
1.42	Trichomoniasis	Infectious diseases	9	1	WASF3	http://www.malacards.org/card/trichomoniasis					0.403979	0.196334	0.0739281	0.12281	0.026097
2.26	Fuchs' Endothelial Dystrophy	Eye diseases, Rare diseases, Genetic diseases	23	2	BCL2, PRDX3	http://www.malacards.org/card/fuchs_endothelial_dystrophy					0.403442	0.0428455	0.168437	0.179935	0.0497242
1.46	Small Cell Neuroendocrine Carcinoma	Neuronal diseases, Respiratory diseases, Cancer diseases	8	1	BCL2	http://www.malacards.org/card/small_cell_neuroendocrine_carcinoma					0.402919	0.0170838	0.0922685	0.26633	0.0215562
1.46	Alk-Negative Anaplastic Large Cell Lymphoma	Immune diseases, Blood diseases, Cancer diseases, Rare diseases	8	1	BCL2	http://www.malacards.org/card/alk_negative_anaplastic_large_cell_lymphoma					0.402919	0.0170838	0.0922685	0.26633	0.0215562
1.07	Epilepsy, Generalized, with Febrile Seizures Plus, Type 5	Neuronal diseases, Rare diseases, Genetic diseases	32	1	KCNA1	http://www.malacards.org/card/epilepsy_generalized_with_febrile_seizures_plus_type_5					0.402806	0.248128	0.0608237	0.155483	0.0853948
1.2	Thymus Cancer	Immune diseases, Cancer diseases, Rare diseases, Genetic diseases	20	1	AMPH	http://www.malacards.org/card/thymus_cancer					0.402591	0.105479	0.000527394	0.153387	0.0519342
1.3	Nephronophthisis	Nephrological diseases, Rare diseases, Genetic diseases	20	1	WDR19	http://www.malacards.org/card/nephronophthisis					0.402367	0.262343	0.0215669	0.16658	0.0523077
2.83	Mitochondrial Complex Iii Deficiency, Nuclear Type 1	Genetic diseases, Metabolic diseases	2	1	UQCRB	http://www.malacards.org/card/mitochondrial_complex_iii_deficiency_nuclear_type_1	Pathogenic	UQCRB			0.402114	0.201861	0.0410156	0.277459	0.0747932
2.83	Mitochondrial Complex Iii Deficiency, Nuclear Type 3	Genetic diseases, Metabolic diseases	2	1	UQCRB	http://www.malacards.org/card/mitochondrial_complex_iii_deficiency_nuclear_type_3	Molecular basis known	UQCRB			0.402114	0.201861	0.0410156	0.277459	0.0747932
1.39	Jaw Cancer	Bone diseases, Oral diseases, Cancer diseases	10	1	ST7	http://www.malacards.org/card/jaw_cancer					0.401988	0.200592	0.218681	0.197778	0.0848194
1.12	Acute Lymphocytic Leukemia	Immune diseases, Blood diseases, Cancer diseases, Rare diseases, Genetic diseases	29	1	NR3C1	http://www.malacards.org/card/acute_lymphocytic_leukemia					0.401496	0.264987	0.0370982	0.150962	0.0558079
1.23	Alzheimer Disease-2	Neuronal diseases, Mental diseases, Rare diseases, Genetic diseases	14	1	PLAU	http://www.malacards.org/card/alzheimer_disease_2					0.401094	0.139581	0.104284	0.188915	0.0170465
1.21	Severe Congenital Neutropenia	Blood diseases, Cancer diseases, Rare diseases, Genetic diseases	17	1	CISH	http://www.malacards.org/card/severe_congenital_neutropenia					0.40096	0.173215	0.0238972	0.246189	0.0513229
1.27	Cystic Kidney Disease	Nephrological diseases	15	1	PKD2	http://www.malacards.org/card/cystic_kidney_disease					0.400762	0.163511	0.00135458	0.249274	0.00492937
2.33	Beta-Sarcoglycanopathy	Muscle diseases, Rare diseases, Genetic diseases	1	1	SGCB	http://www.malacards.org/card/beta_sarcoglycanopathy	Genetic Tests	SGCB			0.40037	0.124115	0.182969	0.0440407	0.15174
1.5	Renal Cell Carcinoma 4	Nephrological diseases, Cancer diseases, Rare diseases, Genetic diseases	1	1	DIRC2	http://www.malacards.org/card/renal_cell_carcinoma_4					0.399816	0.0839614	0.165924	0.176719	0.0307459
1.5	Familial Renal Cell Carcinoma	Nephrological diseases, Cancer diseases, Rare diseases, Genetic diseases	5	1	DIRC2	http://www.malacards.org/card/familial_renal_cell_carcinoma					0.399816	0.0839614	0.165924	0.176719	0.0307459
1.5	Male Reproductive Organ Benign Neoplasm	Cancer diseases	6	1	DIRC2	http://www.malacards.org/card/male_reproductive_organ_benign_neoplasm					0.399816	0.0839614	0.165924	0.176719	0.0307459
1.23	Allergic Encephalomyelitis	Immune diseases, Rare diseases	18	1	IL12B	http://www.malacards.org/card/allergic_encephalomyelitis					0.399478	0.176569	0.101068	0.195744	0.0683107
1.17	Neuropathy, Congenital Hypomyelinating	Neuronal diseases, Muscle diseases, Rare diseases, Genetic diseases	19	1	GDAP1	http://www.malacards.org/card/neuropathy_congenital_hypomyelinating					0.399177	0.195996	0.139313	0.181625	0.12135
1.11	Mood Disorder	Mental diseases	31	1	NR3C1	http://www.malacards.org/card/mood_disorder					0.399116	0.263416	0.0368783	0.150068	0.0554771
1.22	Ollier Disease	Bone diseases, Cancer diseases, Rare diseases, Fetal diseases	16	1	PLAU	http://www.malacards.org/card/ollier_disease					0.399021	0.138859	0.103745	0.187939	0.0169584
1.24	Scapuloperoneal Myopathy	Muscle diseases	17	1	SLC9A7	http://www.malacards.org/card/scapuloperoneal_myopathy					0.398961	0.205465	0.0817869	0.240174	0.025334
1.26	Polycystic Liver Disease	Liver diseases, Rare diseases, Genetic diseases	13	1	PKD2	http://www.malacards.org/card/polycystic_liver_disease					0.398787	0.162705	0.0013479	0.248046	0.00490508
1.89	Corneal Dystrophy	Eye diseases, Genetic diseases	17	1	CYP4V2	http://www.malacards.org/card/corneal_dystrophy	Genetic Tests	CYP4V2			0.398707	0.13277	0.192177	0.165464	0.0354451
1.46	Mixed Glioma	Neuronal diseases, Cancer diseases	8	1	KIAA1549	http://www.malacards.org/card/mixed_glioma					0.398689	0.166253	0.0637902	0.116417	0.0797378
1.29	Anterior Horn Cell Disease	Neuronal diseases	14	1	AHI1	http://www.malacards.org/card/anterior_horn_cell_disease					0.398457	0.159383	0.0844728	0.168149	0.0896528
1.5	Chanarin-Dorfman Syndrome	Skin diseases, Eye diseases, Neuronal diseases, Rare diseases, Genetic diseases, Metabolic diseases	5	1	CHKA	http://www.malacards.org/card/chanarin_dorfman_syndrome					0.398191	0.142552	0.0334082	0.0792399	0.0246878
1.46	Sandhoff Disease, Infantile, Juvenile, and Adult Forms	Eye diseases, Neuronal diseases, Rare diseases, Genetic diseases, Metabolic diseases	7	1	NPC1	http://www.malacards.org/card/sandhoff_disease_infantile_juvenile_and_adult_forms					0.397951	0.10864	0.132915	0.255882	0.0501418
1.36	Gestational Choriocarcinoma	Reproductive diseases, Cancer diseases, Rare diseases, Fetal diseases	11	1	CALM1	http://www.malacards.org/card/gestational_choriocarcinoma					0.397827	0.179022	0.0815545	0.168281	0.108607
1.17	Bruxism	Mental diseases, Oral diseases	23	1	CEP70	http://www.malacards.org/card/bruxism					0.397745	0.17461	0.101425	0.232283	0.0632414
1.1	Hypoglycemia	Endocrine diseases, Metabolic diseases	31	1	AGL	http://www.malacards.org/card/hypoglycemia					0.397555	0.159817	0.0181683	0.241713	0.00751379
2.33	Primary Ciliary Dyskinesia15: Ccdc40-Related Primary Ciliary Dyskinesia	Genetic diseases	1	1	CCDC40	http://www.malacards.org/card/primary_ciliary_dyskinesia15_ccdc40_related_primary_ciliary_dyskinesia	Genetic Tests	CCDC40			0.397066	0.16915	0.122296	0.0865604	0.0790162
1.5	Goblet Cell Carcinoid	Endocrine diseases, Gastrointestinal diseases, Cancer diseases, Rare diseases	5	1	CTNNB1	http://www.malacards.org/card/goblet_cell_carcinoid					0.396542	0.256166	0.000303751	0.262114	0.0202236
1.5	Gallbladder Adenoma	Gastrointestinal diseases, Cancer diseases	5	1	CTNNB1	http://www.malacards.org/card/gallbladder_adenoma					0.396542	0.256166	0.000303751	0.262114	0.0202236
1.5	Osteoporosis-Pseudoglioma Syndrome	Eye diseases, Neuronal diseases, Bone diseases, Rare diseases, Fetal diseases, Genetic diseases	6	1	CTNNB1	http://www.malacards.org/card/osteoporosis_pseudoglioma_syndrome					0.396542	0.256166	0.000303751	0.262114	0.0202236
1.5	Pulmonary Sclerosing Hemangioma	Respiratory diseases, Cancer diseases	7	1	CTNNB1	http://www.malacards.org/card/pulmonary_sclerosing_hemangioma					0.396542	0.256166	0.000303751	0.262114	0.0202236
1.5	Juxtacortical Chondroma	Cancer diseases	6	1	CTNNB1	http://www.malacards.org/card/juxtacortical_chondroma					0.396542	0.256166	0.000303751	0.262114	0.0202236
1.5	Frozen Shoulder		6	1	CTNNB1	http://www.malacards.org/card/frozen_shoulder					0.396542	0.256166	0.000303751	0.262114	0.0202236
1.5	Skin Pilomatrix Carcinoma	Skin diseases, Cancer diseases	6	1	CTNNB1	http://www.malacards.org/card/skin_pilomatrix_carcinoma					0.396542	0.256166	0.000303751	0.262114	0.0202236
1.5	Carcinoid Tumors, Intestinal	Gastrointestinal diseases, Cancer diseases, Genetic diseases	5	1	CTNNB1	http://www.malacards.org/card/carcinoid_tumors_intestinal					0.396542	0.256166	0.000303751	0.262114	0.0202236
1.5	Female Reproductive Endometrioid Cancer	Cancer diseases	6	1	CTNNB1	http://www.malacards.org/card/female_reproductive_endometrioid_cancer					0.396542	0.256166	0.000303751	0.262114	0.0202236
1.5	Lung Acinar Adenocarcinoma	Respiratory diseases, Cancer diseases	3	1	CTNNB1	http://www.malacards.org/card/lung_acinar_adenocarcinoma					0.396542	0.256166	0.000303751	0.262114	0.0202236
1.5	Nodular Medulloblastoma	Neuronal diseases, Cancer diseases	7	1	CTNNB1	http://www.malacards.org/card/nodular_medulloblastoma					0.396542	0.256166	0.000303751	0.262114	0.0202236
1.5	Classic Pulmonary Blastoma	Respiratory diseases, Cancer diseases	1	1	CTNNB1	http://www.malacards.org/card/classic_pulmonary_blastoma					0.396542	0.256166	0.000303751	0.262114	0.0202236
1.5	Parkinson Disease 8	Neuronal diseases, Mental diseases, Rare diseases, Genetic diseases, Metabolic diseases	6	1	CTNNB1	http://www.malacards.org/card/parkinson_disease_8_2					0.396542	0.256166	0.000303751	0.262114	0.0202236
1.03	Melanoma	Skin diseases, Cancer diseases	45	1	MITF	http://www.malacards.org/card/melanoma					0.396516	0.228393	0.0749416	0.235134	0.100319
1.03	Hirschsprung Disease 1	Gastrointestinal diseases, Rare diseases, Fetal diseases, Genetic diseases	41	1	MITF	http://www.malacards.org/card/hirschsprung_disease_1					0.396516	0.228393	0.0749416	0.235134	0.100319
1.42	Benign Metastasizing Leiomyoma	Cancer diseases, Rare diseases	9	1	BCL2	http://www.malacards.org/card/benign_metastasizing_leiomyoma					0.39645	0.0168095	0.0907872	0.262054	0.0212101
1.42	Malignant Teratoma	Cancer diseases, Rare diseases	9	1	BCL2	http://www.malacards.org/card/malignant_teratoma					0.39645	0.0168095	0.0907872	0.262054	0.0212101
1.45	Niemann-Pick Disease	Eye diseases, Neuronal diseases, Immune diseases, Respiratory diseases, Rare diseases, Genetic diseases, Metabolic diseases	12	1	NPC1	http://www.malacards.org/card/niemann_pick_disease					0.39637	0.108209	0.132388	0.254866	0.0499426
2.83	Primary Aldosteronism, Seizures, and Neurologic Abnormalities	Neuronal diseases, Genetic diseases	1	1	CACNA1D	http://www.malacards.org/card/primary_aldosteronism_seizures_and_neurologic_abnormalities	Pathogenic, Causative mutation Ð Humsavar, Molecular basis known	CACNA1D			0.396363	0.0243763	0.0218792	0.00749126	0.115342
2.83	Aldosterone-Producing Adenoma with Seizures and Neurological Abnormalities	Endocrine diseases, Neuronal diseases, Rare diseases	1	1	CACNA1D	http://www.malacards.org/card/aldosterone_producing_adenoma_with_seizures_and_neurological_abnormalities	Causative germline mutation	CACNA1D			0.396363	0.0243763	0.0218792	0.00749126	0.115342
2.83	Sinoatrial Node Dysfunction and Deafness	Ear diseases, Rare diseases, Genetic diseases	1	1	CACNA1D	http://www.malacards.org/card/sinoatrial_node_dysfunction_and_deafness	Pathogenic, Molecular basis known, Causative germline mutation	CACNA1D			0.396363	0.0243763	0.0218792	0.00749126	0.115342
1.1	Hyperglycemia	Metabolic diseases	33	1	IRS1	http://www.malacards.org/card/hyperglycemia					0.395369	0.124146	0.12296	0.160125	0.158543
1.67	Estrogen Resistance	Endocrine diseases, Reproductive diseases, Rare diseases, Genetic diseases	5	1	BCAR3	http://www.malacards.org/card/estrogen_resistance					0.395319	0.0877609	0.0184219	0.302814	0.0845983
1.08	Glioblastoma	Neuronal diseases, Cancer diseases, Rare diseases, Genetic diseases	34	1	TGFB2	http://www.malacards.org/card/glioblastoma					0.394956	0.203007	0.209721	0.209327	0.0766214
1.08	Glaucoma 1, Open Angle, E	Eye diseases, Genetic diseases	33	1	TGFB2	http://www.malacards.org/card/glaucoma_1_open_angle_e					0.394956	0.203007	0.209721	0.209327	0.0766214
1.15	Charcot-Marie-Tooth Disease, Type 2e	Neuronal diseases, Ear diseases, Muscle diseases, Rare diseases, Fetal diseases, Genetic diseases, Metabolic diseases	19	1	GDAP1	http://www.malacards.org/card/charcot_marie_tooth_disease_type_2e_2					0.394719	0.193807	0.137757	0.179597	0.119995
1.15	Neuropathy	Neuronal diseases, Immune diseases, Rare diseases	42	1	GDAP1	http://www.malacards.org/card/neuropathy					0.394719	0.193807	0.137757	0.179597	0.119995
1.23	Clopidogrel Resistance	Rare diseases, Metabolic diseases	16	1	P2RY1	http://www.malacards.org/card/clopidogrel_resistance					0.394379	0.182992	0.135666	0.231106	0.0232289
1.43	Pilocytic Astrocytoma	Neuronal diseases, Cancer diseases, Rare diseases	34	1	KIAA1549	http://www.malacards.org/card/pilocytic_astrocytoma	Gene fusion	KIAA1549			0.393905	0.164258	0.0630248	0.11502	0.078781
1.5	Isolated Corpus Callosum Agenesis	Rare diseases	1	1	ARX	http://www.malacards.org/card/isolated_corpus_callosum_agenesis					0.393496	0.171564	0.0680749	0.233737	0.005627
1.5	Lissencephaly, X-Linked	Reproductive diseases, Rare diseases, Genetic diseases	4	1	ARX	http://www.malacards.org/card/lissencephaly_x_linked_3					0.393496	0.171564	0.0680749	0.233737	0.005627
1.5	Lissencephaly with Cerebellar Hypoplasia	Neuronal diseases, Rare diseases, Fetal diseases, Genetic diseases	5	1	ARX	http://www.malacards.org/card/lissencephaly_with_cerebellar_hypoplasia					0.393496	0.171564	0.0680749	0.233737	0.005627
1.5	Congenital Cytomegalovirus	Rare diseases	6	1	RNASET2	http://www.malacards.org/card/congenital_cytomegalovirus					0.393226	0.274079	0.0491533	0.200545	0.0205657
1.31	Urinary Bladder Urothelial Carcinoma	Nephrological diseases, Cancer diseases	13	1	CDKN1B	http://www.malacards.org/card/urinary_bladder_urothelial_carcinoma					0.393048	0.235829	0.048738	0.139139	0.0754653
1.19	Bile Duct Carcinoma	Gastrointestinal diseases, Liver diseases, Cancer diseases, Rare diseases	21	1	PLAU	http://www.malacards.org/card/bile_duct_carcinoma					0.392714	0.136665	0.102106	0.184968	0.0166904
1.26	Apraxia	Rare diseases, Fetal diseases	15	1	AHI1	http://www.malacards.org/card/apraxia					0.392664	0.157066	0.0832447	0.165704	0.0883494
1.14	Rhabdomyosarcoma	Neuronal diseases, Cancer diseases, Rare diseases	26	1	FOXO3	http://www.malacards.org/card/rhabdomyosarcoma					0.392581	0.165669	0.0143292	0.198646	0.0663462
1.39	Oculopharyngeal Muscular Dystrophy	Eye diseases, Neuronal diseases, Muscle diseases, Rare diseases, Genetic diseases	9	1	BCL2	http://www.malacards.org/card/oculopharyngeal_muscular_dystrophy					0.39148	0.0165987	0.0896488	0.258768	0.0209442
1.39	Cortical Thymoma	Immune diseases, Blood diseases, Cancer diseases	10	1	BCL2	http://www.malacards.org/card/cortical_thymoma					0.39148	0.0165987	0.0896488	0.258768	0.0209442
1.39	Cervical Carcinosarcoma	Cancer diseases	10	1	BCL2	http://www.malacards.org/card/cervical_carcinosarcoma					0.39148	0.0165987	0.0896488	0.258768	0.0209442
1.5	Angiokeratoma Circumscriptum	Cancer diseases	6	1	FLT1	http://www.malacards.org/card/angiokeratoma_circumscriptum					0.391195	0.213201	0.0228849	0.277357	0.076283
1.5	Glomeruloid Hemangioma	Cancer diseases	6	1	FLT1	http://www.malacards.org/card/glomeruloid_hemangioma					0.391195	0.213201	0.0228849	0.277357	0.076283
1.5	Cerebral Angioma	Cancer diseases	2	1	FLT1	http://www.malacards.org/card/cerebral_angioma					0.391195	0.213201	0.0228849	0.277357	0.076283
1.5	Brain Angioma	Neuronal diseases, Cancer diseases	2	1	FLT1	http://www.malacards.org/card/brain_angioma					0.391195	0.213201	0.0228849	0.277357	0.076283
1.5	Lipodermatosclerosis	Skin diseases, Rare diseases	6	1	FLT1	http://www.malacards.org/card/lipodermatosclerosis					0.391195	0.213201	0.0228849	0.277357	0.076283
1.5	Intracranial Structure Hemangioma	Cancer diseases	2	1	FLT1	http://www.malacards.org/card/intracranial_structure_hemangioma					0.391195	0.213201	0.0228849	0.277357	0.076283
1.23	Acute Orbital Inflammation	Eye diseases	18	1	BIN1	http://www.malacards.org/card/acute_orbital_inflammation					0.391122	0.185001	0.0469346	0.0762687	0.201037
1.06	Conotruncal Heart Malformations	Skin diseases, Cardiovascular diseases, Rare diseases, Fetal diseases, Genetic diseases	32	1	MEF2A	http://www.malacards.org/card/conotruncal_heart_malformations					0.391028	0.228751	0.0645195	0.166187	0.0606093
1.5	Orofaciodigital Syndrome I	Eye diseases, Neuronal diseases, Bone diseases, Ear diseases, Oral diseases, Respiratory diseases, Nephrological diseases, Rare diseases, Fetal diseases, Genetic diseases	5	1	RPGR	http://www.malacards.org/card/orofaciodigital_syndrome_i					0.39075	0.190295	0.092217	0.223118	0.0863557
1.24	Prostate Adenocarcinoma	Reproductive diseases, Cancer diseases	17	1	WDR19	http://www.malacards.org/card/prostate_adenocarcinoma					0.390682	0.254725	0.0209405	0.161742	0.0507886
1.5	Naxos Disease	Skin diseases, Cardiovascular diseases, Rare diseases, Genetic diseases	4	1	DSC2	http://www.malacards.org/card/naxos_disease					0.390533	0.261267	0.139811	0.111693	0.0562368
1.5	Ectodermal Dysplasia/skin Fragility Syndrome	Skin diseases, Eye diseases, Rare diseases, Fetal diseases, Genetic diseases	2	1	DSC2	http://www.malacards.org/card/ectodermal_dysplasia_skin_fragility_syndrome					0.390533	0.261267	0.139811	0.111693	0.0562368
1.5	Denture Stomatitis	Oral diseases	7	1	DSC2	http://www.malacards.org/card/denture_stomatitis					0.390533	0.261267	0.139811	0.111693	0.0562368
1.5	Palmoplantar Keratoderma and Woolly Hair	Skin diseases, Rare diseases, Genetic diseases	4	1	DSC2	http://www.malacards.org/card/palmoplantar_keratoderma_and_woolly_hair					0.390533	0.261267	0.139811	0.111693	0.0562368
1.46	Townes-Brocks Syndrome	Bone diseases, Ear diseases, Nephrological diseases, Rare diseases, Fetal diseases, Genetic diseases	7	1	CTNNB1	http://www.malacards.org/card/townes_brocks_syndrome					0.390444	0.252227	0.00029908	0.258084	0.0199127
1.46	Hair Follicle Neoplasm	Cancer diseases	8	1	CTNNB1	http://www.malacards.org/card/hair_follicle_neoplasm					0.390444	0.252227	0.00029908	0.258084	0.0199127
1.46	Sclerosing Hemangioma	Cancer diseases	8	1	CTNNB1	http://www.malacards.org/card/sclerosing_hemangioma					0.390444	0.252227	0.00029908	0.258084	0.0199127
1.46	Chondroma	Cancer diseases, Rare diseases	8	1	CTNNB1	http://www.malacards.org/card/chondroma					0.390444	0.252227	0.00029908	0.258084	0.0199127
1.46	Uterine Carcinosarcoma	Reproductive diseases, Cancer diseases, Rare diseases	8	1	CTNNB1	http://www.malacards.org/card/uterine_carcinosarcoma					0.390444	0.252227	0.00029908	0.258084	0.0199127
1.46	Adamantinous Craniopharyngioma	Neuronal diseases, Cancer diseases	8	1	CTNNB1	http://www.malacards.org/card/adamantinous_craniopharyngioma					0.390444	0.252227	0.00029908	0.258084	0.0199127
1.46	Osteoblastoma	Bone diseases, Cancer diseases, Rare diseases	8	1	CTNNB1	http://www.malacards.org/card/osteoblastoma					0.390444	0.252227	0.00029908	0.258084	0.0199127
1.46	Periosteal Chondrosarcoma	Cancer diseases	8	1	CTNNB1	http://www.malacards.org/card/periosteal_chondrosarcoma					0.390444	0.252227	0.00029908	0.258084	0.0199127
2.33	Mmaa-Related Methylmalonic Acidemia	Nephrological diseases, Rare diseases, Genetic diseases, Metabolic diseases	1	1	MMAA	http://www.malacards.org/card/mmaa_related_methylmalonic_acidemia	Genetic Tests	MMAA			0.389957	0.118937	0.103729	0.152473	0.0620032
1.29	Pancreatic Intraductal Papillary-Mucinous Neoplasm	Endocrine diseases, Cancer diseases	14	1	CDKN1B	http://www.malacards.org/card/pancreatic_intraductal_papillary_mucinous_neoplasm					0.38934	0.233604	0.0482781	0.137826	0.0747532
1.29	Blastic Plasmacytoid Dendritic Cell	Immune diseases, Blood diseases, Cancer diseases, Rare diseases	14	1	CDKN1B	http://www.malacards.org/card/blastic_plasmacytoid_dendritic_cell					0.38934	0.233604	0.0482781	0.137826	0.0747532
1.18	Chagas Disease	Neuronal diseases, Rare diseases, Infectious diseases	22	1	IL12B	http://www.malacards.org/card/chagas_disease					0.389009	0.171942	0.0984192	0.190614	0.0665205
1.31	Long Qt Syndrome	Rare diseases, Genetic diseases	20	1	CALM1	http://www.malacards.org/card/long_qt_syndrome					0.388873	0.174993	0.0797189	0.164493	0.106162
1.43	Myopathy, Myofibrillar, 4	Neuronal diseases, Cardiovascular diseases, Muscle diseases, Rare diseases, Genetic diseases	7	1	DTNA	http://www.malacards.org/card/myopathy_myofibrillar_4					0.388676	0.10572	0.0115437	0.174904	0.12321
1.5	Mycobacterium Avium Complex Disease	Rare diseases, Infectious diseases	7	1	SLC11A1	http://www.malacards.org/card/mycobacterium_avium_complex_disease					0.388146	0.204165	0.0317503	0.237545	0.0176218
1.28	Carney Complex Variant	Skin diseases, Rare diseases, Genetic diseases	13	1	CDKN1B	http://www.malacards.org/card/carney_complex_variant					0.387466	0.23248	0.0480458	0.137163	0.0743935
1.46	Infantile Epileptic Encephalopathy	Neuronal diseases, Mental diseases, Rare diseases, Genetic diseases	8	1	ARX	http://www.malacards.org/card/infantile_epileptic_encephalopathy					0.387446	0.168926	0.0670281	0.230143	0.00554048
1.44	Fibromatosis	Rare diseases	8	1	CTNNB1	http://www.malacards.org/card/fibromatosis					0.387332	0.250216	0.000296696	0.256026	0.0197539
2.33	Nlgn4-Related X-Linked Mental Retardation	Neuronal diseases, Mental diseases, Genetic diseases	1	1	NLGN4X	http://www.malacards.org/card/nlgn4_related_x_linked_mental_retardation	Genetic Tests	NLGN4X			0.387164	0.110729	0.000170352	0.0723997	0.111116
1.21	Orbital Cellulitis	Eye diseases	19	1	BIN1	http://www.malacards.org/card/orbital_cellulitis					0.387064	0.183081	0.0464477	0.0754776	0.198951
1.36	Autoimmune Lymphoproliferative Syndrome, Type V	Immune diseases, Blood diseases, Cancer diseases, Rare diseases, Genetic diseases	10	1	BCL2	http://www.malacards.org/card/autoimmune_lymphoproliferative_syndrome_type_v					0.386404	0.0163836	0.0884866	0.255413	0.0206726
1.36	Ovarian Serous Cystadenocarcinoma	Cancer diseases	11	1	BCL2	http://www.malacards.org/card/ovarian_serous_cystadenocarcinoma					0.386404	0.0163836	0.0884866	0.255413	0.0206726
1.36	Gastrointestinal Carcinoma	Gastrointestinal diseases, Cancer diseases	11	1	BCL2	http://www.malacards.org/card/gastrointestinal_carcinoma					0.386404	0.0163836	0.0884866	0.255413	0.0206726
1.29	Hydrocephalus	Neuronal diseases, Gastrointestinal diseases, Rare diseases, Fetal diseases, Genetic diseases	23	1	FANCB	http://www.malacards.org/card/hydrocephalus					0.386213	0.255287	0.0171865	0.101188	0.107754
1.04	Heart Disease	Cardiovascular diseases, Genetic diseases	45	1	MEF2A	http://www.malacards.org/card/heart_disease					0.385996	0.225808	0.0636894	0.164048	0.0598294
1.23	Lipodystrophy	Skin diseases, Endocrine diseases, Rare diseases	17	1	LPIN1	http://www.malacards.org/card/lipodystrophy					0.385931	0.0903078	0.0536444	0.187948	0.104587
2.27	Methylmalonic Acidemia	Nephrological diseases, Rare diseases, Genetic diseases, Metabolic diseases	18	1	MMAA	http://www.malacards.org/card/methylmalonic_acidemia	Causative germline mutation	MMAA			0.385846	0.117683	0.102635	0.150866	0.0613495
1.24	Hemangioma of Intra-Abdominal Structure	Cancer diseases	17	1	TBL1XR1	http://www.malacards.org/card/hemangioma_of_intra_abdominal_structure					0.385679	0.194768	0.022138	0.146558	0.128045
1.27	Periampullary Adenocarcinoma	Gastrointestinal diseases, Cancer diseases	15	1	CDKN1B	http://www.malacards.org/card/periampullary_adenocarcinoma					0.385579	0.231348	0.0478118	0.136495	0.0740312
1.29	Primary Systemic Mycosis	Infectious diseases	14	1	CALM1	http://www.malacards.org/card/primary_systemic_mycosis					0.385204	0.173342	0.0789667	0.162941	0.105161
1.29	Phaeohyphomycosis	Neuronal diseases, Gastrointestinal diseases, Respiratory diseases, Rare diseases, Infectious diseases	14	1	CALM1	http://www.malacards.org/card/phaeohyphomycosis					0.385204	0.173342	0.0789667	0.162941	0.105161
1.46	Anal Canal Squamous Cell Carcinoma	Gastrointestinal diseases, Cancer diseases, Rare diseases	8	1	FLT1	http://www.malacards.org/card/anal_canal_squamous_cell_carcinoma					0.38518	0.209923	0.022533	0.273092	0.07511
1.26	Hepatic Encephalopathy	Neuronal diseases, Liver diseases, Rare diseases	26	1	DDIT4	http://www.malacards.org/card/hepatic_encephalopathy			Brain	DDIT4	0.384882	0.239012	0.122777	0.170118	0.0271342
1.42	Craniodiaphyseal Dysplasia	Bone diseases, Rare diseases, Fetal diseases, Genetic diseases	8	1	CTNNB1	http://www.malacards.org/card/craniodiaphyseal_dysplasia					0.384176	0.248178	0.000294279	0.25394	0.019593
1.42	Clear Cell Adenoma	Reproductive diseases, Cancer diseases	9	1	CTNNB1	http://www.malacards.org/card/clear_cell_adenoma					0.384176	0.248178	0.000294279	0.25394	0.019593
1.42	Pseudosarcomatous Fibromatosis		9	1	CTNNB1	http://www.malacards.org/card/pseudosarcomatous_fibromatosis					0.384176	0.248178	0.000294279	0.25394	0.019593
1.42	Psammomatous Meningioma	Neuronal diseases, Cancer diseases	9	1	CTNNB1	http://www.malacards.org/card/psammomatous_meningioma					0.384176	0.248178	0.000294279	0.25394	0.019593
1.42	Lobular Neoplasia	Cancer diseases	9	1	CTNNB1	http://www.malacards.org/card/lobular_neoplasia					0.384176	0.248178	0.000294279	0.25394	0.019593
1.42	Mast-Cell Leukemia	Immune diseases, Cancer diseases	9	1	CTNNB1	http://www.malacards.org/card/mast_cell_leukemia					0.384176	0.248178	0.000294279	0.25394	0.019593
1.2	Optic Nerve Disease	Eye diseases, Neuronal diseases	20	1	MFN1	http://www.malacards.org/card/optic_nerve_disease					0.383274	0.106167	0.13338	0.156376	0.137212
1.05	Overnutrition	Metabolic diseases	42	1	IRS1	http://www.malacards.org/card/overnutrition					0.383177	0.120318	0.119168	0.155187	0.153654
1.16	Substance Dependence	Mental diseases	24	1	RGS17	http://www.malacards.org/card/substance_dependence					0.382403	0.232883	0.0228294	0.231736	0.00963655
1.36	Fibrillary Astrocytoma	Neuronal diseases, Cancer diseases, Rare diseases	10	1	KIAA1549	http://www.malacards.org/card/fibrillary_astrocytoma					0.382348	0.159439	0.0611756	0.111645	0.0764695
1.39	Barth Syndrome	Eye diseases, Neuronal diseases, Cardiovascular diseases, Blood diseases, Rare diseases, Genetic diseases, Metabolic diseases	9	1	DTNA	http://www.malacards.org/card/barth_syndrome					0.382227	0.103966	0.0113521	0.172002	0.121166
1	Vascular Disease	Neuronal diseases, Cardiovascular diseases, Mental diseases, Gastrointestinal diseases	57	1	CAT	http://www.malacards.org/card/vascular_disease					0.381893	0.231045	0.14321	0.10082	0.163832
1.5	X-Linked Nonsyndromic Deafness	Neuronal diseases, Ear diseases, Mental diseases, Rare diseases, Genetic diseases	6	1	DCBLD2	http://www.malacards.org/card/x_linked_nonsyndromic_deafness					0.381879	0.0912692	0.0300539	0.255859	0.0706477
1.27	Clear Cell Acanthoma	Cancer diseases	15	1	CALM1	http://www.malacards.org/card/clear_cell_acanthoma					0.381483	0.171667	0.078204	0.161367	0.104145
1.33	Salivary Gland Adenoid Cystic Carcinoma	Skin diseases, Endocrine diseases, Oral diseases, Cancer diseases, Rare diseases	12	1	BCL2	http://www.malacards.org/card/salivary_gland_adenoid_cystic_carcinoma					0.381223	0.0161638	0.0873	0.251988	0.0203954
1.33	Endothelial Dystrophy	Eye diseases, Rare diseases	12	1	BCL2	http://www.malacards.org/card/endothelial_dystrophy					0.381223	0.0161638	0.0873	0.251988	0.0203954
1.19	Caroli Disease	Gastrointestinal diseases, Liver diseases, Rare diseases, Fetal diseases	20	1	WDR19	http://www.malacards.org/card/caroli_disease					0.380566	0.248129	0.0203984	0.157554	0.0494736
1.76	Muscular Dystrophy-Dystroglycanopathy , Type C, 5	Eye diseases, Neuronal diseases, Mental diseases, Muscle diseases, Rare diseases, Fetal diseases, Genetic diseases, Metabolic diseases	154	3	BTG1, LPIN1, SH3BGRL	http://www.malacards.org/card/muscular_dystrophy_dystroglycanopathy_limb_girdle_type_c_5			Skeletal Muscle	BTG1, LPIN1, SH3BGRL	0.380169	0.141296	0.0309457	0.126089	0.0477999
1.5	Hyperlipoproteinemia Type Iii	Endocrine diseases, Rare diseases, Genetic diseases, Metabolic diseases	5	1	SERPINB6	http://www.malacards.org/card/hyperlipoproteinemia_type_iii					0.380063	0.207515	0.12238	0.210935	0.0395266
1.5	Diffuse Cutaneous Mastocytosis	Skin diseases, Immune diseases, Blood diseases, Cancer diseases, Rare diseases	7	1	SERPINB6	http://www.malacards.org/card/diffuse_cutaneous_mastocytosis					0.380063	0.207515	0.12238	0.210935	0.0395266
1.21	Intellectual Disability	Neuronal diseases, Mental diseases, Rare diseases, Genetic diseases	18	1	TBL1XR1	http://www.malacards.org/card/intellectual_disability					0.379729	0.191763	0.0217964	0.144297	0.12607
1.26	Idiopathic Scoliosis	Bone diseases	16	1	CALM1	http://www.malacards.org/card/idiopathic_scoliosis					0.379603	0.170821	0.0778187	0.160572	0.103632
1.5	Anodontia	Oral diseases, Gastrointestinal diseases, Rare diseases	6	1	EVC2	http://www.malacards.org/card/anodontia					0.379443	0.168852	0.0504659	0.214385	0.0572959
1.39	Aspiration Pneumonitis	Respiratory diseases	10	1	CTNNB1	http://www.malacards.org/card/aspiration_pneumonitis					0.379359	0.245066	0.000290589	0.250756	0.0193473
1.39	Appendiceal Neoplasm	Gastrointestinal diseases, Cancer diseases	10	1	CTNNB1	http://www.malacards.org/card/appendiceal_neoplasm					0.379359	0.245066	0.000290589	0.250756	0.0193473
1.39	Hemangiopericytoma	Cancer diseases, Rare diseases	10	1	CTNNB1	http://www.malacards.org/card/hemangiopericytoma					0.379359	0.245066	0.000290589	0.250756	0.0193473
1.11	Demyelinating Disease	Neuronal diseases	31	1	ABCD2	http://www.malacards.org/card/demyelinating_disease					0.379174	0.127023	0.144465	0.170249	0.108065
1.42	Background Diabetic Retinopathy	Eye diseases	9	1	FLT1	http://www.malacards.org/card/background_diabetic_retinopathy					0.378996	0.206553	0.0221712	0.268708	0.0739041
1.22	Acrocallosal Syndrome	Neuronal diseases, Bone diseases, Mental diseases, Rare diseases, Fetal diseases, Genetic diseases	16	1	NINJ1	http://www.malacards.org/card/acrocallosal_syndrome					0.378752	0.140896	0.156803	0.271565	0.0232932
1.19	Joubert Syndrome and Related Disorders	Neuronal diseases, Nephrological diseases, Rare diseases, Fetal diseases, Genetic diseases	20	1	AHI1	http://www.malacards.org/card/joubert_syndrome_and_related_disorders					0.378669	0.151468	0.0802779	0.159798	0.0852006
1.23	Tonsil Cancer	Cancer diseases	18	1	CDKN1B	http://www.malacards.org/card/tonsil_cancer					0.3779	0.22674	0.0468596	0.133777	0.0725568
1.23	T-Cell Prolymphocytic Leukemia	Immune diseases, Blood diseases, Cancer diseases, Rare diseases	17	1	CDKN1B	http://www.malacards.org/card/t_cell_prolymphocytic_leukemia					0.3779	0.22674	0.0468596	0.133777	0.0725568
1.31	Soft Tissue Sarcoma	Cancer diseases, Rare diseases	12	1	BCL2	http://www.malacards.org/card/soft_tissue_sarcoma					0.377708	0.0160148	0.0864951	0.249665	0.0202074
1.36	Seminal Vesicle Tumor	Cancer diseases	11	1	DIRC2	http://www.malacards.org/card/seminal_vesicle_tumor					0.377533	0.0792819	0.156676	0.16687	0.0290323
1.33	Pick Disease	Neuronal diseases, Mental diseases, Rare diseases, Genetic diseases	18	1	NPC1	http://www.malacards.org/card/pick_disease					0.376521	0.10279	0.125758	0.242103	0.0474417
1.33	Non-Langerhans-Cell Histiocytosis	Immune diseases, Rare diseases	12	1	NPC1	http://www.malacards.org/card/non_langerhans_cell_histiocytosis					0.376521	0.10279	0.125758	0.242103	0.0474417
0.94	Behcet's Disease	Skin diseases, Eye diseases, Neuronal diseases, Bone diseases, Cardiovascular diseases, Nephrological diseases, Rare diseases	73	1	UACA	http://www.malacards.org/card/behcets_disease					0.376486	0.216856	0.023681	0.265046	0.0786857
1.15	Chronic Kidney Failure	Nephrological diseases, Genetic diseases	25	1	PKD2	http://www.malacards.org/card/chronic_kidney_failure					0.376138	0.153464	0.00127135	0.233958	0.00462649
1.42	Campylobacteriosis	Gastrointestinal diseases, Infectious diseases	9	1	SLC11A1	http://www.malacards.org/card/campylobacteriosis					0.376042	0.197798	0.0307602	0.230137	0.0170723
1.02	Glucose Metabolism Disease	Metabolic diseases	51	1	IRS1	http://www.malacards.org/card/glucose_metabolism_disease					0.375656	0.117956	0.116829	0.152141	0.150638
1.14	Pulmonary Emphysema	Respiratory diseases	46	1	P2RY1	http://www.malacards.org/card/pulmonary_emphysema			Lung	P2RY1	0.375514	0.174239	0.129177	0.220051	0.0221178
1.16	Cranial Nerve Disease	Neuronal diseases	24	1	MFN1	http://www.malacards.org/card/cranial_nerve_disease					0.374969	0.103866	0.130489	0.152987	0.134239
2.33	Mitochondrial Respiratory Chain Complex Iii Deficiency, Uqcrb-Related	Genetic diseases	1	1	UQCRB	http://www.malacards.org/card/mitochondrial_respiratory_chain_complex_iii_deficiency_uqcrb_related	Genetic Tests	UQCRB			0.374857	0.188178	0.0382354	0.258651	0.0697233
1.38	Lissencephaly	Skin diseases, Neuronal diseases, Cardiovascular diseases, Rare diseases, Fetal diseases, Genetic diseases	17	1	ARX	http://www.malacards.org/card/lissencephaly					0.37483	0.163426	0.0648456	0.222649	0.00536007
1.36	Acinar Cell Carcinoma	Cancer diseases, Rare diseases	11	1	CTNNB1	http://www.malacards.org/card/acinar_cell_carcinoma					0.374441	0.241889	0.000286822	0.247505	0.0190965
1.36	Epstein-Barr Virus-Associated Gastric Carcinoma	Gastrointestinal diseases, Cancer diseases, Rare diseases	11	1	CTNNB1	http://www.malacards.org/card/epstein_barr_virus_associated_gastric_carcinoma					0.374441	0.241889	0.000286822	0.247505	0.0190965
1.36	Hepatocellular Adenoma	Liver diseases, Cancer diseases, Rare diseases	11	1	CTNNB1	http://www.malacards.org/card/hepatocellular_adenoma					0.374441	0.241889	0.000286822	0.247505	0.0190965
1.39	Mild Pre-Eclampsia	Cardiovascular diseases	10	1	FLT1	http://www.malacards.org/card/mild_pre_eclampsia					0.374244	0.203963	0.0218933	0.265339	0.0729775
1.39	Capillary Hemangioma	Skin diseases, Eye diseases, Cardiovascular diseases, Cancer diseases, Rare diseases, Fetal diseases, Genetic diseases	10	1	FLT1	http://www.malacards.org/card/capillary_hemangioma					0.374244	0.203963	0.0218933	0.265339	0.0729775
1.29	Duodenal Benign Neoplasm	Gastrointestinal diseases, Cancer diseases	14	1	BCL2	http://www.malacards.org/card/duodenal_benign_neoplasm					0.374144	0.0158637	0.0856789	0.247309	0.0200167
1.14	Kidney Disease	Nephrological diseases, Genetic diseases	46	1	PKD2	http://www.malacards.org/card/kidney_disease					0.373992	0.152589	0.00126409	0.232623	0.0046001
1.21	Pulmonary Large Cell Neuroendocrine Carcinoma	Neuronal diseases, Respiratory diseases, Cancer diseases	19	1	CDKN1B	http://www.malacards.org/card/pulmonary_large_cell_neuroendocrine_carcinoma					0.37398	0.224388	0.0463735	0.132389	0.0718041
1.21	Cerebral Meningioma	Neuronal diseases, Cancer diseases	19	1	CDKN1B	http://www.malacards.org/card/cerebral_meningioma					0.37398	0.224388	0.0463735	0.132389	0.0718041
1.21	Hyperparathyroidism	Endocrine diseases, Cancer diseases, Rare diseases, Genetic diseases	19	1	CDKN1B	http://www.malacards.org/card/hyperparathyroidism					0.37398	0.224388	0.0463735	0.132389	0.0718041
1.23	Myotonia		17	1	CALM1	http://www.malacards.org/card/myotonia					0.373885	0.168248	0.0766465	0.158154	0.102071
1.23	Commensal Bacterial Infectious Disease	Infectious diseases	18	1	CALM1	http://www.malacards.org/card/commensal_bacterial_infectious_disease					0.373885	0.168248	0.0766465	0.158154	0.102071
1.39	Laurence-Moon Syndrome	Endocrine diseases, Eye diseases, Neuronal diseases, Reproductive diseases, Rare diseases, Fetal diseases, Genetic diseases	9	1	RPGR	http://www.malacards.org/card/laurence_moon_syndrome					0.373818	0.182049	0.0882211	0.21345	0.0826138
1.31	Childhood Oligodendroglioma	Cancer diseases	13	1	KIAA1549	http://www.malacards.org/card/childhood_oligodendroglioma					0.373742	0.15585	0.0597987	0.109133	0.0747484
1.5	Anterograde Amnesia	Mental diseases	7	1	GRM1	http://www.malacards.org/card/anterograde_amnesia					0.373576	0.0821867	0.0220036	0.142332	0.0414669
1.42	Dysautonomia, Familial	Skin diseases, Eye diseases, Neuronal diseases, Rare diseases, Genetic diseases	8	1	TECPR2	http://www.malacards.org/card/dysautonomia_familial					0.373318	0.100423	0.244524	0.121702	0.0940763
1.42	Spastic Paraparesis	Rare diseases	9	1	TECPR2	http://www.malacards.org/card/spastic_paraparesis					0.373318	0.100423	0.244524	0.121702	0.0940763
1.2	Hypoxia		32	1	DDIT4	http://www.malacards.org/card/hypoxia					0.373166	0.231736	0.11904	0.164939	0.0263082
1.19	Hereditary Sensory Neuropathy	Neuronal diseases, Mental diseases, Gastrointestinal diseases, Rare diseases, Genetic diseases	19	1	NINJ1	http://www.malacards.org/card/hereditary_sensory_neuropathy					0.372765	0.138669	0.154325	0.267273	0.0229251
2.29	Mitochondrial Complex Iii Deficiency	Rare diseases, Genetic diseases, Metabolic diseases	10	1	UQCRB	http://www.malacards.org/card/mitochondrial_complex_iii_deficiency	Causative germline mutation	UQCRB			0.37224	0.186865	0.0379685	0.256846	0.0692367
1.41	Chromosome 2p16.1-P15 Deletion Syndrome	Rare diseases, Fetal diseases, Genetic diseases	9	1	VRK2	http://www.malacards.org/card/chromosome_2p161_p15_deletion_syndrome					0.371554	0.0419856	0.122613	0.146764	0.12187
1.39	Multidrug-Resistant Tuberculosis	Infectious diseases	10	1	SLC11A1	http://www.malacards.org/card/multidrug_resistant_tuberculosis					0.371327	0.195318	0.0303745	0.227252	0.0168582
0.96	Tetralogy of Fallot	Cardiovascular diseases, Rare diseases, Fetal diseases, Genetic diseases	62	1	CAT	http://www.malacards.org/card/tetralogy_of_fallot					0.371156	0.22455	0.139184	0.0979853	0.159226
1.34	Birt-Hogg-Dube Syndrome	Skin diseases, Nephrological diseases, Cancer diseases, Rare diseases, Genetic diseases	10	1	CTNNB1	http://www.malacards.org/card/birt_hogg_dube_syndrome					0.371105	0.239734	0.000284266	0.2453	0.0189263
1.33	Muscle Disorders	Neuronal diseases, Muscle diseases, Genetic diseases	12	1	CHKA	http://www.malacards.org/card/muscle_disorders					0.370956	0.132802	0.0311232	0.0738202	0.0229992
1.11	Metabolic Syndrome X	Rare diseases, Metabolic diseases	30	1	ETFDH	http://www.malacards.org/card/metabolic_syndrome_x					0.370802	0.216549	0.0163895	0.224706	0.0515415
1.14	Optic Atrophy Plus Syndrome	Eye diseases, Neuronal diseases, Ear diseases, Rare diseases, Genetic diseases	25	1	MFN1	http://www.malacards.org/card/optic_atrophy_plus_syndrome					0.370729	0.102692	0.129014	0.151258	0.132721
1	Acquired Metabolic Disease	Rare diseases, Metabolic diseases	57	1	IRS1	http://www.malacards.org/card/acquired_metabolic_disease					0.370554	0.116354	0.115242	0.150075	0.148592
1.27	Spindle Cell Synovial Sarcoma	Cancer diseases	15	1	BCL2	http://www.malacards.org/card/spindle_cell_synovial_sarcoma					0.37053	0.0157105	0.0848514	0.24492	0.0198234
1.27	Serous Cystadenocarcinoma	Cancer diseases	15	1	BCL2	http://www.malacards.org/card/serous_cystadenocarcinoma					0.37053	0.0157105	0.0848514	0.24492	0.0198234
1.56	Sebaceous Adenocarcinoma	Skin diseases, Endocrine diseases, Cancer diseases	9	1	MLH1	http://www.malacards.org/card/sebaceous_adenocarcinoma					0.370474	0.0677968	0.136705	0.196722	0.0283042
1.33	Papillary Craniopharyngioma	Neuronal diseases, Cancer diseases	12	1	CTNNB1	http://www.malacards.org/card/papillary_craniopharyngioma					0.369419	0.238645	0.000282975	0.244186	0.0188404
1.36	Microcystic Meningioma	Neuronal diseases, Cancer diseases	11	1	FLT1	http://www.malacards.org/card/microcystic_meningioma					0.369392	0.201319	0.0216094	0.261899	0.0720314
1.43	Hydrolethalus Syndrome	Neuronal diseases, Rare diseases, Fetal diseases, Genetic diseases	7	1	EVC2	http://www.malacards.org/card/hydrolethalus_syndrome					0.369126	0.164261	0.0490937	0.208556	0.055738
1.36	Retinitis Pigmentosa 2	Eye diseases, Rare diseases, Genetic diseases	10	1	RPGR	http://www.malacards.org/card/retinitis_pigmentosa_2_2					0.368972	0.179689	0.0870774	0.210683	0.0815428
1.36	Peripheral Retinal Degeneration	Eye diseases	11	1	RPGR	http://www.malacards.org/card/peripheral_retinal_degeneration					0.368972	0.179689	0.0870774	0.210683	0.0815428
1.36	Achromatopsia	Eye diseases, Rare diseases, Genetic diseases	25	1	RPGR	http://www.malacards.org/card/achromatopsia	Candidate gene tested	RPGR			0.368972	0.179689	0.0870774	0.210683	0.0815428
1.26	Vertebrobasilar Insufficiency	Neuronal diseases, Cardiovascular diseases	16	1	TCF20	http://www.malacards.org/card/vertebrobasilar_insufficiency					0.368919	0.179295	0.0689879	0.117316	0.0553379
1.31	Pulmonic Stenosis	Rare diseases	13	1	DTNA	http://www.malacards.org/card/pulmonic_stenosis					0.368781	0.100308	0.0109528	0.165951	0.116903
1.26	Keratocystic Odontogenic Tumor	Oral diseases, Cancer diseases, Rare diseases	16	1	BCL2	http://www.malacards.org/card/keratocystic_odontogenic_tumor					0.368704	0.0156331	0.0844333	0.243714	0.0197257
1.5	Holoprosencephaly, Recurrent Infections, and Monocytosis	Rare diseases	2	1	SIX3	http://www.malacards.org/card/holoprosencephaly_recurrent_infections_and_monocytosis					0.368525	0.218167	0.0619121	0.175418	0.0689141
1.5	Porencephaly	Neuronal diseases, Rare diseases, Fetal diseases, Genetic diseases	6	1	SIX3	http://www.malacards.org/card/porencephaly					0.368525	0.218167	0.0619121	0.175418	0.0689141
1.5	Pseudobulbar Palsy	Neuronal diseases	7	1	SIX3	http://www.malacards.org/card/pseudobulbar_palsy					0.368525	0.218167	0.0619121	0.175418	0.0689141
1.5	Spastic Hemiplegia	Neuronal diseases, Rare diseases	7	1	SIX3	http://www.malacards.org/card/spastic_hemiplegia					0.368525	0.218167	0.0619121	0.175418	0.0689141
1.5	Anencephaly	Neuronal diseases, Rare diseases	5	1	SIX3	http://www.malacards.org/card/anencephaly					0.368525	0.218167	0.0619121	0.175418	0.0689141
1.5	Partial Motor Epilepsy	Neuronal diseases	4	1	SIX3	http://www.malacards.org/card/partial_motor_epilepsy					0.368525	0.218167	0.0619121	0.175418	0.0689141
1.08	Fibrosarcoma	Bone diseases, Cancer diseases, Rare diseases	34	1	PLAU	http://www.malacards.org/card/fibrosarcoma					0.368436	0.128216	0.0957932	0.173533	0.0156585
1.5	Tufted Angioma	Skin diseases, Cardiovascular diseases, Cancer diseases, Rare diseases, Fetal diseases	5	1	PROX1	http://www.malacards.org/card/tufted_angioma					0.36813	0.160137	0.0241125	0.0839337	0.139153
1.5	Capillary Lymphangioma	Skin diseases, Immune diseases, Cardiovascular diseases, Cancer diseases	3	1	PROX1	http://www.malacards.org/card/capillary_lymphangioma					0.36813	0.160137	0.0241125	0.0839337	0.139153
1.5	Kaposiform Hemangioendothelioma	Cardiovascular diseases, Cancer diseases, Rare diseases, Fetal diseases	3	1	PROX1	http://www.malacards.org/card/kaposiform_hemangioendothelioma					0.36813	0.160137	0.0241125	0.0839337	0.139153
1.5	Angiokeratoma of Fordyce	Cancer diseases	4	1	PROX1	http://www.malacards.org/card/angiokeratoma_of_fordyce					0.36813	0.160137	0.0241125	0.0839337	0.139153
1.5	Hemangioendothelioma	Rare diseases	6	1	PROX1	http://www.malacards.org/card/hemangioendothelioma					0.36813	0.160137	0.0241125	0.0839337	0.139153
0.99	Maturity-Onset Diabetes of the Young	Endocrine diseases, Neuronal diseases, Rare diseases, Genetic diseases	47	1	IRS1	http://www.malacards.org/card/maturity_onset_diabetes_of_the_young					0.367977	0.115545	0.114441	0.149031	0.147559
2.83	Proliferative Vasculopathy and Hydraencephaly-Hydrocephaly Syndrome	Cardiovascular diseases, Genetic diseases	2	1	FLVCR2	http://www.malacards.org/card/proliferative_vasculopathy_and_hydraencephaly_hydrocephaly_syndrome	Pathogenic, Causative mutation Ð Humsavar, Genetic Tests, Molecular basis known	FLVCR2			0.367968	0.0662342	0.185088	0.0956717	0.0699139
2.83	Fowler's Syndrome	Neuronal diseases, Cardiovascular diseases, Reproductive diseases, Rare diseases, Fetal diseases	1	1	FLVCR2	http://www.malacards.org/card/fowlers_syndrome	Causative germline mutation	FLVCR2			0.367968	0.0662342	0.185088	0.0956717	0.0699139
1.46	Hypothalamic Hamartomas	Rare diseases	8	1	GRM1	http://www.malacards.org/card/hypothalamic_hamartomas					0.367832	0.080923	0.0216653	0.140144	0.0408293
1.31	Spermatocele	Reproductive diseases	13	1	TMEM245	http://www.malacards.org/card/spermatocele					0.367611	0.167263	0.0323498	0.179027	0.00165425
1.35	Retinitis	Eye diseases	17	1	RPGR	http://www.malacards.org/card/retinitis					0.367334	0.178892	0.0866908	0.209748	0.0811808
1.33	Neuronal Migration Disorders	Neuronal diseases	12	1	ARX	http://www.malacards.org/card/neuronal_migration_disorders					0.366582	0.15983	0.0634188	0.21775	0.00524213
1.36	Post-Transplant Lymphoproliferative Disease	Immune diseases, Blood diseases, Cancer diseases, Rare diseases	11	1	SLC11A1	http://www.malacards.org/card/post_transplant_lymphoproliferative_disease					0.366513	0.192786	0.0299807	0.224306	0.0166397
1.31	Esophageal Basaloid Squamous Cell Carcinoma	Gastrointestinal diseases, Cancer diseases	13	1	CTNNB1	http://www.malacards.org/card/esophageal_basaloid_squamous_cell_carcinoma					0.366013	0.236445	0.000280366	0.241935	0.0186667
1.31	Fibroma	Cancer diseases	13	1	CTNNB1	http://www.malacards.org/card/fibroma					0.366013	0.236445	0.000280366	0.241935	0.0186667
1.31	Exfoliative Dermatitis	Skin diseases, Rare diseases	13	1	CTNNB1	http://www.malacards.org/card/exfoliative_dermatitis					0.366013	0.236445	0.000280366	0.241935	0.0186667
1.31	Conventional Fibrosarcoma	Cancer diseases	13	1	CTNNB1	http://www.malacards.org/card/conventional_fibrosarcoma					0.366013	0.236445	0.000280366	0.241935	0.0186667
1.39	Diverticulitis	Gastrointestinal diseases	10	1	DCBLD2	http://www.malacards.org/card/diverticulitis					0.365332	0.0873143	0.0287516	0.244772	0.0675864
1.29	Meniere's Disease	Ear diseases, Rare diseases	13	1	DTNA	http://www.malacards.org/card/menieres_disease					0.365301	0.0993618	0.0108494	0.164385	0.1158
1.22	Ectodermal Dysplasia 10b, Hypohidrotic/hair/tooth Type, Autosomal Recessive	Skin diseases, Eye diseases, Rare diseases, Fetal diseases, Genetic diseases	15	1	TAB2	http://www.malacards.org/card/ectodermal_dysplasia_10b_hypohidrotic_hair_tooth_type_autosomal_recessive					0.363704	0.243682	0.0803786	0.163667	0.00840157
1.5	Muscular Phosphorylase Kinase Deficiency	Muscle diseases, Rare diseases	1	1	NEK3	http://www.malacards.org/card/muscular_phosphorylase_kinase_deficiency					0.363462	0.120669	0.176643	0.144294	0.131937
1.31	Non-Syndromic Intellectual Disability	Fetal diseases	13	1	ARX	http://www.malacards.org/card/non_syndromic_intellectual_disability					0.363203	0.158356	0.062834	0.215742	0.0051938
1.31	Neonatal Period Electroclinical Syndrome	Neuronal diseases	13	1	ARX	http://www.malacards.org/card/neonatal_period_electroclinical_syndrome					0.363203	0.158356	0.062834	0.215742	0.0051938
1.23	Endometrial Adenocarcinoma	Cancer diseases	18	1	BCL2	http://www.malacards.org/card/endometrial_adenocarcinoma					0.363151	0.0153976	0.0831615	0.240042	0.0194286
1.5	Amyotrophic Lateral Sclerosis 19	Neuronal diseases, Mental diseases, Rare diseases, Genetic diseases	4	1	ALS2	http://www.malacards.org/card/amyotrophic_lateral_sclerosis_19					0.362585	0.129805	0.206311	0.109863	0.100073
1.5	Aicardi-Goutieres Syndrome 1, Dominant and Recessive	Neuronal diseases, Immune diseases, Blood diseases, Rare diseases, Genetic diseases	4	1	ALS2	http://www.malacards.org/card/aicardi_goutieres_syndrome_1_dominant_and_recessive					0.362585	0.129805	0.206311	0.109863	0.100073
1.29	Ameloblastoma	Oral diseases, Cancer diseases, Rare diseases	14	1	CTNNB1	http://www.malacards.org/card/ameloblastoma					0.36256	0.234214	0.000277721	0.239652	0.0184905
1.29	Simpson-Golabi-Behmel Syndrome	Neuronal diseases, Mental diseases, Nephrological diseases, Cancer diseases, Rare diseases, Fetal diseases, Genetic diseases	13	1	CTNNB1	http://www.malacards.org/card/simpson_golabi_behmel_syndrome					0.36256	0.234214	0.000277721	0.239652	0.0184905
1.46	Inflammatory Breast Carcinoma	Reproductive diseases, Cancer diseases, Rare diseases, Genetic diseases	8	1	PROX1	http://www.malacards.org/card/inflammatory_breast_carcinoma					0.36247	0.157674	0.0237418	0.0826432	0.137014
1.5	Colorectal Cancer 2	Gastrointestinal diseases, Cancer diseases, Rare diseases, Genetic diseases	3	1	MLH1	http://www.malacards.org/card/colorectal_cancer_2					0.3624	0.0663192	0.133726	0.192434	0.0276874
1.5	Appendix Carcinoid Tumor	Cancer diseases	4	1	MLH1	http://www.malacards.org/card/appendix_carcinoid_tumor					0.3624	0.0663192	0.133726	0.192434	0.0276874
1.5	Lower Lip Cancer	Oral diseases, Cancer diseases	5	1	MLH1	http://www.malacards.org/card/lower_lip_cancer					0.3624	0.0663192	0.133726	0.192434	0.0276874
1.5	Monophasic Synovial Sarcoma	Cancer diseases	6	1	MLH1	http://www.malacards.org/card/monophasic_synovial_sarcoma					0.3624	0.0663192	0.133726	0.192434	0.0276874
1.5	Sebaceous Adenoma	Skin diseases, Endocrine diseases, Cancer diseases	6	1	MLH1	http://www.malacards.org/card/sebaceous_adenoma					0.3624	0.0663192	0.133726	0.192434	0.0276874
1.32	Cone-Rod Dystrophy 6	Eye diseases, Rare diseases, Genetic diseases	8	1	RPGR	http://www.malacards.org/card/cone_rod_dystrophy_6					0.362352	0.176465	0.085515	0.206903	0.0800797
1.25	Multiple Sulfatase Deficiency	Skin diseases, Neuronal diseases, Bone diseases, Rare diseases, Fetal diseases, Genetic diseases, Metabolic diseases	15	1	NPC1	http://www.malacards.org/card/multiple_sulfatase_deficiency					0.362342	0.0989193	0.121022	0.232986	0.045655
1.17	Pertussis	Respiratory diseases, Rare diseases, Infectious diseases	22	1	CALM1	http://www.malacards.org/card/pertussis					0.362087	0.162939	0.0742277	0.153163	0.0988496
1.17	Scoliosis	Bone diseases, Rare diseases	23	1	CALM1	http://www.malacards.org/card/scoliosis					0.362087	0.162939	0.0742277	0.153163	0.0988496
1.27	Vestibular Nystagmus	Eye diseases	15	1	DTNA	http://www.malacards.org/card/vestibular_nystagmus					0.361772	0.0984021	0.0107446	0.162798	0.114682
1.31	Hellp Syndrome	Cardiovascular diseases, Liver diseases, Blood diseases, Rare diseases	13	1	FLT1	http://www.malacards.org/card/hellp_syndrome					0.361078	0.196788	0.0211231	0.256004	0.0704102
1.31	Vascular Cancer	Cardiovascular diseases, Nephrological diseases, Blood diseases, Cancer diseases	13	1	FLT1	http://www.malacards.org/card/vascular_cancer					0.361078	0.196788	0.0211231	0.256004	0.0704102
1.31	Bronchopulmonary Dysplasia	Respiratory diseases, Rare diseases, Fetal diseases	13	1	FLT1	http://www.malacards.org/card/bronchopulmonary_dysplasia					0.361078	0.196788	0.0211231	0.256004	0.0704102
1.28	Colonic Benign Neoplasm	Gastrointestinal diseases, Cancer diseases	13	1	CTNNB1	http://www.malacards.org/card/colonic_benign_neoplasm					0.360815	0.233086	0.000276384	0.238499	0.0184016
1.24	Sphingolipidosis	Rare diseases, Metabolic diseases	17	1	NPC1	http://www.malacards.org/card/sphingolipidosis					0.360513	0.0984201	0.120411	0.23181	0.0454247
2.65	Athyreosis	Endocrine diseases, Rare diseases	6	1	SLC26A4	http://www.malacards.org/card/athyreosis	Causative germline mutation	SLC26A4			0.359851	0.151138	0.0647733	0.183884	0.043542
1.21	Breast Sarcoma	Cancer diseases	19	1	TCF20	http://www.malacards.org/card/breast_sarcoma					0.359593	0.174762	0.0672438	0.11435	0.0539389
1.21	Spindle Cell Thymoma	Immune diseases, Cancer diseases	19	1	BCL2	http://www.malacards.org/card/spindle_cell_thymoma					0.359383	0.0152379	0.0822988	0.237552	0.019227
1.21	Malignant Glioma	Rare diseases	19	1	BCL2	http://www.malacards.org/card/malignant_glioma					0.359383	0.0152379	0.0822988	0.237552	0.019227
1.33	Paracoccidioidomycosis	Skin diseases, Bone diseases, Immune diseases, Rare diseases, Infectious diseases	12	1	GLO1	http://www.malacards.org/card/paracoccidioidomycosis					0.359098	0.131071	0.131789	0.1993	0.0535057
1.27	Integumentary System Benign Neoplasm	Skin diseases, Cancer diseases	15	1	CTNNB1	http://www.malacards.org/card/integumentary_system_benign_neoplasm					0.359058	0.231951	0.000275038	0.237337	0.018312
1.3	Cone Dystrophy	Eye diseases, Rare diseases	13	1	RPGR	http://www.malacards.org/card/cone_dystrophy					0.358972	0.174819	0.0847174	0.204973	0.0793328
1.36	Bladder Squamous Cell Carcinoma	Skin diseases, Nephrological diseases, Cancer diseases	11	1	SERPINB6	http://www.malacards.org/card/bladder_squamous_cell_carcinoma					0.358881	0.195949	0.11556	0.199179	0.0373236
1.31	Pleurisy	Respiratory diseases	13	1	SLC11A1	http://www.malacards.org/card/pleurisy					0.358264	0.188447	0.029306	0.219257	0.0162652
1.21	Encephalocele	Neuronal diseases, Rare diseases, Fetal diseases	19	1	KIF14	http://www.malacards.org/card/encephalocele					0.358025	0.0716049	0.0673086	0.282481	0.143568
1.46	Shoulder Impingement Syndrome	Bone diseases	8	1	SKIL	http://www.malacards.org/card/shoulder_impingement_syndrome					0.357941	0.0429529	0.0519015	0.256644	0.0198657
1.02	Meningioma, Familial	Endocrine diseases, Neuronal diseases, Cancer diseases, Rare diseases, Genetic diseases	48	1	MGEA5	http://www.malacards.org/card/meningioma_familial					0.357908	0.13851	0.0450964	0.197923	0.0112025
1.46	Phosphorylase Kinase Deficiency	Genetic diseases	8	1	NEK3	http://www.malacards.org/card/phosphorylase_kinase_deficiency					0.357874	0.118814	0.173927	0.142076	0.129908
1.2	Ectopic Thymus	Immune diseases	20	1	BCL2	http://www.malacards.org/card/ectopic_thymus					0.35748	0.0151572	0.0818629	0.236294	0.0191252
1.32	Spasticity		12	1	TECPR2	http://www.malacards.org/card/spasticity					0.35733	0.0961218	0.234051	0.11649	0.0900472
1.46	Amyotrophic Lateral Sclerosis Type 5	Neuronal diseases, Mental diseases, Rare diseases, Genetic diseases	7	1	ALS2	http://www.malacards.org/card/amyotrophic_lateral_sclerosis_type_5					0.35701	0.127809	0.203139	0.108174	0.0985347
2.58	Hypothyroidism, Congenital, Due to Thyroid Dysgenesis or Hypoplasia	Endocrine diseases, Immune diseases, Rare diseases, Genetic diseases	8	1	SLC26A4	http://www.malacards.org/card/hypothyroidism_congenital_due_to_thyroid_dysgenesis_or_hypoplasia	Causative germline mutation	SLC26A4			0.356461	0.149714	0.064163	0.182152	0.0431318
1.14	Cardiac Arrest	Cardiovascular diseases	25	1	CALM1	http://www.malacards.org/card/cardiac_arrest					0.356001	0.1602	0.0729801	0.150588	0.0971882
1.19	Laryngeal Carcinoma	Oral diseases, Respiratory diseases, Cancer diseases, Rare diseases	21	1	BCL2	http://www.malacards.org/card/laryngeal_carcinoma					0.355564	0.0150759	0.0814241	0.235028	0.0190227
1.5	Intraductal Papilloma	Cancer diseases	7	1	DOCK4	http://www.malacards.org/card/intraductal_papilloma					0.355139	0.0692521	0.0294766	0.117196	0.152355
1.29	Typhoid Fever	Gastrointestinal diseases, Rare diseases, Infectious diseases	14	1	SLC11A1	http://www.malacards.org/card/typhoid_fever					0.354883	0.186669	0.0290295	0.217189	0.0161117
1.29	Brucellosis	Rare diseases, Infectious diseases	14	1	SLC11A1	http://www.malacards.org/card/brucellosis					0.354883	0.186669	0.0290295	0.217189	0.0161117
1.26	Megalencephaly	Neuronal diseases, Rare diseases, Fetal diseases	15	1	RNASET2	http://www.malacards.org/card/megalencephaly					0.354301	0.246948	0.0442877	0.180694	0.01853
1.27	Lipid Pneumonia	Respiratory diseases, Rare diseases	15	1	FLT1	http://www.malacards.org/card/lipid_pneumonia					0.354216	0.193048	0.0207217	0.251139	0.0690722
1.27	Acute Hemorrhagic Leukoencephalitis	Neuronal diseases, Rare diseases	15	1	FLT1	http://www.malacards.org/card/acute_hemorrhagic_leukoencephalitis					0.354216	0.193048	0.0207217	0.251139	0.0690722
1.2	Pilomyxoid Astrocytoma	Neuronal diseases, Cancer diseases, Rare diseases	20	1	KIAA1549	http://www.malacards.org/card/pilomyxoid_astrocytoma					0.353727	0.147504	0.0565963	0.103288	0.0707454
1.24	Familial Adenomatous Polyposis	Gastrointestinal diseases, Cancer diseases, Rare diseases, Genetic diseases	17	1	CTNNB1	http://www.malacards.org/card/familial_adenomatous_polyposis					0.353713	0.228499	0.000270944	0.233804	0.0180394
1.5	Conventional Central Osteosarcoma	Bone diseases, Cancer diseases	6	1	CYP4V2	http://www.malacards.org/card/conventional_central_osteosarcoma					0.352979	0.117542	0.170136	0.146486	0.0313799
1.5	Telangiectatic Osteogenic Sarcoma	Bone diseases, Cancer diseases	2	1	CYP4V2	http://www.malacards.org/card/telangiectatic_osteogenic_sarcoma					0.352979	0.117542	0.170136	0.146486	0.0313799
1.5	Bone Osteosarcoma	Bone diseases, Cancer diseases	7	1	CYP4V2	http://www.malacards.org/card/bone_osteosarcoma					0.352979	0.117542	0.170136	0.146486	0.0313799
1.5	Choroidal Sclerosis	Eye diseases, Neuronal diseases	5	1	CYP4V2	http://www.malacards.org/card/choroidal_sclerosis					0.352979	0.117542	0.170136	0.146486	0.0313799
1.36	Disuse Amblyopia	Eye diseases	11	1	GRM1	http://www.malacards.org/card/disuse_amblyopia					0.352755	0.0776061	0.0207773	0.1344	0.0391558
1.39	Patau Syndrome	Eye diseases, Nephrological diseases, Rare diseases, Fetal diseases, Genetic diseases	10	1	SIX3	http://www.malacards.org/card/patau_syndrome					0.352556	0.208713	0.0592294	0.167817	0.0659279
1.14	Wiskott-Aldrich Syndrome	Skin diseases, Immune diseases, Blood diseases, Cancer diseases, Rare diseases, Genetic diseases	25	1	WASF3	http://www.malacards.org/card/wiskott_aldrich_syndrome					0.352345	0.17124	0.0644792	0.107113	0.0227615
1.39	Hennekam Syndrome	Skin diseases, Neuronal diseases, Immune diseases, Cardiovascular diseases, Blood diseases, Rare diseases, Fetal diseases, Genetic diseases	8	1	PROX1	http://www.malacards.org/card/hennekam_syndrome					0.352179	0.153198	0.0230677	0.0802968	0.133124
1.39	Lymphangioma	Immune diseases, Cancer diseases, Rare diseases	10	1	PROX1	http://www.malacards.org/card/lymphangioma					0.352179	0.153198	0.0230677	0.0802968	0.133124
1.26	Subcorneal Pustular Dermatosis	Skin diseases, Rare diseases	16	1	DSC2	http://www.malacards.org/card/subcorneal_pustular_dermatosis					0.351875	0.235405	0.125971	0.100636	0.05067
1.42	Amyotrophic Lateral Sclerosis Type 10	Neuronal diseases, Mental diseases, Rare diseases, Genetic diseases	8	1	ALS2	http://www.malacards.org/card/amyotrophic_lateral_sclerosis_type_10					0.351278	0.125757	0.199877	0.106437	0.0969527
1.28	Birdshot Chorioretinopathy	Eye diseases, Rare diseases	14	1	TECPR2	http://www.malacards.org/card/birdshot_chorioretinopathy					0.350618	0.0943162	0.229655	0.114301	0.0883557
1.01	Leukemia	Immune diseases, Cancer diseases	51	1	RUNX1T1	http://www.malacards.org/card/leukemia					0.350597	0.17004	0.00911552	0.145498	0.0410198
1.25	Paraneoplastic Pemphigus	Skin diseases, Rare diseases	16	1	DSC2	http://www.malacards.org/card/paraneoplastic_pemphigus					0.350121	0.234231	0.125343	0.100135	0.0504174
1.22	Primary Pigmented Nodular Adrenocortical Disease	Endocrine diseases, Reproductive diseases, Rare diseases, Genetic diseases	15	1	CTNNB1	http://www.malacards.org/card/primary_pigmented_nodular_adrenocortical_disease					0.350088	0.226157	0.000268167	0.231408	0.0178545
1.09	Cholangiocarcinoma	Gastrointestinal diseases, Liver diseases, Cancer diseases, Rare diseases, Genetic diseases	34	1	CDKN1B	http://www.malacards.org/card/cholangiocarcinoma					0.349282	0.209569	0.043311	0.123646	0.0670622
1.31	Cecal Disease	Gastrointestinal diseases	13	1	LIAS	http://www.malacards.org/card/cecal_disease					0.349146	0.170733	0.0991575	0.200061	0.101252
1.24	Epithelioid Hemangioendothelioma	Cardiovascular diseases, Cancer diseases, Rare diseases, Fetal diseases	16	1	FLT1	http://www.malacards.org/card/epithelioid_hemangioendothelioma					0.348944	0.190174	0.0204132	0.247401	0.0680441
1.24	Alstrom Syndrome	Endocrine diseases, Eye diseases, Ear diseases, Rare diseases, Fetal diseases, Genetic diseases	16	1	RPGR	http://www.malacards.org/card/alstrom_syndrome					0.348547	0.169742	0.0822571	0.19902	0.0770289
1.21	Adenomatous Polyposis Coli	Skin diseases, Eye diseases, Neuronal diseases, Bone diseases, Gastrointestinal diseases, Cancer diseases, Rare diseases, Fetal diseases, Genetic diseases	17	1	CTNNB1	http://www.malacards.org/card/adenomatous_polyposis_coli					0.348256	0.224974	0.000266764	0.230197	0.0177611
1.33	Periventricular Leukomalacia	Neuronal diseases, Rare diseases	12	1	GRM1	http://www.malacards.org/card/periventricular_leukomalacia					0.348024	0.0765654	0.0204986	0.132597	0.0386307
1.36	Dyskinetic Cerebral Palsy	Neuronal diseases	11	1	SIX3	http://www.malacards.org/card/dyskinetic_cerebral_palsy					0.347985	0.206007	0.0584615	0.165641	0.0650732
1.15	Burkitt Lymphoma	Immune diseases, Blood diseases, Cancer diseases, Rare diseases, Genetic diseases	24	1	BCL2	http://www.malacards.org/card/burkitt_lymphoma					0.347763	0.0147452	0.0796378	0.229872	0.0186053
1.36	Skin Hemangioma	Skin diseases, Cancer diseases	11	1	PROX1	http://www.malacards.org/card/skin_hemangioma					0.347613	0.151212	0.0227687	0.0792558	0.131398
1.22	Early Myoclonic Encephalopathy	Neuronal diseases, Rare diseases, Metabolic diseases	17	1	ARX	http://www.malacards.org/card/early_myoclonic_encephalopathy					0.347399	0.151466	0.0601001	0.206355	0.00496781
0.89	Leigh Syndrome	Rare diseases, Genetic diseases, Metabolic diseases	89	1	SERAC1	http://www.malacards.org/card/leigh_syndrome_nuclear_dna_mutation					0.34738	0.18029	0.0719077	0.229966	0.0847608
1.17	Lymphatic System Disease	Immune diseases	23	1	NPC1	http://www.malacards.org/card/lymphatic_system_disease					0.347353	0.0948275	0.116016	0.223348	0.0437665
1.39	Neurofibromatosis, Type 1	Skin diseases, Eye diseases, Neuronal diseases, Ear diseases, Cardiovascular diseases, Nephrological diseases, Cancer diseases, Rare diseases, Fetal diseases, Genetic diseases	9	1	MLH1	http://www.malacards.org/card/neurofibromatosis_type_1					0.346697	0.0634455	0.127931	0.184096	0.0264876
1.39	Gastric Leiomyoma	Gastrointestinal diseases, Cancer diseases	10	1	MLH1	http://www.malacards.org/card/gastric_leiomyoma					0.346697	0.0634455	0.127931	0.184096	0.0264876
1.2	Hepatoblastoma	Gastrointestinal diseases, Liver diseases, Cancer diseases, Rare diseases	20	1	CTNNB1	http://www.malacards.org/card/hepatoblastoma					0.346412	0.223782	0.000265352	0.228978	0.017667
1.2	Cystitis Cystica		20	1	CTNNB1	http://www.malacards.org/card/cystitis_cystica					0.346412	0.223782	0.000265352	0.228978	0.017667
1.24	Juvenile Rheumatoid Arthritis	Bone diseases, Rare diseases, Genetic diseases	17	1	SLC11A1	http://www.malacards.org/card/juvenile_rheumatoid_arthritis					0.346224	0.182114	0.0283211	0.211889	0.0157186
1.24	Visceral Leishmaniasis	Infectious diseases	17	1	SLC11A1	http://www.malacards.org/card/visceral_leishmaniasis					0.346224	0.182114	0.0283211	0.211889	0.0157186
1.14	Diffuse Large B-Cell Lymphoma	Immune diseases, Blood diseases, Cancer diseases, Rare diseases	26	1	BCL2	http://www.malacards.org/card/diffuse_large_b_cell_lymphoma					0.345779	0.014661	0.0791834	0.22856	0.0184992
1.44	Thoracic Aortic Aneurysms and Aortic Dissections	Genetic diseases	8	1	MYLK	http://www.malacards.org/card/thoracic_aortic_aneurysms_and_aortic_dissections					0.345526	0.105731	0.0113333	0.22632	0.0805076
1.36	Intestinal Schistosomiasis	Gastrointestinal diseases, Infectious diseases	11	1	THBS2	http://www.malacards.org/card/intestinal_schistosomiasis					0.345364	0.157831	0.127785	0.0649284	0.0790883
1.36	Spinal Stenosis	Neuronal diseases, Bone diseases	11	1	THBS2	http://www.malacards.org/card/spinal_stenosis					0.345364	0.157831	0.127785	0.0649284	0.0790883
1.36	Back Pain		11	1	THBS2	http://www.malacards.org/card/back_pain					0.345364	0.157831	0.127785	0.0649284	0.0790883
2.83	Trichothiodystrophy 4, Nonphotosensitive	Neuronal diseases, Rare diseases, Genetic diseases	1	1	MPLKIP	http://www.malacards.org/card/trichothiodystrophy_4_nonphotosensitive	Pathogenic, Causative mutation Ð Humsavar, Genetic Tests, Molecular basis known	MPLKIP			0.345208	0.0322079	0.213684	0.105634	0.113919
1.31	Spinocerebellar Ataxia 28	Skin diseases, Eye diseases, Neuronal diseases, Ear diseases, Mental diseases, Rare diseases, Genetic diseases, Metabolic diseases	12	1	GRM1	http://www.malacards.org/card/spinocerebellar_ataxia_28					0.344816	0.0758594	0.0203096	0.131375	0.0382745
1.19	Persistent Mullerian Duct Syndrome	Endocrine diseases, Reproductive diseases, Rare diseases, Fetal diseases, Genetic diseases	19	1	CTNNB1	http://www.malacards.org/card/persistent_mullerian_duct_syndrome					0.344555	0.222582	0.000263929	0.227751	0.0175723
1.19	Infratentorial Cancer	Neuronal diseases, Cancer diseases	21	1	CTNNB1	http://www.malacards.org/card/infratentorial_cancer					0.344555	0.222582	0.000263929	0.227751	0.0175723
1.23	Lymphadenitis	Skin diseases, Immune diseases	18	1	SLC11A1	http://www.malacards.org/card/lymphadenitis					0.344456	0.181184	0.0281765	0.210807	0.0156383
1.27	Gnathomiasis	Infectious diseases	15	1	SERPINB6	http://www.malacards.org/card/gnathomiasis					0.344137	0.187899	0.110812	0.190996	0.0357903
1.27	Parotid Gland Cancer	Endocrine diseases, Oral diseases, Cancer diseases	15	1	SERPINB6	http://www.malacards.org/card/parotid_gland_cancer					0.344137	0.187899	0.110812	0.190996	0.0357903
1.37	Brown-Vialetto-Van Laere Syndrome	Ear diseases, Genetic diseases	10	1	ALS2	http://www.malacards.org/card/brown_vialetto_van_laere_syndrome					0.343886	0.123111	0.195671	0.104197	0.0949125
1.13	Nasopharyngeal Carcinoma	Respiratory diseases, Cancer diseases, Rare diseases, Genetic diseases	27	1	BCL2	http://www.malacards.org/card/nasopharyngeal_carcinoma					0.343781	0.0145763	0.0787259	0.227239	0.0183923
1.2	Histiocytoid Hemangioma	Cancer diseases	20	1	ARX	http://www.malacards.org/card/histiocytoid_hemangioma					0.343752	0.149876	0.059469	0.204188	0.00491565
1.15	Lipid Storage Disease	Metabolic diseases	25	1	NPC1	http://www.malacards.org/card/lipid_storage_disease					0.343475	0.0937686	0.114721	0.220854	0.0432778
1.33	Encephalomalacia	Neuronal diseases	12	1	SIX3	http://www.malacards.org/card/encephalomalacia					0.343319	0.203245	0.0576775	0.16342	0.0642006
2.33	Pendred Syndrome/dfnb4	Ear diseases, Genetic diseases	3	1	SLC26A4	http://www.malacards.org/card/pendred_syndrome_dfnb4	Genetic Tests	SLC26A4			0.342916	0.144025	0.0617249	0.17523	0.0414929
2.33	Slc26a4-Related Pendred Syndrome	Endocrine diseases, Ear diseases, Rare diseases, Fetal diseases, Genetic diseases	1	1	SLC26A4	http://www.malacards.org/card/slc26a4_related_pendred_syndrome	Genetic Tests	SLC26A4			0.342916	0.144025	0.0617249	0.17523	0.0414929
1.42	Giardiasis	Infectious diseases	9	1	MYLK	http://www.malacards.org/card/giardiasis					0.342711	0.10487	0.0112409	0.224476	0.0798517
1.22	Angina Pectoris	Cardiovascular diseases	31	1	SLC11A1	http://www.malacards.org/card/angina_pectoris			Blood	SLC11A1	0.342676	0.180247	0.0280309	0.209717	0.0155575
1.34	Intervertebral Disc Disease	Rare diseases, Genetic diseases	12	1	THBS2	http://www.malacards.org/card/intervertebral_disc_disease					0.342287	0.156425	0.126646	0.0643499	0.0783837
1.36	Ovarian Clear Cell Carcinoma	Reproductive diseases, Cancer diseases, Rare diseases	11	1	MLH1	http://www.malacards.org/card/ovarian_clear_cell_carcinoma					0.342202	0.062623	0.126273	0.181709	0.0261442
1.36	Keratoacanthoma	Skin diseases, Eye diseases, Cancer diseases, Rare diseases, Genetic diseases	11	1	MLH1	http://www.malacards.org/card/keratoacanthoma					0.342202	0.062623	0.126273	0.181709	0.0261442
1.23	Diabetic Neuropathy	Neuronal diseases	18	1	GLO1	http://www.malacards.org/card/diabetic_neuropathy					0.342075	0.124857	0.125542	0.189852	0.0509692
1.42	Eye Degenerative Disease	Eye diseases, Neuronal diseases	9	1	CYP4V2	http://www.malacards.org/card/eye_degenerative_disease					0.341972	0.113877	0.164831	0.141918	0.0304013
1.26	Adrenal Carcinoma	Endocrine diseases, Cancer diseases, Rare diseases	16	1	LIAS	http://www.malacards.org/card/adrenal_carcinoma					0.340824	0.166663	0.0967939	0.195292	0.0988389
1.19	Eclampsia	Cardiovascular diseases, Rare diseases	21	1	FLT1	http://www.malacards.org/card/eclampsia					0.339909	0.18525	0.0198847	0.240995	0.0662822
1.19	Dowling-Degos Disease	Skin diseases, Rare diseases, Genetic diseases, Metabolic diseases	18	1	DSC2	http://www.malacards.org/card/dowling_degos_disease					0.339334	0.227015	0.121482	0.0970496	0.0488641
2.26	Deafness, Autosomal Recessive 4, with Enlarged Vestibular Aqueduct	Neuronal diseases, Ear diseases, Rare diseases, Genetic diseases	16	1	SLC26A4	http://www.malacards.org/card/deafness_autosomal_recessive_4_with_enlarged_vestibular_aqueduct	Causative mutation Ð Humsavar, Molecular basis known	SLC26A4			0.338684	0.142247	0.0609631	0.173067	0.0409807
1.04	Urinary Bladder Cancer	Nephrological diseases, Cancer diseases, Rare diseases	42	1	CDKN1B	http://www.malacards.org/card/urinary_bladder_cancer					0.33837	0.203022	0.0419579	0.119783	0.064967
1.18	Retinal Vascular Disease	Eye diseases, Cardiovascular diseases	22	1	FLT1	http://www.malacards.org/card/retinal_vascular_disease					0.338064	0.184245	0.0197767	0.239687	0.0659225
1.1	Hodgkin Lymphoma	Immune diseases, Blood diseases, Cancer diseases, Rare diseases, Genetic diseases	31	1	BCL2	http://www.malacards.org/card/hodgkin_lymphoma					0.337704	0.0143186	0.0773342	0.223222	0.0180672
1.18	Stargardt Disease	Eye diseases, Rare diseases, Genetic diseases	18	1	RPGR	http://www.malacards.org/card/stargardt_disease					0.33768	0.16445	0.0796924	0.192815	0.0746272
1.46	Acute Maxillary Sinusitis	Respiratory diseases	8	1	GAS6	http://www.malacards.org/card/acute_maxillary_sinusitis					0.337116	0.114282	0.0606809	0.177997	0.0654006
2.22	Pendred Syndrome	Endocrine diseases, Ear diseases, Rare diseases, Fetal diseases, Genetic diseases	18	1	SLC26A4	http://www.malacards.org/card/pendred_syndrome	Causative mutation Ð Humsavar, Molecular basis known, Causative germline mutation	SLC26A4			0.336171	0.141192	0.0605108	0.171784	0.0406767
1.31	Muscle Glycogenosis	Genetic diseases	12	1	NEK3	http://www.malacards.org/card/muscle_glycogenosis					0.335481	0.11138	0.163044	0.133186	0.121779
1.14	Intrahepatic Cholangiocarcinoma	Gastrointestinal diseases, Liver diseases, Cancer diseases, Rare diseases	27	1	CTNNB1	http://www.malacards.org/card/intrahepatic_cholangiocarcinoma					0.335073	0.216457	0.000256666	0.221484	0.0170887
1.22	Glycine Encephalopathy	Neuronal diseases, Rare diseases, Genetic diseases, Metabolic diseases	16	1	LIAS	http://www.malacards.org/card/glycine_encephalopathy					0.333955	0.163304	0.0948431	0.191356	0.0968469
1.27	Urethral Diverticulum	Nephrological diseases	15	1	MCU	http://www.malacards.org/card/urethral_diverticulum					0.333754	0.122488	0.0640808	0.196581	0.0620783
1.46	Intestinal Atresia	Gastrointestinal diseases	8	1	TTC7A	http://www.malacards.org/card/intestinal_atresia					0.333449	0.0308774	0.0172393	0.197402	0.066023
2.57	Congenital Disorder of Glycosylation, Type in	Neuronal diseases, Gastrointestinal diseases, Liver diseases, Blood diseases, Muscle diseases, Rare diseases, Genetic diseases, Metabolic diseases	10	1	RFT1	http://www.malacards.org/card/congenital_disorder_of_glycosylation_type_in	Pathogenic, Causative mutation Ð Humsavar, Molecular basis known	RFT1			0.333339	0.119669	0.146669	0.0770014	0.102002
1.27	Lymphedema	Immune diseases, Rare diseases, Genetic diseases	15	1	PROX1	http://www.malacards.org/card/lymphedema					0.333332	0.145	0.0218333	0.0759998	0.126
1.12	Intrahepatic Cholestasis	Gastrointestinal diseases, Reproductive diseases, Liver diseases, Rare diseases, Genetic diseases, Metabolic diseases	26	1	TMEM30A	http://www.malacards.org/card/intrahepatic_cholestasis					0.33325	0.0713155	0.174623	0.183288	0.105307
1.13	Organ System Benign Neoplasm	Cancer diseases	28	1	CTNNB1	http://www.malacards.org/card/organ_system_benign_neoplasm					0.333137	0.215207	0.000255183	0.220204	0.01699
1.46	Cortical Blindness	Eye diseases	8	1	DOCK7	http://www.malacards.org/card/cortical_blindness					0.33261	0.0994505	0.0146016	0.197571	0.00508894
1.46	Visual Cortex Disease	Eye diseases	8	1	DOCK7	http://www.malacards.org/card/visual_cortex_disease					0.33261	0.0994505	0.0146016	0.197571	0.00508894
1.5	Postaxial Polydactyly, Type A2	Skin diseases, Bone diseases, Rare diseases, Fetal diseases, Genetic diseases	3	1	DACH1	http://www.malacards.org/card/postaxial_polydactyly_type_a2					0.332474	0.13033	0.0578505	0.177541	0.0585154
1.26	Acute Cystitis	Nephrological diseases	16	1	MCU	http://www.malacards.org/card/acute_cystitis					0.33211	0.121884	0.0637651	0.195613	0.0617724
1.15	Myopia	Eye diseases, Rare diseases, Genetic diseases	24	1	RPGR	http://www.malacards.org/card/myopia					0.332074	0.16172	0.0783695	0.189614	0.0733884
1.26	Holoprosencephaly	Endocrine diseases, Neuronal diseases, Rare diseases, Fetal diseases, Genetic diseases	15	1	SIX3	http://www.malacards.org/card/holoprosencephaly					0.332045	0.196571	0.0557836	0.158053	0.0620924
1.23	Progesterone-Receptor Positive Breast Cancer	Cancer diseases	18	1	GRM1	http://www.malacards.org/card/progesterone_receptor_positive_breast_cancer					0.331526	0.0729357	0.0195269	0.126311	0.0367994
1.29	Amyotrophic Lateral Sclerosis 7	Neuronal diseases, Mental diseases, Rare diseases, Genetic diseases	14	1	ALS2	http://www.malacards.org/card/amyotrophic_lateral_sclerosis_7					0.331513	0.118682	0.188631	0.100448	0.0914976
1.29	Hereditary Colorectal Cancer	Gastrointestinal diseases, Cancer diseases, Rare diseases, Genetic diseases	14	1	MLH1	http://www.malacards.org/card/hereditary_colorectal_cancer					0.331344	0.060636	0.122266	0.175944	0.0253147
1.29	Cecum Adenocarcinoma	Cancer diseases	14	1	MLH1	http://www.malacards.org/card/cecum_adenocarcinoma					0.331344	0.060636	0.122266	0.175944	0.0253147
1.17	Benign Familial Infantile Epilepsy	Neuronal diseases, Rare diseases, Genetic diseases	19	1	VRK2	http://www.malacards.org/card/benign_familial_infantile_epilepsy					0.330978	0.0374006	0.109223	0.130737	0.108561
1.08	Astrocytoma	Neuronal diseases, Cancer diseases	35	1	KIAA1549	http://www.malacards.org/card/astrocytoma					0.330079	0.137643	0.0528127	0.0963831	0.0660158
1.14	Intrinsic Cardiomyopathy	Cardiovascular diseases	26	1	DSC2	http://www.malacards.org/card/intrinsic_cardiomyopathy					0.329997	0.220768	0.118139	0.094379	0.0475195
1.28	Amyotrophic Lateral Sclerosis-Parkinsonism/dementia Complex	Neuronal diseases, Mental diseases, Rare diseases, Genetic diseases	13	1	ALS2	http://www.malacards.org/card/amyotrophic_lateral_sclerosis_parkinsonism_dementia_complex					0.329917	0.11811	0.187723	0.099965	0.0910572
1.15	Sarcoidosis 1	Endocrine diseases, Eye diseases, Neuronal diseases, Bone diseases, Immune diseases, Respiratory diseases, Nephrological diseases, Rare diseases, Genetic diseases	24	1	SLC11A1	http://www.malacards.org/card/sarcoidosis_1					0.329861	0.173507	0.0269826	0.201875	0.0149757
1.39	Chronic Polyneuropathy	Neuronal diseases	10	1	TTK	http://www.malacards.org/card/chronic_polyneuropathy					0.329621	0.0418619	0.065265	0.178325	0.125586
1.06	Myeloma	Neuronal diseases, Immune diseases, Blood diseases, Cancer diseases, Rare diseases, Genetic diseases	38	1	BCL2	http://www.malacards.org/card/myeloma					0.329401	0.0139666	0.0754329	0.217734	0.017623
1.33	Subdural Empyema	Neuronal diseases	12	1	CYP4V2	http://www.malacards.org/card/subdural_empyema					0.328837	0.109503	0.158499	0.136467	0.0292336
1.24	Bladder Diverticulum	Nephrological diseases	17	1	MCU	http://www.malacards.org/card/bladder_diverticulum					0.328786	0.120665	0.063127	0.193655	0.0611542
1.13	Exudative Vitreoretinopathy 1	Eye diseases, Neuronal diseases, Rare diseases, Genetic diseases	25	1	FLT1	http://www.malacards.org/card/exudative_vitreoretinopathy_1					0.328645	0.179112	0.0192258	0.23301	0.0640859
1.27	Malignant Ovarian Brenner Tumor	Cancer diseases, Rare diseases	15	1	MLH1	http://www.malacards.org/card/malignant_ovarian_brenner_tumor					0.328144	0.0600503	0.121085	0.174244	0.0250702
1.39	Mesangial Proliferative Glomerulonephritis	Nephrological diseases, Rare diseases	10	1	GAS6	http://www.malacards.org/card/mesangial_proliferative_glomerulonephritis					0.327545	0.111038	0.0589581	0.172944	0.0635437
1.42	Visual Pathway Disease	Eye diseases	9	1	DOCK7	http://www.malacards.org/card/visual_pathway_disease					0.32727	0.0978538	0.0143672	0.194399	0.00500723
1.23	Ureteral Disease	Nephrological diseases	18	1	MCU	http://www.malacards.org/card/ureteral_disease					0.327107	0.120048	0.0628046	0.192666	0.0608419
1.23	Dubowitz Syndrome	Skin diseases, Eye diseases, Neuronal diseases, Mental diseases, Rare diseases, Fetal diseases, Genetic diseases	16	1	SIX3	http://www.malacards.org/card/dubowitz_syndrome					0.327043	0.19361	0.0549433	0.155673	0.0611571
1.12	Pre-Eclampsia	Cardiovascular diseases, Rare diseases	29	1	FLT1	http://www.malacards.org/card/pre_eclampsia					0.326722	0.178064	0.0191132	0.231646	0.0637108
1.23	Lymphangiosarcoma	Skin diseases, Immune diseases, Cancer diseases, Rare diseases	18	1	PROX1	http://www.malacards.org/card/lymphangiosarcoma					0.326694	0.142112	0.0213984	0.0744862	0.12349
1.26	Skin Benign Neoplasm	Skin diseases, Eye diseases, Ear diseases, Cancer diseases	16	1	MLH1	http://www.malacards.org/card/skin_benign_neoplasm					0.326527	0.0597544	0.120488	0.173386	0.0249466
1.13	Leprosy	Skin diseases, Eye diseases, Neuronal diseases, Reproductive diseases, Rare diseases, Genetic diseases, Infectious diseases	27	1	SLC11A1	http://www.malacards.org/card/leprosy					0.326084	0.17152	0.0266737	0.199563	0.0148042
1.22	3-Methylcrotonyl-Coa Carboxylase Deficiency	Rare diseases, Genetic diseases, Metabolic diseases	17	1	SIX3	http://www.malacards.org/card/3_methylcrotonyl_coa_carboxylase_deficiency					0.325353	0.192609	0.0546593	0.154868	0.060841
1.06	Inherited Metabolic Disorder	Rare diseases, Metabolic diseases	39	1	NPC1	http://www.malacards.org/card/inherited_metabolic_disorder					0.325339	0.0888176	0.108663	0.209193	0.0409928
1.04	Lymphoma	Eye diseases, Neuronal diseases, Immune diseases, Cancer diseases, Rare diseases	44	1	BCL2	http://www.malacards.org/card/lymphoma					0.325163	0.0137869	0.0744624	0.214933	0.0173962
1.25	Spinal Muscular Atrophy-1	Neuronal diseases, Muscle diseases, Rare diseases, Genetic diseases	12	1	ALS2	http://www.malacards.org/card/spinal_muscular_atrophy_1_2					0.325064	0.116373	0.184962	0.0984945	0.0897177
1.11	Microvascular Complications of Diabetes 5	Eye diseases, Neuronal diseases, Nephrological diseases, Genetic diseases	31	1	FLT1	http://www.malacards.org/card/microvascular_complications_of_diabetes_5					0.324786	0.177008	0.019	0.230273	0.0633332
1.29	Reading Disorder	Mental diseases, Fetal diseases	14	1	DOCK4	http://www.malacards.org/card/reading_disorder					0.324705	0.0633175	0.0269505	0.107153	0.139299
1.21	Chronic Maxillary Sinusitis	Respiratory diseases	19	1	SCD5	http://www.malacards.org/card/chronic_maxillary_sinusitis					0.324406	0.0684497	0.0995927	0.10381	0.0749378
1.29	Myoma	Cancer diseases	14	1	MYLK	http://www.malacards.org/card/myoma					0.323428	0.098969	0.0106084	0.211845	0.0753587
1.24	Spinocerebellar Ataxia, Autosomal Recessive 1	Skin diseases, Eye diseases, Neuronal diseases, Ear diseases, Mental diseases, Rare diseases, Genetic diseases, Metabolic diseases	15	1	ALS2	http://www.malacards.org/card/spinocerebellar_ataxia_autosomal_recessive_1_2					0.323424	0.115786	0.184028	0.0979975	0.089265
1.5	Sarcoglycanopathies	Muscle diseases, Rare diseases, Genetic diseases	7	1	SGCB	http://www.malacards.org/card/sarcoglycanopathies					0.323071	0.100152	0.147644	0.0355379	0.122444
1.1	Preeclampsia/eclampsia 1	Reproductive diseases, Rare diseases, Genetic diseases	32	1	FLT1	http://www.malacards.org/card/preeclampsia_eclampsia_1					0.322836	0.175945	0.0188859	0.22889	0.0629529
1.18	Maple Syrup Urine Disease, Type Ii	Nephrological diseases, Rare diseases, Genetic diseases, Metabolic diseases	18	1	PPM1K	http://www.malacards.org/card/maple_syrup_urine_disease_type_ii					0.322807	0.0994245	0.00703719	0.238554	0.075214
1.5	Glaucoma, Normal Tension	Genetic diseases	6	1	VAV2	http://www.malacards.org/card/glaucoma_normal_tension					0.322447	0.054816	0.0341794	0.0667465	0.0509466
1.29	Spinocerebellar Ataxia 14	Skin diseases, Eye diseases, Neuronal diseases, Ear diseases, Mental diseases, Rare diseases, Genetic diseases, Metabolic diseases	13	1	ATG5	http://www.malacards.org/card/spinocerebellar_ataxia_14					0.322208	0.237467	0.0376983	0.122439	0.0592862
1.5	Optic Atrophy 1	Eye diseases, Neuronal diseases, Ear diseases, Rare diseases, Genetic diseases	5	1	DNM3	http://www.malacards.org/card/optic_atrophy_1					0.321619	0.170458	0.0385943	0.0845858	0.100024
1.23	Small Intestine Lymphoma	Immune diseases, Gastrointestinal diseases, Cancer diseases	18	1	MLH1	http://www.malacards.org/card/small_intestine_lymphoma					0.321608	0.0588543	0.118673	0.170774	0.0245709
1.07	Colitis	Gastrointestinal diseases	37	1	CTNNB1	http://www.malacards.org/card/colitis					0.321235	0.207518	0.000246066	0.212336	0.016383
1.07	Thyroid Cancer, Monmedullary, 1	Endocrine diseases, Cancer diseases, Rare diseases, Genetic diseases	39	1	CTNNB1	http://www.malacards.org/card/thyroid_cancer_monmedullary_1					0.321235	0.207518	0.000246066	0.212336	0.016383
2.31	Trichothiodystrophy 1, Photosensitive	Skin diseases, Neuronal diseases, Mental diseases, Rare diseases, Genetic diseases	15	1	MPLKIP	http://www.malacards.org/card/trichothiodystrophy_1_photosensitive	Pathogenic	MPLKIP			0.320693	0.0299207	0.198509	0.0981322	0.105829
1.19	Bladder Disease	Nephrological diseases	21	1	MCU	http://www.malacards.org/card/bladder_disease					0.320273	0.11754	0.0614925	0.188641	0.0595708
1.19	Periventricular Nodular Heterotopia	Neuronal diseases, Blood diseases, Rare diseases, Fetal diseases, Genetic diseases	18	1	SIX3	http://www.malacards.org/card/periventricular_nodular_heterotopia					0.320211	0.189565	0.0537954	0.15242	0.0598794
1.5	Roberts Syndrome	Eye diseases, Bone diseases, Rare diseases, Fetal diseases, Genetic diseases	6	1	DDX11	http://www.malacards.org/card/roberts_syndrome					0.320061	0.188196	0.003143	0.15523	0.0784149
1.26	Dyslexia	Fetal diseases, Genetic diseases	15	1	DOCK4	http://www.malacards.org/card/dyslexia					0.319985	0.062397	0.0265587	0.105595	0.137273
1.27	Ulcerative Stomatitis	Oral diseases	15	1	CYP4V2	http://www.malacards.org/card/ulcerative_stomatitis					0.319613	0.106431	0.154054	0.13264	0.0284136
2.12	Autosomal Recessive Disease	Genetic diseases	40	2	MPLKIP, SLC26A4	http://www.malacards.org/card/autosomal_recessive_disease					0.319434	0.0819827	0.127614	0.130489	0.0720323
1.08	Thyroid Cancer, Nonmedullary, 2	Endocrine diseases, Cancer diseases, Rare diseases, Genetic diseases	34	1	FLT1	http://www.malacards.org/card/thyroid_cancer_nonmedullary_2					0.318895	0.173798	0.0186553	0.226096	0.0621845
1.21	Lateral Sclerosis	Neuronal diseases, Rare diseases, Genetic diseases	30	1	ALS2	http://www.malacards.org/card/lateral_sclerosis					0.318434	0.113999	0.181189	0.0964856	0.0878879
1.21	Skin Melanoma	Skin diseases, Ear diseases, Cancer diseases	19	1	MLH1	http://www.malacards.org/card/skin_melanoma					0.318272	0.0582438	0.117442	0.169002	0.024316
1.21	Larynx Cancer	Oral diseases, Respiratory diseases, Cancer diseases	19	1	MLH1	http://www.malacards.org/card/larynx_cancer					0.318272	0.0582438	0.117442	0.169002	0.024316
1.5	Variola Minor	Skin diseases, Infectious diseases	5	1	RCHY1	http://www.malacards.org/card/variola_minor					0.317721	0.0787949	0.101989	0.206519	0.0556012
1.07	Retinal Degeneration	Eye diseases, Rare diseases, Genetic diseases	37	1	RPGR	http://www.malacards.org/card/retinal_degeneration					0.316543	0.154157	0.0747042	0.180746	0.0699561
1.5	Melanoma of Soft Parts	Skin diseases, Muscle diseases, Cancer diseases, Rare diseases	6	1	FGF9	http://www.malacards.org/card/melanoma_of_soft_parts					0.316197	0.116361	0.0983373	0.0803141	0.0752549
1.5	Synovial Chondromatosis	Bone diseases, Rare diseases	3	1	FGF9	http://www.malacards.org/card/synovial_chondromatosis					0.316197	0.116361	0.0983373	0.0803141	0.0752549
1.46	Pasteurellosis	Infectious diseases	8	1	DDX11	http://www.malacards.org/card/pasteurellosis					0.31514	0.185302	0.00309467	0.152843	0.0772092
1.19	Neurofibromatosis	Skin diseases, Eye diseases, Neuronal diseases, Ear diseases, Cardiovascular diseases, Nephrological diseases, Cancer diseases, Rare diseases, Fetal diseases, Genetic diseases	19	1	MLH1	http://www.malacards.org/card/neurofibromatosis					0.314889	0.0576247	0.116194	0.167206	0.0240575
1.24	Localized Osteosarcoma	Bone diseases, Cancer diseases	17	1	CYP4V2	http://www.malacards.org/card/localized_osteosarcoma					0.314856	0.104847	0.151761	0.130665	0.0279907
1	Autosomal Recessive Non-Syndromic Intellectual Disability	Neuronal diseases, Mental diseases, Rare diseases, Fetal diseases	34	1	SRD5A3	http://www.malacards.org/card/autosomal_recessive_non_syndromic_intellectual_disability					0.314683	0.125244	0.161432	0.144754	0.082447
1.5	Vitamin B12-Responsive Methylmalonic Acidemia	Nephrological diseases, Rare diseases, Metabolic diseases	2	1	MMAA	http://www.malacards.org/card/vitamin_b12_responsive_methylmalonic_acidemia					0.314669	0.0959741	0.083702	0.123036	0.0500324
1.06	Retinal Disease	Eye diseases	40	1	RPGR	http://www.malacards.org/card/retinal_disease					0.314541	0.153181	0.0742316	0.179603	0.0695135
0.99	Differentiated Thyroid Carcinoma	Endocrine diseases, Cancer diseases, Rare diseases	47	1	BCL2	http://www.malacards.org/card/differentiated_thyroid_carcinoma					0.314307	0.0133266	0.0719762	0.207757	0.0168154
0.99	Bladder Cancer, Somatic	Nephrological diseases, Cancer diseases, Genetic diseases	56	1	BCL2	http://www.malacards.org/card/bladder_cancer_somatic					0.314307	0.0133266	0.0719762	0.207757	0.0168154
1.36	Periosteal Osteogenic Sarcoma	Bone diseases, Cancer diseases	11	1	DACH1	http://www.malacards.org/card/periosteal_osteogenic_sarcoma					0.313944	0.123066	0.0546263	0.167646	0.0552542
1.18	Rectal Neoplasm	Gastrointestinal diseases, Cancer diseases, Rare diseases	22	1	MLH1	http://www.malacards.org/card/rectal_neoplasm					0.31318	0.057312	0.115564	0.166299	0.023927
1.36	Cough Headache	Rare diseases	11	1	PTPRD	http://www.malacards.org/card/cough_headache					0.312739	0.0153868	0.0544166	0.0478491	0.0722427
1.04	Specific Developmental Disorder	Mental diseases, Fetal diseases	46	1	ARX	http://www.malacards.org/card/specific_developmental_disorder					0.312676	0.136327	0.0540929	0.185729	0.00447126
1.17	Gastritis	Gastrointestinal diseases	23	1	MLH1	http://www.malacards.org/card/gastritis					0.311459	0.056997	0.114928	0.165385	0.0237955
1.46	Spondylocostal Dysostosis	Bone diseases, Rare diseases, Fetal diseases, Genetic diseases, Metabolic diseases	7	1	MMAA	http://www.malacards.org/card/spondylocostal_dysostosis					0.309831	0.0944984	0.082415	0.121144	0.0492631
1.5	Lung Mucoepidermoid Carcinoma	Oral diseases, Respiratory diseases, Cancer diseases	6	1	ATP2C1	http://www.malacards.org/card/lung_mucoepidermoid_carcinoma					0.309663	0.145851	0.00919699	0.187036	0.0292941
1.39	Limb-Girdle Muscular Dystrophy	Neuronal diseases, Muscle diseases, Rare diseases, Genetic diseases, Metabolic diseases	15	1	SGCB	http://www.malacards.org/card/limb_girdle_muscular_dystrophy					0.309072	0.0958124	0.141246	0.033998	0.117138
1.45	Asperger Syndrome	Mental diseases, Rare diseases, Fetal diseases, Genetic diseases	13	1	NLGN4X	http://www.malacards.org/card/asperger_syndrome					0.30639	0.0876275	0.000134811	0.0572949	0.0879339
1.31	Restless Legs Syndrome	Neuronal diseases, Rare diseases	13	1	PTPRD	http://www.malacards.org/card/restless_legs_syndrome					0.3057	0.0150405	0.0531919	0.0467722	0.0706168
1.3	Branchiootorenal Syndrome	Ear diseases, Nephrological diseases, Rare diseases, Fetal diseases, Genetic diseases	11	1	DACH1	http://www.malacards.org/card/branchiootorenal_syndrome					0.305435	0.119731	0.0531458	0.163102	0.0537566
1.24	La Crosse Encephalitis	Neuronal diseases, Rare diseases, Infectious diseases	17	1	GAS6	http://www.malacards.org/card/la_crosse_encephalitis					0.305402	0.103531	0.0549724	0.161252	0.059248
1.5	Adrenomyeloneuropathy	Endocrine diseases, Neuronal diseases, Reproductive diseases, Rare diseases, Genetic diseases, Metabolic diseases	5	1	SLC25A17	http://www.malacards.org/card/adrenomyeloneuropathy					0.305271	0.130045	0.0644121	0.0735703	0.081202
0.9	Pulmonary Fibrosis	Respiratory diseases, Genetic diseases	113	1	HPS3	http://www.malacards.org/card/pulmonary_fibrosis					0.304999	0.0783847	0.110715	0.132064	0.0539848
0.96	Alcohol Dependence	Mental diseases, Cancer diseases, Genetic diseases	73	2	GRIK3, RCBTB1	http://www.malacards.org/card/alcohol_dependence					0.304062	0.125121	0.0468711	0.17894	0.0316528
1.12	Motor Neuron Disease	Neuronal diseases	29	1	ALS2	http://www.malacards.org/card/motor_neuron_disease					0.302827	0.108412	0.172309	0.0917567	0.0835804
1.34	Muscular Dystrophy, Limb-Girdle, Type 2f	Neuronal diseases, Muscle diseases, Rare diseases, Genetic diseases, Metabolic diseases	11	1	SGCB	http://www.malacards.org/card/muscular_dystrophy_limb_girdle_type_2f					0.302348	0.0937277	0.138173	0.0332582	0.11459
1.27	Lymphatic System Cancer	Immune diseases, Cancer diseases	15	1	DACH1	http://www.malacards.org/card/lymphatic_system_cancer					0.301046	0.11801	0.0523821	0.160759	0.0529842
1.5	Toxic Oil Syndrome	Rare diseases	5	1	AHR	http://www.malacards.org/card/toxic_oil_syndrome					0.300572	0.0682299	0.0829579	0.14728	0.043583
1.5	Eosinophilic Fasciitis	Neuronal diseases, Bone diseases, Rare diseases	3	1	AHR	http://www.malacards.org/card/eosinophilic_fasciitis					0.300572	0.0682299	0.0829579	0.14728	0.043583
1.5	Eosinophilia-Myalgia Syndrome	Blood diseases, Rare diseases	7	1	AHR	http://www.malacards.org/card/eosinophilia_myalgia_syndrome					0.300572	0.0682299	0.0829579	0.14728	0.043583
1.5	Pompholyx	Skin diseases	5	1	AQP3	http://www.malacards.org/card/pompholyx					0.29972	0.0854203	0.0242474	0.00839217	0.135174
1.31	Situs Inversus	Rare diseases	13	1	CCDC40	http://www.malacards.org/card/situs_inversus					0.295739	0.125985	0.0910876	0.0644711	0.058852
1.5	Giant Cell Reparative Granuloma	Oral diseases, Gastrointestinal diseases, Cancer diseases	6	1	CALCR	http://www.malacards.org/card/giant_cell_reparative_granuloma					0.294014	0.112313	0.04175	0.000228155	0.130836
1.5	Sparganosis	Infectious diseases	6	1	CALCR	http://www.malacards.org/card/sparganosis					0.294014	0.112313	0.04175	0.000228155	0.130836
1.07	Endocrine Gland Cancer	Endocrine diseases, Cancer diseases	38	1	MLH1	http://www.malacards.org/card/endocrine_gland_cancer					0.293577	0.0537246	0.10833	0.15589	0.0224293
1.46	Congenital Heart Block	Cardiovascular diseases, Rare diseases, Genetic diseases	8	1	CACNA1D	http://www.malacards.org/card/congenital_heart_block					0.293574	0.0180548	0.0162053	0.00554854	0.0854299
1.21	Branchiooculofacial Syndrome	Rare diseases, Fetal diseases, Genetic diseases	18	1	DACH1	http://www.malacards.org/card/branchiooculofacial_syndrome					0.29199	0.11446	0.0508063	0.155923	0.0513903
1.31	Proximal Symphalangism	Bone diseases, Rare diseases, Fetal diseases, Genetic diseases	11	1	FGF9	http://www.malacards.org/card/proximal_symphalangism					0.291854	0.107402	0.0907667	0.074131	0.0694613
1.28	Rothmund-Thomson Syndrome	Skin diseases, Eye diseases, Cancer diseases, Rare diseases, Fetal diseases, Genetic diseases	13	1	DDX11	http://www.malacards.org/card/rothmund_thomson_syndrome					0.291225	0.17124	0.00285983	0.141244	0.0713501
1.42	Penis Agenesis	Rare diseases	9	1	AHR	http://www.malacards.org/card/penis_agenesis					0.291199	0.0661022	0.0803709	0.142688	0.0422239
1.42	Peanut Allergy	Immune diseases	9	1	AHR	http://www.malacards.org/card/peanut_allergy					0.291199	0.0661022	0.0803709	0.142688	0.0422239
1.31	Organic Acidemia	Rare diseases, Genetic diseases, Metabolic diseases	13	1	MMAA	http://www.malacards.org/card/organic_acidemia					0.290444	0.0885854	0.0772581	0.113564	0.0461806
1.42	Hydrarthrosis	Bone diseases	9	1	AQP3	http://www.malacards.org/card/hydrarthrosis					0.290374	0.0827565	0.0234912	0.00813047	0.130959
1.29	Sertoli Cell-Only Syndrome	Reproductive diseases, Rare diseases	14	1	FGF9	http://www.malacards.org/card/sertoli_cell_only_syndrome					0.289101	0.106389	0.0899103	0.0734315	0.0688059
1.39	Seborrheic Dermatitis	Skin diseases	10	1	AHR	http://www.malacards.org/card/seborrheic_dermatitis					0.287548	0.0652734	0.0793632	0.140898	0.0416944
1.25	Morbid Obesity	Metabolic diseases	27	1	CCDC40	http://www.malacards.org/card/morbid_obesity			Skeletal Muscle	CCDC40	0.28725	0.122368	0.088473	0.0626205	0.0571627
1.29	Ichthyosis, X-Linked	Skin diseases, Eye diseases, Rare diseases, Genetic diseases	12	1	NLGN4X	http://www.malacards.org/card/ichthyosis_x_linked					0.285643	0.0816938	0.000125683	0.0534152	0.0819795
1.42	Bone Giant Cell Tumor	Bone diseases, Cancer diseases, Rare diseases	9	1	CALCR	http://www.malacards.org/card/bone_giant_cell_tumor					0.284845	0.108811	0.040448	0.00022104	0.126756
1.36	Oligohydramnios	Fetal diseases	11	1	AQP3	http://www.malacards.org/card/oligohydramnios					0.283016	0.0806595	0.022896	0.00792444	0.12764
1.36	Impaired Renal Function Disease	Nephrological diseases	11	1	AQP3	http://www.malacards.org/card/impaired_renal_function_disease					0.283016	0.0806595	0.022896	0.00792444	0.12764
1.28	Pemphigus	Skin diseases, Rare diseases	14	1	ATP2C1	http://www.malacards.org/card/pemphigus					0.281764	0.132711	0.00836838	0.170185	0.0266548
1.23	Ladd Syndrome	Skin diseases, Eye diseases, Bone diseases, Oral diseases, Gastrointestinal diseases, Smell/Taste diseases, Rare diseases, Fetal diseases, Genetic diseases	15	1	FGF9	http://www.malacards.org/card/ladd_syndrome					0.280606	0.103263	0.0872685	0.0712739	0.0667842
1.23	Transcobalamin Ii Deficiency	Immune diseases, Blood diseases, Genetic diseases, Metabolic diseases	16	1	MMAA	http://www.malacards.org/card/transcobalamin_ii_deficiency					0.27925	0.0851713	0.0742805	0.109187	0.0444008
1.21	Moebius Syndrome	Eye diseases, Neuronal diseases, Rare diseases, Fetal diseases, Genetic diseases	17	1	FGF9	http://www.malacards.org/card/moebius_syndrome					0.277695	0.102192	0.0863632	0.0705346	0.0660914
1.5	Central Pontine Myelinolysis	Neuronal diseases, Rare diseases	5	1	FLVCR2	http://www.malacards.org/card/central_pontine_myelinolysis					0.276798	0.0498237	0.13923	0.0719676	0.0525917
1.5	Dissociative Disorder	Mental diseases	7	1	FLVCR2	http://www.malacards.org/card/dissociative_disorder					0.276798	0.0498237	0.13923	0.0719676	0.0525917
1.5	Mondini Dysplasia	Rare diseases, Genetic diseases	1	1	SLC26A4	http://www.malacards.org/card/mondini_dysplasia					0.27671	0.116218	0.0498078	0.141399	0.0334819
1.02	Major Depressive Disorder and Accelerated Response to Antidepressant Drug Treatment	Mental diseases, Genetic diseases	51	1	ARNTL	http://www.malacards.org/card/major_depressive_disorder_and_accelerated_response_to_antidepressant_drug_treatment					0.275675	0.183324	0.0744323	0.172297	0.0904214
1.19	Frasier Syndrome	Endocrine diseases, Reproductive diseases, Nephrological diseases, Cancer diseases, Rare diseases, Fetal diseases, Genetic diseases	20	1	FGF9	http://www.malacards.org/card/frasier_syndrome					0.274744	0.101106	0.0854453	0.0697849	0.065389
1.46	Cystic Lymphangioma	Skin diseases, Immune diseases, Cardiovascular diseases, Cancer diseases, Rare diseases, Fetal diseases	8	1	FLVCR2	http://www.malacards.org/card/cystic_lymphangioma					0.272542	0.0490576	0.137089	0.070861	0.051783
1.46	Dyshormonogenic Goiter	Endocrine diseases	8	1	SLC26A4	http://www.malacards.org/card/dyshormonogenic_goiter					0.272456	0.114431	0.049042	0.139225	0.0329671
1.46	Hodgkin's Lymphoma, Nodular Sclerosis	Immune diseases, Blood diseases, Cancer diseases, Rare diseases	8	1	SLC26A4	http://www.malacards.org/card/hodgkins_lymphoma_nodular_sclerosis					0.272456	0.114431	0.049042	0.139225	0.0329671
1.18	Amino Acid Metabolic Disorder	Metabolic diseases	22	1	MMAA	http://www.malacards.org/card/amino_acid_metabolic_disorder					0.271932	0.0829393	0.0723339	0.106325	0.0432372
1.27	Giant Cell Tumor	Cancer diseases	15	1	CALCR	http://www.malacards.org/card/giant_cell_tumor					0.266222	0.101697	0.0378035	0.000206588	0.118469
1.22	Diabetes Insipidus, Nephrogenic	Nephrological diseases, Rare diseases, Genetic diseases	16	1	AQP3	http://www.malacards.org/card/diabetes_insipidus_nephrogenic					0.264609	0.0754135	0.0214069	0.00740905	0.119339
1.5	B-Cell Lymphoma of Mucosa-Associated Lymphoid Tissue	Immune diseases, Genetic diseases	6	1	BIRC3	http://www.malacards.org/card/b_cell_lymphoma_of_mucosa_associated_lymphoid_tissue					0.263595	0.0300498	0.135488	0.0163693	0.0830325
1.5	Prostate Lymphoma	Immune diseases, Reproductive diseases, Cancer diseases	5	1	BIRC3	http://www.malacards.org/card/prostate_lymphoma					0.263595	0.0300498	0.135488	0.0163693	0.0830325
1.21	Endocrine Organ Benign Neoplasm	Endocrine diseases, Cancer diseases	19	1	CACNA1D	http://www.malacards.org/card/endocrine_organ_benign_neoplasm					0.261853	0.0161039	0.0144543	0.00494901	0.0761991
1.36	Multinodular Goiter	Endocrine diseases, Cancer diseases, Rare diseases, Genetic diseases	11	1	SLC26A4	http://www.malacards.org/card/multinodular_goiter					0.261288	0.109741	0.0470319	0.133518	0.0316159
1.23	Osteoporotic Fracture	Bone diseases	18	1	CALCR	http://www.malacards.org/card/osteoporotic_fracture					0.26092	0.0996713	0.0370506	0.000202474	0.116109
1.5	Nonphotosensitive Trichothiodystrophy	Neuronal diseases, Rare diseases, Genetic diseases	3	1	MPLKIP	http://www.malacards.org/card/nonphotosensitive_trichothiodystrophy					0.259678	0.024228	0.160741	0.0794614	0.0856937
1.34	Achondrogenesis Ib	Bone diseases, Rare diseases, Fetal diseases, Genetic diseases	10	1	SLC26A4	http://www.malacards.org/card/achondrogenesis_ib					0.25896	0.108763	0.0466129	0.132329	0.0313342
1.2	Testicular Cancer	Reproductive diseases, Cancer diseases, Rare diseases	20	1	IGF2BP2	http://www.malacards.org/card/testicular_cancer					0.258069	0.0552268	0.0614204	0.052388	0.0701948
1.46	Developmental Disabilities	Mental diseases	8	1	MPLKIP	http://www.malacards.org/card/developmental_disabilities					0.255685	0.0238554	0.158269	0.0782397	0.0843761
1.29	Diastrophic Dysplasia	Bone diseases, Rare diseases, Fetal diseases, Genetic diseases	12	1	SLC26A4	http://www.malacards.org/card/diastrophic_dysplasia					0.252997	0.106259	0.0455395	0.129282	0.0306127
1.5	Mesomelic Dysplasia Savarirayan Type	Bone diseases, Rare diseases, Fetal diseases	1	1	ID4	http://www.malacards.org/card/mesomelic_dysplasia_savarirayan_type					0.252039	0.0826689	0.0690588	0.14341	0.0627578
1.27	Labyrinthine Disease	Ear diseases	15	1	SLC26A4	http://www.malacards.org/card/labyrinthine_disease					0.250554	0.105233	0.0450997	0.128033	0.030317
1.26	Hypothyroidism	Endocrine diseases, Immune diseases, Rare diseases, Genetic diseases	25	1	SLC26A4	http://www.malacards.org/card/hypothyroidism					0.249319	0.104714	0.0448775	0.127402	0.0301676
1.36	Solitary Osseous Plasmacytoma	Bone diseases, Immune diseases, Blood diseases, Cancer diseases	11	1	BIRC3	http://www.malacards.org/card/solitary_osseous_plasmacytoma					0.248904	0.028375	0.127937	0.0154569	0.0784047
1.25	Ischemic Optic Neuropathy	Eye diseases, Neuronal diseases	16	1	FLVCR2	http://www.malacards.org/card/ischemic_optic_neuropathy					0.248155	0.0446679	0.124822	0.0645203	0.0471495
1.25	Hashimoto Thyroiditis	Immune diseases, Genetic diseases	16	1	SLC26A4	http://www.malacards.org/card/hashimoto_thyroiditis					0.248076	0.104192	0.0446537	0.126767	0.0300172
1.24	Goiter	Endocrine diseases	17	1	SLC26A4	http://www.malacards.org/card/goiter					0.246824	0.103666	0.0444284	0.126127	0.0298657
1.5	Leiomyomatosis and Renal Cell Cancer	Skin diseases, Nephrological diseases, Cancer diseases, Rare diseases, Genetic diseases	5	1	BNIP3	http://www.malacards.org/card/leiomyomatosis_and_renal_cell_cancer					0.241678	0.0268263	0.128814	0.0628363	0.0734702
1.29	Marginal Zone B-Cell Lymphoma	Immune diseases, Blood diseases, Cancer diseases	14	1	BIRC3	http://www.malacards.org/card/marginal_zone_b_cell_lymphoma					0.241006	0.0274747	0.123877	0.0149665	0.0759169
1.5	Odontoma	Rare diseases	3	1	LHX8	http://www.malacards.org/card/odontoma					0.239858	0.0455731	0.114412	0.0885077	0.0885077
1.16	Inner Ear Disease	Ear diseases	24	1	SLC26A4	http://www.malacards.org/card/inner_ear_disease					0.236491	0.0993263	0.0425684	0.120847	0.0286154
1.46	Actinomycosis	Rare diseases, Infectious diseases	8	1	CNTN5	http://www.malacards.org/card/actinomycosis					0.235968	0.0434181	0.0910836	0.0464857	0.0655991
1.31	Hemoglobinopathy	Blood diseases, Rare diseases	13	1	KLF10	http://www.malacards.org/card/hemoglobinopathy					0.235847	0.0466977	0.0254715	0.0636786	0.0568391
1.15	Thyroid Gland Disease	Endocrine diseases	25	1	SLC26A4	http://www.malacards.org/card/thyroid_gland_disease					0.235159	0.0987667	0.0423286	0.120166	0.0284542
1.15	Nonsyndromic Deafness	Neuronal diseases, Ear diseases, Cardiovascular diseases, Rare diseases, Genetic diseases	24	1	SLC26A4	http://www.malacards.org/card/nonsyndromic_deafness					0.235159	0.0987667	0.0423286	0.120166	0.0284542
1.14	Auditory System Disease	Ear diseases	27	1	SLC26A4	http://www.malacards.org/card/auditory_system_disease					0.233817	0.0982032	0.0420871	0.119481	0.0282919
1.36	Candida Glabrata	Rare diseases	11	1	RIF1	http://www.malacards.org/card/candida_glabrata					0.221545	0.0602601	0.0263638	0.0722235	0.0064691
1.26	Image Syndrome	Endocrine diseases, Bone diseases, Rare diseases, Fetal diseases, Genetic diseases	15	1	LHX8	http://www.malacards.org/card/image_syndrome					0.216115	0.0410619	0.103087	0.0797465	0.0797465
1.27	Interleukin-7 Receptor Alpha Deficiency	Immune diseases	15	1	LSM6	http://www.malacards.org/card/interleukin_7_receptor_alpha_deficiency					0.211913	0.0468327	0.0506471	0.062938	0.0114645
1.04	Down Syndrome	Rare diseases, Genetic diseases	81	1	ID4	http://www.malacards.org/card/down_syndrome			Brain	ID4	0.200273	0.0656895	0.0548748	0.113955	0.0498679
0.47	Becker Muscular Dystrophy	Neuronal diseases, Muscle diseases, Rare diseases, Genetic diseases	201	1	LPIN1	http://www.malacards.org/card/becker_muscular_dystrophy			Skeletal Muscle	LPIN1	0.187042	0.0437677	0.0259988	0.0910892	0.0506883
0.8	Rett Syndrome	Neuronal diseases, Mental diseases, Rare diseases, Fetal diseases, Genetic diseases	110	1	ID4	http://www.malacards.org/card/rett_syndrome			Brain	ID4	0.165955	0.0544331	0.0454716	0.0944282	0.0413227
0.49	Agammaglobulinemia	Immune diseases, Blood diseases, Cancer diseases, Rare diseases, Genetic diseases	149	1	MXI1	http://www.malacards.org/card/agammaglobulinemia			Blood	MXI1	0.163269	0.0507768	0.00662874	0.0171433	0.0956759
0	Diabetes Mellitus, Noninsulin-Dependent 1	Endocrine diseases, Genetic diseases, Metabolic diseases	2	1	CAPN10	http://www.malacards.org/card/diabetes_mellitus_noninsulin_dependent_1					0	0	0	0	0
0	Hemangioma, Capillary Infantile	Skin diseases, Eye diseases, Cardiovascular diseases, Cancer diseases, Rare diseases, Fetal diseases, Genetic diseases	5	1	ATR	http://www.malacards.org/card/hemangioma_capillary_infantile					0	0	0	0	0
0	Bone Mineral Density, Low	Bone diseases, Genetic diseases	3	1	LGR4	http://www.malacards.org/card/bone_mineral_density_low					0	0	0	0	0
0	Bone Mineral Density Qtl 12, Osteoporosis	Bone diseases, Genetic diseases	2	1	FBXO33	http://www.malacards.org/card/bone_mineral_density_qtl_12_osteoporosis					0	0	0	0	0
0	Cystic Fibrosis	Endocrine diseases, Gastrointestinal diseases, Reproductive diseases, Respiratory diseases, Rare diseases, Genetic diseases, Metabolic diseases	107	1	IFT122	http://www.malacards.org/card/cystic_fibrosis					0	0	0	0	0
0	Brca1 Hereditary Breast and Ovarian Cancer Syndrome	Cancer diseases, Rare diseases, Genetic diseases	6	1	BRCA2	http://www.malacards.org/card/brca1_hereditary_breast_and_ovarian_cancer_syndrome					0	0	0	0	0
0	Polymicrogyria, Bilateral Temporooccipital	Genetic diseases	2	1	MCM3AP	http://www.malacards.org/card/polymicrogyria_bilateral_temporooccipital					0	0	0	0	0
0	Asperger Syndrome Susceptibility, X-Linked 2	Genetic diseases	1	1	NLGN4X	http://www.malacards.org/card/asperger_syndrome_susceptibility_x_linked_2					0	0	0	0	0
0	Dystonia 23	Neuronal diseases, Ear diseases, Muscle diseases, Rare diseases, Genetic diseases	2	1	ANO3	http://www.malacards.org/card/dystonia_23					0	0	0	0	0
0	Breast-Ovarian Cancer, Familial, 1	Reproductive diseases, Cancer diseases, Rare diseases, Genetic diseases	3	1	BRCA2	http://www.malacards.org/card/breast_ovarian_cancer_familial_1					0	0	0	0	0
0	Autism Susceptibility 17	Genetic diseases	1	1	SHANK2	http://www.malacards.org/card/autism_susceptibility_17					0	0	0	0	0
0	Autism Susceptibility, X-Linked 2	Neuronal diseases, Mental diseases, Genetic diseases	1	1	NLGN4X	http://www.malacards.org/card/autism_susceptibility_x_linked_2					0	0	0	0	0

## Sheet: black_GO - Biological Process
Score	Name	# Genes	# Matched Genes	Matched Genes (Symbols)	Evidence URL	module.significance	ts.motifs	ts.learning	ts.variability.induction	ts.identity
9.28	Negative Regulation of Glucocorticoid Mediated Signaling Pathway	2	2	NR3C1, CREBRF	http://amigo.geneontology.org/amigo/term/GO:1900170	0.808915	0.501527	0.102489	0.370887	0.151671
8.14	Positive Regulation of Intracellular Transport	3	2	CAPN10, CREBRF	http://amigo.geneontology.org/amigo/term/GO:0032388	0.806632	0.48035	0.16536	0.361775	0.112041
15.73	Chromatin Modification	106	13	HAT1, MSL3, ING1, ING3, NR3C1, RCBTB1, TAF5, ARID2, ASF1A, BMI1, CBX7, CHD2, CTCF	http://amigo.geneontology.org/amigo/term/GO:0016568	0.7639	0.427137	0.120925	0.428842	0.12757
14.91	De Novo Centriole Assembly	6	4	PLK4, CCDC18, CEP152, CEP63	http://amigo.geneontology.org/amigo/term/GO:0098535	0.76266	0.361501	0.134419	0.468273	0.104713
11.11	Centriole Replication	12	4	PLK4, CCDC18, CEP152, CEP63	http://amigo.geneontology.org/amigo/term/GO:0007099	0.76234	0.361349	0.134362	0.468077	0.104669
8.96	Microtubule Nucleation	18	4	RANBP9, TUBGCP4, TUBGCP6, CLASP2	http://amigo.geneontology.org/amigo/term/GO:0007020	0.75651	0.343266	0.192891	0.368799	0.177288
15.39	Centrosome Duplication	19	6	PKD2, TUBGCP4, TUBGCP6, BRCA2, CEP192, CEP152	http://amigo.geneontology.org/amigo/term/GO:0051298	0.754762	0.404427	0.192764	0.362412	0.221938
9.18	Positive Regulation of Smooth Muscle Cell Apoptotic Process	8	3	IL12B, PDCD4, APOPT1	http://amigo.geneontology.org/amigo/term/GO:0034393	0.752558	0.43824	0.161098	0.409893	0.0993126
15.58	Negative Regulation of Transcription From RNA Polymerase II Promoter	722	42	MITF, EPC1, PKIA, HCFC2, SNW1, PPID, ID4, SOX2, MXI1, IRF2, AHR, PROX1, FGF9, KLF5, KLF10, MEF2A, NCOA2, NR1H3, FOXO3, NSD1, GABPA, RBBP7, RYBP, SKIL, TAGLN3, TBL1XR1, WWC1, ZC3H8, ZHX1, ZBTB42, ZNF148, ARX, ATF7IP, BEND6, BHLHE41, BMI1, CBX7, CTCF, CTNNB1, CREBRF, DACH1, DLL4	http://amigo.geneontology.org/amigo/term/GO:0000122	0.690307	0.33973	0.113999	0.369826	0.124794
9.52	Regulation of GTPase Activity	72	8	EPHA4, FGD3, FGD4, ALS2, RALBP1, SIPA1L1, TBC1D15, VAV2	http://amigo.geneontology.org/amigo/term/GO:0043087	0.684686	0.285754	0.136723	0.364595	0.120898
10.89	Positive Regulation of GTPase Activity	484	28	RGS12, RGS17, MON2, MADD, AGFG1, RPGR, FGD3, FGD4, MCF2, ALS2, RALBP1, RAPGEF2, RAPGEF4, RASGEF1C, STARD13, SIPA1L1, TBC1D4, TBC1D15, TBC1D2B, VAV2, ARFGEF1, ARFGEF3, ARHGEF33, BCAR3, CDC42EP3, DENND5B, DOCK4, DOCK7	http://amigo.geneontology.org/amigo/term/GO:0043547	0.681844	0.279162	0.116598	0.355777	0.141139
14.34	Negative Regulation of Transcription, DNA-templated	532	33	EPC1, LGR4, SNW1, ID4, AHR, PROX1, KAT6B, KLF10, NCOA2, NONO, NR1H3, RBBP7, GAS6, PDCD4, RUNX1T1, SETDB2, SIX3, TBL1XR1, TRIM66, ZC3H8, XRCC6, ZHX1, ZNF148, ARNTL, ATF7IP, BHLHE41, BTAF1, BRD7, CDKN1B, CIPC, CTCF, CTNNB1, DACH1	http://amigo.geneontology.org/amigo/term/GO:0045892	0.670769	0.329063	0.115847	0.361992	0.129175
8.54	Cellular Response to DNA Damage Stimulus	224	15	DYRK2, MLH1, MLH3, RIF1, RNF169, RNF8, ALKBH8, RAD52, SESN1, SUSD6, ATR, ATAD5, BCL2, BRCA2, CHD2	http://amigo.geneontology.org/amigo/term/GO:0006974	0.667362	0.288452	0.125073	0.351166	0.0939455
8.14	Ventricular Cardiac Myofibril Assembly	3	2	PROX1, MEF2A	http://amigo.geneontology.org/amigo/term/GO:0055005	0.658115	0.335639	0.0758477	0.214874	0.175388
8.67	Protein Import Into Nucleus	46	6	PPP3CA, ING1, FGF9, MCM3AP, KPNA4, SIX3	http://amigo.geneontology.org/amigo/term/GO:0006606	0.657393	0.327382	0.0697932	0.318069	0.0963958
9.88	Osteoclast Differentiation	26	5	MITF, GLO1, IREB2, CALCR, CTNNB1	http://amigo.geneontology.org/amigo/term/GO:0030316	0.653509	0.318128	0.143349	0.32947	0.141289
11.11	Lens Morphogenesis in Camera-type Eye	12	4	PROX1, SHROOM2, BCAR3, CTNNB1	http://amigo.geneontology.org/amigo/term/GO:0002089	0.638743	0.295259	0.0272689	0.368874	0.114319
8.29	Cell Division	322	19	MIS18A, MPLKIP, LRRCC1, RNF8, KIF14, FIGN, NEK3, ANAPC4, ANKLE2, PARD6G, REEP3, ANXA11, SETDB2, SKA3, CCNE2, CDC23, CEP63, CLASP2, CKAP5	http://amigo.geneontology.org/amigo/term/GO:0051301	0.634521	0.237688	0.168232	0.322136	0.121854
8.54	Cell-cell Junction Organization	63	7	NLGN4X, PARD6G, TGFB2, CDH18, CDH8, CDH9, CLDN12	http://amigo.geneontology.org/amigo/term/GO:0045216	0.573926	0.195381	0.118699	0.224749	0.101798
8.14	Aorta Smooth Muscle Tissue Morphogenesis	3	2	PROX1, MYLK	http://amigo.geneontology.org/amigo/term/GO:0060414	0.55636	0.206131	0.0273451	0.245633	0.169968

## Sheet: black_GO - Molecular Function
Score	Name	# Genes	# Matched Genes	Matched Genes (Symbols)	Evidence URL	module.significance	ts.motifs	ts.learning	ts.variability.induction	ts.identity
10.39	Nuclear Hormone Receptor Binding	24	5	SMARCD3, SNW1, NCOA2, TACC2, CTNNB1	http://amigo.geneontology.org/amigo/term/GO:0035257	0.762645	0.44813	0.129211	0.478484	0.107121
10.59	SNARE Binding	49	7	GABARAPL2, STX19, STX7, UVRAG, VTI1A, CAPN10, CPLX4	http://amigo.geneontology.org/amigo/term/GO:0000149	0.762399	0.360397	0.222403	0.398517	0.130566
10.83	Binding	343	22	MON2, RIF1, EIF5, KPNA4, PDCD4, PIK3C2A, SAAL1, RTTN, SERAC1, ULK4, USP24, XPO4, ARFGEF1, ARFGEF3, ZYG11A, ARID2, ATR, BTAF1, CLASP2, CKAP5, CTNNB1, DNAJC13	http://amigo.geneontology.org/amigo/term/GO:0005488	0.759132	0.361623	0.145752	0.425459	0.141464
13.13	Histone Acetyltransferase Activity	49	8	EPC1, HAT1, ING3, KAT6B, MGEA5, NCOA2, TAF5, BRCA2	http://amigo.geneontology.org/amigo/term/GO:0004402	0.753735	0.373381	0.163344	0.434434	0.183836
6.58	Chromatin Binding	414	21	MITF, MLH3, SMARCD3, HMGB3, HMGXB4, RNF8, ADNP, MBD5, MEF2A, NCOA2, NONO, NSD1, GABPA, SKIL, TRIM66, ARX, ASF1A, BEND6, CBX7, CTCF, CTNNB1	http://amigo.geneontology.org/amigo/term/GO:0003682	0.719607	0.366897	0.127337	0.415727	0.106439
6.94	Channel Activity	14	3	PKD2, PANX2, BCL2	http://amigo.geneontology.org/amigo/term/GO:0015267	0.702914	0.200659	0.131534	0.448928	0.0674329
8.14	Phosphatidate Cytidylyltransferase Activity	3	2	TAMM41, CDS1	http://amigo.geneontology.org/amigo/term/GO:0004605	0.702071	0.263979	0.275914	0.307507	0.22712
7.34	AMPA Glutamate Receptor Activity	4	2	GRIA1, GRIA4	http://amigo.geneontology.org/amigo/term/GO:0004971	0.690767	0.3067	0.0679024	0.425858	0.0155077
24.05	Protein Binding	11034	382	SLC4A1AP, DYRK2, MIS18A, MITF, SLC9A7, LACE1, RGS12, ABCD2, MLH1, RGS17, MLH3, SLIT2, ABCG1, MLLT10, SLX4IP, LARP1B, LCA5, SMARCD3, ENTPD5, MON2, GDAP1, EPB41L4B, EPC1, LDLRAD3, RIF1, MPLKIP, EPHA4, RIOK3, MPPE1, ACSS1, LGR4, EPS8, LHX8, PKD2, PKIA, EIF2AK3, LIN54, LONRF1, MRPL53, ERGIC2, PLCL2, GRIK3, GRIA1, MRPS31, PLAU, GRIA4, GRM1, PLEKHF1, PLEKHF2, GSTO2, ACVR2A, PLK4, GUCY1A3, GTPBP10, HAT1…	http://amigo.geneontology.org/amigo/term/GO:0005515	0.685847	0.312024	0.144039	0.353185	0.132059
6.72	MutSalpha Complex Binding	5	2	MLH1, ATR	http://amigo.geneontology.org/amigo/term/GO:0032407	0.682227	0.229228	0.172603	0.424004	0.0714291
7.54	Protein Dimerization Activity	196	13	MITF, ABCG1, ID4, PPP3CA, MXI1, AHR, MEF2A, NCOA2, NR3C1, TAF5, ARNTL, ATR, BHLHE41	http://amigo.geneontology.org/amigo/term/GO:0046983	0.675389	0.336032	0.111112	0.334578	0.150295
8.59	Transcription Corepressor Activity	201	14	SNW1, ID4, MXI1, PROX1, NSD1, RYBP, RUNX1T1, SKIL, TBL1XR1, ZHX1, ATF7IP, BHLHE41, BRD7, CTCF	http://amigo.geneontology.org/amigo/term/GO:0003714	0.675184	0.319651	0.103511	0.344585	0.137669
6.45	Transcription Regulatory Region DNA Binding	216	13	SOX2, AHR, PROX1, NR1H3, GABPA, TAF5, TBL1XR1, TCF20, TBP, XRCC6, BRD7, CTCF, CTNNB1	http://amigo.geneontology.org/amigo/term/GO:0044212	0.671555	0.328855	0.103795	0.368942	0.113337
7.1	Hsp90 Protein Binding	26	4	EIF2AK3, PPID, AHR, ARNTL	http://amigo.geneontology.org/amigo/term/GO:0051879	0.669106	0.361652	0.113798	0.41886	0.0860136
6.72	Voltage-gated Cation Channel Activity	5	2	PKD2, HVCN1	http://amigo.geneontology.org/amigo/term/GO:0022843	0.64121	0.264499	0.16331	0.25424	0.116476
7.23	Glutamate Receptor Activity	13	3	GRIK3, GRIA1, GRM1	http://amigo.geneontology.org/amigo/term/GO:0008066	0.632684	0.239576	0.0923508	0.289558	0.0538836
15.45	Guanyl-nucleotide Exchange Factor Activity	108	13	RPGR, FGD3, FGD4, MCF2, ALS2, RAPGEF2, RAPGEF4, RASGEF1C, VAV2, ARFGEF1, BCAR3, DOCK4, DOCK7	http://amigo.geneontology.org/amigo/term/GO:0005085	0.63153	0.204858	0.115453	0.288803	0.15557
6.96	4 Iron, 4 Sulfur Cluster Binding	42	5	LIAS, ETFDH, PRIM2, IREB2, DDX11	http://amigo.geneontology.org/amigo/term/GO:0051539	0.597778	0.288846	0.152316	0.311562	0.131033
6.82	Rac GTPase Binding	43	5	EPS8, RALBP1, CYFIP1, DOCK4, DOCK7	http://amigo.geneontology.org/amigo/term/GO:0048365	0.55789	0.113453	0.0738312	0.331052	0.0808606
7.29	Cysteine-type Endopeptidase Inhibitor Activity Involved in Apoptotic Process	25	4	PRDX3, GAS6, TNFAIP8, BIRC3	http://amigo.geneontology.org/amigo/term/GO:0043027	0.45604	0.115492	0.156718	0.129413	0.0922342

## Sheet: black_Pathways
Score	SuperPath Name	# SuperPath Total Genes	# SuperPath Matched Genes	Matched Genes (Symbols)	Evidence URL	module.significance	ts.motifs	ts.learning	ts.variability.induction	ts.identity
8.97	Cell Cycle, Mitotic	634	32	MIS18A, MLH1, MLH3, LIN54, LPIN1, PLK4, RNF8, PRIM2, PSMA4, NUP107, ANAPC4, ORC3, ANKLE2, RBBP7, SGO2, TUBGCP4, TUBGCP6, VRK2, ATR, BRCA2, CCNE2, CDC23, CEP192, CEP152, CENPU, CEP63, CDKN1B, CEP70, CLASP2, CKAP5, CLSPN, DBF4	http://pathcards.genecards.org/card/cell_cycle_mitotic	0.670333	0.269662	0.176966	0.335124	0.138325
8.39	FoxO Signaling Pathway	140	11	GRM1, PLK4, IRS1, IRS4, FOXO3, GABARAPL2, SGK3, TGFB2, BNIP3, CAT, CDKN1B	http://pathcards.genecards.org/card/foxo_signaling_pathway	0.691226	0.287613	0.192186	0.308475	0.156424
8.27	Glucocorticoid Pathway (Peripheral Tissue), Pharmacodynamics	10	3	NR3C1, ST13, TBP	http://pathcards.genecards.org/card/glucocorticoid_pathway_(peripheral_tissue)_pharmacodynamics	0.747682	0.346925	0.256056	0.316519	0.200379
8.17	Organelle Biogenesis and Maintenance	349	20	SMARCD3, PKD2, MRPL53, MRPS25, MRPS31, MRPS5, PLK4, IFT122, AHI1, NCOA2, GABPA, TBL1XR1, WDR19, WDR60, C2CD3, CEP192, CEP152, CEP63, CEP70, CKAP5	http://pathcards.genecards.org/card/organelle_biogenesis_and_maintenance	0.738724	0.382733	0.157966	0.368143	0.151188
8.17	P53 Pathway (RnD)	143	11	MLH1, LPIN1, FOXO3, RCHY1, RRM2B, SESN1, UVRAG, ATR, BCL2, CCNE2, DDIT4	http://pathcards.genecards.org/card/p53_pathway_(rnd)	0.681701	0.264153	0.149602	0.391235	0.116534
7.73	Adipogenesis	149	11	LPIN1, GTF3A, IRS1, IRS4, AHR, KLF5, MEF2A, NCOA2, NR1H3, NR3C1, CTNNB1	http://pathcards.genecards.org/card/adipogenesis	0.711164	0.329786	0.135837	0.379179	0.145213
7.47	Senescence and Autophagy	111	9	PLAU, ING1, ING3, GABARAPL2, UVRAG, ATG5, BCL2, BMI1, CDKN1B	http://pathcards.genecards.org/card/senescence_and_autophagy	0.712728	0.33541	0.166572	0.358423	0.130809
7.01	TNF Signaling (REACTOME)	77	7	ETFDH, MADD, TANK, TAB2, TNIK, USP4, BIRC3	http://pathcards.genecards.org/card/tnf_signaling_(reactome)	0.687555	0.35085	0.151596	0.305481	0.140232
6.73	Transcriptional Activation of Mitochondrial Biogenesis	80	7	SMARCD3, PPP3CA, MEF2A, NCOA2, FOXO3, GABPA, TBL1XR1	http://pathcards.genecards.org/card/transcriptional_activation_of_mitochondrial_biogenesis	0.765156	0.4028	0.0941973	0.406735	0.168804
6.23	Amyotrophic Lateral Sclerosis (ALS)	66	6	GRIA1, GRIA4, PPP3CA, ALS2, BCL2, CAT	http://pathcards.genecards.org/card/amyotrophic_lateral_sclerosis_(als)	0.68685	0.27055	0.166344	0.342395	0.122877
6.19	Circadian Rhythm Pathway	17	3	NONO, ARNTL, ATR	http://pathcards.genecards.org/card/circadian_rhythm_pathway	0.671297	0.390918	0.142315	0.455587	0.135826
6.08	Ceramide Signaling Pathway	49	5	ETFDH, MADD, TANK, BCL2, BIRC3	http://pathcards.genecards.org/card/ceramide_signaling_pathway	0.647313	0.237745	0.184122	0.262045	0.184678
6.04	BMAL1-CLOCK,NPAS2 Activates Circadian Gene Expression	88	7	SMARCD3, FBXL3, NCOA2, NR3C1, TBL1XR1, ARNTL, BHLHE41	http://pathcards.genecards.org/card/bmal1-clocknpas2_activates_circadian_gene_expression	0.722874	0.437235	0.123731	0.354415	0.159889
5.9	RANK Signaling in Osteoclasts	111	8	MITF, PPP3CA, TANK, TAB2, TRAF5, BCL2, BIRC3, CALCR	http://pathcards.genecards.org/card/rank_signaling_in_osteoclasts	0.633481	0.258255	0.15065	0.266923	0.160635
5.88	Peroxisome	90	7	ABCD2, FAR2, PEX1, PECR, PEX26, SLC25A17, CAT	http://pathcards.genecards.org/card/peroxisome	0.64013	0.286138	0.167339	0.286138	0.176036
5.81	Hypothetical Network For Drug Addiction	34	4	GRIA1, GRIA4, GRM1, KRIT1	http://pathcards.genecards.org/card/hypothetical_network_for_drug_addiction	0.661176	0.270421	0.0713244	0.336539	0.0680846
5.81	Regulation of CDC42 Activity	34	4	MCF2, RALBP1, VAV2, BCAR3	http://pathcards.genecards.org/card/regulation_of_cdc42_activity	0.55019	0.110561	0.080823	0.315397	0.120217
5.57	Regulation of PLK1 Activity at G2/M Transition	210	12	LIN54, PLK4, AHI1, PSMA4, TUBGCP4, TUBGCP6, C2CD3, CEP192, CEP152, CEP63, CEP70, CKAP5	http://pathcards.genecards.org/card/regulation_of_plk1_activity_at_g2m_transition	0.71534	0.332514	0.172916	0.370964	0.15322
5.3	IL-2 Gene Expression in Activated and Quiescent T-Cells	38	4	ORC3, TGFB2, CCNE2, CDKN1B	http://pathcards.genecards.org/card/il-2_gene_expression_in_activated_and_quiescent_t-cells	0.662156	0.327602	0.225067	0.252778	0.173485
5.23	NF-kappa B Signaling Pathway	99	7	PLAU, ORC3, TANK, TAB2, TRAF5, BCL2, BIRC3	http://pathcards.genecards.org/card/nf-kappa_b_signaling_pathway	0.600522	0.210817	0.206923	0.246651	0.134354

## Sheet: blue_Diseases
Score	Name	Disease categories	# Total Genes	# Matched Genes	Matched Genes (Symbols)	Evidence URL	Genetic Associations	Matched Genes for Genetic Associations	Diferentially Expressed Genes in Tissue Samples	Genes Matched to Differentially Expressed Genes	module.significance	ts.motifs	ts.learning	ts.variability.induction	ts.identity
2.83	Usher Syndrome, Type 2d	Eye diseases, Ear diseases, Fetal diseases, Genetic diseases, Rare diseases	1	1	DFNB31	http://www.malacards.org/card/usher_syndrome_type_2d_2	Pathogenic, Genetic Tests, Molecular basis known	DFNB31			NA	NA	NA	NA	NA
2.83	Deafness, Autosomal Recessive 31	Neuronal diseases, Ear diseases, Cardiovascular diseases, Genetic diseases, Rare diseases	1	1	DFNB31	http://www.malacards.org/card/deafness_autosomal_recessive_31	Pathogenic, Molecular basis known	DFNB31			NA	NA	NA	NA	NA
2.5	Usher Syndrome Type Ii	Eye diseases, Ear diseases, Fetal diseases, Genetic diseases, Rare diseases	8	1	DFNB31	http://www.malacards.org/card/usher_syndrome_type_ii	Causative germline mutation	DFNB31			NA	NA	NA	NA	NA
2.33	Dfnb31 Nonsyndromic Hearing Loss and Deafness	Ear diseases, Genetic diseases	1	1	DFNB31	http://www.malacards.org/card/dfnb31_nonsyndromic_hearing_loss_and_deafness	Genetic Tests	DFNB31			NA	NA	NA	NA	NA
1.69	Autosomal Recessive Non-Syndromic Sensorineural Deafness Type Dfnb	Neuronal diseases, Ear diseases, Rare diseases	62	1	DFNB31	http://www.malacards.org/card/autosomal_recessive_non_syndromic_sensorineural_deafness_type_dfnb	Causative germline mutation	DFNB31			NA	NA	NA	NA	NA
1.5	Graft-Versus-Host Disease, Protection Against	Bone diseases, Blood diseases, Immune diseases, Genetic diseases, Rare diseases	7	1	HMHA1	http://www.malacards.org/card/graft_versus_host_disease_protection_against					NA	NA	NA	NA	NA
1.5	Usher Syndrome Type 1j	Eye diseases, Ear diseases, Fetal diseases, Genetic diseases, Rare diseases	3	1	DFNB31	http://www.malacards.org/card/usher_syndrome_type_1j					NA	NA	NA	NA	NA
1.46	Deafness, Autosomal Recessive	Neuronal diseases, Ear diseases, Cardiovascular diseases, Genetic diseases, Rare diseases	11	1	DFNB31	http://www.malacards.org/card/deafness_autosomal_recessive					NA	NA	NA	NA	NA
1.42	Deafness and Hereditary Hearing Loss	Ear diseases, Genetic diseases	9	1	DFNB31	http://www.malacards.org/card/deafness_and_hereditary_hearing_loss					NA	NA	NA	NA	NA
1.42	Usher Syndrome	Eye diseases, Ear diseases, Fetal diseases, Genetic diseases, Rare diseases	13	1	DFNB31	http://www.malacards.org/card/usher_syndrome					NA	NA	NA	NA	NA
1.36	Acute Graft Versus Host Disease	Blood diseases, Rare diseases	11	1	HMHA1	http://www.malacards.org/card/acute_graft_versus_host_disease					NA	NA	NA	NA	NA
1.29	Hematopoietic Stem Cell Transplantation	Blood diseases, Rare diseases	14	1	HMHA1	http://www.malacards.org/card/hematopoietic_stem_cell_transplantation					NA	NA	NA	NA	NA
1.22	Thyroid Cancer	Endocrine diseases, Genetic diseases, Cancer diseases	32	1	C8orf4	http://www.malacards.org/card/thyroid_cancer					NA	NA	NA	NA	NA
1.16	Sensorineural Hearing Loss	Ear diseases	24	1	DFNB31	http://www.malacards.org/card/sensorineural_hearing_loss					NA	NA	NA	NA	NA
1.15	Nonsyndromic Deafness	Neuronal diseases, Ear diseases, Cardiovascular diseases, Genetic diseases, Rare diseases	24	1	DFNB31	http://www.malacards.org/card/nonsyndromic_deafness					NA	NA	NA	NA	NA
6.65	Diabetes Mellitus, Noninsulin-Dependent	Endocrine diseases, Genetic diseases, Metabolic diseases	226	8	ANPEP, CTGF, IRS2, LMNA, MTNR1B, PPARD, RRAD, SLC2A3	http://www.malacards.org/card/diabetes_mellitus_noninsulin_dependent			Pancreas	ANPEP, CTGF	0.772898	0.483255	0.135528	0.169221	0.229358
4.53	Emphysema Due to Aat Deficiency	Blood diseases, Respiratory diseases, Liver diseases, Genetic diseases	45	4	ACTB, PFKFB3, TAC1, TRIB1	http://www.malacards.org/card/emphysema_due_to_aat_deficiency			Lung	ACTB, PFKFB3, TAC1, TRIB1	0.758594	0.515275	0.0973086	0.25868	0.124011
[truncated: 1,764 more rows]

## Sheet: blue_GO - Biological Process
Score	Name	# Genes	# Matched Genes	Matched Genes (Symbols)	Evidence URL	module.significance	ts.motifs	ts.learning	ts.variability.induction	ts.identity
[truncated: 20 more rows]

## Sheet: blue_GO - Molecular Function
Score	Name	# Genes	# Matched Genes	Matched Genes (Symbols)	Evidence URL	module.significance	ts.motifs	ts.learning	ts.variability.induction	ts.identity
[truncated: 20 more rows]

[truncated: 76 more sheets: blue_Pathways, brown_Diseases, brown_GO - Biological Process, brown_GO - Molecular Function, brown_Pathways, cyan_Diseases, cyan_GO - Biological Process, cyan_GO - Molecular Function, cyan_Pathways, darkgreen_Diseases, darkgreen_GO - Biological Proce, darkgreen_GO - Molecular Functi, darkgreen_Pathways, darkgrey_Diseases, darkgrey_GO - Biological Proces, darkgrey_GO - Molecular Functio, darkgrey_Pathways, darkred_Diseases, darkred_GO - Biological Process, darkred_GO - Molecular Function …]
