# Supplementary material for: FoxP2 isoforms delineate spatiotemporal transcriptional networks for vocal learning in the zebra finch
Source: eLife. 2018 Jan 23;7:e30649. doi: 10.7554/eLife.30649 (PMC5826274; doi:10.7554/eLife.30649)
Supplement: Supplementary file 3. — Module preservation statistics with Z scores and Bonferroni-corrected log10 p-values are presented in columns C-AL. Column C is the basis for the scatter plot presented as Figure 4B. [file elife-30649-supp3.xlsx]

## Sheet: TableS4.csv
module	moduleSize	medianRank.pres	Zsummary.pres	log.p.Bonfsummary.pres	medianRankDensity.pres	Zdensity.pres	log.p.Bonfdensity.pres	medianRankConnectivity.pres	Zconnectivity.pres	log.p.Bonfconnectivity.pres	propVarExplained.pres	Z.propVarExplained.pres	log.p.Bonf.propVarExplained.pres	meanSignAwareKME.pres	Z.meanSignAwareKME.pres	log.p.Bonf.meanSignAwareKME.pres	meanSignAwareCorDat.pres	Z.meanSignAwareCorDat.pres	log.p.Bonf.meanSignAwareCorDat.pres	meanAdj.pres	Z.meanAdj.pres	log.p.Bonf.meanAdj.pres	cor.kIM	Z.cor.kIM	log.p.Bonf.cor.kIM	cor.kME	Z.cor.kME	log.p.Bonf.cor.kME	cor.kMEall	Z.cor.kMEall	log.p.Bonf.cor.kMEall	cor.cor	Z.cor.cor	log.p.Bonf.cor.cor	cor.MAR	Z.cor.MAR	log.p.Bonf.cor.MAR
black	280	11	4.54907	-6.17745	10	7.12429	-11.994	17	1.97386	-0.360929	0.431981	0.113789	0	0.501169	9.25509	-18.7152	0.235123	19.1514	-80.0719	0.034275	4.99349	-5.27271	0.12537	1.97386	-0.360929	0.0919601	1.06325	0	0.606049	83.74	-1523.79	0.0951237	6.64122	-9.55287	0.162277	2.62617	-1.10949
blue	241	11	6.79678	-10.4646	14.5	5.49119	-6.61505	9	8.10236	-14.3142	0.423274	-0.619192	0	0.40959	6.39012	-8.8263	0.167279	11.516	-29.0061	0.0328251	4.59225	-4.4038	0.273847	4.14176	-3.50839	0.317219	8.10236	-14.3142	0.55034	79.7014	-1380.43	0.159641	14.3952	-45.3019	0.212593	3.21888	-1.9362
brown	350	5	10.1365	-23.6833	5	12.3721	-33.763	5	7.90094	-13.6036	0.491244	4.75485	-4.74779	0.633948	13.5222	-39.9827	0.342452	31.5187	-216.364	0.0457947	11.222	-27.5434	0.337552	6.1538	-8.16696	0.339391	7.90094	-13.6036	0.796409	97.5314	-2066.72	0.244037	21.6371	-102.141	0.354326	6.5283	-9.2228
cyan	135	17	-0.087913	0	17.5	-0.736855	0	16	0.561029	0	0.379886	-2.51122	0	0.072516	-1.23033	0	0.062926	1.95467	-0.341418	0.0219344	-0.243379	0	0.0228484	0.362202	0	0.103256	0.561029	0	0.182982	26.6541	-154.84	0.143476	7.43219	-12.0171	0.054453	0.637403	0
darkgreen	166	8	5.36566	-7.69365	7	6.25747	-11.227	10	4.47385	-4.16026	0.436043	0.277386	0	0.572723	9.87796	-21.3308	0.275228	21.028	-96.4853	0.029987	2.63697	-1.12329	0.177685	2.37202	-0.797997	0.275264	4.47385	-4.16026	0.739233	94.1236	-1924.88	0.198515	13.4006	-39.2675	0.127344	1.81123	-0.200006
darkgrey	111	2	11.8722	-43.7182	1.5	17.2187	-78.221	3	6.5257	-9.21526	0.608633	7.75786	-13.1094	0.718281	9.33134	-19.0265	0.494884	25.1061	-137.416	0.122765	25.4643	-141.355	0.57196	6.36723	-8.76138	0.446337	6.5257	-9.21526	0.675321	96.3708	-2017.85	0.332197	13.5623	-40.2195	0.57598	6.36224	-8.74728
darkred	190	14	3.10577	-5.17187	16.5	-0.693048	0	7	6.90458	-10.3437	0.397465	-1.97433	0	0.0840178	-1.21489	0	0.0550297	1.97837	-0.365539	0.0224915	-0.171202	0	0.492868	6.90458	-10.3437	0.12748	1.67789	-0.075553	0.0604184	7.00891	-10.6652	0.217675	14.2276	-44.2552	0.436389	5.95453	-7.62941
green	604	2	29.1841	-233.275	1.5	39.0882	-385.403	2	19.28	-81.1476	0.597449	18.4092	-74.0008	0.728598	23.4759	-120.189	0.502044	67.0201	-976.329	0.107272	54.7005	-650.618	0.571491	12.7357	-35.4722	0.499168	19.28	-81.1476	0.785051	94.6343	-1945.81	0.368636	42.5886	-394.632	0.571451	12.4856	-34.0941
grey60	212	11	4.86176	-5.80177	12	5.55918	-8.0523	8	4.16434	-3.55124	0.397048	-2.20982	0	0.492227	8.17301	-14.5675	0.220184	16.3065	-58.0977	0.0305083	2.94535	-1.5371	0.275626	4.16434	-3.55124	0.185492	3.75211	-2.80184	0.537242	77.7606	-1314.06	0.208738	14.4721	-45.7862	0.338597	4.87712	-5.01376
magenta	221	8	4.96733	-8.17971	7	8.23154	-16.2608	14	1.70311	-0.0985846	0.467574	2.24204	-0.648536	0.572111	10.8626	-25.8058	0.263559	21.5694	-101.504	0.0381801	5.6005	-6.71589	0.135994	1.70311	-0.0985846	0.117666	1.48594	0	0.675206	85.973	-1606.09	0.139196	9.58797	-20.0923	0.102631	1.31063	0
midnightblue	233	10	6.00379	-9.80217	6.5	8.27826	-16.8419	13	3.72932	-2.76246	0.427559	-0.0806603	0	0.600557	11.252	-27.6911	0.301985	22.9888	-115.265	0.0354487	5.30448	-5.99271	0.0891679	1.28701	0	0.201536	3.72932	-2.76246	0.74008	98.0933	-2090.59	0.151686	10.5317	-24.2554	0.115026	1.65734	-0.0569742
pink	353	3	17.1726	-70.1305	3	20.223	-96.6585	4	14.1221	-43.6025	0.526117	7.87095	-13.4993	0.656012	14.3777	-45.1917	0.405207	38.1762	-317.2	0.071428	26.0684	-148.125	0.461442	9.58028	-20.06	0.440653	14.1221	-43.6025	0.731608	95.8766	-1997.21	0.325068	26.296	-150.718	0.453967	9.69045	-20.5258
purple	398	5	12.7864	-39.2906	4	16.6183	-61.0685	9	8.95452	-17.5127	0.474508	4.36453	-3.94061	0.636371	18.4595	-74.4053	0.357201	44.5247	-431.277	0.0466788	14.777	-47.7318	0.233337	4.40345	-4.01823	0.265946	8.95452	-17.5127	0.787507	100.808	-2207.83	0.199094	18.7314	-76.6068	0.269957	4.86064	-4.97755
red	262	14	3.89166	-5.15192	14	4.96643	-8.94374	14	2.81689	-1.36009	0.430561	0.119277	0	0.484068	9.04924	-17.8875	0.188716	14.9833	-49.0708	0.0252476	0.883615	0	0.113785	1.81166	-0.200423	0.167282	2.81689	-1.36009	0.636041	89.5936	-1744.14	0.145892	11.1504	-27.1929	0.120907	1.92469	-0.311211
royalblue	103	17	1.51837	-1.37144	14.5	2.93946	-2.74288	18	0.0972807	0	0.374859	-2.45012	0	0.446155	5.08737	-5.48577	0.193451	9.72317	-20.6652	0.0257999	0.79155	0	-0.00867805	0.0972807	0	0.069444	0.0282154	0	0.346007	45.4195	-448.761	0.137439	7.41274	-11.9533	-0.00257239	0.162644	0
turquoise	399	11	6.40011	-11.6269	9	9.24355	-20.7828	12	3.55667	-2.47104	0.394116	-3.32915	0	0.532405	12.3822	-33.5319	0.258137	25.8934	-146.148	0.0344368	6.10495	-8.03362	0.19775	3.55667	-2.47104	0.112964	1.92896	-0.315491	0.677692	85.8	-1599.64	0.156306	13.7791	-41.5139	0.231898	4.29302	-3.79961
white	532	8	11.2067	-28.5488	10	10.0445	-23.6373	6	12.3689	-33.4603	0.434918	0.6356	0	0.472809	12.7542	-35.5755	0.217769	27.2178	-161.444	0.0346837	7.33472	-11.699	0.315808	7.30104	-11.5901	0.326846	12.3689	-33.4603	0.651736	85.7247	-1596.83	0.248527	31.0878	-210.5	0.230365	5.55716	-6.60769
