# Supplementary material for: FoxP2 isoforms delineate spatiotemporal transcriptional networks for vocal learning in the zebra finch
Source: eLife. 2018 Jan 23;7:e30649. doi: 10.7554/eLife.30649 (PMC5826274; doi:10.7554/eLife.30649)
Supplement: Supplementary file 4. — Module preservation statistics with Z scores and Bonferroni-corrected log10 p-values are presented in columns C-AL. Column C is the basis for the scatter plot presented as Figure 5B. [file elife-30649-supp4.xlsx]

## Sheet: observed
module	moduleSize	medianRank.pres	Zsummary.pres	log.p.Bonfsummary.pres	medianRankDensity.pres	Zdensity.pres	log.p.Bonfdensity.pres	medianRankConnectivity.pres	Zconnectivity.pres	log.p.Bonfconnectivity.pres	propVarExplained.pres	Z.propVarExplained.pres	log.p.Bonf.propVarExplained.pres	meanSignAwareKME.pres	Z.meanSignAwareKME.pres	log.p.Bonf.meanSignAwareKME.pres	meanSignAwareCorDat.pres	Z.meanSignAwareCorDat.pres	log.p.Bonf.meanSignAwareCorDat.pres	meanAdj.pres	Z.meanAdj.pres	log.p.Bonf.meanAdj.pres	cor.kIM	Z.cor.kIM	log.p.Bonf.cor.kIM	cor.kME	Z.cor.kME	log.p.Bonf.cor.kME	cor.kMEall	Z.cor.kMEall	log.p.Bonf.cor.kMEall	cor.cor	Z.cor.cor	log.p.Bonf.cor.cor	cor.MAR	Z.cor.MAR	log.p.Bonf.cor.MAR
black	414	3	10.5496	-24.377	3.5	11.2744	-27.7402	3	9.82478	-21.0138	0.276605	2.3318	-0.663897	0.376661	10.9263	-26.0225	0.142692	24.6632	-132.534	0.0171717	11.6225	-29.4579	0.358886	8.57733	-15.9714	0.313087	9.82478	-21.0138	0.395081	47.1551	-483.58	0.166078	18.8767	-77.71	0.0800752	1.90458	-0.203993
blue	285	2	14.1078	-59.4775	2	20.2725	-105.291	1	7.94306	-13.6636	0.368622	9.59311	-20.0268	0.467883	11.7626	-30.1743	0.21981	28.7825	-180.408	0.0312382	32.2614	-226.572	0.428798	6.97919	-10.486	0.359017	7.94306	-13.6636	0.481635	56.2405	-687.642	0.188254	18.9408	-78.2378	0.324217	5.30862	-5.91541
brown	293	11	2.65413	-1.63467	11.5	3.69317	-3.26934	11	1.61508	0	0.312777	6.69268	-9.61792	0.102343	-0.376463	0	0.0266394	1.90426	-0.203681	0.0128831	5.48208	-6.335	-0.00153627	-0.0577138	0	0.104225	1.61508	0	0.0234033	1.62123	0	0.0342798	3.45634	-2.22018	0.00811059	0.223267	0
cyan	156	4	7.21568	-13.1541	4	9.54954	-21.3713	4	4.88182	-4.93697	0.300142	3.15953	-1.75988	0.334949	6.88302	-10.1907	0.124512	13.9691	-42.5773	0.0200295	12.2161	-32.5518	0.26493	4.06876	-3.28407	0.312172	4.88182	-4.93697	0.413084	51.8112	-583.682	0.207144	13.6546	-40.6808	-0.0485681	-0.634817	0
darkgreen	45	19	0.0842031	0	15.5	0.543374	0	21	-0.374968	0	0.316145	1.55815	0	0.00798204	-1.46495	0	0.0244493	0.498737	0	0.0111747	0.588011	0	-0.043573	-0.374968	0	0.00794417	-1.23044	0	0.0299524	2.75812	-1.19418	0.00956747	0.210648	0	-0.121267	-0.724082	0
darkgrey	99	20	-0.458873	0	18	0.0252145	0	20	-0.942961	0	0.248134	-0.264826	0	0.0981521	-0.304995	0	0.0284836	1.05409	0	0.00990895	0.315255	0	-0.125522	-1.28614	0	0.0189388	-0.942961	0	0.00645212	-0.448538	0	0.0181137	0.818274	0	-0.0743082	-0.666949	0
darkred	98	16	0.19161	0	14.5	0.486691	0	19	-0.10347	0	0.262252	0.274979	0	0.153498	0.698402	0	0.0334438	1.3935	0	0.00885656	-0.621991	0	-0.0252565	-0.10347	0	0.0230312	-0.956062	0	0.0283682	1.63787	0	0.0198311	0.747316	0	0.0125824	0.262592	0
darkturquoise	51	13	0.5082	0	11.5	0.79242	0	15	0.223979	0	0.317888	1.98766	-0.287905	0.128193	0.0293557	0	0.0155711	-0.0750132	0	0.0119073	1.55548	0	0.0507212	0.223979	0	0.0381911	-0.936987	0	0.0359759	3.37249	-2.0865	0.0363135	0.883399	0	-0.0498106	-0.351041	0
gold	1000	17	0.892262	0	20.5	0.216696	0	14	1.56783	0	0.244828	-0.678186	0	0.0430947	1.11158	0	0.0266012	30.0518	-196.643	0.00919691	-1.28312	0	-0.0564648	-1.93051	0	0.0506118	1.56783	0	0.00909455	-0.0445096	0	0.0964418	35.4447	-273.415	-0.0439281	-1.47358	0
green	449	11	1.86978	-1.04545	11.5	3.10812	-2.09091	11	0.631448	0	0.263772	1.68919	0	0.202602	4.52705	-4.18181	0.0614614	10.1228	-22.3176	0.0103521	1.65626	0	0.0367433	0.631448	0	0.041335	0.268652	0	0.0419853	3.75306	-2.71634	0.0536729	7.04566	-10.6924	-0.0207125	-0.510444	0
greenyellow	112	14	0.570694	0	16	0.377995	0	14	0.763393	0	0.284512	1.5764	0	0.0921975	-0.433203	0	0.00725927	-0.595245	0	0.0108963	1.18919	0	-0.162247	-1.72026	0	0.113872	0.763393	0	0.0312983	1.95952	-0.259182	0.0382559	2.0534	-0.356179	-0.181804	-1.86819	0
grey60	144	13	0.397825	0	14	0.646051	0	13	0.1496	0	0.255723	0.0648609	0	0.158394	1.18605	0	0.0388622	2.65844	-1.06371	0.00970671	0.106056	0	-0.0202331	-0.224652	0	0.155203	1.65941	0	0.0245968	2.12881	-0.436554	0.00587334	0.1496	0	-0.0586477	-0.632395	0
lightgreen	97	10	0.869234	-0.175369	9	1.91523	-0.350737	14	-0.176762	0	0.282308	1.46643	0	0.179311	1.38566	0	0.0555036	3.40659	-2.14052	0.0120209	2.36403	-0.701475	-0.0222524	-0.176762	0	0.077554	-0.177133	0	0.0362692	2.72404	-1.14912	0.0226049	0.934511	0	0.00497785	0.0203512	0
magenta	143	19	0.0260875	0	16	0.970274	0	19	-0.918099	0	0.279574	1.67076	0	0.033395	-2.47647	0	0.0172403	0.269788	0	0.0112737	2.45677	-0.811886	-0.0684036	-0.980425	0	0.0157108	-0.918099	0	0.0306568	2.89513	-1.37997	0.0788146	5.44956	-6.25536	-0.00251038	0.0250443	0
midnightblue	94	13	0.614982	-0.184455	12	1.64848	-0.368911	13	-0.418512	0	0.309549	2.39488	-0.737821	0.0636977	-0.949236	0	0.024736	0.902075	0	0.0138222	3.40886	-2.14412	-0.113793	-1.15171	0	0.0643554	-0.418512	0	0.0268469	1.62559	0	0.043095	2.18994	-0.503329	-0.0490534	-0.475661	0
orange	106	5	3.11711	-2.17049	5	4.6039	-4.34098	13	1.63033	0	0.267447	0.63607	0	0.321695	4.58679	-4.30529	0.11216	9.3549	-19.036	0.0146803	4.621	-4.37667	0.145399	1.63033	0	0.0271433	-0.992306	0	0.379782	46.2507	-465.227	0.0403674	2.13749	-0.445949	0.0655034	0.611614	0
pink	241	8	1.98461	-1.06174	11.5	2.4333	-2.12349	7	1.53591	0	0.254326	0.307941	0	0.118426	-0.0413981	0	0.0714764	7.73754	-12.9528	0.0122841	4.55867	-4.24697	0.0958974	1.53591	0	0.0979509	1.38805	0	0.12007	12.9906	-36.8178	0.122924	10.624	-24.5958	-0.0239658	-0.482377	0
purple	188	17	1.1673	-1.01833	9.5	3.05287	-2.03666	18	-0.718276	0	0.25935	0.415902	0	0.279963	4.47396	-4.07333	0.0851692	7.83101	-13.2738	0.0110101	1.63179	0	-0.0593328	-0.866683	0	0.0241555	-0.718276	0	0.0481463	4.76589	-4.6844	0.0277793	1.90607	-0.205479	-0.0639261	-0.818015	0
red	210	12	1.49422	-0.0480319	14.5	1.6182	-0.0960637	10	1.37024	0	0.282735	2.1332	-0.441301	0.126766	0.457066	0	0.0277353	1.89262	-0.192127	0.0108475	1.34378	0	-0.00385802	-0.195703	0	0.103249	1.37024	0	0.0129692	0.413544	0	0.0589281	5.65458	-6.76485	-0.0285314	-0.56609	0
royalblue	122	1	9.81481	-29.9989	1	15.3482	-56.308	3	4.2814	-3.68974	0.374508	6.25401	-8.35651	0.539709	10.5824	-24.403	0.283488	28.222	-173.462	0.0317735	20.114	-88.213	0.353042	3.72839	-2.67371	0.323257	4.2814	-3.68974	0.468316	49.4102	-530.887	0.181458	10.3475	-23.3254	0.313563	3.14235	-1.73434
turquoise	586	12	2.34287	-0.912809	15	1.5789	-0.143709	9	3.10683	-1.68191	0.255303	0.482933	0	0.151786	1.98719	-0.287418	0.0354005	4.80993	-4.77969	0.0102499	1.17062	0	0.0198927	0.455605	0	0.115527	3.10683	-1.68191	0.040202	4.04606	-3.24188	0.0663336	10.5735	-24.3616	-0.0366936	-0.826247	0
white	450	9	3.27381	-1.98869	11	2.78151	-1.23839	6	3.76611	-2.73899	0.281707	3.03661	-1.57974	0.168201	2.52641	-0.897028	0.0383381	4.82883	-4.82081	0.0104717	1.83539	-0.136127	0.122753	2.3879	-0.729563	0.145628	3.76611	-2.73899	0.0344161	3.45282	-2.2145	0.0827091	12.6644	-34.9894	0.00664277	0.0856022	0
