# Supplementary material for: FoxP2 isoforms delineate spatiotemporal transcriptional networks for vocal learning in the zebra finch
Source: eLife. 2018 Jan 23;7:e30649. doi: 10.7554/eLife.30649 (PMC5826274; doi:10.7554/eLife.30649)
Supplement: Supplementary file 5. — Pairwise protein level interactions between genes in singing and learning modules. These nodes were linked with edges and presented as Figure 7. Columns are defined as follows: [A-B] Nodes 1 and 2, one of which is in a song production module and the other in a learning module. [C-F] Methods for weighting the protein interaction scores as described in Methods: Protein Interaction Networks and Scaling of Interaction Confidence Scores. Figure 7 uses weighted kIN (column C) as the metric for dictating edge width. [file elife-30649-supp5.xlsx]

## Sheet: proteinEdgeList
node1	node2	weighted.kIN	weightedAdultDelta.kIN	weighted.GS	weighted.GSxkIN
AATF	E2F3	0.0524691	NA	0.148989	0.00867628
AATF	TFDP1	0.0431203	0.0247601	0.146153	0.0070024
AATF	WDR75	0.0212174	-0.0096071	0.25376	0.00555065
ABCC8	RAPGEF4	0.0436563	NA	0.074115	0.00324532
ACP1	CTNNB1	0.047715	0.030148	0.362234	0.0185251
ACTB	ACTL6A	0.15559	0.0634529	0.11464	0.0186773
ACTB	ACTR2	0.11677	-0.0738663	0.134809	0.0163125
ACTB	ARPC5	0.31974	0.244614	0.305482	0.103251
ACTB	GTF2A1	0.349385	0.230067	0.304528	0.118219
ACTB	NCKAP1	0.212546	0.136479	0.204071	0.0456575
ACTB	RHOA	0.121366	0.022805	0.415832	0.0544423
ACTL6A	RUVBL2	0.0283291	0.0115532	0.0907102	0.00257231
ACTR2	ARPC4-TTLL3	0.053287	-0.0337082	0.0924558	0.00494152
ACTR3	ACTB	0.315202	0.21072	0.136663	0.0449181
ACTR3	ARPC4-TTLL3	0.144449	0.0965678	0.094125	0.0136646
ACTR3	BAIAP2	0.188585	0.126074	0.102312	0.0214383
ACTR3	PDGFB	0.260865	0.174395	0.0875133	0.0253657
ACTR3	WDR1	0.143449	0.0958994	0.104131	0.0163073
ACTR6	RUVBL2	0.030665	0.00464959	0.201708	0.00670864
ACVR1	PRKACB	0.07929	0.0563697	0.202215	0.0176582
ACVR2A	BMP3	0.013467	NA	0.0815514	0.00119636
AGMAT	SAT1	0.0175831	NA	0.071657	0.00138456
AGO3	TFDP1	0.0454742	0.0261117	0.195402	0.00954431
AGT	ADRA1D	0.0471823	NA	0.130553	0.00675415
AGT	CHD9	0.211172	NA	0.171166	0.0401617
AGT	CXCR4	0.106917	NA	0.206504	0.024532
AGT	EDN1	0.0499372	NA	0.176181	0.00908882
AGT	HTR2A	0.168578	NA	0.224431	0.0415758
AGT	NCOA2	0.264783	NA	0.203559	0.0598878
AGT	TBL1XR1	0.0716428	NA	0.18589	0.0147975
AHI1	NPHP1	0.169073	0.0456091	0.178724	0.0307712
AHI1	TMEM67	0.0387348	NA	0.0096416	0.00040594
ALAS1	GCAT	0.13134	NA	0.249388	0.0359151
ALS2	RAB5A	0.0373052	0.0326167	0.149867	0.00563593
ALS2	RAC1	0.00480361	-0.0185909	0.108233	0.000526226
AMOTL2	YWHAB	0.139542	0.0742242	0.131904	0.0203383
ANAPC4	BRCC3	0.0830502	0.0360151	0.17123	0.0158008
ANAPC4	PSMC6	0.00223556	-0.0939989	0.0699428	0.000173157
ANAPC4	PSMD14	0.0333484	-0.00584755	0.226051	0.00837604
ANAPC4	UBE2D1	0.0438212	NA	0.230963	0.0112207
ANPEP	AGT	0.0485714	NA	0.217743	0.0113234
ANPEP	GCLM	0.0405314	NA	0.29281	0.0130994
ANXA1	AGT	0.0615872	NA	0.131626	0.00896734
ANXA1	GNAI1	0.0784065	0.0568753	0.15251	0.0132864
ANXA1	SSTR1	0.0402428	0.0227867	0.108736	0.00485667
AQP3	EXOC3	0.0231064	NA	0.062073	0.00159365
ARAP3	ARHGEF7	0.125956	0.0752041	0.153568	0.020754
ARAP3	KALRN	0.0430368	-0.0924193	0.0906246	0.00433355
ARAP3	RHOA	0.0718152	0.0134942	0.242115	0.0182642
ARAP3	VAV3	0.0521992	NA	0.0279507	0.00161216
ARF4	ASAP1	0.311196	0.0779577	0.379607	0.127435
ARFGEF1	RHOA	0.0456255	0.00857312	0.157773	0.00760938
ARG2	NOS2	0.0698579	-0.00852089	0.221723	0.0164778
ARHGAP10	FGD4	0.0831098	NA	0.111341	0.0102023
ARHGAP10	MCF2	0.0712157	NA	0.0752403	0.00594046
ARHGAP10	PLEKHG5	0.0967283	NA	0.108016	0.0116091
ARHGAP10	RHOBTB2	0.149219	NA	0.153459	0.0251914
ARHGAP10	VAV2	0.0185657	NA	0.038097	0.000785886
ARHGAP18	FGD3	0.0409678	-0.0830948	0.063216	0.00287758
ARHGAP18	FGD4	0.0385411	-0.0781726	0.070992	0.00304012
ARHGAP18	MCF2	0.0332084	-0.0673564	0.04824	0.00177997
ARHGAP18	PLEKHG5	0.0452053	-0.0916897	0.069408	0.00348624
ARHGAP18	RHOBTB2	0.0698898	-0.141757	0.0988253	0.00758164
ARHGAP18	VAV2	0.00867656	-0.0175986	0.02448	0.000236002
ARHGAP20	ARHGEF7	0.218562	0.130496	0.20217	0.0487711
ARHGAP20	RHOA	0.133308	0.0250489	0.340977	0.0459142
ARHGAP20	VAV3	0.0926618	NA	0.0376438	0.00387571
ARHGAP26	ARHGEF7	0.0320972	0.0191642	0.13099	0.00465088
ARHGAP26	RHOA	0.0192638	0.0036197	0.217388	0.00430835
ARHGAP26	VAV3	0.0136381	NA	0.024444	0.000370411
ARHGAP45	ARHGEF7	0.0308111	0.0183963	0.179245	0.00612279
ARHGAP45	RHOA	0.0179419	0.00337131	0.288624	0.00550313
ARHGAP45	VAV3	0.0131207	NA	0.0335232	0.000488719
ARHGEF7	RHOBTB2	0.229786	0.137198	0.254026	0.0644991
ARNTL	CRY2	0.0565327	0.0496009	0.370699	0.0209776
ARPC1A	ACTR2	0.079913	-0.0505513	0.123853	0.00990737
ARPC1A	ACTR3	0.217062	0.145111	0.126343	0.0274516
ARPC1A	ARPC5	0.223213	0.170767	0.286293	0.0639683
ARPC1A	NCKAP1	0.13474	0.0865186	0.173671	0.0256865
ARPC1A	RAC1	0.0211927	-0.0820198	0.179962	0.00404013
ARPC5	ARPC4-TTLL3	0.148692	0.113755	0.213503	0.0318736
ASAP1	RHOA	0.170173	0.0319759	0.415542	0.0761185
ASAP2	BIN1	0.0997973	0.00410199	0.105676	0.0109514
ASF1A	H2AFZ	0.195089	NA	0.192199	0.0414778
ATAD5	XRCC3	0.099301	NA	0.171597	0.0188285
ATF2	ACTB	0.512741	0.350647	0.205248	0.115902
ATF2	BCL2	0.119894	0.0819917	0.0128473	0.00163689
ATF2	CREM	0.280262	0.191663	0.239801	0.0703005
ATF2	DUSP5	0.46546	0.318313	0.188165	0.0939736
ATF2	FOS	0.397596	0.271903	0.212841	0.0853934
ATF2	GTF3A	0.265774	0.181754	0.134046	0.0386818
ATF2	HIST1H2BJ	0.0893611	0.0611112	0.0823032	0.0081719
ATF2	IRF2	0.493679	0.337611	0.172674	0.0934711
ATF2	MAP3K7	0.118645	0.0811376	0.0634643	0.0081756
ATF2	NCOA6	0.0537186	0.0367365	0.194424	0.0108455
ATF2	NOS2	0.221747	0.151645	0.12888	0.0311315
ATF2	PLAU	0.173725	0.118805	0.102419	0.0194669
ATF2	RUVBL2	0.0979937	0.0670147	0.170469	0.0167552
ATF2	TGFB2	0.261583	0.178888	0.162529	0.0432941
ATIC	ENTPD5	0.0250318	-0.00696004	0.271023	0.00750462
ATIC	MTHFD2	0.0301992	-0.00839685	0.226733	0.00713245
ATIC	SHMT1	0.021034	-0.00584848	0.282205	0.00600194
ATIC	TBC1D4	0.0401557	-0.0111652	0.21136	0.00901945
B4GALT7	SDC2	0.134175	NA	0.163741	0.0241427
BAIAP2	ACTR2	0.0698919	-0.0442122	0.100965	0.00778875
BAIAP2	ARPC5	0.195222	0.149353	0.233386	0.0502892
BAIAP2	NCKAP1	0.135217	0.0868252	0.162449	0.0231708
BAIAP2	RAC1	0.0216285	-0.0837065	0.171189	0.00370625
BAIAP2	VAV3	0.0578198	NA	0.0393711	0.00251262
BARD1	ANAPC4	0.0348201	NA	0.127238	0.00492272
BARD1	ATR	0.0903747	NA	0.170442	0.0166167
BARD1	BMI1	0.13275	NA	0.126953	0.0183184
BARD1	CBX4	0.0317628	NA	0.180029	0.00635358
BARD1	CDC23	0.0695986	NA	0.223904	0.0172192
BARD1	FANCL	0.170839	NA	0.236248	0.0431662
BARD1	UIMC1	0.0990655	NA	0.176211	0.0175441
BARD1	XRCC6	0.103385	NA	0.193831	0.0206804
BCL11A	NR2F2	0.0530958	-0.273375	0.0999446	0.00545389
BCL2	BAG1	0.0146609	-0.00469066	0.0160768	0.000238082
BCL2	PARK2	0.0504602	-0.00859785	0.0261184	0.00137143
BCL2	PRKACB	0.120201	0.0854549	0.0173813	0.00228835
BCL2	RAC1	0.0073865	-0.0285872	0.0125073	9.58354e-05
BCL2	RHOA	0.0282405	0.00530644	0.0259015	0.000765136
BCL2	XIAP	0.0510565	0.0151656	0.0159304	0.000902721
BHLHE41	CRY2	0.133785	0.117381	0.37809	0.0515098
BHLHE41	PER2	0.0873262	NA	0.0575954	0.00508553
BIN1	PPP3CB	0.0786241	0.0224917	0.0719433	0.00628498
BIRC3	CFLAR	0.00240007	-0.0124694	0.0327786	8.04407e-05
BIRC3	UBE2D1	0.0168569	NA	0.0768577	0.00130867
BIRC3	XIAP	0.0224933	0.00668132	0.0466823	0.00106929
BMPR1A	ACVR2A	0.0431861	NA	0.311938	0.0142706
BMPR1A	MAP3K7	0.0190593	NA	0.0978239	0.00200263
BMPR1A	PPP1CA	0.116159	NA	0.189133	0.0244106
BMPR1A	SMAD7	0.0176924	NA	0.267818	0.00474309
BMPR1A	SMURF1	0.0428384	NA	0.313722	0.0137981
BMPR1A	TAB2	0.0155282	NA	0.296731	0.00510831
BRCC3	BMI1	0.315593	0.136858	0.170289	0.0586062
BRCC3	CDC23	0.165084	0.0715895	0.299653	0.0549644
BRCC3	UIMC1	0.237233	0.102877	0.238088	0.0565389
BRD8	ACTL6A	0.126789	0.0517072	0.0689987	0.0089542
BTG1	CNOT7	0.0151867	0.0105269	0.152593	0.00246793
BUB1	CDCA8	0.00320739	-0.0555728	0.0147949	4.95334e-05
BUB1	CKAP5	0.0236747	-0.4102	0.0249301	0.000637381
BUB1	CLASP2	0.0173975	-0.301437	0.0180566	0.000329632
BUB1	INCENP	0.0167622	-0.29043	0.0238302	0.000401051
BUB1	NDEL1	0.00833408	-0.1444	0.0204706	0.000178269
BUB1	SGO2	0.00648095	-0.112292	0.0131912	8.93328e-05
BUB1	TTK	0.0044321	-0.0767925	0.00538632	2.59486e-05
BUB1	ZWILCH	0.0341717	-0.592074	0.0307524	0.00107121
CAB39	SIK1	0.110656	0.0133127	0.196669	0.0237582
CAB39	SIK2	0.286236	0.0344362	0.31389	0.0968176
CAB39	STK11	0.135487	0.0163001	0.228959	0.0310521
CAB39	STK24	0.0395328	0.00475608	0.141003	0.00591118
CALM1	STRN3	0.100856	0.0602489	0.105944	0.0117547
CAPZB	CAPZA2	0.244862	0.216942	0.120308	0.0294883
CAPZB	MTPN	0.1719	0.162007	0.0759251	0.0142952
CBL	ARHGEF7	0.0352858	0.021068	0.136897	0.00483536
CBL	IFNGR1	0.0171086	-0.0226522	0.138226	0.00262761
CBL	PLCG2	0.0195793	NA	0.0754134	0.00161371
CBL	SDC2	0.0375381	NA	0.110521	0.00460972
CBL	SORBS2	0.0357102	0.0280758	0.129106	0.0048226
CBL	UBE2D1	0.0278893	NA	0.223608	0.00628654
CBL	VAV3	0.0140948	NA	0.024016	0.000362034
CBL	YWHAB	0.0304026	0.0161715	0.0820135	0.00266676
CBL	YWHAZ	0.048276	NA	0.18058	0.009284
CBX4	BRCC3	0.0761791	0.0330354	0.243619	0.0205068
CBX4	HNRNPK	0.0380016	0.00564224	0.15315	0.00638853
CBX4	TFDP1	0.0237557	0.0136408	0.183992	0.00484037
CCAR1	HNRNPD	0.0918126	0.0333717	0.186377	0.018992
CCAR1	HNRNPK	0.046569	0.00691427	0.135202	0.00650439
CCAR1	NCBP2	0.0505772	NA	0.148777	0.00836082
CCAR1	NFX1	0.050514	0.00205635	0.0522276	0.00292486
CCAR1	POLR2L	0.0119188	NA	0.0560898	0.000742805
CCAR1	SRSF7	0.0514459	NA	0.250216	0.0143029
CCAR1	U2AF1	0.114359	0.0806118	0.224708	0.0284577
CCDC12	CRNKL1	0.0604864	NA	0.374475	0.0226733
CCNC	CHD9	0.0724644	-0.0989426	0.303831	0.0244633
CCND2	CCNE1	0.0312719	-0.00862767	0.258352	0.00873426
CCND2	E2F3	0.0853762	NA	0.265902	0.0233077
CCND2	FOXO1	0.0486081	-0.0100961	0.226318	0.0113646
CCND2	TFDP1	0.0686555	0.0394227	0.255231	0.0184066
CCNE1	CCNE2	0.0275687	-0.00760597	0.21245	0.00647895
CCNE1	PLK3	0.0501663	-0.0138404	0.288279	0.014712
CCNE2	TFDP1	0.0632974	0.036346	0.219496	0.0142791
CCNT2	NCBP1	0.14663	0.0713507	0.145906	0.0232546
CCR4	AGT	0.0167615	NA	0.15313	0.00285187
CCR4	GNAI1	0.0215053	0.0155998	0.178808	0.0042584
CD40	TDP2	0.148415	0.108572	0.167087	0.0249981
CDC14A	CDC23	0.0901921	0.0779157	0.0895354	0.00866457
CDC14A	INCENP	0.108879	0.0940593	0.0708487	0.00825022
CDC14A	PLK3	0.167049	0.144312	0.0975448	0.0179261
CDC14A	WWC1	0.0134422	0.0116125	0.0717115	0.00104212
CDC23	PSMC6	0.00444868	-0.187054	0.122535	0.00060301
CDC23	PSMD14	0.0662886	-0.0116235	0.39559	0.0291368
CDCA8	NSL1	0.0628369	0.049613	0.159597	0.0110935
CDH11	CDH18	0.109496	-0.0150466	0.0350633	0.00426114
CDH11	CDH8	0.0588205	-0.00808295	0.121332	0.00791218
CDH11	CTNNA1	0.0345498	-0.00474774	0.0493252	0.00187067
CDH11	CTNND1	0.17582	-0.0241607	0.152635	0.0276663
CDH18	CDH7	0.034729	-0.0257168	0.026484	0.00102082
CDH7	CDH8	0.0186355	-0.0137996	0.0915425	0.00189339
CDH7	CTNND1	0.052833	-0.0391228	0.109227	0.00627942
CDH9	CDH11	0.0449002	-0.00617006	0.0696185	0.00346935
CDH9	CDH7	0.0151104	-0.0111892	0.0557941	0.000881871
CDK19	CCNC	0.0802335	-0.109551	0.402527	0.0323285
CDK19	CDK8	0.173029	-0.0470281	0.226618	0.0422537
CDK8	CHD9	0.169352	-0.0460287	0.185368	0.0346495
CDK8	MAML3	0.0458327	-0.012457	0.213681	0.0108697
CDK8	NCOA2	0.214222	-0.0582238	0.222394	0.0521244
CDK8	TBL1XR1	0.0573282	-0.0155814	0.200869	0.0127383
CDKN1B	CCNE1	0.0164035	-0.0045256	0.239161	0.00392701
CDKN1B	COPS5	0.0619334	-0.0066562	0.083916	0.0052024
CDKN1B	E2F3	0.0402317	NA	0.22113	0.00941422
CDKN1B	FOXO1	0.0241938	-0.00502515	0.198797	0.00484844
CDKN1B	MNAT1	0.0783426	0.0473531	0.1782	0.0155118
CDKN1B	PSMC6	0.00281136	-0.11821	0.115566	0.000347484
CDKN1B	PSMD14	0.0414025	-0.00725982	0.368736	0.0165941
CDKN1B	RHOA	0.0412954	0.00775948	0.382633	0.0158327
CDKN1B	SKP2	0.0310618	-0.0437444	0.0935064	0.00290738
CDKN1B	TFDP1	0.0324696	0.0186444	0.213025	0.00746152
CDKN1B	UBE2D1	0.053517	NA	0.3706	0.021867
CDKN1B	YWHAB	0.0654451	0.0348111	0.152481	0.0104058
CDKN1B	YWHAQ	0.140465	0.0958401	0.323899	0.0456792
CDKN1B	YWHAZ	0.104448	NA	0.337445	0.0364106
CEBPG	FOS	0.127089	0.0484671	0.387363	0.0499284
CENPU	BUB1	0.00446041	-0.0772832	0.00705883	3.39281e-05
CENPU	NSL1	0.0906092	0.0715407	0.0789551	0.00787892
CEP70	PRKAR2B	0.13797	0.108735	0.134729	0.0206539
CFLAR	BCL2	0.00592541	-0.0307852	0.0121664	7.38638e-05
CFLAR	CD40	0.0114379	-0.0594248	0.0984938	0.00124757
CHN1	FGD4	0.0155887	-0.00459889	0.0315937	0.000541807
CHN1	MCF2	0.0135943	-0.00401052	0.0217281	0.000321063
CHN1	RHOBTB2	0.0288793	-0.00851983	0.0449311	0.0013804
CLASP2	GRAMD3	0.0320264	-0.098385	0.0954342	0.00339602
CNOT1	CNOT7	0.0805781	0.055854	0.16697	0.0134676
CNOT1	EIF4E	0.0393531	-0.0253778	0.114817	0.00489005
CNOT6L	CNOT7	0.095152	0.0659562	0.272683	0.0259983
CNOT6L	EIF4E	0.0458125	-0.0295434	0.184855	0.00930622
CNTN2	LIN7A	0.027224	0.0177207	0.187114	0.00564119
COPS5	EDN1	0.0401639	-0.00431656	0.0563815	0.00250221
COPS5	VEGFA	0.0942453	-0.0101289	0.0915634	0.00942076
CREM	PRKACB	0.293839	0.208899	0.339278	0.102776
CREM	PRKAR2B	0.204596	0.161243	0.244919	0.0543487
CRNKL1	PLRG1	0.0396384	-0.0134062	0.279868	0.0112625
CRY1	CRY2	0.0970186	0.0851225	0.0910544	0.00887837
CRY1	PER2	0.0631321	NA	0.0138278	0.00087385
CSE1L	KPNA4	0.0236803	0.0177894	0.172713	0.00419047
CSNK2A1	CDK11A	0.00951711	-0.0278757	0.124167	0.00129432
CSNK2A1	CTR9	0.00583495	NA	0.155553	0.000913122
CSNK2A1	NAP1L4	0.0812237	0.0547517	0.128975	0.0105924
CTNNA1	CDH7	0.010886	-0.00806111	0.0370109	0.000445195
CTNNA1	EXOC3	0.0200655	NA	0.0418176	0.000932324
CTNNA1	RAC1	0.00339895	-0.0131546	0.0549331	0.000199695
CTNNA1	RHOA	0.013272	0.00249383	0.116186	0.00162831
CTNNB1	CBLL1	0.0334331	0.0106704	0.154668	0.00557223
CTNNB1	CDC73	0.0487182	0.00132135	0.0382561	0.00188832
CTNNB1	FOXO1	0.0201681	-0.00418899	0.214254	0.00435155
CTNNB1	RAC1	0.00885758	-0.0342806	0.195897	0.00175093
CTNNB1	RHOA	0.0334246	0.00628054	0.40041	0.0137975
CTNND1	RHOA	0.0668474	0.0125608	0.355849	0.0238353
CUL5	CISH	0.103206	0.0696615	0.176138	0.019216
CUX1	ZMYM2	0.0256105	-0.00951452	0.0314194	0.000881344
CYFIP1	EIF4E	0.0547173	-0.0352858	0.0428998	0.00239771
CYFIP1	FMR1	0.257205	0.232488	0.0551295	0.0144395
CYFIP1	FXR1	0.139943	0.1152	0.0442637	0.00644575
CYFIP1	NCKAP1	0.0891972	0.0572749	0.0427972	0.00382121
CYFIP1	RAC1	0.0134442	-0.0520315	0.0424973	0.000575947
CYR61	RHOA	0.0847557	0.0159258	0.320363	0.0293541
DDIT4	YWHAZ	0.117453	NA	0.354307	0.0423772
DDX18	NIFK	0.246493	NA	0.138704	0.0366841
DDX20	GEMIN8	0.157182	0.125502	0.0390208	0.00653877
DDX20	SMN1	0.042751	NA	0.0690908	0.00295666
DDX54	RPF1	0.241574	0.220702	0.244242	0.0613333
DEF6	RAC1	0.0157272	-0.0608675	0.0972511	0.00158332
DEF6	RHOA	0.059942	0.0112632	0.200771	0.0126017
DEPDC7	FGD3	0.174808	0.0806128	0.159007	0.0308497
DEPDC7	FGD4	0.16427	0.0757535	0.178367	0.0325561
DEPDC7	MCF2	0.141541	0.065272	0.121203	0.0190614
DEPDC7	NGEF	0.336666	0.155254	0.219251	0.082016
DEPDC7	PLEKHG5	0.192675	0.0888523	0.174388	0.0373334
DEPDC7	RAC2	0.0971231	0.0447885	0.254707	0.0274866
DEPDC7	RHOBTB2	0.294288	0.135712	0.2453	0.0802101
DEPDC7	VAV2	0.037269	0.0171867	0.0619844	0.00254696
DHX8	PLRG1	0.032539	-0.0110051	0.175411	0.00625159
DLC1	FGD3	0.0499101	NA	0.101146	0.0056091
DLC1	FGD4	0.0469536	NA	0.113587	0.00592592
DLC1	MCF2	0.0409964	NA	0.0782131	0.00351585
DLC1	PLEKHG5	0.0550725	NA	0.111053	0.00679551
DLC1	RHOBTB2	0.0857992	NA	0.159335	0.014892
DLC1	VAV2	0.0106879	NA	0.0396032	0.000465137
DLL4	PSEN2	0.153962	0.0164993	0.263312	0.0437327
DNAJC8	HNRNPD	0.0882476	0.0320759	0.183222	0.0179654
DNAJC8	HNRNPK	0.0416627	0.00618581	0.123714	0.00572695
DNAJC8	NCBP2	0.0487755	NA	0.146746	0.00793529
DNAJC8	NFX1	0.0484988	0.00197431	0.0512865	0.0027637
DNAJC8	POLR2L	0.0115197	NA	0.0554468	0.000706563
DNAJC8	SRSF7	0.0495032	NA	0.246253	0.0135448
DNAJC8	U2AF1	0.110041	0.0775678	0.221149	0.0269495
DOCK7	RAC1	0.00299927	-0.0116078	0.0860959	0.000274415
DOK1	GFRA1	0.0566508	-0.0407148	0.0516958	0.0032504
DOK1	IRS1	0.031754	-0.0228215	0.0257807	0.000877426
DOK1	IRS2	0.0677857	-0.0487174	0.054894	0.00406226
DOK1	PDGFB	0.0687993	-0.049446	0.0379368	0.00290003
DOK1	PDGFRB	0.0071859	-0.0051645	0.0124798	9.61186e-05
DTX4	TBK1	0.00692168	-0.0430672	0.147043	0.00106019
E2F3	AGO3	0.0534314	NA	0.192348	0.0114194
E2F3	CCNE2	0.0788329	NA	0.229021	0.0181087
E2F3	EED	0.0306135	NA	0.122986	0.00417875
E2F3	EZH2	0.0390188	NA	0.164916	0.00680215
E2F3	MAML3	0.0339499	NA	0.189189	0.00713661
E2F3	PLAU	0.0408065	NA	0.122148	0.00553826
E2F3	RBBP7	0.0141652	NA	0.1957	0.00293347
E2F3	RYBP	0.099982	NA	0.228022	0.0235518
ECT2	ARAP3	0.0315211	NA	0.141847	0.00496797
ECT2	ARHGAP20	0.0562657	NA	0.1921	0.0120096
ECT2	ARHGAP26	0.00828127	NA	0.12474	0.00114778
ECT2	ARHGAP45	0.00796708	NA	0.171072	0.00151438
ECT2	MYO9A	0.0082568	NA	0.138693	0.00126537
ECT2	RAC2	0.0203913	NA	0.261778	0.00568478
ECT2	RHOBTB2	0.0606025	NA	0.247277	0.016271
ECT2	STARD13	0.0287111	NA	0.135432	0.00432045
ECT2	STARD8	0.0357361	NA	0.11975	0.0047549
EDN1	RHOA	0.0277845	0.00522075	0.266725	0.00790065
EED	TFDP1	0.0252149	0.0144786	0.120913	0.00338005
EFNB1	EFNB2	0.098608	-0.153199	0.330455	0.0356515
EFNB1	EPHA5	0.15013	-0.0253636	0.180819	0.0291582
EFNB1	KALRN	0.0704388	-0.151264	0.17425	0.0133123
EFNB1	RAC1	0.0290732	-0.112519	0.212581	0.00664561
EFNB2	DLL4	0.0419933	-0.0652414	0.299089	0.0133331
EFNB2	EPHA4	0.0878035	-0.136413	0.284791	0.0250307
EFNB2	EPHB3	0.0425954	-0.0661768	0.309934	0.013215
EFNB2	RGS3	0.149099	-0.231641	0.23527	0.0355045
EFNB2	VEGFA	0.0562471	-0.0873863	0.316202	0.0194377
EGR2	CCNC	0.043713	-0.0596856	0.394414	0.0189462
EGR2	CDK8	0.102598	-0.0278854	0.241666	0.0269504
EGR2	MED17	0.138362	0.102135	0.235875	0.0362622
EGR2	MED23	0.0367419	-0.024543	0.242322	0.00989264
EGR2	NR2F2	0.0289852	-0.149237	0.110526	0.00351274
EGR3	RHOA	0.0776455	0.0145897	0.356991	0.0306624
EIF1AX	RPL17	0.152379	0.121071	0.191593	0.0300358
EIF1AX	RPS6	0.223653	0.1777	0.188196	0.0433923
EIF3I	EIF1AX	0.253968	0.201786	0.18623	0.0490118
EIF3I	EIF3L	0.0814448	-0.136539	0.131703	0.0107373
EIF3I	EIF4E	0.0772784	-0.049835	0.166989	0.0135696
EIF3I	RPS8	0.187436	NA	0.243853	0.0466872
EIF4E	RPL17	0.0441449	-0.028468	0.163566	0.00791735
EIF5	EIF1AX	0.396897	0.315348	0.192212	0.0765947
EIF5	EIF4E	0.11984	-0.0772821	0.171028	0.0210431
EIF5	RPS12	0.127144	NA	0.157755	0.021969
EIF5	RPS8	0.264961	NA	0.227663	0.0659975
ELAVL4	BDNF	0.106716	0.0554458	0.130274	0.015227
ELF1	E2F3	0.0544949	NA	0.257151	0.015536
ELF1	TFDP1	0.0449344	0.0258018	0.253096	0.0125804
ENTPD5	PDE10A	0.0308318	NA	0.00958322	0.000327933
ENTPD5	PNPT1	0.0669742	0.0350178	0.207816	0.0154134
EPC1	ACTL6A	0.0977478	0.0398637	0.0924308	0.0092099
EPHA4	RHOA	0.0936681	0.0176004	0.359058	0.0352539
EPHA4	VAV3	0.0687661	NA	0.0418671	0.00314305
EPHA5	EPHA4	0.118365	-0.019997	0.137979	0.0181264
EPHB3	RAC1	0.0117496	-0.0454732	0.186535	0.00230463
EPS8	RAC1	0.0111378	-0.0431054	0.0882051	0.0010429
ERCC6	RBBP7	0.0118546	0.005985	0.134768	0.00177514
ETF1	RPS8	0.285905	NA	0.287133	0.0896209
EXOC2	MYO5A	0.0181524	0.0127398	0.301916	0.00586151
EXOC2	RAB14	0.105535	0.0740671	0.312028	0.0358714
EXOC3	CTNNB1	0.0493354	NA	0.140699	0.0077127
EXOC3	CTNND1	0.0959001	NA	0.121532	0.01295
EXOC3	MYO5A	0.0190352	NA	0.147789	0.00288828
EXOC3	RAB14	0.106236	NA	0.146623	0.016968
EXOC6	MYO5A	0.0229916	0.0049023	0.367721	0.00854853
EXOC6	RAB14	0.131327	0.0280016	0.373377	0.0513986
EXOSC7	PNPT1	0.0128443	0.0067157	0.0817948	0.0010978
EZH2	MTF2	0.0667968	0.0358036	0.106744	0.00716596
EZH2	TFDP1	0.0313217	0.0179852	0.158019	0.00536231
FAF2	SEL1L	0.31962	NA	0.097136	0.0332405
FAF2	USP13	0.141731	NA	0.118353	0.0170644
FAM103A1	NCBP1	0.117636	NA	0.156011	0.0203239
FBXL3	CRY2	0.211929	0.185943	0.268687	0.0569995
FES	IRS2	0.0322826	NA	0.289362	0.00976109
FGD3	ARHGAP10	0.0883429	NA	0.0991451	0.00965685
FGD3	CHN1	0.0165702	-0.00488846	0.0281331	0.000512839
FGD3	RAC1	0.0199148	-0.0770741	0.122647	0.00267523
FGD3	RHOA	0.07644	0.0143632	0.254994	0.021443
FGD4	RHOA	0.072545	0.0136313	0.28888	0.0228536
FGFR1OP2	MOB4	0.220747	NA	0.181422	0.0400886
FGFR1OP2	PDCD10	0.189073	0.0491371	0.307107	0.0581238
FGFR1OP2	STRN3	0.219863	0.131341	0.141531	0.0311487
FGFR1OP2	ZMYM2	0.100652	-0.037393	0.277499	0.0287945
FOS	AGT	0.160384	NA	0.270075	0.0437531
FOS	BAG1	0.0431349	-0.0138007	0.236301	0.0110193
FOS	CBFB	0.204857	NA	0.260423	0.0587549
FOS	COPS5	0.129333	-0.0138999	0.0866566	0.0120772
FOS	CRYZ	0.0288808	NA	0.123414	0.00392975
FOS	RHOA	0.0928337	0.0174436	0.425361	0.0395669
FOS	SDC2	0.178091	NA	0.223949	0.0440698
FOXO1	ETS1	0.0396081	-0.00822676	0.19871	0.00799038
FOXO1	NLK	0.0219087	-0.00455051	0.19371	0.00431732
FOXO3	FOXO1	0.0357791	-0.00743145	0.128122	0.00504299
FOXO3	RAN	0.0230354	-0.175211	0.254846	0.00652275
FZD3	FZD5	0.122916	0.0761228	0.174677	0.0236461
FZD3	WNT10A	0.0304971	0.018887	0.151931	0.00500916
FZD3	WNT4	0.0179367	0.0111083	0.216	0.00403575
GFER	CHCHD4	0.0579901	0.0432368	0.203116	0.0117905
GFER	COPS5	0.0246775	-0.00265218	0.0508334	0.00127484
GGCT	GCLM	0.0167254	NA	0.0788918	0.00135611
GGCX	PROC	0.00827243	NA	0.00106381	9.00744e-06
GNA11	AGT	0.0745289	NA	0.201922	0.0162166
GNA11	GNAI1	0.0928394	0.0673448	0.228922	0.0235099
GNA11	GNB5	0.0496003	-0.0551447	0.287263	0.0150936
GNA11	KALRN	0.0270095	-0.0580015	0.124367	0.00363537
GNAI1	CD3G	0.0186735	0.0135455	0.121666	0.00252435
GNAI1	CXCR4	0.145228	0.105347	0.255286	0.038781
GNAI1	EDN1	0.0593716	0.0430676	0.190638	0.0125761
GNAI1	ITPR3	0.135383	0.0982057	0.231995	0.0344767
GNAI1	MAP3K7	0.060065	0.0435706	0.0919832	0.00611846
GNAI1	PDE3A	0.0724883	0.0525823	0.27589	0.0222209
GNAL	GNAI1	0.325212	0.235906	0.181387	0.065326
GNB5	RGS11	0.0745484	-0.0828816	0.141573	0.0106178
GRB10	GFRA1	0.0431768	-0.133306	0.335219	0.0160462
GRIA2	CTNNA1	0.0218941	0.0188907	0.0143942	0.000350165
GRIA2	CTNNB1	0.0543099	0.0468597	0.0488611	0.00292251
GRIA2	CTNND1	0.10464	0.0902852	0.0418333	0.00486379
GRIA2	GRIA1	0.234366	0.202216	0.0553822	0.0135488
GRM1	AGT	0.0556515	NA	0.080982	0.00500752
GRM1	RHOA	0.0320606	0.00602425	0.126944	0.00450708
GSS	GCLM	0.101926	NA	0.305248	0.0315545
GSS	LAP3	0.015456	NA	0.0679606	0.00113926
GTF3A	BRF1	0.0615523	NA	0.266846	0.0169156
GTF3A	GTF2A1	0.178544	0.117569	0.196078	0.0388982
GUCY1A3	PDE10A	0.0437187	NA	0.0089106	0.000412669
GUCY1A3	POLR2L	0.0248216	NA	0.0700488	0.00193192
GUCY1B3	GUCY1A3	0.154999	0.0670273	0.232176	0.0362771
GUCY1B3	NOS2	0.109144	0.0471978	0.172108	0.0201767
GUCY1B3	PDE3A	0.0685118	0.0296271	0.247116	0.0187076
H2AFZ	HIST1H2BJ	0.0538599	NA	0.0806972	0.00435942
H2AFZ	RUVBL2	0.0521401	NA	0.147552	0.00789062
HCRT	AGT	0.239941	NA	0.185154	0.0493623
HDAC4	H2AFY	0.154164	NA	0.222356	0.0380459
HDAC4	H2AFZ	0.274563	NA	0.157399	0.046872
HDAC4	RAN	0.0439188	-0.334054	0.362942	0.0176522
HDAC4	YWHAB	0.207193	0.110209	0.157148	0.0328888
HDAC4	YWHAZ	0.319657	NA	0.336186	0.111247
HDAC7	H2AFY	0.0844215	NA	0.133484	0.0124518
HDAC7	H2AFZ	0.150013	NA	0.0942757	0.0153058
HDAC7	YWHAQ	0.225892	0.154128	0.185886	0.0438313
HEBP1	ANXA1	0.0945357	NA	0.0554292	0.00582226
HEBP1	CCR4	0.0258431	NA	0.0647712	0.00185988
HEBP1	CXCR4	0.164846	NA	0.0873477	0.0159988
HEBP1	HTR1E	0.0198253	NA	0.0890604	0.00196184
HEBP1	MTNR1B	0.482092	NA	0.137172	0.0734771
HIC1	TFDP1	0.0365872	0.0210087	0.109615	0.0044561
HIST1H2BJ	H2AFY	0.0298602	NA	0.112562	0.00349389
HMGB1	ACTB	0.40581	0.355068	0.195807	0.0848937
HMGB1	DFFB	0.0888424	0.0777337	0.0527824	0.00513616
HMGB1	GTF3A	0.202947	0.177571	0.123382	0.0273361
HMGB1	IRF2	0.393581	0.344368	0.165937	0.0689648
HMGB1	TIRAP	0.0528679	0.0462573	0.0331012	0.00190631
HMGB1	TLE1	0.142981	0.125103	0.189617	0.0301242
HMGXB4	SMARCA1	0.0458592	-0.027062	0.0754596	0.00384502
HNRNPD	NCBP1	0.211532	0.076887	0.194677	0.0438558
HNRNPK	WDR1	0.076027	0.011288	0.16068	0.0134537
HNRNPU	HNRNPD	0.218585	0.0794503	0.26829	0.0595372
HNRNPU	HNRNPK	0.102882	0.0152753	0.180602	0.0189212
HNRNPU	NCBP2	0.11149	NA	0.198296	0.0242678
HNRNPU	NFX1	0.114763	0.00467181	0.0717437	0.00874974
HNRNPU	POLR2L	0.0259561	NA	0.0738558	0.00213001
HNRNPU	SRSF7	0.119878	NA	0.352533	0.0438848
HNRNPU	U2AF1	0.267522	0.188577	0.317836	0.0876579
HSPE1	CCT4	0.194747	0.126951	0.121679	0.0237679
HTATSF1	CRNKL1	0.142444	0.0791723	0.216139	0.032037
HTR1E	AGT	0.0128585	NA	0.210553	0.00300821
HTR1E	GNAI1	0.0164976	0.0119672	0.245862	0.00449184
HTRA2	TIMM9	0.209433	-0.0349592	0.0489399	0.0108005
HTRA2	XIAP	0.212172	0.0630226	0.112477	0.0238885
ICMT	RHOA	0.166979	0.0313757	0.199719	0.0351042
ICMT	ZMPSTE24	0.119876	0.0264452	0.103354	0.0125022
IMPAD1	IMPA1	0.055599	0.0122789	0.0920068	0.00545943
IMPAD1	IMPA2	0.0266188	NA	0.163628	0.00463855
IMPAD1	PAPSS1	0.0815568	0.0621587	0.154075	0.0127832
IMPAD1	PAPSS2	0.024815	NA	0.112842	0.00283704
IMPAD1	PLCG2	0.073323	NA	0.103425	0.00841668
ING3	ACTL6A	0.142676	0.0581864	0.104135	0.0150533
INPP4A	IMPAD1	0.120267	0.0847463	0.0950121	0.0126964
INPP4A	PIK3C2A	0.14293	0.100716	0.0917035	0.014467
INPP4A	PIP5K1A	0.133898	0.0943514	0.112531	0.0167417
INPP5A	IPMK	0.154321	NA	0.215113	0.0364394
INPP5A	ITPR3	0.120713	NA	0.182251	0.0242827
IPO7	RAN	0.0446496	-0.339612	0.419536	0.0191144
IPPK	IPMK	0.12695	NA	0.211008	0.0279037
IRF1	ATF2	0.19038	0.130195	0.17021	0.0348811
IRF1	GTF2A1	0.126794	0.0834926	0.246832	0.0347742
IRF1	HMGB1	0.146169	0.127892	0.157523	0.0247847
IRF2	GTF2A1	0.33492	0.220542	0.255074	0.0949217
IRS1	ARHGEF7	0.0837112	0.0499812	0.118166	0.0108821
IRS1	FES	0.0143817	NA	0.129239	0.00200504
IRS1	FOXO1	0.0290863	-0.00604135	0.100681	0.00305046
IRS1	GRB10	0.0239156	-0.0738382	0.165199	0.00428041
IRS1	PRKD1	0.0320274	-0.10284	0.0847564	0.0029667
IRS1	RHOA	0.0481655	0.00905039	0.188005	0.00966422
IRS1	YWHAZ	0.128549	NA	0.174954	0.0234517
IRS2	FOXO1	0.0627164	-0.0130264	0.216536	0.0142651
IRS2	RHOA	0.10171	0.0191115	0.395995	0.0442601
ITGB1	ARHGEF7	0.126346	0.0754373	0.11651	0.0163199
ITGB1	MLC1	0.10194	0.0137523	0.188417	0.0213414
ITGB1	PRKACB	0.31536	0.224199	0.12678	0.0441782
ITGB1	RAC1	0.0189826	-0.0734666	0.0893618	0.00181231
ITGB1	RHOA	0.0735738	0.0138246	0.187605	0.0146683
ITGB1	SAT1	0.163203	NA	0.108389	0.0196548
ITGB1	SCAI	0.0894353	-0.00612522	0.0360622	0.00357169
ITGB1	SDC2	0.151181	NA	0.105797	0.0174995
ITGB1	YWHAZ	0.185332	NA	0.164776	0.0335955
ITGB2	HMGB1	0.029442	0.0257606	0.133936	0.00428157
ITGB2	RHOA	0.00902591	0.00169599	0.291563	0.00281457
ITGB3	CD47	0.166103	0.0608483	0.167455	0.0298443
ITGB3	HMGB1	0.299718	0.262242	0.181768	0.0592166
ITGB3	RHOA	0.0925737	0.0173948	0.398661	0.0392195
ITGB3	VAV3	0.0695785	NA	0.0475901	0.00357973
ITPKA	CALM1	0.0242694	-0.00615001	0.024474	0.000651996
ITPKA	IPMK	0.0480075	-0.0121654	0.035842	0.00179988
ITPKA	ITPR3	0.0369699	-0.00936841	0.0298954	0.0011808
KALRN	ADRA1D	0.0169471	-0.036393	0.079695	0.00150066
KALRN	ANXA1	0.0223416	-0.0479775	0.0811513	0.00201227
KALRN	ARHGAP20	0.0769069	-0.165154	0.122867	0.0104876
KALRN	ARHGAP26	0.0113067	-0.0242806	0.079695	0.00100121
KALRN	ARHGAP45	0.0108777	-0.0233594	0.109296	0.00132099
KALRN	EDN1	0.0170492	-0.0366122	0.102227	0.00191948
KALRN	FGD3	0.0482418	-0.103597	0.100516	0.00535807
KALRN	FGD4	0.0458355	-0.0984294	0.114002	0.00571702
KALRN	GRM1	0.0203006	-0.0435945	0.0502053	0.00112993
KALRN	HCRT	0.0873317	-0.18754	0.114533	0.0111137
KALRN	HTR2A	0.061425	-0.131907	0.138981	0.00937094
KALRN	MCF2	0.0398392	-0.0855527	0.0781441	0.00337657
KALRN	MYO9A	0.011211	-0.0240751	0.0881199	0.00109768
KALRN	NGEF	0.0957883	-0.2057	0.142892	0.0146861
KALRN	NTS	0.0238768	-0.0512741	0.149578	0.0039507
KALRN	P2RY1	0.0249093	-0.0534914	0.105653	0.00292415
KALRN	P2RY2	0.0121828	-0.0261619	0.0601128	0.000813713
KALRN	PLEKHG5	0.0535258	-0.114944	0.110971	0.00652726
KALRN	RAC2	0.0292049	-0.062716	0.17544	0.00520174
KALRN	RHOBTB2	0.0839106	-0.180194	0.160213	0.0143935
KALRN	STARD13	0.0394616	-0.0847418	0.0871028	0.00379384
KALRN	STARD8	0.0487917	-0.104778	0.0765072	0.00414769
KALRN	TAC1	0.0317031	-0.0680807	0.127339	0.00447565
KALRN	VAV2	0.0104316	-0.0224014	0.0397412	0.000448664
KCNJ4	LIN7A	0.0913827	0.0594831	0.207578	0.0199255
KCNJ8	ABCC8	0.0165039	NA	0.0781661	0.00129523
KCTD10	USP13	0.0899551	NA	0.138936	0.012753
KITLG	DOK1	0.0347613	-0.0249829	0.0482882	0.00184457
KITLG	GRB10	0.026377	-0.0814377	0.311745	0.00906603
KLF5	NR2F2	0.0134755	-0.0693815	0.0602472	0.000886309
KMT5B	NCOA2	0.304156	NA	0.0635463	0.021193
KRIT1	PDCD10	0.134963	0.0350747	0.292878	0.0400485
LAP3	ANPEP	0.00710964	NA	0.075411	0.000547087
LAP3	GGCT	0.00251715	NA	0.0174324	4.85935e-05
LAP3	P4HA1	0.0091394	NA	0.088209	0.000895752
LFNG	SEL1L	0.349692	NA	0.133848	0.0520062
LIN54	TFDP1	0.0443962	0.0254927	0.142288	0.00651244
LIN7C	UIMC1	0.324244	0.262491	0.203098	0.06796
LPIN1	CNEP1R1	0.0579964	0.0126342	0.112882	0.00727414
LSM8	LSM6	0.00728656	NA	0.0823506	0.000600653
LSM8	USP4	0.0486854	NA	0.197028	0.00987885
MAML3	CCNC	0.0197202	-0.0269259	0.352183	0.0077168
MAPK12	CTNNA1	0.00471982	NA	0.0164724	8.59083e-05
MAPK12	CTNNB1	0.011797	NA	0.0563415	0.00072246
MAPK12	DUSP5	0.0392108	NA	0.05409	0.00233067
MAPK12	DUSP6	0.0201378	NA	0.0365374	0.000771262
MAPK12	FOS	0.0335421	NA	0.0612714	0.00212092
MAPK12	FOSL2	0.0392801	NA	0.0563578	0.00239065
MAPK12	FOXO3	0.022937	NA	0.0369252	0.000917609
MAPK12	MEF2A	0.0309656	NA	0.0545707	0.00171729
MAPK12	PTPRR	0.0166381	NA	0.0504696	0.000899056
MDFIC	CTNNB1	0.0127772	-0.0932114	0.17927	0.00254225
MED17	CDK19	0.249582	0.184234	0.236579	0.0608094
MED17	CHD9	0.232945	0.171954	0.184538	0.0475523
MED17	MED20	0.0563391	0.0415879	0.261709	0.0149387
MED17	NCOA2	0.295961	0.21847	0.222375	0.0718496
MED17	NCOA6	0.0224612	0.0165802	0.24993	0.00618251
MED17	SMARCD3	0.245599	0.181295	0.273638	0.0732085
MED17	TBL1XR1	0.0806908	0.0595637	0.204624	0.0178888
MED20	CCNC	0.0163553	-0.0223315	0.402108	0.00717187
MED20	CDK8	0.0409512	-0.0111302	0.262837	0.0108832
MED20	MED23	0.0139149	-0.00929498	0.250067	0.00379049
MED20	WNT1	0.0790226	0.0539789	0.239728	0.0210488
MED23	CDK19	0.0660034	-0.0440893	0.242045	0.016521
MED23	CHD9	0.0619954	-0.041412	0.190002	0.0130014
MED23	NCOA2	0.077906	-0.0520401	0.226458	0.01943
MED23	TBL1XR1	0.0208935	-0.0139565	0.20498	0.00475859
MED28	CDK19	0.0361808	NA	0.279995	0.0101406
MED28	MED20	0.00803483	NA	0.304715	0.00245079
MEF2A	PPP3CB	0.153405	0.043884	0.0953059	0.0151664
MFN1	DNM1L	0.045703	-0.0175492	0.169463	0.00859596
MFN1	2017-03-05	0.139897	0.0570781	0.116424	0.0168957
MFN1	PARK2	0.0863405	-0.0147114	0.176137	0.0153304
MID1	MID1IP1	0.0216278	0.00431905	0.10489	0.00242884
MID1	UBE2D1	0.0280856	NA	0.23968	0.00701936
MITF	MARK3	0.0833581	0.0159297	0.0347542	0.00313533
MKL1	SCAI	0.0445883	-0.00305375	0.0669604	0.00324174
MLC1	MYLK	0.0343887	0.0046392	0.196292	0.00706089
MLC1	TLN1	0.205924	0.0277802	0.41186	0.0942355
MLH1	WRN	0.0322335	NA	0.0702424	0.00235359
MNAT1	ACVR1	0.0370967	0.0224226	0.147312	0.00607198
MNAT1	CCNE2	0.145504	0.0879475	0.174933	0.0282815
MNAT1	MTA1	0.185699	0.112243	0.200294	0.0373813
MNAT1	NCBP1	0.150021	0.0906781	0.131571	0.0219316
MNAT1	RBBP7	0.0276143	0.0166911	0.157882	0.00483886
MNAT1	TAF5	0.0266802	0.0161264	0.081972	0.00243003
MOB4	SIKE1	0.213167	NA	0.202317	0.0431706
MOB4	STK24	0.0563182	NA	0.116415	0.00656287
MRPL24	MRPL19	0.0461297	-0.0338807	0.0594605	0.00276501
MRPL33	MRPL24	0.0259305	NA	0.104288	0.00275382
MRPL39	MRPL24	0.00591446	-0.0126305	0.104401	0.000658989
MRPS11	MRPL24	0.0284836	0.0199668	0.0578592	0.00168167
MRPS11	MRPS15	0.0351252	0.0246226	0.0896818	0.00338719
MRPS11	MRPS18A	0.0755091	0.0529315	0.224101	0.0179065
MRPS11	RPL17	0.0437283	0.0306533	0.185501	0.00821847
MRPS11	RPS2	0.0309427	0.0216907	0.213877	0.00665788
MRPS11	RPS6	0.0587754	0.0412012	0.166863	0.010873
MRPS11	RPS7	0.0256803	0.0180017	0.137573	0.00391676
MRPS18C	MRPS15	0.0326994	0.0186606	0.138572	0.00489333
MRPS18C	MRPS18A	0.0729886	0.0416525	0.359543	0.0268603
MRPS18C	RPS2	0.0268928	0.015347	0.308527	0.00897963
MRPS25	MRPS9	0.0134719	NA	0.0586932	0.000861337
MRPS5	MRPS11	0.0292602	0.0205112	0.198427	0.00583518
MRPS5	MRPS18C	0.0257624	0.0147019	0.289975	0.00797274
MRPS5	RPS27L	0.00676384	NA	0.222038	0.00160795
MRPS5	RPS8	0.0682799	NA	0.243497	0.0184323
MRPS5	ZMPSTE24	0.0188926	0.0041678	0.176161	0.00364129
MRPS9	MRPS15	0.0198025	NA	0.0862408	0.00172329
MRPS9	MRPS18A	0.0408794	NA	0.206946	0.00874852
MRPS9	MRPS5	0.0154962	NA	0.179248	0.00278881
MRPS9	RPL17	0.0220335	NA	0.159432	0.00373706
MRPS9	RPL8	0.0257604	NA	0.129784	0.00353041
MRPS9	RPS2	0.0159261	NA	0.187768	0.00309246
MRPS9	RPS6	0.0311995	NA	0.151084	0.00520857
MRPS9	RPS7	0.0138577	NA	0.126629	0.00190738
MTA1	ERCC6	0.0721882	0.0364453	0.154818	0.0124178
MTNR1B	AGT	0.312679	NA	0.324296	0.112667
MTNR1B	GNAI1	0.416278	0.301964	0.392937	0.174569
MTNR1B	SSTR1	0.205677	0.116461	0.269689	0.0614273
MYH9	RHOA	0.0853447	0.0160364	0.335328	0.0295036
MYO5A	EXOC5	0.0107106	-0.0189754	0.0305173	0.000349209
MYO9A	ARHGEF7	0.0318959	0.019044	0.145158	0.0051103
MYO9A	RHOA	0.0190811	0.00358538	0.240122	0.00471862
MYO9A	VAV3	0.0135227	NA	0.0270281	0.000406102
MZT1	CENPJ	0.00903722	-0.0141609	0.0234655	0.000235626
MZT1	TUBGCP4	0.0550645	-0.0862834	0.0361066	0.00199218
NAMPT	ARNTL	0.023464	0.0156406	0.251172	0.00621022
NCBP1	EIF4E	0.0845909	-0.0545506	0.138382	0.0117293
NCBP1	HNRNPK	0.0963571	0.0143065	0.126829	0.0134888
NCBP1	NFX1	0.111425	0.00453593	0.0522297	0.00646632
NCBP1	PLRG1	0.0866775	-0.0293154	0.188205	0.0173176
NCBP1	RPS8	0.180332	NA	0.177613	0.0354698
NCBP2	DDX20	0.0715197	NA	0.0444387	0.00347729
NCBP2	ETF1	0.17592	NA	0.239224	0.0464507
NCBP2	NCBP1	0.124111	NA	0.165516	0.020563
NCBP2	RPL17	0.0640659	NA	0.193515	0.0137295
NCBP2	RPL22	0.0833148	NA	0.158729	0.0146451
NCBP2	RPS2	0.0450146	NA	0.221546	0.0110441
NCBP2	RPS6	0.0943303	NA	0.190686	0.0198976
NCBP2	RPS7	0.0411694	NA	0.157041	0.00715978
NCK2	ACTR2	0.0857778	-0.0542612	0.0951487	0.00897871
NCK2	ACTR3	0.239656	0.160216	0.0998374	0.02559
NCK2	ARHGEF7	0.166452	0.0993831	0.198165	0.0362473
NCK2	ARPC5	0.239067	0.182896	0.219458	0.0578447
NCK2	DOK1	0.0622594	-0.0447457	0.0426312	0.00288186
NCK2	EFNB2	0.0905737	-0.140717	0.252293	0.0230586
NCK2	RAC1	0.0250003	-0.096756	0.151942	0.00402394
NCKAP1	VAV2	0.0274219	0.017608	0.04687	0.00142649
NCOA2	CCNC	0.0931832	-0.127232	0.370564	0.037411
NCOA2	GTF2A1	0.456809	0.300805	0.24309	0.121761
NCOA6	AGT	0.0206324	NA	0.234902	0.00529104
NCOA6	CCNC	0.00695642	-0.00949828	0.409682	0.00316658
NCOA6	CDK8	0.0161498	-0.0043894	0.248292	0.00445541
NCOA6	MED23	0.00631272	-0.0042168	0.271749	0.00178509
NCOA6	TEAD1	0.00370141	NA	0.041139	0.000168257
NDEL1	NSL1	0.162722	0.128478	0.220075	0.0397902
NFKB1	CFLAR	0.010159	-0.0527807	0.0213402	0.000222812
NFKB1	DDX3X	0.0530075	-0.0446204	0.0117756	0.000692013
NFKB1	HMGB1	0.164701	0.144107	0.021764	0.00366143
NFKB1	MTPN	0.138153	0.130201	0.0187723	0.00278267
NFKB1	PRKACB	0.20921	0.148733	0.0309497	0.00700756
NFKB1	PRKCI	0.0799079	0.067568	0.038305	0.00338592
NFKB1	PSEN2	0.156385	0.016759	0.0298146	0.00505152
NFKB1	RAC1	0.0130984	-0.0506934	0.0226906	0.000299005
NFKB1	RAN	0.0175241	-0.133292	0.0450509	0.000877199
NFKB1	TDP2	0.111608	0.0816462	0.0306509	0.00377999
NFKB1	UBE2D1	0.0667203	NA	0.0467892	0.00338956
NFKB1	UBE2N	0.135057	0.11874	0.0553231	0.00799977
NFYB	CHD9	0.223362	0.131405	0.0568974	0.0138138
NFYB	CNTN2	0.0304637	0.0179219	0.0706927	0.00232566
NFYB	ING2	0.174822	0.102848	0.0733019	0.0140205
NFYB	NCOA2	0.280372	0.164944	0.0677386	0.0206211
NFYB	NCOA6	0.0210227	0.0123677	0.0752187	0.00175311
NFYB	PDGFRB	0.0190975	0.0112351	0.0184168	0.000386075
NFYB	SMARCD3	0.228375	0.134354	0.0818181	0.0206239
NFYB	TBL1XR1	0.0741311	0.0436116	0.0604485	0.00497902
NGEF	ARHGAP10	0.169016	NA	0.135805	0.0255035
NGEF	ARHGAP18	0.0789886	-0.160212	0.087264	0.00765874
NGEF	CHN1	0.0319836	-0.00943563	0.0388779	0.00136643
NGEF	DLC1	0.0962299	NA	0.139622	0.0149287
NGEF	EPHA5	0.197846	-0.033425	0.143695	0.0311727
NGEF	RAC1	0.0410885	-0.159021	0.181171	0.00761929
NGEF	RHOA	0.158569	0.0297954	0.378715	0.0614032
NHEJ1	XRCC6	0.131099	NA	0.14902	0.0200167
NIFK	DDX54	0.180264	NA	0.202666	0.0370146
NIFK	NOC2L	0.120213	NA	0.21296	0.0257811
NIFK	NOP2	0.0720191	NA	0.17848	0.0128669
NIFK	NOP56	0.176261	NA	0.190705	0.0357595
NIFK	PES1	0.0236469	NA	0.000559354	1.32801e-05
NIFK	RPS2	0.0531996	NA	0.211836	0.0122495
NIFK	RPS6	0.1162	NA	0.190045	0.0230035
NIFK	RRS1	0.02775	NA	0.0897661	0.0024935
NMI	CCNE1	0.00822933	-0.0022704	0.137176	0.0012543
NOC2L	PWP1	0.113407	NA	0.0477174	0.00597294
NOC2L	RPF1	0.164121	0.149941	0.261462	0.0435206
NOP2	PWP1	0.0678315	NA	0.039927	0.00297616
NOP56	PWP1	0.184381	NA	0.0473822	0.00918654
NOS2	RAC1	0.0139747	-0.0540849	0.128346	0.00186445
NR2C2	MAP3K7	0.0557696	0.0249855	0.0690578	0.00417714
NR2C2	NR4A1	0.108125	0.0484414	0.0909738	0.0106341
NR2C2	RARB	0.0882537	0.0395388	0.14238	0.0139617
NR2C2	TGFB2	0.112568	0.0504322	0.16191	0.0202511
NR2C2	WDR34	0.180501	0.0808667	0.0519939	0.0102344
NR3C1	ATF2	0.218285	0.149278	0.192331	0.0463899
NR3C1	BAG1	0.0272776	-0.00872728	0.245955	0.00689524
NR3C1	BRF1	0.0477919	NA	0.361955	0.0191779
NR3C1	GTF2A1	0.149565	0.0984875	0.286944	0.0475797
NR3C1	HMGB1	0.177409	0.155226	0.188419	0.0348927
NR3C1	PER2	0.101357	NA	0.0504678	0.005646
NR3C1	PRKACB	0.22431	0.159469	0.266706	0.066472
NR4A1	NR0B1	0.141777	NA	0.122957	0.0187245
NRP2	NR2F2	0.0198842	-0.102378	0.12007	0.00250262
NSL1	CKAP5	0.477723	0.377187	0.276991	0.147028
NSL1	CLASP2	0.341111	0.269325	0.194937	0.0738836
NSL1	INCENP	0.331936	0.262081	0.259837	0.0907889
NTS	AGT	0.0669793	NA	0.24689	0.017916
NUP107	BUB1	0.0121461	-0.210449	0.0143945	0.000191498
NUP107	EIF4E	0.0620175	-0.0399936	0.0963414	0.00663873
NUP107	NCBP2	0.0909008	NA	0.115117	0.0116269
NUP107	NFX1	0.090586	0.00368761	0.0403218	0.00405843
NUP107	NSL1	0.251343	0.198448	0.164013	0.0453006
NUP107	NUP210	0.0465415	-0.256658	0.0440154	0.00210107
NUP107	NUP54	0.113994	-0.129879	0.101406	0.0116178
NUP107	PNPT1	0.0784848	0.0410362	0.114645	0.00993147
NUP107	RAN	0.0227144	-0.17277	0.211123	0.00521255
NUP107	SRSF7	0.0924621	NA	0.193606	0.0198903
NUP107	U2AF1	0.204851	0.1444	0.173291	0.0394432
NUP210	DDX20	0.0332838	-0.183547	0.015444	0.000571149
NUP210	HDAC4	0.0846305	-0.466704	0.0711612	0.00669156
NUP210	NCBP1	0.054371	-0.299835	0.0541488	0.0031794
NUP210	RANBP2	0.0552978	-0.304946	0.045081	0.00256206
NUP54	DDX20	0.0798829	-0.0910149	0.034866	0.00309466
NUP54	NCBP1	0.127816	-0.145628	0.119737	0.0168735
NUP54	NUP62CL	0.135722	-0.154636	0.114639	0.016623
NUP54	RANBP2	0.134355	-0.153078	0.103029	0.0140532
NVL	NIFK	0.0204602	NA	0.0941013	0.00210419
ODC1	ARG2	0.103616	-0.0126385	0.233469	0.0252252
ODC1	OAT	0.111955	0.0585545	0.190043	0.0221168
ODC1	PSMC6	0.0053427	-0.224646	0.0837081	0.000495269
ODC1	PSMD14	0.0796984	-0.0139749	0.27054	0.0239573
ODC1	SAT1	0.178075	NA	0.163799	0.0309316
OGG1	POLH	0.107743	NA	0.187044	0.0206695
ORC3	CCNE1	0.00575251	-0.00158707	0.0991116	0.00063349
ORC3	E2F3	0.014915	NA	0.096876	0.00160545
P2RY1	AGT	0.0684373	NA	0.170798	0.0129878
P2RY2	AGT	0.0334718	NA	0.0971784	0.00361415
PAPOLA	CCAR1	0.09967	0.0585966	0.126898	0.0140533
PAPOLA	DNAJC8	0.0959064	0.0563839	0.124888	0.0133084
PAPOLA	HNRNPU	0.218261	0.128317	0.16802	0.0405219
PAPOLA	NCBP1	0.221567	0.13026	0.127892	0.0313111
PARD6G	RAC1	0.00612188	-0.0236929	0.0482997	0.00029598
PARK2	UBE2J1	0.166661	-0.0283971	0.309377	0.052667
PDCD6IP	ALG2	0.0456001	0.0419454	0.0816631	0.00379211
PDE3B	YWHAB	0.0511249	0.027194	0.132169	0.00711275
PDE7B	GNAI1	0.300584	0.218041	0.248087	0.0821268
PDGFB	ACTR2	0.0960396	-0.0607526	0.0857889	0.00915459
PDGFB	ARPC5	0.268258	0.205228	0.198306	0.0591079
PDGFB	GRB10	0.052436	-0.161894	0.246	0.0143166
PDGFB	RAC1	0.0275822	-0.106749	0.134995	0.00404283
PDGFRB	ACTR2	0.00973003	-0.00615502	0.0273744	0.000294314
PDGFRB	ACTR3	0.0264289	0.0176684	0.0279247	0.000815492
PDGFRB	ARPC5	0.0270278	0.0206774	0.062928	0.00188978
PDGFRB	GRB10	0.0057639	-0.0177958	0.0851671	0.000499384
PDGFRB	RAB5A	0.0215882	0.018875	0.0593332	0.00138475
PDGFRB	RAC1	0.00286348	-0.0110822	0.0441399	0.000133186
PER2	ARNTL	0.0365664	NA	0.0559576	0.00205233
PER2	FBXL3	0.131305	NA	0.0388502	0.00534159
PER2	NONO	0.0709579	NA	0.0463956	0.00355138
PES1	NAP1L4	0.0325968	0.021973	0.000328608	1.09525e-05
PES1	PWP1	0.0221917	NA	0.00012468	3.06068e-06
PES1	RPF1	0.0322845	0.0294951	0.000686762	2.24183e-05
PHC2	BARD1	0.122996	NA	0.182261	0.0248807
PHC2	BRCC3	0.293036	0.127076	0.245005	0.0797726
PHLPP1	PHLPP2	0.0684245	NA	0.102263	0.00700427
PHLPP1	PRKAR2B	0.109133	0.0860085	0.107086	0.0129134
PHLPP1	USP12	0.0240905	-0.00539519	0.0522252	0.00129571
PI4K2B	PIK3C2A	0.0849298	-0.115255	0.155223	0.0141147
PI4K2B	PIP5K1A	0.0784641	-0.10648	0.187846	0.0161084
PI4KB	PLCG2	0.0771103	NA	0.0795555	0.00681617
PI4KB	VSNL1	0.10964	-0.0664722	0.175615	0.0201616
PICALM	PPP3CB	0.098737	0.0282453	0.0247923	0.00271991
PIK3C2A	PLCG2	0.0874276	NA	0.100153	0.0096221
PIP5K1A	RHOA	0.0774689	0.0145565	0.323774	0.0270284
PKD1	ARF4	0.086504	0.0216701	0.279689	0.0256567
PKD1	NPHP1	0.187893	0.050686	0.221688	0.043344
PKD1	PRKD1	0.0319026	-0.102439	0.139993	0.00477152
PKN3	ARHGAP10	0.0365496	NA	0.121407	0.00449582
PKN3	RHOA	0.0316515	0.00594737	0.312509	0.00999129
PLAU	TFDP1	0.0335731	0.019278	0.119956	0.00447475
PLCG2	IPMK	0.0828695	NA	0.140735	0.0129585
PLCG2	ITK	0.0127508	NA	0.147795	0.00195895
PLCG2	ITPR3	0.0680047	NA	0.125089	0.00905925
PLCG2	PIP5K1A	0.0828113	NA	0.124262	0.0112585
PLCG2	PPP3CA	0.114606	NA	0.105327	0.0134124
PLCG2	VAV2	0.0177447	NA	0.0388589	0.000751133
PLEKHG5	CHN1	0.0182238	-0.00537629	0.0307868	0.000619263
PLEKHG5	RHOA	0.0888006	0.0166858	0.294754	0.0273504
PLK2	CDC14A	0.0501979	0.0433653	0.0826808	0.0045659
POLR2L	CTPS1	0.0190427	NA	0.0131724	0.000276558
POLR2L	GTF3A	0.0222485	NA	0.0573588	0.00141794
POLR2L	NCBP1	0.0263492	NA	0.0562167	0.00164585
POLR2L	TAF5	0.00474329	NA	0.0354525	0.00018459
POLR2L	ZNF143	0.025853	NA	0.0492372	0.00141437
POMP	PSME4	0.216924	0.160178	0.306572	0.068208
PPARD	NR2C2	0.104103	0.0466395	0.172247	0.0198576
PPM1B	MAP3K7	0.0896165	0.0850127	0.0512723	0.00473695
PPP1CA	CNEP1R1	0.3139	0.0683814	0.206467	0.0720112
PPP1CA	PPP2R5C	0.32233	0.231226	0.0926534	0.0331097
PPP1CA	PPP3CB	0.324931	0.0929516	0.0663284	0.0235029
PPP1CA	PRKACB	0.770404	0.547704	0.176414	0.14805
PPP3CA	CNEP1R1	0.195588	0.0426078	0.226728	0.0492726
PPP3CA	PPP2R5C	0.208856	0.149825	0.105806	0.023559
PPP3CB	PPP3CA	0.198928	0.0569067	0.0715664	0.0158009
PPP3R1	CALM1	0.0771991	0.0482532	0.132912	0.0111167
PPP3R1	PPP1CA	0.316689	0.197946	0.123949	0.0433738
PPP3R1	PPP3CA	0.217822	0.136149	0.15025	0.0327604
PPP3R1	PPP4R2	0.20671	0.129204	0.20304	0.0466337
PPP4R2	CNEP1R1	0.206027	0.0448819	0.340092	0.0778536
PPP4R2	PPP2R5C	0.212967	0.152774	0.153634	0.0360341
PPP4R2	PPP3CB	0.211872	0.0606093	0.108541	0.0252435
PRICKLE1	PSMC6	0.00180735	-0.075994	0.068598	0.000137756
PRICKLE1	PSMD14	0.0270506	-0.00474325	0.222444	0.00668582
PRKACB	EDN1	0.118814	0.0844683	0.179824	0.0237396
PRKAG2	STK11	0.0332722	-0.00905657	0.0683884	0.00236286
PRKAR2A	AGT	0.200496	NA	0.292639	0.0651924
PRKAR2A	MLC1	0.166773	0.0224985	0.4801	0.0889643
PRKAR2A	PHLPP2	0.21561	NA	0.213183	0.0505659
PRKAR2A	PRKACB	0.569513	0.404885	0.356598	0.203291
PRKAR2A	PRKAR2B	0.376263	0.296535	0.244257	0.102003
PRKAR2A	PRKCE	0.161624	0.012374	0.234779	0.0412457
PRKAR2A	RHOA	0.117424	0.0220642	0.466349	0.0596519
PRKAR2B	BCL2	0.0869909	0.068558	0.0130415	0.00125775
PRKAR2B	CENPJ	0.0273204	0.0215314	0.133808	0.00406189
PRKAR2B	CEP152	0.555714	0.437961	0.205623	0.126964
PRKAR2B	CEP192	0.191562	0.150971	0.201019	0.0427864
PRKAR2B	CEP63	0.141538	0.111547	0.0773388	0.0121626
PRKAR2B	CKAP5	0.363754	0.286677	0.17923	0.0724395
PRKAR2B	EDN1	0.0871319	0.0686691	0.136722	0.0132218
PRKAR2B	ITGB1	0.229736	0.181056	0.0957528	0.0244421
PRKAR2B	PLK4	0.240517	0.189553	0.146698	0.0392038
PRKAR2B	PPP1CA	0.566192	0.446219	0.134418	0.0826346
PRKAR2B	TLN1	0.464078	0.365743	0.209306	0.107927
PRKAR2B	TUBGCP4	0.150119	0.11831	0.185674	0.0309703
PRKCE	PPP1CA	0.232755	0.0178197	0.123649	0.0319777
PRKCI	CTNNA1	0.0221903	0.0187635	0.099241	0.00241999
PRKCI	CTNNB1	0.0550993	0.0465905	0.337207	0.0202175
PRKCI	LLGL1	0.0416987	0.0352593	0.00108309	4.57118e-05
PRKCI	LLGL2	0.111438	0.0942289	0.330717	0.0369653
PRKCI	PARD6G	0.0410241	0.0346889	0.0895645	0.00368167
PRKG2	GUCY1A3	0.0788199	NA	0.150191	0.012661
PROC	CTNNB1	0.0164043	NA	0.0021148	3.78319e-05
PROC	ITGB2	0.00456052	NA	0.00158537	7.94516e-06
PROC	SERPINC1	0.0111167	NA	0.00105569	1.18663e-05
PROC	SKIL	0.0134831	NA	0.000387274	5.77618e-06
PSEN1	BCL2	0.0885338	0.0770483	0.0173933	0.00161415
PSEN1	BDNF	0.104886	0.0912791	0.269022	0.0309392
PSEN1	CTNNB1	0.108145	0.0941153	0.277502	0.0300405
PSEN1	CTNND1	0.204324	0.177817	0.232982	0.0490255
PSEN1	FLNC	0.123902	0.107829	0.173839	0.0224833
PSMA2	PSMD1	0.015048	NA	0.0930002	0.00140368
PSMA2	PSME4	0.0434861	NA	0.308387	0.0136425
PSMA3	ANAPC4	0.0314284	-0.00131172	0.05076	0.00177256
PSMA3	CDC23	0.0626804	-0.00261609	0.0891261	0.00618656
PSMA3	CDCA8	0.0149549	-0.00062417	0.045225	0.000751482
PSMA3	CDKN1B	0.0381706	-0.00159312	0.081	0.00343535
PSMA3	INCENP	0.075174	-0.00313753	0.070065	0.0058523
PSMA3	KLHL9	0.133514	-0.00557248	0.0787644	0.0114555
PSMA3	OAZ1	0.00972424	-0.00040586	0.0191831	0.000205668
PSMA3	ODC1	0.0751099	-0.00313486	0.06075	0.00506992
PSMA3	PRICKLE1	0.0254932	-0.00106401	0.04995	0.00141487
PSMA3	PSMD1	0.0247319	-0.00103223	0.0317682	0.000786474
PSMA3	PSME4	0.0723437	-0.0030194	0.106629	0.00773715
PSMA3	RNF146	0.052315	-0.00218347	0.05967	0.00346848
PSMA3	SMURF1	0.0591931	-0.00247054	0.08856	0.0058246
PSMA3	STUB1	0.0887906	-0.00370585	0.0336528	0.00327637
PSMA3	TNKS2	0.0657744	-0.00274522	0.0458835	0.00333476
PSMA4	POMP	0.143121	0.105682	0.116191	0.0166627
PSMA4	PSMA2	0.0284861	NA	0.116044	0.00330894
PSMA4	PSMA3	0.0467241	-0.00195012	0.0395604	0.00185027
PSMA4	PSMC6	0.00331253	-0.139282	0.0543296	0.000180148
PSMA4	PSMD10	0.0697409	0.0609754	0.123674	0.00900328
PSMA4	PSMD14	0.0495785	-0.00869346	0.176176	0.00874327
PSMA4	RBX1	0.144914	NA	0.150962	0.0239874
PSMA4	SKP2	0.0308598	-0.0434599	0.0370656	0.00127093
PSMA4	UBE2D1	0.0601237	NA	0.16612	0.0108093
PSMC6	OAZ1	0.000684084	-0.0287638	0.0261414	1.98699e-05
PSMD1	PSMC6	0.00175338	-0.0737246	0.0436283	7.65736e-05
PSMD1	PSMD14	0.0262428	-0.0046016	0.141474	0.0037164
PSMD1	UBE2D1	0.0311357	NA	0.130512	0.00449512
PSMD10	ANAPC4	0.048918	0.0427697	0.165478	0.00899427
PSMD10	CDC23	0.0972374	0.0850159	0.289586	0.0312873
PSMD10	CDKN1B	0.0599403	0.0524066	0.266407	0.0175865
PSMD10	OAZ1	0.0150189	0.0131312	0.0620541	0.00103554
PSMD10	ODC1	0.116908	0.102214	0.198045	0.0257256
PSMD10	PRICKLE1	0.0397681	0.0347698	0.163199	0.00719525
PSMD10	PSMD1	0.038495	0.0336567	0.103564	0.0039907
PSMD10	PSME4	0.10752	0.0940061	0.331921	0.0374876
PSMD10	RNF146	0.0816088	0.0713516	0.194956	0.0176388
PSMD10	SMURF1	0.0926455	0.0810011	0.29031	0.0297192
PSMD10	TNKS2	0.101812	0.0890152	0.148754	0.0168276
PSMD14	OAZ1	0.0102955	-0.0018053	0.0852401	0.000969717
PSME4	PSMC6	0.00504139	-0.211976	0.14394	0.000740469
PSME4	PSMD14	0.0769171	-0.0134872	0.475808	0.0366344
PTP4A3	RAC1	0.011338	-0.0438802	0.145021	0.00182491
PTP4A3	RHOA	0.0437592	0.00822244	0.303175	0.0147081
PXN	ARHGEF7	0.114902	0.0686041	0.185555	0.0214062
PXN	ASAP2	0.139864	0.00574888	0.101581	0.0146018
PXN	EFNB2	0.0530317	-0.0823908	0.200376	0.0115503
PXN	GNAI1	0.12907	0.0936259	0.19278	0.0276467
PXN	MLC1	0.083957	0.0113262	0.271755	0.0253508
PXN	PRKACB	0.258292	0.183628	0.181845	0.052188
PXN	PRKAR2B	0.189629	0.149447	0.138412	0.0290985
PXN	RAC1	0.0164691	-0.0637385	0.135772	0.00226779
PXN	RAP1B	0.0809097	-0.0790881	0.207675	0.0182047
PXN	RHOA	0.0642651	0.0120755	0.286975	0.0184794
PXN	YWHAZ	0.154149	NA	0.240011	0.0403023
RAB14	EXOC5	0.0649814	-0.115124	0.0329129	0.00223016
RAB27A	MYO5A	0.0172326	NA	0.149276	0.0026796
RAB5A	CTNNA1	0.0256434	0.0224205	0.0738939	0.00207773
RAB5A	CTNNB1	0.0639485	0.0559114	0.252166	0.0174331
RAB5A	EPS8	0.0877027	0.0766802	0.123838	0.0113252
RAB5A	PDGFB	0.209404	0.183086	0.182733	0.0423285
RAB5A	RUFY1	0.261174	0.22835	0.229371	0.0635943
RAC1	ACTB	0.0333825	-0.129197	0.21116	0.00717097
RAC1	ASAP1	0.0441406	-0.170833	0.198992	0.00945492
RAC1	CTNND1	0.0167833	-0.0649549	0.164943	0.00286572
RAC1	CXCR4	0.0159768	-0.0618333	0.155014	0.00274267
RAC1	EDN1	0.00731448	-0.0283085	0.129634	0.000996012
RAC1	FGD4	0.0188787	-0.0730645	0.138789	0.00284801
RAC1	MCF2	0.0173805	-0.0672661	0.100767	0.00178168
RAC1	MYO5A	0.00304636	-0.01179	0.18342	0.00058448
RAC1	PIP5K1A	0.0202243	-0.078272	0.156049	0.00337899
RAC1	PLEKHG5	0.0233225	-0.0902627	0.14292	0.00343988
RAC1	RAB14	0.0170767	-0.0660901	0.182774	0.0034488
RAC1	RASGRF1	0.00318562	-0.012329	0.149916	0.000490324
RAC1	SLIT2	0.00644444	-0.0249413	0.097745	0.000674423
RAC1	VAV2	0.00458269	-0.0177359	0.0516038	0.000238392
RAC2	ARHGAP10	0.0491378	NA	0.158993	0.00861366
RAC2	ARHGAP18	0.0230402	-0.0467323	0.102502	0.00259525
RAC2	ARHGEF7	0.0798578	0.0476805	0.277758	0.023275
RAC2	CHN1	0.00968303	-0.00285664	0.0473986	0.000480588
RAC2	DLC1	0.0281618	NA	0.164545	0.00507544
RAC2	PLCG2	0.0459932	NA	0.158818	0.00806243
RAC2	PRKCI	0.0743034	0.062829	0.365083	0.0297119
RAC2	RAC1	0.0109313	-0.0423065	0.194097	0.00235487
RAC2	RHOA	0.0436398	0.00820001	0.419716	0.0196316
RAC2	VAV3	0.0339393	NA	0.0518442	0.00185412
RAD1	FAHD1	0.0707187	NA	0.278193	0.0204931
RAD18	POLH	0.0577412	NA	0.199488	0.0115302
RAD18	SIVA1	0.0331806	NA	0.209988	0.00749199
RAD18	UBE2N	0.100848	0.088664	0.354924	0.0366737
RAD18	WRN	0.034407	NA	0.165564	0.0062876
RAD18	WRNIP1	0.0664121	NA	0.204946	0.0137484
RAD51AP1	USP12	0.0556362	-0.01246	0.065964	0.00367366
RAD51C	XRCC3	0.0760555	NA	0.189986	0.0144639
RALBP1	ARHGEF7	0.0162682	0.00971323	0.0288065	0.000517252
RALBP1	ECT2	0.00422061	NA	0.0275844	0.000128361
RALBP1	KALRN	0.00571807	-0.0122793	0.0174874	0.000111104
RALBP1	RAC1	0.00258418	-0.0100013	0.0233598	6.07303e-05
RALBP1	RHOA	0.0095818	0.00180044	0.0469159	0.000470229
RALBP1	VAV3	0.00691244	NA	0.00537563	4.11959e-05
RANBP2	BUB1	0.0147302	-0.255222	0.0150484	0.000238351
RANBP2	EIF4E	0.0753958	-0.0486209	0.100964	0.00828321
RANBP2	NCBP2	0.11063	NA	0.120772	0.0145228
RANBP2	NFX1	0.10785	0.00439041	0.0413829	0.00495906
RANBP2	NSL1	0.296943	0.234452	0.167034	0.0549276
RANBP2	RAN	0.0293656	-0.22336	0.235285	0.00691622
RANBP2	SRSF7	0.110695	NA	0.199805	0.0244392
RANBP2	U2AF1	0.247144	0.174212	0.180223	0.0488388
RAP1B	BDNF	0.0449009	-0.04389	0.309043	0.015401
RAP1B	CBL	0.0243967	-0.0238474	0.15044	0.00403765
RAP1B	CTNNA1	0.0172849	-0.0168958	0.086976	0.00165935
RAP1B	CTNNB1	0.0427333	-0.0417712	0.294253	0.0138029
RAP1B	CTNND1	0.0884464	-0.0864551	0.27063	0.0246766
RAP1B	ITGB2	0.011827	-0.0115608	0.2196	0.0028858
RAP1B	ITGB3	0.12428	-0.121482	0.307632	0.0411987
RAP1B	KRIT1	0.087453	-0.085484	0.262944	0.0230876
RAP1B	NTRK2	0.0341771	-0.0334076	0.295733	0.011193
RAP1B	RAPGEF4	0.073989	-0.0723232	0.164362	0.0126151
RAP1B	TLN1	0.199525	-0.195033	0.316448	0.0680381
RAP1B	VAV2	0.0221596	-0.0216607	0.07769	0.00188357
RBBP7	GLI3	0.00532623	-0.0036479	0.215709	0.00125291
RBBP7	UBE3A	0.0213356	-0.00161456	0.114119	0.00269635
RBL2	CCNE1	0.0307654	-0.00848792	0.251688	0.00801584
RBL2	E2F3	0.0791898	NA	0.244229	0.0201673
RBL2	SKP2	0.0594637	-0.0837428	0.100442	0.00605745
RBL2	TFDP1	0.0675981	0.0388155	0.248849	0.0169062
RBX1	ANAPC4	0.114129	NA	0.226793	0.0269061
RBX1	BMI1	0.400432	NA	0.208249	0.092143
RBX1	CBX4	0.0973984	NA	0.300208	0.0324886
RBX1	CDC23	0.228748	NA	0.400189	0.0943735
RBX1	CDKN1B	0.138756	NA	0.362281	0.0522002
RBX1	CRBN	0.513591	NA	0.400014	0.21028
RBX1	DCAF12	0.295812	NA	0.376388	0.123711
RBX1	DCAF5	0.351603	NA	0.260707	0.10185
RBX1	FBXL3	0.216111	NA	0.272899	0.0653116
RBX1	FBXO31	0.284262	NA	0.339731	0.100701
RBX1	FBXO6	0.120187	NA	0.204216	0.0249433
RBX1	FBXW5	0.319574	NA	0.0626749	0.020438
RBX1	KLHL21	0.176978	NA	0.261835	0.0514879
RBX1	KLHL25	0.382765	NA	0.404819	0.171596
RBX1	KLHL9	0.451125	NA	0.327442	0.161793
RBX1	MAML3	0.114902	NA	0.304158	0.0388316
RBX1	NFKB1	0.164345	NA	0.0434532	0.0076871
RBX1	PHC2	0.376741	NA	0.303593	0.127085
RBX1	PSMD1	0.0756964	NA	0.119632	0.0100619
RBX1	PSME4	0.221865	NA	0.402346	0.0991849
RBX1	SNW1	0.208292	NA	0.24152	0.0558965
RCC1	RAN	0.0310364	-0.236068	0.220538	0.00685157
RCHY1	GORAB	0.0351892	0.0249809	0.112262	0.00413656
RCHY1	POLH	0.0227044	NA	0.104127	0.00245498
RGS3	YWHAZ	0.409276	NA	0.266128	0.116992
RHEB	EIF4E	0.0207886	-0.0134061	0.122207	0.00258972
RHEB	PRKAG2	0.00854601	-0.00232619	0.0483331	0.000448973
RHOA	MCF2	0.0675516	0.0126931	0.212138	0.0144604
RHOA	RASGRF1	0.0117896	0.00221529	0.300525	0.00378938
RHOA	RHOBTB2	0.128121	0.0240742	0.391651	0.0555074
RIN3	BIN1	0.102053	NA	0.145731	0.0152537
RNF146	PSMC6	0.0037295	-0.156815	0.0824021	0.000339578
RNF146	PSMD14	0.0555109	-0.0097337	0.26573	0.0163899
RPA3	ATR	0.0891701	NA	0.302366	0.0295636
RPA3	BRCA2	0.0806402	NA	0.413472	0.0360849
RPA3	CLSPN	0.0241424	NA	0.129794	0.00347013
RPA3	DBF4	0.0616521	NA	0.33465	0.0228229
RPA3	MCM4	0.0585654	NA	0.352592	0.0222758
RPA3	MLH1	0.0330851	NA	0.112535	0.004105
RPA3	MLH3	0.048458	NA	0.172944	0.00919926
RPA3	ORC3	0.0166747	NA	0.170099	0.0031203
RPA3	POLD3	0.0194348	NA	0.231919	0.00486223
RPA3	RAD1	0.0555551	NA	0.496703	0.0306604
RPA3	RAD51C	0.0424493	NA	0.411421	0.0193406
RPA3	RAD52	0.0120246	NA	0.278768	0.00339967
RPA3	SERPINH1	0.0637424	NA	0.177568	0.0125763
RPAP1	POLR2L	0.00923973	NA	0.0586278	0.000586261
RPF1	NOP2	0.0984272	0.0899231	0.21936	0.0217432
RPL18A	EIF1AX	0.0845956	0.0672141	0.123378	0.0113202
RPL18A	EIF4E	0.026205	-0.016899	0.112625	0.00319064
RPL18A	NCBP2	0.0374959	NA	0.131374	0.00545513
RPL18A	NIFK	0.0465294	NA	0.131897	0.00635308
RPL18A	RPS12	0.0320325	NA	0.119692	0.00383787
RPL18A	RPS27L	0.00623863	NA	0.148601	0.00094889
RPL18A	RPS8	0.0666807	NA	0.172543	0.0115168
RPL18A	SRP9	0.077587	NA	0.200271	0.0171128
RPL18A	SSR1	0.0225386	-0.0423089	0.201374	0.00497117
RPL18A	TRAM1	0.0285814	0.0153186	0.0640683	0.00203462
RPL19	EIF1AX	0.363761	0.28902	0.206345	0.0822128
RPL19	EIF4E	0.112685	-0.0726678	0.188367	0.0231727
RPL19	NCBP2	0.162281	NA	0.221146	0.0398752
RPL19	NIFK	0.200584	NA	0.221152	0.0462561
RPL19	RPS12	0.139097	NA	0.202154	0.0281471
RPL19	RPS27L	0.0276173	NA	0.255859	0.00709454
RPL19	RPS8	0.289553	NA	0.291416	0.0844649
RPL19	SRP9	0.334315	NA	0.33564	0.124539
RPL19	SSR1	0.0964774	-0.181106	0.335267	0.0359397
RPL19	TRAM1	0.124111	0.0665193	0.108208	0.014922
RPL22	EIF1AX	0.18858	0.149834	0.149554	0.0304897
RPL22	EIF4E	0.0574714	-0.0370619	0.134311	0.00845461
RPL22	RPS8	0.148014	NA	0.208263	0.0308876
RPL37	EIF1AX	0.0827805	0.0657719	0.159626	0.0139535
RPL37	EIF4E	0.0245879	-0.0158562	0.13972	0.00377105
RPL37	NCBP2	0.0359206	NA	0.1664	0.0065828
RPL37	RPS27L	0.00551777	NA	0.173772	0.00105715
RPL37	RPS8	0.0628279	NA	0.214949	0.0136688
RPL37	SRP9	0.0732667	NA	0.250047	0.0203557
RPL7A	RPS8	0.102748	NA	0.182417	0.0189323
RPL8	EIF1AX	0.173016	0.137467	0.151468	0.0275567
RPL8	EIF4E	0.0508371	-0.0327836	0.131152	0.00736727
RPL8	MRPS11	0.050644	0.0355012	0.149586	0.007691
RPL8	NCBP2	0.0741017	NA	0.155846	0.0128316
RPL8	RPS27L	0.0122563	NA	0.17524	0.0022188
RPL8	RPS8	0.132218	NA	0.205366	0.0271803
RPL8	SRP9	0.153166	NA	0.237319	0.0402092
RPS12	EIF3I	0.084799	NA	0.159311	0.0146523
RPS12	ETF1	0.136445	NA	0.197878	0.0296697
RPS12	NCBP1	0.0868208	NA	0.123482	0.0118462
RPS12	RPL17	0.054731	NA	0.176308	0.00965915
RPS12	RPL22	0.0700352	NA	0.142299	0.0101383
RPS12	RPL37	0.0303038	NA	0.149713	0.00457345
RPS12	RPL8	0.0633248	NA	0.142034	0.00903037
RPS12	RPS2	0.0384556	NA	0.201846	0.00776989
RPS12	RPS6	0.0804964	NA	0.173538	0.0139832
RPS12	RPS7	0.0351707	NA	0.143077	0.00503715
RPS12	SEC11A	0.0582314	NA	0.199584	0.0129134
RPS12	SSR2	0.0592269	NA	0.111528	0.00731499
RPS2	EIF1AX	0.108829	0.0864682	0.222956	0.0245587
RPS2	EIF4E	0.0311196	-0.0200683	0.187875	0.00638972
RPS2	RPS8	0.0800516	NA	0.290973	0.0233161
RPS27L	MRPS15	0.0085941	NA	0.106217	0.000987927
RPS27L	RPL17	0.0108667	NA	0.223147	0.00243461
RPS27L	RPL22	0.0139188	NA	0.180278	0.00255786
RPS27L	RPS2	0.0076506	NA	0.255983	0.00196235
RPS27L	RPS6	0.0160305	NA	0.220303	0.00353511
RPS27L	RPS7	0.00699007	NA	0.18127	0.0012709
RPS6	DDX3X	0.0727511	-0.06124	0.0932715	0.00718053
RPS6	EIF4E	0.0709781	-0.045772	0.176002	0.0125299
RPS6	RPS8	0.167566	NA	0.250166	0.0419613
RPS6KB1	CREM	0.0130769	-0.125483	0.184671	0.00257728
RPS6KB1	CTCF	0.0213722	-0.205082	0.148945	0.0034714
RPS6KB1	DDIT4	0.00856081	-0.0821473	0.142816	0.00134501
RPS6KB1	FOXO3	0.0134102	-0.128681	0.104417	0.00143175
RPS6KB1	IRS1	0.0105442	-0.10118	0.0793626	0.000837652
RPS6KB1	ITGB1	0.0145771	-0.139878	0.0716739	0.00115066
RPS6KB1	KITLG	0.0108039	-0.103672	0.139134	0.00164824
RPS6KB1	MITF	0.0133423	-0.128029	0.134653	0.00194435
RPS6KB1	NCBP1	0.0157164	-0.150811	0.108268	0.00176148
RPS6KB1	PDCD4	0.0239305	-0.229631	0.172438	0.00414727
RPS6KB1	PHLPP1	0.00733387	-0.070374	0.0848939	0.000643848
RPS6KB1	PXN	0.0124287	-0.119262	0.107019	0.001415
RPS6KB1	RHEB	0.00405542	-0.0389148	0.100392	0.000408357
RPS6KB1	RPS6	0.0136514	-0.130996	0.142549	0.00194795
RPS6KB1	STK11	0.0140098	-0.134434	0.126042	0.00190693
RPS6KB1	UBASH3B	0.00513364	-0.0492612	0.131049	0.00070006
RPS7	EIF1AX	0.0976185	0.0775612	0.155001	0.015615
RPS7	EIF4E	0.0284613	-0.018354	0.133174	0.0041424
RPS7	RPS8	0.0732135	NA	0.206254	0.0151157
RPS8	RPL17	0.113931	NA	0.254158	0.0289855
RRM2B	CSE1L	0.0398692	0.0299509	0.357965	0.0148664
RRM2B	PNPT1	0.0718848	0.0375853	0.19647	0.0156924
RRS1	RPF1	0.0366269	0.0334623	0.106549	0.00406939
SCYL2	FZD5	0.0937958	0.0742361	0.13281	0.0132804
SDC2	SPRY2	0.022351	NA	0.0855155	0.00207306
SEC11A	RPS8	0.121218	NA	0.287712	0.0387509
SEC11A	SRP9	0.163284	NA	0.386603	0.066659
SEL1L	UBE2J1	0.333948	NA	0.115747	0.0428054
SERPINH1	HSBP1	0.046921	0.013766	0.075917	0.0039187
SFN	CDK8	0.134568	-0.0365745	0.285074	0.0417429
SFN	FOXO1	0.05698	-0.011835	0.215691	0.0134171
SFN	RAN	0.0368092	-0.279977	0.43048	0.0174128
SGK1	FOXO1	0.0302236	-0.00627756	0.178641	0.00542085
SGK3	FOXO1	0.0247812	-0.00514715	0.119378	0.00306246
SGO2	NSL1	0.12654	0.0999101	0.141816	0.0199393
SHMT1	BRCC3	0.114622	0.0497065	0.299252	0.0343354
SHMT1	GCAT	0.136903	NA	0.293272	0.0444137
SIK1	YWHAB	0.100558	0.053488	0.124077	0.0134305
SIK1	YWHAZ	0.161904	NA	0.277012	0.0474094
SIKE1	PDCD10	0.182581	0.0474497	0.342477	0.0625923
SKP2	ANAPC4	0.0232968	-0.0328089	0.053377	0.0013665
SKP2	CCNE2	0.0543985	-0.0766096	0.0865547	0.00499836
SKP2	CDC23	0.0470718	-0.0662913	0.0949494	0.00483182
SKP2	FBXL3	0.0485973	-0.0684396	0.0707557	0.00365413
SKP2	FBXO31	0.0579511	-0.0816126	0.0798548	0.00510781
SKP2	FBXO6	0.0249075	-0.0350772	0.048796	0.00128612
SKP2	FBXW5	0.065865	-0.0927578	0.0148936	0.00104804
SKP2	FOXO3	0.0455136	-0.0640968	0.0597096	0.00299625
SKP2	PSMD1	0.0163346	-0.0230041	0.0297648	0.000540219
SKP2	PSME4	0.0478765	-0.0674246	0.100105	0.00532521
SMAD7	XIAP	0.0456493	0.0135595	0.209695	0.0103935
SMARCA1	RBBP7	0.0189335	-0.0111729	0.131818	0.00275471
SMARCD3	ACTL6A	0.172494	0.0703469	0.115064	0.0200281
SMARCD3	AGT	0.219248	NA	0.24994	0.0608875
SMARCD3	CCNC	0.0752356	-0.102726	0.443659	0.0370877
SMARCD3	CDK8	0.176799	-0.0480527	0.27217	0.0528206
SMARCD3	MED23	0.0650057	-0.0434229	0.2802	0.0199066
SMARCD3	TEAD1	0.0398106	NA	0.0443047	0.00195977
SMURF1	PSMC6	0.00427579	-0.179785	0.12392	0.000577813
SMURF1	PSMD14	0.0632978	-0.0110991	0.397455	0.0277376
SMURF1	RHOA	0.064039	0.012033	0.418346	0.0268441
SNAP25	ITPR3	0.0595223	0.0149662	0.148784	0.00983993
SNAP29	SNAP25	0.0388657	0.00977233	0.0764722	0.0031585
SNAP29	STX17	0.0599717	-0.0144571	0.0506575	0.0030441
SNAP29	VAMP1	0.073206	NA	0.132885	0.0106085
SNW1	CCNC	0.0362648	-0.0495158	0.283695	0.0112685
SNW1	CDK8	0.0844677	-0.0229577	0.172501	0.015907
SNW1	DHX15	0.0680155	-0.026184	0.12571	0.00934451
SNW1	E2F3	0.061612	NA	0.150395	0.0102843
SNW1	PLRG1	0.0763312	-0.0258161	0.190905	0.0147341
SNW1	TFDP1	0.0506905	0.029107	0.147696	0.00830939
SOCS2	CISH	0.0864668	NA	0.104582	0.00986136
SPI1	E2F3	0.0258709	NA	0.176091	0.00498428
SPI1	TFDP1	0.0212849	0.012222	0.172931	0.00402715
SPOPL	KLHL21	0.0219352	-0.0813097	0.198622	0.00481416
SPOPL	KLHL25	0.0470744	-0.174496	0.304714	0.0159203
SPOPL	KLHL9	0.0551176	-0.204311	0.244853	0.0149124
SREBF1	FOXO1	0.0395419	-0.00821301	0.172394	0.00732988
SRF	SCAI	0.190896	-0.013074	0.0865962	0.0181061
SRF	TEAD1	0.0471867	NA	0.0485651	0.00253499
SRP54	RPL17	0.0848744	0.082542	0.100602	0.00880257
SRP54	RPL18A	0.0466018	0.0453212	0.0640722	0.00328119
SRP54	RPL19	0.207477	0.201776	0.11095	0.0246726
SRP54	RPL22	0.10241	0.0995957	0.076563	0.00871201
SRP54	RPL37	0.0439102	0.0427035	0.079821	0.00389439
SRP54	RPL8	0.0991062	0.0963828	0.0817917	0.0083054
SRP54	RPS2	0.0573605	0.0557843	0.110781	0.00681076
SRP54	RPS6	0.115822	0.112639	0.0918756	0.0118236
SRP54	RPS7	0.0508863	0.049488	0.0761693	0.00428285
SRP54	SEC11A	0.0992024	0.0964764	0.125107	0.0129281
SRP54	SSR2	0.094278	0.0916872	0.0653229	0.00684279
SRP9	RPL17	0.131398	NA	0.292402	0.0426901
SRP9	RPL22	0.172206	NA	0.241706	0.0458912
SRP9	RPS2	0.0925294	NA	0.335501	0.0344165
SRP9	RPS6	0.194115	NA	0.289088	0.0620755
SRP9	RPS7	0.0846255	NA	0.237817	0.0223119
SRP9	SF1	0.035014	NA	0.185956	0.00722647
SRSF7	NCBP1	0.114238	NA	0.251897	0.0318321
SRSF7	SON	0.0826311	NA	0.185413	0.0168919
SSR1	CCT4	0.05008	-0.0940091	0.163023	0.00900132
SSR1	RPL17	0.0382566	-0.0718145	0.294676	0.0124292
SSR1	RPL22	0.0497509	-0.0933914	0.241706	0.0132581
SSR1	RPL37	0.0212375	-0.0398667	0.25088	0.00590043
SSR1	RPL8	0.044299	-0.0831572	0.237582	0.0116294
SSR1	RPS2	0.0268209	-0.0503477	0.336617	0.0099761
SSR1	RPS6	0.0564525	-0.105972	0.291007	0.0180528
SSR1	RPS7	0.0244486	-0.0458943	0.237817	0.00644598
SSR1	SEC11A	0.0452803	-0.0849992	0.37109	0.0184852
SSR1	SSR2	0.0503451	-0.0945068	0.226685	0.0114468
SSR2	RPS8	0.12329	NA	0.160774	0.0219511
SSR2	SRP9	0.158008	NA	0.20554	0.0359257
SSTR1	CCR4	0.0109889	0.00622227	0.126922	0.0015497
SSTR1	CXCR4	0.0700952	0.0396901	0.171161	0.0133306
SSTR1	HTR1E	0.00845816	0.00478927	0.175099	0.00164011
STARD13	ARHGEF7	0.110788	0.0661481	0.141588	0.0174292
STARD13	RHOA	0.0672685	0.0126399	0.237721	0.0163341
STARD13	VAV3	0.0472832	NA	0.0265392	0.00139429
STARD8	ARHGEF7	0.137896	0.0823331	0.125194	0.0191819
STARD8	RHOA	0.0838131	0.0157486	0.21041	0.017995
STAT3	ELP2	0.476623	NA	0.223622	0.117383
STAT3	FES	0.0455407	NA	0.221023	0.0105953
STAT3	FOXO1	0.0929637	-0.0193089	0.173791	0.0162701
STAT3	RAC1	0.0411169	-0.159131	0.160023	0.00659285
STAT3	RHOA	0.150733	0.028323	0.317759	0.0504709
STAT3	SDC2	0.305439	NA	0.176713	0.0593786
STAT3	SOCS2	0.264429	NA	0.129898	0.0365801
STK11	FOXO1	0.0394779	-0.00819971	0.16334	0.00709386
STK11	PPM1A	0.0781535	-0.0880188	0.115756	0.00925025
STK11	PSEN2	0.221904	0.0237803	0.210357	0.0516934
STK11	RAC1	0.0177554	-0.0687171	0.152939	0.00292304
STK11	WDR6	0.106846	NA	0.0843622	0.00982959
STK24	PDCD10	0.0482374	0.0125361	0.197065	0.00951541
STRN3	CCT4	0.145882	0.0871466	0.0820209	0.0119774
STRN3	SIKE1	0.212313	0.126831	0.157832	0.0335434
STRN3	STK24	0.0560927	0.0335085	0.0908181	0.00509933
STUB1	BAG1	0.0466655	-0.0149303	0.0923336	0.00439673
STUB1	PARK2	0.159382	-0.027157	0.148856	0.0251324
STUB1	UBE2D1	0.135312	NA	0.167358	0.0226683
STUB1	UBE2N	0.26982	0.237221	0.194933	0.0527023
STX17	STX8	0.0407557	-0.00982481	0.0612103	0.00276878
STX17	VTI1A	0.174745	-0.0421251	0.0678399	0.0122087
STX1A	SNAP25	0.0531552	0.0133653	0.0953043	0.00545308
STX1A	VAMP1	0.107829	NA	0.178359	0.0197254
STX8	NAPG	0.110799	0.0385949	0.155348	0.0183307
TAB2	NR2C2	0.0485257	0.0217402	0.223713	0.0113793
TAB2	PSEN2	0.0768125	0.00823159	0.266031	0.0222841
TAB2	UBE2N	0.0685582	0.0602751	0.510169	0.0364716
TAB2	WNT1	0.0665051	0.0454284	0.265923	0.0196503
TAB2	XIAP	0.0464937	0.0138103	0.269611	0.0129899
TAC1	AGT	0.089807	NA	0.212246	0.0204959
TAF1A	MTA1	0.0460214	NA	0.33489	0.0171245
TAF1A	RBBP7	0.00755756	NA	0.291519	0.00244797
TAF5	GTF2A1	0.04053	0.0266886	0.129041	0.00539178
TAF5	TAF2	0.016338	-0.00440956	0.023216	0.000379683
TAF7	TAF2	0.185429	-0.0500463	0.0545912	0.0101329
TANK	TBK1	0.0132814	-0.0826377	0.305504	0.00406157
TBK1	SIKE1	0.0159368	-0.0991597	0.314248	0.00515235
TBL1XR1	CCNC	0.0247484	-0.0337914	0.332167	0.00907351
TBP	BRF1	0.0668459	NA	0.205298	0.0137371
TBP	E2F3	0.0679391	NA	0.123252	0.00895574
TBP	ERCC6	0.0635312	0.0320747	0.0948394	0.00605554
TBP	GTF2A1	0.209195	0.137753	0.162753	0.0340812
TBP	HMGB1	0.230594	0.201761	0.0993139	0.0232263
TBP	HNRNPK	0.088536	0.0131453	0.0997587	0.00945636
TBP	MNAT1	0.136535	0.0825264	0.102505	0.0152291
TBP	POLR2L	0.024398	NA	0.0445602	0.00116276
TBP	TAF1A	0.0405838	NA	0.205561	0.00836756
TBP	TAF2	0.0818807	-0.0220992	0.0284311	0.00233029
TBP	TEAD1	0.0205245	NA	0.0225201	0.000502952
TBP	TFDP1	0.0557167	0.0319931	0.120651	0.00721275
TCEB1	NCBP1	0.269492	0.155096	0.167454	0.0501417
TDP2	ETS1	0.159649	0.11679	0.264344	0.0437783
TEAD1	CHD9	0.0383442	NA	0.0303413	0.00129268
TEAD1	CTGF	0.0309295	NA	0.0342215	0.00115932
TEAD1	NCOA2	0.048613	NA	0.0364842	0.00194901
TEAD1	TBL1XR1	0.0130088	NA	0.0329513	0.000476283
TEAD4	TEAD1	0.0159042	NA	0.0271742	0.000479671
TFDP1	MAML3	0.0279319	0.0160387	0.185793	0.00576617
TFDP1	RBBP7	0.0116912	0.00671321	0.192798	0.00237768
TFDP1	RYBP	0.0787748	0.0452332	0.214445	0.0182231
TIPIN	ATR	0.123385	NA	0.202676	0.0261854
TIPIN	CLSPN	0.0343747	NA	0.0895238	0.00316275
TIPIN	DSCC1	0.0755733	NA	0.0937288	0.00770772
TIPIN	MCM4	0.0791413	NA	0.230813	0.0192689
TIPIN	RAD1	0.0800989	NA	0.346917	0.028297
TLN1	PRKACB	0.635635	0.451893	0.276515	0.194643
TLN1	RAC1	0.0383459	-0.148406	0.195336	0.00800248
TLN1	RHOA	0.147833	0.0277781	0.407907	0.0644253
TMEM214	GRAMD3	0.0126336	-0.0388103	0.0775548	0.00108866
TNFRSF1A	PRKCI	0.0567839	0.0480149	0.137513	0.00867612
TNKS2	PSMC6	0.00470948	-0.19802	0.06364	0.000327912
TNKS2	PSMD14	0.0698697	-0.0122515	0.20456	0.0157755
TOLLIP	PELI1	0.23041	0.145478	0.27766	0.0707694
TOLLIP	TIRAP	0.0533597	0.0336906	0.0714878	0.00399013
TOPBP1	ATR	0.07075	NA	0.240841	0.0170908
TOPBP1	CLSPN	0.0188999	NA	0.102005	0.00197935
TOPBP1	FANCB	0.0237213	NA	0.293881	0.00774582
TOPBP1	FANCL	0.120096	NA	0.299767	0.0398679
TOPBP1	RAD1	0.0430538	NA	0.386433	0.0173126
TOPBP1	TCF20	0.0240988	NA	0.22856	0.00578573
TOPBP1	ZBTB17	0.13264	NA	0.313977	0.0432459
TOPORS	UBE2D1	0.0403613	NA	0.425639	0.0181408
TRAM1	RPL17	0.0488345	0.0261736	0.0943731	0.00512074
TRAM1	RPL22	0.063507	0.0340375	0.077409	0.00546223
TRAM1	RPL37	0.0272298	0.0145942	0.080703	0.0024417
TRAM1	RPL8	0.0566726	0.0303745	0.0762561	0.00480181
TRAM1	RPS2	0.0343126	0.0183903	0.108043	0.00411916
TRAM1	RPS6	0.071824	0.0384952	0.0928908	0.0074131
TRAM1	RPS7	0.0313816	0.0168194	0.0765855	0.00267041
TRAM1	SEC11A	0.0594033	0.0318381	0.122142	0.00782697
TRAM1	SSR2	0.0645054	0.0345727	0.0728693	0.0047336
TRRAP	ACTL6A	0.0481589	0.0196403	0.0563171	0.00271761
TRRAP	TAF2	0.0417646	-0.0112721	0.0257854	0.00116047
TSR1	MRPL19	0.192362	-0.141283	0.171778	0.0365122
TSR1	MRPL39	0.0262842	-0.0561308	0.321428	0.00927385
TSR1	PWP1	0.239347	NA	0.0460877	0.0117601
TSR1	WDR75	0.048191	-0.0218206	0.323203	0.0169483
TUBGCP3	CALM1	0.0617688	NA	0.136278	0.00931164
TUBGCP3	CENPJ	0.0127892	NA	0.13233	0.00186799
TUBGCP3	CEP152	0.258418	NA	0.202005	0.0580018
TUBGCP3	CEP192	0.0913566	NA	0.202529	0.0200459
TUBGCP3	CEP63	0.0658178	NA	0.075978	0.00555634
TUBGCP3	CEP70	0.0641585	NA	0.132358	0.00943547
TUBGCP3	CKAP5	0.180993	NA	0.188401	0.0354096
TUBGCP3	CLASP2	0.123465	NA	0.12667	0.0169993
TUBGCP3	KLHL21	0.0771593	NA	0.139896	0.0119936
TUBGCP3	PLK4	0.117437	NA	0.151323	0.0188052
TUBGCP3	SKA3	0.047342	NA	0.076581	0.00402833
TUBGCP3	TBL1XR1	0.0624521	NA	0.152257	0.0105653
TUBGCP3	TUBGCP4	0.0774871	NA	0.202472	0.0157047
TUBGCP6	MZT1	0.0601499	-0.0942521	0.0129636	0.000780542
TUBGCP6	PRKAR2B	0.164365	0.129537	0.0668193	0.0121625
TUBGCP6	TUBGCP3	0.0845587	NA	0.0726223	0.00614699
U2AF1	NCBP1	0.258415	0.182157	0.230205	0.064451
UBA6	UBE2D1	0.0508631	NA	0.330224	0.0186005
UBA6	UCHL3	0.0527905	0.00159778	0.210535	0.0117363
UBE2D1	CDC23	0.0899067	NA	0.417179	0.040287
UBE2D1	PSME4	0.0908544	NA	0.436998	0.0441146
UBE2N	MAP3K7	0.0847576	0.0745173	0.169406	0.0144017
UBE2N	PELI1	0.217676	0.191377	0.380017	0.085899
UBE2N	RNF8	0.0744397	0.0654461	0.172126	0.0128258
UBE2N	ZNRF2	0.0898302	0.0789771	0.169319	0.0159768
UFM1	YAP1	0.163156	0.127246	0.358364	0.0643228
UFM1	ZFYVE19	0.31813	0.248111	0.307184	0.106803
USP13	SERPINC1	0.0345212	NA	0.088199	0.00310687
USP15	LSM6	0.0303801	0.011507	0.101108	0.00331
USP15	SMAD7	0.0729333	0.0276247	0.25868	0.019632
USP15	SMURF1	0.173397	0.0656772	0.297535	0.056078
USP15	WAPL	0.25375	0.0961121	0.258118	0.0664274
UTP15	WDR75	0.0188136	-0.00851865	0.403327	0.00760322
UTP20	NIFK	0.0847322	NA	0.105405	0.00981453
UTP20	WDR75	0.0195082	-0.00883317	0.200759	0.00397206
UTRN	ARHGEF7	0.114351	0.068275	0.0719917	0.00913684
UTRN	RHOA	0.0643954	0.0121	0.112104	0.00794169
VAV2	CHN1	0.00347465	-0.00102507	0.0107865	4.16437e-05
VAV2	RHOA	0.0176496	0.0033164	0.107652	0.00191728
VAV3	ITK	0.00863726	NA	0.0442883	0.000413545
VAV3	RHOBTB2	0.0989369	NA	0.0480355	0.00520535
VAV3	STARD8	0.0588524	NA	0.0234662	0.00153449
VAV3	VAV2	0.0122966	NA	0.0119124	0.000162217
VCL	RAB5A	0.163032	0.142542	0.350165	0.0604746
VCL	RHOA	0.0845311	0.0158836	0.551571	0.0474795
VEGFA	RHOA	0.0655125	0.0123099	0.435259	0.0298898
VPS37C	PDCD6IP	0.0738466	0.0679279	0.0601931	0.00463993
VPS4B	CHMP1B	0.0490832	-0.00533963	0.105719	0.00519943
VPS4B	VPS37C	0.0667975	-0.00726672	0.0783464	0.00557332
VPS4B	VTA1	0.036358	-0.00395529	0.243604	0.00889251
VPS4B	YAP1	0.0689749	-0.0075036	0.243175	0.0180549
VPS4B	ZFYVE19	0.1408	-0.0153172	0.218224	0.0313849
VTA1	PDCD6IP	0.036431	0.0335111	0.169633	0.00671
WAPL	BUB1	0.0165566	-0.286867	0.0223984	0.000405291
WAPL	NSL1	0.338105	0.266952	0.251853	0.0946144
WDR75	NOC2L	0.0235888	-0.0106808	0.345697	0.00889266
WDR75	NOP56	0.0382899	-0.0173374	0.342718	0.0136552
WNT1	CDK19	0.355838	0.243066	0.220279	0.0870931
WNT1	CTNNB1	0.0956013	0.0653035	0.268647	0.0272355
WNT1	FZD5	0.273333	0.186709	0.220803	0.061837
WNT1	MAP3K7	0.0805794	0.0550423	0.086541	0.0076046
WNT1	NCOA2	0.44879	0.30656	0.220217	0.109448
WNT10A	WNT1	0.0618647	0.0422586	0.175194	0.0119497
WNT4	NR0B1	0.0324797	NA	0.264234	0.00915926
WNT4	TMED5	0.0279048	0.00558521	0.21864	0.00669714
WNT4	WNT1	0.0349428	0.0238687	0.239198	0.00924586
WRN	ATR	0.0890928	NA	0.19355	0.017383
WRN	MLH3	0.0456352	NA	0.104346	0.00509837
WRN	RAD52	0.0111685	NA	0.165884	0.00185825
WRN	XRCC6	0.0981895	NA	0.212056	0.0208425
XIAP	MAP3K7	0.0570648	0.0169503	0.088881	0.00509235
XRCC3	BRCA2	0.140491	NA	0.185659	0.0262409
XRCC3	RAD52	0.0194937	NA	0.116477	0.00230047
XRCC6	CETN2	0.0523921	-0.14753	0.241262	0.0139363
YAP1	PSEN2	0.152948	0.0163906	0.249962	0.0423848
YAP1	TEAD1	0.0160623	NA	0.0463536	0.000745289
YAP1	UBE2D1	0.067788	NA	0.40751	0.0295447
YAP1	YWHAB	0.0835169	0.0444237	0.168922	0.0141645
YAP1	YWHAZ	0.119986	NA	0.336515	0.0446155
YWHAB	CTNNB1	0.0544436	0.0289592	0.164	0.0093202
YWHAB	DDIT4	0.0723176	0.0384667	0.157324	0.011901
YWHAB	FOXO3	0.108815	0.0578799	0.110488	0.0121688
YWHAB	PPP2R2B	0.098205	0.0522364	0.110187	0.0120232
YWHAB	SFN	0.156826	0.0834176	0.168329	0.029299
YWHAB	TBC1D4	0.129106	0.0686733	0.113734	0.0159434
YWHAH	FOXO1	0.0123623	-0.00256771	0.215872	0.00289444
YWHAH	MARK3	0.0281899	0.00538709	0.0442189	0.0012904
YWHAH	RAN	0.00793413	-0.0603483	0.428038	0.00373198
YWHAH	YWHAB	0.035154	0.0186989	0.174062	0.00653039
YWHAH	YWHAZ	0.0580744	NA	0.398728	0.0236526
YWHAQ	CBL	0.066189	0.0451611	0.176711	0.0118744
YWHAQ	CTNNB1	0.108284	0.0738825	0.322822	0.0379135
YWHAQ	DDIT4	0.140695	0.0959972	0.302924	0.0473555
YWHAQ	FOXO3	0.207348	0.141475	0.208368	0.0474255
YWHAQ	HDAC4	0.432072	0.294805	0.324333	0.140276
YWHAQ	PPP2R2B	0.203173	0.138626	0.225614	0.0508754
YWHAQ	SFN	0.334163	0.228002	0.35498	0.127687
YWHAQ	SIK1	0.206915	0.14118	0.25268	0.0565227
YWHAQ	TBC1D4	0.271443	0.185207	0.23666	0.0685589
YWHAQ	YAP1	0.169994	0.115988	0.340289	0.0589676
YWHAQ	YWHAH	0.0757496	0.0516844	0.371203	0.0287805
YWHAZ	ATR	0.207305	NA	0.263085	0.0588971
YWHAZ	CLSPN	0.0555231	NA	0.111717	0.0068389
YWHAZ	CTNNB1	0.0897663	NA	0.374951	0.0336916
YWHAZ	FOXO3	0.171005	NA	0.240769	0.0419274
YWHAZ	PPP2R2B	0.155274	NA	0.24158	0.0416791
YWHAZ	RAD1	0.12791	NA	0.428005	0.0604929
YWHAZ	SFN	0.266125	NA	0.396088	0.109006
YWHAZ	TBC1D4	0.205463	NA	0.250982	0.0556284
ZFYVE19	UBE2D1	0.128641	NA	0.339969	0.0477445
ZWILCH	NSL1	0.65811	0.519612	0.326108	0.23584
ZYX	RHOA	0.0473273	0.0088929	0.312675	0.0157259
