# Supplementary figures and images for: FoxP2 isoforms delineate spatiotemporal transcriptional networks for vocal learning in the zebra finch
Source: eLife journal article supplement (doi:10.7554/elife.30649), 2018-01-23

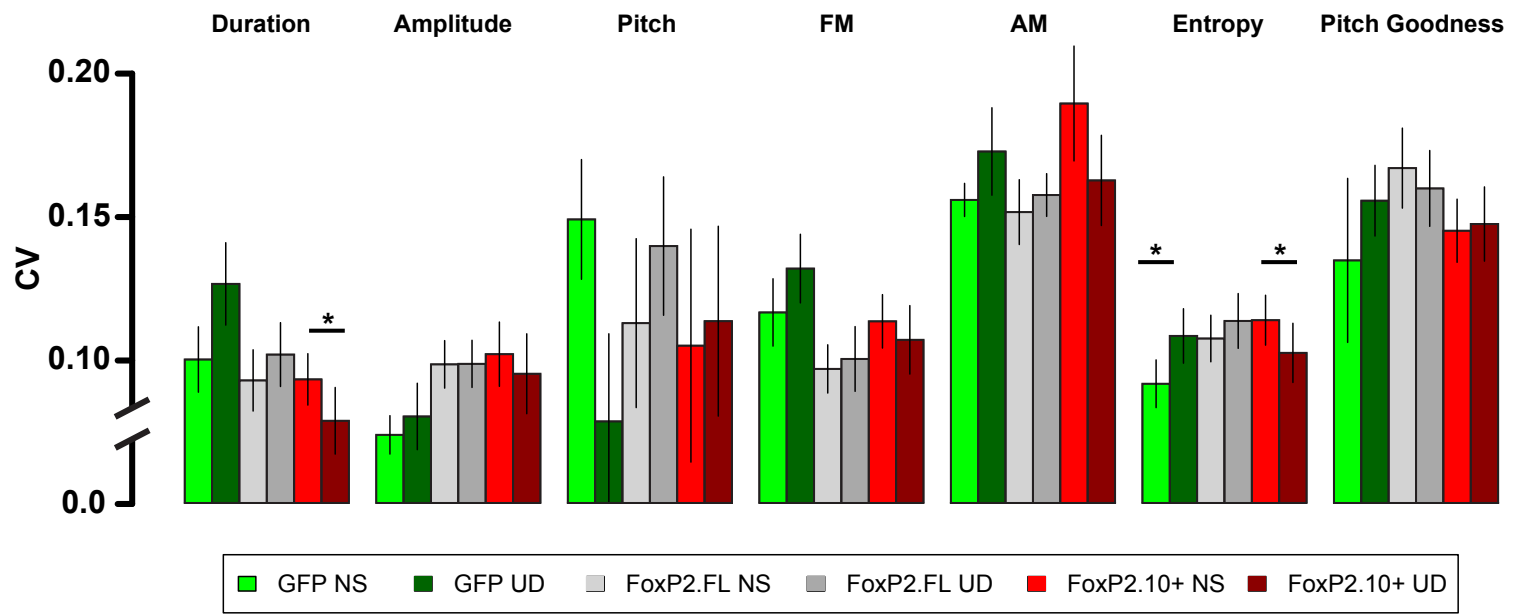

Supplement: supp [file elife-30649-supp-v1.zip]

# GFP vs. non-GFP

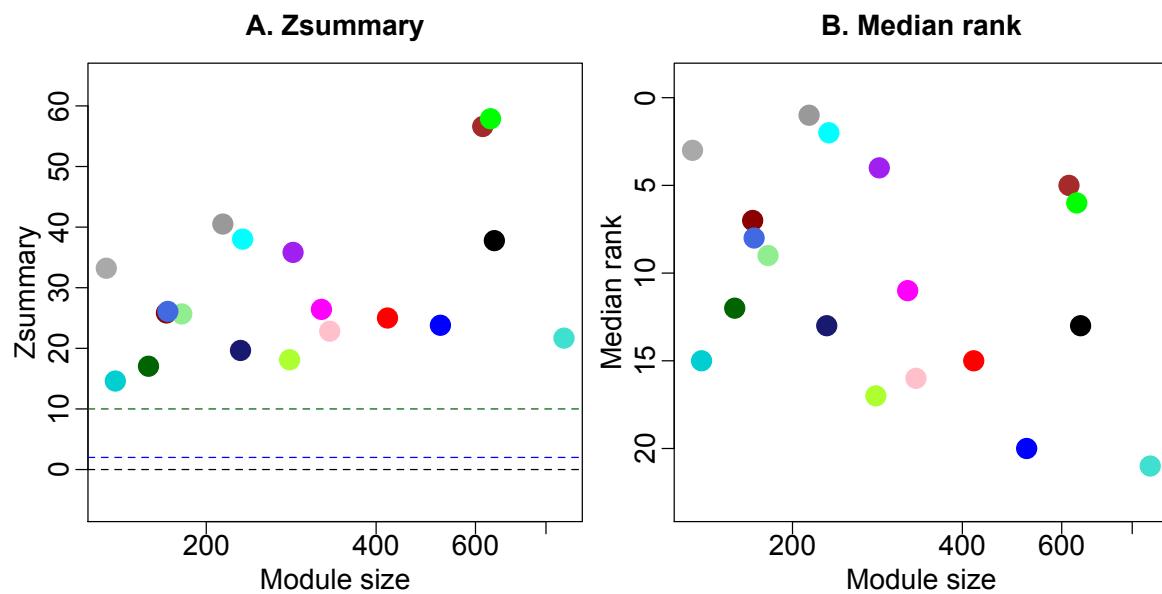

# FoxP2.FL vs. GFP

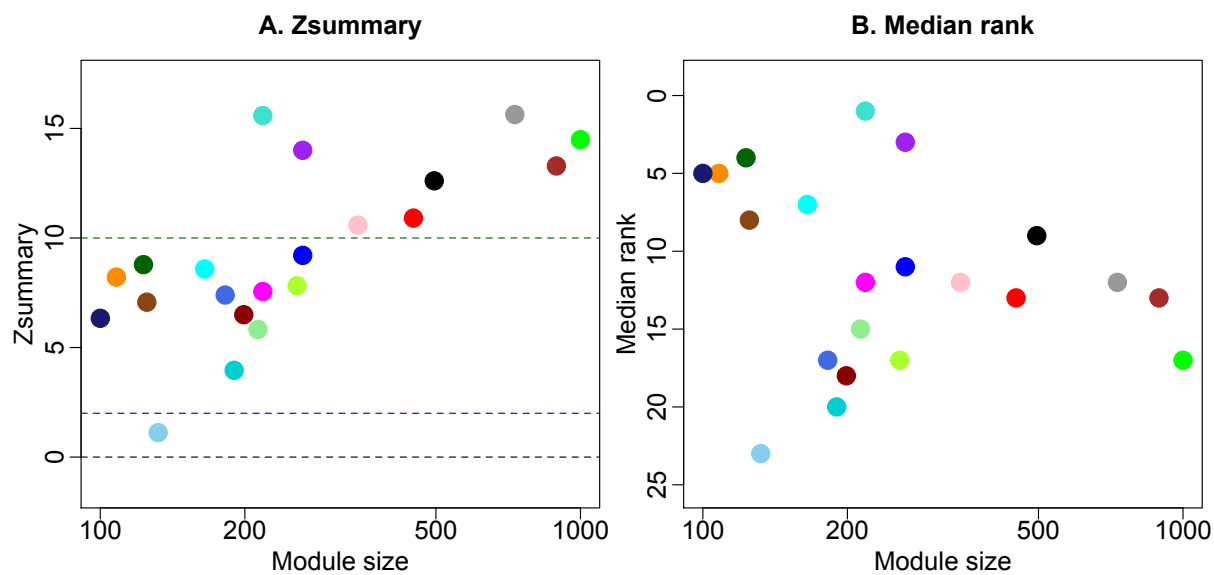

# FoxP2.10+ vs. GFP

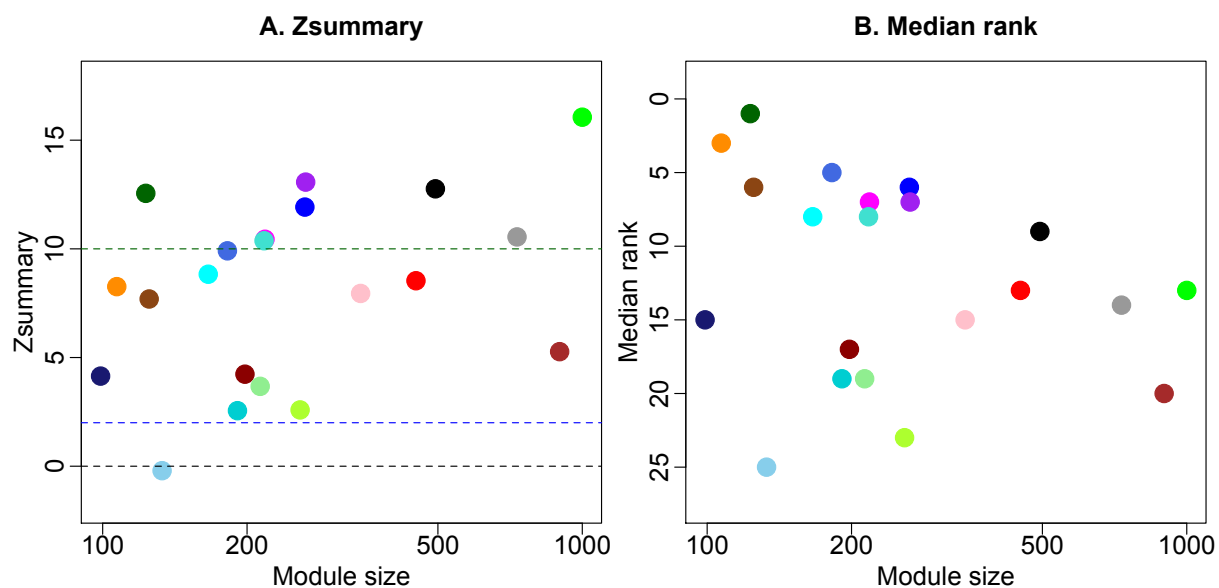

Supplement: supp [file elife-30649-supp-v1.zip]

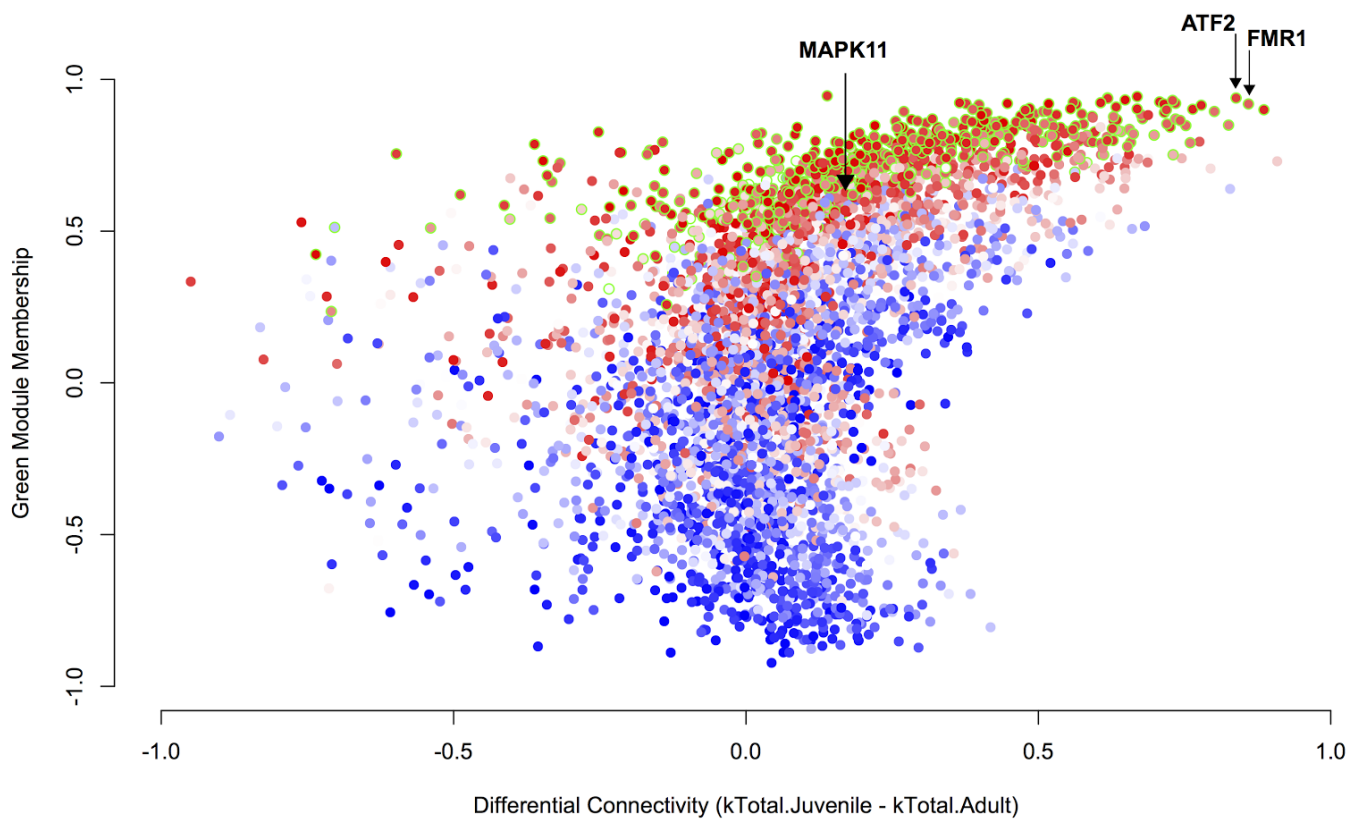

Supplement: supp [file elife-30649-supp-v1.zip]

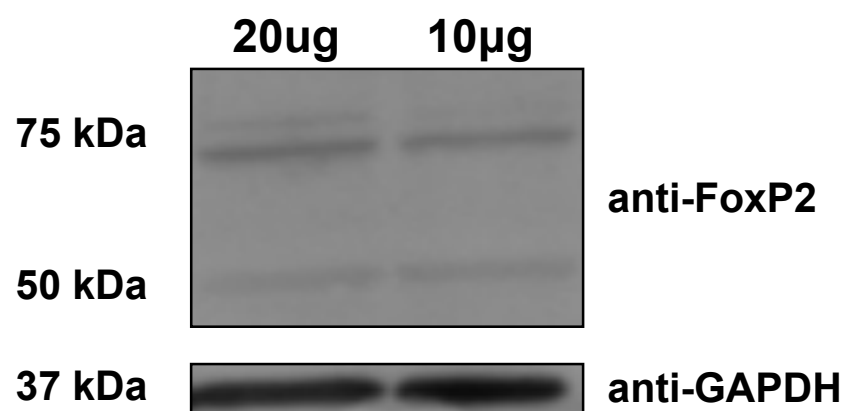

Supplement: supp [file elife-30649-supp-v1.zip]

Area X: GFP only

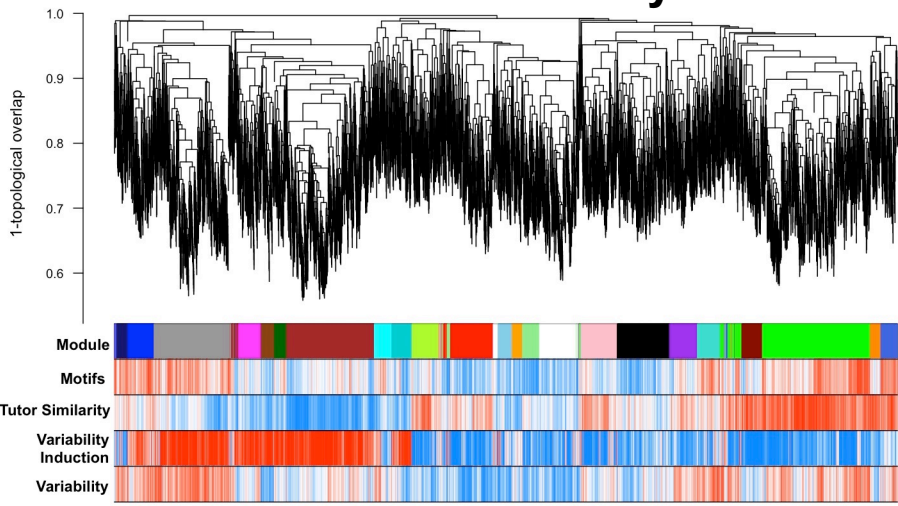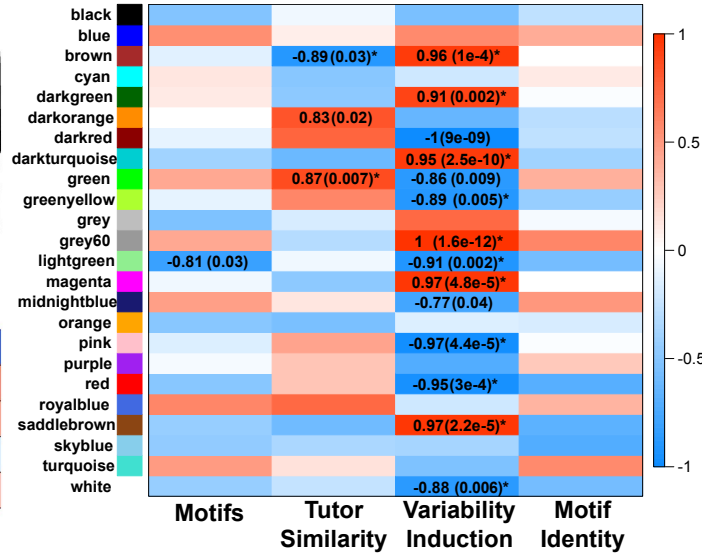

Supplement: supp [file elife-30649-supp-v1.zip]

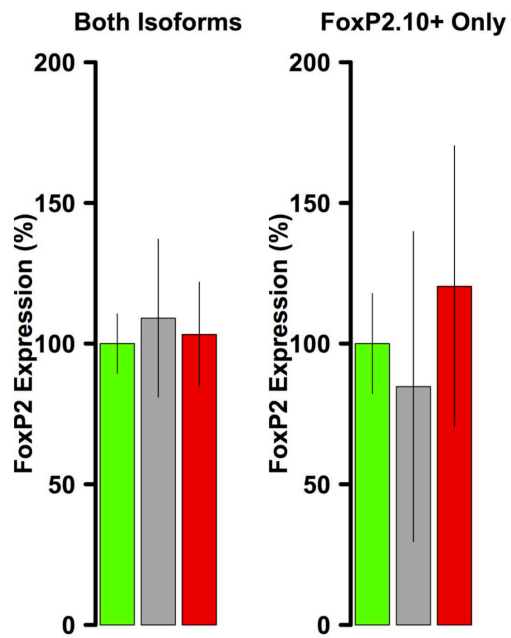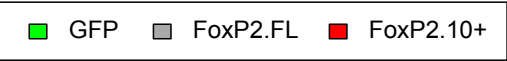

Supplement: supp [file elife-30649-supp-v1.zip]

## Area X: FoxP2.FL only

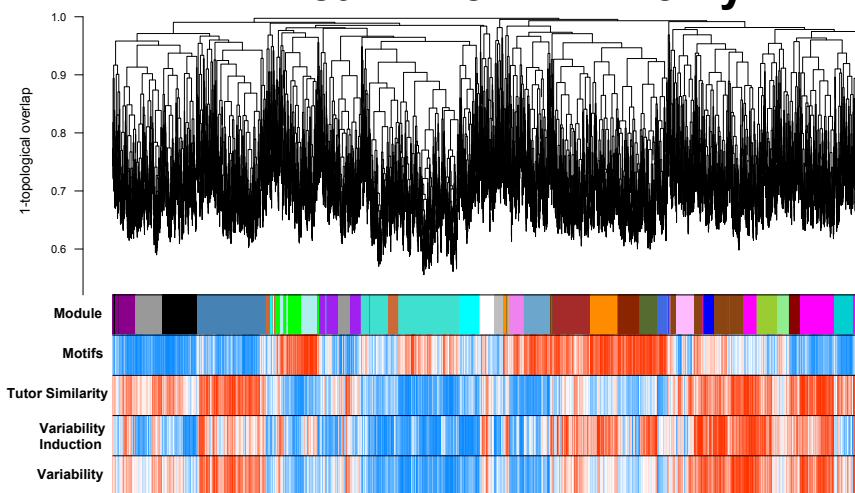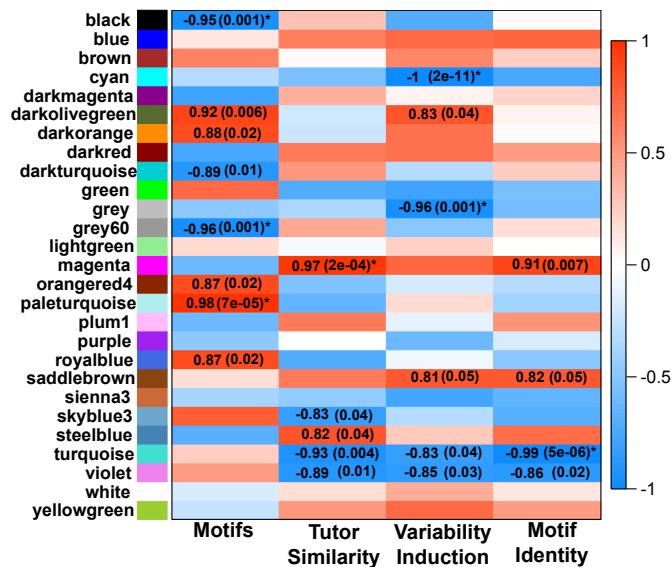

Supplement: supp [file elife-30649-supp-v1.zip]

Area X: FoxP2.10+ only

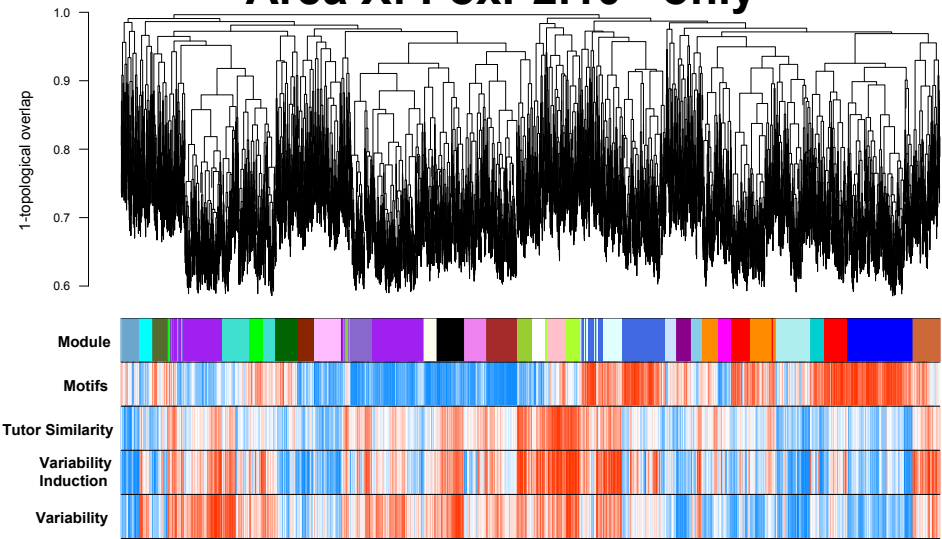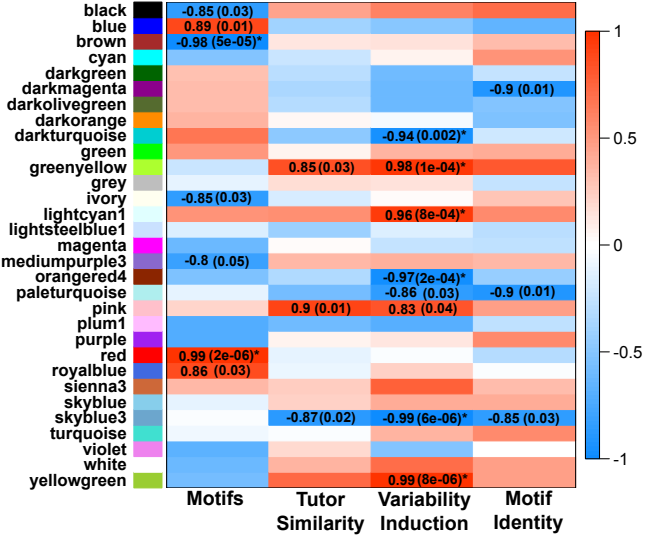

Supplement: supp [file elife-30649-supp-v1.zip]

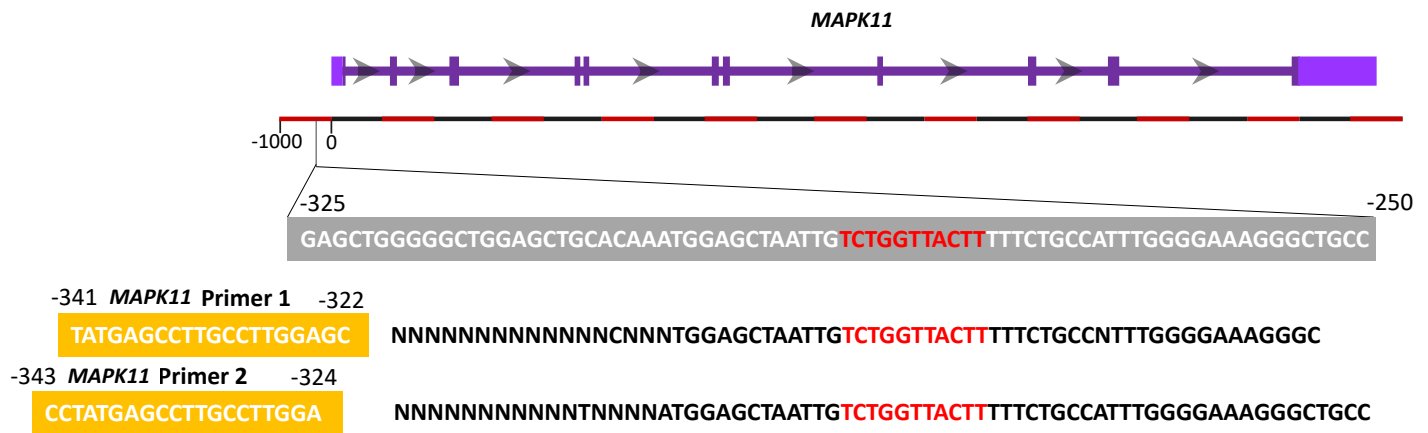

Supplement: supp [file elife-30649-supp-v1.zip]

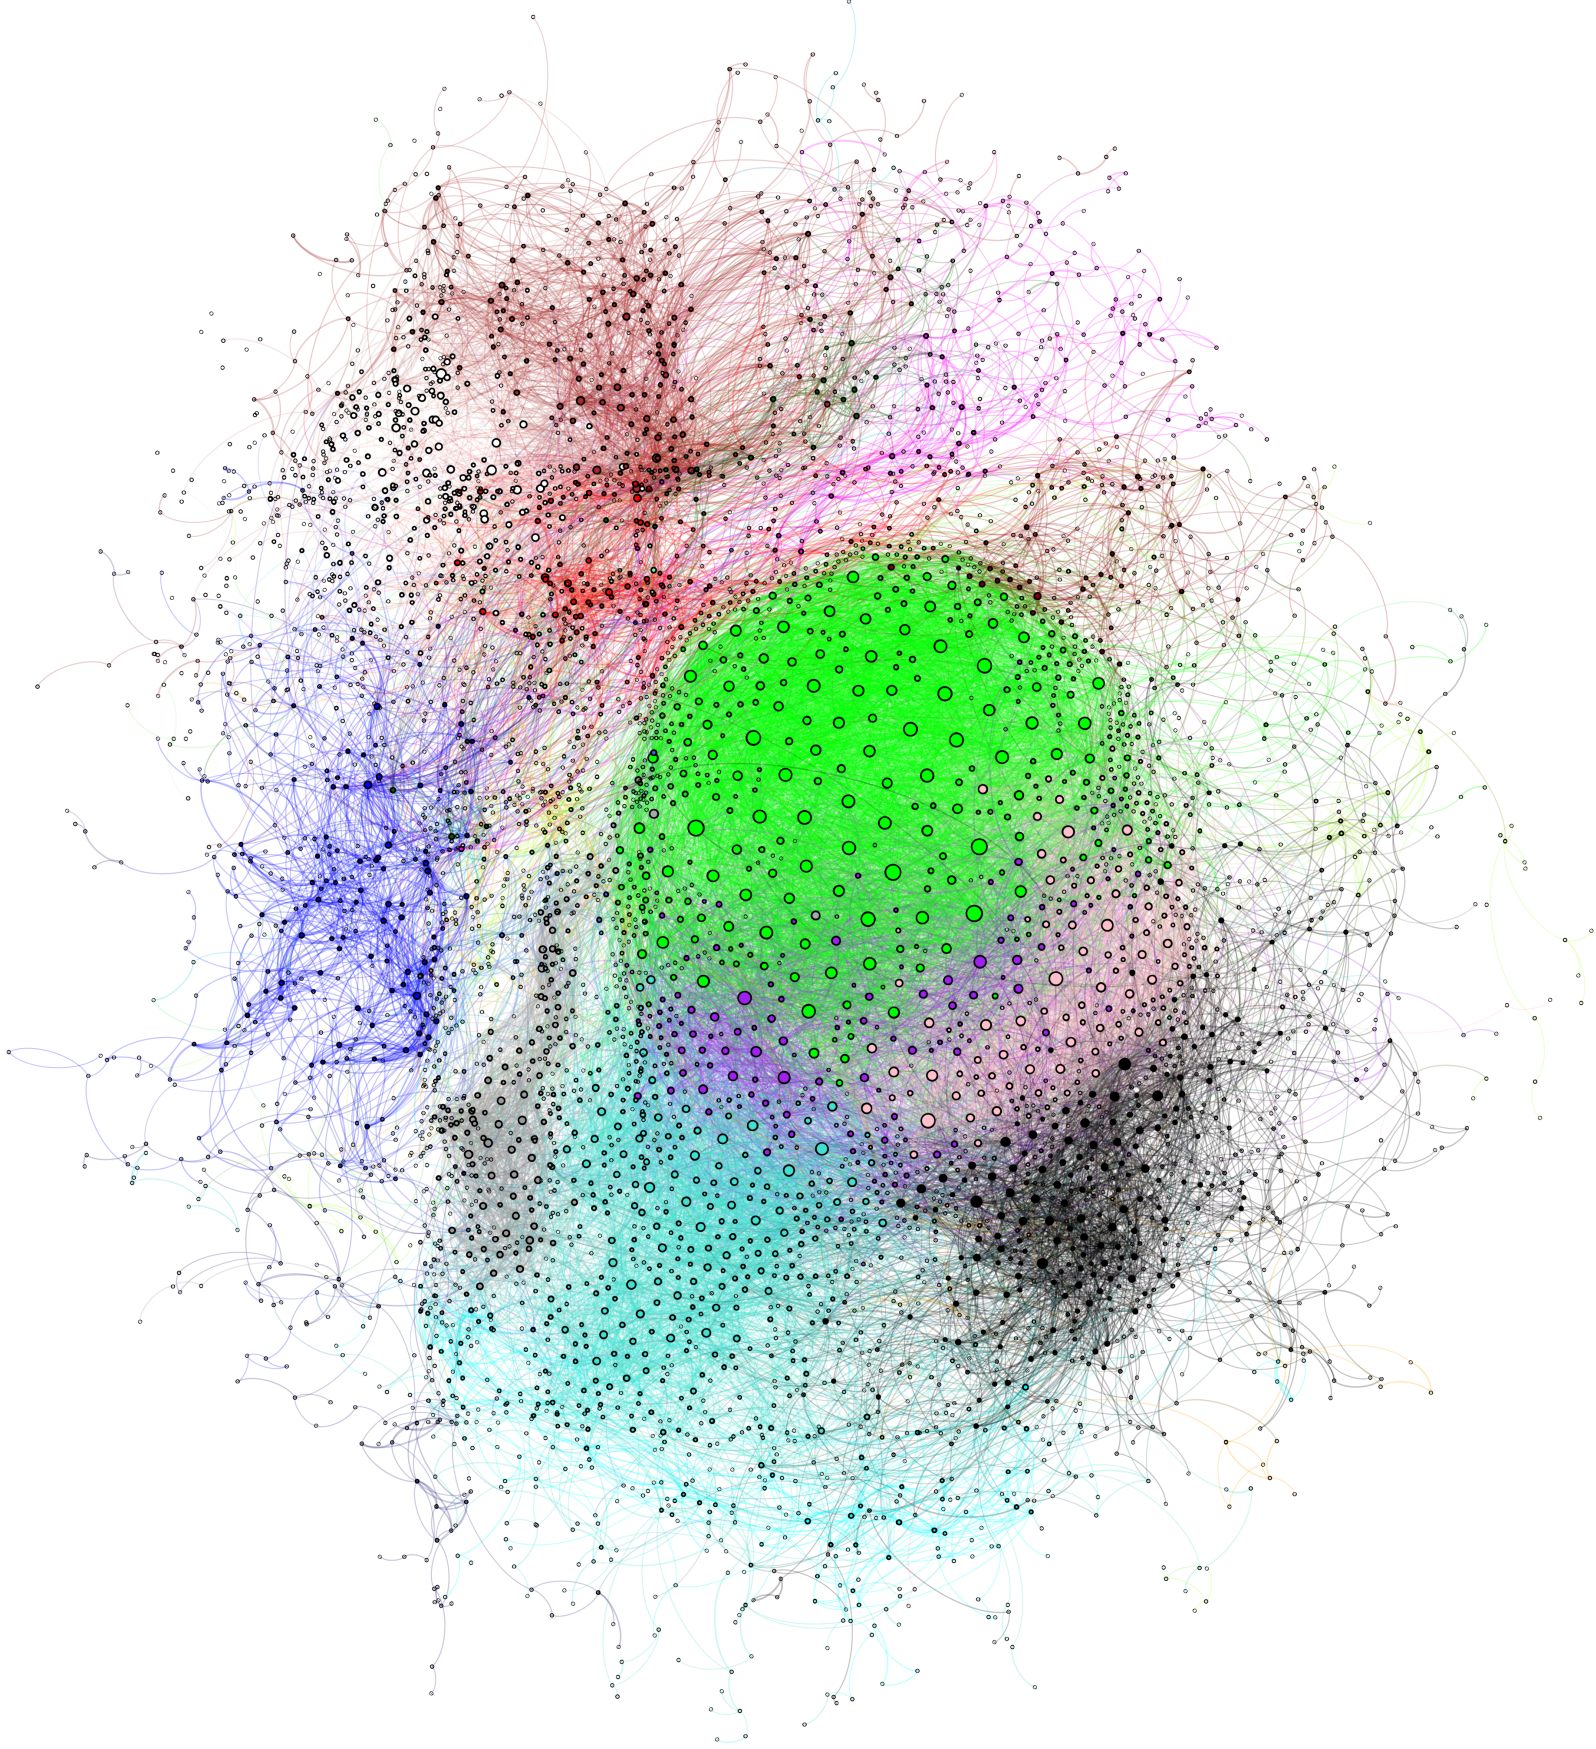

Supplement: supp [file elife-30649-supp-v1.zip]

### Cluster Dendrogram

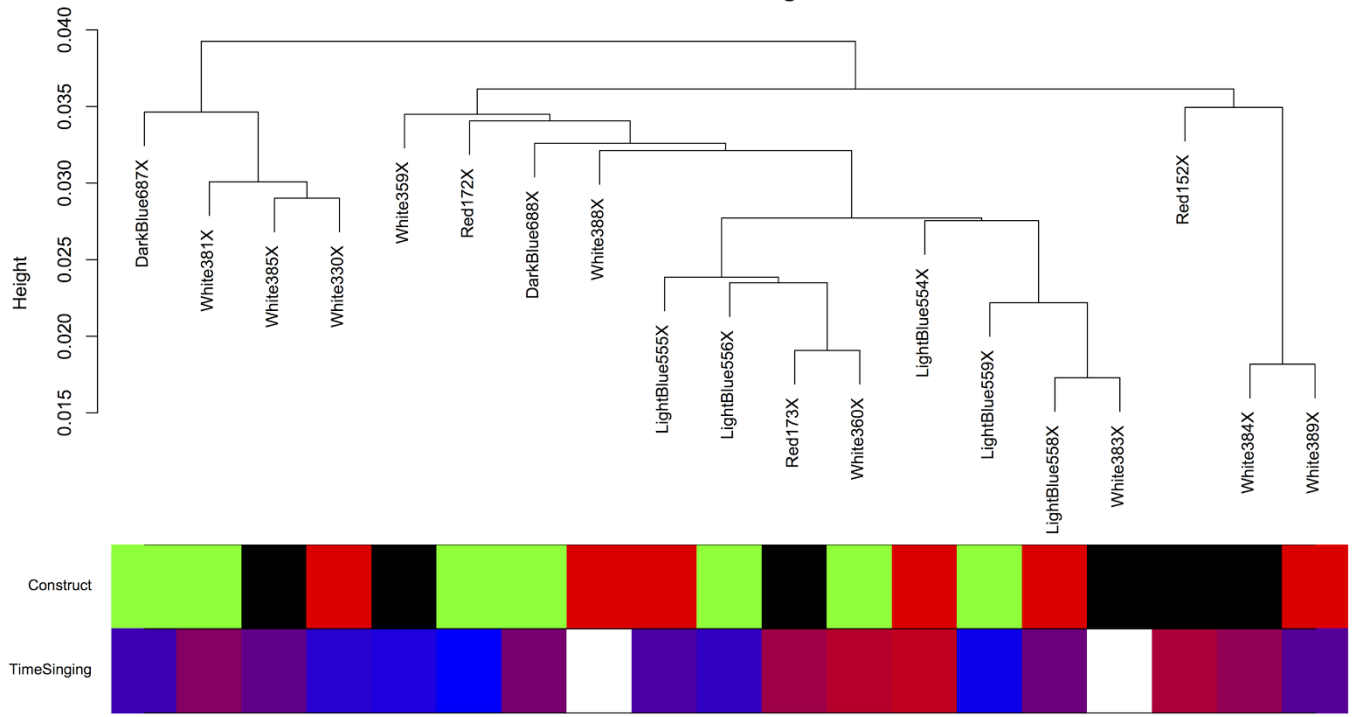

Supplement: supp [file elife-30649-supp-v1.zip]
